# Supplementary material
Source: PubMed Central journal article supplement (PMC2867707)
Supplement: 1002355107_stxt.pdf [file 1002355107_stxt.pdf]

## SUPPORTING INFORMATION

### SUPPORTING TEXT

*Phylogenetic binning of microbiome scaffolds* - Microbiome scaffolds were binned with PhyloPythia, a phylogenetic classifier which uses a multi-class Support Vector machine (SVM) for the composition-based characterization of sequence fragments at different taxonomic ranks (1). Generic models for the taxonomic ranks of domain, phylum and class were combined with models for 15 genera and 14 family-level clades in the sample. The generic models represent all clades covered by three or more species at the corresponding ranks among all sequenced microbial isolates. At the rank of family, a sample-specific model for TS28 and TS29 was created for Enterobacteriaceae, Bacteroidaceae, Streptococcaceae, Methanobacteriaceae, Bifidobacteriaceae, Clostridiaceae, Coriobacteriaceae, Erysipelotrichaceae, Rikenellaceae, Porphyromonadaceae, Lachnospiraceae, Eubacteriaceae, Ruminococcaceae, and ‘Other.’ A sample-specific model for abundant genera in TS28 and TS29 was created for *Providencia*, *Bacteroides*, *Ruminococcus*, *Streptococcus*, *Lactococcus*, *Clostridium*, *Bifidobacterium*, *Eubacterium*, *Methanobrevibacter*, *Colinsella*, *Dorea*, *Faecalibacterium*, *Alistipes*, *Parabacteroides*, and ‘Other.’

The family- and genus-level models were trained with sample-specific contigs identified based on their homology to sequenced human gut isolates and with data from 1,775 finished or draft genome sequences [NCBI database as of May 2009 combined with sequences from gut microbial genomes (118 gut microbial genomes included in total; **Table S7**)]. Contigs for training were selected through BLASTN comparisons of all

contigs to the database of 118 gut genomes. High confidence matches were selected using stringent parameters: e-value $<10^{-5}$ , bitscore $>50$ , percent identity $>90$ , percent sequence aligned $>90$ , and total contig length $>2$ Kbp. Additionally, we required that all significant matches were from the same reference genome.

For each model, five sample-specific multi-class SVMs were created using fragments with lengths of 3, 5, 10, 15 and 50Kbp, respectively. All input sequences were extended by their reverse complement prior to computing the compositional feature vectors. The parameters  $w$  and  $l$  were both set to 5 for the sample-specific models. The final classifier, consisting of the sample-specific and generic clade models, was used to assign all fragments  $>1$ Kbp from the fecal microbiomes. In the case of conflicting assignments, preference was given to those from the sample-specific models.

Fecal microbiome sequence bins were validated using a set of 30 marker genes, previously shown to have generally consistent phylogeny to the 16S rRNA gene (2). All genes from the microbiome bins were assigned to STRING orthologous groups (version 7.1; BLASTP e-value cutoff =  $10^{-10}$ ). Each set of marker genes from the 122 gut microbial genomes and the microbiome bins were translated into amino acid sequences and then aligned using clustalw prior to building a neighbor-joining tree (3). Individual sequences were assigned to taxa based on the consensus taxonomy of all sequences found at the first node. Additionally, the frequency of consistent taxonomy between database marker genes and nearest neighbor sequences was tallied, and used as a control for the frequency of mis-assignment due to alignment errors, improper clustering, and/or disagreement with the marker genes and NCBI taxonomy. Overall, the results were consistent with accurate binning at each taxonomic level evaluated (**Fig. S3**). Additionally, gene clusters from the

microbiome bins showed a level of taxonomic consistency similar to the gut microbial genomes, providing additional support for the binning method (**Fig. S2B**).

*Analysis of gene, bin, and transcript abundance* - All pre-processed DNA and cDNA sequencing reads were mapped against our database of 122 gut microbial genomes and microbiome bins using SSAHA2 (4) (**Table S7**). On average,  $72.67 \pm 1.61\%$  of the DNA sequences and  $73.75 \pm 11.45\%$  of the cDNA sequences were mapped. Of the assigned sequences, 99% of the DNA sequences mapped to coding sequences (CDS), as opposed to only 5% of the cDNA sequences due to the high representation of non-coding rRNA transcripts (**Fig. S10A,B**). An analysis of 18 shallower fecal microbiome datasets (5) revealed that addition of the microbiome bins to the database improved the percentage of assignments for all samples, but had the largest impact on TS28 and TS29 (**Fig. S11E**).

The unassigned DNA sequences formed a bimodal length distribution (**Fig. S10C**), indicating that roughly 17% were unassigned due to their short length, while the other 83% may be either sequencing errors or novel unassembled sequences. To explore this further, we isolated the unassigned reads from all datasets (1,343,346 in total) and assembled them with Newbler based on flowgram information (average large contig size=904bp) (**Table S13**). The resulting assembly consisted of 106,978 contigs, comprised of 41.93% of the unassigned reads, leaving 508,756 unmapped singletons. BLASTN comparison of the contigs and singleton reads against the NCBI Entrez nucleotide database (November 3, 2009 release) resulted in assignment of an additional 7,554 contigs (7.1%) and 64,158 sequencing reads (12.6%; BLASTN E-value $\leq 10^{-5}$ , Bitscore $\geq 50$ , %identity $\geq 50$ , and  $\geq 50\%$  of the query sequence aligned); these were split between matches to uncultured bacterial sequences (22% of matches) and to microbial

genomes (78%, e.g. gut microbial genomes which were missed in the more stringent SSAHA search). The remaining unmapped contigs represent putative novel genomic fragments or viruses found at relatively low abundance in the surveyed gut microbiomes.

Comparisons of the frequency of sequence assignments to the microbiome bins and the 122 gut microbial genomes revealed that most DNA sequences mapped best to the bins, while cDNA sequences were more evenly split between bins and gut genomes (**Fig. S11A,B**). As expected, DNA and cDNA sequences from TS28 were more likely to match TS28 bins while sequences from TS29 were more likely to match TS29 bins. However, in each case sequences were found that mapped more closely to bins from the co-twin's gut microbiome (**Fig. S11C,D**).

Genes were defined as having high (High-Expr) or low (Low-Expr) relative expression based on the ratio of cDNA to DNA relative abundance: i.e. the number of transcripts matching a given gene divided by the total number of mapped transcripts, divided by the number of DNA sequences matching a given gene divided by the total number of mapped gene sequences. A 10-fold difference (natural log ratio=2.3) was chosen as the threshold cutoff based on all pairwise comparisons of technical replicate datasets obtained from DNA or cDNA sequencing of each sample (**Fig. S8A**, n=3-4 replicates per sample per method). The bulk of the ratios from all datasets were found within the cutoff, which was close to the top and bottom 5% of ratios. The distribution of ratios for transcripts was slightly higher between technical replicates, potentially due to noise introduced during sample preparation. The distribution of ratios was significantly different relative to the combined distribution of technical replicates in both biological



comparisons discussed in the text: TS28 cDNA versus TS28 DNA and TS29 cDNA versus TS29 DNA (F-test of variance;  $P < 10^{-3}$ ; **Tables S11,S12**).

Eighteen fecal samples subjected to a shallower depth of microbiome sequencing (including the first sequencing run from the TS28 and TS29 samples prior to their deep sequencing; **Table S1**) were preprocessed and mapped to the 122 gut genomes and/or microbiome bins as described above. Detailed meta-data regarding these samples can be obtained in our previous manuscript (5).

***16S rRNA gene sequence datasets*** - Seven test datasets were used to calibrate noise removal and diversity estimates. The first dataset is referred to as an ‘artificial community’ and was composed of 454 GS FLX pyrosequencing reads from a unequal mixture of DNA from 90 cloned V5 16S rRNA gene sequences amplified from DNA isolated from a lake community (6). The sequences of these clones were also independently determined using the chain terminating method of Sanger. Six additional ‘mock community’ datasets were prepared by mixing DNA extracted from pure cultures of 67 gut bacterial strains in either even (Even1, Even2, Even3) or variable concentrations (Uneven1, Uneven2, Uneven3) (**Table S3**). The 16S rRNA gene sequences of these organisms were either known from existing databases, or determined through PCR amplification and sequencing. All six mock communities were analyzed by V2 16S rRNA gene pyrosequencing, using the same protocol employed for the human fecal samples.

In addition to these datasets, we conducted very deep pyrosequencing of V2 amplicons generated from fecal communities of the TS28 and TS29 co-twins. We also re-analyzed 281 shallow fecal V2 16S rRNA gene datasets from monozygotic (MZ) and

dizygotic (DZ) human twins and their mothers (four samples with <70 sequences were removed after pre-processing) (5), in addition to 814 shallow V2 16S rRNA gene datasets obtained from samples harvested from multiple human body habitats (7).

**Filtering** - Noisy individual bases have been shown to be associated with low quality pyrosequencing reads (8). In addition, noise increases towards the end of the reads. Consequently we terminated all flowgrams at the first noisy signal (defined by an intensity of 0.5-0.7), then removed any flowgrams with length less than 360 flows and subsequently truncated the remaining flowgrams at 360 flows. We also removed any reads that failed to match the primer or barcode sequences. The 'clean' read numbers, after filtering of each dataset are shown in **Table S14**.

**Pyrosequencing noise removal** - To remove pyrosequencing noise, a modified version of the PyroNoise flowgram clustering program was used (6). In this modification, flowgrams were not aligned with each other; instead distances were calculated without alignment. This ensured that only pyrosequencing and not PCR errors were removed. The signal intensity distributions as a function of homopolymer length used to define the distance between flowgrams in this algorithm were calculated from the three 'Even' datasets (**Fig. S12**).

**PCR noise removal** - We used the same principles underlying the PyroNoise algorithm (6) to develop a procedure for removing PCR errors. We began by defining a distance that reflects the probability that a given read  $\mathbf{r}$  could have been generated from a true sequence  $\mathbf{s}$ , given PCR error. This probability is simply the sum of the necessary nucleotide transitions: i.e., the probability that a nucleotide  $m$  is observed when the true nucleotide is  $n$ ,  $P(m|n)$ . The total probability of the read will be the product of these, and

we take the negative logarithm to generate a sequence error corrected distance between zero and infinity. We also normalize by length:

$$d(\mathbf{r}, \mathbf{s}) = -\log[P(\mathbf{r} | \mathbf{s})] / M = -\log\left[\prod_{l=1}^M P(r^l = m | s^l = n)\right] / M = \sum_{l=1}^M -\log[P(r^l = m | s^l = n)] / M$$

This requires alignment of the read to the sequence. Alignment was performed by using a specially modified version of the Needleman-Wunsch algorithm (9) with a reduced gap cost for homopolymer insertion and deletions. This accounted for the possibility of pyrosequencing noise on low frequency reads, which may not have been removed in the flowgram clustering. Gap penalties were included in the distance measure.

The nucleotide transition probabilities were calculated by comparing all reads with pyrosequencing noise removed from the three ‘Even’ datasets (**Table S15**). The error frequency as a function of position along the sequences exhibited a steady background, due to point mutations, with peaks associated with nucleotide polymorphisms; these we tentatively assign to the formation of hetero-duplexes, effectively single nucleotide chimeras.

We assume that the sample can be described as a mixture model, where each component of the mixture corresponds to a true sequence about which observed noisy reads are distributed. The relative weights of each component are the true frequencies of the sequences. The reads are assumed to be distributed as exponentially decaying functions of their sequence error corrected distance from these true sequences. The magnitude of the sequence noise is described by the characteristic length of these exponentials,  $\sigma$ . A maximum likelihood fit of the mixture model can be obtained using an Expectation-Maximization algorithm, initialized using the clusters formed from a

hierarchical clustering of sequences at a given distance cut-off,  $c$ . In this study, we used parameter values of  $\sigma = 0.04$  and  $c = 0.08$  for the V2 16S rRNA datasets but reduced  $\sigma$  to 0.033 for the V5 artificial community which exhibited fewer sequencing errors. A standard gap was given a penalty of 10.0 and a homopolymer gap, 4.0. To quantify the relative importance of pyrosequencing and PCR noise to the formation of phylotypes (operational taxonomic units; OTUs) defined at different levels of sequence identity (%ID), we calculated phylotype number following complete linkage clustering as a function of cut-off for the 'Artificial Community' dataset (**Fig. S13**).

**Chimera removal** - The third source of noise in pyrosequenced amplicons is from PCR chimeras. Chimeras are generated when incomplete extension occurs in one round of PCR and then the resulting sequence fragment acts as a primer for a different sequence in the next round. Consequently chimeras are composed of two (or occasionally more) true sequences with a discrete break point where the transition from one sequence to another occurs. For our 7 test datasets, we were able to determine which sequences were likely chimeras by aligning each sequence against the known reference sequences and finding the putative parents and break point that gave the closest match to the query sequence. We also searched for chimeras comprised of three and four different reference sequences. We did this for the unique sequences remaining following pyrosequencing and PCR noise removal.

If the closest match to a chimera of two sequences was at least three nucleotides or better than that to a single reference sequence, then the query was considered as a possible two-sequence chimera or 'bimera.' Similarly if the match was further improved by three nucleotides when two break points were allowed, it was classified as possibly

comprised of three sequences (a ‘trimera’), and again for the transition to a composite of four sequences (a ‘quadramera’). However, the sequence was only assigned these putative definitions if the absolute match was deemed sufficiently good as measured in terms of the sequence error corrected distance ( $d < 0.15$ ). Otherwise, the sequence was denoted as ‘unclassified’; these could include contaminants, real unidentified 16S rRNA operons, gross pyrosequencing or PCR errors, or most likely a chimera that failed to fall under our rather strict definition.

**Table S16** shows the number of unique sequences remaining following pyrosequencing and PCR noise removal for the 7 test datasets, and the proportion of these sequences that were classified as good, bimeric, trimeric, quadrameric and unclassified. From this, we observe large numbers of bimeras, and substantial numbers of the higher order trimeras. Quadrameras are rare. Unclassified sequences appear in comparable numbers to the good sequences.

We might expect that good sequences are more likely to appear multiple times across technical replicates than chimeric ones. We investigate this for the ‘Uneven’ datasets in **Table S17**, where we give frequencies for the number of times each category of sequence appeared in one, two or three of the samples. We found that the ‘good’ sequences are more likely to be shared; roughly two thirds appear in at least two datasets; this is only true for 5% of the chimeric sequences. The four ‘Unclassified’ sequences that appear in at least two datasets had perfect matches to 16S rRNA sequences in GenBank (*Bacteroides capillosus*, *Acinetobacter* sp., *Lysobacter enzymogenes*, and *Bifidobacterium bifidum*). The *Acinetobacter* and *Lysobacter* should not have been present in the mock community and thus likely represent rare contaminants. The

Bacteroides and Bifidobacterium were probably 16S rRNA genes from the mock gut communities that had not been identified through genomic or full-length 16S rRNA gene sequencing.

For the real datasets we do not have a comprehensive database of known reference sequences and, therefore, it was necessary to develop a method for removing chimeras. To do this, we used the conjecture that both parents of a chimera will be present in the dataset and with a frequency likely to be at least equal to the chimera. The justification for this conjecture is that the parent must experience at least one more PCR round than the chimera that will appear initially as just a single sequence. This ignores the possibility of the chimera experiencing preferential PCR bias over its parents, but it will be true in the vast majority of cases. Thus, we queried each sequence against all those with equal or higher frequency to find the parents and break point with the closest match. We allow for trimeras and quadrameras but only if they increase the match by at least three nucleotides. We then define two indices. The first index of chimericity  $I_c$  - is defined simply as the sequence error corrected distance between the sequence and its best matching chimera. Therefore, the larger this quantity the less likely the sequence is to be a chimera. The second index of evolvability  $I_e$  reflects the probability that the observed chimeric pattern could have evolved. Aligning the query sequence **C**, the closest matching parent **A**, and the more distant parent **B**, we calculate using parsimony the sequence ancestral to all three. We find the number of base pair changes along the three branches to **A**, **B**, **C** and denote these  $x$ ,  $y$ , and  $z$  respectively. We resolve changes to the two parts of alignment, either the part of the chimera matching parent **A** or parent **B**, and denote these  $x^A$  and  $x^B$ ,  $y^A$  and  $y^B$ , and  $z^A$  and  $z^B$ . For a given chimera to be observed, three

independent events must occur; changes to the distant parent **B** must occur on that part of the alignment matching **A**. Assuming all base changes are equally likely, the distribution of changes across the two parts will be binomial distributed with probability proportional to the size of each part. Therefore, we can calculate the probability of the changes being as biased or more so than were observed. The same arguments apply for the changes to the closer parent: they should all lie in the part matching the more distant and we can calculate that probability. Finally we also require that changes do not occur along the branch to the chimera itself. Assuming that a change is equally likely to occur on the branch leading to **B** as to **C**, then this too will be binomially distributed with probability 0.5. We then multiply the three probabilities together and take the negative log to obtain an index that will increase the less likely a chimeric pattern is to have evolved. This index is defined for two parent chimeras (our ‘bimeras’); it can be extended to higher order chimeras but we did not do this, finding that it sufficed for identifying these anyway.

The problem of identifying chimeras is an example of supervised learning. For the three ‘Even’ datasets, we calculated the two indices of chimericity and evolvability for each sequence and then used the known classifications to either good or chimeric (bimera, trimera or quadramera), determined through comparison with the reference 16S rRNA gene sequences to train a two dimensional logistic regression. We also added to our training dataset the result of taking those reference sequences obtained from genome sequencing, and hence most likely to be non-chimeric, and calculating their indices without regard to sequence frequency: i.e., comparing all sequences to all others. We only trained the classifier for sequences with  $I_c < 0.15$ ; if the index of chimericity  $I_c$  is very large then no good chimeric match was found. Consequently, we classified all

sequences with  $I_c \geq 0.15$  as good sequences. The regression was performed using the R software package. All variables were judged highly significant, with  $\alpha = -1.179$ ,  $\beta = -13.996$ , and  $\gamma = 0.341$ , where the probability of classification to a chimera is given by:

$$P(C) = \frac{1}{1 + \exp(-[\alpha + \beta I_c + \gamma I_e])}$$

The regression itself was also highly significant with the null deviance of 1226.2 on 4608 degrees of freedom reduced to 404.1. Our classification rule was to assign a sequence as chimeric if  $P(C) > 0.5$  which should minimize misclassifications. To validate this classifier, we applied it to the four other datasets not used to parameterize the logistic regression (**Table S18**). From this we saw that we achieved a remarkably high sensitivity, successfully detecting over 98% of bimeric sequences and at least 95% of the trimeras. The frequency of quadrameras was too low to properly evaluate. The false positive rate was also relatively low with ~10% of good sequences being falsely judged chimeric.

So far, to determine chimericity we have only used sequence information implicitly by restricting potential parents to having at least the same abundance as the query. However, a sequence with low frequency is more likely to be a chimera than a sequence with high frequency, something we verified by direct examination of those sequences classified through comparison with the known references. As we expect, this is also true of the results of our classifier although less perfectly because of misclassifications. We illustrate this for the 'Uneven1' data in **Fig. S14** where frequency-abundance distributions for those sequences judged to be either good or chimeric types are shown. The chimeric sequences clearly have a different distribution to the good and this is something we can use to improve our classifier. We began by assuming that the indices  $I_c$  and  $I_e$  are distributed independently of abundance, an approach similar in



principle to that used in a ‘naïve Bayes classifier’ (10). The probability that a sequence  $i$  is chimeric given its abundance  $n$  is then:

$$P(C,n) = \frac{P(C)P(n|C)}{P(C)P(n|C) + (1 - P(C))P(n|G)}$$

where  $P(C)$  is our probability of chimericity independent of  $n$  taken from the logistic regression, and  $P(n|C)$  and  $P(n|G)$  are the probabilities of observing a sequence in the sample  $n$  times if it is ‘chimeric’ or ‘good’, respectively. To calculate these quantities we extended an existing method for fitting abundance distributions that accounts for sampling noise (11). We fitted an abundance distribution to those sequences classified as good using maximum likelihood obtaining parameters  $\theta_g$ , and a separate distribution to those classified chimeric with parameters  $\theta_c$ . We can then calculate for each distribution the probability that an arbitrary sequence would appear  $n$  times in the sample. These are approximately compound-Poisson distributions and we denote them  $P_n(\theta)$ . Since we are only interested in observed sequences, we normalized this by the probability that we will observe the sequence,  $P_n(\theta) = P_n(\theta)/(1 - P_0(\theta))$ . To obtain self-consistent estimates for the  $P(C, n)$ , and parameters,  $\theta_c$ ,  $\theta_g$ , we then repeated this process, classifying sequences as chimeric if  $P(C,n) > 0.5$  and recalculating the distributions. We iterated this until we got convergence to improved probabilities  $P(C,n)$  that account for sequence abundance. We used a log-normal distribution for fitting the abundance distributions but the algorithm is not sensitive to this choice. In **Fig. S14** we show the final fitted distributions and distributions of good and chimeric sequences after incorporating the abundance information. The application of this algorithm to the four validation datasets is shown in **Table S19**. In all four cases incorporating abundance information improved classification

resulting in very high accuracies. Therefore, we incorporated sequence abundances into the chimera detection protocol used in this study.

***Diversity estimates in the 'Uneven' mock communities*** - Following noise removal and chimera detection using abundance information, fairly flat rarefaction curves were obtained for the three Uneven mock communities (**Fig. S15**), suggesting we had been successful in removing most of the noise. The total 97%ID phylotype richness of the V2 16S rRNA control sequences was 62. The observed 97%ID phylotype richness in 'Uneven1' exceeded this figure slightly probably due to contaminants, unidentified 16S rRNA operons in the mock community, and/or some chimeras that were not identified. In 'Uneven2' and 'Uneven3', the diversity was slightly less. Under-estimation of richness could occur through a combination of false positive chimera classification and PCR amplification bias. Estimates of total diversity in these validation data-sets using both non-parametric, Chao, and parametric diversity estimators (fitting log-normal and Sichel distributions (11) are shown in **Table S20**. These values tended to somewhat but not dramatically over-estimate the true diversity with the range of possible values for the parametric estimators including some quite reasonable estimates. This gave us confidence in applying our noise removal and diversity estimation procedures to real datasets.

***Accuracy of phylotype construction in the test datasets*** - To test the accuracy of our noise and chimera removal algorithms, we constructed phylotypes from both the de-noised reads and from the known reference sequences for the 'Artificial Community.' We used a complete linkage hierarchical clustering with sequence distances derived from pairwise alignments to form the phylotypes. At increasing sequence differences, we then counted the number of phylotypes that were comprised of both pyrosequencing reads and

the known reference sequences. These can be considered ‘true phylotypes’ that have been detected. The number of phylotypes that only contain reference sequences correspond to phylotypes that have been missed, and phylotypes composed only of pyrosequencing reads comprise noise (**Fig. S16**). At 97%ID no phylotypes were missed and just two false phylotypes were present, consisting of unidentified chimeras each comprising a single read.

For the ‘Artificial Community’ composed of cloned 16S rRNA gene amplicons, we can compare the observed phylotypes relative abundances after de-noising with their relative concentration in the mixture. In this case, because all clones had sequences that were perfect matches to the V5 primers we used, there was a strong correlation ( $R^2 = 0.96$ ) between observed abundance and concentrations (**Fig. S17**). This was not true for the ‘mock community’ datasets that contained DNA extracted from real organisms. In this case substantial variation in abundance was observed even for the ‘Even’ datasets where the organisms were mixed in equal abundances (**Fig. S4**). The deviation in relative abundance from expected is large for many of the phylotypes in the mock community, potentially due to a combination of primer bias (multiple mismatches in many of the *Bifidobacterium*, see **Fig. S4A**), differences in DNA quality, differences in 16S rRNA copy number (which showed a poor correlation to abundance, although the copy number data is largely incomplete due to the quality of each draft genome, data not shown), and possibly differences in genomic copy number (12). These results emphasize the need for new methods to enable accurate quantification of bacteria from complex communities at the level of cell count, as opposed to 16S rRNA copy number or gene content.

We can calculate the accuracy of phylotype construction for the mock communities following de-noising and chimera removal just as we did for the ‘Artificial Community.’ We show these accuracies for the ‘Uneven1’ dataset in **Fig. S18**. In this case we have to account for the possibility that some reference sequences may not be present in the pyrosequencing reads because of primer bias. We did this by only including those reference sequences in our comparison that had a non-zero number of raw filtered reads matching to within 2% nucleotide sequence difference. While the number of true phylotypes missed is still low at higher cut-offs (at 97%ID just one is missed), there are more false phylotypes than were found for the ‘Artificial Community’ (22 in total at the 97% cutoff). These phylotypes must be derived from chimeric and unclassified de-noised sequences that were judged to be good in **Table S19**. Most of these are singletons but a few are more frequent and have good matches in GenBank; as discussed above these are either contaminants or true 16S rRNA genes from the reference organisms that were not included in our collection of reference sequences.

***Diversity estimates and phylotype overlaps in experimental datasets*** - In **Table S21**, we show chimera numbers at 50% classification cut-off (see above) incorporating sequence abundance information for the deeply sampled twins’ fecal V2 16S rRNA datasets (TS28-Deep; TS29-Deep). The rarefaction curves for 97%ID phylotypes built with non-chimeric sequences are shown in **Fig. 1A**. To verify that the high chimera identification rates were not simply an effect of the large sample sizes we applied the noise removal algorithms to two shallow sequenced V2 sequence datasets from the same fecal samples (5). These are also shown in **Table S21** and the 97%ID phylotype rarefaction curves in **Fig. S19**. The curves from the shallow datasets initially reproduce

those from the deeply sequenced datasets but slightly over estimate diversity at larger sample sizes. This suggests that some noise in the low abundance phylotypes is not being removed from the shallow datasets, a conclusion that is supported by the 97%ID phylotype overlaps presented in **Table S22**. The 95%ID phylotype overlaps are given in **Table S23**.

*Normalized overlap* - We would expect all of the phylotypes found in the shallow datasets to appear in the corresponding large dataset; the fact that only about 90% are found indicates that ~10% of phylotypes in the shallow datasets either should have been removed and were not, or have been falsely removed from the larger datasets.

Additionally, the figures for the deep sequenced samples in **Tables S22,S23** do not give a true estimate of the proportion of phylotypes present in one twin that are also found in the other. This is because they do not take account of the fact that a given phylotype may be present, but at an abundance too low to be seen even in these very large datasets. **Fig. S20** shows the distribution of shared 97%ID phylotype frequencies in TS29 relative to TS28; while shared phylotype abundances vary significantly in the fecal communities of the co-twins, this is rarely by more than two orders of magnitude; in fact this is true of 95% of shared phylotypes. Consequently, as noted in the main text, we can define a normalized overlap between the samples by only considering phylotypes that have a relative frequency sufficiently large that if they appear with a frequency 100 times less in the other sample we would still expect to see at least five copies of them (the latter being a number large enough that random sampling effects can be ignored). This is true of 68 97%ID phylotypes in TS28 fecal sample and 46 of these appear in TS29. The normalized overlap is thus 46/68 or 68%. Similarly of the 65 97%ID phylotypes in TS29 that satisfy

this criterion, 51 appear in TS28 giving an overlap of 79%. For 95%ID phylotypes, the normalized overlaps are 46/60 (76.7%) and 49/57 (86%) for TS28 phylotypes in TS29 and *vice versa*, respectively. Accounting for differences in relative frequency and sampling, reveals that while the phylotype overlaps between these genetically identical co-twins are quite substantial, a significant proportion of phylotypes do not co-occur.

**Larger cohort** - To determine if this observation holds across a larger cohort of sampled fecal bacterial communities, we de-noised all 281 fecal V2 16S rRNA gene sequence datasets (277 samples were retained after pre-processing) and 814 samples from 27 body habitats (see the *16S rRNA gene sequence datasets* section above). Following chimera removal, we built 97%ID phylotypes using complete linkage and associated each phylotype with its most abundant sequence. We then aligned each of these sequences in turn against the 97%ID phylotypes in the two ‘Deep Twins’ datasets and calculated the proportion that had a closest match with less than 3% nucleotide difference. Because almost all these samples were at least two orders of magnitude less than the ‘Deep Twins’ datasets (the largest had 10,989 reads, but the median size was 1,670), we did not need to normalize overlap as above. In **Fig. 1C**, we show these samples with the TS29 overlap plotted on the y-axis and the TS28 overlap on the x-axis. There is a large range of overlaps (20-60%) and the overlaps are correlated, probably because TS28 and TS29 themselves are more similar than most other fecal community samples. We repeated this for the 814 ‘Whole Body’ samples; the overlaps were significantly reduced in the samples from the rest of the body (see **Fig. 1C** and the main text).

To investigate the phylotype diversity in the gut microbiomes of the population as a whole, we took the 250 ‘Shallow Twins’ (TSAll-Shallow) de-noised samples with at

least a 1,000 reads. We then subsampled these to 1,000 reads to produce a dataset of 250,000 reads evenly distributed among 250 samples from 146 individuals. We then applied an extra de-noising step to the complete dataset; this step consisted of forming clusters after an average linkage clustering using our sequence error corrected distances at a cut-off of 0.10. This cut-off will correspond to ~1% nucleotide sequence difference. The purpose of this step was to remove noise from those sequences that might be common in one sample but rare and hence potentially noisy in another. We then used these sequences to build phylotypes following a complete linkage clustering. In **Figs. 1B,S21**, we show the rarefaction curves for 97%ID phylotypes and 95%ID phylotypes respectively in these 250 samples and for comparison the deeply sequenced TS28 and TS29 datasets.

*Contribution of chimeras to diversity* - As we mention above, chimera removal in these ‘Shallow Twins’ datasets will not be perfect. We can estimate for TS28 and TS29 how many 97%ID phylotypes are attributable to chimeras by searching their most abundant sequences against the corresponding ‘Deep Twins’ dataset. If we do this prior to removing chimeras from the ‘Deep Twins’ data then any phylotype from the shallow dataset that does not have a match must be chimeric; since the chimera co-occurrence frequency in **Table S17** is about 5%, this will reveal the majority of remaining chimeras. For both TS28 and TS29, four chimeric phylotypes are found in the shallow datasets. This is a small contribution to the per sample diversity but over 250 datasets, since each chimeric phylotype is likely to be novel, it could contribute up to a 1,000 false phylotypes. To account for this and to obtain a lower bound on the total population diversity we applied an alternative chimera removal procedure, eliminating all de-noised

sequences that did not appear in more than one of the ‘Shallow Twins’ datasets. This will remove some genuine variation and may even miss some chimeras but it gives us something to compare with the results above. We then subsampled the same 250 datasets to 1,000 reads again and built phylotypes. The resulting 97%ID and 95%ID phylotype rarefaction curves are also shown in **Figs. 1B,S21**. The diversities observed in these co-occurring sequences are considerably reduced but they are still larger than in the individual ‘Deep Twins’ samples. This is a consequence of the less than complete phylotype overlaps between individuals. There is a much higher total diversity from the population than within a single individual at the same level of sampling for human fecal microbiota.

The degree to which the individual phylotypes are spread across the 250 ‘Shallow Twins’ samples varies greatly (**Fig. 1C**). In **Fig. 1D** we plot the relative abundance of each phylotype in the whole dataset against the proportion of samples in which it was observed (phylotypes were constructed after removing all putative chimeric sequences that only appeared once, see above). If the phylotypes were evenly spread across all samples, we would not expect them to appear in every sample due to random chance. This will also be a function of abundance: a relative abundance of 0.1% would result in a mean of 1 sequence per sample: since we have 250 samples and a total sample size of 250,000, the expected occupancy would be 63%. To investigate this, we used a sampling approach: at each observed abundance level we generated a null dataset assuming that each read in an phylotype was equally likely to come from any sample and calculated the proportion of samples the phylotype appeared in. We repeated this for 1,000 replicates and generated medians and 95% confidence intervals (**Fig. 1D**). The observed



occupancies fall below these null values at all relative abundances indicating that phylotypes are more aggregated than we would expect by chance. Occupancies generally increased with relative abundance but at a given relative abundance there is a great deal of variation in occupancy, indicating that some phylotypes are intrinsically more cosmopolitan than others.

To investigate the effect of sampling throughout the human body on observed phylotype numbers, we generated phylotypes for 250 samples randomly chosen from the 515 ‘Whole Body’ samples that had more than a 1,000 reads. These datasets were then de-noised, chimeras were removed, and the datasets were subsampled to 1,000 reads just as for the ‘Shallow Twins’ fecal datasets. The resulting rarefaction curves are also shown in **Figs. 1B,S21**. This pre-processed ‘Whole Body’ dataset gives the highest observed diversities at all levels of sampling: i.e., diversity is maximized by sampling from different individuals and from different body habitats.

We then calculated the observed phylotype numbers for all the datasets (**Table 1**). The true number of phylotypes will be larger than this because of sampling limitations. Therefore, we also calculated Chao’s estimate of the true diversity for each of the samples (13). This is a non-parametric estimator that requires no assumption regarding the form of the underlying abundance distribution. However, it strictly only gives a lower bound on diversity, and is highly sensitive to small sample sizes. This explains why Chao’s estimator increases dramatically from the shallowly sequenced samples (TS28-Shallow, TS29-Shallow) to the equivalent deeply sequenced samples (‘Deep Twins’, TS28-Deep, TS29-Deep) (**Table 1**).

Parametric diversity estimators are more robust to sample size and potentially give a better indication of the unseen diversity, but they are sensitive to the assumed form of the abundance distribution (14). The very large ‘Deep Twins’ datasets provided us with an opportunity to determine what form the abundance distribution takes in individual human fecal microbial communities. We used a Bayesian method to fit four different abundance distributions to the ‘Deep Twins’ samples, and to the two corresponding ‘Shallow Twins’ datasets (11). The log-normal and Inverse-Gaussian distributions (both two-parameter) were used, as well as their three-parameter generalizations (log-Student’s t and Sichel distributions). These distributions have been shown to be effective at fitting microbial taxa abundances (11). One hundred thousand Monte Carlo samples were generated from the posterior distribution by a Metropolis algorithm. The first 25,000 samples were then discarded as a burn-in period and all results quoted calculated over the last 75,000. We used the Deviance Information Criterion (DIC) to determine goodness of fit. This accounts automatically for parameter number and the smaller the DIC the better the fit. In **Tables S24,S25**, we give DIC values for the four fits to the 97%ID and 95%ID phylotype abundance distributions for individual fecal samples. For the two shallow datasets all four distributions fit equally well reflecting the low level of sampling. For both ‘Deep Twins’ datasets the Sichel distribution fit best, although it was only significantly better than the log-normal for TS28. This was true for both 97%ID and 95%ID phylotypes. Consequently we can tentatively conclude, that the Sichel distribution best describes individual human gut samples.

In **Tables S26, S27**, we give the total number of 97% and 95% phylotypes predicted from fitting these distributions. The DIC values discussed above imply that the results from the Sichel are most dependable. There are two things to note from the tables. *First*, at least for TS28, the shallow dataset predictions overlap those of the ‘Deep Twins’, and they are not dramatically different for TS29, illustrating the robustness of the parametric fits to sample size. *Second*, although the observed diversity is substantially lower in TS29, the total diversity may be similar. Observed diversity is sensitive to the presence of a few highly abundant phylotypes. In TS29 the most abundant 97%ID phylotype comprises 39% of the diversity as opposed to 18% in TS28. Therefore, this phylotype may be skewing the observed diversities even though the total community diversity is similar.

***Additional microbiomes and meta-transcriptomes*** - Five additional samples from two sets of MZ co-twins and one unrelated individual were included (Samples labeled ‘TSDA1-5’ in **Fig. S9**). All of these individuals were lean, born in Missouri, were 23-27 years old, did not have a history of gastrointestinal disease, and had not consumed antibiotics in the 12 months prior to sampling. Sequences were obtained using the 454 GS FLX instrument (DNA) and the Illumina GAIIx instrument (cDNA). On average,  $25,093 \pm 3,357$  DNA and  $316,500 \pm 34,675$  cDNA sequencing reads per sample (mean  $\pm$  s.e.m) matched protein-coding genes from the 122 gut microbial genomes and microbiome bins.

## SUPPORTING TABLES

**Table S1: DNA sequencing statistics.**

|            | Pyrosequencer run designation | 454 GS Platform | Number of nucleotides | Number of sequences | Average sequence length (nt) |
|------------|-------------------------------|-----------------|-----------------------|---------------------|------------------------------|
| 16S rRNA   | TS28 shallow                  | FLX             | 1,564,183             | 6,694               | 234                          |
| 16S rRNA   | TS28 run1                     | FLX             | 118,156,493           | 505,607             | 234                          |
| 16S rRNA   | TS28 run2                     | FLX             | 114,723,622           | 490,496             | 234                          |
| 16S rRNA   | TS28 run3                     | FLX             | 114,073,518           | 497,968             | 229                          |
| 16S rRNA   | TS28 total                    | FLX             | 348,517,816           | 1,500,765           | 232                          |
|            |                               |                 |                       |                     |                              |
| Single-end | TS28 run1                     | Titanium        | 138,364,927           | 399,717             | 346                          |
| Single-end | TS28 run2                     | Titanium        | 313,831,777           | 1,301,031           | 241                          |
| Single-end | TS28 run3                     | Titanium        | 587,766,394           | 1,430,201           | 411                          |
| Single-end | TS28 run4                     | Titanium        | 528,420,892           | 1,279,604           | 413                          |
| Paired-end | TS28 run5                     | Titanium        | 311,918,140           | 960,050             | 325                          |
| Paired-end | TS28 run6                     | Titanium        | 292,301,943           | 920,894             | 317                          |
|            | TS28 total                    | Titanium        | 2,172,604,073         | 6,291,497           | 345                          |
|            |                               |                 |                       |                     |                              |
| 16S rRNA   | TS29 shallow                  | FLX             | 556,046               | 2,411               | 231                          |
| 16S rRNA   | TS29 run1                     | FLX             | 60,095,930            | 275,066             | 218                          |
| 16S rRNA   | TS29 run2                     | FLX             | 114,039,159           | 478,796             | 238                          |
| 16S rRNA   | TS29 run3                     | FLX             | 103,067,369           | 430,287             | 240                          |
| 16S rRNA   | TS29 total                    | FLX             | 277,758,504           | 1,186,560           | 234                          |
|            |                               |                 |                       |                     |                              |
| Single-end | TS29 run1                     | Titanium        | 239,971,702           | 672,196             | 357                          |
| Single-end | TS29 run2                     | Titanium        | 387,493,057           | 1,096,053           | 354                          |
| Single-end | TS29 run3                     | Titanium        | 531,122,832           | 1,438,709           | 369                          |
| Paired-end | TS29 run4                     | Titanium        | 222,933,173           | 634,861             | 351                          |
|            | TS29 total                    | Titanium        | 1,381,520,764         | 3,841,819           | 360                          |

**Table S2: cDNA sequencing statistics (values represent the number or percentage of sequencing reads assigned to each category).**

| <b>Sample</b>                           | <b>TS28<br/>run1</b> | <b>TS28<br/>run2</b> | <b>TS28<br/>run3</b> | <b>TS29<br/>run1</b> | <b>TS29<br/>run2</b> | <b>TS29<br/>run3</b> | <b>TOTAL</b> |
|-----------------------------------------|----------------------|----------------------|----------------------|----------------------|----------------------|----------------------|--------------|
| <b>Non-adapter sequences</b>            | 4,817,384            | 7,265,680            | 3,348,023            | 1,215,083            | 3,569,577            | 2,253,015            | 22,468,762   |
| <b>16S sequences</b>                    | 1,460,662            | 2,208,065            | 169,460              | 271,628              | 907,464              | 140,324              | 5,157,603    |
| <b>23S sequences</b>                    | 2,489,579            | 3,762,454            | 2,534,858            | 700,801              | 1,880,230            | 1,763,104            | 13,131,026   |
| <b>5S sequences</b>                     | 17,150               | 25,140               | 932                  | 17,295               | 108,870              | 757                  | 170,144      |
| <b>CDS</b>                              | 181,986              | 275,795              | 154,189              | 85,871               | 180,933              | 73,604               | 952,378      |
| <b>Intergenic sequences<sup>a</sup></b> | 8,179                | 11,978               | 3,928                | 1,418                | 2,368                | 700                  | 28,571       |
| <b>tRNA sequences</b>                   | 509                  | 850                  | 135                  | 1,117                | 1,013                | 90                   | 3,714        |
| <b>Mapped sequences</b>                 | 4,158,065            | 6,284,282            | 2,863,502            | 1,078,130            | 3,080,878            | 1,978,579            | 19,443,436   |
| <b>Unmapped sequences</b>               | 659,319              | 981,398              | 484,521              | 136,953              | 488,699              | 274,436              | 3,025,326    |
| <b>% of sequences mapped</b>            | 86.31                | 86.49                | 85.53                | 88.73                | 86.31                | 87.82                | -            |
| <b>% of mapped from CDS</b>             | 4.38                 | 4.39                 | 5.38                 | 7.96                 | 5.87                 | 3.72                 | -            |
| <b>% of sequences unmapped</b>          | 13.69                | 13.51                | 14.47                | 11.27                | 13.69                | 12.18                | -            |

<sup>a</sup>Intergenic sequences include matches to genes with no predicted coding sequence and matches to miscellaneous noncoding RNAs.

**Table S3: Percentage of purified genomic DNA added to control ‘mock community’ pools for 16S rRNA gene sequencing.**

| Isolate | Taxonomy                                                | Even1 | Even2 | Even3 | Uneven1  | Uneven2  | Uneven3  |
|---------|---------------------------------------------------------|-------|-------|-------|----------|----------|----------|
| 1       | Actinobacteria;<br>Bifidobacterium adolescentis         | 1.47  | 1.47  | 1.47  | 5.13E-02 | 1.03E-01 | 1.03E-04 |
| 2       | Actinobacteria;<br>Bifidobacterium angulatum            | 1.47  | 1.47  | 1.47  | 1.03E+01 | 5.13E-04 | 1.03E-01 |
| 3       | Actinobacteria;<br>Bifidobacterium bifidum              | 1.47  | 1.47  | 1.47  | 5.13E-01 | 1.03E-01 | 5.13E+00 |
| 4       | Actinobacteria;<br>Bifidobacterium breve                | 1.47  | 1.47  | 1.47  | 5.13E-03 | 5.13E-02 | 1.03E-02 |
| 5       | Actinobacteria;<br>Bifidobacterium gallicum             | 1.47  | 1.47  | 1.47  | 1.03E+01 | 5.13E-04 | 1.03E-04 |
| 6       | Actinobacteria;<br>Bifidobacterium catenulatum          | 1.47  | 1.47  | 1.47  | 1.03E-03 | 2.57E+00 | 1.03E+01 |
| 7       | Actinobacteria;<br>Bifidobacterium dentium              | 1.47  | 1.47  | 1.47  | 2.57E-01 | 5.13E-03 | 1.03E-01 |
| 8       | Actinobacteria;<br>Bifidobacterium<br>pseudocatenulatum | 1.47  | 1.47  | 1.47  | 1.03E-01 | 5.13E-02 | 1.03E-01 |
| 9       | Actinobacteria; Collinsella<br>intestinalis             | 1.47  | 1.47  | 1.47  | 1.03E-01 | 1.03E-01 | 1.03E-04 |
| 10      | Actinobacteria; Collinsella<br>stercoris                | 1.47  | 1.47  | 1.47  | 1.03E-04 | 1.03E+01 | 1.03E-03 |
| 11      | Bacteroidetes; Alistipes<br>putredinis                  | 1.47  | 1.47  | 1.47  | 2.57E-01 | 5.13E-04 | 5.13E-03 |
| 12      | Bacteroidetes; Bacteroides<br>pectinophilus             | 1.47  | 1.47  | 1.47  | 5.13E-03 | 1.03E-03 | 5.13E-03 |
| 13      | Bacteroidetes; Bacteroides<br>coprocola                 | 1.47  | 1.47  | 1.47  | 2.57E+00 | 2.57E-01 | 5.13E-01 |
| 14      | Bacteroidetes; Bacteroides<br>coprophilus               | 1.47  | 1.47  | 1.47  | 5.13E-02 | 1.03E+01 | 5.13E-04 |
| 15      | Bacteroidetes; Bacteroides<br>dorei                     | 1.47  | 1.47  | 1.47  | 5.13E-04 | 2.57E-01 | 1.03E-02 |
| 16      | Bacteroidetes; Bacteroides<br>eggerthii                 | 1.47  | 1.47  | 1.47  | 1.03E+00 | 1.03E-02 | 1.03E-01 |
| 17      | Bacteroidetes; Bacteroides<br>finegoldii                | 1.47  | 1.47  | 1.47  | 1.03E-02 | 1.03E+00 | 1.03E-03 |
| 18      | Bacteroidetes; Bacteroides<br>intestinalis              | 1.47  | 1.47  | 1.47  | 5.13E-04 | 1.03E+01 | 5.13E-04 |
| 19      | Bacteroidetes; Bacteroides<br>plebeius                  | 1.47  | 1.47  | 1.47  | 5.13E-01 | 5.13E-04 | 1.03E-04 |
| 20      | Bacteroidetes; Bacteroides<br>caccae                    | 1.47  | 1.47  | 1.47  | 5.13E-03 | 1.03E-04 | 1.03E+01 |
| 21      | Bacteroidetes; Bacteroides<br>cellulosilyticus          | 1.47  | 1.47  | 1.47  | 1.03E-04 | 1.03E-01 | 5.13E+00 |
| 22      | Bacteroidetes; Bacteroides<br>ovatus                    | 1.47  | 1.47  | 1.47  | 2.57E-01 | 5.13E-03 | 5.13E-02 |
| 23      | Bacteroidetes; Bacteroides<br>stercoris                 | 1.47  | 1.47  | 1.47  | 5.13E-03 | 1.03E-04 | 5.13E-03 |
| 24      | Bacteroidetes; Parabacteroides<br>johnsonii             | 1.47  | 1.47  | 1.47  | 5.13E-04 | 2.57E-01 | 1.03E-02 |
| 25      | Bacteroidetes; Prevotella copri                         | 1.47  | 1.47  | 1.47  | 5.13E+00 | 2.57E+00 | 5.13E-02 |

|    |                                                 |      |      |      |          |          |          |
|----|-------------------------------------------------|------|------|------|----------|----------|----------|
| 26 | Firmicutes; Anaerococcus hydrogenalis           | 1.47 | 1.47 | 1.47 | 1.03E-01 | 2.57E-01 | 1.03E+00 |
| 27 | Firmicutes; Anaerofustis stercorihominis        | 1.47 | 1.47 | 1.47 | 1.03E-01 | 1.03E-03 | 5.13E+00 |
| 28 | Firmicutes; Anaerotruncus colihominis           | 1.47 | 1.47 | 1.47 | 1.03E-03 | 5.13E-04 | 1.03E-03 |
| 29 | Firmicutes; Butyrivibrio crossotus              | 1.47 | 1.47 | 1.47 | 1.03E+00 | 1.03E-04 | 1.03E-02 |
| 30 | Firmicutes; Catenibacterium mitsuokai           | 2.94 | 2.94 | 2.94 | 7.70E-01 | 3.59E+00 | 5.24E+00 |
| 31 | Firmicutes; Clostridium sporogenes              | 1.47 | 1.47 | 1.47 | 2.57E+00 | 5.13E+00 | 5.13E-01 |
| 32 | Firmicutes; Clostridium asparagiforme           | 1.47 | 1.47 | 1.47 | 1.03E-04 | 2.57E-01 | 5.13E-03 |
| 33 | Firmicutes; Clostridium bartlettii              | 1.47 | 1.47 | 1.47 | 1.03E+00 | 1.03E-03 | 5.13E-01 |
| 34 | Firmicutes; Clostridium celatum                 | 1.47 | 1.47 | 1.47 | 5.13E-04 | 5.13E-01 | 2.57E+00 |
| 35 | Firmicutes; Clostridium hathewayi               | 1.47 | 1.47 | 1.47 | 5.13E-02 | 1.03E+00 | 5.13E-02 |
| 36 | Firmicutes; Clostridium hiranonis               | 1.47 | 1.47 | 1.47 | 1.03E-03 | 2.57E+00 | 5.13E-01 |
| 37 | Firmicutes; Clostridium hylemonae               | 1.47 | 1.47 | 1.47 | 1.03E-01 | 5.13E-02 | 1.03E-01 |
| 38 | Firmicutes; Clostridium methylpentosum          | 1.47 | 1.47 | 1.47 | 2.57E-01 | 1.03E-02 | 5.13E-04 |
| 39 | Firmicutes; Clostridium nexile                  | 1.47 | 1.47 | 1.47 | 1.03E-04 | 5.13E-01 | 1.03E-03 |
| 40 | Firmicutes; Clostridium orbiscindens            | 1.47 | 1.47 | 1.47 | 5.13E+00 | 1.03E-01 | 2.57E-01 |
| 41 | Firmicutes; Clostridium ramosum                 | 1.47 | 1.47 | 1.47 | 2.57E+00 | 1.03E+00 | 1.03E-04 |
| 42 | Firmicutes; Clostridium saccharolyticum-related | 1.47 | 1.47 | 1.47 | 5.13E+00 | 1.03E-03 | 2.57E+00 |
| 43 | Firmicutes; Coprococcus comes                   | 1.47 | 1.47 | 1.47 | 1.03E-01 | 1.03E+00 | 5.13E-02 |
| 44 | Firmicutes; Dorea formicigenerans               | 1.47 | 1.47 | 1.47 | 1.03E-01 | 5.13E+00 | 5.13E-01 |
| 45 | Firmicutes; Eubacterium bifforme                | 1.47 | 1.47 | 1.47 | 5.13E-02 | 1.03E-01 | 2.57E-01 |
| 46 | Firmicutes; Eubacterium ramulus                 | 1.47 | 1.47 | 1.47 | 1.03E+01 | 1.03E+01 | 1.03E+01 |
| 47 | Firmicutes; Holdemania filiformis               | 1.47 | 1.47 | 1.47 | 5.13E+00 | 5.13E-01 | 5.13E+00 |
| 48 | Firmicutes; Mitsuokella multacida               | 1.47 | 1.47 | 1.47 | 5.13E+00 | 1.03E+01 | 1.03E+00 |
| 49 | Firmicutes; Roseburia faecis                    | 1.47 | 1.47 | 1.47 | 5.13E-01 | 1.03E-02 | 1.03E-02 |
| 50 | Firmicutes; Roseburia intestinalis              | 1.47 | 1.47 | 1.47 | 1.03E+01 | 1.03E-04 | 5.13E-04 |
| 51 | Firmicutes; Roseburia inulinivorans             | 1.47 | 1.47 | 1.47 | 1.03E+00 | 5.13E+00 | 1.03E-01 |
| 52 | Firmicutes; Ruminococcus hansenii               | 1.47 | 1.47 | 1.47 | 5.13E-03 | 5.13E-03 | 5.13E-02 |
| 53 | Firmicutes; Ruminococcus torques                | 1.47 | 1.47 | 1.47 | 1.03E-03 | 5.13E+00 | 5.13E-04 |

|    |                                              |      |      |      |          |          |          |
|----|----------------------------------------------|------|------|------|----------|----------|----------|
| 54 | Firmicutes; Ruminococcus gnavus-related      | 1.47 | 1.47 | 1.47 | 2.57E+00 | 1.03E-04 | 1.03E-01 |
| 55 | Firmicutes; Ruminococcus lactaris            | 1.47 | 1.47 | 1.47 | 1.03E-02 | 1.03E-01 | 1.03E-03 |
| 56 | Firmicutes; Streptococcus infantarius        | 1.47 | 1.47 | 1.47 | 5.13E-01 | 5.13E-01 | 1.03E+00 |
| 57 | Firmicutes; Subdoligranulum variabile        | 1.47 | 1.47 | 1.47 | 1.03E-03 | 1.03E-01 | 5.13E-03 |
| 58 | Proteobacteria; Providencia rustigianii      | 1.47 | 1.47 | 1.47 | 5.13E-04 | 5.13E-03 | 2.57E-01 |
| 59 | Proteobacteria; Cedecea davisae              | 1.47 | 1.47 | 1.47 | 1.03E-01 | 1.03E-02 | 1.03E+00 |
| 60 | Proteobacteria; Citrobacter sp.              | 1.47 | 1.47 | 1.47 | 1.03E+01 | 5.13E-03 | 2.57E+00 |
| 61 | Proteobacteria; Desulfitobacterium hafniense | 1.47 | 1.47 | 1.47 | 1.03E-04 | 5.13E-01 | 1.03E+01 |
| 62 | Proteobacteria; Edwardsiella tarda           | 1.47 | 1.47 | 1.47 | 1.03E-02 | 5.13E-02 | 1.03E+00 |
| 63 | Proteobacteria; Enterobacter cancerogenus    | 1.47 | 1.47 | 1.47 | 1.03E-02 | 5.13E-02 | 2.57E+00 |
| 64 | Proteobacteria; Proteus penneri              | 1.47 | 1.47 | 1.47 | 2.57E+00 | 1.03E-03 | 2.57E-01 |
| 65 | Proteobacteria; Providencia alcalifaciens    | 1.47 | 1.47 | 1.47 | 1.03E+00 | 2.57E+00 | 1.03E+01 |
| 66 | Proteobacteria; Providencia rettgeri         | 1.47 | 1.47 | 1.47 | 1.03E-02 | 1.03E-02 | 2.57E-01 |
| 67 | Proteobacteria; Providencia stuartii         | 1.47 | 1.47 | 1.47 | 5.13E-02 | 5.13E+00 | 2.57E+00 |



**Table S4: Observed and total diversity estimates of 97%ID phylotypes for the ‘Deep twins’ TS28 and TS29 datasets.**

| Dataset      | Size    | Phylotypes | Chao  | Log-normal              | Sichel                  |
|--------------|---------|------------|-------|-------------------------|-------------------------|
| TS28-Deep    | 848,512 | 473        | 626.5 | 919; <b>1373</b> ;2926  | 724; <b>878</b> ;1686** |
| TS29-Deep    | 553,416 | 344        | 557.8 | 874; <b>1787</b> ;7015  | 577; <b>768</b> ;1812*  |
| TS28-Shallow | 3,288   | 135        | 375.3 | 537; <b>2119</b> ;8803  | 242; <b>386</b> ;830*   |
| TS29-Shallow | 1,178   | 81         | 127.3 | 364; <b>1920</b> ;9664* | 134; <b>209</b> ;457    |

*Legend* - The results from fitting the log-normal and Sichel distributions are **medians** with 95% confidence intervals from the posterior distribution (11).\*\* indicates a significantly better fit while \* indicates a non-significantly better fit to the log-normal or Sichel distribution.

**Table S5: Assembly of the gut microbiome.**

|                                         | TS28        | TS29        |
|-----------------------------------------|-------------|-------------|
| <b>Reads assembled</b>                  | 5,881,372   | 3,560,194   |
| <b>Reads partially assembled</b>        | 377,943     | 307,154     |
| <b>Singleton reads</b>                  | 345,834     | 256,003     |
| <b>Repeat reads</b>                     | 377,903     | 186,308     |
| <b>Outlier reads</b>                    | 59,549      | 30,398      |
| <b>%Reads assembled</b>                 | 83.51       | 82.03       |
| <b>Total number reads</b>               | 7,042,601   | 4,340,057   |
|                                         |             |             |
| <b>Number large contigs<sup>a</sup></b> | 92,104      | 61,460      |
| <b>Bases in large contigs</b>           | 152,096,866 | 96,081,634  |
| <b>Average large contig size</b>        | 1,651       | 1,563       |
| <b>N50 large contig size</b>            | 2,448       | 2,055       |
| <b>Largest contig size</b>              | 514,016     | 571,641     |
|                                         |             |             |
| <b>Total number of contigs</b>          | 205,019     | 144,376     |
| <b>Total bases in contigs</b>           | 189,049,946 | 123,910,240 |
|                                         |             |             |
| <b>Number of scaffolds</b>              | 11,780      | 6,392       |
| <b>Number of bases</b>                  | 99,989,509  | 61,353,614  |
| <b>Average scaffold size</b>            | 8,488       | 9,598       |
| <b>N50 scaffold size</b>                | 15,510      | 20,555      |
| <b>Largest scaffold size</b>            | 1,243,730   | 1,626,224   |

<sup>a</sup>Large contigs defined as >500bp.

**Table S6: PhyloPythia binning results (family- and genus-level).**

| Bin                                          | Number of scaffolds |       | Size of scaffolds (bp) |            | Number of genes in bin |        |
|----------------------------------------------|---------------------|-------|------------------------|------------|------------------------|--------|
|                                              | TS28                | TS29  | TS28                   | TS29       | TS28                   | TS29   |
| Ruminococcus                                 | 2,791               | 1,802 | 18,138,443             | 17,185,247 | 16,487                 | 21,294 |
| Bacteroides                                  | 1,862               | 962   | 10,531,625             | 12,157,161 | 8,506                  | 12,292 |
| Clostridium                                  | 1,315               | 778   | 12,556,908             | 4,279,082  | 10,897                 | 4,987  |
| Eubacterium                                  | 1,299               | 433   | 10,492,400             | 2,092,398  | 9,006                  | 2,259  |
| Faecalibacterium                             | 1,129               | 889   | 22,388,736             | 9,586,340  | 22,867                 | 10,527 |
| Dorea                                        | 629                 | 325   | 3,457,301              | 2,025,422  | 3,161                  | 2,338  |
| Parabacteroides                              | 471                 | 266   | 2,352,723              | 1,105,076  | 2,608                  | 975    |
| Ruminococcaceae Unclassified                 | 413                 | 79    | 2,276,128              | 1,744,382  | 2,070                  | 1,731  |
| Methanobrevibacter                           | 141                 | 197   | 1,711,498              | 1,051,479  | 1,861                  | 1,110  |
| Bifidobacterium                              | 119                 | 15    | 5,166,191              | 4,805,836  | 5,382                  | 4,161  |
| Lachnospiraceae Unclassified                 | 97                  | 41    | 585,820                | 124,927    | 480                    | 146    |
| Collinsella                                  | 59                  | 54    | 1,627,144              | 2,316,022  | 1,783                  | 2,021  |
| Enterobacteriaceae Unclassified <sup>a</sup> | 40                  | 2     | 147,724                | 4,434      | 149                    | 7      |
| Alistipes                                    | 32                  | 130   | 2,710,216              | 447,729    | 2,449                  | 439    |
| Eubacteriaceae Unclassified                  | 29                  | 23    | 85,801                 | 66,193     | 92                     | 58     |
| Coriobacteriaceae Unclassified               | 23                  | 3     | 182,482                | 7,442      | 209                    | 8      |
| Erysipelotrichaceae Unclassified             | 22                  | 10    | 84,383                 | 29,951     | 77                     | 34     |
| Clostridiaceae Unclassified                  | 17                  | 4     | 127,019                | 18,710     | 129                    | 22     |
| Bacteroidaceae Unclassified                  | 14                  | 8     | 45,075                 | 33,885     | 44                     | 19     |
| Porphyromonadaceae<br>Unclassified           | 10                  | 3     | 32,223                 | 10,457     | 29                     | 11     |
| Providencia                                  | 3                   | 0     | 9,702                  | 0          | 11                     | 0      |
| Streptococcus                                | 3                   | 1     | 7,106                  | 4,220      | 8                      | 1      |
| Lactococcus                                  | 3                   | 2     | 7,425                  | 5,512      | 5                      | 7      |
| Bifidobacteriaceae Unclassified              | 3                   | 0     | 7,194                  | 0          | 4                      | 0      |
| Rikenellaceae Unclassified                   | 1                   | 0     | 2,140                  | 0          | 2                      | 0      |
| Methanobacteriaceae<br>Unclassified          | 0                   | 1     | 0                      | 2,025      | 0                      | 1      |
| Streptococcaceae Unclassified                | 0                   | 1     | 0                      | 5,347      | 0                      | 5      |
| Total                                        | 10,525              | 6,029 | 94,733,407             | 59,109,277 | 88,316                 | 64,453 |
| Percentage binned                            | 89.3                | 94.3  | 94.7                   | 96.3       |                        |        |

<sup>a</sup>Unclassified refers to scaffolds that were binned at the family-level but could not be resolved at the genus-level.

**Table S7: Genomes in the reference human gut microbe database.**

| Strain name                                 | NCBI Taxonomy                                                                                                               |
|---------------------------------------------|-----------------------------------------------------------------------------------------------------------------------------|
| Actinomyces odontolyticus                   | Actinobacteria; Actinobacteria (class); Actinobacteridae; Actinomycetales; Actinomycineae; Actinomycetaceae; Actinomyces    |
| Bifidobacterium adolescentis                | Actinobacteria; Actinobacteria (class); Actinobacteridae; Bifidobacteriales; Bifidobacteriaceae; Bifidobacterium            |
| Bifidobacterium adolescentis ATCC15703      | Actinobacteria; Actinobacteria (class); Actinobacteridae; Bifidobacteriales; Bifidobacteriaceae; Bifidobacterium            |
| Bifidobacterium angulatum                   | Actinobacteria; Actinobacteria (class); Actinobacteridae; Bifidobacteriales; Bifidobacteriaceae; Bifidobacterium            |
| Bifidobacterium animalis HN019              | Actinobacteria; Actinobacteria (class); Actinobacteridae; Bifidobacteriales; Bifidobacteriaceae; Bifidobacterium            |
| Bifidobacterium animalis subsp lactis AD011 | Actinobacteria; Actinobacteria (class); Actinobacteridae; Bifidobacteriales; Bifidobacteriaceae; Bifidobacterium            |
| Bifidobacterium breve                       | Actinobacteria; Actinobacteria (class); Actinobacteridae; Bifidobacteriales; Bifidobacteriaceae; Bifidobacterium            |
| Bifidobacterium catenulatum                 | Actinobacteria; Actinobacteria (class); Actinobacteridae; Bifidobacteriales; Bifidobacteriaceae; Bifidobacterium            |
| Bifidobacterium dentium                     | Actinobacteria; Actinobacteria (class); Actinobacteridae; Bifidobacteriales; Bifidobacteriaceae; Bifidobacterium            |
| Bifidobacterium gallicum                    | Actinobacteria; Actinobacteria (class); Actinobacteridae; Bifidobacteriales; Bifidobacteriaceae; Bifidobacterium            |
| Bifidobacterium longum DJO10A               | Actinobacteria; Actinobacteria (class); Actinobacteridae; Bifidobacteriales; Bifidobacteriaceae; Bifidobacterium            |
| Bifidobacterium longum NCC2705              | Actinobacteria; Actinobacteria (class); Actinobacteridae; Bifidobacteriales; Bifidobacteriaceae; Bifidobacterium            |
| Bifidobacterium pseudocatenulatum           | Actinobacteria; Actinobacteria (class); Actinobacteridae; Bifidobacteriales; Bifidobacteriaceae; Bifidobacterium            |
| Collinsella aerofaciens                     | Actinobacteria; Actinobacteria (class); Coriobacteridae; Coriobacteriales; Coriobacterineae; Coriobacteriaceae; Collinsella |
| Collinsella intestinalis                    | Actinobacteria; Actinobacteria (class); Coriobacteridae; Coriobacteriales; Coriobacterineae; Coriobacteriaceae; Collinsella |
| Collinsella stercoris                       | Actinobacteria; Actinobacteria (class); Coriobacteridae; Coriobacteriales; Coriobacterineae; Coriobacteriaceae; Collinsella |
| Bacteroides caccae                          | Bacteroidetes/Chlorobi group; Bacteroidetes; Bacteroidia; Bacteroidales; Bacteroidaceae; Bacteroides                        |
| Bacteroides cellulosilyticus                | Bacteroidetes/Chlorobi group; Bacteroidetes; Bacteroidia; Bacteroidales; Bacteroidaceae; Bacteroides                        |
| Bacteroides coprocola                       | Bacteroidetes/Chlorobi group; Bacteroidetes; Bacteroidia; Bacteroidales; Bacteroidaceae; Bacteroides                        |
| Bacteroides coprophilus                     | Bacteroidetes/Chlorobi group; Bacteroidetes; Bacteroidia; Bacteroidales; Bacteroidaceae; Bacteroides                        |
| Bacteroides dorei                           | Bacteroidetes/Chlorobi group; Bacteroidetes; Bacteroidia; Bacteroidales; Bacteroidaceae; Bacteroides                        |
| Bacteroides eggerthii                       | Bacteroidetes/Chlorobi group; Bacteroidetes; Bacteroidia; Bacteroidales; Bacteroidaceae; Bacteroides                        |
| Bacteroides finegoldii                      | Bacteroidetes/Chlorobi group; Bacteroidetes; Bacteroidia; Bacteroidales; Bacteroidaceae; Bacteroides                        |
| Bacteroides fragilis 3_1_12                 | Bacteroidetes/Chlorobi group; Bacteroidetes; Bacteroidia; Bacteroidales; Bacteroidaceae; Bacteroides                        |
| Bacteroides fragilis NCTC9343               | Bacteroidetes/Chlorobi group; Bacteroidetes; Bacteroidia; Bacteroidales; Bacteroidaceae; Bacteroides                        |
| Bacteroides fragilis YCH46                  | Bacteroidetes/Chlorobi group; Bacteroidetes; Bacteroidia; Bacteroidales; Bacteroidaceae; Bacteroides                        |
| Bacteroides intestinalis                    | Bacteroidetes/Chlorobi group; Bacteroidetes; Bacteroidia; Bacteroidales; Bacteroidaceae; Bacteroides                        |
| Bacteroides ovatus                          | Bacteroidetes/Chlorobi group; Bacteroidetes; Bacteroidia; Bacteroidales; Bacteroidaceae; Bacteroides                        |
| Bacteroides plebeius                        | Bacteroidetes/Chlorobi group; Bacteroidetes; Bacteroidia; Bacteroidales; Bacteroidaceae; Bacteroides                        |
| <b>Bacteroides sp 1_1_6</b>                 | <b>Bacteroidetes/Chlorobi group; Bacteroidetes; Bacteroidia; Bacteroidales; Bacteroidaceae; Bacteroides</b>                 |
| Bacteroides sp D1                           | Bacteroidetes/Chlorobi group; Bacteroidetes; Bacteroidia; Bacteroidales; Bacteroidaceae; Bacteroides                        |
| Bacteroides sp D2                           | Bacteroidetes/Chlorobi group; Bacteroidetes; Bacteroidia; Bacteroidales;                                                    |

|                                                                    |                                                                                                              |
|--------------------------------------------------------------------|--------------------------------------------------------------------------------------------------------------|
|                                                                    | Bacteroidaceae; Bacteroides                                                                                  |
| <i>Bacteroides stercoris</i>                                       | Bacteroidetes/Chlorobi group; Bacteroidetes; Bacteroidia; Bacteroidales; Bacteroidaceae; Bacteroides         |
| <i>Bacteroides thetaiotaomicron</i> 3731                           | Bacteroidetes/Chlorobi group; Bacteroidetes; Bacteroidia; Bacteroidales; Bacteroidaceae; Bacteroides         |
| <i>Bacteroides thetaiotaomicron</i> 7330                           | Bacteroidetes/Chlorobi group; Bacteroidetes; Bacteroidia; Bacteroidales; Bacteroidaceae; Bacteroides         |
| <i>Bacteroides thetaiotaomicron</i> VPI5482                        | Bacteroidetes/Chlorobi group; Bacteroidetes; Bacteroidia; Bacteroidales; Bacteroidaceae; Bacteroides         |
| <i>Bacteroides uniformis</i>                                       | Bacteroidetes/Chlorobi group; Bacteroidetes; Bacteroidia; Bacteroidales; Bacteroidaceae; Bacteroides         |
| <i>Bacteroides vulgatus</i> ATCC8482                               | Bacteroidetes/Chlorobi group; Bacteroidetes; Bacteroidia; Bacteroidales; Bacteroidaceae; Bacteroides         |
| <i>Bacteroides</i> WH2                                             | Bacteroidetes/Chlorobi group; Bacteroidetes; Bacteroidia; Bacteroidales; Bacteroidaceae; Bacteroides         |
| <b><i>Bacteroides xylanisolvens</i> XB1A</b>                       | <b>Bacteroidetes/Chlorobi group; Bacteroidetes; Bacteroidia; Bacteroidales; Bacteroidaceae; Bacteroides</b>  |
| <i>Parabacteroides distasonis</i> ATCC8503                         | Bacteroidetes/Chlorobi group; Bacteroidetes; Bacteroidia; Bacteroidales; Porphyromonadaceae; Parabacteroides |
| <i>Parabacteroides johnsonii</i>                                   | Bacteroidetes/Chlorobi group; Bacteroidetes; Bacteroidia; Bacteroidales; Porphyromonadaceae; Parabacteroides |
| <i>Parabacteroides merdae</i>                                      | Bacteroidetes/Chlorobi group; Bacteroidetes; Bacteroidia; Bacteroidales; Porphyromonadaceae; Parabacteroides |
| <i>Prevotella copri</i>                                            | Bacteroidetes/Chlorobi group; Bacteroidetes; Bacteroidia; Bacteroidales; Prevotellaceae; Prevotella          |
| <i>Alistipes putredinis</i>                                        | Bacteroidetes/Chlorobi group; Bacteroidetes; Bacteroidia; Bacteroidales; Rikenellaceae; Alistipes            |
| <i>Victivallis vadensis</i> ATCCBAA548                             | Chlamydiae/Verrucomicrobia group; Lentisphaerae; Victivallales; Victivallaceae; Victivallis                  |
| <i>Methanobrevibacter smithii</i> ATCC35061                        | Euryarchaeota; Methanobacteria; Methanobacteriales; Methanobacteriaceae; Methanobrevibacter                  |
| <i>Methanobrevibacter smithii</i> DSM2374                          | Euryarchaeota; Methanobacteria; Methanobacteriales; Methanobacteriaceae; Methanobrevibacter                  |
| <i>Methanobrevibacter smithii</i> DSM2375                          | Euryarchaeota; Methanobacteria; Methanobacteriales; Methanobacteriaceae; Methanobrevibacter                  |
| <i>Methanosphaera stadtmanae</i> DSM3091                           | Euryarchaeota; Methanobacteria; Methanobacteriales; Methanobacteriaceae; Methanosphaera                      |
| <i>Lactobacillus casei</i> ATCC334                                 | Firmicutes; Bacilli; Lactobacillales; Lactobacillaceae; Lactobacillus                                        |
| <i>Lactobacillus delbrueckii</i> subsp <i>bulgaricus</i> ATCC11842 | Firmicutes; Bacilli; Lactobacillales; Lactobacillaceae; Lactobacillus                                        |
| <i>Lactococcus lactis</i> subsp <i>cremoris</i> MG1363             | Firmicutes; Bacilli; Lactobacillales; Streptococcaceae; Lactococcus                                          |
| <i>Lactococcus lactis</i> subsp <i>cremoris</i> SK11               | Firmicutes; Bacilli; Lactobacillales; Streptococcaceae; Lactococcus                                          |
| <i>Lactococcus lactis</i> subsp <i>lactis</i> II1403               | Firmicutes; Bacilli; Lactobacillales; Streptococcaceae; Lactococcus                                          |
| <i>Streptococcus infantarius</i>                                   | Firmicutes; Bacilli; Lactobacillales; Streptococcaceae; Streptococcus                                        |
| <i>Streptococcus thermophilus</i> CNRZ1066                         | Firmicutes; Bacilli; Lactobacillales; Streptococcaceae; Streptococcus                                        |
| <i>Streptococcus thermophilus</i> LMD9                             | Firmicutes; Bacilli; Lactobacillales; Streptococcaceae; Streptococcus                                        |
| <i>Streptococcus thermophilus</i> LMG18311                         | Firmicutes; Bacilli; Lactobacillales; Streptococcaceae; Streptococcus                                        |
| <i>Bacteroides capillosus</i>                                      | Firmicutes; Clostridia; Clostridiales; Clostridiaceae; Clostridium                                           |
| <i>Clostridium asparagiforme</i>                                   | Firmicutes; Clostridia; Clostridiales; Clostridiaceae; Clostridium                                           |
| <i>Clostridium bartlettii</i>                                      | Firmicutes; Clostridia; Clostridiales; Clostridiaceae; Clostridium                                           |
| <i>Clostridium bolteae</i>                                         | Firmicutes; Clostridia; Clostridiales; Clostridiaceae; Clostridium                                           |
| <i>Clostridium hiranonis</i>                                       | Firmicutes; Clostridia; Clostridiales; Clostridiaceae; Clostridium                                           |
| <i>Clostridium hylemonae</i>                                       | Firmicutes; Clostridia; Clostridiales; Clostridiaceae; Clostridium                                           |
| <i>Clostridium leptum</i>                                          | Firmicutes; Clostridia; Clostridiales; Clostridiaceae; Clostridium                                           |
| <i>Clostridium methylpentosum</i>                                  | Firmicutes; Clostridia; Clostridiales; Clostridiaceae; Clostridium                                           |
| <i>Clostridium nexile</i>                                          | Firmicutes; Clostridia; Clostridiales; Clostridiaceae; Clostridium                                           |
| <i>Clostridium scindens</i>                                        | Firmicutes; Clostridia; Clostridiales; Clostridiaceae; Clostridium                                           |
| <i>Clostridium</i> sp L2                                           | Firmicutes; Clostridia; Clostridiales; Clostridiaceae; Clostridium                                           |
| <i>Clostridium</i> sp M62/1                                        | Firmicutes; Clostridia; Clostridiales; Clostridiaceae; Clostridium                                           |
| <i>Clostridium</i> sp SS2                                          | Firmicutes; Clostridia; Clostridiales; Clostridiaceae; Clostridium                                           |

|                                               |                                                                                                                                |
|-----------------------------------------------|--------------------------------------------------------------------------------------------------------------------------------|
| <i>Clostridium sporogenes</i>                 | Firmicutes; Clostridia; Clostridiales; Clostridiaceae; Clostridium                                                             |
| <i>Clostridium symbiosum</i>                  | Firmicutes; Clostridia; Clostridiales; Clostridiaceae; Clostridium                                                             |
| <i>Anaerococcus hydrogenalis</i>              | Firmicutes; Clostridia; Clostridiales; Clostridiales incertae sedis; Clostridiales Family XI. Incertae Sedis; Anaerococcus     |
| <i>Peptostreptococcus micros</i>              | Firmicutes; Clostridia; Clostridiales; Clostridiales incertae sedis; Clostridiales Family XI. Incertae Sedis; Parvimonas       |
| <i>Anaerofustis stercorihominis</i>           | Firmicutes; Clostridia; Clostridiales; Eubacteriaceae; Anaerofustis                                                            |
| <i>Eubacterium eligens</i>                    | Firmicutes; Clostridia; Clostridiales; Eubacteriaceae; Eubacterium                                                             |
| <i>Eubacterium hallii</i>                     | Firmicutes; Clostridia; Clostridiales; Eubacteriaceae; Eubacterium                                                             |
| <i>Eubacterium rectale</i> ATCC33656          | Firmicutes; Clostridia; Clostridiales; Eubacteriaceae; Eubacterium                                                             |
| <i>Eubacterium ventriosum</i>                 | Firmicutes; Clostridia; Clostridiales; Eubacteriaceae; Eubacterium                                                             |
| <i>Anaerostipes caccae</i>                    | Firmicutes; Clostridia; Clostridiales; Lachnospiraceae; Anaerostipes                                                           |
| <i>Bryantella formatexigens</i>               | Firmicutes; Clostridia; Clostridiales; Lachnospiraceae; Bryantella                                                             |
| <i>Butyrivibrio crossotus</i>                 | Firmicutes; Clostridia; Clostridiales; Lachnospiraceae; Butyrivibrio                                                           |
| <i>Coprococcus comes</i>                      | Firmicutes; Clostridia; Clostridiales; Lachnospiraceae; Coprococcus                                                            |
| <i>Coprococcus eutactus</i>                   | Firmicutes; Clostridia; Clostridiales; Lachnospiraceae; Coprococcus                                                            |
| <i>Dorea formicigenerans</i>                  | Firmicutes; Clostridia; Clostridiales; Lachnospiraceae; Dorea                                                                  |
| <i>Dorea longicatena</i>                      | Firmicutes; Clostridia; Clostridiales; Lachnospiraceae; Dorea                                                                  |
| <i>Roseburia intestinalis</i> L1              | Firmicutes; Clostridia; Clostridiales; Lachnospiraceae; Roseburia                                                              |
| <i>Anaerotruncus colihominis</i>              | Firmicutes; Clostridia; Clostridiales; Ruminococcaceae; Anaerotruncus                                                          |
| <i>Faecalibacterium prausnitzii</i> M21/2     | Firmicutes; Clostridia; Clostridiales; Ruminococcaceae; Faecalibacterium                                                       |
| <b>Ruminococcus bromii</b> L263               | <b>Firmicutes; Clostridia; Clostridiales; Ruminococcaceae; Ruminococcus</b>                                                    |
| <i>Ruminococcus gnavus</i>                    | Firmicutes; Clostridia; Clostridiales; Ruminococcaceae; Ruminococcus                                                           |
| <i>Ruminococcus lactaris</i>                  | Firmicutes; Clostridia; Clostridiales; Ruminococcaceae; Ruminococcus                                                           |
| <i>Ruminococcus obeum</i>                     | Firmicutes; Clostridia; Clostridiales; Ruminococcaceae; Ruminococcus                                                           |
| <i>Ruminococcus torques</i>                   | Firmicutes; Clostridia; Clostridiales; Ruminococcaceae; Ruminococcus                                                           |
| <i>Subdoligranulum variabile</i>              | Firmicutes; Clostridia; Clostridiales; Ruminococcaceae; Subdoligranulum                                                        |
| <i>Blautia hansenii</i>                       | Firmicutes; Clostridia; Clostridiales; unclassified Clostridiales; Blautia                                                     |
| <i>Ruminococcus hydrogenotrophicus</i>        | Firmicutes; Clostridia; Clostridiales; unclassified Clostridiales; Blautia                                                     |
| <i>Mitsuokella multacida</i>                  | Firmicutes; Clostridia; Clostridiales; Veillonellaceae; Mitsuokella                                                            |
| <i>Catenibacterium mitsuokai</i>              | Firmicutes; Erysipelotrichi; Erysipelotrichales; Erysipelotrichaceae; Catenibacterium                                          |
| <i>Holdemania filiformis</i>                  | Firmicutes; Erysipelotrichi; Erysipelotrichales; Erysipelotrichaceae; Holdemania                                               |
| <i>Clostridium ramosum</i>                    | Firmicutes; Erysipelotrichi; Erysipelotrichales; Erysipelotrichaceae; unclassified Erysipelotrichaceae                         |
| <i>Clostridium spiroforme</i>                 | Firmicutes; Erysipelotrichi; Erysipelotrichales; Erysipelotrichaceae; unclassified Erysipelotrichaceae                         |
| <i>Eubacterium bifforme</i>                   | Firmicutes; Erysipelotrichi; Erysipelotrichales; Erysipelotrichaceae; unclassified Erysipelotrichaceae                         |
| <i>Eubacterium dolichum</i>                   | Firmicutes; Erysipelotrichi; Erysipelotrichales; Erysipelotrichaceae; unclassified Erysipelotrichaceae                         |
| <b>Clostridium Innocuum strain SB23</b>       | <b>Firmicutes; Erysipelotrichi; Erysipelotrichales; Erysipelotrichaceae; unclassified Erysipelotrichaceae</b>                  |
| <i>Fusobacterium</i> sp 4_1_13                | Fusobacteria; Fusobacteria (class); Fusobacteriales; Fusobacteriaceae; Fusobacterium                                           |
| <b>Fusobacterium varium</b> ATCC27725         | <b>Fusobacteria; Fusobacteria (class); Fusobacteriales; Fusobacteriaceae; Fusobacterium</b>                                    |
| <i>Desulfovibrio piger</i> ATCC29098          | Proteobacteria; delta/epsilon subdivisions; Deltaproteobacteria; Desulfovibrionales; Desulfovibrionaceae; Desulfovibrio        |
| <b>Desulfovibrio piger</b> GOR1               | <b>Proteobacteria; delta/epsilon subdivisions; Deltaproteobacteria; Desulfovibrionales; Desulfovibrionaceae; Desulfovibrio</b> |
| <i>Helicobacter pylori</i> HPAG1              | Proteobacteria; delta/epsilon subdivisions; Epsilonproteobacteria; Campylobacteriales; Helicobacteraceae; Helicobacter         |
| <i>Citrobacter</i> sp                         | Proteobacteria; Gammaproteobacteria; Enterobacteriales; Enterobacteriaceae; Citrobacter                                        |
| <i>Enterobacter cancerogenus</i>              | Proteobacteria; Gammaproteobacteria; Enterobacteriales; Enterobacteriaceae; Enterobacter                                       |
| <i>Escherichia coli</i> str K12 substr MG1655 | Proteobacteria; Gammaproteobacteria; Enterobacteriales; Enterobacteriaceae; Escherichia                                        |
| <i>Escherichia fergusonii</i> ATCC35469       | Proteobacteria; Gammaproteobacteria; Enterobacteriales; Enterobacteriaceae;                                                    |

|                           |                                                                                         |
|---------------------------|-----------------------------------------------------------------------------------------|
|                           | Escherichia                                                                             |
| Proteus penneri           | Proteobacteria; Gammaproteobacteria; Enterobacteriales; Enterobacteriaceae; Proteus     |
| Providencia alcalifaciens | Proteobacteria; Gammaproteobacteria; Enterobacteriales; Enterobacteriaceae; Providencia |
| Providencia rettgeri      | Proteobacteria; Gammaproteobacteria; Enterobacteriales; Enterobacteriaceae; Providencia |
| Providencia rustigianii   | Proteobacteria; Gammaproteobacteria; Enterobacteriales; Enterobacteriaceae; Providencia |
| Providencia stuartii      | Proteobacteria; Gammaproteobacteria; Enterobacteriales; Enterobacteriaceae; Providencia |
| Shigella sp D9            | Proteobacteria; Gammaproteobacteria; Enterobacteriales; Enterobacteriaceae; Shigella    |

*Legend* - Contig selection for PhyloPythia training was performed against all genomes except those in bold. Two additional gut microbial genomes were used for training: *Bacteroides pectinophilus* and *Eubacterium siraeum*.

**Table S8: Estimates of gene and gene cluster diversity using Bayesian fits of the log-normal, inverse-Gaussian, log-Student's t, and Sichel distributions.**

| Dataset                                    | Log-normal                    | Inverse-Gaussian              | Log-Student's t                           | Sichel                          |
|--------------------------------------------|-------------------------------|-------------------------------|-------------------------------------------|---------------------------------|
| TS28<br>expressed<br>genes <sup>b</sup>    | 89486; <b>90235</b> ;90975    | 90724; <b>91516</b> ;92345    | 84434; <b>85099</b> ;85789** <sup>a</sup> | 77187; <b>77572</b> ;77969      |
| TS28<br>expressed<br>clusters <sup>b</sup> | 36023; <b>36268</b> ;36506    | 35097; <b>35292</b> ;35498    | 35340; <b>35554</b> ;35781**              | 33223; <b>33351</b> ;33482      |
| TS28<br>genes <sup>c</sup>                 | 241113; <b>242029</b> ;242918 | 229119; <b>229746</b> ;230404 | 241132; <b>242023</b> ;242919**           | 240682; <b>241963</b> ;243603   |
| TS28<br>clusters <sup>c</sup>              | 114361; <b>114886</b> ;115433 | 106878; <b>107172</b> ;107489 | 114374; <b>114890</b> ;115422             | 114474; <b>115216</b> ;116071** |
| TS29<br>expressed<br>genes                 | 173737; <b>177606</b> ;181204 | 180075; <b>184535</b> ;189349 | 169316; <b>173309</b> ;177310**           | 123122; <b>124820</b> ;126715   |
| TS29<br>expressed<br>clusters              | 57873; <b>59389</b> ;60451    | 50819; <b>51753</b> ;52758    | 56854; <b>58339</b> ;59681**              | 44725; <b>45442</b> ;46168      |
| TS29<br>genes                              | 250842; <b>252399</b> ;254140 | 229132; <b>230164</b> ;231290 | 250914; <b>252527</b> ;254204             | 233035; <b>234661</b> ;236160** |
| TS29<br>clusters                           | 118004; <b>118886</b> ;119742 | 104394; <b>104896</b> ;105398 | 118046; <b>119005</b> ;119985             | 111523; <b>112522</b> ;113575** |

<sup>a</sup>Results are given as lower 2.5% quantile; 50% quantile (**median**); 97.5% quantile of the posterior distribution. \*\*indicates the best-fitting distribution from Deviance Information Criterion (DIC) values (in all cases significant).

<sup>b</sup>expressed genes and gene clusters were observed by sequencing total community cDNA.

<sup>c</sup>genes and gene clusters were observed by sequencing total community DNA.

**Table S9: Genes assigned to CAZy categories<sup>a</sup> in microbiome bins.**

| Individual | Genus                            | GH    | GT    | PL | CE  | CBM | COH | DOC |
|------------|----------------------------------|-------|-------|----|-----|-----|-----|-----|
| TS28       | Bacteroides                      | 323   | 129   | 22 | 3   | 28  |     |     |
| TS29       |                                  | 57    | 137   | 28 | 44  | 44  |     |     |
| TS28       | Ruminococcus                     | 366   | 148   |    | 3   | 46  |     | 11  |
| TS29       |                                  | 345   | 163   |    | 27  | 27  |     | 2   |
| TS28       | Faecalibacterium                 | 335   | 267   | 1  | 37  | 54  | 1   | 42  |
| TS29       |                                  | 135   | 82    |    | 9   | 1   |     |     |
| TS28       | Clostridium                      | 18    | 92    | 1  | 13  | 22  |     |     |
| TS29       |                                  | 68    | 36    | 2  | 2   | 6   |     |     |
| TS28       | Bifidobacterium                  | 117   | 5     |    | 3   | 18  |     |     |
| TS29       |                                  | 128   | 48    |    | 3   | 23  |     |     |
| TS28       | Eubacterium                      | 1     | 12    | 1  | 12  | 23  |     | 9   |
| TS29       |                                  | 22    | 13    |    | 1   | 4   |     | 8   |
| TS28       | Parabacteroides                  | 76    | 14    |    | 7   | 7   |     | 1   |
| TS29       |                                  | 24    | 12    |    | 3   | 4   |     |     |
| TS28       | Dorea                            | 49    | 38    |    | 6   | 6   |     |     |
| TS29       |                                  | 14    | 9     |    | 2   | 1   |     |     |
| TS28       | Ruminococcaceae Unc <sup>b</sup> | 3     | 14    |    | 1   | 1   |     | 1   |
| TS29       |                                  | 28    | 25    |    | 5   | 4   |     |     |
| TS28       | Collinsella                      | 5     | 9     |    | 2   | 4   |     |     |
| TS29       |                                  | 19    | 24    |    | 4   | 2   |     |     |
| TS28       | Alistipes                        | 13    | 19    |    | 2   | 3   |     |     |
| TS29       |                                  |       | 3     |    |     |     |     |     |
| TS28       | Lachnospiraceae Unc              | 6     | 6     |    |     |     |     |     |
| TS29       |                                  | 1     | 1     |    |     |     |     |     |
| TS28       | Coriobacteriaceae Unc            | 2     | 2     |    | 1   |     |     |     |
| TS29       |                                  |       |       |    |     |     |     |     |
| TS28       | Erysipelotrichaceae Unc          | 1     | 5     |    |     |     |     |     |
| TS29       |                                  |       | 6     |    |     |     |     |     |
| TS28       | Eubacteriaceae Unc               |       | 4     |    |     |     |     |     |
| TS29       |                                  | 1     |       |    |     |     |     |     |
| TS28       | Methanobrevibacter               |       | 27    |    | 1   |     |     |     |
| TS29       |                                  |       | 19    |    | 1   |     |     |     |
| TS28       | Porphyromonadaceae Unc           | 1     |       |    |     |     |     |     |
| TS29       |                                  |       |       |    |     |     |     |     |
| TS28       | Enterobacteriaceae Unc           |       | 1     |    |     |     |     |     |
| TS29       |                                  |       |       |    |     |     |     |     |
| TS28       | Bacteroidaceae Unc               |       |       |    |     |     |     |     |
| TS29       |                                  | 1     | 3     |    |     |     |     |     |
| TOTAL      |                                  | 2,897 | 1,526 | 64 | 246 | 337 | 1   | 74  |

<sup>a</sup>Categories include: glycoside hydrolases (GH), glycosyl-transferases (GT), polysaccharide lyases (PL), carbohydrate esterases (CE), carbohydrate-binding modules (CBM), cohesins (COH), and dockerins (DOC).

<sup>b</sup>Unc indicates unclassified scaffolds that were binned at the family but not genus level.







**Table S11: Genes with high or low relative expression in the TS28 fecal meta-transcriptome.**

| Gene                     | cDNA sequences | DNA sequences | Ratio | COG categories | COGs                            | COG Annotations                                                                                                                                                                                                                                       |
|--------------------------|----------------|---------------|-------|----------------|---------------------------------|-------------------------------------------------------------------------------------------------------------------------------------------------------------------------------------------------------------------------------------------------------|
| TS28Met1158 CDS CDS      | 82.2           | 1.3           | 217.3 | B              | COG2036                         | Histones H3 and H4                                                                                                                                                                                                                                    |
| Msmi750732 CDS CDS       | 82.2           | 1.3           | 217.3 | B              | COG2036                         | Histones H3 and H4                                                                                                                                                                                                                                    |
| Msmi740947 CDS CDS       | 82.2           | 1.3           | 217.3 | B              | COG2036                         | Histones H3 and H4                                                                                                                                                                                                                                    |
| Msmi740186 CDS CDS       | 121.2          | 0.5           | 801.7 | C              | COG2141                         | Coenzyme F420-dependent N5,N10-methylene tetrahydromethanopterin reductase and related flavin-dependent oxidoreductases                                                                                                                               |
| Msmi740434 CDS CDS       | 65.3           | 0.5           | 431.8 | C              | COG1853 COG0446 COG1773 COG0426 | Conserved protein/domain typically associated with flavoprotein oxygenases, DIM6/NTAB family Uncharacterized NAD(FAD)-dependent dehydrogenases Rubredoxin Uncharacterized flavoproteins                                                               |
| Bova1292 CDS CDS         | 161.0          | 2.0           | 266.2 | C              | COG1145                         | Ferredoxin                                                                                                                                                                                                                                            |
| Msmi751243 CDS CDS       | 65.9           | 0.8           | 261.4 | C              | COG1853 COG0446 COG1773 COG0426 | Conserved protein/domain typically associated with flavoprotein oxygenases, DIM6/NTAB family Uncharacterized NAD(FAD)-dependent dehydrogenases Rubredoxin Uncharacterized flavoproteins                                                               |
| Msmi740445 CDS CDS       | 59.9           | 1.3           | 148.6 | C              | COG1148 COG1908                 | Heterodisulfide reductase, subunit A and related polyferredoxins Coenzyme F420-reducing hydrogenase, delta subunit                                                                                                                                    |
| Msmi751494 CDS CDS       | 165.4          | 4.3           | 126.2 | C              | COG2141                         | Coenzyme F420-dependent N5,N10-methylene tetrahydromethanopterin reductase and related flavin-dependent oxidoreductases                                                                                                                               |
| Msmi740666 CDS CDS       | 59.5           | 1.8           | 112.4 | C              | COG0680                         | Ni,Fe-hydrogenase maturation factor                                                                                                                                                                                                                   |
| TS28Met1385 CDS CDS      | 59.5           | 1.8           | 112.4 | C              | COG0680                         | Ni,Fe-hydrogenase maturation factor                                                                                                                                                                                                                   |
| Msmi751010 CDS CDS       | 59.5           | 1.8           | 112.4 | C              | COG0680                         | Ni,Fe-hydrogenase maturation factor                                                                                                                                                                                                                   |
| Msmi751009 CDS CDS       | 16.9           | 0.5           | 111.8 | C              | COG1941                         | Coenzyme F420-reducing hydrogenase, gamma subunit                                                                                                                                                                                                     |
| TS28Clo6848 CDS CDS      | 131.0          | 5.0           | 86.6  | C              | COG1454                         | Alcohol dehydrogenase, class IV                                                                                                                                                                                                                       |
| Msmi750889 CDS CDS       | 33.8           | 1.3           | 83.9  | C              | COG0374 COG3259                 | Ni,Fe-hydrogenase I large subunit Coenzyme F420-reducing hydrogenase, alpha subunit                                                                                                                                                                   |
| Msmi740794 CDS CDS       | 37.7           | 1.7           | 74.7  | C              | COG0374 COG3259                 | Ni,Fe-hydrogenase I large subunit Coenzyme F420-reducing hydrogenase, alpha subunit                                                                                                                                                                   |
| Msmi750591 CDS CDS       | 28.8           | 1.3           | 71.5  | C              | COG1151                         | 6Fe-6S prismatic cluster-containing protein                                                                                                                                                                                                           |
| TS28Bac03394 CDS CDS     | 20.5           | 1.0           | 67.8  | C              | COG0039                         | Malate/lactate dehydrogenases                                                                                                                                                                                                                         |
| Bxv11753 CDS CDS         | 6.6            | 0.3           | 65.3  | C              | COG1866                         | Phosphoenolpyruvate carboxykinase (ATP)                                                                                                                                                                                                               |
| Msmi741634 CDS CDS       | 2.3            | 0.1           | 60.8  | C              | COG0371                         | Glycerol dehydrogenase and related enzymes                                                                                                                                                                                                            |
| TS28Bac5354 CDS CDS      | 339.8          | 18.5          | 60.7  | C              | COG1145                         | Ferredoxin                                                                                                                                                                                                                                            |
| CspL20570 CDS CDS        | 9.0            | 0.5           | 59.5  | C              | COG1454                         | Alcohol dehydrogenase, class IV                                                                                                                                                                                                                       |
| Msmi740665 CDS CDS       | 41.8           | 2.3           | 59.2  | C              | COG0374 COG3259 COG3261         | Ni,Fe-hydrogenase I large subunit Coenzyme F420-reducing hydrogenase, alpha subunit Ni,Fe-hydrogenase III large subunit                                                                                                                               |
| CspSS20152 CDS CDS       | 106.2          | 6.0           | 58.5  | C              | COG1592                         | Rubrervertin                                                                                                                                                                                                                                          |
| TS28Fae20658 CDS CDS     | 202.2          | 12.0          | 55.7  | C              | COG1592                         | Rubrervertin                                                                                                                                                                                                                                          |
| Bdor3549 CDS CDS         | 16.8           | 1.0           | 55.7  | C              | COG0822                         | NifU homolog involved in Fe-S cluster formation                                                                                                                                                                                                       |
| Msmi750814 CDS CDS       | 5.5            | 0.3           | 54.6  | C              | COG0045                         | Succinyl-CoA synthetase, beta subunit                                                                                                                                                                                                                 |
| Bste0134 CDS CDS         | 113.0          | 7.0           | 53.4  | C              | COG0039                         | Malate/lactate dehydrogenases                                                                                                                                                                                                                         |
| Hfl10795 CDS CDS         | 16.0           | 1.0           | 52.9  | C              | COG1902 COG1053 COG3976         | NADH:flavin oxidoreductases, Old Yellow Enzyme family Succinate dehydrogenase/fumarate reductase, flavoprotein subunit Uncharacterized protein conserved in bacteria                                                                                  |
| PRABACTJOHN2409 CDS CDS  | 16.0           | 1.0           | 52.9  | C              | COG1592                         | Rubrervertin                                                                                                                                                                                                                                          |
| TS28Met1797 CDS CDS      | 15.4           | 1.0           | 51.0  | C              | COG1773 COG1853 COG1592         | Rubredoxin Conserved protein/domain typically associated with flavoprotein oxygenases, DIM6/NTAB family Rubrervertin                                                                                                                                  |
| Msmi741534 CDS CDS       | 15.4           | 1.0           | 51.0  | C              | COG1592 COG1853 COG1773         | Rubrervertin Conserved protein/domain typically associated with flavoprotein oxygenases, DIM6/NTAB family Rubredoxin                                                                                                                                  |
| Msmi750184 CDS CDS       | 15.4           | 1.0           | 51.0  | C              | COG1592 COG1853 COG1773         | Rubrervertin Conserved protein/domain typically associated with flavoprotein oxygenases, DIM6/NTAB family Rubredoxin                                                                                                                                  |
| Dlon0162 CDS CDS         | 7.5            | 0.5           | 49.6  | C              | COG4656                         | Predicted NADH:ubiquinone oxidoreductase, subunit RnfC                                                                                                                                                                                                |
| TS29Rum17368 CDS CDS     | 14.0           | 1.0           | 46.3  | C              | COG1151                         | 6Fe-6S prismatic cluster-containing protein                                                                                                                                                                                                           |
| TS28Met0317 CDS CDS      | 7.0            | 0.5           | 46.3  | C              | COG1013 COG1142                 | Pyruvate:ferredoxin oxidoreductase and related 2-oxoacid:ferredoxin oxidoreductases, beta subunit Fe-S-cluster-containing hydrogenase components 2                                                                                                    |
| TS28RumUnc1774 CDS CDS   | 13.5           | 1.0           | 44.6  | C              | COG0355                         | FOF1-type ATP synthase, epsilon subunit (mitochondrial delta subunit)                                                                                                                                                                                 |
| Msmi751293 CDS CDS       | 32.2           | 2.4           | 44.0  | C              | COG1035 COG1145 COG1908         | Coenzyme F420-reducing hydrogenase, beta subunit Ferredoxin Coenzyme F420-reducing hydrogenase, delta subunit                                                                                                                                         |
| Msmi740203 CDS CDS       | 15.3           | 1.2           | 43.5  | C              | COG1014 COG1013 COG1142         | Pyruvate:ferredoxin oxidoreductase and related 2-oxoacid:ferredoxin oxidoreductases, gamma subunit Pyruvate:ferredoxin oxidoreductase and related 2-oxoacid:ferredoxin oxidoreductases, beta subunit Fe-S-cluster-containing hydrogenase components 2 |
| TS28Met0338 CDS CDS      | 187.6          | 14.3          | 43.3  | C              | COG2141                         | Coenzyme F420-dependent N5,N10-methylene tetrahydromethanopterin reductase and related flavin-dependent oxidoreductases                                                                                                                               |
| TS29Clo1195 CDS CDS      | 6.5            | 0.5           | 43.0  | C              | COG1592                         | Rubrervertin                                                                                                                                                                                                                                          |
| Msmi740204 CDS CDS       | 6.4            | 0.5           | 42.4  | C              | COG1142 COG0437                 | Fe-S-cluster-containing hydrogenase components 2 Fe-S-cluster-containing hydrogenase components 1                                                                                                                                                     |
| Msm1348 CDS Rubrervertin | 19.2           | 1.5           | 42.3  | C              | COG1592                         | Rubrervertin                                                                                                                                                                                                                                          |
| Msmi750683 CDS CDS       | 12.5           | 1.0           | 41.4  | C              | COG0479 COG2048                 | Succinate dehydrogenase/fumarate reductase, Fe-S protein subunit Heterodisulfide reductase, subunit B                                                                                                                                                 |
| Msmi740998 CDS CDS       | 12.2           | 1.0           | 40.3  | C              | COG0479 COG2048                 | Succinate dehydrogenase/fumarate reductase, Fe-S protein subunit Heterodisulfide reductase, subunit B                                                                                                                                                 |
| TS29Col1204 CDS CDS      | 6.1            | 0.5           | 40.2  | C              | COG1592                         | Rubrervertin                                                                                                                                                                                                                                          |
| Ehal0657 CDS CDS         | 12.0           | 1.0           | 39.7  | C              | COG4624 COG3383 COG1034 COG0243 | Iron only hydrogenase large subunit, C-terminal domain Uncharacterized anaerobic dehydrogenase NADH dehydrogenase/NADH:ubiquinone oxidoreductase 75 kD subunit (chain G) Anaerobic dehydrogenases, typically selenocysteine-containing                |
| ShigsPD90600 CDS CDS     | 6.0            | 0.5           | 39.7  | C              | COG3954                         | Phosphoribulokinase                                                                                                                                                                                                                                   |
| Rgna2175 CDS CDS         | 6.0            | 0.5           | 39.7  | C              | COG0554                         | Glycerol kinase                                                                                                                                                                                                                                       |

|                        |       |      |      |   |                                 |                                                                                                                                                                                                                                                                                                         |
|------------------------|-------|------|------|---|---------------------------------|---------------------------------------------------------------------------------------------------------------------------------------------------------------------------------------------------------------------------------------------------------------------------------------------------------|
| Msmi751475 CDS CDS     | 5.8   | 0.5  | 38.0 | C | COG1142 COG0437                 | Fe-S-cluster-containing hydrogenase components 2 Fe-S-cluster-containing hydrogenase components 1                                                                                                                                                                                                       |
| Pmer3609 CDS CDS       | 23.0  | 2.0  | 38.0 | C | COG1012                         | NAD-dependent aldehyde dehydrogenases                                                                                                                                                                                                                                                                   |
| Msmi741567 CDS CDS     | 5.7   | 0.5  | 37.5 | C | COG1853 COG0446 COG1773 COG0426 | Conserved protein/domain typically associated with flavoprotein oxygenases, DIM6/NTAB family Uncharacterized NAD(FAD)-dependent dehydrogenases Rubredoxin Uncharacterized flavoproteins                                                                                                                 |
| Msmi740384 CDS CDS     | 28.7  | 2.6  | 36.7 | C | COG1035 COG1145 COG1908         | Coenzyme F420-reducing hydrogenase, beta subunit Ferredoxin Coenzyme F420-reducing hydrogenase, delta subunit                                                                                                                                                                                           |
| Msmi740792 CDS CDS     | 13.5  | 1.3  | 35.7 | C | COG1908 COG1941                 | Coenzyme F420-reducing hydrogenase, delta subunit Coenzyme F420-reducing hydrogenase, gamma subunit                                                                                                                                                                                                     |
| TS29Eub1165 CDS CDS    | 64.7  | 6.0  | 35.6 | C | COG1454                         | Alcohol dehydrogenase, class IV                                                                                                                                                                                                                                                                         |
| TS28Fae08859 CDS CDS   | 106.5 | 10.0 | 35.2 | C | COG1592                         | Rubrerivthrin                                                                                                                                                                                                                                                                                           |
| TS29Bac04866 CDS CDS   | 10.2  | 1.0  | 33.6 | C | COG0356                         | F0F1-type ATP synthase, subunit a                                                                                                                                                                                                                                                                       |
| TS29Bac02967 CDS CDS   | 3.3   | 0.3  | 33.1 | C | COG1866                         | Phosphoenolpyruvate carboxykinase (ATP)                                                                                                                                                                                                                                                                 |
| CspS20148 CDS CDS      | 10.0  | 1.0  | 33.1 | C | COG2086                         | Electron transfer flavoprotein, beta subunit                                                                                                                                                                                                                                                            |
| TS28Par0162 CDS CDS    | 5.0   | 0.5  | 33.1 | C | COG2025                         | Electron transfer flavoprotein, alpha subunit                                                                                                                                                                                                                                                           |
| TS29Clo3788 CDS CDS    | 10.0  | 1.0  | 33.1 | C | COG1894 COG1905                 | NADH:ubiquinone oxidoreductase, NADH-binding (51 kD) subunit NADH:ubiquinone oxidoreductase 24 kD subunit                                                                                                                                                                                               |
| Hfil1508 CDS CDS       | 10.0  | 1.0  | 33.1 | C | COG1014 COG1013 COG0674         | Pyruvate:ferredoxin oxidoreductase and related 2-oxoacid:ferredoxin oxidoreductases, gamma subunit Pyruvate:ferredoxin oxidoreductase and related 2-oxoacid:ferredoxin oxidoreductases, beta subunit Pyruvate:ferredoxin oxidoreductase and related 2-oxoacid:ferredoxin oxidoreductases, alpha subunit |
| TS28Bac1171 CDS CDS    | 15.0  | 1.5  | 33.1 | C | COG1014 COG0674                 | Pyruvate:ferredoxin oxidoreductase and related 2-oxoacid:ferredoxin oxidoreductases, gamma subunit Pyruvate:ferredoxin oxidoreductase and related 2-oxoacid:ferredoxin oxidoreductases, alpha subunit                                                                                                   |
| TS28RumUnc0596 CDS CDS | 10.0  | 1.0  | 33.1 | C | COG1013                         | Pyruvate:ferredoxin oxidoreductase and related 2-oxoacid:ferredoxin oxidoreductases, beta subunit                                                                                                                                                                                                       |
| TS29Bac00720 CDS CDS   | 3.3   | 0.3  | 33.1 | C | COG0056                         | F0F1-type ATP synthase, alpha subunit                                                                                                                                                                                                                                                                   |
| Msmi751230 CDS CDS     | 70.6  | 7.2  | 32.6 | C | COG1148 COG1908                 | Heterodisulfide reductase, subunit A and related polyferredoxins Coenzyme F420-reducing hydrogenase, delta subunit                                                                                                                                                                                      |
| Msmi751011 CDS CDS     | 46.5  | 4.8  | 31.8 | C | COG0374 COG3259 COG3261         | Ni,Fe-hydrogenase I large subunit Coenzyme F420-reducing hydrogenase, alpha subunit Ni,Fe-hydrogenase III large subunit                                                                                                                                                                                 |
| Bdor3290 CDS CDS       | 28.5  | 3.0  | 31.4 | C | COG1592                         | Rubrerivthrin                                                                                                                                                                                                                                                                                           |
| Bdor2083 CDS CDS       | 37.0  | 4.0  | 30.6 | C | COG1592 COG1853 COG2025 COG1773 | Rubrerivthrin Conserved protein/domain typically associated with flavoprotein oxygenases, DIM6/NTAB family Electron transfer flavoprotein, alpha subunit Rubredoxin                                                                                                                                     |
| Msmi740868 CDS CDS     | 6.2   | 0.7  | 30.6 | C | COG1014 COG1013                 | Pyruvate:ferredoxin oxidoreductase and related 2-oxoacid:ferredoxin oxidoreductases, gamma subunit Pyruvate:ferredoxin oxidoreductase and related 2-oxoacid:ferredoxin oxidoreductases, beta subunit                                                                                                    |
| Msmi751092 CDS CDS     | 33.6  | 3.7  | 30.3 | C | COG1927                         | Coenzyme F420-dependent N(5),N(10)-methyltetrahydromethanopterin dehydrogenase                                                                                                                                                                                                                          |
| Msmi740582 CDS CDS     | 33.6  | 3.7  | 30.3 | C | COG1927                         | Coenzyme F420-dependent N(5),N(10)-methyltetrahydromethanopterin dehydrogenase                                                                                                                                                                                                                          |
| Bdor4073 CDS CDS       | 18.3  | 2.0  | 30.3 | C | COG0055                         | F0F1-type ATP synthase, beta subunit                                                                                                                                                                                                                                                                    |
| TS29Bac03490 CDS CDS   | 3.0   | 0.3  | 29.8 | C | COG0852 COG0377                 | NADH:ubiquinone oxidoreductase 27 kD subunit NADH:ubiquinone oxidoreductase 20 kD subunit and related Fe-S oxidoreductases                                                                                                                                                                              |
| TS29Rum14613 CDS CDS   | 9.0   | 1.0  | 29.8 | C | COG2080 COG1529                 | Aerobic-type carbon monoxide dehydrogenase, small subunit CoxS/CutS homologs Aerobic-type carbon monoxide dehydrogenase, large subunit CoxL/CutL homologs                                                                                                                                               |
| Msmi741675 CDS CDS     | 3.6   | 0.4  | 29.8 | C | COG2037                         | Formylmethanofuran:tetrahydromethanopterin formyltransferase                                                                                                                                                                                                                                            |
| Msmi750910 CDS CDS     | 3.0   | 0.3  | 29.8 | C | COG1625                         | Fe-S oxidoreductase, related to NifB/MoaA family                                                                                                                                                                                                                                                        |
| Msmi751299 CDS CDS     | 8.7   | 1.0  | 28.8 | C | COG1153                         | Formylmethanofuran dehydrogenase subunit D                                                                                                                                                                                                                                                              |
| Msmi740668 CDS CDS     | 29.9  | 3.5  | 28.2 | C | COG1035 COG1145 COG2221 COG3350 | Coenzyme F420-reducing hydrogenase, beta subunit Ferredoxin Dissimilatory sulfite reductase (desulfoviridin), alpha and beta subunits Uncharacterized conserved protein                                                                                                                                 |
| Msmi751047 CDS CDS     | 5.9   | 0.7  | 27.9 | C | COG2710                         | Nitrogenase molybdenum-iron protein, alpha and beta chains                                                                                                                                                                                                                                              |
| Msmi751008 CDS CDS     | 12.6  | 1.5  | 27.9 | C | COG1035 COG1145 COG2221 COG3350 | Coenzyme F420-reducing hydrogenase, beta subunit Ferredoxin Dissimilatory sulfite reductase (desulfoviridin), alpha and beta subunits Uncharacterized conserved protein                                                                                                                                 |
| Dlon2091 CDS CDS       | 12.5  | 1.5  | 27.6 | C | COG1592                         | Rubrerivthrin                                                                                                                                                                                                                                                                                           |
| Bova1491 CDS CDS       | 16.4  | 2.0  | 27.2 | C | COG1866                         | Phosphoenolpyruvate carboxykinase (ATP)                                                                                                                                                                                                                                                                 |
| Cbo11741 CDS CDS       | 8.2   | 1.0  | 27.0 | C | COG1014 COG1013 COG0674         | Pyruvate:ferredoxin oxidoreductase and related 2-oxoacid:ferredoxin oxidoreductases, gamma subunit Pyruvate:ferredoxin oxidoreductase and related 2-oxoacid:ferredoxin oxidoreductases, beta subunit Pyruvate:ferredoxin oxidoreductase and related 2-oxoacid:ferredoxin oxidoreductases, alpha subunit |
| Ccom0561 CDS CDS       | 8.0   | 1.0  | 26.5 | C | COG5016 COG1038                 | Pyruvate:oxaloacetate carboxyltransferase Pyruvate carboxylase                                                                                                                                                                                                                                          |
| TS29Fae09192 CDS CDS   | 4.0   | 0.5  | 26.5 | C | COG2025 COG2086                 | Electron transfer flavoprotein, alpha subunit Electron transfer flavoprotein, beta subunit                                                                                                                                                                                                              |
| TS28Ali2359 CDS CDS    | 8.0   | 1.0  | 26.5 | C | COG2025                         | Electron transfer flavoprotein, alpha subunit                                                                                                                                                                                                                                                           |
| TS29Bac08557 CDS CDS   | 8.0   | 1.0  | 26.5 | C | COG1014 COG1146                 | Pyruvate:ferredoxin oxidoreductase and related 2-oxoacid:ferredoxin oxidoreductases, gamma subunit Ferredoxin                                                                                                                                                                                           |
| Bdor4074 CDS CDS       | 8.0   | 1.0  | 26.5 | C | COG0355                         | F0F1-type ATP synthase, epsilon subunit (mitochondrial delta subunit)                                                                                                                                                                                                                                   |
| Msmi751592 CDS CDS     | 5.2   | 0.7  | 26.4 | C | COG1269                         | Archaeal/vacuolar-type H <sup>+</sup> -ATPase subunit 1                                                                                                                                                                                                                                                 |

|                        |      |      |      |   |                                 |                                                                                                                                                                                                                                                                                                         |
|------------------------|------|------|------|---|---------------------------------|---------------------------------------------------------------------------------------------------------------------------------------------------------------------------------------------------------------------------------------------------------------------------------------------------------|
| Cint819 CDS CDS        | 7.7  | 1.0  | 25.4 | C | COG1014 COG1013 COG0674         | Pyruvate:ferredoxin oxidoreductase and related 2-oxoacid:ferredoxin oxidoreductases, gamma subunit Pyruvate:ferredoxin oxidoreductase and related 2-oxoacid:ferredoxin oxidoreductases, beta subunit Pyruvate:ferredoxin oxidoreductase and related 2-oxoacid:ferredoxin oxidoreductases, alpha subunit |
| TS29Met0495 CDS CDS    | 15.1 | 2.0  | 25.3 | C | COG3383 COG0243 COG1029         | Uncharacterized anaerobic dehydrogenase Anaerobic dehydrogenases, typically selenocysteine-containing Formylmethanofuran dehydrogenase subunit B                                                                                                                                                        |
| TS28Ali1245 CDS CDS    | 83.5 | 11.0 | 25.1 | C | COG0674                         | Pyruvate:ferredoxin oxidoreductase and related 2-oxoacid:ferredoxin oxidoreductases, alpha subunit                                                                                                                                                                                                      |
| Bthe7334651 CDS CDS    | 2.5  | 0.3  | 24.8 | C | COG1882                         | Pyruvate-formate lyase                                                                                                                                                                                                                                                                                  |
| Bsp1161141 CDS CDS     | 2.5  | 0.3  | 24.8 | C | COG1882                         | Pyruvate-formate lyase                                                                                                                                                                                                                                                                                  |
| Bdor1177 CDS CDS       | 29.7 | 4.0  | 24.5 | C | COG0039                         | Malate/lactate dehydrogenases                                                                                                                                                                                                                                                                           |
| Msmi750684 CDS CDS     | 23.3 | 3.3  | 23.7 | C | COG0247 COG2048 COG1150         | Fe-S oxidoreductase Heterodisulfide reductase, subunit B Heterodisulfide reductase, subunit C                                                                                                                                                                                                           |
| Msmi740202 CDS CDS     | 18.8 | 2.7  | 23.3 | C | COG1014 COG1013 COG0674         | Pyruvate:ferredoxin oxidoreductase and related 2-oxoacid:ferredoxin oxidoreductases, gamma subunit Pyruvate:ferredoxin oxidoreductase and related 2-oxoacid:ferredoxin oxidoreductases, beta subunit Pyruvate:ferredoxin oxidoreductase and related 2-oxoacid:ferredoxin oxidoreductases, alpha subunit |
| TS29Bac00287 CDS CDS   | 7.0  | 1.0  | 23.1 | C | COG2869                         | Na <sup>+</sup> -transporting NADH:ubiquinone oxidoreductase, subunit NqrC                                                                                                                                                                                                                              |
| Hfil1792 CDS CDS       | 7.0  | 1.0  | 23.1 | C | COG1905 COG1894                 | NADH:ubiquinone oxidoreductase 24 kD subunit NADH:ubiquinone oxidoreductase, NADH-binding (51 kD) subunit                                                                                                                                                                                               |
| Msmi740997 CDS CDS     | 22.0 | 3.3  | 22.4 | C | COG0247 COG2048 COG1150         | Fe-S oxidoreductase Heterodisulfide reductase, subunit B Heterodisulfide reductase, subunit C                                                                                                                                                                                                           |
| TS28RumUnc0593 CDS CDS | 54.0 | 8.0  | 22.3 | C | COG1014 COG0674                 | Pyruvate:ferredoxin oxidoreductase and related 2-oxoacid:ferredoxin oxidoreductases, gamma subunit Pyruvate:ferredoxin oxidoreductase and related 2-oxoacid:ferredoxin oxidoreductases, alpha subunit                                                                                                   |
| Msmi740201 CDS CDS     | 1.7  | 0.3  | 21.8 | C | COG1014                         | Pyruvate:ferredoxin oxidoreductase and related 2-oxoacid:ferredoxin oxidoreductases, gamma subunit                                                                                                                                                                                                      |
| Msmi741543 CDS CDS     | 3.8  | 0.6  | 21.5 | C | COG0221                         | Inorganic pyrophosphatase                                                                                                                                                                                                                                                                               |
| Pmer2622 CDS CDS       | 19.0 | 3.0  | 20.9 | C | COG5016 COG1038                 | Pyruvate:oxaloacetate carboxyltransferase Pyruvate carboxylase                                                                                                                                                                                                                                          |
| Ehai0042 CDS CDS       | 9.5  | 1.5  | 20.9 | C | COG2710                         | Nitrogenase molybdenum-iron protein, alpha and beta chains                                                                                                                                                                                                                                              |
| FpraM2121476 CDS CDS   | 6.3  | 1.0  | 20.9 | C | COG2414                         | Aldehyde:ferredoxin oxidoreductase                                                                                                                                                                                                                                                                      |
| RintL13461 CDS CDS     | 25.0 | 4.0  | 20.7 | C | COG0356                         | FOF1-type ATP synthase, subunit a                                                                                                                                                                                                                                                                       |
| TS29Fae08111 CDS CDS   | 3.0  | 0.5  | 19.8 | C | COG1882                         | Pyruvate-formate lyase                                                                                                                                                                                                                                                                                  |
| RintL12400 CDS CDS     | 6.0  | 1.0  | 19.8 | C | COG1151                         | 6Fe-6S prismatic cluster-containing protein                                                                                                                                                                                                                                                             |
| Msmi740930 CDS CDS     | 4.5  | 0.8  | 19.8 | C | COG0716                         | Flavodoxins                                                                                                                                                                                                                                                                                             |
| Msm0861 CDS flavodoxin | 4.5  | 0.8  | 19.8 | C | COG0716                         | Flavodoxins                                                                                                                                                                                                                                                                                             |
| Msmi750749 CDS CDS     | 4.5  | 0.8  | 19.8 | C | COG0716                         | Flavodoxins                                                                                                                                                                                                                                                                                             |
| Csci0616 CDS CDS       | 6.0  | 1.0  | 19.8 | C | COG0280 COG0857                 | Phosphotransacetylase BioD-like N-terminal domain of phosphotransacetylase                                                                                                                                                                                                                              |
| ShigspD92742 CDS CDS   | 6.0  | 1.0  | 19.8 | C | COG0277                         | FAD/FMN-containing dehydrogenases                                                                                                                                                                                                                                                                       |
| Pmer0377 CDS CDS       | 20.5 | 3.5  | 19.4 | C | COG1014 COG1013                 | Pyruvate:ferredoxin oxidoreductase and related 2-oxoacid:ferredoxin oxidoreductases, gamma subunit Pyruvate:ferredoxin oxidoreductase and related 2-oxoacid:ferredoxin oxidoreductases, beta subunit                                                                                                    |
| Msmi750891 CDS CDS     | 18.8 | 3.3  | 19.2 | C | COG1908 COG1941                 | Coenzyme F420-reducing hydrogenase, delta subunit Coenzyme F420-reducing hydrogenase, gamma subunit                                                                                                                                                                                                     |
| TS28Met0354 CDS CDS    | 18.8 | 3.3  | 19.2 | C | COG1908 COG1941                 | Coenzyme F420-reducing hydrogenase, delta subunit Coenzyme F420-reducing hydrogenase, gamma subunit                                                                                                                                                                                                     |
| Msmi740628 CDS CDS     | 5.9  | 1.0  | 18.9 | C | COG2710                         | Nitrogenase molybdenum-iron protein, alpha and beta chains                                                                                                                                                                                                                                              |
| TS28RumUnc1463 CDS CDS | 5.5  | 1.0  | 18.2 | C | COG2878                         | Predicted NADH:ubiquinone oxidoreductase, subunit RnfB                                                                                                                                                                                                                                                  |
| TS28Fae02269 CDS CDS   | 16.5 | 3.0  | 18.2 | C | COG2080 COG3427                 | Aerobic-type carbon monoxide dehydrogenase, small subunit CoxS/CutS homologs Uncharacterized conserved protein                                                                                                                                                                                          |
| Casp6372 CDS CDS       | 5.5  | 1.0  | 18.2 | C | COG1592                         | Rubryerythrin                                                                                                                                                                                                                                                                                           |
| Pmer2223 CDS CDS       | 5.5  | 1.0  | 18.2 | C | COG1249                         | Pyruvate/2-oxoglutarate dehydrogenase complex, dihydroliipoamide dehydrogenase (E3) component, and related enzymes                                                                                                                                                                                      |
| TS29Dor1290 CDS CDS    | 24.5 | 4.5  | 18.0 | C | COG1014 COG1013                 | Pyruvate:ferredoxin oxidoreductase and related 2-oxoacid:ferredoxin oxidoreductases, gamma subunit Pyruvate:ferredoxin oxidoreductase and related 2-oxoacid:ferredoxin oxidoreductases, beta subunit                                                                                                    |
| Bdor3235 CDS CDS       | 21.5 | 4.0  | 17.8 | C | COG1014 COG0674                 | Pyruvate:ferredoxin oxidoreductase and related 2-oxoacid:ferredoxin oxidoreductases, gamma subunit Pyruvate:ferredoxin oxidoreductase and related 2-oxoacid:ferredoxin oxidoreductases, alpha subunit                                                                                                   |
| Msmi751154 CDS CDS     | 2.7  | 0.5  | 17.6 | C | COG1053                         | Succinate dehydrogenase/fumarate reductase, flavoprotein subunit                                                                                                                                                                                                                                        |
| Acol2675 CDS CDS       | 8.0  | 1.5  | 17.6 | C | COG1014 COG0674                 | Pyruvate:ferredoxin oxidoreductase and related 2-oxoacid:ferredoxin oxidoreductases, gamma subunit Pyruvate:ferredoxin oxidoreductase and related 2-oxoacid:ferredoxin oxidoreductases, alpha subunit                                                                                                   |
| Chyl0524 CDS CDS       | 2.7  | 0.5  | 17.6 | C | COG0822                         | NifU homolog involved in Fe-S cluster formation                                                                                                                                                                                                                                                         |
| TS28Met0318 CDS CDS    | 10.5 | 2.0  | 17.4 | C | COG1013 COG1142                 | Pyruvate:ferredoxin oxidoreductase and related 2-oxoacid:ferredoxin oxidoreductases, beta subunit Fe-S-cluster-containing hydrogenase components 2                                                                                                                                                      |
| Ehai0970 CDS CDS       | 21.0 | 4.0  | 17.4 | C | COG0554                         | Glycerol kinase                                                                                                                                                                                                                                                                                         |
| Even0370 CDS CDS       | 5.0  | 1.0  | 16.5 | C | COG4657 COG2209                 | Predicted NADH:ubiquinone oxidoreductase, subunit RnfA Na <sup>+</sup> -transporting NADH:ubiquinone oxidoreductase, subunit NqrE                                                                                                                                                                       |
| TS29Rum16193 CDS CDS   | 25.0 | 5.0  | 16.5 | C | COG4624 COG1034 COG3383 COG0243 | Iron only hydrogenase large subunit, C-terminal domain NADH dehydrogenase/NADH:ubiquinone oxidoreductase 75 kD subunit (chain G) Uncharacterized anaerobic dehydrogenase Anaerobic dehydrogenases, typically selenocysteine-containing                                                                  |

|                                        |       |      |      |   |                                         |                                                                                                                                                                                                                                   |
|----------------------------------------|-------|------|------|---|-----------------------------------------|-----------------------------------------------------------------------------------------------------------------------------------------------------------------------------------------------------------------------------------|
| Ceut1181 CDS CDS                       | 5.0   | 1.0  | 16.5 | C | COG2086 COG2025                         | Electron transfer flavoprotein, beta subunit Electron transfer flavoprotein, alpha subunit                                                                                                                                        |
| TS29Bac08636 CDS CDS                   | 5.0   | 1.0  | 16.5 | C | COG2086                                 | Electron transfer flavoprotein, beta subunit                                                                                                                                                                                      |
| CspL22527 CDS CDS                      | 10.0  | 2.0  | 16.5 | C | COG1592                                 | Rubredoxin                                                                                                                                                                                                                        |
| Ehal1005 CDS CDS                       | 12.5  | 2.5  | 16.5 | C | COG1454 COG0371                         | Alcohol dehydrogenase, class IV Glycerol dehydrogenase and related enzymes                                                                                                                                                        |
| TS29Fae06617 CDS CDS                   | 10.0  | 2.0  | 16.5 | C | COG1227                                 | Inorganic pyrophosphatase/exopolyphosphatase                                                                                                                                                                                      |
| Rtor1197 CDS CDS                       | 2.5   | 0.5  | 16.5 | C | COG1145                                 | Ferredoxin                                                                                                                                                                                                                        |
| Msmi751669 CDS CDS                     | 1.7   | 0.3  | 16.5 | C | COG0680                                 | Ni,Fe-hydrogenase maturation factor                                                                                                                                                                                               |
| ShigspD90648 CDS CDS                   | 5.0   | 1.0  | 16.5 | C | COG0578                                 | Glycerol-3-phosphate dehydrogenase                                                                                                                                                                                                |
| Rlac1416 CDS CDS                       | 5.0   | 1.0  | 16.5 | C | COG0282                                 | Acetate kinase                                                                                                                                                                                                                    |
| TS28Ali2046 CDS CDS                    | 59.0  | 12.0 | 16.3 | C | COG1951 COG1838                         | Tartrate dehydratase alpha subunit Fumarate hydratase class I, N-terminal domain Tartrate dehydratase beta subunit Fumarate hydratase class I, C-terminal domain                                                                  |
| Msmi740380 CDS CDS                     | 11.1  | 2.3  | 16.0 | C | COG1145                                 | Ferredoxin                                                                                                                                                                                                                        |
| TS28Met1386 CDS CDS                    | 52.5  | 10.8 | 16.0 | C | COG3259 COG0374 COG3261                 | Coenzyme F420-reducing hydrogenase, alpha subunit Ni,Fe-hydrogenase I large subunit Ni,Fe-hydrogenase III large subunit                                                                                                           |
| Bova4234 CDS CDS                       | 2.8   | 0.6  | 15.6 | C | COG1882                                 | Pyruvate-formate lyase                                                                                                                                                                                                            |
| TS28Met0462 CDS CDS                    | 102.3 | 21.8 | 15.5 | C | COG0426 COG0446 COG1773 COG1853         | Uncharacterized flavoproteins Uncharacterized NAD(FAD)-dependent dehydrogenases Rubredoxin Conserved protein/domain typically associated with flavoprotein oxygenases, DIM6/NTAB family                                           |
| Bdor0110 CDS CDS                       | 7.0   | 1.5  | 15.4 | C | COG2086                                 | Electron transfer flavoprotein, beta subunit                                                                                                                                                                                      |
| Clep1991 CDS CDS                       | 2.3   | 0.5  | 15.4 | C | COG1883                                 | Na <sup>+</sup> -transporting methylmalonyl-CoA/oxaloacetate decarboxylase, beta subunit                                                                                                                                          |
| Msmi750174 CDS CDS                     | 5.8   | 1.3  | 15.3 | C | COG0221                                 | Inorganic pyrophosphatase                                                                                                                                                                                                         |
| Bste1806 CDS CDS                       | 18.5  | 4.0  | 15.3 | C | COG1014 COG0674                         | Pyruvate:ferredoxin oxidoreductase and related 2-oxoacid:ferredoxin oxidoreductases, gamma subunit Pyruvate:ferredoxin oxidoreductase and related 2-oxoacid:ferredoxin oxidoreductases, alpha subunit                             |
| Msmi750432 CDS CDS                     | 4.6   | 1.0  | 15.2 | C | COG0479 COG0247 COG1139 COG0277 COG2048 | Succinate dehydrogenase/fumarate reductase, Fe-S protein subunit Fe-S oxidoreductase Uncharacterized conserved protein containing a ferredoxin-like domain FAD/FMN-containing dehydrogenases Heterodisulfide reductase, subunit B |
| TS29Bac07222 CDS CDS                   | 4.5   | 1.0  | 14.9 | C | COG1951 COG1838                         | Tartrate dehydratase alpha subunit Fumarate hydratase class I, N-terminal domain Tartrate dehydratase beta subunit Fumarate hydratase class I, C-terminal domain                                                                  |
| Clep0233 CDS CDS                       | 9.0   | 2.0  | 14.9 | C | COG0240                                 | Glycerol-3-phosphate dehydrogenase                                                                                                                                                                                                |
| TS28Rum13071 CDS CDS                   | 49.5  | 11.0 | 14.9 | C | COG0055                                 | F0F1-type ATP synthase, beta subunit                                                                                                                                                                                              |
| TS29Met0325 CDS CDS                    | 4.4   | 1.0  | 14.6 | C | COG4074 COG4007                         | H2-forming N5,N10-methylenetetrahydromethanopterin dehydrogenase Predicted dehydrogenase related to H2-forming N5,N10-methylenetetrahydromethanopterin dehydrogenase                                                              |
| Msmi751478 CDS CDS                     | 7.3   | 1.7  | 14.6 | C | COG1014 COG1144                         | Pyruvate:ferredoxin oxidoreductase and related 2-oxoacid:ferredoxin oxidoreductases, gamma subunit Pyruvate:ferredoxin oxidoreductase and related 2-oxoacid:ferredoxin oxidoreductases, delta subunit                             |
| TS28Met0320 CDS CDS                    | 7.3   | 1.7  | 14.6 | C | COG1014 COG1144                         | Pyruvate:ferredoxin oxidoreductase and related 2-oxoacid:ferredoxin oxidoreductases, gamma subunit Pyruvate:ferredoxin oxidoreductase and related 2-oxoacid:ferredoxin oxidoreductases, delta subunit                             |
| TS28Rum13272 CDS CDS                   | 26.0  | 6.0  | 14.3 | C | COG2069                                 | CO dehydrogenase/acetyl-CoA synthase delta subunit (corrinoid Fe-S protein)                                                                                                                                                       |
| TS29Bac00722 CDS CDS                   | 13.0  | 3.0  | 14.3 | C | COG0711                                 | F0F1-type ATP synthase, subunit b                                                                                                                                                                                                 |
| ShigspD92811 CDS CDS                   | 4.3   | 1.0  | 14.3 | C | COG0243                                 | Anaerobic dehydrogenases, typically selenocysteine-containing                                                                                                                                                                     |
| Bdor2463 CDS CDS                       | 17.0  | 4.0  | 14.1 | C | COG1726                                 | Na <sup>+</sup> -transporting NADH:ubiquinone oxidoreductase, subunit NqrA                                                                                                                                                        |
| Msmi740984 CDS CDS                     | 3.5   | 0.8  | 13.9 | C | COG0535 COG2710                         | Predicted Fe-S oxidoreductases Nitrogenase molybdenum-iron protein, alpha and beta chains                                                                                                                                         |
| Pmer1521 CDS CDS                       | 21.0  | 5.0  | 13.9 | C | COG0039                                 | Malate/lactate dehydrogenases                                                                                                                                                                                                     |
| Msmi750982 CDS CDS                     | 4.9   | 1.2  | 13.7 | C | COG2037                                 | Formylmethanofuran:tetrahydromethanopterin formyltransferase                                                                                                                                                                      |
| Rtor0314 CDS CDS                       | 27.0  | 6.5  | 13.7 | C | COG1592                                 | Rubredoxin                                                                                                                                                                                                                        |
| TS28Bac7105 CDS CDS                    | 84.7  | 20.5 | 13.7 | C | COG0039                                 | Malate/lactate dehydrogenases                                                                                                                                                                                                     |
| Cbo15612 CDS CDS                       | 8.0   | 2.0  | 13.2 | C | COG3808                                 | Inorganic pyrophosphatase                                                                                                                                                                                                         |
| Pmer3423 CDS CDS                       | 20.0  | 5.0  | 13.2 | C | COG2086                                 | Electron transfer flavoprotein, beta subunit                                                                                                                                                                                      |
| Csci3049 CDS CDS                       | 4.0   | 1.0  | 13.2 | C | COG1902                                 | NADH:flavin oxidoreductases, Old Yellow Enzyme family                                                                                                                                                                             |
| Bryfor0567 CDS CDS                     | 4.0   | 1.0  | 13.2 | C | COG1853 COG0446 COG1773 COG0426         | Conserved protein/domain typically associated with flavoprotein oxygenases, DIM6/NTAB family Uncharacterized NAD(FAD)-dependent dehydrogenases Rubredoxin Uncharacterized flavonoteins                                            |
| DpigATC1526 CDS CDS                    | 2.0   | 0.5  | 13.2 | C | COG1757                                 | Na <sup>+</sup> /H <sup>+</sup> antiporter                                                                                                                                                                                        |
| DpigGOR12032 CDS CDS                   | 2.0   | 0.5  | 13.2 | C | COG1757                                 | Na <sup>+</sup> /H <sup>+</sup> antiporter                                                                                                                                                                                        |
| Csvm1675 CDS CDS                       | 8.0   | 2.0  | 13.2 | C | COG1625                                 | Fe-S oxidoreductase, related to NifB/MoaA family                                                                                                                                                                                  |
| Msmi750596 CDS CDS                     | 1.3   | 0.3  | 13.2 | C | COG1304                                 | L-lactate dehydrogenase (FMN-dependent) and related alpha-hydroxy acid dehydrogenases                                                                                                                                             |
| Pmer1757 CDS CDS                       | 2.0   | 0.5  | 13.2 | C | COG1139                                 | Uncharacterized conserved protein containing a ferredoxin-like domain                                                                                                                                                             |
| TS29Dor2147 CDS CDS                    | 4.0   | 1.0  | 13.2 | C | COG1014 COG4231 COG1146                 | Pyruvate:ferredoxin oxidoreductase and related 2-oxoacid:ferredoxin oxidoreductases, gamma subunit Indolepyruvate ferredoxin oxidoreductase, alpha and beta subunits Ferredoxin                                                   |
| TS29Fae09988 CDS CDS                   | 2.0   | 0.5  | 13.2 | C | COG0667 COG1453                         | Predicted oxidoreductases (related to aryl-alcohol dehydrogenases) Predicted oxidoreductases of the aldo/keto reductase family                                                                                                    |
| Cbo14815 CDS CDS                       | 4.0   | 1.0  | 13.2 | C | COG0554                                 | Glycerol kinase                                                                                                                                                                                                                   |
| b0727 CDS dihydrolipeoyltranssuccinase | 4.0   | 1.0  | 13.2 | C | COG0508                                 | Pyruvate/2-oxoglutarate dehydrogenase complex, dihydrolipeamide acyltransferase (E2) component, and related enzymes                                                                                                               |
| TS29RumUnc1452 CDS CDS                 | 2.0   | 0.5  | 13.2 | C | COG0348                                 | Polyferredoxin                                                                                                                                                                                                                    |
| TS28Rum06565 CDS CDS                   | 8.0   | 2.0  | 13.2 | C | COG0280                                 | Phosphotransacetylase                                                                                                                                                                                                             |
| BactD20745 CDS CDS                     | 2.0   | 0.5  | 13.2 | C | COG0045                                 | Succinyl-CoA synthetase, beta subunit                                                                                                                                                                                             |
| Bova1894 CDS CDS                       | 2.0   | 0.5  | 13.2 | C | COG0045                                 | Succinyl-CoA synthetase, beta subunit                                                                                                                                                                                             |

|                      |      |      |      |   |                                 |                                                                                                                                                                                                                                                                                                         |
|----------------------|------|------|------|---|---------------------------------|---------------------------------------------------------------------------------------------------------------------------------------------------------------------------------------------------------------------------------------------------------------------------------------------------------|
| Msmi741609 CDS CDS   | 5.8  | 1.5  | 12.9 | C | COG2033                         | Desulfoferrodoxin                                                                                                                                                                                                                                                                                       |
| Msmi750106 CDS CDS   | 5.8  | 1.5  | 12.9 | C | COG2033                         | Desulfoferrodoxin                                                                                                                                                                                                                                                                                       |
| TS28Met0585 CDS CDS  | 5.8  | 1.5  | 12.9 | C | COG2033                         | Desulfoferrodoxin                                                                                                                                                                                                                                                                                       |
| Msmi750151 CDS CDS   | 13.5 | 3.5  | 12.8 | C | COG1853 COG0446 COG1773 COG0426 | Conserved protein/domain typically associated with flavoprotein oxygenases, DIM6/NTAB family Uncharacterized NAD(FAD)-dependent dehydrogenases Rubredoxin Uncharacterized flavonoproteins                                                                                                               |
| Pmer2122 CDS CDS     | 38.5 | 10.0 | 12.7 | C | COG1048                         | Aconitase A                                                                                                                                                                                                                                                                                             |
| Bste1812 CDS CDS     | 17.3 | 4.5  | 12.7 | C | COG1866                         | Phosphoenolpyruvate carboxykinase (ATP)                                                                                                                                                                                                                                                                 |
| TS28Ali1921 CDS CDS  | 23.0 | 6.0  | 12.7 | C | COG0039                         | Malate/lactate dehydrogenases                                                                                                                                                                                                                                                                           |
| DpigGOR11331 CDS CDS | 7.0  | 1.8  | 12.6 | C | COG1014 COG1013 COG0674         | Pyruvate:ferredoxin oxidoreductase and related 2-oxoacid:ferredoxin oxidoreductases, gamma subunit Pyruvate:ferredoxin oxidoreductase and related 2-oxoacid:ferredoxin oxidoreductases, beta subunit Pyruvate:ferredoxin oxidoreductase and related 2-oxoacid:ferredoxin oxidoreductases, alpha subunit |
| Pmer2746 CDS CDS     | 19.0 | 5.0  | 12.6 | C | COG1271                         | Cytochrome bd-type quinol oxidase, subunit 1                                                                                                                                                                                                                                                            |
| Bfm3327 CDS CDS      | 11.3 | 3.0  | 12.5 | C | COG5016 COG1038                 | Pyruvate/oxaloacetate carboxyltransferase Pyruvate carboxylase                                                                                                                                                                                                                                          |
| Bdor4119 CDS CDS     | 18.5 | 5.0  | 12.2 | C | COG1979 COG1454                 | Uncharacterized oxidoreductases, Fe-dependent alcohol dehydrogenase family Alcohol dehydrogenase, class IV                                                                                                                                                                                              |
| TS28Fae21632 CDS CDS | 11.0 | 3.0  | 12.1 | C | COG1014 COG0674                 | Pyruvate:ferredoxin oxidoreductase and related 2-oxoacid:ferredoxin oxidoreductases, gamma subunit Pyruvate:ferredoxin oxidoreductase and related 2-oxoacid:ferredoxin oxidoreductases, alpha subunit                                                                                                   |
| BactD11824 CDS CDS   | 1.8  | 0.5  | 12.1 | C | COG0224                         | FOF1-type ATP synthase, gamma subunit                                                                                                                                                                                                                                                                   |
| TS28Bac1044 CDS CDS  | 5.5  | 1.5  | 12.1 | C | COG0039                         | Malate/lactate dehydrogenases                                                                                                                                                                                                                                                                           |
| BactD11151 CDS CDS   | 2.4  | 0.7  | 12.0 | C | COG0039                         | Malate/lactate dehydrogenases                                                                                                                                                                                                                                                                           |
| Bxyl1549 CDS CDS     | 2.4  | 0.7  | 12.0 | C | COG0039                         | Malate/lactate dehydrogenases                                                                                                                                                                                                                                                                           |
| TS29Bac00404 CDS CDS | 2.4  | 0.7  | 12.0 | C | COG0039                         | Malate/lactate dehydrogenases                                                                                                                                                                                                                                                                           |
| TS29Rum03322 CDS CDS | 28.5 | 8.0  | 11.8 | C | COG0554                         | Glycerol kinase                                                                                                                                                                                                                                                                                         |
| TS29Met0210 CDS CDS  | 2.6  | 0.7  | 11.7 | C | COG1269                         | Archaeal/vacuolar-type H <sup>+</sup> -ATPase subunit 1                                                                                                                                                                                                                                                 |
| Buni1807 CDS CDS     | 7.0  | 2.0  | 11.6 | C | COG2869                         | Na <sup>+</sup> -transporting NADH:ubiquinone oxidoreductase, subunit NtrC                                                                                                                                                                                                                              |
| TS29Bac07428 CDS CDS | 7.0  | 2.0  | 11.6 | C | COG1883                         | Na <sup>+</sup> -transporting methylmalonyl-CoA/oxaloacetate decarboxylase, beta subunit                                                                                                                                                                                                                |
| TS28Clo06483 CDS CDS | 3.5  | 1.0  | 11.6 | C | COG1145                         | Ferredoxin                                                                                                                                                                                                                                                                                              |
| CspM6210241 CDS CDS  | 17.5 | 5.0  | 11.6 | C | COG1014 COG1013 COG0674         | Pyruvate:ferredoxin oxidoreductase and related 2-oxoacid:ferredoxin oxidoreductases, gamma subunit Pyruvate:ferredoxin oxidoreductase and related 2-oxoacid:ferredoxin oxidoreductases, beta subunit Pyruvate:ferredoxin oxidoreductase and related 2-oxoacid:ferredoxin oxidoreductases, alpha subunit |
| Casp3082 CDS CDS     | 7.0  | 2.0  | 11.6 | C | COG1014 COG1013                 | Pyruvate:ferredoxin oxidoreductase and related 2-oxoacid:ferredoxin oxidoreductases, gamma subunit Pyruvate:ferredoxin oxidoreductase and related 2-oxoacid:ferredoxin oxidoreductases, beta subunit                                                                                                    |
| TS28Par1667 CDS CDS  | 7.0  | 2.0  | 11.6 | C | COG0240                         | Glycerol-3-phosphate dehydrogenase                                                                                                                                                                                                                                                                      |
| Pmer2954 CDS CDS     | 7.0  | 2.0  | 11.6 | C | COG0039                         | Malate/lactate dehydrogenases                                                                                                                                                                                                                                                                           |
| Msmi750516 CDS CDS   | 2.3  | 0.7  | 11.6 | C | COG0240                         | Glycerol-3-phosphate dehydrogenase                                                                                                                                                                                                                                                                      |
| Msmi751292 CDS CDS   | 26.6 | 7.6  | 11.5 | C | COG3383 COG0243                 | Uncharacterized anaerobic dehydrogenase Anaerobic dehydrogenases, typically selenocysteine-containing                                                                                                                                                                                                   |
| Msmi740385 CDS CDS   | 26.6 | 7.6  | 11.5 | C | COG3383 COG0243                 | Uncharacterized anaerobic dehydrogenase Anaerobic dehydrogenases, typically selenocysteine-containing                                                                                                                                                                                                   |
| Bxyl0179 CDS CDS     | 1.7  | 0.5  | 11.5 | C | COG1032                         | Fe-S oxidoreductase                                                                                                                                                                                                                                                                                     |
| TS28Met1367 CDS CDS  | 9.5  | 2.8  | 11.4 | C | COG0716                         | Flavodoxins                                                                                                                                                                                                                                                                                             |
| Msmi740667 CDS CDS   | 22.2 | 6.7  | 11.0 | C | COG1941                         | Coenzyme F420-reducing hydrogenase, gamma subunit                                                                                                                                                                                                                                                       |
| TS28Met1384 CDS CDS  | 22.2 | 6.7  | 11.0 | C | COG1941                         | Coenzyme F420-reducing hydrogenase, gamma subunit                                                                                                                                                                                                                                                       |
| TS29Bac04589 CDS CDS | 3.3  | 1.0  | 11.0 | C | COG5016 COG1038                 | Pyruvate/oxaloacetate carboxyltransferase Pyruvate carboxylase                                                                                                                                                                                                                                          |
| TS29Bac10441 CDS CDS | 1.7  | 0.5  | 11.0 | C | COG3808                         | Inorganic pyrophosphatase                                                                                                                                                                                                                                                                               |
| Bdor2178 CDS CDS     | 3.3  | 1.0  | 11.0 | C | COG1394                         | Archaeal/vacuolar-type H <sup>+</sup> -ATPase subunit D                                                                                                                                                                                                                                                 |
| Clep0151 CDS CDS     | 5.0  | 1.5  | 11.0 | C | COG1249                         | Pyruvate/2-oxoglutarate dehydrogenase complex, dihydrolipoamide dehydrogenase (E3) component, and related enzymes                                                                                                                                                                                       |
| Pmer2912 CDS CDS     | 36.0 | 11.0 | 10.8 | C | COG4249 COG3005 COG1262         | Uncharacterized protein containing caspase domain Nitrate/TMAO reductases, membrane-bound tetraheme cytochrome c subunit Uncharacterized conserved protein                                                                                                                                              |
| Msmi740377 CDS CDS   | 18.8 | 5.8  | 10.7 | C | COG3383 COG0243 COG1029         | Uncharacterized anaerobic dehydrogenase Anaerobic dehydrogenases, typically selenocysteine-containing Formylmethanofuran dehydrogenase subunit B                                                                                                                                                        |
| TS28Met1302 CDS CDS  | 23.3 | 7.3  | 10.6 | C | COG2048 COG0247 COG1150         | Heterodisulfide reductase, subunit B Fe-S oxidoreductase Heterodisulfide reductase, subunit C                                                                                                                                                                                                           |
| Ehal0870 CDS CDS     | 11.0 | 3.5  | 10.4 | C | COG1592                         | Rubrerhythrin                                                                                                                                                                                                                                                                                           |
| TS29Bac08242 CDS CDS | 4.7  | 1.5  | 10.3 | C | COG1014 COG0674                 | Pyruvate:ferredoxin oxidoreductase and related 2-oxoacid:ferredoxin oxidoreductases, gamma subunit Pyruvate:ferredoxin oxidoreductase and related 2-oxoacid:ferredoxin oxidoreductases, alpha subunit                                                                                                   |
| TS28Met0619 CDS CDS  | 5.0  | 1.6  | 10.2 | C | COG0377 COG3260                 | NADH:ubiquinone oxidoreductase 20 kD subunit and related Fe-S oxidoreductases Ni, Fe-hydrogenase III small subunit                                                                                                                                                                                      |
| Msmi750034 CDS CDS   | 5.0  | 1.6  | 10.2 | C | COG0377 COG3260                 | NADH:ubiquinone oxidoreductase 20 kD subunit and related Fe-S oxidoreductases Ni, Fe-hydrogenase III small subunit                                                                                                                                                                                      |
| TS28Fae15593 CDS CDS | 43.3 | 14.0 | 10.2 | C | COG1592                         | Rubrerhythrin                                                                                                                                                                                                                                                                                           |
| Buni3211 CDS CDS     | 1.5  | 0.5  | 10.1 | C | COG0479                         | Succinate dehydrogenase/fumarate reductase, Fe-S protein subunit                                                                                                                                                                                                                                        |
| TS29Bac07678 CDS CDS | 1.5  | 0.5  | 10.1 | C | COG0479                         | Succinate dehydrogenase/fumarate reductase, Fe-S protein subunit                                                                                                                                                                                                                                        |
| TS28Met0473 CDS CDS  | 97.6 | 32.2 | 10.0 | C | COG1148 COG1908                 | Heterodisulfide reductase, subunit A and related polyferredoxins Coenzyme F420-reducing hydrogenase, delta subunit                                                                                                                                                                                      |
| TS28Eub8500 CDS CDS  | 2.0  | 67.0 | 0.1  | C | COG1319                         | Aerobic-type carbon monoxide dehydrogenase, middle subunit CoxM/CutM homologs                                                                                                                                                                                                                           |
| TS28Fae14018 CDS CDS | 1.0  | 33.5 | 0.1  | C | COG1304                         | L-lactate dehydrogenase (FMN-dependent) and related alpha-hydroxy acid dehydrogenases                                                                                                                                                                                                                   |

|                           |      |       |       |     |                                 |                                                                                                                                                                                                                      |
|---------------------------|------|-------|-------|-----|---------------------------------|----------------------------------------------------------------------------------------------------------------------------------------------------------------------------------------------------------------------|
| TS28Clo10196 CDS CDS      | 1.0  | 34.0  | 0.1   | C   | COG1454 COG1012                 | Alcohol dehydrogenase, class IV NAD-dependent aldehyde dehydrogenases                                                                                                                                                |
| TS28Fae12159 CDS CDS      | 1.0  | 34.0  | 0.1   | C   | COG0778                         | Nitroreductase                                                                                                                                                                                                       |
| TS28Clo10316 CDS CDS      | 0.5  | 17.0  | 0.1   | C   | COG0056                         | F0F1-type ATP synthase, alpha subunit                                                                                                                                                                                |
| TS28Par1621 CDS CDS       | 0.3  | 11.5  | 0.1   | C   | COG1014 COG0674                 | Pyruvate:ferredoxin oxidoreductase and related 2-oxoacid:ferredoxin oxidoreductases, gamma subunit Pyruvate:ferredoxin oxidoreductase and related 2-oxoacid:ferredoxin oxidoreductases, alpha subunit                |
| Bova2002 CDS CDS          | 0.2  | 7.3   | 0.1   | C   | COG1053                         | Succinate dehydrogenase/fumarate reductase, flavoprotein subunit                                                                                                                                                     |
| TS28Eub1117 CDS CDS       | 1.5  | 55.0  | 0.1   | C   | COG0224                         | F0F1-type ATP synthase, gamma subunit                                                                                                                                                                                |
| TS28Bac6247 CDS CDS       | 0.5  | 18.5  | 0.1   | C   | COG0731 COG4004                 | Fe-S oxidoreductases Uncharacterized protein conserved in archaea                                                                                                                                                    |
| TS29Rum13450 CDS CDS      | 0.8  | 28.8  | 0.1   | C   | COG1866                         | Phosphoenolpyruvate carboxykinase (ATP)                                                                                                                                                                              |
| TS28Fae18800 CDS CDS      | 1.0  | 38.5  | 0.1   | C   | COG0372                         | Citrate synthase                                                                                                                                                                                                     |
| TS28Eub7359 CDS CDS       | 0.5  | 19.5  | 0.1   | C   | COG0426 COG0446 COG1773 COG1853 | Uncharacterized flavoproteins Uncharacterized NAD(FAD)-dependent dehydrogenases Rubredoxin Conserved protein/domain typically associated with flavoprotein oxvgenases, DIM6/NTAB family                              |
| TS28Fae16148 CDS CDS      | 1.0  | 40.8  | 0.1   | C   | COG1882                         | Pyruvate-formate lyase                                                                                                                                                                                               |
| TS28Dor0088 CDS CDS       | 0.5  | 20.5  | 0.1   | C   | COG1151                         | 6Fe-6S prismane cluster-containing protein                                                                                                                                                                           |
| TS28Fae22085 CDS CDS      | 1.8  | 72.0  | 0.1   | C   | COG0372                         | Citrate synthase                                                                                                                                                                                                     |
| TS29Rum16842 CDS CDS      | 2.0  | 82.5  | 0.1   | C   | COG1454 COG1012                 | Alcohol dehydrogenase, class IV NAD-dependent aldehyde dehydrogenases                                                                                                                                                |
| TS28Clo1200 CDS CDS       | 3.0  | 135.0 | 0.1   | C   | COG0240                         | Glycerol-3-phosphate dehydrogenase                                                                                                                                                                                   |
| TS28Met1153 CDS CDS       | 0.3  | 11.3  | 0.1   | C   | COG0656 COG0667 COG1453 COG4989 | Aldo/keto reductases, related to diketoglucuronate reductase Predicted oxidoreductases (related to aryl-alcohol dehydrogenases) Predicted oxidoreductases of the aldo/keto reductase family Predicted oxidoreductase |
| Bdor1394 CDS CDS          | 0.5  | 23.0  | 0.1   | C   | COG1012 COG4230                 | NAD-dependent aldehyde dehydrogenases Delta 1-pyrroline-5-carboxylate dehydrogenase                                                                                                                                  |
| TS28Fae12060 CDS CDS      | 0.5  | 23.2  | 0.1   | C   | COG0240                         | Glycerol-3-phosphate dehydrogenase                                                                                                                                                                                   |
| TS28Eub8485 CDS CDS       | 2.3  | 111.2 | 0.1   | C   | COG1454 COG1012                 | Alcohol dehydrogenase, class IV NAD-dependent aldehyde dehydrogenases                                                                                                                                                |
| Robe0063 CDS CDS          | 0.2  | 9.8   | 0.1   | C   | COG2033                         | Desulfoferredoxin                                                                                                                                                                                                    |
| TS28Met1825 CDS CDS       | 0.3  | 13.1  | 0.1   | C   | COG0240                         | Glycerol-3-phosphate dehydrogenase                                                                                                                                                                                   |
| TS28Dor1817 CDS CDS       | 0.5  | 27.5  | 0.1   | C   | COG1882                         | Pyruvate-formate lyase                                                                                                                                                                                               |
| Dfor1725 CDS CDS          | 0.3  | 14.0  | 0.1   | C   | COG1866                         | Phosphoenolpyruvate carboxykinase (ATP)                                                                                                                                                                              |
| TS28Eub5066 CDS CDS       | 1.0  | 56.8  | 0.1   | C   | COG1035                         | Coenzyme F420-reducing hydrogenase, beta subunit                                                                                                                                                                     |
| TS29Rum20820 CDS CDS      | 1.0  | 59.5  | 0.1   | C   | COG1454                         | Alcohol dehydrogenase, class IV                                                                                                                                                                                      |
| TS28Eub5183 CDS CDS       | 0.7  | 41.0  | 0.1   | C   | COG0656 COG0667                 | Aldo/keto reductases, related to diketoglucuronate reductase Predicted oxidoreductases (related to aryl-alcohol dehydrogenases)                                                                                      |
| TS28Eub0062 CDS CDS       | 0.5  | 32.0  | 0.1   | C   | COG1882                         | Pyruvate-formate lyase                                                                                                                                                                                               |
| TS28Rum14899 CDS CDS      | 0.5  | 32.5  | 0.1   | C   | COG4656                         | Predicted NADH:ubiquinone oxidoreductase, subunit RnfC                                                                                                                                                               |
| TS28Eub1116 CDS CDS       | 1.5  | 99.5  | 0.0   | C   | COG0056                         | F0F1-type ATP synthase, alpha subunit                                                                                                                                                                                |
| TS28Eub7098 CDS CDS       | 0.5  | 35.5  | 0.0   | C   | COG4659                         | Predicted NADH:ubiquinone oxidoreductase, subunit RnfG                                                                                                                                                               |
| Bpse1690 CDS CDS          | 0.3  | 18.0  | 0.0   | C   | COG2352                         | Phosphoenolpyruvate carboxylase                                                                                                                                                                                      |
| TS28Eub4871 CDS CDS       | 0.3  | 21.0  | 0.0   | C   | COG0056 COG4933                 | F0F1-type ATP synthase, alpha subunit Uncharacterized conserved protein                                                                                                                                              |
| TS28Fae21205 CDS CDS      | 1.0  | 80.3  | 0.0   | C   | COG1757                         | Na <sup>+</sup> /H <sup>+</sup> antiporter                                                                                                                                                                           |
| TS28Rum12477 CDS CDS      | 0.3  | 27.0  | 0.0   | C   | COG2080 COG1529                 | Aerobic-type carbon monoxide dehydrogenase, small subunit CoxS/CutS homologs Aerobic-type carbon monoxide dehydrogenase, large subunit CoxL/CutL homologs                                                            |
| Robe3772 CDS CDS          | 1.0  | 82.0  | 0.0   | C   | COG1882                         | Pyruvate-formate lyase                                                                                                                                                                                               |
| TS28Rum15837 CDS CDS      | 0.3  | 28.3  | 0.0   | C   | COG1882                         | Pyruvate-formate lyase                                                                                                                                                                                               |
| TS29Rum16870 CDS CDS      | 0.3  | 28.5  | 0.0   | C   | COG0056                         | F0F1-type ATP synthase, alpha subunit                                                                                                                                                                                |
| TS28Rum11776 CDS CDS      | 0.3  | 29.0  | 0.0   | C   | COG0056                         | F0F1-type ATP synthase, alpha subunit                                                                                                                                                                                |
| TS28Clo15151 CDS CDS      | 2.0  | 183.0 | 0.0   | C   | COG0282                         | Acetate kinase                                                                                                                                                                                                       |
| TS28Fae17599 CDS CDS      | 1.0  | 92.0  | 0.0   | C   | COG1902                         | NADH:flavin oxidoreductases, Old Yellow Enzyme family                                                                                                                                                                |
| Ccom0015 CDS CDS          | 0.3  | 33.0  | 0.0   | C   | COG0372                         | Citrate synthase                                                                                                                                                                                                     |
| TS29Bif0989 CDS CDS       | 0.3  | 25.5  | 0.0   | C   | COG2352                         | Phosphoenolpyruvate carboxylase                                                                                                                                                                                      |
| TS28Clo0972 CDS CDS       | 1.0  | 108.0 | 0.0   | C   | COG0822                         | NifU homolog involved in Fe-S cluster formation                                                                                                                                                                      |
| TS28Eub8710 CDS CDS       | 0.5  | 55.0  | 0.0   | C   | COG0055                         | F0F1-type ATP synthase, beta subunit                                                                                                                                                                                 |
| TS28Fae22484 CDS CDS      | 0.3  | 37.5  | 0.0   | C   | COG1301                         | Na <sup>+</sup> /H <sup>+</sup> -dicarboxylate symporters                                                                                                                                                            |
| TS28Fae08978 CDS CDS      | 0.5  | 58.0  | 0.0   | C   | COG0281                         | Malic enzyme                                                                                                                                                                                                         |
| TS28Eub8712 CDS CDS       | 0.5  | 86.5  | 0.0   | C   | COG0056                         | F0F1-type ATP synthase, alpha subunit                                                                                                                                                                                |
| TS28Eub5054 CDS CDS       | 0.6  | 115.8 | 0.0   | C   | COG1882                         | Pyruvate-formate lyase                                                                                                                                                                                               |
| RintL10790 CDS CDS        | 0.3  | 73.8  | 0.0   | C   | COG0372                         | Citrate synthase                                                                                                                                                                                                     |
| TS28Bif3548 CDS CDS       | 0.3  | 60.5  | 0.0   | C   | COG2352                         | Phosphoenolpyruvate carboxylase                                                                                                                                                                                      |
| FpraM2121978 CDS CDS      | 7.0  | 0.5   | 46.3  | C F | COG1529 COG2080 COG4631         | Aerobic-type carbon monoxide dehydrogenase, large subunit CoxL/CutL homologs Aerobic-type carbon monoxide dehydrogenase, small subunit CoxS/CutS homologs Xanthine dehydrogenase, molybdopterin-binding subunit B    |
| Robe0280 CDS CDS          | 3.0  | 0.5   | 19.8  | C F | COG1319 COG4630                 | Aerobic-type carbon monoxide dehydrogenase, middle subunit CoxM/CutM homologs Xanthine dehydrogenase, iron-sulfur cluster and FAD-binding subunit A                                                                  |
| Bdor0776 CDS CDS          | 15.3 | 3.3   | 15.2  | C G | COG1070 COG1069                 | Sugar (pentulose and hexulose) kinases Ribulose kinase                                                                                                                                                               |
| Msmi741308 CDS CDS        | 14.1 | 0.3   | 139.7 | C I | COG1592 COG1607                 | Rubrerhythrin Acyl-CoA hydrolase                                                                                                                                                                                     |
| Msm1733 CDS rubrerhythrin | 13.8 | 0.3   | 136.4 | C I | COG1592 COG1607                 | Rubrerhythrin Acyl-CoA hydrolase                                                                                                                                                                                     |
| Msmi750375 CDS CDS        | 19.6 | 1.2   | 55.5  | C I | COG1592 COG1607                 | Rubrerhythrin Acyl-CoA hydrolase                                                                                                                                                                                     |
| Bste1935 CDS CDS          | 22.5 | 3.0   | 24.8  | C I | COG1592 COG1607                 | Rubrerhythrin Acyl-CoA hydrolase                                                                                                                                                                                     |
| TS28Clo07003 CDS CDS      | 58.0 | 8.0   | 24.0  | C I | COG1960 COG2025                 | Acyl-CoA dehydrogenases Electron transfer flavoprotein, alpha subunit                                                                                                                                                |
| Pmer2198 CDS CDS          | 26.0 | 4.0   | 21.5  | C I | COG1592 COG1607                 | Rubrerhythrin Acyl-CoA hydrolase                                                                                                                                                                                     |
| Bdor1728 CDS CDS          | 29.0 | 4.5   | 21.3  | C I | COG1592 COG1607                 | Rubrerhythrin Acyl-CoA hydrolase                                                                                                                                                                                     |
| Bxyl2120 CDS CDS          | 1.5  | 0.3   | 19.8  | C I | COG1592 COG1607                 | Rubrerhythrin Acyl-CoA hydrolase                                                                                                                                                                                     |
| BVU1137 CDS rubrerhythrin | 85.5 | 15.5  | 18.2  | C I | COG1592 COG1607                 | Rubrerhythrin Acyl-CoA hydrolase                                                                                                                                                                                     |
| TS28Fae00075 CDS CDS      | 5.0  | 1.0   | 16.5  | C I | COG5016 COG0511                 | Pyruvate/oxaloacetate carboxyltransferase Biotin carboxyl carrier protein                                                                                                                                            |
| Aco10748 CDS CDS          | 5.0  | 1.0   | 16.5  | C I | COG1592 COG1607                 | Rubrerhythrin Acyl-CoA hydrolase                                                                                                                                                                                     |
| TS28Met0851 CDS CDS       | 19.6 | 4.2   | 15.5  | C I | COG1592 COG1607                 | Rubrerhythrin Acyl-CoA hydrolase                                                                                                                                                                                     |



|                      |       |       |       |       |                                                 |                                                                                                                                                                                                                                                                                                |
|----------------------|-------|-------|-------|-------|-------------------------------------------------|------------------------------------------------------------------------------------------------------------------------------------------------------------------------------------------------------------------------------------------------------------------------------------------------|
| TS28Ahi2358 CDS CDS  | 129.0 | 32.0  | 13.3  | C I   | COG1960 COG2025                                 | Acyl-CoA dehydrogenases Electron transfer flavoprotein, alpha subunit                                                                                                                                                                                                                          |
| Bste1701 CDS CDS     | 2.0   | 0.5   | 13.2  | C I   | COG0280 COG2030 COG0857                         | Phosphotransacetylase Acyl dehydratase BioD-like N-terminal domain of phosphotransacetylase                                                                                                                                                                                                    |
| Bcap0876 CDS CDS     | 11.0  | 3.0   | 12.1  | C I   | COG1592 COG1607                                 | Rubrerhythrin Acyl-CoA hydrolase                                                                                                                                                                                                                                                               |
| CspM6212612 CDS CDS  | 18.0  | 5.0   | 11.9  | C I   | COG2025 COG1960                                 | Electron transfer flavoprotein, alpha subunit Acyl-CoA dehydrogenases                                                                                                                                                                                                                          |
| Ccom0934 CDS CDS     | 7.0   | 2.0   | 11.6  | C I   | COG2025 COG1960                                 | Electron transfer flavoprotein, alpha subunit Acyl-CoA dehydrogenases                                                                                                                                                                                                                          |
| Robe2722 CDS CDS     | 0.8   | 25.8  | 0.1   | C I   | COG1592 COG1607                                 | Rubrerhythrin Acyl-CoA hydrolase                                                                                                                                                                                                                                                               |
| Dlon2489 CDS CDS     | 0.8   | 50.3  | 0.0   | C I   | COG1592 COG1853 COG1607                         | Rubrerhythrin Conserved protein/domain typically associated with flavoprotein oxygenases, DIM6/NTAB family Acyl-CoA hydrolase                                                                                                                                                                  |
| TS28Dor1597 CDS CDS  | 0.5   | 27.5  | 0.1   | C J   | COG0060 COG1032                                 | Isoleucyl-tRNA synthetase Fe-S oxidoreductase                                                                                                                                                                                                                                                  |
| TS28Fae18589 CDS CDS | 0.5   | 19.0  | 0.1   | C K   | COG0427 COG0454                                 | Acetyl-CoA hydrolase Histone acetyltransferase HPA2 and related acetyltransferases                                                                                                                                                                                                             |
| TS29Rum18637 CDS CDS | 1.5   | 62.5  | 0.1   | C K   | COG1227 COG4109                                 | Inorganic pyrophosphatase/exopolyphosphatase Predicted transcriptional regulator containing CBS domains                                                                                                                                                                                        |
| TS28Eub8526 CDS CDS  | 0.5   | 89.5  | 0.0   | C K   | COG1227 COG4109                                 | Inorganic pyrophosphatase/exopolyphosphatase Predicted transcriptional regulator containing CBS domains                                                                                                                                                                                        |
| Msmi751486 CDS CDS   | 14.5  | 0.3   | 191.8 | C O   | COG0526                                         | Thiol-disulfide isomerase and thioredoxins                                                                                                                                                                                                                                                     |
| BactD12232 CDS CDS   | 21.5  | 0.5   | 142.2 | C O   | COG0526 COG3118                                 | Thiol-disulfide isomerase and thioredoxins Thioredoxin domain-containing protein                                                                                                                                                                                                               |
| BactD13066 CDS CDS   | 9.7   | 0.3   | 95.9  | C O   | COG0526 COG3118                                 | Thiol-disulfide isomerase and thioredoxins Thioredoxin domain-containing protein                                                                                                                                                                                                               |
| Bxy13872 CDS CDS     | 9.7   | 0.3   | 95.9  | C O   | COG0526 COG3118                                 | Thiol-disulfide isomerase and thioredoxins Thioredoxin domain-containing protein                                                                                                                                                                                                               |
| Msmi740194 CDS CDS   | 14.5  | 1.3   | 38.4  | C O   | COG0526                                         | Thiol-disulfide isomerase and thioredoxins                                                                                                                                                                                                                                                     |
| Dfor0624 CDS CDS     | 31.0  | 3.0   | 34.2  | C O   | COG0526 COG0492                                 | Thiol-disulfide isomerase and thioredoxins Thioredoxin reductase                                                                                                                                                                                                                               |
| Ccom1705 CDS CDS     | 10.0  | 1.0   | 33.1  | C O   | COG0526 COG0492                                 | Thiol-disulfide isomerase and thioredoxins Thioredoxin reductase                                                                                                                                                                                                                               |
| Pmer3165 CDS CDS     | 17.5  | 2.0   | 28.9  | C O   | COG0778 COG1225                                 | Nitroreductase Peroxiredoxin                                                                                                                                                                                                                                                                   |
| Dfor0623 CDS CDS     | 6.5   | 1.0   | 21.5  | C O   | COG0526                                         | Thiol-disulfide isomerase and thioredoxins                                                                                                                                                                                                                                                     |
| Dfor2070 CDS CDS     | 12.0  | 2.0   | 19.8  | C O   | COG0526 COG0492                                 | Thiol-disulfide isomerase and thioredoxins Thioredoxin reductase                                                                                                                                                                                                                               |
| Cbo12856 CDS CDS     | 6.0   | 1.0   | 19.8  | C O   | COG0526                                         | Thiol-disulfide isomerase and thioredoxins                                                                                                                                                                                                                                                     |
| Bxy14091 CDS CDS     | 8.5   | 1.5   | 18.7  | C O   | COG0526 COG3118                                 | Thiol-disulfide isomerase and thioredoxins Thioredoxin domain-containing protein                                                                                                                                                                                                               |
| Bfin3687 CDS CDS     | 5.6   | 1.0   | 18.6  | C O   | COG0526 COG3634 COG0492                         | Thiol-disulfide isomerase and thioredoxins Alkyl hydroperoxide reductase, large subunit Thioredoxin reductase                                                                                                                                                                                  |
| ShigspD91265 CDS CDS | 5.5   | 1.0   | 18.2  | C O   | COG4232 COG4233                                 | Thiol-disulfide interchange protein Uncharacterized protein predicted to be involved in C-type cytochrome biogenesis                                                                                                                                                                           |
| Dfor2069 CDS CDS     | 8.5   | 2.0   | 14.1  | C O   | COG0526                                         | Thiol-disulfide isomerase and thioredoxins                                                                                                                                                                                                                                                     |
| Bste2939 CDS CDS     | 8.0   | 2.0   | 13.2  | C O   | COG0526 COG0492                                 | Thiol-disulfide isomerase and thioredoxins Thioredoxin reductase                                                                                                                                                                                                                               |
| Rtor1258 CDS CDS     | 4.0   | 1.0   | 13.2  | C O   | COG0526                                         | Thiol-disulfide isomerase and thioredoxins                                                                                                                                                                                                                                                     |
| Bega0694 CDS CDS     | 4.0   | 1.0   | 13.2  | C O   | COG0526                                         | Thiol-disulfide isomerase and thioredoxins                                                                                                                                                                                                                                                     |
| Bdor0648 CDS CDS     | 13.5  | 3.5   | 12.8  | C O   | COG0526                                         | Thiol-disulfide isomerase and thioredoxins                                                                                                                                                                                                                                                     |
| Bdor2834 CDS CDS     | 10.5  | 3.0   | 11.6  | C O   | COG0526 COG3118                                 | Thiol-disulfide isomerase and thioredoxins Thioredoxin domain-containing protein                                                                                                                                                                                                               |
| Pmer2351 CDS CDS     | 26.0  | 8.0   | 10.7  | C O   | COG0526                                         | Thiol-disulfide isomerase and thioredoxins                                                                                                                                                                                                                                                     |
| Bdor1370 CDS CDS     | 24.5  | 8.0   | 10.1  | C O   | COG0526 COG0492                                 | Thiol-disulfide isomerase and thioredoxins Thioredoxin reductase                                                                                                                                                                                                                               |
| TS28Rum05867 CDS CDS | 0.3   | 13.2  | 0.1   | C P   | COG0426 COG0446 COG1773 COG1853 COG1251 COG2146 | Uncharacterized flavoproteins Uncharacterized NAD(FAD)-dependent dehydrogenases Rubredoxin Conserved protein/domain typically associated with flavoprotein oxygenases, DIM6/NTAB family NAD(P)H-nitrite reductase Ferredoxin subunits of nitrite reductase and ring-hydroxylating dioxygenases |
| TS29Rum12353 CDS CDS | 19.8  | 4.0   | 16.3  | C Q   | COG4577                                         | Carbon dioxide concentrating mechanism/carboxysome shell protein                                                                                                                                                                                                                               |
| TS29Rum18424 CDS CDS | 4.0   | 1.0   | 13.2  | C Q   | COG4577                                         | Carbon dioxide concentrating mechanism/carboxysome shell protein                                                                                                                                                                                                                               |
| Robe3277 CDS CDS     | 2.0   | 0.5   | 13.2  | C Q   | COG4577                                         | Carbon dioxide concentrating mechanism/carboxysome shell protein                                                                                                                                                                                                                               |
| TS29Rum00111 CDS CDS | 3.8   | 1.0   | 12.4  | C Q   | COG4577                                         | Carbon dioxide concentrating mechanism/carboxysome shell protein                                                                                                                                                                                                                               |
| Pmer2833 CDS CDS     | 5.0   | 1.5   | 11.0  | C Q   | COG0282 COG4869                                 | Acetate kinase Propanediol utilization protein                                                                                                                                                                                                                                                 |
| Clep0939 CDS CDS     | 10.0  | 3.0   | 11.0  | C V O | COG1132 COG4988 COG5265                         | ABC-type multidrug transport system, ATPase and permease components ABC-type transport system involved in cytochrome bd biosynthesis, ATPase and permease components ABC-type transport system involved in Fe-S cluster assembly, permease and ATPase components                               |
| Msmi751409 CDS CDS   | 17.0  | 0.5   | 112.4 | D     | COG0206                                         | Cell division GTPase                                                                                                                                                                                                                                                                           |
| Ehal1927 CDS CDS     | 8.0   | 0.5   | 52.9  | D     | COG0772                                         | Bacterial cell division membrane protein                                                                                                                                                                                                                                                       |
| Acae2925 CDS CDS     | 9.0   | 1.0   | 29.8  | D     | COG1077                                         | Actin-like ATPase involved in cell morphogenesis                                                                                                                                                                                                                                               |
| Bthe3730956 CDS CDS  | 2.3   | 0.3   | 23.1  | D     | COG1192                                         | ATPases involved in chromosome partitioning                                                                                                                                                                                                                                                    |
| TS29Bac09389 CDS CDS | 2.3   | 0.3   | 23.1  | D     | COG0772                                         | Bacterial cell division membrane protein                                                                                                                                                                                                                                                       |
| Cspi1479 CDS CDS     | 7.0   | 1.0   | 23.1  | D     | COG0206                                         | Cell division GTPase                                                                                                                                                                                                                                                                           |
| TS29Rum13370 CDS CDS | 6.5   | 1.0   | 21.5  | D     | COG3640                                         | CO dehydrogenase maturation factor                                                                                                                                                                                                                                                             |
| Cste1263 CDS CDS     | 6.0   | 1.0   | 19.8  | D     | COG1196                                         | Chromosome segregation ATPases                                                                                                                                                                                                                                                                 |
| TS29Rum17370 CDS CDS | 5.0   | 1.0   | 16.5  | D     | COG3640                                         | CO dehydrogenase maturation factor                                                                                                                                                                                                                                                             |
| Rbro0823 CDS CDS     | 3.3   | 0.8   | 13.2  | D     | COG0772                                         | Bacterial cell division membrane protein                                                                                                                                                                                                                                                       |
| Rbro0827 CDS CDS     | 2.0   | 0.5   | 13.2  | D     | COG0206                                         | Cell division GTPase                                                                                                                                                                                                                                                                           |
| Bdor2885 CDS CDS     | 19.3  | 5.0   | 12.8  | D     | COG1077                                         | Actin-like ATPase involved in cell morphogenesis                                                                                                                                                                                                                                               |
| TS29Fae08269 CDS CDS | 3.8   | 1.0   | 12.4  | D     | COG0037                                         | Predicted ATPase of the PP-loop superfamily implicated in cell cycle control                                                                                                                                                                                                                   |
| Pmer0601 CDS CDS     | 15.0  | 4.0   | 12.4  | D     | COG0037                                         | Predicted ATPase of the PP-loop superfamily implicated in cell cycle control                                                                                                                                                                                                                   |
| Msmi740271 CDS CDS   | 14.3  | 4.2   | 11.4  | D     | COG0206                                         | Cell division GTPase                                                                                                                                                                                                                                                                           |
| TS28Clo00864 CDS CDS | 11.0  | 377.0 | 0.1   | D     | COG1196                                         | Chromosome segregation ATPases                                                                                                                                                                                                                                                                 |

|                      |       |      |       |       |                         |                                                                                                                                                                                                                  |
|----------------------|-------|------|-------|-------|-------------------------|------------------------------------------------------------------------------------------------------------------------------------------------------------------------------------------------------------------|
| TS28Rum00313 CDS CDS | 0.7   | 23.5 | 0.1   | D     | COG0206                 | Cell division GTPase                                                                                                                                                                                             |
| TS28Bif337 CDS CDS   | 0.3   | 9.0  | 0.1   | D     | COG1674                 | DNA segregation ATPase FtsK/SpoIIIE and related proteins                                                                                                                                                         |
| TS28Fae18143 CDS CDS | 1.5   | 55.0 | 0.1   | D     | COG1192                 | ATPases involved in chromosome partitioning                                                                                                                                                                      |
| TS29Fae00047 CDS CDS | 1.5   | 55.0 | 0.1   | D     | COG1192                 | ATPases involved in chromosome partitioning                                                                                                                                                                      |
| FpraM2122628 CDS CDS | 0.3   | 13.0 | 0.1   | D     | COG1196                 | Chromosome segregation ATPases                                                                                                                                                                                   |
| TS28Eub3834 CDS CDS  | 1.5   | 64.0 | 0.1   | D     | COG5279                 | Uncharacterized protein involved in cytokinesis, contains TGc (transglutaminase/protease-like) domain                                                                                                            |
| TS28Fae22190 CDS CDS | 1.0   | 44.0 | 0.1   | D     | COG0772                 | Bacterial cell division membrane protein                                                                                                                                                                         |
| TS29Rum13418 CDS CDS | 1.0   | 49.0 | 0.1   | D     | COG5279                 | Uncharacterized protein involved in cytokinesis, contains TGc (transglutaminase/protease-like) domain                                                                                                            |
| TS28Rum01062 CDS CDS | 1.0   | 56.8 | 0.1   | D     | COG2184                 | Protein involved in cell division                                                                                                                                                                                |
| TS28Dor1185 CDS CDS  | 0.5   | 34.5 | 0.0   | D     | COG1196                 | Chromosome segregation ATPases                                                                                                                                                                                   |
| TS28Fae15959 CDS CDS | 0.5   | 35.0 | 0.0   | D     | COG0445                 | NAD/FAD-utilizing enzyme apparently involved in cell division                                                                                                                                                    |
| TS28Rum08889 CDS CDS | 0.5   | 36.0 | 0.0   | D     | COG1196                 | Chromosome segregation ATPases                                                                                                                                                                                   |
| TS28Bif3406 CDS CDS  | 0.6   | 42.6 | 0.0   | D     | COG1196                 | Chromosome segregation ATPases                                                                                                                                                                                   |
| TS28Clo1533 CDS CDS  | 1.0   | 78.0 | 0.0   | D     | COG3599                 | Cell division initiation protein                                                                                                                                                                                 |
| TS28Eub7153 CDS CDS  | 0.5   | 62.5 | 0.0   | D     | COG0206                 | Cell division GTPase                                                                                                                                                                                             |
| Cnex1324 CDS CDS     | 16.5  | 1.0  | 54.6  | D U W | COG5295 COG1674         | Autotransporter adhesin DNA segregation ATPase FtsK/SpoIIIE and related proteins                                                                                                                                 |
| Rgna2457 CDS CDS     | 0.3   | 47.7 | 0.0   | D V   | COG1136 COG2884 COG2177 | ABC-type antimicrobial peptide transport system, ATPase component Predicted ATPase involved in cell division Cell division protein                                                                               |
| Rumhyd1512 CDS CDS   | 1.0   | 65.0 | 0.1   | D V Q | COG1136 COG4181 COG2884 | ABC-type antimicrobial peptide transport system, ATPase component Predicted ABC-type transport system involved in lysophospholipase L1 biosynthesis, ATPase component Predicted ATPase involved in cell division |
| Rlac0718 CDS CDS     | 0.3   | 25.2 | 0.0   | D V Q | COG1136 COG4181 COG2884 | ABC-type antimicrobial peptide transport system, ATPase component Predicted ABC-type transport system involved in lysophospholipase L1 biosynthesis, ATPase component Predicted ATPase involved in cell division |
| CspL21888 CDS CDS    | 0.3   | 25.2 | 0.0   | D V Q | COG1136 COG4181 COG2884 | ABC-type antimicrobial peptide transport system, ATPase component Predicted ABC-type transport system involved in lysophospholipase L1 biosynthesis, ATPase component Predicted ATPase involved in cell division |
| Pmer0936 CDS CDS     | 20.5  | 0.5  | 135.6 | E     | COG0006                 | Xaa-Pro aminopeptidase                                                                                                                                                                                           |
| Bste0970 CDS CDS     | 30.5  | 1.0  | 100.9 | E     | COG0436                 | Aspartate/tyrosine/aromatic aminotransferase                                                                                                                                                                     |
| TS28Clo07223 CDS CDS | 148.0 | 6.0  | 81.6  | E     | COG0040                 | ATP phosphoribosyltransferase                                                                                                                                                                                    |
| Csci1219 CDS CDS     | 22.0  | 1.0  | 72.8  | E     | COG1115                 | Na <sup>+</sup> /alanine symporter                                                                                                                                                                               |
| ShigspD90687 CDS CDS | 11.0  | 0.5  | 72.8  | E     | COG0747                 | ABC-type dipeptide transport system, periplasmic component                                                                                                                                                       |
| Msmi741263 CDS CDS   | 5.7   | 0.3  | 56.2  | E     | COG0107 COG0106 COG1411 | Imidazoleglycerol-phosphate synthase Phosphoribosylformimino-5-aminoimidazole carboxamide ribonucleotide (ProFAR) isomerase Uncharacterized protein related to proFAR isomerase (HisA)                           |
| Rbro0692 CDS CDS     | 8.0   | 0.5  | 52.9  | E     | COG0082                 | Chorismate synthase                                                                                                                                                                                              |
| Msmi741505 CDS CDS   | 3.9   | 0.3  | 51.4  | E     | COG2061                 | ACT-domain-containing protein, predicted allosteric regulator of homoserine dehydrogenase                                                                                                                        |
| Csym4390 CDS CDS     | 14.5  | 1.0  | 48.0  | E     | COG0334                 | Glutamate dehydrogenase/leucine dehydrogenase                                                                                                                                                                    |
| TS29Fae02228 CDS CDS | 4.7   | 0.3  | 46.3  | E     | COG1115                 | Na <sup>+</sup> /alanine symporter                                                                                                                                                                               |
| Rlac2184 CDS CDS     | 14.0  | 1.0  | 46.3  | E     | COG0560                 | Phosphoserine phosphatase                                                                                                                                                                                        |
| ShigspD90704 CDS CDS | 7.0   | 0.5  | 46.3  | E     | COG0339                 | Zn-dependent oligopeptidases                                                                                                                                                                                     |
| TS29Fae06344 CDS CDS | 6.5   | 0.5  | 43.0  | E     | COG4992                 | Ornithine/acetylornithine aminotransferase                                                                                                                                                                       |
| Msmi740580 CDS CDS   | 6.5   | 0.5  | 43.0  | E     | COG0241 COG0131         | Histidinol phosphatase and related phosphatases Imidazoleglycerol-phosphate dehydratase                                                                                                                          |
| Msmi750207 CDS CDS   | 2.9   | 0.3  | 38.1  | E     | COG2061                 | ACT-domain-containing protein, predicted allosteric regulator of homoserine dehydrogenase                                                                                                                        |
| ShigspD91594 CDS CDS | 11.5  | 1.0  | 38.0  | E     | COG0070                 | Glutamate synthase domain 3                                                                                                                                                                                      |
| ShigspD91973 CDS CDS | 5.5   | 0.5  | 36.4  | E     | COG2166 COG0520         | SufE protein probably involved in Fe-S center assembly Selenocysteine lyase                                                                                                                                      |
| Msmi751157 CDS CDS   | 2.7   | 0.3  | 35.7  | E     | COG0040                 | ATP phosphoribosyltransferase                                                                                                                                                                                    |
| TS29Rum15162 CDS CDS | 5.0   | 0.5  | 33.1  | E     | COG0703                 | Shikimate kinase                                                                                                                                                                                                 |
| CspM6212980 CDS CDS  | 55.8  | 6.0  | 30.8  | E     | COG0334                 | Glutamate dehydrogenase/leucine dehydrogenase                                                                                                                                                                    |
| Even0062 CDS CDS     | 18.0  | 2.0  | 29.8  | E     | COG0141 COG0079         | Histidinol dehydrogenase Histidinol-phosphate/aromatic aminotransferase and cobryric acid decarboxylase                                                                                                          |
| TS28Par1626 CDS CDS  | 8.3   | 1.0  | 27.6  | E     | COG0031                 | Cysteine synthase                                                                                                                                                                                                |
| Msmi741112 CDS CDS   | 4.8   | 0.6  | 27.2  | E     | COG0082                 | Chorismate synthase                                                                                                                                                                                              |
| TS29Bac10313 CDS CDS | 4.0   | 0.5  | 26.5  | E     | COG2195                 | Di- and tripeptidases                                                                                                                                                                                            |
| Csym2934 CDS CDS     | 8.0   | 1.0  | 26.5  | E     | COG2049 COG1984         | Allophanate hydrolase subunit 1 Allophanate hydrolase subunit 2                                                                                                                                                  |
| Bxv11135 CDS CDS     | 7.0   | 1.0  | 23.1  | E     | COG1770 COG1505         | Protease II Serine proteases of the peptidase family S9A                                                                                                                                                         |
| Hfi12320 CDS CDS     | 7.0   | 1.0  | 23.1  | E     | COG1506                 | Dipeptidyl aminopeptidases/acvlaminoacyl-peptidases                                                                                                                                                              |
| ShigspD90224 CDS CDS | 7.0   | 1.0  | 23.1  | E     | COG1171                 | Threonine dehydratase                                                                                                                                                                                            |
| TS29Fae08373 CDS CDS | 3.5   | 0.5  | 23.1  | E     | COG1164                 | Oligoendopeptidase F                                                                                                                                                                                             |
| Acol3089 CDS CDS     | 7.0   | 1.0  | 23.1  | E     | COG1104                 | Cysteine sulfinate desulfurase/cysteine desulfurase and related enzymes                                                                                                                                          |
| Chy13376 CDS CDS     | 7.0   | 1.0  | 23.1  | E     | COG1063 COG1064         | Threonine dehydrogenase and related Zn-dependent dehydrogenases Zn-dependent alcohol dehydrogenases                                                                                                              |
| Msmi750208 CDS CDS   | 7.0   | 1.0  | 23.1  | E     | COG0460                 | Homoserine dehydrogenase                                                                                                                                                                                         |
| Rgna0316 CDS CDS     | 7.0   | 1.0  | 23.1  | E     | COG0119                 | Isopropylmalate/homocitrate/citramalate synthases                                                                                                                                                                |
| TS29Fae03807 CDS CDS | 3.3   | 0.5  | 22.0  | E     | COG0107                 | Imidazoleglycerol-phosphate synthase                                                                                                                                                                             |
| TS29Bac01406 CDS CDS | 6.5   | 1.0  | 21.5  | E     | COG1506                 | Dipeptidyl aminopeptidases/acvlaminoacyl-peptidases                                                                                                                                                              |
| Buni3612 CDS CDS     | 6.5   | 1.0  | 21.5  | E     | COG1063                 | Threonine dehydrogenase and related Zn-dependent dehydrogenases                                                                                                                                                  |
| ShigspD90675 CDS CDS | 6.5   | 1.0  | 21.5  | E     | COG0683                 | ABC-type branched-chain amino acid transport systems, periplasmic component                                                                                                                                      |
| Dlon0626 CDS CDS     | 25.5  | 4.0  | 21.1  | E     | COG0686                 | Alanine dehydrogenase                                                                                                                                                                                            |
| TS29Bac11385 CDS CDS | 5.0   | 0.8  | 19.8  | E     | COG1509                 | Lysine 2,3-aminomutase                                                                                                                                                                                           |
| TS29Bac00610 CDS CDS | 3.0   | 0.5  | 19.8  | E     | COG2502                 | Asparagine synthase A                                                                                                                                                                                            |
| Aput2348 CDS CDS     | 6.0   | 1.0  | 19.8  | E     | COG1410                 | Methionine synthase I, cobalamin-binding domain                                                                                                                                                                  |

|                          |      |      |      |   |                 |                                                                                                                                                 |
|--------------------------|------|------|------|---|-----------------|-------------------------------------------------------------------------------------------------------------------------------------------------|
| TS29Clo1411 CDS CDS      | 12.0 | 2.0  | 19.8 | E | COG0747 COG4166 | ABC-type dipeptide transport system, periplasmic component ABC-type oligopeptide transport system, periplasmic component                        |
| Ccom0724 CDS CDS         | 6.0  | 1.0  | 19.8 | E | COG0560         | Phosphoserine phosphatase                                                                                                                       |
| Ccom0570 CDS CDS         | 3.0  | 0.5  | 19.8 | E | COG0119         | Isopropylmalate/homocitrate/citramalate synthases                                                                                               |
| Dfor2261 CDS CDS         | 12.0 | 2.0  | 19.8 | E | COG0031         | Cysteine synthase                                                                                                                               |
| TS28Bac3160 CDS CDS      | 3.0  | 0.5  | 19.8 | E | COG0006         | Xaa-Pro aminopeptidase                                                                                                                          |
| TS29Bac11144 CDS CDS     | 5.9  | 1.0  | 19.5 | E | COG0334         | Glutamate dehydrogenase/leucine dehydrogenase                                                                                                   |
| TS28Clo08986 CDS CDS     | 22.0 | 4.0  | 18.2 | E | COG2309         | Leucyl aminopeptidase (aminopeptidase T)                                                                                                        |
| BactD12877 CDS CDS       | 11.0 | 2.0  | 18.2 | E | COG1063         | Threonine dehydrogenase and related Zn-dependent dehydrogenases                                                                                 |
| Bdor0185 CDS CDS         | 52.7 | 10.0 | 17.4 | E | COG0334         | Glutamate dehydrogenase/leucine dehydrogenase                                                                                                   |
| Msmi751306 CDS CDS       | 5.7  | 1.1  | 16.9 | E | COG0174         | Glutamine synthetase                                                                                                                            |
| ShigspD91251 CDS CDS     | 2.5  | 0.5  | 16.5 | E | COG1982         | Arginine/lysine/ornithine decarboxylases                                                                                                        |
| Dlon1964 CDS CDS         | 5.0  | 1.0  | 16.5 | E | COG1775         | Benzoyl-CoA reductase/2-hydroxyglutaryl-CoA dehydratase subunit, BcrC/BadD/HgdB                                                                 |
| Dfor0629 CDS CDS         | 25.0 | 5.0  | 16.5 | E | COG1115         | Na <sup>+</sup> /alanine symporter                                                                                                              |
| TS29Rum13140 CDS CDS     | 2.5  | 0.5  | 16.5 | E | COG1104         | Cysteine sulfinate desulfurase/cysteine desulfurase and related enzymes                                                                         |
| Ehal0230 CDS CDS         | 2.5  | 0.5  | 16.5 | E | COG1104         | Cysteine sulfinate desulfurase/cysteine desulfurase and related enzymes                                                                         |
| Aput0521 CDS CDS         | 5.0  | 1.0  | 16.5 | E | COG1003         | Glycine cleavage system protein P (pyridoxal-binding), C-terminal domain                                                                        |
| Acol0348 CDS CDS         | 5.0  | 1.0  | 16.5 | E | COG0624         | Acetylornithine deacetylase/Succinyl-diaminopimelate desuccinylase and related deacylases                                                       |
| TS29Rum03801 CDS CDS     | 5.0  | 1.0  | 16.5 | E | COG0436         | Aspartate/tyrosine/aromatic aminotransferase                                                                                                    |
| FpraM2122241 CDS CDS     | 2.5  | 0.5  | 16.5 | E | COG0112         | Glycine/serine hydroxymethyltransferase                                                                                                         |
| Casp5373 CDS CDS         | 5.0  | 1.0  | 16.5 | E | COG0110 COG1605 | Acetyltransferase (isoleucine patch superfamily) Chorismate mutase                                                                              |
| TS28Bac8210 CDS CDS      | 2.5  | 0.5  | 16.5 | E | COG0066         | 3-isopropylmalate dehydratase small subunit                                                                                                     |
| TS28Rum02192 CDS CDS     | 11.7 | 2.3  | 16.5 | E | COG0031         | Cysteine synthase                                                                                                                               |
| Msmi751231 CDS CDS       | 6.7  | 1.3  | 16.5 | E | COG0112         | Glycine/serine hydroxymethyltransferase                                                                                                         |
| Msmi740412 CDS CDS       | 10.8 | 2.2  | 16.4 | E | COG0019         | Diaminopimelate decarboxylase                                                                                                                   |
| Bdor0887 CDS CDS         | 47.0 | 9.8  | 15.8 | E | COG0527         | Aspartokinases                                                                                                                                  |
| Bdor0438 CDS CDS         | 4.7  | 1.0  | 15.4 | E | COG1280         | Putative threonine efflux protein                                                                                                               |
| RinL13590 CDS CDS        | 14.0 | 3.0  | 15.4 | E | COG1045 COG2151 | Serine acetyltransferase Predicted metal-sulfur cluster biosynthetic enzyme                                                                     |
| Hfil2341 CDS CDS         | 4.7  | 1.0  | 15.4 | E | COG0747         | ABC-type dipeptide transport system, periplasmic component                                                                                      |
| TS29Rum12053 CDS CDS     | 9.0  | 2.0  | 14.9 | E | COG2151 COG1045 | Predicted metal-sulfur cluster biosynthetic enzyme Serine acetyltransferase                                                                     |
| ShigspD91918 CDS CDS     | 4.5  | 1.0  | 14.9 | E | COG1171         | Threonine dehydratase                                                                                                                           |
| TS29Rum17372 CDS CDS     | 9.0  | 2.0  | 14.9 | E | COG0685         | 5,10-methylenetetrahydrofolate reductase                                                                                                        |
| TS28Par0149 CDS CDS      | 4.5  | 1.0  | 14.9 | E | COG0509         | Glycine cleavage system H protein (lipoate-binding)                                                                                             |
| Pmer0208 CDS CDS         | 4.5  | 1.0  | 14.9 | E | COG0509         | Glycine cleavage system H protein (lipoate-binding)                                                                                             |
| TS28Fae10494 CDS CDS     | 9.0  | 2.0  | 14.9 | E | COG0019 COG0527 | Diaminopimelate decarboxylase Aspartokinases                                                                                                    |
| TS29Fae06291 CDS CDS     | 6.5  | 1.5  | 14.3 | E | COG0169 COG0703 | Shikimate 5-dehydrogenase Shikimate kinase                                                                                                      |
| TS29Bac05416 CDS CDS     | 8.5  | 2.0  | 14.1 | E | COG1350 COG0133 | Predicted alternative tryptophan synthase beta-subunit (paralog of TrpB) Tryptophan synthase beta chain                                         |
| TS29Bif2456 CDS CDS      | 3.5  | 0.8  | 13.9 | E | COG0747 COG4166 | ABC-type dipeptide transport system, periplasmic component ABC-type oligopeptide transport system, periplasmic component                        |
| BactD14232 CDS CDS       | 9.8  | 2.3  | 13.8 | E | COG0673 COG1063 | Predicted dehydrogenases and related proteins Threonine dehydrogenase and related Zn-dependent dehydrogenases                                   |
| Bdor2206 CDS CDS         | 25.0 | 6.0  | 13.8 | E | COG0174         | Glutamine synthetase                                                                                                                            |
| Pmer1998 CDS CDS         | 12.3 | 3.0  | 13.6 | E | COG0031         | Cysteine synthase                                                                                                                               |
| TS29RumUnc0053 CDS CDS   | 4.0  | 1.0  | 13.2 | E | COG4992         | Ornithine/acetylornithine aminotransferase                                                                                                      |
| Ccom0576 CDS CDS         | 8.0  | 2.0  | 13.2 | E | COG4992         | Ornithine/acetylornithine aminotransferase                                                                                                      |
| Cbol4568 CDS CDS         | 4.0  | 1.0  | 13.2 | E | COG4608 COG1123 | ABC-type oligopeptide transport system, ATPase component ATPase components of various ABC-type transport systems, contain duplicated ATPase     |
| RinL13046 CDS CDS        | 4.0  | 1.0  | 13.2 | E | COG2957         | Pentidylarginine deiminase and related enzymes                                                                                                  |
| Acol3304 CDS CDS         | 8.0  | 2.0  | 13.2 | E | COG2873         | O-acetylhomoserine sulfhydrylase                                                                                                                |
| TS29Fae05550 CDS CDS     | 2.0  | 0.5  | 13.2 | E | COG2502         | Asparagine synthetase A                                                                                                                         |
| Cram0425 CDS CDS         | 4.0  | 1.0  | 13.2 | E | COG1748         | Saccharopine dehydrogenase and related proteins                                                                                                 |
| Bste1007 CDS CDS         | 8.0  | 2.0  | 13.2 | E | COG1506         | Dipeptidyl aminopeptidases/acylaminoacyl-peptidases                                                                                             |
| ShigspD90484 CDS CDS     | 2.0  | 0.5  | 13.2 | E | COG1446         | Asparaginase                                                                                                                                    |
| b0828 CDS L-asparaginase | 2.0  | 0.5  | 13.2 | E | COG1446         | Asparaginase                                                                                                                                    |
| Csvm2155 CDS CDS         | 4.0  | 1.0  | 13.2 | E | COG1114         | Branched-chain amino acid permeases                                                                                                             |
| Bdor3564 CDS CDS         | 24.0 | 6.0  | 13.2 | E | COG0624         | Acetylornithine deacetylase/Succinyl-diaminopimelate desuccinylase and related deacylases                                                       |
| Even1832 CDS CDS         | 8.0  | 2.0  | 13.2 | E | COG0560         | Phosphoserine phosphatase                                                                                                                       |
| Rbro1276 CDS CDS         | 4.0  | 1.0  | 13.2 | E | COG0498         | Threonine synthase                                                                                                                              |
| Dlon0672 CDS CDS         | 4.0  | 1.0  | 13.2 | E | COG0436 COG1168 | Aspartate/tyrosine/aromatic aminotransferase Bifunctional PLP-dependent enzyme with beta-cystathionase and maltose regulon repressor activities |
| TS29Rum18876 CDS CDS     | 4.0  | 1.0  | 13.2 | E | COG0410 COG0411 | ABC-type branched-chain amino acid transport systems, ATPase component ABC-type branched-chain amino acid transport systems, ATPase component   |
| TS28Rum01620 CDS CDS     | 4.0  | 1.0  | 13.2 | E | COG0345         | Pyrraline-5-carboxylate reductase                                                                                                               |
| Bste2240 CDS CDS         | 4.0  | 1.0  | 13.2 | E | COG0078         | Ornithine carbamoyltransferase                                                                                                                  |
| Acac0231 CDS CDS         | 4.0  | 1.0  | 13.2 | E | COG0078         | Ornithine carbamoyltransferase                                                                                                                  |
| Aput0169 CDS CDS         | 4.0  | 1.0  | 13.2 | E | COG0019 COG1166 | Diaminopimelate decarboxylase Arginine decarboxylase (spermidine biosynthesis)                                                                  |
| ShigspD90048 CDS CDS     | 2.0  | 0.5  | 13.2 | E | COG0002         | Acetylglutamate semialdehyde dehydrogenase                                                                                                      |
| Bcap3085 CDS CDS         | 30.5 | 8.0  | 12.6 | E | COG4992         | Ornithine/acetylornithine aminotransferase                                                                                                      |
| Msmi740560 CDS CDS       | 1.9  | 0.5  | 12.2 | E | COG0440         | Acetolactate synthase, small (regulatory) subunit                                                                                               |
| Msmi750974 CDS CDS       | 4.9  | 1.3  | 12.2 | E | COG0137         | Argininosuccinate synthase                                                                                                                      |
| Msmi741518 CDS CDS       | 4.5  | 1.3  | 11.9 | E | COG2021         | Homoserine acetyltransferase                                                                                                                    |
| ShigspD92349 CDS CDS     | 3.5  | 1.0  | 11.6 | E | COG3075         | Anaerobic glycerol-3-phosphate dehydrogenase                                                                                                    |
| Csym2030 CDS CDS         | 7.0  | 2.0  | 11.6 | E | COG1775         | Benzoyl-CoA reductase/2-hydroxyglutaryl-CoA dehydratase subunit, BcrC/BadD/HgdB                                                                 |
| Pmer2705 CDS CDS         | 7.0  | 2.0  | 11.6 | E | COG1280         | Putative threonine efflux protein                                                                                                               |

|                      |      |       |      |   |                         |                                                                                                                                                                |
|----------------------|------|-------|------|---|-------------------------|----------------------------------------------------------------------------------------------------------------------------------------------------------------|
| FpraM2120523 CDS CDS | 4.7  | 1.3   | 11.6 | E | COG1115                 | Na <sup>+</sup> /alanine symporter                                                                                                                             |
| Cho2811 CDS CDS      | 7.0  | 2.0   | 11.6 | E | COG0078                 | Ornithine carbamoyltransferase                                                                                                                                 |
| TS28Bac6391 CDS CDS  | 50.7 | 14.5  | 11.6 | E | COG0334                 | Glutamate dehydrogenase/leucine dehydrogenase                                                                                                                  |
| Pmer2888 CDS CDS     | 11.0 | 3.2   | 11.5 | E | COG0334                 | Glutamate dehydrogenase/leucine dehydrogenase                                                                                                                  |
| TS28Col1292 CDS CDS  | 52.0 | 15.0  | 11.5 | E | COG0548 COG1364         | Acetylglutamate kinase N-acetylglutamate synthase (N-acetylornithine aminotransferase)                                                                         |
| Bdor1187 CDS CDS     | 20.5 | 6.0   | 11.3 | E | COG0404                 | Glycine cleavage system T protein (aminomethyltransferase)                                                                                                     |
| TS29Met0793 CDS CDS  | 4.8  | 1.4   | 11.2 | E | COG0082                 | Chorismate synthase                                                                                                                                            |
| Msmi751359 CDS CDS   | 4.8  | 1.4   | 11.2 | E | COG0075                 | Serine-pyruvate aminotransferase/archaeal aspartate aminotransferase                                                                                           |
| Bdor1186 CDS CDS     | 23.5 | 7.0   | 11.1 | E | COG2195                 | Di- and tripeptidases                                                                                                                                          |
| TS29Fae02910 CDS CDS | 3.3  | 1.0   | 11.0 | E | COG1362                 | Aspartyl aminopeptidase                                                                                                                                        |
| Bpse1580 CDS CDS     | 3.3  | 1.0   | 11.0 | E | COG0110 COG1605         | Acetyltransferase (isoleucine patch superfamily) Chorismate mutase                                                                                             |
| Bste2827 CDS CDS     | 16.0 | 5.0   | 10.6 | E | COG0337 COG0703         | 3-dehydroquinate synthetase/Shikimate kinase                                                                                                                   |
| Rtor1749 CDS CDS     | 10.7 | 3.3   | 10.6 | E | COG0031                 | Cysteine synthase                                                                                                                                              |
| TS28Rum14136 CDS CDS | 44.0 | 14.0  | 10.4 | E | COG0747                 | ABC-type dipeptide transport system, periplasmic component                                                                                                     |
| Bdor3565 CDS CDS     | 37.7 | 12.0  | 10.4 | E | COG0082                 | Chorismate synthase                                                                                                                                            |
| Rbro0803 CDS CDS     | 4.2  | 1.3   | 10.3 | E | COG3869                 | Arginine kinase                                                                                                                                                |
| FpraM2120451 CDS CDS | 25.0 | 8.0   | 10.3 | E | COG2856                 | Predicted Zn pentiase                                                                                                                                          |
| Bova0498 CDS CDS     | 12.5 | 4.0   | 10.3 | E | COG0006                 | Xaa-Pro aminopeptidase                                                                                                                                         |
| BactD20947 CDS CDS   | 3.1  | 1.0   | 10.3 | E | COG0334                 | Glutamate dehydrogenase/leucine dehydrogenase                                                                                                                  |
| Msmi751520 CDS CDS   | 8.8  | 2.8   | 10.2 | E | COG1410 COG5012         | Methionine synthase I, cobalamin-binding domain Predicted cobalamin binding protein                                                                            |
| Msmi740959 CDS CDS   | 10.0 | 3.3   | 10.2 | E | COG0527                 | Aspartokinases                                                                                                                                                 |
| Msmi750720 CDS CDS   | 10.0 | 3.3   | 10.2 | E | COG0527                 | Aspartokinases                                                                                                                                                 |
| TS28Fae16493 CDS CDS | 2.0  | 66.8  | 0.1  | E | COG1123 COG4608         | ATPase components of various ABC-type transport systems, contain duplicated ATPase ABC-type oligopeptide transport system, ATPase component                    |
| TS28Eub4040 CDS CDS  | 4.0  | 134.5 | 0.1  | E | COG0136 COG0165 COG1246 | Aspartate-semialdehyde dehydrogenase Argininosuccinate lyase N-acetylglutamate synthase and related acetyltransferases                                         |
| TS28Fae02068 CDS CDS | 0.5  | 17.0  | 0.1  | E | COG1176                 | ABC-type spermidine/putrescine transport system, permease component I                                                                                          |
| TS28Bif3955 CDS CDS  | 2.0  | 68.0  | 0.1  | E | COG0747 COG4166         | ABC-type dipeptide transport system, periplasmic component ABC-type oligopeptide transport system, periplasmic component                                       |
| TS28Rum12316 CDS CDS | 1.0  | 34.0  | 0.1  | E | COG0334                 | Glutamate dehydrogenase/leucine dehydrogenase                                                                                                                  |
| TS28Eub4646 CDS CDS  | 1.0  | 34.0  | 0.1  | E | COG0334                 | Glutamate dehydrogenase/leucine dehydrogenase                                                                                                                  |
| TS28Fae00621 CDS CDS | 0.5  | 17.5  | 0.1  | E | COG0786                 | Na <sup>+</sup> /glutamate symporter                                                                                                                           |
| TS28Clo00908 CDS CDS | 4.0  | 144.0 | 0.1  | E | COG2309                 | Leucyl aminopeptidase (aminopeptidase T)                                                                                                                       |
| TS28Rum10436 CDS CDS | 0.5  | 18.0  | 0.1  | E | COG1364                 | N-acetylglutamate synthase (N-acetylornithine aminotransferase)                                                                                                |
| TS28Rum12473 CDS CDS | 0.5  | 18.0  | 0.1  | E | COG0493                 | NADPH-dependent glutamate synthase beta chain and related oxidoreductases                                                                                      |
| TS28Fae19782 CDS CDS | 1.0  | 36.0  | 0.1  | E | COG0493                 | NADPH-dependent glutamate synthase beta chain and related oxidoreductases                                                                                      |
| TS28Eub0362 CDS CDS  | 0.5  | 18.0  | 0.1  | E | COG0078                 | Ornithine carbamoyltransferase                                                                                                                                 |
| TS28Fae18506 CDS CDS | 0.5  | 18.0  | 0.1  | E | COG0031                 | Cysteine synthase                                                                                                                                              |
| TS28Bif2402 CDS CDS  | 1.3  | 48.2  | 0.1  | E | COG0620                 | Methionine synthase II (cobalamin-independent)                                                                                                                 |
| TS28Eub6318 CDS CDS  | 1.5  | 55.0  | 0.1  | E | COG0070                 | Glutamate synthase domain 3                                                                                                                                    |
| TS28Rum12491 CDS CDS | 0.3  | 12.3  | 0.1  | E | COG1063                 | Threonine dehydrogenase and related Zn-dependent dehydrogenases                                                                                                |
| TS29Fae01323 CDS CDS | 0.4  | 16.0  | 0.1  | E | COG1123 COG4608         | ATPase components of various ABC-type transport systems, contain duplicated ATPase ABC-type oligopeptide transport system, ATPase component                    |
| TS28Eub7013 CDS CDS  | 4.0  | 150.5 | 0.1  | E | COG3968 COG0174         | Uncharacterized protein related to glutamine synthetase Glutamine synthetase                                                                                   |
| TS28Dor1361 CDS CDS  | 0.5  | 19.0  | 0.1  | E | COG2195                 | Di- and tripeptidases                                                                                                                                          |
| TS28Fae04728 CDS CDS | 1.0  | 38.0  | 0.1  | E | COG1115                 | Na <sup>+</sup> /alanine symporter                                                                                                                             |
| TS28Eub5168 CDS CDS  | 1.0  | 39.0  | 0.1  | E | COG0337 COG0703         | 3-dehydroquinate synthetase/Shikimate kinase                                                                                                                   |
| TS28Fae10723 CDS CDS | 0.5  | 19.5  | 0.1  | E | COG0002                 | Acetylglutamate semialdehyde dehydrogenase                                                                                                                     |
| TS28Met1793 CDS CDS  | 0.5  | 19.7  | 0.1  | E | COG0165                 | Argininosuccinate lyase                                                                                                                                        |
| TS28Eub5088 CDS CDS  | 1.5  | 60.5  | 0.1  | E | COG0112                 | Glycine/serine hydroxymethyltransferase                                                                                                                        |
| TS29Bif3947 CDS CDS  | 0.3  | 10.2  | 0.1  | E | COG0436                 | Aspartate/tyrosine/aromatic aminotransferase                                                                                                                   |
| TS28Fae10127 CDS CDS | 0.8  | 30.5  | 0.1  | E | COG0040                 | ATP phosphoribosyltransferase                                                                                                                                  |
| TS28Fae20332 CDS CDS | 2.0  | 81.5  | 0.1  | E | COG1982                 | Arginine/lysine/ornithine decarboxylases                                                                                                                       |
| TS28Met1421 CDS CDS  | 0.3  | 10.3  | 0.1  | E | COG0118                 | Glutamine amidotransferase                                                                                                                                     |
| TS28Met0011 CDS CDS  | 0.8  | 31.0  | 0.1  | E | COG0747                 | ABC-type dipeptide transport system, periplasmic component                                                                                                     |
| TS28Fae00332 CDS CDS | 0.5  | 22.0  | 0.1  | E | COG0002                 | Acetylglutamate semialdehyde dehydrogenase                                                                                                                     |
| TS28Eub8330 CDS CDS  | 2.5  | 111.5 | 0.1  | E | COG1115                 | Na <sup>+</sup> /alanine symporter                                                                                                                             |
| TS28Eub7177 CDS CDS  | 6.0  | 268.5 | 0.1  | E | COG0070                 | Glutamate synthase domain 3                                                                                                                                    |
| TS28Bac7238 CDS CDS  | 0.3  | 15.0  | 0.1  | E | COG0436                 | Aspartate/tyrosine/aromatic aminotransferase                                                                                                                   |
| TS28Eub7543 CDS CDS  | 1.5  | 69.5  | 0.1  | E | COG0436                 | Aspartate/tyrosine/aromatic aminotransferase                                                                                                                   |
| TS29Rum00378 CDS CDS | 1.0  | 47.5  | 0.1  | E | COG2957                 | Peptidylarginine deiminase and related enzymes                                                                                                                 |
| TS28Eub4474 CDS CDS  | 0.6  | 29.0  | 0.1  | E | COG3340                 | Peptidase E                                                                                                                                                    |
| TS28Eub8531 CDS CDS  | 1.0  | 48.5  | 0.1  | E | COG0107                 | Imidazoleglycerol-phosphate synthase                                                                                                                           |
| TS28Fae16580 CDS CDS | 2.0  | 102.0 | 0.1  | E | COG2317                 | Zn-dependent carboxypeptidase                                                                                                                                  |
| TS28Fae16508 CDS CDS | 1.0  | 51.0  | 0.1  | E | COG0031                 | Cysteine synthase                                                                                                                                              |
| TS28Clo01140 CDS CDS | 2.0  | 104.0 | 0.1  | E | COG2755                 | Lysophospholipase L1 and related esterases                                                                                                                     |
| TS29Rum00069 CDS CDS | 1.0  | 52.0  | 0.1  | E | COG1115                 | Na <sup>+</sup> /alanine symporter                                                                                                                             |
| TS28Eub7471 CDS CDS  | 1.0  | 52.5  | 0.1  | E | COG0141                 | Histidinol dehydrogenase                                                                                                                                       |
| TS28Clo01167 CDS CDS | 3.0  | 159.0 | 0.1  | E | COG0520 COG2166         | Selenocysteine lyase SufE protein probably involved in Fe-S center assembly                                                                                    |
| TS28Fae12510 CDS CDS | 1.0  | 54.3  | 0.1  | E | COG0337 COG0703         | 3-dehydroquinate synthetase/Shikimate kinase                                                                                                                   |
| TS28Fae00309 CDS CDS | 0.5  | 28.5  | 0.1  | E | COG2317                 | Zn-dependent carboxypeptidase                                                                                                                                  |
| TS28Rum12290 CDS CDS | 0.5  | 28.5  | 0.1  | E | COG1410 COG0685 COG0646 | Methionine synthase I, cobalamin-binding domain 5,10-methylenetetrahydrofolate reductase Methionine synthase I (cobalamin-dependent), methyltransferase domain |
| TS28Fae20285 CDS CDS | 1.0  | 57.0  | 0.1  | E | COG0014                 | Gamma-glutamyl phosphate reductase                                                                                                                             |
| TS28Clo00524 CDS CDS | 3.0  | 172.0 | 0.1  | E | COG3579                 | Aminopeptidase C                                                                                                                                               |
| TS28Eub0092 CDS CDS  | 1.0  | 58.8  | 0.1  | E | COG2873                 | O-acetylhomoserine sulphydrylase                                                                                                                               |

|                      |       |       |         |       |                                                                                 |                                                                                                                                                                                                                                                                                                                                                                                                                                                                                                                                                                                                                                                 |
|----------------------|-------|-------|---------|-------|---------------------------------------------------------------------------------|-------------------------------------------------------------------------------------------------------------------------------------------------------------------------------------------------------------------------------------------------------------------------------------------------------------------------------------------------------------------------------------------------------------------------------------------------------------------------------------------------------------------------------------------------------------------------------------------------------------------------------------------------|
| Buni0698 CDS CDS     | 0.1   | 5.5   | 0.1     | E     | COG0019 COG1166                                                                 | Diaminopimelate decarboxylase Arginine decarboxylase (spermidine biosynthesis)                                                                                                                                                                                                                                                                                                                                                                                                                                                                                                                                                                  |
| TS28Fae12395 CDS CDS | 0.3   | 21.3  | 0.1     | E     | COG3048                                                                         | D-serine dehydratase                                                                                                                                                                                                                                                                                                                                                                                                                                                                                                                                                                                                                            |
| TS28Fae16847 CDS CDS | 1.0   | 66.0  | 0.1     | E     | COG1063                                                                         | Threonine dehydrogenase and related Zn-dependent dehydrogenases                                                                                                                                                                                                                                                                                                                                                                                                                                                                                                                                                                                 |
| TS28Rum08384 CDS CDS | 0.5   | 33.0  | 0.1     | E     | COG0460                                                                         | Homoserine dehydrogenase                                                                                                                                                                                                                                                                                                                                                                                                                                                                                                                                                                                                                        |
| TS28Fae08445 CDS CDS | 1.0   | 67.0  | 0.0     | E     | COG2355                                                                         | Zn-dependent dipeptidase, microsomal dipeptidase homolog                                                                                                                                                                                                                                                                                                                                                                                                                                                                                                                                                                                        |
| Bpse1713 CDS CDS     | 0.5   | 35.5  | 0.0     | E     | COG1506                                                                         | Dipeptidyl aminopeptidases/acylaminoacyl-peptidases                                                                                                                                                                                                                                                                                                                                                                                                                                                                                                                                                                                             |
| TS28Eub8339 CDS CDS  | 0.5   | 35.5  | 0.0     | E     | COG0260                                                                         | Leuvel aminopeptidase                                                                                                                                                                                                                                                                                                                                                                                                                                                                                                                                                                                                                           |
| TS28Clo0974 CDS CDS  | 2.0   | 147.0 | 0.0     | E     | COG1063                                                                         | Threonine dehydrogenase and related Zn-dependent dehydrogenases                                                                                                                                                                                                                                                                                                                                                                                                                                                                                                                                                                                 |
| TS28Met1521 CDS CDS  | 0.3   | 19.3  | 0.0     | E     | COG0119                                                                         | Isopropylmalate/homocitrate/citramalate synthases                                                                                                                                                                                                                                                                                                                                                                                                                                                                                                                                                                                               |
| TS28Fae19459 CDS CDS | 0.5   | 39.0  | 0.0     | E     | COG0040                                                                         | ATP phosphoribosyltransferase                                                                                                                                                                                                                                                                                                                                                                                                                                                                                                                                                                                                                   |
| TS28Fae19783 CDS CDS | 1.0   | 79.0  | 0.0     | E     | COG0070                                                                         | Glutamate synthase domain 3                                                                                                                                                                                                                                                                                                                                                                                                                                                                                                                                                                                                                     |
| TS28Fae08988 CDS CDS | 0.5   | 40.0  | 0.0     | E     | COG0031                                                                         | Cysteine synthase                                                                                                                                                                                                                                                                                                                                                                                                                                                                                                                                                                                                                               |
| TS28Fae22037 CDS CDS | 1.0   | 84.0  | 0.0     | E     | COG1305                                                                         | Transglutaminase-like enzymes, putative cysteine proteases                                                                                                                                                                                                                                                                                                                                                                                                                                                                                                                                                                                      |
| TS28Eub8892 CDS CDS  | 1.5   | 129.0 | 0.0     | E     | COG1410                                                                         | Methionine synthase I, cobalamin-binding domain                                                                                                                                                                                                                                                                                                                                                                                                                                                                                                                                                                                                 |
| TS28Eub6262 CDS CDS  | 0.3   | 22.0  | 0.0     | E     | COG1115                                                                         | Na <sup>+</sup> /alanine symporter                                                                                                                                                                                                                                                                                                                                                                                                                                                                                                                                                                                                              |
| TS28Met1855 CDS CDS  | 0.3   | 22.2  | 0.0     | E     | COG0119                                                                         | Isopropylmalate/homocitrate/citramalate synthases                                                                                                                                                                                                                                                                                                                                                                                                                                                                                                                                                                                               |
| TS28Eub8766 CDS CDS  | 0.7   | 60.0  | 0.0     | E     | COG0137                                                                         | Argininosuccinate synthase                                                                                                                                                                                                                                                                                                                                                                                                                                                                                                                                                                                                                      |
| TS28Fae16126 CDS CDS | 0.3   | 30.5  | 0.0     | E     | COG4177                                                                         | ABC-type branched-chain amino acid transport system, permease component                                                                                                                                                                                                                                                                                                                                                                                                                                                                                                                                                                         |
| TS28Eub3848 CDS CDS  | 2.5   | 233.5 | 0.0     | E     | COG0070                                                                         | Glutamate synthase domain 3                                                                                                                                                                                                                                                                                                                                                                                                                                                                                                                                                                                                                     |
| TS28Eub4118 CDS CDS  | 0.5   | 52.0  | 0.0     | E     | COG0019                                                                         | Diaminopimelate decarboxylase                                                                                                                                                                                                                                                                                                                                                                                                                                                                                                                                                                                                                   |
| TS28Eub8543 CDS CDS  | 0.5   | 52.5  | 0.0     | E     | COG0031                                                                         | Cysteine synthase                                                                                                                                                                                                                                                                                                                                                                                                                                                                                                                                                                                                                               |
| TS28Fae12262 CDS CDS | 0.4   | 46.0  | 0.0     | E     | COG0421                                                                         | Spermidine synthase                                                                                                                                                                                                                                                                                                                                                                                                                                                                                                                                                                                                                             |
| TS28Eub8882 CDS CDS  | 1.0   | 122.8 | 0.0     | E     | COG1305 COG1721                                                                 | Transglutaminase-like enzymes, putative cysteine proteases Uncharacterized conserved protein (some members contain a von Willebrand factor type A (vWA) domain)                                                                                                                                                                                                                                                                                                                                                                                                                                                                                 |
| TS28Bif3581 CDS CDS  | 0.5   | 69.0  | 0.0     | E     | COG1506                                                                         | Dipeptidyl aminopeptidases/acylaminoacyl-peptidases                                                                                                                                                                                                                                                                                                                                                                                                                                                                                                                                                                                             |
| TS28Eub6499 CDS CDS  | 0.5   | 73.5  | 0.0     | E     | COG1115                                                                         | Na <sup>+</sup> /alanine symporter                                                                                                                                                                                                                                                                                                                                                                                                                                                                                                                                                                                                              |
| TS28Fae15789 CDS CDS | 0.2   | 33.0  | 0.0     | E     | COG0119                                                                         | Isopropylmalate/homocitrate/citramalate synthases                                                                                                                                                                                                                                                                                                                                                                                                                                                                                                                                                                                               |
| TS28Fae20498 CDS CDS | 0.3   | 84.5  | 0.0     | E     | COG0624                                                                         | Acetylmethylamine deacetylase/Succinyl-diaminopimelate desuccinylase and related deacetylases                                                                                                                                                                                                                                                                                                                                                                                                                                                                                                                                                   |
| Msmi751273 CDS CDS   | 104.5 | 0.3   | 1,036.7 | E C   | COG1063 COG1064 COG0604                                                         | Threonine dehydrogenase and related Zn-dependent dehydrogenases Zn-dependent alcohol dehydrogenases NADPH:quinone reductase and related Zn-dependent oxidoreductases                                                                                                                                                                                                                                                                                                                                                                                                                                                                            |
| Msmi740404 CDS CDS   | 105.8 | 0.8   | 419.6   | E C   | COG1063 COG1064 COG0604                                                         | Threonine dehydrogenase and related Zn-dependent dehydrogenases Zn-dependent alcohol dehydrogenases NADPH:quinone reductase and related Zn-dependent oxidoreductases                                                                                                                                                                                                                                                                                                                                                                                                                                                                            |
| Cspi1642 CDS CDS     | 206.0 | 3.0   | 227.1   | E C   | COG0065 COG1048                                                                 | 3-isopropylmalate dehydratase large subunit Aconitase A                                                                                                                                                                                                                                                                                                                                                                                                                                                                                                                                                                                         |
| TS29Bac09082 CDS CDS | 8.0   | 0.5   | 52.9    | E C   | COG0065 COG1048                                                                 | 3-isopropylmalate dehydratase large subunit Aconitase A                                                                                                                                                                                                                                                                                                                                                                                                                                                                                                                                                                                         |
| TS28Met0718 CDS CDS  | 179.3 | 16.8  | 35.2    | E C   | COG1064 COG1063 COG0604                                                         | Zn-dependent alcohol dehydrogenases Threonine dehydrogenase and related Zn-dependent dehydrogenases NADPH:quinone reductase and related Zn-dependent oxidoreductases                                                                                                                                                                                                                                                                                                                                                                                                                                                                            |
| TS29Fae08554 CDS CDS | 4.0   | 0.5   | 26.5    | E C   | COG0578 COG0579 COG0665                                                         | Glycerol-3-phosphate dehydrogenase Predicted dehydrogenase Glycine/D-amino acid oxidases (deaminating)                                                                                                                                                                                                                                                                                                                                                                                                                                                                                                                                          |
| Bste2233 CDS CDS     | 10.3  | 1.5   | 22.8    | E C   | COG0665 COG0579 COG0578                                                         | Glycine/D-amino acid oxidases (deaminating) Predicted dehydrogenase Glycerol-3-phosphate dehydrogenase                                                                                                                                                                                                                                                                                                                                                                                                                                                                                                                                          |
| Bste2622 CDS CDS     | 12.5  | 2.0   | 20.7    | E C   | COG0473 COG0538                                                                 | Isocitrate/isopropylmalate dehydrogenase Isocitrate dehydrogenases                                                                                                                                                                                                                                                                                                                                                                                                                                                                                                                                                                              |
| CspSS22014 CDS CDS   | 8.0   | 2.5   | 10.6    | E C   | COG0665 COG0579 COG0578                                                         | Glycine/D-amino acid oxidases (deaminating) Predicted dehydrogenase Glycerol-3-phosphate dehydrogenase                                                                                                                                                                                                                                                                                                                                                                                                                                                                                                                                          |
| Dfor2257 CDS CDS     | 0.3   | 9.0   | 0.1     | E C   | COG0065 COG1048                                                                 | 3-isopropylmalate dehydratase large subunit Aconitase A                                                                                                                                                                                                                                                                                                                                                                                                                                                                                                                                                                                         |
| TS28Fae22487 CDS CDS | 0.5   | 19.5  | 0.1     | E C   | COG0473 COG0538                                                                 | Isocitrate/isopropylmalate dehydrogenase Isocitrate dehydrogenases                                                                                                                                                                                                                                                                                                                                                                                                                                                                                                                                                                              |
| TS28Clo05930 CDS CDS | 0.3   | 15.0  | 0.1     | E C   | COG0065 COG1048                                                                 | 3-isopropylmalate dehydratase large subunit Aconitase A                                                                                                                                                                                                                                                                                                                                                                                                                                                                                                                                                                                         |
| TS28Fae00442 CDS CDS | 0.3   | 22.2  | 0.0     | E C   | COG0493 COG1902 COG1249                                                         | NADPH-dependent glutamate synthase beta chain and related oxidoreductases NADH:flavin oxidoreductases, Old Yellow Enzyme family Pyruvate/2-oxoglutarate dehydrogenase complex, dihydroliipoamide dehydrogenase (E3) component, and related enzymes                                                                                                                                                                                                                                                                                                                                                                                              |
| TS28Eub8736 CDS CDS  | 0.5   | 46.0  | 0.0     | E C   | COG0473                                                                         | Isocitrate/isopropylmalate dehydrogenase                                                                                                                                                                                                                                                                                                                                                                                                                                                                                                                                                                                                        |
| TS28Bac0889 CDS CDS  | 5.5   | 1.0   | 18.2    | E C H | COG0111 COG1052                                                                 | Phosphoglycerate dehydrogenase and related dehydrogenases Lactate dehydrogenase and related dehydrogenases                                                                                                                                                                                                                                                                                                                                                                                                                                                                                                                                      |
| TS28Par1075 CDS CDS  | 15.0  | 3.0   | 16.5    | E C H | COG0111 COG1052                                                                 | Phosphoglycerate dehydrogenase and related dehydrogenases Lactate dehydrogenase and related dehydrogenases                                                                                                                                                                                                                                                                                                                                                                                                                                                                                                                                      |
| TS28Clo03090 CDS CDS | 0.5   | 17.5  | 0.1     | E C H | COG1148 COG4624 COG0493 COG0543 COG1034 COG1142 COG1894 COG1145 COG1143 COG1319 | Heterodisulfide reductase, subunit A and related polyferredoxins Iron only hydrogenase large subunit, C-terminal domain NADPH-dependent glutamate synthase beta chain and related oxidoreductases 2-polyprenylphenol hydroxylase and related flavodoxin oxidoreductases NADH dehydrogenase NADH:ubiquinone oxidoreductase 75 kD subunit (chain G) Fe-S-cluster-containing hydrogenase components 2 NADH:ubiquinone oxidoreductase, NADH-binding (51 kD) subunit Ferredoxin Formate hydrogenlyase subunit 6 NADH:ubiquinone oxidoreductase 23 kD subunit (chain I) Aerobic-type carbon monoxide dehydrogenase, middle subunit CoxM/CutM homologs |

|                      |       |       |         |         |                                                                                 |                                                                                                                                                                                                                                                                                                                                                                                                                                                                                                                                                                                                                                                                      |
|----------------------|-------|-------|---------|---------|---------------------------------------------------------------------------------|----------------------------------------------------------------------------------------------------------------------------------------------------------------------------------------------------------------------------------------------------------------------------------------------------------------------------------------------------------------------------------------------------------------------------------------------------------------------------------------------------------------------------------------------------------------------------------------------------------------------------------------------------------------------|
| TS28Fae14640 CDS CDS | 1.0   | 46.5  | 0.1     | E C H   | COG1148 COG4624 COG0493 COG0543 COG1034 COG1142 COG1894 COG1145 COG1143 COG1144 | Heterodisulfide reductase, subunit A and related polyferredoxins Iron only hydrogenase large subunit, C-terminal domain NADPH-dependent glutamate synthase beta chain and related oxidoreductases 2-polyprenylphenol hydroxylase and related flavodoxin oxidoreductases NADH dehydrogenase NADH:ubiquinone oxidoreductase 75 kD subunit (chain G) Fe-S-cluster-containing hydrogenase components 2 NADH:ubiquinone oxidoreductase, NADH-binding (51 kD) subunit Ferredoxin Formate hydrogenlyase subunit 6 NADH:ubiquinone oxidoreductase 23 kD subunit (chain I) Pyruvate:ferredoxin oxidoreductase and related 2-oxoacid:ferredoxin oxidoreductases, delta subunit |
| TS28Eub8446 CDS CDS  | 1.0   | 50.5  | 0.1     | E C H   | COG4624 COG0493 COG0543 COG1034 COG1894                                         | Iron only hydrogenase large subunit, C-terminal domain NADPH-dependent glutamate synthase beta chain and related oxidoreductases 2-polyprenylphenol hydroxylase and related flavodoxin oxidoreductases NADH dehydrogenase NADH:ubiquinone oxidoreductase 75 kD subunit (chain G) Fe-S-cluster-containing hydrogenase components 2 NADH:ubiquinone oxidoreductase, NADH-binding (51 kD) subunit                                                                                                                                                                                                                                                                       |
| TS28Fae17638 CDS CDS | 1.0   | 60.0  | 0.1     | E C H   | COG0111 COG1052                                                                 | Phosphoglycerate dehydrogenase and related dehydrogenases Lactate dehydrogenase and related dehydrogenases                                                                                                                                                                                                                                                                                                                                                                                                                                                                                                                                                           |
| TS28Eub4390 CDS CDS  | 0.5   | 59.0  | 0.0     | E C H   | COG0493 COG0543 COG1034 COG1142 COG1894                                         | NADPH-dependent glutamate synthase beta chain and related oxidoreductases 2-polyprenylphenol hydroxylase and related flavodoxin oxidoreductases NADH dehydrogenase NADH:ubiquinone oxidoreductase 75 kD subunit (chain G) Fe-S-cluster-containing hydrogenase components 2 NADH:ubiquinone oxidoreductase, NADH-binding (51 kD) subunit                                                                                                                                                                                                                                                                                                                              |
| TS28Fae03904 CDS CDS | 0.3   | 32.0  | 0.0     | E C H   | COG1148 COG4624 COG0493 COG0543 COG1034 COG1142 COG1894 COG1145 COG1143 COG1144 | Heterodisulfide reductase, subunit A and related polyferredoxins Iron only hydrogenase large subunit, C-terminal domain NADPH-dependent glutamate synthase beta chain and related oxidoreductases 2-polyprenylphenol hydroxylase and related flavodoxin oxidoreductases NADH dehydrogenase NADH:ubiquinone oxidoreductase 75 kD subunit (chain G) Fe-S-cluster-containing hydrogenase components 2 NADH:ubiquinone oxidoreductase, NADH-binding (51 kD) subunit Ferredoxin Formate hydrogenlyase subunit 6 NADH:ubiquinone oxidoreductase 23 kD subunit (chain I) Pyruvate:ferredoxin oxidoreductase and related 2-oxoacid:ferredoxin oxidoreductases, delta subunit |
| Msmi750470 CDS CDS   | 6.3   | 0.3   | 83.8    | E F     | COG0462                                                                         | Phosphoribosylpyrophosphate synthetase                                                                                                                                                                                                                                                                                                                                                                                                                                                                                                                                                                                                                               |
| Msmi750095 CDS CDS   | 10.5  | 1.3   | 25.9    | E F     | COG0283 COG0128 COG0287 COG0710                                                 | Cytidylate kinase 5-enolpyruvylshikimate-3-phosphate synthase Prephenate dehydrogenase 3-dehydroquininate dehydratase                                                                                                                                                                                                                                                                                                                                                                                                                                                                                                                                                |
| Cspi0127 CDS CDS     | 18.0  | 3.0   | 19.8    | E F     | COG0458                                                                         | Carbamoylphosphate synthase large subunit (split gene in MJ)                                                                                                                                                                                                                                                                                                                                                                                                                                                                                                                                                                                                         |
| Bpse0543 CDS CDS     | 5.0   | 1.0   | 16.5    | E F     | COG0283 COG0128 COG0287                                                         | Cytidylate kinase 5-enolpyruvylshikimate-3-phosphate synthase Prephenate dehydrogenase                                                                                                                                                                                                                                                                                                                                                                                                                                                                                                                                                                               |
| Bste2836 CDS CDS     | 2.0   | 0.5   | 13.2    | E F     | COG0283 COG0128 COG0287                                                         | Cytidylate kinase 5-enolpyruvylshikimate-3-phosphate synthase Prephenate dehydrogenase                                                                                                                                                                                                                                                                                                                                                                                                                                                                                                                                                                               |
| TS28Rum01448 CDS CDS | 1.8   | 69.5  | 0.1     | E F     | COG0458                                                                         | Carbamoylphosphate synthase large subunit (split gene in MJ)                                                                                                                                                                                                                                                                                                                                                                                                                                                                                                                                                                                                         |
| TS28Eub1148 CDS CDS  | 0.5   | 21.0  | 0.1     | E F     | COG0462                                                                         | Phosphoribosylpyrophosphate synthetase                                                                                                                                                                                                                                                                                                                                                                                                                                                                                                                                                                                                                               |
| TS28Bif4271 CDS CDS  | 1.3   | 59.8  | 0.1     | E F     | COG0458                                                                         | Carbamoylphosphate synthase large subunit (split gene in MJ)                                                                                                                                                                                                                                                                                                                                                                                                                                                                                                                                                                                                         |
| TS28Eub3855 CDS CDS  | 3.7   | 206.0 | 0.1     | E F     | COG0458                                                                         | Carbamoylphosphate synthase large subunit (split gene in MJ)                                                                                                                                                                                                                                                                                                                                                                                                                                                                                                                                                                                                         |
| Clep1399 CDS CDS     | 0.5   | 29.3  | 0.1     | E F     | COG0458                                                                         | Carbamoylphosphate synthase large subunit (split gene in MJ)                                                                                                                                                                                                                                                                                                                                                                                                                                                                                                                                                                                                         |
| TS28Fae16889 CDS CDS | 0.5   | 37.0  | 0.0     | E F     | COG0462                                                                         | Phosphoribosylpyrophosphate synthetase                                                                                                                                                                                                                                                                                                                                                                                                                                                                                                                                                                                                                               |
| TS28Eub1593 CDS CDS  | 0.5   | 54.5  | 0.0     | E F     | COG0458                                                                         | Carbamoylphosphate synthase large subunit (split gene in MJ)                                                                                                                                                                                                                                                                                                                                                                                                                                                                                                                                                                                                         |
| RintL10507 CDS CDS   | 10.0  | 1.0   | 33.1    | E G     | COG0697                                                                         | Permeases of the drug/metabolite transporter (DMT) superfamily                                                                                                                                                                                                                                                                                                                                                                                                                                                                                                                                                                                                       |
| TS28Par1495 CDS CDS  | 10.5  | 1.5   | 23.1    | E G     | COG0697                                                                         | Permeases of the drug/metabolite transporter (DMT) superfamily                                                                                                                                                                                                                                                                                                                                                                                                                                                                                                                                                                                                       |
| TS29Bac11100 CDS CDS | 5.5   | 1.0   | 18.2    | E G     | COG0697                                                                         | Permeases of the drug/metabolite transporter (DMT) superfamily                                                                                                                                                                                                                                                                                                                                                                                                                                                                                                                                                                                                       |
| Bxy14222 CDS CDS     | 5.5   | 1.0   | 18.2    | E G     | COG0697                                                                         | Permeases of the drug/metabolite transporter (DMT) superfamily                                                                                                                                                                                                                                                                                                                                                                                                                                                                                                                                                                                                       |
| TS28Eub2774 CDS CDS  | 5.5   | 1.0   | 18.2    | E G     | COG0129 COG0676                                                                 | Dihydroxyacid dehydratase/phosphogluconate dehydratase Uncharacterized enzymes related to aldose 1-epimerase                                                                                                                                                                                                                                                                                                                                                                                                                                                                                                                                                         |
| TS29Fae04485 CDS CDS | 2.5   | 0.5   | 16.5    | E G     | COG2610                                                                         | H <sup>+</sup> /gluconate symporter and related permeases                                                                                                                                                                                                                                                                                                                                                                                                                                                                                                                                                                                                            |
| TS28Clo04570 CDS CDS | 12.0  | 3.0   | 13.2    | E G     | COG0697                                                                         | Permeases of the drug/metabolite transporter (DMT) superfamily                                                                                                                                                                                                                                                                                                                                                                                                                                                                                                                                                                                                       |
| Csvm3061 CDS CDS     | 8.0   | 2.0   | 13.2    | E G     | COG0129                                                                         | Dihydroxyacid dehydratase/phosphogluconate dehydratase                                                                                                                                                                                                                                                                                                                                                                                                                                                                                                                                                                                                               |
| Even1370 CDS CDS     | 7.0   | 2.0   | 11.6    | E G     | COG0697                                                                         | Permeases of the drug/metabolite transporter (DMT) superfamily                                                                                                                                                                                                                                                                                                                                                                                                                                                                                                                                                                                                       |
| TS28Bac4048 CDS CDS  | 0.5   | 23.5  | 0.1     | E G     | COG2755 COG3401 COG4677                                                         | Lysophospholipase L1 and related esterases Fibronectin type 3 domain-containing protein Pectin methyltransferase                                                                                                                                                                                                                                                                                                                                                                                                                                                                                                                                                     |
| TS28Fae21406 CDS CDS | 0.5   | 35.5  | 0.0     | E G     | COG2610                                                                         | H <sup>+</sup> /gluconate symporter and related permeases                                                                                                                                                                                                                                                                                                                                                                                                                                                                                                                                                                                                            |
| TS28Col0748 CDS CDS  | 0.2   | 19.0  | 0.0     | E G     | COG3842 COG3839                                                                 | ABC-type spermidine/putrescine transport systems, ATPase components ABC-type sugar transport systems, ATPase components                                                                                                                                                                                                                                                                                                                                                                                                                                                                                                                                              |
| TS29Bac00733 CDS CDS | 358.0 | 0.5   | 2,367.8 | E G P   | COG0477                                                                         | Permeases of the major facilitator superfamily                                                                                                                                                                                                                                                                                                                                                                                                                                                                                                                                                                                                                       |
| TS28Rum14282 CDS CDS | 3.0   | 141.5 | 0.1     | E G P   | COG0477                                                                         | Permeases of the major facilitator superfamily                                                                                                                                                                                                                                                                                                                                                                                                                                                                                                                                                                                                                       |
| TS28Rum16342 CDS CDS | 1.0   | 66.0  | 0.1     | E G P   | COG0477                                                                         | Permeases of the major facilitator superfamily                                                                                                                                                                                                                                                                                                                                                                                                                                                                                                                                                                                                                       |
| Msmi741008 CDS CDS   | 15.1  | 1.8   | 27.2    | E G U   | COG2730 COG3291 COG5563 COG3210 COG1305                                         | Endoglucanase FOG: PKD repeat Predicted integral membrane proteins containing uncharacterized repeats Large exoproteins involved in heme utilization or adhesion Transglutaminase-like enzymes, putative cysteine proteases                                                                                                                                                                                                                                                                                                                                                                                                                                          |
| Msmi741564 CDS CDS   | 14.8  | 1.2   | 41.8    | E G U W | COG2730 COG3291 COG5563 COG3210 COG1305 COG5295                                 | Endoglucanase FOG: PKD repeat Predicted integral membrane proteins containing uncharacterized repeats Large exoproteins involved in heme utilization or adhesion Transglutaminase-like enzymes, putative cysteine proteases Autotransporter adhesin                                                                                                                                                                                                                                                                                                                                                                                                                  |

|                      |      |      |      |           |                                                         |                                                                                                                                                                                                                                                                                                                                                                                                |
|----------------------|------|------|------|-----------|---------------------------------------------------------|------------------------------------------------------------------------------------------------------------------------------------------------------------------------------------------------------------------------------------------------------------------------------------------------------------------------------------------------------------------------------------------------|
| Msmi750154 CDS CDS   | 6.9  | 0.7  | 34.3 | E G U W   | COG2730 COG3291 COG5563 COG3210 COG1305 COG5295         | Endoglucanase FOG: PKD repeat Predicted integral membrane proteins containing uncharacterized repeats Large exoproteins involved in heme utilization or adhesion Transglutaminase-like enzymes, putative cysteine proteases Autotransporter adhesin                                                                                                                                            |
| Msmi750673 CDS CDS   | 15.1 | 4.8  | 10.3 | E G U W   | COG2730 COG3291 COG5563 COG3210 COG1305 COG5295         | Endoglucanase FOG: PKD repeat Predicted integral membrane proteins containing uncharacterized repeats Large exoproteins involved in heme utilization or adhesion Transglutaminase-like enzymes, putative cysteine proteases Autotransporter adhesin                                                                                                                                            |
| Msmi751575 CDS CDS   | 12.9 | 1.1  | 39.5 | E H       | COG0111                                                 | Phosphoglycerate dehydrogenase and related dehydrogenases                                                                                                                                                                                                                                                                                                                                      |
| Dfor0946 CDS CDS     | 8.0  | 1.0  | 26.5 | E H       | COG0111 COG1760                                         | Phosphoglycerate dehydrogenase and related dehydrogenases L-serine deaminase                                                                                                                                                                                                                                                                                                                   |
| TS29Fae08234 CDS CDS | 4.0  | 0.5  | 26.5 | E H       | COG0028                                                 | Thiamine pyrophosphate-requiring enzymes [acetolactate synthase, pyruvate dehydrogenase (cytochrome), glyoxylate carboligase, phosphonopyruvate decarboxylase]                                                                                                                                                                                                                                 |
| ShigspD92659 CDS CDS | 3.8  | 0.5  | 25.4 | E H       | COG0512 COG0147                                         | Anthranilate/para-aminobenzoate synthases component II Anthranilate/para-aminobenzoate synthases component I                                                                                                                                                                                                                                                                                   |
| Msmi751383 CDS CDS   | 6.8  | 0.9  | 24.7 | E H       | COG0079 COG1492                                         | Histidinol-phosphate/aromatic aminotransferase and cobyrinic acid decarboxylase Cobyrinic acid synthase                                                                                                                                                                                                                                                                                        |
| Msmi740079 CDS CDS   | 16.8 | 2.4  | 22.9 | E H       | COG0111                                                 | Phosphoglycerate dehydrogenase and related dehydrogenases                                                                                                                                                                                                                                                                                                                                      |
| ShigspD90227 CDS CDS | 6.5  | 1.0  | 21.5 | E H       | COG0028                                                 | Thiamine pyrophosphate-requiring enzymes [acetolactate synthase, pyruvate dehydrogenase (cytochrome), glyoxylate carboligase, phosphonopyruvate decarboxylase]                                                                                                                                                                                                                                 |
| TS29Bac09079 CDS CDS | 2.0  | 0.3  | 19.8 | E H       | COG0059                                                 | Ketol-acid reductoisomerase                                                                                                                                                                                                                                                                                                                                                                    |
| ShigspD91565 CDS CDS | 5.8  | 1.0  | 19.3 | E H       | COG0591 COG4145                                         | Na <sup>+</sup> /proline symporter Na <sup>+</sup> /panthothenate symporter                                                                                                                                                                                                                                                                                                                    |
| Chv10578 CDS CDS     | 5.0  | 1.0  | 16.5 | E H       | COG0059                                                 | Ketol-acid reductoisomerase                                                                                                                                                                                                                                                                                                                                                                    |
| Msmi740299 CDS CDS   | 6.8  | 1.4  | 16.0 | E H       | COG0079 COG1492                                         | Histidinol-phosphate/aromatic aminotransferase and cobyrinic acid decarboxylase Cobyrinic acid synthase                                                                                                                                                                                                                                                                                        |
| TS28Fae15995 CDS CDS | 18.0 | 4.0  | 14.9 | E H       | COG1932                                                 | Phosphoserine aminotransferase                                                                                                                                                                                                                                                                                                                                                                 |
| TS29Bac09019 CDS CDS | 4.4  | 1.0  | 14.6 | E H       | COG1932                                                 | Phosphoserine aminotransferase                                                                                                                                                                                                                                                                                                                                                                 |
| BactD21340 CDS CDS   | 1.4  | 0.3  | 13.9 | E H       | COG0028                                                 | Thiamine pyrophosphate-requiring enzymes [acetolactate synthase, pyruvate dehydrogenase (cytochrome), glyoxylate carboligase, phosphonopyruvate decarboxylase]                                                                                                                                                                                                                                 |
| Aeol2402 CDS CDS     | 4.0  | 1.0  | 13.2 | E H       | COG0111                                                 | Phosphoglycerate dehydrogenase and related dehydrogenases                                                                                                                                                                                                                                                                                                                                      |
| TS28Dor1091 CDS CDS  | 0.5  | 18.0 | 0.1  | E H       | COG0028 COG3962                                         | Thiamine pyrophosphate-requiring enzymes [acetolactate synthase, pyruvate dehydrogenase (cytochrome), glyoxylate carboligase, phosphonopyruvate decarboxylase] Acetolactate synthase                                                                                                                                                                                                           |
| Dlon1512 CDS CDS     | 0.5  | 18.0 | 0.1  | E H       | COG0028 COG3962                                         | Thiamine pyrophosphate-requiring enzymes [acetolactate synthase, pyruvate dehydrogenase (cytochrome), glyoxylate carboligase, phosphonopyruvate decarboxylase] Acetolactate synthase                                                                                                                                                                                                           |
| TS28Eub7935 CDS CDS  | 1.5  | 56.5 | 0.1  | E H       | COG0115                                                 | Branched-chain amino acid aminotransferase/4-amino-4-deoxychorismate lyase                                                                                                                                                                                                                                                                                                                     |
| TS28Eub6197 CDS CDS  | 1.0  | 41.7 | 0.1  | E H       | COG0059                                                 | Ketol-acid reductoisomerase                                                                                                                                                                                                                                                                                                                                                                    |
| TS28Fae00213 CDS CDS | 0.4  | 17.0 | 0.1  | E H       | COG0059                                                 | Ketol-acid reductoisomerase                                                                                                                                                                                                                                                                                                                                                                    |
| TS29Fae10364 CDS CDS | 1.0  | 44.5 | 0.1  | E H       | COG0175                                                 | 3'-phosphoadenosine 5'-phosphosulfate sulfotransferase (PAPS reductase)/FAD synthetase and related enzymes                                                                                                                                                                                                                                                                                     |
| TS28Fae07632 CDS CDS | 0.5  | 24.2 | 0.1  | E H       | COG0059                                                 | Ketol-acid reductoisomerase                                                                                                                                                                                                                                                                                                                                                                    |
| TS28Rum15403 CDS CDS | 0.5  | 24.5 | 0.1  | E H       | COG0079 COG1492 COG2158 COG1797                         | Histidinol-phosphate/aromatic aminotransferase and cobyrinic acid decarboxylase Cobyrinic acid synthase Uncharacterized protein containing a Zn-finger-like domain Cobyrinic acid a,c-diamide synthase                                                                                                                                                                                         |
| TS28Fae20464 CDS CDS | 0.9  | 78.7 | 0.0  | E H       | COG0059                                                 | Ketol-acid reductoisomerase                                                                                                                                                                                                                                                                                                                                                                    |
| TS28Eub4391 CDS CDS  | 0.5  | 56.5 | 0.0  | E H       | COG0079 COG1492 COG2158                                 | Histidinol-phosphate/aromatic aminotransferase and cobyrinic acid decarboxylase Cobyrinic acid synthase Uncharacterized protein containing a Zn-finger-like domain                                                                                                                                                                                                                             |
| Even0016 CDS CDS     | 4.0  | 1.0  | 13.2 | E H C     | COG1894 COG4624 COG1034 COG0493 COG1142 COG0543         | NADH:ubiquinone oxidoreductase, NADH-binding (51 kD) subunit Iron only hydrogenase large subunit, C-terminal domain NADH dehydrogenase/NADH:ubiquinone oxidoreductase 75 kD subunit (chain G) NADPH-dependent glutamate synthase beta chain and related oxidoreductases Fe-S-cluster-containing hydrogenase components 2 2-polyphenylphenol hydroxylase and related flavodoxin oxidoreductases |
| Casp1736 CDS CDS     | 9.0  | 2.5  | 11.9 | E H C     | COG1894 COG4624 COG1034 COG0493 COG1142 COG0543         | NADH:ubiquinone oxidoreductase, NADH-binding (51 kD) subunit Iron only hydrogenase large subunit, C-terminal domain NADH dehydrogenase/NADH:ubiquinone oxidoreductase 75 kD subunit (chain G) NADPH-dependent glutamate synthase beta chain and related oxidoreductases Fe-S-cluster-containing hydrogenase components 2 2-polyphenylphenol hydroxylase and related flavodoxin oxidoreductases |
| Dlon1448 CDS CDS     | 2.0  | 0.5  | 13.2 | E I       | COG3581 COG3580 COG1924 COG1775                         | Uncharacterized protein conserved in bacteria Uncharacterized protein conserved in bacteria Activator of 2-hydroxyglutaryl-CoA dehydratase (HSP70-class ATPase domain) Benzoyl-CoA reductase/2-hydroxyglutaryl-CoA dehydratase subunit, BerC/BadD/HgdB                                                                                                                                         |
| TS29Rum03420 CDS CDS | 4.0  | 1.0  | 13.2 | E J       | COG0124 COG3705                                         | Histidyl-tRNA synthetase ATP phosphoribosyltransferase involved in histidine biosynthesis                                                                                                                                                                                                                                                                                                      |
| TS28Clo00472 CDS CDS | 1.0  | 40.0 | 0.1  | E K       | COG1725 COG1167                                         | Predicted transcriptional regulators Transcriptional regulators containing a DNA-binding HTH domain and an aminotransferase domain (MocR family) and their eukaryotic orthologs                                                                                                                                                                                                                |
| Bste2832 CDS CDS     | 10.0 | 3.0  | 11.0 | E K M U Q | COG0793 COG3291 COG1506 COG4946 COG0823 COG1228 COG3710 | Periplasmic protease FOG: PKD repeat Dipeptidyl aminopeptidases/acylaminoacyl-peptidases Uncharacterized protein related to the periplasmic component of the Tol biopolymer transport system Periplasmic component of the Tol biopolymer transport system Imidazolonepropionase and related amidohydrolases DNA-binding winged-HTH domains                                                     |

|                               |      |       |      |       |                                                                                                                 |                                                                                                                                                                                                                                                                                                                                                                                                                                                                                                                                                                                                                                     |
|-------------------------------|------|-------|------|-------|-----------------------------------------------------------------------------------------------------------------|-------------------------------------------------------------------------------------------------------------------------------------------------------------------------------------------------------------------------------------------------------------------------------------------------------------------------------------------------------------------------------------------------------------------------------------------------------------------------------------------------------------------------------------------------------------------------------------------------------------------------------------|
| TS28Clo01679 CDS CDS          | 3.0  | 247.0 | 0.0  | E K T | COG0642 COG2202 COG0834 COG3452 COG2770 COG0784 COG3614 COG4252 COG2198 COG2203 COG3300 COG3437 COG3706 COG3447 | Signal transduction histidine kinase FOG: PAS/PAC domain ABC-type amino acid transport/signal transduction systems, periplasmic component/domain Predicted periplasmic ligand-binding sensor domain FOG: HAMP domain FOG: CheY-like receiver Predicted periplasmic ligand-binding sensor domain Predicted transmembrane sensor domain FOG: HPT domain FOG: GAF domain MHYT domain (predicted integral membrane sensor domain) Response regulator containing a CheY-like receiver domain and an HD-GYP domain Response regulator containing a CheY-like receiver domain and a GGDEF domain Predicted integral membrane sensor domain |
| TS28Clo00473 CDS CDS          | 1.0  | 65.0  | 0.1  | E L V | COG1131 COG1125 COG3666 COG4152                                                                                 | ABC-type multidrug transport system, ATPase component ABC-type proline/glycine betaine transport systems, ATPase components Transposase and inactivated derivatives ABC-type uncharacterized transport system, ATPase component                                                                                                                                                                                                                                                                                                                                                                                                     |
| Msmi740960 CDS CDS            | 5.0  | 0.3   | 66.1 | E M   | COG0329                                                                                                         | Dihydrodipicolinate synthase/N-acetylneuraminate lyase                                                                                                                                                                                                                                                                                                                                                                                                                                                                                                                                                                              |
| Msmi750719 CDS CDS            | 6.7  | 0.6   | 37.8 | E M   | COG0329                                                                                                         | Dihydrodipicolinate synthase/N-acetylneuraminate lyase                                                                                                                                                                                                                                                                                                                                                                                                                                                                                                                                                                              |
| TS28RumUnc0889 CDS CDS        | 18.0 | 3.0   | 19.8 | E P   | COG0601 COG4174                                                                                                 | ABC-type dipeptide/oligopeptide/nickel transport systems, permease components ABC-type uncharacterized transport system, permease component                                                                                                                                                                                                                                                                                                                                                                                                                                                                                         |
| TS28RumUnc0891 CDS CDS        | 17.0 | 4.0   | 14.1 | E P   | COG1173                                                                                                         | ABC-type dipeptide/oligopeptide/nickel transport systems, permease components                                                                                                                                                                                                                                                                                                                                                                                                                                                                                                                                                       |
| TS28Clo01454 CDS CDS          | 2.0  | 72.0  | 0.1  | E P   | COG1121 COG1125 COG1122                                                                                         | ABC-type Mn/Zn transport systems, ATPase component ABC-type proline/glycine betaine transport systems, ATPase components ABC-type cobalt transport system, ATPase component                                                                                                                                                                                                                                                                                                                                                                                                                                                         |
| TS28Fae16492 CDS CDS          | 2.0  | 128.5 | 0.1  | E P   | COG0444 COG1123                                                                                                 | ABC-type dipeptide/oligopeptide/nickel transport system, ATPase component ATPase components of various ABC-type transport systems, contain duplicated ATPase                                                                                                                                                                                                                                                                                                                                                                                                                                                                        |
| TS28Col1410 CDS CDS           | 0.3  | 52.0  | 0.0  | E P V | COG1131 COG1123 COG3842 COG1122                                                                                 | ABC-type multidrug transport system, ATPase component ATPase components of various ABC-type transport systems, contain duplicated ATPase ABC-type spermidine/putrescine transport systems, ATPase components ABC-type cobalt transport system, ATPase component                                                                                                                                                                                                                                                                                                                                                                     |
| TS28Eub8604 CDS CDS           | 0.5  | 62.0  | 0.0  | E Q   | COG3191                                                                                                         | L-aminopeptidase/D-esterase                                                                                                                                                                                                                                                                                                                                                                                                                                                                                                                                                                                                         |
| TS28RumUnc0955 CDS CDS        | 13.0 | 2.0   | 21.5 | E T   | COG0834                                                                                                         | ABC-type amino acid transport/signal transduction systems, periplasmic component/domain                                                                                                                                                                                                                                                                                                                                                                                                                                                                                                                                             |
| TS29Fae00833 CDS CDS          | 3.5  | 1.0   | 11.6 | E T   | COG0834                                                                                                         | ABC-type amino acid transport/signal transduction systems, periplasmic component/domain                                                                                                                                                                                                                                                                                                                                                                                                                                                                                                                                             |
| TS28Met1664 CDS CDS           | 22.8 | 7.1   | 10.6 | E T   | COG0834                                                                                                         | ABC-type amino acid transport/signal transduction systems, periplasmic component/domain                                                                                                                                                                                                                                                                                                                                                                                                                                                                                                                                             |
| TS28Fae20816 CDS CDS          | 1.0  | 38.0  | 0.1  | E T   | COG0834 COG0765 COG4160                                                                                         | ABC-type amino acid transport/signal transduction systems, periplasmic component/domain ABC-type amino acid transport system, permease component ABC-type arginine/histidine transport system, permease component                                                                                                                                                                                                                                                                                                                                                                                                                   |
| TS28Rum00298 CDS CDS          | 0.5  | 23.5  | 0.1  | E T   | COG0834 COG0765 COG4160                                                                                         | ABC-type amino acid transport/signal transduction systems, periplasmic component/domain ABC-type amino acid transport system, permease component ABC-type arginine/histidine transport system, permease component                                                                                                                                                                                                                                                                                                                                                                                                                   |
| TS28Fae16623 CDS CDS          | 1.0  | 53.5  | 0.1  | E T   | COG0834 COG0765                                                                                                 | ABC-type amino acid transport/signal transduction systems, periplasmic component/domain ABC-type amino acid transport system, permease component                                                                                                                                                                                                                                                                                                                                                                                                                                                                                    |
| TS28Fae19983 CDS CDS          | 0.3  | 38.5  | 0.0  | E T   | COG0834                                                                                                         | ABC-type amino acid transport/signal transduction systems, periplasmic component/domain                                                                                                                                                                                                                                                                                                                                                                                                                                                                                                                                             |
| TS29Bac10849 CDS CDS          | 4.0  | 1.0   | 13.2 | E V   | COG2755 COG1680 COG3876                                                                                         | Lysophospholipase L1 and related esterases Beta-lactamase class C and other penicillin binding proteins Uncharacterized protein conserved in bacteria                                                                                                                                                                                                                                                                                                                                                                                                                                                                               |
| Cint665 CDS CDS               | 12.7 | 0.5   | 83.8 | F     | COG0047 COG0046                                                                                                 | Phosphoribosylformylglycinamide (FGAM) synthase, glutamine amidotransferase domain Phosphoribosylformylglycinamide (FGAM) synthase, synthetase domain                                                                                                                                                                                                                                                                                                                                                                                                                                                                               |
| Msmi750496 CDS CDS            | 27.4 | 1.9   | 47.3 | F     | COG0047                                                                                                         | Phosphoribosylformylglycinamide (FGAM) synthase, glutamine amidotransferase domain                                                                                                                                                                                                                                                                                                                                                                                                                                                                                                                                                  |
| Msmi741181 CDS CDS            | 27.4 | 1.9   | 47.3 | F     | COG0047                                                                                                         | Phosphoribosylformylglycinamide (FGAM) synthase, glutamine amidotransferase domain                                                                                                                                                                                                                                                                                                                                                                                                                                                                                                                                                  |
| TS29Fae00691 CDS CDS          | 6.5  | 0.5   | 43.0 | F     | COG0151                                                                                                         | Phosphoribosylamine-glycine ligase                                                                                                                                                                                                                                                                                                                                                                                                                                                                                                                                                                                                  |
| Cspi0866 CDS CDS              | 12.0 | 1.0   | 39.7 | F     | COG0152                                                                                                         | Phosphoribosylaminoimidazole succinocarboxamide (SAICAR) synthase                                                                                                                                                                                                                                                                                                                                                                                                                                                                                                                                                                   |
| Msmi751253 CDS CDS            | 5.8  | 0.5   | 38.0 | F     | COG0503 COG0461                                                                                                 | Adenine/guanine phosphoribosyltransferases and related PRPP-binding proteins Orotate phosphoribosyltransferase                                                                                                                                                                                                                                                                                                                                                                                                                                                                                                                      |
| Msmi740424 CDS CDS            | 5.8  | 0.5   | 38.0 | F     | COG0503 COG0461                                                                                                 | Adenine/guanine phosphoribosyltransferases and related PRPP-binding proteins Orotate phosphoribosyltransferase                                                                                                                                                                                                                                                                                                                                                                                                                                                                                                                      |
| Anu0106 CDS CDS               | 11.0 | 1.0   | 36.4 | F     | COG0504                                                                                                         | CTP synthase (UTP-ammonia lyase)                                                                                                                                                                                                                                                                                                                                                                                                                                                                                                                                                                                                    |
| HPAG10269 CDS chlorohydrolase | 11.0 | 1.0   | 36.4 | F     | COG0402                                                                                                         | Cytosine deaminase and related metal-dependent hydrolases                                                                                                                                                                                                                                                                                                                                                                                                                                                                                                                                                                           |
| TS28Met0451 CDS CDS           | 5.3  | 0.5   | 34.7 | F     | COG0461 COG0503                                                                                                 | Orotate phosphoribosyltransferase Adenine/guanine phosphoribosyltransferases and related PRPP-binding proteins                                                                                                                                                                                                                                                                                                                                                                                                                                                                                                                      |
| TS28Met1239 CDS CDS           | 5.2  | 0.5   | 34.2 | F     | COG0461                                                                                                         | Orotate phosphoribosyltransferase                                                                                                                                                                                                                                                                                                                                                                                                                                                                                                                                                                                                   |
| Chy11127 CDS CDS              | 9.0  | 1.0   | 29.8 | F     | COG0047 COG0046                                                                                                 | Phosphoribosylformylglycinamide (FGAM) synthase, glutamine amidotransferase domain Phosphoribosylformylglycinamide (FGAM) synthase, synthetase domain                                                                                                                                                                                                                                                                                                                                                                                                                                                                               |
| Ebf0507 CDS CDS               | 8.0  | 1.0   | 26.5 | F     | COG1328                                                                                                         | Oxygen-sensitive ribonucleoside-triphosphate reductase                                                                                                                                                                                                                                                                                                                                                                                                                                                                                                                                                                              |
| Msmi741499 CDS CDS            | 11.9 | 1.5   | 26.3 | F     | COG0504                                                                                                         | CTP synthase (UTP-ammonia lyase)                                                                                                                                                                                                                                                                                                                                                                                                                                                                                                                                                                                                    |
| Cbo14268 CDS CDS              | 7.0  | 1.0   | 23.1 | F     | COG0138 COG0299                                                                                                 | AICAR transformylase/IMP cyclohydrolase PurH (only IMP cyclohydrolase domain in AfuI) Folate-dependent phosphoribosylglucosyltransferase formyltransferase PurN                                                                                                                                                                                                                                                                                                                                                                                                                                                                     |
| TS29Bac08157 CDS CDS          | 4.3  | 0.7   | 21.5 | F     | COG0572                                                                                                         | Uridine kinase                                                                                                                                                                                                                                                                                                                                                                                                                                                                                                                                                                                                                      |
| Msmi751353 CDS CDS            | 3.3  | 0.5   | 21.5 | F     | COG0717                                                                                                         | Deoxyxevtidine deaminase                                                                                                                                                                                                                                                                                                                                                                                                                                                                                                                                                                                                            |
| TS29Bac02632 CDS CDS          | 6.5  | 1.0   | 21.5 | F     | COG0105                                                                                                         | Nucleoside diphosphate kinase                                                                                                                                                                                                                                                                                                                                                                                                                                                                                                                                                                                                       |
| Msmi750750 CDS CDS            | 3.1  | 0.5   | 20.4 | F     | COG1781                                                                                                         | Aspartate carbamoyltransferase, regulatory subunit                                                                                                                                                                                                                                                                                                                                                                                                                                                                                                                                                                                  |
| Beat0750 CDS CDS              | 6.0  | 1.0   | 19.8 | F     | COG2233                                                                                                         | Xanthine/uracil permeases                                                                                                                                                                                                                                                                                                                                                                                                                                                                                                                                                                                                           |



|                      |       |       |      |   |                 |                                                                                                                                                       |
|----------------------|-------|-------|------|---|-----------------|-------------------------------------------------------------------------------------------------------------------------------------------------------|
| Bste1926 CDS CDS     | 3.0   | 0.5   | 19.8 | F | COG1864         | DNA/RNA endonuclease G, NUC1                                                                                                                          |
| Aeod1257 CDS CDS     | 6.0   | 1.0   | 19.8 | F | COG1457         | Purine-cytosine permease and related proteins                                                                                                         |
| Cspi1715 CDS CDS     | 6.0   | 1.0   | 19.8 | F | COG1328         | Oxygen-sensitive ribonucleoside-triphosphate reductase                                                                                                |
| Pmer0612 CDS CDS     | 18.0  | 3.0   | 19.8 | F | COG0295         | Cytidine deaminase                                                                                                                                    |
| TS28Bac0921 CDS CDS  | 3.0   | 0.5   | 19.8 | F | COG0232         | dGTP triphosphohydrolase                                                                                                                              |
| ShigspD91916 CDS CDS | 6.0   | 1.0   | 19.8 | F | COG0044         | Dihydroorotase and related cyclic amidohydrolases                                                                                                     |
| Pmer1473 CDS CDS     | 8.3   | 1.5   | 18.4 | F | COG0775 COG2820 | Nucleoside phosphorylase/Uridine phosphorylase                                                                                                        |
| TS29Eub1678 CDS CDS  | 2.7   | 0.5   | 17.6 | F | COG0044         | Dihydroorotase and related cyclic amidohydrolases                                                                                                     |
| TS29Fae06044 CDS CDS | 10.6  | 2.0   | 17.5 | F | COG1328         | Oxygen-sensitive ribonucleoside-triphosphate reductase                                                                                                |
| TS29Bac05330 CDS CDS | 2.5   | 0.5   | 16.5 | F | COG2759         | Formyltetrahydrofolate synthetase                                                                                                                     |
| TS29Rum07475 CDS CDS | 2.5   | 0.5   | 16.5 | F | COG2233         | Xanthine/uracil permeases                                                                                                                             |
| Cbo13219 CDS CDS     | 5.0   | 1.0   | 16.5 | F | COG0461         | Orotate phosphoribosyltransferase                                                                                                                     |
| Bryfor3729 CDS CDS   | 5.0   | 1.0   | 16.5 | F | COG0047 COG0046 | Phosphoribosylformylglycinamide (FGAM) synthase, glutamine amidotransferase domain Phosphoribosylformylglycinamide (FGAM) synthase, synthetase domain |
| Msmi750498 CDS CDS   | 6.7   | 1.3   | 16.5 | F | COG0152         | Phosphoribosylaminoimidazolesuccinocarboxamide (SAICAR) synthase                                                                                      |
| Msmi751115 CDS CDS   | 8.4   | 1.8   | 15.9 | F | COG0151 COG0152 | Phosphoribosylamine-glycine ligase Phosphoribosylaminoimidazolesuccinocarboxamide (SAICAR) synthase                                                   |
| Bdor2354 CDS CDS     | 9.5   | 2.0   | 15.7 | F | COG0540         | Aspartate carbamoyltransferase, catalytic chain                                                                                                       |
| Msmi750620 CDS CDS   | 9.3   | 2.0   | 15.4 | F | COG1102         | Cytidylate kinase                                                                                                                                     |
| TS28Par0793 CDS CDS  | 6.8   | 1.5   | 15.1 | F | COG0150         | Phosphoribosylaminoimidazole (AIR) synthetase                                                                                                         |
| TS28Fae06915 CDS CDS | 9.0   | 2.0   | 14.9 | F | COG2820         | Uridine phosphorylase                                                                                                                                 |
| Begg1811 CDS CDS     | 18.0  | 4.0   | 14.9 | F | COG0572         | Uridine kinase                                                                                                                                        |
| Even0516 CDS CDS     | 4.5   | 1.0   | 14.9 | F | COG0563         | Adenylate kinase and related kinases                                                                                                                  |
| Msmi750709 CDS CDS   | 2.8   | 0.7   | 14.1 | F | COG0461         | Orotate phosphoribosyltransferase                                                                                                                     |
| Bova2806 CDS CDS     | 2.7   | 0.7   | 13.4 | F | COG0504         | CTP synthase (UTP-ammonia lyase)                                                                                                                      |
| TS28Fae10285 CDS CDS | 8.0   | 2.0   | 13.2 | F | COG0528         | Uridylate kinase                                                                                                                                      |
| Bste1720 CDS CDS     | 16.0  | 4.0   | 13.2 | F | COG0041 COG0151 | Phosphoribosylcarboxyaminoimidazole (NCAIR) mutase Phosphoribosylamine-glycine ligase                                                                 |
| TS28Met1124 CDS CDS  | 29.4  | 7.9   | 12.3 | F | COG0047         | Phosphoribosylformylglycinamide (FGAM) synthase, glutamine amidotransferase domain                                                                    |
| TS28Bac3162 CDS CDS  | 4.3   | 1.2   | 12.3 | F | COG0572         | Uridine kinase                                                                                                                                        |
| TS28Rum01303 CDS CDS | 63.0  | 17.0  | 12.3 | F | COG2759         | Formyltetrahydrofolate synthetase                                                                                                                     |
| Bste1042 CDS CDS     | 11.0  | 3.0   | 12.1 | F | COG0540         | Aspartate carbamoyltransferase, catalytic chain                                                                                                       |
| TS29Rum13298 CDS CDS | 3.7   | 1.0   | 12.1 | F | COG0151 COG0041 | Phosphoribosylamine-glycine ligase Phosphoribosylcarboxyaminoimidazole (NCAIR) mutase                                                                 |
| TS28Rum03196 CDS CDS | 3.7   | 1.0   | 12.1 | F | COG0151 COG0041 | Phosphoribosylamine-glycine ligase Phosphoribosylcarboxyaminoimidazole (NCAIR) mutase                                                                 |
| Rtor0045 CDS CDS     | 3.7   | 1.0   | 12.1 | F | COG0041 COG0151 | Phosphoribosylcarboxyaminoimidazole (NCAIR) mutase Phosphoribosylamine-glycine ligase                                                                 |
| Rumhyd0001 CDS CDS   | 7.0   | 2.0   | 11.6 | F | COG2759         | Formyltetrahydrofolate synthetase                                                                                                                     |
| Bdor2353 CDS CDS     | 7.0   | 2.0   | 11.6 | F | COG1781         | Aspartate carbamoyltransferase, regulatory subunit                                                                                                    |
| TS28Rum11371 CDS CDS | 26.0  | 8.0   | 10.7 | F | COG2065         | Pyrimidine operon attenuation protein/uracil phosphoribosyltransferase                                                                                |
| TS29Fae00686 CDS CDS | 6.5   | 2.0   | 10.7 | F | COG0152         | Phosphoribosylaminoimidazolesuccinocarboxamide (SAICAR) synthase                                                                                      |
| Bdor2886 CDS CDS     | 30.3  | 9.5   | 10.6 | F | COG0138         | AICAR transformylase/IMP cyclohydrolase PurH (only IMP cyclohydrolase domain in Aful)                                                                 |
| TS28Fae07641 CDS CDS | 19.0  | 6.0   | 10.5 | F | COG0035         | Uracil phosphoribosyltransferase                                                                                                                      |
| TS28Ali2042 CDS CDS  | 161.0 | 51.0  | 10.4 | F | COG0528         | Uridylate kinase                                                                                                                                      |
| TS28Ali1949 CDS CDS  | 164.0 | 52.0  | 10.4 | F | COG1864         | DNA/RNA endonuclease G, NUC1                                                                                                                          |
| Msmi750213 CDS CDS   | 7.8   | 2.5   | 10.3 | F | COG0504         | CTP synthase (UTP-ammonia lyase)                                                                                                                      |
| Robe3904 CDS CDS     | 0.5   | 16.7  | 0.1  | F | COG0015         | Adenylosuccinate lyase                                                                                                                                |
| TS28Eub7581 CDS CDS  | 1.0   | 34.0  | 0.1  | F | COG0461         | Orotate phosphoribosyltransferase                                                                                                                     |
| Bpse1102 CDS CDS     | 0.3   | 8.7   | 0.1  | F | COG0167         | Dihydroorotate dehydrogenase                                                                                                                          |
| TS28Dor1853 CDS CDS  | 0.5   | 17.5  | 0.1  | F | COG0504         | CTP synthase (UTP-ammonia lyase)                                                                                                                      |
| TS28Fae10590 CDS CDS | 1.0   | 35.0  | 0.1  | F | COG0295 COG0813 | Cytidine deaminase Purine-nucleoside phosphorylase                                                                                                    |
| TS28Clo01211 CDS CDS | 6.0   | 213.0 | 0.1  | F | COG2759         | Formyltetrahydrofolate synthetase                                                                                                                     |
| TS28Fae08721 CDS CDS | 0.3   | 10.0  | 0.1  | F | COG0232         | dGTP triphosphohydrolase                                                                                                                              |
| TS28Fae15732 CDS CDS | 1.0   | 41.0  | 0.1  | F | COG0519         | GMP synthase, PP-ATPase domain/subunit                                                                                                                |
| CspSS22435 CDS CDS   | 1.0   | 44.5  | 0.1  | F | COG0047 COG0046 | Phosphoribosylformylglycinamide (FGAM) synthase, glutamine amidotransferase domain Phosphoribosylformylglycinamide (FGAM) synthase, synthetase domain |
| TS29Bif1205 CDS CDS  | 0.3   | 11.7  | 0.1  | F | COG0167         | Dihydroorotate dehydrogenase                                                                                                                          |
| TS28Bac3472 CDS CDS  | 0.2   | 11.0  | 0.1  | F | COG0047 COG0046 | Phosphoribosylformylglycinamide (FGAM) synthase, glutamine amidotransferase domain Phosphoribosylformylglycinamide (FGAM) synthase, synthetase domain |
| TS28Eub7003 CDS CDS  | 2.0   | 103.0 | 0.1  | F | COG0504         | CTP synthase (UTP-ammonia lyase)                                                                                                                      |
| TS28Met0467 CDS CDS  | 0.7   | 37.0  | 0.1  | F | COG0046         | Phosphoribosylformylglycinamide (FGAM) synthase, synthetase domain                                                                                    |
| TS28Clo0527 CDS CDS  | 1.0   | 53.0  | 0.1  | F | COG0756         | dUTPase                                                                                                                                               |
| TS28Fae18262 CDS CDS | 1.0   | 56.0  | 0.1  | F | COG0563         | Adenylate kinase and related kinases                                                                                                                  |
| TS28Eub5187 CDS CDS  | 1.5   | 94.0  | 0.1  | F | COG1001         | Adenine deaminase                                                                                                                                     |
| Dlon2581 CDS CDS     | 0.5   | 33.5  | 0.0  | F | COG1328         | Oxygen-sensitive ribonucleoside-triphosphate reductase                                                                                                |
| TS28Eub0954 CDS CDS  | 0.5   | 33.5  | 0.0  | F | COG0034         | Glutamine phosphoribosylpyrophosphate amidotransferase                                                                                                |
| TS28Fae16694 CDS CDS | 0.5   | 34.3  | 0.0  | F | COG0104         | Adenylosuccinate synthase                                                                                                                             |
| TS28Eub3869 CDS CDS  | 1.3   | 102.5 | 0.0  | F | COG1328         | Oxygen-sensitive ribonucleoside-triphosphate reductase                                                                                                |
| TS28Bif3806 CDS CDS  | 0.3   | 25.7  | 0.0  | F | COG0167         | Dihydroorotate dehydrogenase                                                                                                                          |
| Eeli1739 CDS CDS     | 0.1   | 13.0  | 0.0  | F | COG0047 COG0046 | Phosphoribosylformylglycinamide (FGAM) synthase, glutamine amidotransferase domain Phosphoribosylformylglycinamide (FGAM) synthase, synthetase domain |
| TS28Clo00504 CDS CDS | 1.0   | 108.5 | 0.0  | F | COG1816         | Adenosine deaminase                                                                                                                                   |
| TS28Fae20643 CDS CDS | 0.3   | 27.3  | 0.0  | F | COG0232         | dGTP triphosphohydrolase                                                                                                                              |

|                                   |         |       |         |       |                                                                                                         |                                                                                                                                                                                                                                                                                                                                                                                                                                                                                                                                                                                                                                                                                                                                                                      |
|-----------------------------------|---------|-------|---------|-------|---------------------------------------------------------------------------------------------------------|----------------------------------------------------------------------------------------------------------------------------------------------------------------------------------------------------------------------------------------------------------------------------------------------------------------------------------------------------------------------------------------------------------------------------------------------------------------------------------------------------------------------------------------------------------------------------------------------------------------------------------------------------------------------------------------------------------------------------------------------------------------------|
| TS28Bif4810 CDS CDS               | 0.3     | 38.9  | 0.0     | F     | COG0047 COG0046                                                                                         | Phosphoribosylformylglycinamide (FGAM) synthase, glutamine amidotransferase domain Phosphoribosylformylglycinamide (FGAM) synthase, synthetase domain                                                                                                                                                                                                                                                                                                                                                                                                                                                                                                                                                                                                                |
| TS28Eub3856 CDS CDS               | 0.3     | 78.0  | 0.0     | F     | COG0504                                                                                                 | CTP synthase (UTP-ammonia lyase)                                                                                                                                                                                                                                                                                                                                                                                                                                                                                                                                                                                                                                                                                                                                     |
| Robe3819 CDS CDS                  | 0.1     | 37.3  | 0.0     | F     | COG0047 COG0046                                                                                         | Phosphoribosylformylglycinamide (FGAM) synthase, glutamine amidotransferase domain Phosphoribosylformylglycinamide (FGAM) synthase, synthetase domain                                                                                                                                                                                                                                                                                                                                                                                                                                                                                                                                                                                                                |
| TS28Rum12474 CDS CDS              | 0.7     | 35.0  | 0.1     | F C   | COG2080 COG1529 COG4631                                                                                 | Aerobic-type carbon monoxide dehydrogenase, small subunit CoxS/CutS homologs Aerobic-type carbon monoxide dehydrogenase, large subunit CoxL/CutL homologs Xanthine dehydrogenase, molybdopterin-binding subunit B                                                                                                                                                                                                                                                                                                                                                                                                                                                                                                                                                    |
| TS28Fae21470 CDS CDS              | 0.5     | 23.0  | 0.1     | F C H | COG0167 COG0543 COG1146                                                                                 | Dihydroorotate dehydrogenase 2-polyprenylphenol hydroxylase and related flavodoxin oxidoreductases Ferredoxin                                                                                                                                                                                                                                                                                                                                                                                                                                                                                                                                                                                                                                                        |
| TS29Fae06953 CDS CDS              | 5.0     | 1.0   | 16.5    | F H   | COG0283 COG1160 COG0414                                                                                 | Cytidylate kinase Predicted GTPases Panthothenate synthetase                                                                                                                                                                                                                                                                                                                                                                                                                                                                                                                                                                                                                                                                                                         |
| TS28Bac4451 CDS CDS               | 5.0     | 1.0   | 16.5    | F J   | COG0127 COG0689                                                                                         | Xanthosine triphosphate pyrophosphatase RNase PH                                                                                                                                                                                                                                                                                                                                                                                                                                                                                                                                                                                                                                                                                                                     |
| TS28Clo01410 CDS CDS              | 1.0     | 241.0 | 0.0     | F J   | COG0441 COG0572                                                                                         | Threonyl-tRNA synthetase Uridine kinase                                                                                                                                                                                                                                                                                                                                                                                                                                                                                                                                                                                                                                                                                                                              |
| TS28Fae12958 CDS CDS              | 1.0     | 41.5  | 0.1     | F J D | COG0037 COG0634 COG0590                                                                                 | Predicted ATPase of the PP-loop superfamily implicated in cell cycle control Hyoxanthine-guanine phosphoribosyltransferase Cytosine/adenosine deaminases                                                                                                                                                                                                                                                                                                                                                                                                                                                                                                                                                                                                             |
| TS28Dor2839 CDS CDS               | 14.0    | 4.0   | 11.6    | F J L | COG1194 COG1051 COG1670 COG0494                                                                         | A/G-specific DNA glycosylase ADP-ribose pyrophosphatase Acetyltransferases, including N-acetylases of ribosomal proteins NTP pyrophosphohydrolases including oxidative damage repair enzymes                                                                                                                                                                                                                                                                                                                                                                                                                                                                                                                                                                         |
| TS29Fae08488 CDS CDS              | 2.5     | 0.5   | 16.5    | F K   | COG2207 COG2169 COG3708 COG4977                                                                         | AraC-type DNA-binding domain-containing proteins Adenosine deaminase Uncharacterized protein conserved in bacteria Transcriptional regulator containing an amidase domain and an AraC-type DNA-binding HTH domain                                                                                                                                                                                                                                                                                                                                                                                                                                                                                                                                                    |
| TS29Fae01179 CDS CDS              | 7.0     | 1.5   | 15.4    | F K T | COG4753 COG2207 COG4936 COG2169 COG3708 COG4977                                                         | Response regulator containing CheY-like receiver domain and AraC-type DNA-binding domain AraC-type DNA-binding domain-containing proteins Predicted sensor domain Adenosine deaminase Uncharacterized protein conserved in bacteria Transcriptional regulator containing an amidase domain and an AraC-type DNA-binding HTH domain                                                                                                                                                                                                                                                                                                                                                                                                                                   |
| TS28Fae21176 CDS CDS              | 1.5     | 54.5  | 0.1     | F K T | COG5002 COG2202 COG0745 COG4753 COG2207 COG2204 COG0784 COG3437 COG3279 COG4936 COG3706 COG2197 COG2169 | Signal transduction histidine kinase FOG: PAS/PAC domain Response regulators consisting of a CheY-like receiver domain and a winged-helix DNA-binding domain Response regulator containing CheY-like receiver domain and AraC-type DNA-binding domain AraC-type DNA-binding domain-containing proteins Response regulator containing CheY-like receiver, AAA-type ATPase, and DNA-binding domains FOG: CheY-like receiver Response regulator containing a CheY-like receiver domain and an HD-GYP domain Response regulator of the LytR/AlgR family Predicted sensor domain Response regulator containing a CheY-like receiver domain and a GGDEF domain Response regulator containing a CheY-like receiver domain and an HTH DNA-binding domain Adenosine deaminase |
| TS28Bac8321 CDS CDS               | 22.0    | 5.0   | 14.6    | F T   | COG0737 COG3103                                                                                         | 5'-nucleotidase/2',3'-cyclic phosphodiesterase and related esterases SH3 domain protein                                                                                                                                                                                                                                                                                                                                                                                                                                                                                                                                                                                                                                                                              |
| Chv12219 CDS CDS                  | 1,920.3 | 1.0   | 6,350.3 | G     | COG1879                                                                                                 | ABC-type sugar transport system, periplasmic component                                                                                                                                                                                                                                                                                                                                                                                                                                                                                                                                                                                                                                                                                                               |
| BactD23013 CDS CDS                | 334.8   | 1.0   | 1,107.1 | G     | COG0524                                                                                                 | Sugar kinases, ribokinase family                                                                                                                                                                                                                                                                                                                                                                                                                                                                                                                                                                                                                                                                                                                                     |
| Bova1522 CDS CDS                  | 334.8   | 2.0   | 553.5   | G     | COG0524                                                                                                 | Sugar kinases, ribokinase family                                                                                                                                                                                                                                                                                                                                                                                                                                                                                                                                                                                                                                                                                                                                     |
| TS28Rum15781 CDS CDS              | 763.0   | 12.0  | 210.3   | G     | COG2017                                                                                                 | Galactose mutarotase and related enzymes                                                                                                                                                                                                                                                                                                                                                                                                                                                                                                                                                                                                                                                                                                                             |
| Dlon0471 CDS CDS                  | 49.0    | 1.0   | 162.0   | G     | COG1653                                                                                                 | ABC-type sugar transport system, periplasmic component                                                                                                                                                                                                                                                                                                                                                                                                                                                                                                                                                                                                                                                                                                               |
| Ccom2466 CDS CDS                  | 181.0   | 4.0   | 149.6   | G     | COG3345                                                                                                 | Alpha-galactosidase                                                                                                                                                                                                                                                                                                                                                                                                                                                                                                                                                                                                                                                                                                                                                  |
| Ehal2019 CDS CDS                  | 15.5    | 0.5   | 102.5   | G     | COG0448                                                                                                 | ADP-glucose pyrophosphorylase                                                                                                                                                                                                                                                                                                                                                                                                                                                                                                                                                                                                                                                                                                                                        |
| TS29Fae06721 CDS CDS              | 12.5    | 0.5   | 82.7    | G     | COG1874                                                                                                 | Beta-galactosidase                                                                                                                                                                                                                                                                                                                                                                                                                                                                                                                                                                                                                                                                                                                                                   |
| TS29Bac10833 CDS CDS              | 8.0     | 0.3   | 79.4    | G     | COG3934                                                                                                 | Endo-beta-mannanase                                                                                                                                                                                                                                                                                                                                                                                                                                                                                                                                                                                                                                                                                                                                                  |
| TS29Eub1284 CDS CDS               | 33.5    | 1.5   | 73.9    | G     | COG2182                                                                                                 | Maltose-binding periplasmic proteins/domains                                                                                                                                                                                                                                                                                                                                                                                                                                                                                                                                                                                                                                                                                                                         |
| Acol3408 CDS CDS                  | 20.0    | 1.0   | 66.1    | G     | COG0235                                                                                                 | Ribulose-5-phosphate 4-epimerase and related epimerases and aldolases                                                                                                                                                                                                                                                                                                                                                                                                                                                                                                                                                                                                                                                                                                |
| TS29Rum05495 CDS CDS              | 6.0     | 0.3   | 59.5    | G     | COG4409                                                                                                 | Neuraminidase (sialidase)                                                                                                                                                                                                                                                                                                                                                                                                                                                                                                                                                                                                                                                                                                                                            |
| Casp2021 CDS CDS                  | 61.5    | 3.5   | 58.1    | G     | COG0057                                                                                                 | Glyceraldehyde-3-phosphate dehydrogenase/erythrose-4-phosphate dehydrogenase                                                                                                                                                                                                                                                                                                                                                                                                                                                                                                                                                                                                                                                                                         |
| TS29Rum02336 CDS CDS              | 5.7     | 0.3   | 56.2    | G     | COG1879                                                                                                 | ABC-type sugar transport system, periplasmic component                                                                                                                                                                                                                                                                                                                                                                                                                                                                                                                                                                                                                                                                                                               |
| TS29Fae00079 CDS CDS              | 8.4     | 0.5   | 55.7    | G     | COG0296                                                                                                 | 1,4-alpha-glucan branching enzyme                                                                                                                                                                                                                                                                                                                                                                                                                                                                                                                                                                                                                                                                                                                                    |
| BVU3512 CDS 6-phosphofructokinase | 2.8     | 0.2   | 55.6    | G     | COG0205                                                                                                 | 6-phosphofructokinase                                                                                                                                                                                                                                                                                                                                                                                                                                                                                                                                                                                                                                                                                                                                                |
| Hfil3422 CDS CDS                  | 15.0    | 1.0   | 49.6    | G     | COG1879                                                                                                 | ABC-type sugar transport system, periplasmic component                                                                                                                                                                                                                                                                                                                                                                                                                                                                                                                                                                                                                                                                                                               |
| TS29Fae08283 CDS CDS              | 7.5     | 0.5   | 49.6    | G     | COG0149                                                                                                 | Triosephosphate isomerase                                                                                                                                                                                                                                                                                                                                                                                                                                                                                                                                                                                                                                                                                                                                            |
| TS28Ahi2244 CDS CDS               | 75.0    | 5.0   | 49.6    | G     | COG0057                                                                                                 | Glyceraldehyde-3-phosphate dehydrogenase/erythrose-4-phosphate dehydrogenase                                                                                                                                                                                                                                                                                                                                                                                                                                                                                                                                                                                                                                                                                         |
| Bxy13893 CDS CDS                  | 4.5     | 0.3   | 44.6    | G     | COG0363                                                                                                 | 6-phosphogluconolactonase/Glucosamine-6-phosphate isomerase/deaminase                                                                                                                                                                                                                                                                                                                                                                                                                                                                                                                                                                                                                                                                                                |
| Ehal0749 CDS CDS                  | 73.0    | 5.5   | 43.9    | G     | COG0296                                                                                                 | 1,4-alpha-glucan branching enzyme                                                                                                                                                                                                                                                                                                                                                                                                                                                                                                                                                                                                                                                                                                                                    |
| TS29Rum03526 CDS CDS              | 21.0    | 1.7   | 41.7    | G     | COG1653                                                                                                 | ABC-type sugar transport system, periplasmic component                                                                                                                                                                                                                                                                                                                                                                                                                                                                                                                                                                                                                                                                                                               |
| ShigspsD90525 CDS CDS             | 6.2     | 0.5   | 40.8    | G     | COG4677                                                                                                 | Pectin methyltransferase                                                                                                                                                                                                                                                                                                                                                                                                                                                                                                                                                                                                                                                                                                                                             |
| TS29Bac10838 CDS CDS              | 4.0     | 0.3   | 39.7    | G     | COG3250                                                                                                 | Beta-galactosidase/beta-glucuronidase                                                                                                                                                                                                                                                                                                                                                                                                                                                                                                                                                                                                                                                                                                                                |
| CspL21752 CDS CDS                 | 12.0    | 1.0   | 39.7    | G     | COG1803                                                                                                 | Methylglyoxal synthase                                                                                                                                                                                                                                                                                                                                                                                                                                                                                                                                                                                                                                                                                                                                               |
| Msmi751420 CDS CDS                | 7.9     | 0.7   | 39.3    | G     | COG1980                                                                                                 | Archaeal fructose 1,6-bisphosphatase                                                                                                                                                                                                                                                                                                                                                                                                                                                                                                                                                                                                                                                                                                                                 |
| CspM6212397 CDS CDS               | 11.2    | 1.0   | 37.0    | G     | COG0574 COG1080 COG4668 COG3412                                                                         | Phosphoenolpyruvate synthase/pyruvate phosphate dikinase Phosphoenolpyruvate-protein kinase (PTS system EI component in bacteria) Mannitol/fructose-specific phosphotransferase system, IIA domain Uncharacterized protein conserved in bacteria                                                                                                                                                                                                                                                                                                                                                                                                                                                                                                                     |
| TS29Bac08447 CDS CDS              | 5.5     | 0.5   | 36.4    | G     | COG0363                                                                                                 | 6-phosphogluconolactonase/Glucosamine-6-phosphate isomerase/deaminase                                                                                                                                                                                                                                                                                                                                                                                                                                                                                                                                                                                                                                                                                                |
| Buni1688 CDS CDS                  | 5.5     | 0.5   | 36.4    | G     | COG0363                                                                                                 | 6-phosphogluconolactonase/Glucosamine-6-phosphate isomerase/deaminase                                                                                                                                                                                                                                                                                                                                                                                                                                                                                                                                                                                                                                                                                                |

|                                  |       |      |      |   |                                 |                                                                                                                                                                                                                                                               |
|----------------------------------|-------|------|------|---|---------------------------------|---------------------------------------------------------------------------------------------------------------------------------------------------------------------------------------------------------------------------------------------------------------|
| Bdor1424 CDS CDS                 | 31.4  | 3.0  | 34.6 | G | COG0057                         | Glyceraldehyde-3-phosphate dehydrogenase/erythrose-4-phosphate dehydrogenase                                                                                                                                                                                  |
| TS28Dor1642 CDS CDS              | 10.0  | 1.0  | 33.1 | G | COG1925                         | Phosphotransferase system, HPr-related proteins                                                                                                                                                                                                               |
| Acol0367 CDS CDS                 | 10.0  | 1.0  | 33.1 | G | COG1879                         | ABC-type sugar transport system, periplasmic component                                                                                                                                                                                                        |
| TS29Fae04582 CDS CDS             | 5.0   | 0.5  | 33.1 | G | COG1082                         | Sugar phosphate isomerases/epimerases                                                                                                                                                                                                                         |
| Csvm3668 CDS CDS                 | 10.0  | 1.0  | 33.1 | G | COG0448                         | ADP-glucose pyrophosphorylase                                                                                                                                                                                                                                 |
| b0688 CDS phosphoglucomutase     | 9.4   | 1.0  | 31.1 | G | COG1109 COG0033                 | Phosphomannomutase Phosphoglucomutase                                                                                                                                                                                                                         |
| Cbol0676 CDS CDS                 | 9.3   | 1.0  | 30.9 | G | COG0448                         | ADP-glucose pyrophosphorylase                                                                                                                                                                                                                                 |
| TS29Bac00193 CDS CDS             | 3.1   | 0.3  | 30.7 | G | COG1830                         | DhnA-type fructose-1,6-bisphosphate aldolase and related enzymes                                                                                                                                                                                              |
| TS28Eub8790 CDS CDS              | 9.0   | 1.0  | 29.8 | G | COG4209                         | ABC-type polysaccharide transport system, permease component                                                                                                                                                                                                  |
| Bste2756 CDS CDS                 | 9.0   | 1.0  | 29.8 | G | COG3717                         | 5-keto-4-deoxyuronate isomerase                                                                                                                                                                                                                               |
| TS29Fae01192 CDS CDS             | 4.5   | 0.5  | 29.8 | G | COG3250                         | Beta-galactosidase/beta-glucuronidase                                                                                                                                                                                                                         |
| TS29Rum03806 CDS CDS             | 9.0   | 1.0  | 29.8 | G | COG1879 COG4213                 | ABC-type sugar transport system, periplasmic component ABC-type xylose transport system, periplasmic component                                                                                                                                                |
| ShigspD92138 CDS CDS             | 4.5   | 0.5  | 29.8 | G | COG1879 COG1172 COG4158 COG4214 | ABC-type sugar transport system, periplasmic component Ribose/xylose/arabinose/galactoside ABC-type transport systems, permease components Predicted ABC-type sugar transport system, permease component ABC-type xylose transport system, permease component |
| RintL13136 CDS CDS               | 9.0   | 1.0  | 29.8 | G | COG1820                         | N-acetylglucosamine-6-phosphate deacetylase                                                                                                                                                                                                                   |
| TS29Fae07187 CDS CDS             | 4.5   | 0.5  | 29.8 | G | COG1472                         | Beta-glucosidase-related glucosidases                                                                                                                                                                                                                         |
| Clep1252 CDS CDS                 | 9.0   | 1.0  | 29.8 | G | COG1082                         | Sugar phosphate isomerases/epimerases                                                                                                                                                                                                                         |
| Bxyl0043 CDS CDS                 | 4.5   | 0.5  | 29.8 | G | COG0800                         | 2-keto-3-deoxy-6-phosphogluconate aldolase                                                                                                                                                                                                                    |
| FpraM2120142 CDS CDS             | 3.0   | 0.3  | 29.8 | G | COG0448                         | ADP-glucose pyrophosphorylase                                                                                                                                                                                                                                 |
| TS28Par1403 CDS CDS              | 9.0   | 1.0  | 29.8 | G | COG0363                         | 6-phosphogluconolactonase/Glucosamine-6-phosphate isomerase/deaminase                                                                                                                                                                                         |
| Bryfor3653 CDS CDS               | 9.0   | 1.0  | 29.8 | G | COG0057                         | Glyceraldehyde-3-phosphate dehydrogenase/erythrose-4-phosphate dehydrogenase                                                                                                                                                                                  |
| Bdor3671 CDS CDS                 | 1.8   | 0.2  | 29.2 | G | COG1803                         | Methylglyoxal synthase                                                                                                                                                                                                                                        |
| ShigspD90765 CDS CDS             | 8.5   | 1.0  | 28.1 | G | COG1070                         | Sugar (nentulose and hexulose) kinases                                                                                                                                                                                                                        |
| TS28Ali2049 CDS CDS              | 165.0 | 20.0 | 27.3 | G | COG0191                         | Fructose/tagatose bisphosphate aldolase                                                                                                                                                                                                                       |
| Cspi0396 CDS CDS                 | 16.1  | 2.0  | 26.6 | G | COG1501                         | Alpha-glucosidases, family 31 of glycosyl hydrolases                                                                                                                                                                                                          |
| BactD12525 CDS CDS               | 4.0   | 0.5  | 26.5 | G | COG3507                         | Beta-xylosidase                                                                                                                                                                                                                                               |
| TS29Fae01183 CDS CDS             | 4.0   | 0.5  | 26.5 | G | COG3090 COG1593                 | TRAP-type C4-dicarboxylate transport system, small permease component TRAP-type C4-dicarboxylate transport system, large permease component                                                                                                                   |
| Bpse1884 CDS CDS                 | 2.7   | 0.3  | 26.5 | G | COG1653                         | ABC-type sugar transport system, periplasmic component                                                                                                                                                                                                        |
| Dlon1704 CDS CDS                 | 4.0   | 0.5  | 26.5 | G | COG1015                         | Phosphopentomutase                                                                                                                                                                                                                                            |
| b3526 CDS ketodeoxygluconokinase | 4.0   | 0.5  | 26.5 | G | COG0524 COG3718                 | Sugar kinases, ribokinase family Uncharacterized enzyme involved in inositol metabolism                                                                                                                                                                       |
| TS29Rum12278 CDS CDS             | 8.0   | 1.0  | 26.5 | G | COG0524                         | Sugar kinases, ribokinase family                                                                                                                                                                                                                              |
| Rtor0337 CDS CDS                 | 45.0  | 5.7  | 26.3 | G | COG1653                         | ABC-type sugar transport system, periplasmic component                                                                                                                                                                                                        |
| CspM6212277 CDS CDS              | 7.8   | 1.0  | 25.9 | G | COG1879                         | ABC-type sugar transport system, periplasmic component                                                                                                                                                                                                        |
| Msmi741412 CDS CDS               | 3.9   | 0.5  | 25.9 | G | COG1830                         | DhnA-type fructose-1,6-bisphosphate aldolase and related enzymes                                                                                                                                                                                              |
| Svar1991 CDS CDS                 | 7.8   | 1.0  | 25.6 | G | COG1129                         | ABC-type sugar transport system, ATPase component                                                                                                                                                                                                             |
| Rena1586 CDS CDS                 | 7.5   | 1.0  | 24.8 | G | COG3408                         | Glycogen debranching enzyme                                                                                                                                                                                                                                   |
| TS29Rum12478 CDS CDS             | 7.5   | 1.0  | 24.8 | G | COG3408                         | Glycogen debranching enzyme                                                                                                                                                                                                                                   |
| ShigspD90655 CDS CDS             | 7.5   | 1.0  | 24.8 | G | COG0448                         | ADP-glucose pyrophosphorylase                                                                                                                                                                                                                                 |
| Pmer3099 CDS CDS                 | 52.0  | 7.0  | 24.6 | G | COG0148                         | Enolase                                                                                                                                                                                                                                                       |
| BactD13756 CDS CDS               | 7.4   | 1.0  | 24.3 | G | COG0696                         | Phosphoglyceromutase                                                                                                                                                                                                                                          |
| Cspi0450 CDS CDS                 | 7.1   | 1.0  | 23.3 | G | COG1501                         | Alpha-glucosidases, family 31 of glycosyl hydrolases                                                                                                                                                                                                          |
| Cbol0656 CDS CDS                 | 7.0   | 1.0  | 23.1 | G | COG3839                         | ABC-type sugar transport systems, ATPase components                                                                                                                                                                                                           |
| BactD23254 CDS CDS               | 3.5   | 0.5  | 23.1 | G | COG3537                         | Putative alpha-1,2-mannosidase                                                                                                                                                                                                                                |
| TS28Bac0491 CDS CDS              | 7.0   | 1.0  | 23.1 | G | COG2407                         | L-fucose isomerase and related proteins                                                                                                                                                                                                                       |
| TS29Bac02903 CDS CDS             | 7.0   | 1.0  | 23.1 | G | COG2115                         | Xylose isomerase                                                                                                                                                                                                                                              |
| Cspi0065 CDS CDS                 | 7.0   | 1.0  | 23.1 | G | COG1523                         | Type II secretory pathway, pullulanase PulA and related glucosidases                                                                                                                                                                                          |
| TS29Bac04374 CDS CDS             | 4.7   | 0.7  | 23.1 | G | COG1501                         | Alpha-glucosidases, family 31 of glycosyl hydrolases                                                                                                                                                                                                          |
| Acol2156 CDS CDS                 | 7.0   | 1.0  | 23.1 | G | COG0800                         | 2-keto-3-deoxy-6-phosphogluconate aldolase                                                                                                                                                                                                                    |
| TS28Clo04898 CDS CDS             | 7.0   | 1.0  | 23.1 | G | COG0574                         | Phosphoenolpyruvate synthase/pyruvate phosphate dikinase                                                                                                                                                                                                      |
| TS29Fae08749 CDS CDS             | 3.5   | 0.5  | 23.1 | G | COG0406                         | Fructose-2,6-bisphosphatase                                                                                                                                                                                                                                   |
| Ehal1651 CDS CDS                 | 3.5   | 0.5  | 23.1 | G | COG0297                         | Glycogen synthase                                                                                                                                                                                                                                             |
| ShigspD90640 CDS CDS             | 7.0   | 1.0  | 23.1 | G | COG0058                         | Glucan phosphorylase                                                                                                                                                                                                                                          |
| Hfil0155 CDS CDS                 | 6.7   | 1.0  | 22.0 | G | COG0057                         | Glyceraldehyde-3-phosphate dehydrogenase/erythrose-4-phosphate dehydrogenase                                                                                                                                                                                  |
| BactD23513 CDS CDS               | 6.5   | 1.0  | 21.5 | G | COG3525                         | N-acetyl-beta-hexosaminidase                                                                                                                                                                                                                                  |
| Bste0424 CDS CDS                 | 13.0  | 2.0  | 21.5 | G | COG2407                         | L-fucose isomerase and related proteins                                                                                                                                                                                                                       |
| Bdor3986 CDS CDS                 | 31.7  | 5.0  | 20.9 | G | COG0297                         | Glycogen synthase                                                                                                                                                                                                                                             |
| Bste1250 CDS CDS                 | 18.8  | 3.0  | 20.8 | G | COG0588                         | Phosphoglycerate mutase 1                                                                                                                                                                                                                                     |
| Rtor0339 CDS CDS                 | 12.5  | 2.0  | 20.7 | G | COG0395 COG3833                 | ABC-type sugar transport system, permease component ABC-type maltose transport systems, permease component                                                                                                                                                    |
| CspM6211083 CDS CDS              | 15.4  | 2.5  | 20.4 | G | COG0057                         | Glyceraldehyde-3-phosphate dehydrogenase/erythrose-4-phosphate dehydrogenase                                                                                                                                                                                  |
| Pmer3326 CDS CDS                 | 24.5  | 4.0  | 20.3 | G | COG0363                         | 6-phosphogluconolactonase/Glucosamine-6-phosphate isomerase/deaminase                                                                                                                                                                                         |
| Csei2431 CDS CDS                 | 6.0   | 1.0  | 19.8 | G | COG2407                         | L-fucose isomerase and related proteins                                                                                                                                                                                                                       |
| Hfil1237 CDS CDS                 | 6.0   | 1.0  | 19.8 | G | COG1820                         | N-acetylglucosamine-6-phosphate deacetylase                                                                                                                                                                                                                   |
| TS29Rum17478 CDS CDS             | 6.0   | 1.0  | 19.8 | G | COG1653                         | ABC-type sugar transport system, periplasmic component                                                                                                                                                                                                        |
| Bova3871 CDS CDS                 | 3.0   | 0.5  | 19.8 | G | COG0297                         | Glycogen synthase                                                                                                                                                                                                                                             |
| Aput1142 CDS CDS                 | 6.0   | 1.0  | 19.8 | G | COG0057                         | Glyceraldehyde-3-phosphate dehydrogenase/erythrose-4-phosphate dehydrogenase                                                                                                                                                                                  |
| Sinf0639 CDS CDS                 | 6.0   | 1.0  | 19.8 | G | COG0057                         | Glyceraldehyde-3-phosphate dehydrogenase/erythrose-4-phosphate dehydrogenase                                                                                                                                                                                  |
| TS28Rum08489 CDS CDS             | 45.0  | 7.7  | 19.4 | G | COG1653                         | ABC-type sugar transport system, periplasmic component                                                                                                                                                                                                        |
| Clep1000 CDS CDS                 | 34.7  | 6.0  | 19.1 | G | COG0395 COG3833                 | ABC-type sugar transport system, permease component ABC-type maltose transport systems, permease component                                                                                                                                                    |
| TS29Bac01188 CDS CDS             | 17.0  | 3.0  | 18.7 | G | COG4632                         | Exopolysaccharide biosynthesis protein related to N-acetylglucosamine-1-phosphodiester alpha-N-acetylglucosaminidase                                                                                                                                          |

|                                 |      |      |      |   |                                         |                                                                                                                                                                                                                                                                                           |
|---------------------------------|------|------|------|---|-----------------------------------------|-------------------------------------------------------------------------------------------------------------------------------------------------------------------------------------------------------------------------------------------------------------------------------------------|
| Even1637 CDS CDS                | 8.3  | 1.5  | 18.4 | G | COG0057                                 | Glyceraldehyde-3-phosphate dehydrogenase/erythrose-4-phosphate dehydrogenase                                                                                                                                                                                                              |
| Bxvl2682 CDS CDS                | 8.3  | 1.5  | 18.2 | G | COG3507                                 | Beta-xylosidase                                                                                                                                                                                                                                                                           |
| Rbro909 CDS CDS                 | 5.5  | 1.0  | 18.2 | G | COG0296                                 | 1,4-alpha-glucan branching enzyme                                                                                                                                                                                                                                                         |
| TS29Rum17483 CDS CDS            | 33.0 | 6.0  | 18.2 | G | COG0191                                 | Fructose/tagatose biphosphate aldolase                                                                                                                                                                                                                                                    |
| Bova1771 CDS CDS                | 2.7  | 0.5  | 17.9 | G | COG1820                                 | N-acetylglucosamine-6-phosphate deacetylase                                                                                                                                                                                                                                               |
| Rtor1578 CDS CDS                | 21.5 | 4.0  | 17.8 | G | COG3716                                 | Phosphotransferase system, mannose/fructose/N-acetylglucosamine-specific component IID                                                                                                                                                                                                    |
| Bxvl0567 CDS CDS                | 2.7  | 0.5  | 17.6 | G | COG3537                                 | Putative alpha-1,2-mannosidase                                                                                                                                                                                                                                                            |
| BactD13483 CDS CDS              | 2.7  | 0.5  | 17.6 | G | COG3537                                 | Putative alpha-1,2-mannosidase                                                                                                                                                                                                                                                            |
| FpraM2120367 CDS CDS            | 8.0  | 1.5  | 17.6 | G | COG0205                                 | 6-phosphofructokinase                                                                                                                                                                                                                                                                     |
| BactD12576 CDS CDS              | 5.3  | 1.0  | 17.4 | G | COG3507                                 | Beta-xylosidase                                                                                                                                                                                                                                                                           |
| Cmet0760 CDS CDS                | 15.7 | 3.0  | 17.3 | G | COG0057                                 | Glyceraldehyde-3-phosphate dehydrogenase/erythrose-4-phosphate dehydrogenase                                                                                                                                                                                                              |
| Rbro0630 CDS CDS                | 43.5 | 8.5  | 16.9 | G | COG2182                                 | Maltose-binding periplasmic proteins/domains                                                                                                                                                                                                                                              |
| FpraM2120350 CDS CDS            | 12.7 | 2.5  | 16.8 | G | COG1175 COG4209                         | ABC-type sugar transport systems, permease components ABC-type polysaccharide transport system, permease component                                                                                                                                                                        |
| Eha11451 CDS CDS                | 20.3 | 4.0  | 16.7 | G | COG1879                                 | ABC-type sugar transport system, periplasmic component                                                                                                                                                                                                                                    |
| Bdor0615 CDS CDS                | 80.7 | 16.0 | 16.7 | G | COG0363                                 | 6-phosphogluconolactonase/Glucosamine-6-phosphate isomerase/deaminase                                                                                                                                                                                                                     |
| Bdor3919 CDS CDS                | 40.2 | 8.0  | 16.6 | G | COG3408                                 | Glycogen debranching enzyme                                                                                                                                                                                                                                                               |
| TS28Par1526 CDS CDS             | 2.5  | 0.5  | 16.5 | G | COG4409                                 | Neuraminidase (sialidase)                                                                                                                                                                                                                                                                 |
| CspSS21430 CDS CDS              | 10.0 | 2.0  | 16.5 | G | COG3775                                 | Phosphotransferase system, galactitol-specific IIC component                                                                                                                                                                                                                              |
| Bdor2375 CDS CDS                | 15.0 | 3.0  | 16.5 | G | COG2731                                 | Beta-galactosidase, beta subunit                                                                                                                                                                                                                                                          |
| TS29RumUnc0460 CDS CDS          | 5.0  | 1.0  | 16.5 | G | COG1175                                 | ABC-type sugar transport systems, permease components                                                                                                                                                                                                                                     |
| TS29Bac03753 CDS CDS            | 2.5  | 0.5  | 16.5 | G | COG0580                                 | Glycerol uptake facilitator and related permeases (Major Intrinsic Protein Family)                                                                                                                                                                                                        |
| Cmit0823 CDS CDS                | 5.0  | 1.0  | 16.5 | G | COG0574 COG1080 COG4668 COG3412 COG2190 | Phosphoenolpyruvate synthase/pyruvate phosphate dikinase Phosphoenolpyruvate-protein kinase (PTS system EI component in bacteria) Mannitol/fructose-specific phosphotransferase system, IIA domain Uncharacterized protein conserved in bacteria Phosphotransferase system IIA components |
| ShigspD90553 CDS CDS            | 5.0  | 1.0  | 16.5 | G | COG0383                                 | Alpha-mannosidase                                                                                                                                                                                                                                                                         |
| TS29Rum12314 CDS CDS            | 1.7  | 0.3  | 16.5 | G | COG0363                                 | 6-phosphogluconolactonase/Glucosamine-6-phosphate isomerase/deaminase                                                                                                                                                                                                                     |
| TS28EntUnc146 CDS CDS           | 10.0 | 2.0  | 16.5 | G | COG0205                                 | 6-phosphofructokinase                                                                                                                                                                                                                                                                     |
| Ccom0805 CDS CDS                | 5.0  | 1.0  | 16.5 | G | COG0205                                 | 6-phosphofructokinase                                                                                                                                                                                                                                                                     |
| Pmer3227 CDS CDS                | 10.0 | 2.0  | 16.5 | G | COG0191                                 | Fructose/tagatose biphosphate aldolase                                                                                                                                                                                                                                                    |
| Bfin0903 CDS CDS                | 2.4  | 0.5  | 16.1 | G | COG1830                                 | DhnA-type fructose-1,6-bisphosphate aldolase and related enzymes                                                                                                                                                                                                                          |
| Bthe3732371 CDS CDS             | 2.4  | 0.5  | 16.1 | G | COG1830                                 | DhnA-type fructose-1,6-bisphosphate aldolase and related enzymes                                                                                                                                                                                                                          |
| BactD12630 CDS CDS              | 2.4  | 0.5  | 16.1 | G | COG1830                                 | DhnA-type fructose-1,6-bisphosphate aldolase and related enzymes                                                                                                                                                                                                                          |
| Bthe7331681 CDS CDS             | 2.4  | 0.5  | 16.1 | G | COG1830                                 | DhnA-type fructose-1,6-bisphosphate aldolase and related enzymes                                                                                                                                                                                                                          |
| Bthe3730341 CDS CDS             | 1.2  | 0.3  | 16.0 | G | COG0057                                 | Glyceraldehyde-3-phosphate dehydrogenase/erythrose-4-phosphate dehydrogenase                                                                                                                                                                                                              |
| Bthe7332104 CDS CDS             | 1.2  | 0.3  | 16.0 | G | COG0057                                 | Glyceraldehyde-3-phosphate dehydrogenase/erythrose-4-phosphate dehydrogenase                                                                                                                                                                                                              |
| Rgna0763 CDS CDS                | 29.0 | 6.0  | 16.0 | G | COG1070                                 | Sugar (pentulose and hexulose) kinases                                                                                                                                                                                                                                                    |
| TS28Rum08487 CDS CDS            | 9.5  | 2.0  | 15.7 | G | COG0395 COG3833                         | ABC-type sugar transport system, permease component ABC-type maltose transport systems, permease component                                                                                                                                                                                |
| TS28Eub0689 CDS CDS             | 73.0 | 15.5 | 15.6 | G | COG0296                                 | 1,4-alpha-glucan branching enzyme                                                                                                                                                                                                                                                         |
| Cbol1156 CDS CDS                | 7.0  | 1.5  | 15.4 | G | COG1129                                 | ABC-type sugar transport system, ATPase component                                                                                                                                                                                                                                         |
| RintL10955 CDS CDS              | 14.0 | 3.0  | 15.4 | G | COG0448                                 | ADP-glucose pyrophosphorylase                                                                                                                                                                                                                                                             |
| STER1366 CDS beta-galactosidase | 2.3  | 0.5  | 15.4 | G | COG3250                                 | Beta-galactosidase/beta-glucuronidase                                                                                                                                                                                                                                                     |
| str1397 CDS beta-galactosidase  | 2.3  | 0.5  | 15.4 | G | COG3250                                 | Beta-galactosidase/beta-glucuronidase                                                                                                                                                                                                                                                     |
| TS29Fae01620 CDS CDS            | 6.9  | 1.5  | 15.2 | G | COG1653                                 | ABC-type sugar transport system, periplasmic component                                                                                                                                                                                                                                    |
| TS28RumUnc0992 CDS CDS          | 23.0 | 5.0  | 15.2 | G | COG2152                                 | Predicted glycosylase                                                                                                                                                                                                                                                                     |
| TS29Rum10837 CDS CDS            | 59.0 | 13.0 | 15.0 | G | COG1653                                 | ABC-type sugar transport system, periplasmic component                                                                                                                                                                                                                                    |
| Bdor0616 CDS CDS                | 19.7 | 4.3  | 15.0 | G | COG0363                                 | 6-phosphogluconolactonase/Glucosamine-6-phosphate isomerase/deaminase                                                                                                                                                                                                                     |
| Bste1086 CDS CDS                | 45.3 | 10.0 | 15.0 | G | COG0296                                 | 1,4-alpha-glucan branching enzyme                                                                                                                                                                                                                                                         |
| ShigspD90233 CDS CDS            | 4.5  | 1.0  | 14.9 | G | COG1879 COG1129                         | ABC-type sugar transport system, periplasmic component ABC-type sugar transport system, ATPase component                                                                                                                                                                                  |
| Msmi750304 CDS CDS              | 6.7  | 1.5  | 14.9 | G | COG1830                                 | DhnA-type fructose-1,6-bisphosphate aldolase and related enzymes                                                                                                                                                                                                                          |
| FpraM2120140 CDS CDS            | 3.0  | 0.7  | 14.9 | G | COG0297                                 | Glycogen synthase                                                                                                                                                                                                                                                                         |
| TS28Clo04564 CDS CDS            | 9.0  | 2.0  | 14.9 | G | COG0296                                 | 1,4-alpha-glucan branching enzyme                                                                                                                                                                                                                                                         |
| Clep0321 CDS CDS                | 6.7  | 1.5  | 14.7 | G | COG0057                                 | Glyceraldehyde-3-phosphate dehydrogenase/erythrose-4-phosphate dehydrogenase                                                                                                                                                                                                              |
| TS29Fae05698 CDS CDS            | 2.9  | 0.7  | 14.6 | G | COG1653                                 | ABC-type sugar transport system, periplasmic component                                                                                                                                                                                                                                    |
| Pmer3620 CDS CDS                | 2.5  | 0.6  | 14.4 | G | COG0588                                 | Phosphoglycerate mutase 1                                                                                                                                                                                                                                                                 |
| Bdor3664 CDS CDS                | 2.5  | 0.6  | 14.4 | G | COG0588                                 | Phosphoglycerate mutase 1                                                                                                                                                                                                                                                                 |
| TS28Rum12793 CDS CDS            | 4.3  | 1.0  | 14.3 | G | COG0524                                 | Sugar kinases, ribokinase family                                                                                                                                                                                                                                                          |
| TS29Bac08446 CDS CDS            | 6.5  | 1.5  | 14.3 | G | COG0364                                 | Glucose-6-phosphate 1-dehydrogenase                                                                                                                                                                                                                                                       |
| FpraM2121137 CDS CDS            | 4.3  | 1.0  | 14.3 | G | COG3250                                 | Beta-galactosidase/beta-glucuronidase                                                                                                                                                                                                                                                     |
| Cspi1588 CDS CDS                | 4.3  | 1.0  | 14.3 | G | COG1501 COG4724                         | Alpha-glucosidases, family 31 of glycosyl hydrolases Endo-beta-N-acetylglucosaminidase D                                                                                                                                                                                                  |
| Msmi750975 CDS CDS              | 2.9  | 0.7  | 14.3 | G | COG0580                                 | Glycerol uptake facilitator and related permeases (Major Intrinsic Protein Family)                                                                                                                                                                                                        |
| TS29Fae05950 CDS CDS            | 8.5  | 2.0  | 14.1 | G | COG2017                                 | Galactose mutarotase and related enzymes                                                                                                                                                                                                                                                  |
| TS29Fae04148 CDS CDS            | 6.3  | 1.5  | 14.0 | G | COG3250                                 | Beta-galactosidase/beta-glucuronidase                                                                                                                                                                                                                                                     |
| BactD13152 CDS CDS              | 21.0 | 5.0  | 13.9 | G | COG2160                                 | L-arabinose isomerase                                                                                                                                                                                                                                                                     |
| Rgna1672 CDS CDS                | 4.2  | 1.0  | 13.9 | G | COG0149                                 | Triosephosphate isomerase                                                                                                                                                                                                                                                                 |
| Bdor1042 CDS CDS                | 69.5 | 17.0 | 13.5 | G | COG3250                                 | Beta-galactosidase/beta-glucuronidase                                                                                                                                                                                                                                                     |
| Bdor3247 CDS CDS                | 24.2 | 6.0  | 13.3 | G | COG0153                                 | Galactokinase                                                                                                                                                                                                                                                                             |
| Rtor1813 CDS CDS                | 4.0  | 1.0  | 13.2 | G | COG4668 COG1925                         | Mannitol/fructose-specific phosphotransferase system, IIA domain Phosphotransferase system, HPr-related proteins                                                                                                                                                                          |
| TS29Bac08546 CDS CDS            | 8.0  | 2.0  | 13.2 | G | COG3525                                 | N-acetyl-beta-hexosaminidase                                                                                                                                                                                                                                                              |

|                                  |      |       |      |   |                                 |                                                                                                                                                                                                                                                  |
|----------------------------------|------|-------|------|---|---------------------------------|--------------------------------------------------------------------------------------------------------------------------------------------------------------------------------------------------------------------------------------------------|
| BactD11424 CDS CDS               | 2.0  | 0.5   | 13.2 | G | COG3507                         | Beta-xylosidase                                                                                                                                                                                                                                  |
| Rtor1576 CDS CDS                 | 26.0 | 6.5   | 13.2 | G | COG3444                         | Phosphotransferase system, mannose/fructose/N-acetylglucosamine-specific component IIB                                                                                                                                                           |
| ShigspD91590 CDS CDS             | 4.0  | 1.0   | 13.2 | G | COG3010                         | Putative N-acetylmannosamine-6-phosphate epimerase                                                                                                                                                                                               |
| TS28Rum02188 CDS CDS             | 2.0  | 0.5   | 13.2 | G | COG2893                         | Phosphotransferase system, mannose/fructose-specific component IIA                                                                                                                                                                               |
| Pmer1552 CDS CDS                 | 4.0  | 1.0   | 13.2 | G | COG2731                         | Beta-galactosidase, beta subunit                                                                                                                                                                                                                 |
| BactD12493 CDS CDS               | 2.0  | 0.5   | 13.2 | G | COG2730                         | Endoglucanase                                                                                                                                                                                                                                    |
| TS29Bac11104 CDS CDS             | 4.0  | 1.0   | 13.2 | G | COG2271                         | Sugar phosphate permease                                                                                                                                                                                                                         |
| BactD23255 CDS CDS               | 4.0  | 1.0   | 13.2 | G | COG2152                         | Predicted glycosylase                                                                                                                                                                                                                            |
| Casp2745 CDS CDS                 | 4.0  | 1.0   | 13.2 | G | COG1879                         | ABC-type sugar transport system, periplasmic component                                                                                                                                                                                           |
| TS29Rum08551 CDS CDS             | 2.0  | 0.5   | 13.2 | G | COG1653                         | ABC-type sugar transport system, periplasmic component                                                                                                                                                                                           |
| Rgna1196 CDS CDS                 | 2.0  | 0.5   | 13.2 | G | COG1653                         | ABC-type sugar transport system, periplasmic component                                                                                                                                                                                           |
| TS29Rum11964 CDS CDS             | 2.0  | 0.5   | 13.2 | G | COG1653                         | ABC-type sugar transport system, periplasmic component                                                                                                                                                                                           |
| RintL1091 CDS CDS                | 4.0  | 1.0   | 13.2 | G | COG1653                         | ABC-type sugar transport system, periplasmic component                                                                                                                                                                                           |
| TS29Bac11287 CDS CDS             | 4.0  | 1.0   | 13.2 | G | COG1472                         | Beta-glucosidase-related glycosidases                                                                                                                                                                                                            |
| Bste3064 CDS CDS                 | 4.0  | 1.0   | 13.2 | G | COG1109                         | Phosphomannomutase                                                                                                                                                                                                                               |
| TS29Rum02613 CDS CDS             | 8.0  | 2.0   | 13.2 | G | COG0448                         | ADP-glucose pyrophosphorylase                                                                                                                                                                                                                    |
| Ccom0832 CDS CDS                 | 4.0  | 1.0   | 13.2 | G | COG0448                         | ADP-glucose pyrophosphorylase                                                                                                                                                                                                                    |
| TS28Dor0774 CDS CDS              | 4.0  | 1.0   | 13.2 | G | COG0395                         | ABC-type sugar transport system, permease component                                                                                                                                                                                              |
| Robe0171 CDS CDS                 | 2.0  | 0.5   | 13.2 | G | COG0296                         | 1,4-alpha-glucan branching enzyme                                                                                                                                                                                                                |
| TS29Bac08270 CDS CDS             | 2.0  | 0.5   | 13.2 | G | COG0205                         | 6-phosphofructokinase                                                                                                                                                                                                                            |
| Ehal1631 CDS CDS                 | 4.0  | 1.0   | 13.2 | G | COG0191                         | Fructose/tagatose biphosphate aldolase                                                                                                                                                                                                           |
| Dlon0373 CDS CDS                 | 4.0  | 1.0   | 13.2 | G | COG0126 COG0149                 | 3-phosphoglycerate kinase Triosephosphate isomerase                                                                                                                                                                                              |
| Csci2583 CDS CDS                 | 4.0  | 1.0   | 13.2 | G | COG0058                         | Glucan phosphorylase                                                                                                                                                                                                                             |
| Cbol4778 CDS CDS                 | 4.0  | 1.0   | 13.2 | G | COG0057                         | Glyceraldehyde-3-phosphate dehydrogenase/erythrose-4-phosphate dehydrogenase                                                                                                                                                                     |
| Rbro0910 CDS CDS                 | 27.3 | 7.0   | 12.9 | G | COG0057                         | Glyceraldehyde-3-phosphate dehydrogenase/erythrose-4-phosphate dehydrogenase                                                                                                                                                                     |
| Msmi750809 CDS CDS               | 2.2  | 0.6   | 12.7 | G | COG0149                         | Triosephosphate isomerase                                                                                                                                                                                                                        |
| TS29Rum06752 CDS CDS             | 2.5  | 0.7   | 12.4 | G | COG2190 COG1264                 | Phosphotransferase system IIA components Phosphotransferase system IIB components                                                                                                                                                                |
| Bdor0266 CDS CDS                 | 25.7 | 7.0   | 12.1 | G | COG0191                         | Fructose/tagatose biphosphate aldolase                                                                                                                                                                                                           |
| Bste2964 CDS CDS                 | 20.0 | 5.5   | 12.0 | G | COG3537                         | Putative alpha-1,2-mannosidase                                                                                                                                                                                                                   |
| CspSS22702 CDS CDS               | 18.0 | 5.0   | 11.9 | G | COG2893 COG3444                 | Phosphotransferase system, mannose/fructose-specific component IIA Phosphotransferase system, mannose/fructose/N-acetylglucosamine-specific component IIB                                                                                        |
| Dfor2762 CDS CDS                 | 21.5 | 6.0   | 11.8 | G | COG0448                         | ADP-glucose pyrophosphorylase                                                                                                                                                                                                                    |
| Cspi0227 CDS CDS                 | 10.7 | 3.0   | 11.8 | G | COG3250 COG1501 COG3525         | Beta-galactosidase/beta-glucuronidase Alpha-glucosidases, family 31 of glycosyl hydrolases N-acetyl-beta-hexosaminidase                                                                                                                          |
| TS28Par2005 CDS CDS              | 7.0  | 2.0   | 11.6 | G | COG3525                         | N-acetyl-beta-hexosaminidase                                                                                                                                                                                                                     |
| TS28Bac1548 CDS CDS              | 11.7 | 3.3   | 11.6 | G | COG3459                         | Cellobiose phosphorylase                                                                                                                                                                                                                         |
| TS29Rum18173 CDS CDS             | 14.0 | 4.0   | 11.6 | G | COG2407                         | L-fucose isomerase and related proteins                                                                                                                                                                                                          |
| Ehal0447 CDS CDS                 | 3.5  | 1.0   | 11.6 | G | COG2376                         | Dihydroxyacetone kinase                                                                                                                                                                                                                          |
| TS29Eub1129 CDS CDS              | 2.3  | 0.7   | 11.6 | G | COG1653                         | ABC-type sugar transport system, periplasmic component                                                                                                                                                                                           |
| TS28Rum13175 CDS CDS             | 14.0 | 4.0   | 11.6 | G | COG1472                         | Beta-glucosidase-related glycosidases                                                                                                                                                                                                            |
| BactD12739 CDS CDS               | 7.0  | 2.0   | 11.6 | G | COG0297                         | Glycogen synthase                                                                                                                                                                                                                                |
| Pmer0815 CDS CDS                 | 7.0  | 2.0   | 11.6 | G | COG0297                         | Glycogen synthase                                                                                                                                                                                                                                |
| BactD10952 CDS CDS               | 1.8  | 0.5   | 11.6 | G | COG0191                         | Fructose/tagatose biphosphate aldolase                                                                                                                                                                                                           |
| Hfil1390 CDS CDS                 | 3.5  | 1.0   | 11.6 | G | COG0176 COG0166                 | Transaldolase Glucose-6-phosphate isomerase                                                                                                                                                                                                      |
| TS28Dor0107 CDS CDS              | 73.0 | 21.0  | 11.5 | G | COG1653                         | ABC-type sugar transport system, periplasmic component                                                                                                                                                                                           |
| BactD13148 CDS CDS               | 6.3  | 1.8   | 11.4 | G | COG0021                         | Transketolase                                                                                                                                                                                                                                    |
| Bdor0591 CDS CDS                 | 30.3 | 9.0   | 11.1 | G | COG3525                         | N-acetyl-beta-hexosaminidase                                                                                                                                                                                                                     |
| TS28Bac7962 CDS CDS              | 57.2 | 17.0  | 11.1 | G | COG0297                         | Glycogen synthase                                                                                                                                                                                                                                |
| Rtor2421 CDS CDS                 | 15.0 | 4.5   | 11.0 | G | COG5263 COG4193                 | FOG: Glucan-binding domain (YG repeat) Beta- N-acetylglucosaminidase                                                                                                                                                                             |
| Acol0978 CDS CDS                 | 5.0  | 1.5   | 11.0 | G | COG1129                         | ABC-type sugar transport system, ATPase component                                                                                                                                                                                                |
| RintL10388 CDS CDS               | 6.5  | 2.0   | 10.7 | G | COG1653                         | ABC-type sugar transport system, periplasmic component                                                                                                                                                                                           |
| Csym1961 CDS CDS                 | 13.0 | 4.0   | 10.7 | G | COG0574 COG1080 COG4668 COG3412 | Phosphoenolpyruvate synthase/pyruvate phosphate dikinase Phosphoenolpyruvate-protein kinase (PTS system EI component in bacteria) Mannitol/fructose-specific phosphotransferase system, IIA domain Uncharacterized protein conserved in bacteria |
| Pmer1909 CDS CDS                 | 32.0 | 10.0  | 10.6 | G | COG0021                         | Transketolase                                                                                                                                                                                                                                    |
| Svar1735 CDS CDS                 | 48.8 | 15.3  | 10.5 | G | COG0057                         | Glyceraldehyde-3-phosphate dehydrogenase/erythrose-4-phosphate dehydrogenase                                                                                                                                                                     |
| Bste0539 CDS CDS                 | 19.0 | 6.0   | 10.5 | G | COG1109                         | Phosphomannomutase                                                                                                                                                                                                                               |
| TS28Rum04748 CDS CDS             | 17.0 | 5.5   | 10.2 | G | COG1879                         | ABC-type sugar transport system, periplasmic component                                                                                                                                                                                           |
| Bpse1035 CDS CDS                 | 1.8  | 58.0  | 0.1  | G | COG1501                         | Alpha-glucosidases, family 31 of glycosyl hydrolases                                                                                                                                                                                             |
| TS29Bif2248 CDS CDS              | 0.3  | 8.3   | 0.1  | G | COG0057                         | Glyceraldehyde-3-phosphate dehydrogenase/erythrose-4-phosphate dehydrogenase                                                                                                                                                                     |
| TS28Fae00649 CDS CDS             | 1.0  | 33.3  | 0.1  | G | COG1175                         | ABC-type sugar transport systems, permease components                                                                                                                                                                                            |
| TS29Rum20811 CDS CDS             | 1.0  | 34.0  | 0.1  | G | COG3534                         | Alpha-L-arabinofuranosidase                                                                                                                                                                                                                      |
| Bdor1382 CDS CDS                 | 1.0  | 34.0  | 0.1  | G | COG2017                         | Galactose mutarotase and related enzymes                                                                                                                                                                                                         |
| Rbro0327 CDS CDS                 | 0.3  | 11.3  | 0.1  | G | COG0366 COG1523                 | Glycosidases Type II secretory pathway, pullulanase PulA and related glycosidases                                                                                                                                                                |
| EUBREC0500 CDS alpha-glucosidase | 3.0  | 103.5 | 0.1  | G | COG1501                         | Alpha-glucosidases, family 31 of glycosyl hydrolases                                                                                                                                                                                             |
| TS28Rum11134 CDS CDS             | 0.5  | 17.3  | 0.1  | G | COG0205                         | 6-phosphofructokinase                                                                                                                                                                                                                            |
| Rtor0320 CDS CDS                 | 0.3  | 11.7  | 0.1  | G | COG0058                         | Glucan phosphorylase                                                                                                                                                                                                                             |
| TS28Rum02648 CDS CDS             | 0.3  | 11.7  | 0.1  | G | COG0058                         | Glucan phosphorylase                                                                                                                                                                                                                             |
| TS28Eub0515 CDS CDS              | 2.0  | 71.5  | 0.1  | G | COG0448                         | ADP-glucose pyrophosphorylase                                                                                                                                                                                                                    |
| TS28Bif0083 CDS CDS              | 1.3  | 47.8  | 0.1  | G | COG2211                         | Na <sup>+</sup> /melibiose symporter and related transporters                                                                                                                                                                                    |
| TS28Eub8022 CDS CDS              | 2.0  | 72.0  | 0.1  | G | COG1653                         | ABC-type sugar transport system, periplasmic component                                                                                                                                                                                           |
| TS28Bac7725 CDS CDS              | 1.0  | 36.0  | 0.1  | G | COG0366 COG1523                 | Glycosidases Type II secretory pathway, pullulanase PulA and related glycosidases                                                                                                                                                                |
| TS28Bac1179 CDS CDS              | 0.3  | 12.0  | 0.1  | G | COG3635                         | Predicted phosphoglycerate mutase, AP superfamily                                                                                                                                                                                                |
| TS28Bif3556 CDS CDS              | 2.6  | 94.0  | 0.1  | G | COG0058                         | Glucan phosphorylase                                                                                                                                                                                                                             |
| TS28Eub1225 CDS CDS              | 1.5  | 55.0  | 0.1  | G | COG0297                         | Glycogen synthase                                                                                                                                                                                                                                |
| TS28Fae00258 CDS CDS             | 1.0  | 37.0  | 0.1  | G | COG2190 COG1264 COG1263         | Phosphotransferase system IIA components Phosphotransferase system IIB components Phosphotransferase system IIC components, glucose/maltose/N-acetylglucosamine-specific                                                                         |
| TS28Eub7636 CDS CDS              | 1.0  | 37.0  | 0.1  | G | COG0395                         | ABC-type sugar transport system, permease component                                                                                                                                                                                              |

|                                         |     |       |     |   |                                 |                                                                                                                                                                                   |
|-----------------------------------------|-----|-------|-----|---|---------------------------------|-----------------------------------------------------------------------------------------------------------------------------------------------------------------------------------|
| TS28Eub5173 CDS CDS                     | 2.0 | 74.0  | 0.1 | G | COG0366 COG3281                 | Glycosidases Uncharacterized protein, probably involved in trehalose biosynthesis                                                                                                 |
| TS28Fae05601 CDS CDS                    | 1.0 | 37.0  | 0.1 | G | COG0366 COG1523 COG3281 COG1640 | Glycosidases Type II secretory pathway, pullulanase PulA and related glycosidases Uncharacterized protein, probably involved in trehalose biosynthesis 4-alpha-glucanotransferase |
| TS28Eub6115 CDS CDS                     | 0.5 | 18.5  | 0.1 | G | COG0296                         | 1,4-alpha-glucan branching enzyme                                                                                                                                                 |
| Ehal1866 CDS CDS                        | 0.5 | 18.5  | 0.1 | G | COG0296                         | 1,4-alpha-glucan branching enzyme                                                                                                                                                 |
| TS28Rum16058 CDS CDS                    | 2.0 | 75.0  | 0.1 | G | COG3250                         | Beta-galactosidase/beta-glucuronidase                                                                                                                                             |
| TS28Rum13932 CDS CDS                    | 0.5 | 19.0  | 0.1 | G | COG1129 COG3845                 | ABC-type sugar transport system, ATPase component ABC-type uncharacterized transport systems, ATPase components                                                                   |
| TS29Rum13502 CDS CDS                    | 1.0 | 38.0  | 0.1 | G | COG0366 COG3281                 | Glycosidases Uncharacterized protein, probably involved in trehalose biosynthesis                                                                                                 |
| EUBREC2816 CDS cellobiose-phosphorylase | 4.0 | 153.0 | 0.1 | G | COG3459                         | Cellobiose phosphorylase                                                                                                                                                          |
| TS28Rum11780 CDS CDS                    | 0.5 | 19.2  | 0.1 | G | COG1874                         | Beta-galactosidase                                                                                                                                                                |
| Bnse1278 CDS CDS                        | 1.0 | 39.3  | 0.1 | G | COG1653                         | ABC-type sugar transport system, periplasmic component                                                                                                                            |
| TS28Eub0693 CDS CDS                     | 1.5 | 60.0  | 0.1 | G | COG1638                         | TRAP-type C4-dicarboxylate transport system, periplasmic component                                                                                                                |
| TS28Rum09583 CDS CDS                    | 1.0 | 40.0  | 0.1 | G | COG1593 COG4666                 | TRAP-type C4-dicarboxylate transport system, large permease component TRAP-type uncharacterized transport system, fused permease components                                       |
| TS29Rum16554 CDS CDS                    | 1.0 | 40.0  | 0.1 | G | COG1175                         | ABC-type sugar transport systems, permease components                                                                                                                             |
| TS28Rum05120 CDS CDS                    | 0.2 | 8.0   | 0.1 | G | COG1129                         | ABC-type sugar transport system, ATPase component                                                                                                                                 |
| RintL12748 CDS CDS                      | 0.8 | 30.2  | 0.1 | G | COG3250                         | Beta-galactosidase/beta-glucuronidase                                                                                                                                             |
| TS28Clo0906 CDS CDS                     | 9.0 | 363.0 | 0.1 | G | COG3957                         | Phosphotetrolase                                                                                                                                                                  |
| TS28Fae20065 CDS CDS                    | 0.7 | 27.5  | 0.1 | G | COG0395 COG3833                 | ABC-type sugar transport system, permease component ABC-type maltose transport systems, permease component                                                                        |
| FpraM2120647 CDS CDS                    | 0.5 | 21.0  | 0.1 | G | COG3250                         | Beta-galactosidase/beta-glucuronidase                                                                                                                                             |
| TS28Rum14204 CDS CDS                    | 0.5 | 21.0  | 0.1 | G | COG1879 COG4213                 | ABC-type sugar transport system, periplasmic component ABC-type xylose transport system, periplasmic component                                                                    |
| TS28Eub7588 CDS CDS                     | 1.0 | 42.0  | 0.1 | G | COG0021 COG3959                 | Transketolase Transketolase, N-terminal subunit                                                                                                                                   |
| TS28Eub8795 CDS CDS                     | 3.0 | 126.5 | 0.1 | G | COG0058                         | Glucan phosphorylase                                                                                                                                                              |
| TS28Clo01420 CDS CDS                    | 5.0 | 212.0 | 0.1 | G | COG0696                         | Phosphoglyceromutase                                                                                                                                                              |
| TS28Rum02687 CDS CDS                    | 0.8 | 34.0  | 0.1 | G | COG3459                         | Cellobiose phosphorylase                                                                                                                                                          |
| TS28Rum14378 CDS CDS                    | 0.5 | 21.5  | 0.1 | G | COG2301                         | Citrate lyase beta subunit                                                                                                                                                        |
| TS28Eub6169 CDS CDS                     | 2.5 | 108.5 | 0.1 | G | COG3250                         | Beta-galactosidase/beta-glucuronidase                                                                                                                                             |
| TS28Rum00971 CDS CDS                    | 2.0 | 87.0  | 0.1 | G | COG1501                         | Alpha-glucosidases, family 31 of glycosyl hydrolases                                                                                                                              |
| Buni0566 CDS CDS                        | 0.3 | 14.5  | 0.1 | G | COG0296                         | 1,4-alpha-glucan branching enzyme                                                                                                                                                 |
| TS29Fae01009 CDS CDS                    | 0.5 | 22.0  | 0.1 | G | COG3345                         | Alpha-galactosidase                                                                                                                                                               |
| TS28Fae13899 CDS CDS                    | 0.5 | 22.0  | 0.1 | G | COG1129 COG3845                 | ABC-type sugar transport system, ATPase component ABC-type uncharacterized transport systems, ATPase components                                                                   |
| TS28Rum00924 CDS CDS                    | 0.5 | 22.0  | 0.1 | G | COG0448                         | ADP-glucose pyrophosphorylase                                                                                                                                                     |
| TS28Fae18822 CDS CDS                    | 1.0 | 44.5  | 0.1 | G | COG0058                         | Glucan phosphorylase                                                                                                                                                              |
| TS28Fae21235 CDS CDS                    | 2.0 | 89.5  | 0.1 | G | COG2211                         | Na <sup>+</sup> /melibiose symporter and related transporters                                                                                                                     |
| TS28Fae21294 CDS CDS                    | 1.0 | 45.0  | 0.1 | G | COG0063 COG0062                 | Predicted sugar kinase Uncharacterized conserved protein                                                                                                                          |
| TS28Bif1744 CDS CDS                     | 1.7 | 75.5  | 0.1 | G | COG0366                         | Glycosidases                                                                                                                                                                      |
| TS28Eub7889 CDS CDS                     | 2.5 | 114.0 | 0.1 | G | COG0366                         | Glycosidases                                                                                                                                                                      |
| TS28Fae17601 CDS CDS                    | 2.0 | 91.5  | 0.1 | G | COG2211                         | Na <sup>+</sup> /melibiose symporter and related transporters                                                                                                                     |
| TS28Fae15649 CDS CDS                    | 1.0 | 46.0  | 0.1 | G | COG3345                         | Alpha-galactosidase                                                                                                                                                               |
| TS29Fae05447 CDS CDS                    | 1.0 | 46.0  | 0.1 | G | COG3250                         | Beta-galactosidase/beta-glucuronidase                                                                                                                                             |
| TS28Bif1654 CDS CDS                     | 0.5 | 23.0  | 0.1 | G | COG1175                         | ABC-type sugar transport systems, permease components                                                                                                                             |
| TS28Clo01024 CDS CDS                    | 5.0 | 230.0 | 0.1 | G | COG0406                         | Fructose-2,6-bisphosphatase                                                                                                                                                       |
| FpraM2121881 CDS CDS                    | 1.1 | 50.0  | 0.1 | G | COG2190 COG1264 COG1263         | Phosphotransferase system IIA components Phosphotransferase system IIB components Phosphotransferase system IIC components, glucose/maltose/N-acetylglucosamine-specific          |
| TS28Eub6845 CDS CDS                     | 1.0 | 46.5  | 0.1 | G | COG1175                         | ABC-type sugar transport systems, permease components                                                                                                                             |
| TS28Rum09738 CDS CDS                    | 1.0 | 47.0  | 0.1 | G | COG3345                         | Alpha-galactosidase                                                                                                                                                               |
| TS28Dor0178 CDS CDS                     | 0.5 | 23.5  | 0.1 | G | COG1653                         | ABC-type sugar transport system, periplasmic component                                                                                                                            |
| TS28Eub6218 CDS CDS                     | 1.0 | 47.0  | 0.1 | G | COG0063                         | Predicted sugar kinase                                                                                                                                                            |
| TS29Rum11778 CDS CDS                    | 2.0 | 95.5  | 0.1 | G | COG1874                         | Beta-galactosidase                                                                                                                                                                |
| TS28Fae17531 CDS CDS                    | 0.5 | 24.0  | 0.1 | G | COG1482                         | Phosphomannose isomerase                                                                                                                                                          |
| TS28Eub5384 CDS CDS                     | 1.0 | 49.0  | 0.1 | G | COG0366 COG3408 COG3281         | Glycosidases Glycogen debranching enzyme Uncharacterized protein, probably involved in trehalose biosynthesis                                                                     |
| TS28Fae20033 CDS CDS                    | 1.0 | 49.0  | 0.1 | G | COG0205                         | 6-phosphofructokinase                                                                                                                                                             |
| TS28Rum16036 CDS CDS                    | 2.5 | 124.5 | 0.1 | G | COG0058                         | Glucan phosphorylase                                                                                                                                                              |
| FpraM2121911 CDS CDS                    | 0.2 | 10.0  | 0.1 | G | COG3855                         | Uncharacterized protein conserved in bacteria                                                                                                                                     |
| TS28Clo00598 CDS CDS                    | 2.0 | 101.5 | 0.1 | G | COG0524                         | Sugar kinases, ribokinase family                                                                                                                                                  |
| TS29Rum16571 CDS CDS                    | 0.5 | 26.0  | 0.1 | G | COG1879 COG4213                 | ABC-type sugar transport system, periplasmic component ABC-type xylose transport system, periplasmic component                                                                    |
| TS28Rum07758 CDS CDS                    | 1.0 | 52.0  | 0.1 | G | COG0366 COG1523 COG1640         | Glycosidases Type II secretory pathway, pullulanase PulA and related glycosidases 4-alpha-glucanotransferase                                                                      |
| TS28Rum14101 CDS CDS                    | 0.3 | 17.5  | 0.1 | G | COG0176                         | Transaldolase                                                                                                                                                                     |
| TS29Rum20666 CDS CDS                    | 0.3 | 17.5  | 0.1 | G | COG0176                         | Transaldolase                                                                                                                                                                     |
| TS28Bac6863 CDS CDS                     | 0.3 | 18.5  | 0.1 | G | COG1523                         | Type II secretory pathway, pullulanase PulA and related glycosidases                                                                                                              |
| TS28Rum12294 CDS CDS                    | 0.7 | 37.0  | 0.1 | G | COG0205                         | 6-phosphofructokinase                                                                                                                                                             |
| TS28Clo01412 CDS CDS                    | 3.0 | 167.0 | 0.1 | G | COG0057                         | Glyceraldehyde-3-phosphate dehydrogenase/erythrose-4-phosphate dehydrogenase                                                                                                      |
| TS28Eub7077 CDS CDS                     | 0.3 | 14.0  | 0.1 | G | COG3408                         | Glycogen debranching enzyme                                                                                                                                                       |
| TS28Fae13794 CDS CDS                    | 0.5 | 29.0  | 0.1 | G | COG2152                         | Predicted glycosylase                                                                                                                                                             |
| TS28Clo01413 CDS CDS                    | 3.0 | 174.0 | 0.1 | G | COG0126 COG0149                 | 3-phosphoglycerate kinase Triosephosphate isomerase                                                                                                                               |
| TS28Bif2348 CDS CDS                     | 0.3 | 19.3  | 0.1 | G | COG0448                         | ADP-glucose pyrophosphorylase                                                                                                                                                     |
| TS28Fae14434 CDS CDS                    | 1.0 | 59.0  | 0.1 | G | COG4806                         | L-rhamnose isomerase                                                                                                                                                              |
| TS28Eub7902 CDS CDS                     | 1.5 | 89.0  | 0.1 | G | COG3855                         | Uncharacterized protein conserved in bacteria                                                                                                                                     |
| TS28Fae18322 CDS CDS                    | 0.3 | 21.0  | 0.1 | G | COG3717                         | 5-keto 4-deoxyuronate isomerase                                                                                                                                                   |
| TS28Eub8799 CDS CDS                     | 1.0 | 64.5  | 0.1 | G | COG0205                         | 6-phosphofructokinase                                                                                                                                                             |
| TS28Eub0705 CDS CDS                     | 1.0 | 64.5  | 0.1 | G | COG0148                         | Enolase                                                                                                                                                                           |
| TS28Bac0445 CDS CDS                     | 1.0 | 66.0  | 0.1 | G | COG1501                         | Alpha-glucosidases, family 31 of glycosyl hydrolases                                                                                                                              |
| TS28Fae14446 CDS CDS                    | 2.0 | 132.5 | 0.0 | G | COG3250                         | Beta-galactosidase/beta-glucuronidase                                                                                                                                             |
| TS28Bif1192 CDS CDS                     | 0.3 | 16.7  | 0.0 | G | COG0366                         | Glycosidases                                                                                                                                                                      |
| TS28Fae11102 CDS CDS                    | 0.5 | 33.5  | 0.0 | G | COG4668 COG2213                 | Mannitol/fructose-specific phosphotransferase system, IIA domain Phosphotransferase system, mannitol-specific IIBC component                                                      |

|                                    |      |       |      |         |                                                                 |                                                                                                                                                                                                                                                                                                                                                                                                                                   |
|------------------------------------|------|-------|------|---------|-----------------------------------------------------------------|-----------------------------------------------------------------------------------------------------------------------------------------------------------------------------------------------------------------------------------------------------------------------------------------------------------------------------------------------------------------------------------------------------------------------------------|
| TS28Dor0270 CDS CDS                | 0.5  | 33.5  | 0.0  | G       | COG1472                                                         | Beta-glucosidase-related glycosidases                                                                                                                                                                                                                                                                                                                                                                                             |
| TS28Fae21320 CDS CDS               | 0.5  | 34.2  | 0.0  | G       | COG3507                                                         | Beta-xylosidase                                                                                                                                                                                                                                                                                                                                                                                                                   |
| TS29Bif0340 CDS CDS                | 0.3  | 23.0  | 0.0  | G       | COG0366                                                         | Glycosidases                                                                                                                                                                                                                                                                                                                                                                                                                      |
| TS28Eub6222 CDS CDS                | 1.0  | 70.0  | 0.0  | G       | COG0297                                                         | Glycogen synthase                                                                                                                                                                                                                                                                                                                                                                                                                 |
| TS29Rum13471 CDS CDS               | 1.0  | 72.0  | 0.0  | G       | COG3459                                                         | Cellobiose phosphorylase                                                                                                                                                                                                                                                                                                                                                                                                          |
| TS28Eub6543 CDS CDS                | 2.0  | 147.5 | 0.0  | G       | COG1523                                                         | Type II secretory pathway, pullulanase PuA and related glycosidases                                                                                                                                                                                                                                                                                                                                                               |
| TS28Fae21446 CDS CDS               | 0.5  | 37.0  | 0.0  | G       | COG3345                                                         | Alpha-galactosidase                                                                                                                                                                                                                                                                                                                                                                                                               |
| TS28Fae18435 CDS CDS               | 0.5  | 37.5  | 0.0  | G       | COG0058                                                         | Glucan phosphorylase                                                                                                                                                                                                                                                                                                                                                                                                              |
| TS28Fae06035 CDS CDS               | 0.5  | 38.0  | 0.0  | G       | COG3250                                                         | Beta-galactosidase/beta-glucuronidase                                                                                                                                                                                                                                                                                                                                                                                             |
| TS28Rum03130 CDS CDS               | 0.3  | 25.5  | 0.0  | G       | COG1640 COG3280                                                 | 4-alpha-glucanotransferase Maltooligosyl trehalose synthase                                                                                                                                                                                                                                                                                                                                                                       |
| TS28Bif3089 CDS CDS                | 0.3  | 19.3  | 0.0  | G       | COG0057                                                         | Glyceraldehyde-3-phosphate dehydrogenase/erythrose-4-phosphate dehydrogenase                                                                                                                                                                                                                                                                                                                                                      |
| TS29Bif0273 CDS CDS                | 0.3  | 26.0  | 0.0  | G       | COG1874                                                         | Beta-galactosidase                                                                                                                                                                                                                                                                                                                                                                                                                |
| TS28Rum11332 CDS CDS               | 0.3  | 26.0  | 0.0  | G       | COG1129 COG3845                                                 | ABC-type sugar transport system, ATPase component ABC-type uncharacterized transport systems, ATPase components                                                                                                                                                                                                                                                                                                                   |
| TS29Bif0584 CDS CDS                | 0.3  | 19.7  | 0.0  | G       | COG0366                                                         | Glycosidases                                                                                                                                                                                                                                                                                                                                                                                                                      |
| TS28Clo01086 CDS CDS               | 2.0  | 162.0 | 0.0  | G       | COG4632                                                         | Exopolysaccharide biosynthesis protein related to N-acetylglucosamine-1-phosphodiester alpha-N-acetylglucosaminidase                                                                                                                                                                                                                                                                                                              |
| TS28Rum12499 CDS CDS               | 0.3  | 22.0  | 0.0  | G       | COG0205                                                         | 6-phosphofruktokinase                                                                                                                                                                                                                                                                                                                                                                                                             |
| Rtor1047 CDS CDS                   | 0.5  | 44.5  | 0.0  | G       | COG3525                                                         | N-acetyl-beta-hexosaminidase                                                                                                                                                                                                                                                                                                                                                                                                      |
| TS28Eub6433 CDS CDS                | 1.0  | 89.0  | 0.0  | G       | COG1472                                                         | Beta-glucosidase-related glycosidases                                                                                                                                                                                                                                                                                                                                                                                             |
| TS28Eub8026 CDS CDS                | 0.5  | 45.5  | 0.0  | G       | COG3345                                                         | Alpha-galactosidase                                                                                                                                                                                                                                                                                                                                                                                                               |
| Robe3230 CDS CDS                   | 0.3  | 31.0  | 0.0  | G       | COG2160                                                         | L-arabinose isomerase                                                                                                                                                                                                                                                                                                                                                                                                             |
| TS28Fae13618 CDS CDS               | 0.3  | 31.0  | 0.0  | G       | COG1904                                                         | Glucuronate isomerase                                                                                                                                                                                                                                                                                                                                                                                                             |
| TS28Bac5054 CDS CDS                | 0.3  | 31.0  | 0.0  | G       | COG1830                                                         | DhnA-type fructose-1,6-bisphosphate aldolase and related enzymes                                                                                                                                                                                                                                                                                                                                                                  |
| Bpse1316 CDS CDS                   | 0.3  | 24.0  | 0.0  | G       | COG1640 COG3280                                                 | 4-alpha-glucanotransferase Maltooligosyl trehalose synthase                                                                                                                                                                                                                                                                                                                                                                       |
| TS28Rum12056 CDS CDS               | 0.7  | 64.3  | 0.0  | G       | COG0058                                                         | Glucan phosphorylase                                                                                                                                                                                                                                                                                                                                                                                                              |
| TS28Fae17619 CDS CDS               | 1.0  | 97.5  | 0.0  | G       | COG0366 COG3281 COG1640                                         | Glycosidases Uncharacterized protein, probably involved in trehalose biosynthesis 4-alpha-glucanotransferase                                                                                                                                                                                                                                                                                                                      |
| Bpse1332 CDS CDS                   | 0.3  | 34.5  | 0.0  | G       | COG1874                                                         | Beta-galactosidase                                                                                                                                                                                                                                                                                                                                                                                                                |
| TS28Bif1656 CDS CDS                | 0.3  | 36.5  | 0.0  | G       | COG1874                                                         | Beta-galactosidase                                                                                                                                                                                                                                                                                                                                                                                                                |
| Ehal1351 CDS CDS                   | 0.8  | 86.8  | 0.0  | G       | COG3250                                                         | Beta-galactosidase/beta-glucuronidase                                                                                                                                                                                                                                                                                                                                                                                             |
| TS28Eub8470 CDS CDS                | 1.0  | 118.0 | 0.0  | G       | COG0574 COG4668 COG1080 COG3412                                 | Phosphoenolpyruvate synthase/pyruvate phosphate dikinase Mannitol/fructose-specific phosphotransferase system, IIA domain Phosphoenolpyruvate-protein kinase (PTS system EI component in bacteria) Uncharacterized protein conserved in bacteria                                                                                                                                                                                  |
| TS28Eub0949 CDS CDS                | 0.5  | 62.0  | 0.0  | G       | COG0126 COG0149                                                 | 3-phosphoglycerate kinase Triosephosphate isomerase                                                                                                                                                                                                                                                                                                                                                                               |
| EUBREC2820 CDS beta-glucosidase    | 1.0  | 126.0 | 0.0  | G       | COG1472                                                         | Beta-glucosidase-related glycosidases                                                                                                                                                                                                                                                                                                                                                                                             |
| TS28Eub5752 CDS CDS                | 0.2  | 22.0  | 0.0  | G       | COG0574 COG4668 COG1080 COG3412 COG2190                         | Phosphoenolpyruvate synthase/pyruvate phosphate dikinase Mannitol/fructose-specific phosphotransferase system, IIA domain Phosphoenolpyruvate-protein kinase (PTS system EI component in bacteria) Uncharacterized protein conserved in bacteria Phosphotransferase system IIA components                                                                                                                                         |
| EUBREC0489 CDS alpha-galactosidase | 0.5  | 69.5  | 0.0  | G       | COG3345                                                         | Alpha-galactosidase                                                                                                                                                                                                                                                                                                                                                                                                               |
| TS28Eub6357 CDS CDS                | 0.5  | 76.0  | 0.0  | G       | COG1523                                                         | Type II secretory pathway, pullulanase PuA and related glycosidases                                                                                                                                                                                                                                                                                                                                                               |
| TS28Clo01491 CDS CDS               | 2.0  | 320.0 | 0.0  | G       | COG1501                                                         | Alpha-glucosidases, family 31 of glycosyl hydrolases                                                                                                                                                                                                                                                                                                                                                                              |
| TS29Bif0101 CDS CDS                | 0.2  | 37.5  | 0.0  | G       | COG3525                                                         | N-acetyl-beta-hexosaminidase                                                                                                                                                                                                                                                                                                                                                                                                      |
| TS28Eub6849 CDS CDS                | 0.5  | 94.0  | 0.0  | G       | COG0153                                                         | Galactokinase                                                                                                                                                                                                                                                                                                                                                                                                                     |
| TS28Eub1268 CDS CDS                | 0.7  | 140.0 | 0.0  | G       | COG3459                                                         | Cellobiose phosphorylase                                                                                                                                                                                                                                                                                                                                                                                                          |
| TS28Bif0093 CDS CDS                | 0.2  | 47.5  | 0.0  | G       | COG3525                                                         | N-acetyl-beta-hexosaminidase                                                                                                                                                                                                                                                                                                                                                                                                      |
| TS28Bif1731 CDS CDS                | 0.3  | 96.0  | 0.0  | G       | COG0366                                                         | Glycosidases                                                                                                                                                                                                                                                                                                                                                                                                                      |
| TS28Eub8454 CDS CDS                | 0.3  | 100.3 | 0.0  | G       | COG0366 COG1523                                                 | Glycosidases Type II secretory pathway, pullulanase PuA and related glycosidases                                                                                                                                                                                                                                                                                                                                                  |
| TS28Bif0039 CDS CDS                | 0.3  | 88.0  | 0.0  | G       | COG1640 COG3280                                                 | 4-alpha-glucanotransferase Maltooligosyl trehalose synthase                                                                                                                                                                                                                                                                                                                                                                       |
| TS28Fae16517 CDS CDS               | 1.0  | 35.0  | 0.1  | G F K I | COG4753 COG2207 COG3437 COG4936 COG2169 COG3708 COG3664 COG4977 | Response regulator containing CheY-like receiver domain and AraC-type DNA-binding domain AraC-type DNA-binding domain-containing proteins Response regulator containing a CheY-like receiver domain and an HD-GYP domain Predicted sensor domain Adenosine deaminase Uncharacterized protein conserved in bacteria Beta-xylosidase Transcriptional regulator containing an amidase domain and an AraC-type DNA-binding HTH domain |
| TS28Clo01353 CDS CDS               | 2.0  | 86.0  | 0.1  | G H     | COG0698 COG2227                                                 | Ribose 5-phosphate isomerase RpiB 2-polypropyl-3-methyl-5-hydroxy-6-metox-1,4-benzoquinol methylase                                                                                                                                                                                                                                                                                                                               |
| Bdor2526 CDS CDS                   | 19.3 | 4.0   | 16.0 | G I     | COG1597 COG1803                                                 | Sphingosine kinase and enzymes related to eukaryotic diacylglycerol kinase Methylglyoxal synthase                                                                                                                                                                                                                                                                                                                                 |
| TS28Fae12497 CDS CDS               | 0.7  | 58.0  | 0.0  | G I H   | COG0021 COG1154 COG3958                                         | Transketolase Deoxyxylulose-5-phosphate synthase Transketolase, C-terminal subunit                                                                                                                                                                                                                                                                                                                                                |
| TS28Fae06004 CDS CDS               | 7.0  | 1.0   | 23.1 | G K     | COG1879 COG1609                                                 | ABC-type sugar transport system, periplasmic component Transcriptional regulators                                                                                                                                                                                                                                                                                                                                                 |
| TS29Rum00106 CDS CDS               | 2.0  | 0.5   | 13.2 | G K     | COG1349                                                         | Transcriptional regulators of sugar metabolism                                                                                                                                                                                                                                                                                                                                                                                    |
| TS28Eub0176 CDS CDS                | 0.5  | 21.0  | 0.1  | G K     | COG2207 COG3664                                                 | AraC-type DNA-binding domain-containing proteins Beta-xylosidase                                                                                                                                                                                                                                                                                                                                                                  |
| TS28Met1378 CDS CDS                | 0.3  | 11.3  | 0.1  | G K     | COG1548                                                         | Predicted transcriptional regulator/sugar kinase                                                                                                                                                                                                                                                                                                                                                                                  |
| TS28Fae20061 CDS CDS               | 0.5  | 24.0  | 0.1  | G K     | COG1940                                                         | Transcriptional regulator/sugar kinase                                                                                                                                                                                                                                                                                                                                                                                            |
| TS28Eub5184 CDS CDS                | 0.5  | 40.5  | 0.0  | G K     | COG1349                                                         | Transcriptional regulators of sugar metabolism                                                                                                                                                                                                                                                                                                                                                                                    |

|                      |      |       |      |           |                                                                                                                                 |                                                                                                                                                                                                                                                                                                                                                                                                                                                                                                                                                                                                                                                                                                                                                                                                                                                                         |
|----------------------|------|-------|------|-----------|---------------------------------------------------------------------------------------------------------------------------------|-------------------------------------------------------------------------------------------------------------------------------------------------------------------------------------------------------------------------------------------------------------------------------------------------------------------------------------------------------------------------------------------------------------------------------------------------------------------------------------------------------------------------------------------------------------------------------------------------------------------------------------------------------------------------------------------------------------------------------------------------------------------------------------------------------------------------------------------------------------------------|
| TS29Bac09752 CDS CDS | 7.0  | 1.0   | 23.1 | G K T     | COG0642 COG5002 COG2202 COG0745 COG4753 COG2207 COG0784 COG3437 COG3706 COG4251 COG2197 COG1879                                 | Signal transduction histidine kinase Signal transduction histidine kinase FOG: PAS/PAC domain Response regulators consisting of a CheY-like receiver domain and a winged-helix DNA-binding domain Response regulator containing CheY-like receiver domain and AraC-type DNA-binding domain AraC-type DNA-binding domain-containing proteins FOG: CheY-like receiver Response regulator containing a CheY-like receiver domain and an HD-GYP domain Response regulator containing a CheY-like receiver domain and a GGDEF domain Bacteriophytochrome (light-regulated signal transduction histidine kinase) Response regulator containing a CheY-like receiver domain and an HTH DNA-binding domain ABC-type sugar transport system, periplasmic component                                                                                                               |
| TS29Bac11499 CDS CDS | 4.3  | 1.0   | 14.3 | G K T     | COG0642 COG5002 COG2202 COG0745 COG4753 COG2207 COG2770 COG0784 COG2198 COG2203 COG2972 COG5001 COG3706 COG4251 COG1879 COG2114 | Signal transduction histidine kinase Signal transduction histidine kinase FOG: PAS/PAC domain Response regulators consisting of a CheY-like receiver domain and a winged-helix DNA-binding domain Response regulator containing CheY-like receiver domain and AraC-type DNA-binding domain AraC-type DNA-binding domain-containing proteins FOG: HAMP domain FOG: CheY-like receiver FOG: HPT domain FOG: GAF domain Predicted signal transduction protein with a C-terminal ATPase domain Predicted signal transduction protein containing a membrane domain, an EAL and a GGDEF domain Response regulator containing a CheY-like receiver domain and a GGDEF domain Bacteriophytochrome (light-regulated signal transduction histidine kinase) ABC-type sugar transport system, periplasmic component Adenylate cyclase, family 3 (some proteins contain HAMP domain) |
| TS28Rum12127 CDS CDS | 1.0  | 48.0  | 0.1  | G K T     | COG4219 COG4632                                                                                                                 | Antirepressor regulating drug resistance, predicted signal transduction N-terminal membrane component Exopolysaccharide biosynthesis protein related to N-acetylglucosamine-1-phosphodiester alpha-N-acetylglucosaminidase                                                                                                                                                                                                                                                                                                                                                                                                                                                                                                                                                                                                                                              |
| TS28Eub4898 CDS CDS  | 0.5  | 41.0  | 0.0  | G K T     | COG4753 COG2207 COG3664                                                                                                         | Response regulator containing CheY-like receiver domain and AraC-type DNA-binding domain AraC-type DNA-binding domain-containing proteins Beta-xylosidase                                                                                                                                                                                                                                                                                                                                                                                                                                                                                                                                                                                                                                                                                                               |
| TS29Fae08636 CDS CDS | 7.5  | 1.0   | 24.8 | G M       | COG1134                                                                                                                         | ABC-type polysaccharide/polyol phosphate transport system, ATPase component                                                                                                                                                                                                                                                                                                                                                                                                                                                                                                                                                                                                                                                                                                                                                                                             |
| TS29Bac05444 CDS CDS | 2.3  | 0.5   | 15.4 | G M       | COG3507 COG5498 COG3940                                                                                                         | Beta-xylosidase Predicted glycosyl hydrolase Predicted beta-xylosidase                                                                                                                                                                                                                                                                                                                                                                                                                                                                                                                                                                                                                                                                                                                                                                                                  |
| TS29Fae06667 CDS CDS | 6.8  | 1.5   | 15.1 | G M       | COG3594 COG0463 COG0726 COG1887 COG1442                                                                                         | Fucose 4-O-acetylase and related acetyltransferases Glycosyltransferases involved in cell wall biogenesis Predicted xylanase/chitin deacetylase Putative glycosyl/glycerophosphate transferases involved in teichoic acid biosynthesis TagF/TagB/EpsJ/RodC Lipopolysaccharide biosynthesis proteins, LPS:glycosyltransferases                                                                                                                                                                                                                                                                                                                                                                                                                                                                                                                                           |
| TS29Fae05734 CDS CDS | 1.3  | 0.3   | 13.2 | G M       | COG3594 COG0463 COG1887 COG1442                                                                                                 | Fucose 4-O-acetylase and related acetyltransferases Glycosyltransferases involved in cell wall biogenesis Putative glycosyl/glycerophosphate transferases involved in teichoic acid biosynthesis TagF/TagB/EpsJ/RodC Lipopolysaccharide biosynthesis proteins, LPS:glycosyltransferases                                                                                                                                                                                                                                                                                                                                                                                                                                                                                                                                                                                 |
| TS28Clo03965 CDS CDS | 0.5  | 19.0  | 0.1  | G M       | COG1086                                                                                                                         | Predicted nucleoside-diphosphate sugar epimerases                                                                                                                                                                                                                                                                                                                                                                                                                                                                                                                                                                                                                                                                                                                                                                                                                       |
| TS28Rum14200 CDS CDS | 0.5  | 21.0  | 0.1  | G M       | COG4249 COG0726 COG1215 COG3858                                                                                                 | Uncharacterized protein containing caspase domain Predicted xylanase/chitin deacetylase Glycosyltransferases, probably involved in cell wall biogenesis Predicted glycosyl hydrolase                                                                                                                                                                                                                                                                                                                                                                                                                                                                                                                                                                                                                                                                                    |
| TS28Fae01858 CDS CDS | 0.3  | 11.0  | 0.1  | G M       | COG3594 COG0463 COG0726 COG1887 COG1442                                                                                         | Fucose 4-O-acetylase and related acetyltransferases Glycosyltransferases involved in cell wall biogenesis Predicted xylanase/chitin deacetylase Putative glycosyl/glycerophosphate transferases involved in teichoic acid biosynthesis TagF/TagB/EpsJ/RodC Lipopolysaccharide biosynthesis proteins, LPS:glycosyltransferases                                                                                                                                                                                                                                                                                                                                                                                                                                                                                                                                           |
| TS29Rum20836 CDS CDS | 0.5  | 24.0  | 0.1  | G M       | COG0451                                                                                                                         | Nucleoside-diphosphate-sugar epimerases                                                                                                                                                                                                                                                                                                                                                                                                                                                                                                                                                                                                                                                                                                                                                                                                                                 |
| TS28Fae03201 CDS CDS | 0.3  | 19.0  | 0.1  | G M       | COG0451 COG1088                                                                                                                 | Nucleoside-diphosphate-sugar epimerases dTDP-D-glucose 4,6-dehydratase                                                                                                                                                                                                                                                                                                                                                                                                                                                                                                                                                                                                                                                                                                                                                                                                  |
| TS28Clo01150 CDS CDS | 2.0  | 120.0 | 0.1  | G M       | COG3594 COG0463 COG1887 COG1442 COG4641                                                                                         | Fucose 4-O-acetylase and related acetyltransferases Glycosyltransferases involved in cell wall biogenesis Putative glycosyl/glycerophosphate transferases involved in teichoic acid biosynthesis TagF/TagB/EpsJ/RodC Lipopolysaccharide biosynthesis proteins, LPS:glycosyltransferases Uncharacterized protein conserved in bacteria                                                                                                                                                                                                                                                                                                                                                                                                                                                                                                                                   |
| TS28Fae22076 CDS CDS | 0.5  | 30.5  | 0.1  | G M       | COG3594 COG0463 COG1887 COG1442                                                                                                 | Fucose 4-O-acetylase and related acetyltransferases Glycosyltransferases involved in cell wall biogenesis Putative glycosyl/glycerophosphate transferases involved in teichoic acid biosynthesis TagF/TagB/EpsJ/RodC Lipopolysaccharide biosynthesis proteins, LPS:glycosyltransferases                                                                                                                                                                                                                                                                                                                                                                                                                                                                                                                                                                                 |
| TS28Eub7897 CDS CDS  | 0.8  | 68.0  | 0.0  | G M       | COG0451 COG3475                                                                                                                 | Nucleoside-diphosphate-sugar epimerases LPS biosynthesis protein                                                                                                                                                                                                                                                                                                                                                                                                                                                                                                                                                                                                                                                                                                                                                                                                        |
| TS29Fae05174 CDS CDS | 10.0 | 2.0   | 16.5 | G M K     | COG4464 COG1316                                                                                                                 | Capsular polysaccharide biosynthesis protein Transcriptional regulator                                                                                                                                                                                                                                                                                                                                                                                                                                                                                                                                                                                                                                                                                                                                                                                                  |
| TS28Met1454 CDS CDS  | 1.3  | 90.8  | 0.0  | G O M U W | COG4932 COG5295 COG3210 COG2730 COG4870                                                                                         | Predicted outer membrane protein Autotransporter adhesin Large exoproteins involved in heme utilization or adhesion Endoglucanase Cysteine protease                                                                                                                                                                                                                                                                                                                                                                                                                                                                                                                                                                                                                                                                                                                     |
| TS28Par0448 CDS CDS  | 23.5 | 6.0   | 13.0 | G P       | COG0483 COG1218                                                                                                                 | Archaeal fructose-1,6-bisphosphatase and related enzymes of inositol monophosphatase family 3'-Phosphoadenosine 5'-phosphosulfate (PAPS) 3'-phosphatase                                                                                                                                                                                                                                                                                                                                                                                                                                                                                                                                                                                                                                                                                                                 |



|                      |       |       |       |       |                                         |                                                                                                                                                                                                                                                                                                                    |
|----------------------|-------|-------|-------|-------|-----------------------------------------|--------------------------------------------------------------------------------------------------------------------------------------------------------------------------------------------------------------------------------------------------------------------------------------------------------------------|
| TS29Fae08312 CDS CDS | 4.5   | 0.5   | 29.8  | G T   | COG4668 COG1080 COG3412 COG1762 COG1925 | Mannitol/fructose-specific phosphotransferase system, IIA domain Phosphoenolpyruvate-protein kinase (PTS system EI component in bacteria) Uncharacterized protein conserved in bacteria Phosphotransferase system mannitol/fructose-specific IIA domain (Ntr-type) Phosphotransferase system, HPr-related proteins |
| TS28Eub8515 CDS CDS  | 3.0   | 112.5 | 0.1   | G T   | COG0469 COG3848                         | Pyruvate kinase Phosphohistidine swiveling domain                                                                                                                                                                                                                                                                  |
| TS28Bif4599 CDS CDS  | 0.3   | 9.5   | 0.1   | G T   | COG0469 COG3848                         | Pyruvate kinase Phosphohistidine swiveling domain                                                                                                                                                                                                                                                                  |
| TS29Bif3200 CDS CDS  | 0.3   | 9.5   | 0.1   | G T   | COG0469 COG3848                         | Pyruvate kinase Phosphohistidine swiveling domain                                                                                                                                                                                                                                                                  |
| TS28Fae07042 CDS CDS | 1.0   | 43.0  | 0.1   | G T   | COG1762 COG1445 COG3925                 | Phosphotransferase system mannitol/fructose-specific IIA domain (Ntr-type) Phosphotransferase system fructose-specific component IIB N-terminal domain of the phosphotransferase system fructose-specific component IIB                                                                                            |
| TS28Dor0661 CDS CDS  | 0.5   | 27.5  | 0.1   | G T   | COG4668 COG1080 COG3412 COG3605         | Mannitol/fructose-specific phosphotransferase system, IIA domain Phosphoenolpyruvate-protein kinase (PTS system EI component in bacteria) Uncharacterized protein conserved in bacteria Signal transduction protein containing GAF and PtsI domains                                                                |
| TS28Eub7599 CDS CDS  | 1.0   | 98.0  | 0.0   | G T   | COG1762 COG1445 COG3925                 | Phosphotransferase system mannitol/fructose-specific IIA domain (Ntr-type) Phosphotransferase system fructose-specific component IIB N-terminal domain of the phosphotransferase system fructose-specific component IIB                                                                                            |
| TS28Eub7537 CDS CDS  | 1.0   | 116.5 | 0.0   | G T   | COG4668 COG1080 COG3412 COG3605 COG2190 | Mannitol/fructose-specific phosphotransferase system, IIA domain Phosphoenolpyruvate-protein kinase (PTS system EI component in bacteria) Uncharacterized protein conserved in bacteria Signal transduction protein containing GAF and PtsI domains Phosphotransferase system IIA components                       |
| TS28Met1692 CDS CDS  | 3.0   | 109.5 | 0.1   | G U W | COG5295 COG3210 COG2730                 | Autotransporter adhesin Large exoproteins involved in heme utilization or adhesion Endoglucanase                                                                                                                                                                                                                   |
| TS29Fae05459 CDS CDS | 40.0  | 4.0   | 33.1  | G V   | COG1680 COG1472                         | Beta-lactamase class C and other penicillin binding proteins Beta-glucosidase-related glycosidases                                                                                                                                                                                                                 |
| TS28Clo01706 CDS CDS | 5.0   | 205.0 | 0.1   | G V   | COG1680 COG1472                         | Beta-lactamase class C and other penicillin binding proteins Beta-glucosidase-related glycosidases                                                                                                                                                                                                                 |
| TS28Eub7778 CDS CDS  | 1.0   | 52.0  | 0.1   | G V   | COG1680 COG1472                         | Beta-lactamase class C and other penicillin binding proteins Beta-glucosidase-related glycosidases                                                                                                                                                                                                                 |
| Msmi750907 CDS CDS   | 177.2 | 0.7   | 879.2 | H     | COG4056                                 | Methyl coenzyme M reductase, subunit C                                                                                                                                                                                                                                                                             |
| Msmi740775 CDS CDS   | 54.0  | 0.3   | 714.3 | H     | COG4055                                 | Methyl coenzyme M reductase, subunit D                                                                                                                                                                                                                                                                             |
| Msmi740777 CDS CDS   | 100.8 | 0.5   | 666.3 | H     | COG4057                                 | Methyl coenzyme M reductase, gamma subunit                                                                                                                                                                                                                                                                         |
| Msmi751004 CDS CDS   | 171.5 | 2.5   | 226.9 | H     | COG1572 COG1429                         | Uncharacterized conserved protein Cobalamin biosynthesis protein CobN and related Mg-chelatases                                                                                                                                                                                                                    |
| Msmi740774 CDS CDS   | 167.3 | 3.8   | 147.5 | H     | COG4054                                 | Methyl coenzyme M reductase, beta subunit                                                                                                                                                                                                                                                                          |
| Msmi750900 CDS CDS   | 58.0  | 1.7   | 115.0 | H     | COG4063                                 | Tetrahydromethanopterin S-methyltransferase, subunit A                                                                                                                                                                                                                                                             |
| TS28Met0363 CDS CDS  | 58.0  | 1.7   | 115.0 | H     | COG4063                                 | Tetrahydromethanopterin S-methyltransferase, subunit A                                                                                                                                                                                                                                                             |
| Msmi740783 CDS CDS   | 58.0  | 1.7   | 115.0 | H     | COG4063                                 | Tetrahydromethanopterin S-methyltransferase, subunit A                                                                                                                                                                                                                                                             |
| Msmi750908 CDS CDS   | 76.0  | 2.3   | 111.7 | H     | COG4055                                 | Methyl coenzyme M reductase, subunit D                                                                                                                                                                                                                                                                             |
| Msmi750909 CDS CDS   | 163.9 | 4.9   | 110.2 | H     | COG4054                                 | Methyl coenzyme M reductase, beta subunit                                                                                                                                                                                                                                                                          |
| TS28Met0361 CDS CDS  | 48.8  | 1.5   | 107.5 | H     | COG4064                                 | Tetrahydromethanopterin S-methyltransferase, subunit G                                                                                                                                                                                                                                                             |
| Msmi740785 CDS CDS   | 48.8  | 1.5   | 107.5 | H     | COG4064                                 | Tetrahydromethanopterin S-methyltransferase, subunit G                                                                                                                                                                                                                                                             |
| Msmi750898 CDS CDS   | 48.8  | 1.5   | 107.5 | H     | COG4064                                 | Tetrahydromethanopterin S-methyltransferase, subunit G                                                                                                                                                                                                                                                             |
| Msmi740782 CDS CDS   | 9.5   | 0.3   | 94.2  | H     | COG4062                                 | Tetrahydromethanopterin S-methyltransferase, subunit B                                                                                                                                                                                                                                                             |
| Msmi751280 CDS CDS   | 8.6   | 0.3   | 85.2  | H     | COG0422                                 | Thiamine biosynthesis protein ThiC                                                                                                                                                                                                                                                                                 |
| Msmi750776 CDS CDS   | 12.7  | 0.5   | 84.0  | H     | COG0181                                 | Porphobilinogen deaminase                                                                                                                                                                                                                                                                                          |
| Msmi740778 CDS CDS   | 137.9 | 5.5   | 82.9  | H     | COG4058                                 | Methyl coenzyme M reductase, alpha subunit                                                                                                                                                                                                                                                                         |
| TS28Met0369 CDS CDS  | 112.4 | 4.5   | 82.6  | H     | COG4057                                 | Methyl coenzyme M reductase, gamma subunit                                                                                                                                                                                                                                                                         |
| Msmi750906 CDS CDS   | 112.4 | 4.5   | 82.6  | H     | COG4057                                 | Methyl coenzyme M reductase, gamma subunit                                                                                                                                                                                                                                                                         |
| TS28Met0370 CDS CDS  | 231.8 | 9.7   | 79.3  | H     | COG4056                                 | Methyl coenzyme M reductase, subunit C                                                                                                                                                                                                                                                                             |
| Msmi750905 CDS CDS   | 145.6 | 7.3   | 65.7  | H     | COG4058                                 | Methyl coenzyme M reductase, alpha subunit                                                                                                                                                                                                                                                                         |
| Msmi740786 CDS CDS   | 18.8  | 1.0   | 62.0  | H     | COG1962 COG4063                         | Tetrahydromethanopterin S-methyltransferase, subunit H Tetrahydromethanopterin S-methyltransferase, subunit A                                                                                                                                                                                                      |
| TS29Rum11885 CDS CDS | 101.5 | 6.0   | 55.9  | H     | COG0502 COG0161                         | Biotin synthase and related enzymes Adenosylmethionine-8-amino-7-oxononanoate aminotransferase                                                                                                                                                                                                                     |
| TS28Met0371 CDS CDS  | 84.0  | 5.3   | 52.9  | H     | COG4055                                 | Methyl coenzyme M reductase, subunit D                                                                                                                                                                                                                                                                             |
| Msmi740942 CDS CDS   | 3.8   | 0.3   | 50.3  | H     | COG0535 COG4001 COG2896 COG1964         | Predicted Fe-S oxidoreductases Predicted metal-binding protein Molybdenum cofactor biosynthesis enzyme Predicted Fe-S oxidoreductases                                                                                                                                                                              |
| Msmi741182 CDS CDS   | 4.5   | 0.3   | 44.6  | H     | COG1648 COG0007 COG1587                 | Siroheme synthase (precorrin-2 oxidase/ferrochelatase domain) Uroporphyrinogen-III methylase Uroporphyrinogen-III synthase                                                                                                                                                                                         |
| Msmi750395 CDS CDS   | 3.3   | 0.3   | 43.0  | H     | COG1541                                 | Coenzyme F390 synthetase                                                                                                                                                                                                                                                                                           |
| Msmi751182 CDS CDS   | 6.5   | 0.5   | 42.9  | H     | COG0043                                 | 3-polyprenyl-4-hydroxybenzoate decarboxylase and related decarboxylases                                                                                                                                                                                                                                            |
| TS28Met0372 CDS CDS  | 183.9 | 15.1  | 40.3  | H     | COG4054                                 | Methyl coenzyme M reductase, beta subunit                                                                                                                                                                                                                                                                          |
| Msmi750902 CDS CDS   | 37.8  | 3.2   | 39.4  | H     | COG4061                                 | Tetrahydromethanopterin S-methyltransferase, subunit C                                                                                                                                                                                                                                                             |
| Msmi751148 CDS CDS   | 3.9   | 0.3   | 38.9  | H     | COG0807 COG0108                         | GTP cyclohydrolase II 3,4-dihydroxy-2-butanone 4-phosphate synthase                                                                                                                                                                                                                                                |
| Aco11926 CDS CDS     | 11.0  | 1.0   | 36.4  | H     | COG1488                                 | Nicotinic acid phosphoribosyltransferase                                                                                                                                                                                                                                                                           |
| Msmi750823 CDS CDS   | 5.9   | 0.6   | 33.5  | H     | COG0368                                 | Cobalamin-5-phosphate synthase                                                                                                                                                                                                                                                                                     |
| Robe3392 CDS CDS     | 4.5   | 0.5   | 29.8  | H     | COG2145                                 | Hydroxyethylthiazole kinase, sugar kinase family                                                                                                                                                                                                                                                                   |
| Even0300 CDS CDS     | 9.0   | 1.0   | 29.8  | H     | COG1541                                 | Coenzyme F390 synthetase                                                                                                                                                                                                                                                                                           |
| TS29Bac01470 CDS CDS | 4.5   | 0.5   | 29.8  | H     | COG0196                                 | EAD synthase                                                                                                                                                                                                                                                                                                       |
| Msmi740781 CDS CDS   | 36.3  | 4.2   | 28.8  | H     | COG4061                                 | Tetrahydromethanopterin S-methyltransferase, subunit C                                                                                                                                                                                                                                                             |
| Msmi740780 CDS CDS   | 13.7  | 1.6   | 28.5  | H     | COG4060                                 | Tetrahydromethanopterin S-methyltransferase, subunit D                                                                                                                                                                                                                                                             |
| FpraM2122120 CDS CDS | 4.0   | 0.5   | 26.5  | H     | COG2038 COG2087                         | NaMN:DMB phosphoribosyltransferase Adenosyl cobinamide kinase adenosyl cobinamide phosphate guanylyltransferase                                                                                                                                                                                                    |
| CspSS20131 CDS CDS   | 4.0   | 0.5   | 26.5  | H     | COG0414                                 | Pantothenate synthetase                                                                                                                                                                                                                                                                                            |
| TS28Met0368 CDS CDS  | 199.6 | 26.3  | 25.1  | H     | COG4058                                 | Methyl coenzyme M reductase, alpha subunit                                                                                                                                                                                                                                                                         |
| Msmi740494 CDS CDS   | 6.2   | 0.8   | 24.4  | H     | COG0043                                 | 3-polyprenyl-4-hydroxybenzoate decarboxylase and related decarboxylases                                                                                                                                                                                                                                            |
| TS29Rum17238 CDS CDS | 3.5   | 0.5   | 23.1  | H     | COG2091                                 | Phosphopantetheinyl transferase                                                                                                                                                                                                                                                                                    |
| Msmi740149 CDS CDS   | 1.8   | 0.3   | 23.1  | H     | COG1541                                 | Coenzyme F390 synthetase                                                                                                                                                                                                                                                                                           |
| Robe0308 CDS CDS     | 3.5   | 0.5   | 23.1  | H     | COG1060 COG0502                         | Thiamine biosynthesis enzyme ThiH and related uncharacterized enzymes Biotin synthase and related enzymes                                                                                                                                                                                                          |

|                        |       |       |      |   |                                 |                                                                                                                                       |
|------------------------|-------|-------|------|---|---------------------------------|---------------------------------------------------------------------------------------------------------------------------------------|
| Bdor2192 CDS CDS       | 9.7   | 1.5   | 21.3 | H | COG0352                         | Thiamine monophosphate synthase                                                                                                       |
| Msmi750897 CDS CDS     | 19.3  | 3.0   | 21.2 | H | COG1962 COG4063                 | Tetrahydromethanopterin S-methyltransferase, subunit H Tetrahydromethanopterin S-methyltransferase, subunit A                         |
| Msmi740779 CDS CDS     | 23.5  | 3.7   | 21.2 | H | COG4059                         | Tetrahydromethanopterin S-methyltransferase, subunit E                                                                                |
| TS29Bac08313 CDS CDS   | 2.1   | 0.3   | 20.7 | H | COG1995                         | Pyridoxal phosphate biosynthesis protein                                                                                              |
| TS28Fae04994 CDS CDS   | 31.0  | 5.0   | 20.5 | H | COG0156                         | 7-keto-8-aminopelargonate synthetase and related enzymes                                                                              |
| TS29Bac06524 CDS CDS   | 3.0   | 0.5   | 19.8 | H | COG1541                         | Coenzyme F390 synthetase                                                                                                              |
| Bxyl1481 CDS CDS       | 3.0   | 0.5   | 19.8 | H | COG1541                         | Coenzyme F390 synthetase                                                                                                              |
| BactD21769 CDS CDS     | 6.0   | 1.0   | 19.8 | H | COG0452                         | Phosphonantothenoylcysteine synthetase/decarboxylase                                                                                  |
| Bdor3877 CDS CDS       | 12.0  | 2.0   | 19.8 | H | COG0413                         | Ketopantoate hydroxymethyltransferase                                                                                                 |
| TS28Met0360 CDS CDS    | 41.3  | 7.0   | 19.5 | H | COG1962 COG4063                 | Tetrahydromethanopterin S-methyltransferase, subunit H Tetrahydromethanopterin S-methyltransferase, subunit A                         |
| Msmi750904 CDS CDS     | 25.8  | 4.7   | 18.3 | H | COG4059                         | Tetrahydromethanopterin S-methyltransferase, subunit E                                                                                |
| TS29Rum13305 CDS CDS   | 11.0  | 2.0   | 18.2 | H | COG0635                         | Coproporphyrinogen III oxidase and related Fe-S oxidoreductases                                                                       |
| TS28RumUnc0430 CDS CDS | 16.0  | 3.0   | 17.6 | H | COG2099 COG1903                 | Precorrin-6x reductase Cobalamin biosynthesis protein CbiD                                                                            |
| Msmi750901 CDS CDS     | 9.5   | 1.8   | 17.1 | H | COG4062                         | Tetrahydromethanopterin S-methyltransferase, subunit B                                                                                |
| TS28Met0364 CDS CDS    | 9.5   | 1.8   | 17.1 | H | COG4062                         | Tetrahydromethanopterin S-methyltransferase, subunit B                                                                                |
| RintL10043 CDS CDS     | 5.0   | 1.0   | 16.5 | H | COG1713                         | Predicted HD superfamily hydrolase involved in NAD metabolism                                                                         |
| TS28Clo08770 CDS CDS   | 5.0   | 1.0   | 16.5 | H | COG1541                         | Coenzyme F390 synthetase                                                                                                              |
| TS29Clo1886 CDS CDS    | 5.0   | 1.0   | 16.5 | H | COG1541                         | Coenzyme F390 synthetase                                                                                                              |
| FpraM2122123 CDS CDS   | 2.5   | 0.5   | 16.5 | H | COG1492                         | Cobvric acid synthase                                                                                                                 |
| Msmi750939 CDS CDS     | 1.7   | 0.3   | 16.5 | H | COG0452                         | Phosphonantothenoylcysteine synthetase/decarboxylase                                                                                  |
| Bdor3977 CDS CDS       | 5.0   | 1.0   | 16.5 | H | COG0452                         | Phosphonantothenoylcysteine synthetase/decarboxylase                                                                                  |
| Dlon1060 CDS CDS       | 2.5   | 0.5   | 16.5 | H | COG0352                         | Thiamine monophosphate synthase                                                                                                       |
| Ccom2106 CDS CDS       | 5.0   | 1.0   | 16.5 | H | COG0285 COG0294                 | Folypolyglutamate synthase Dihydropterolate synthase and related enzymes                                                              |
| Csci2222 CDS CDS       | 5.0   | 1.0   | 16.5 | H | COG0285 COG0294                 | Folypolyglutamate synthase Dihydropterolate synthase and related enzymes                                                              |
| BactD21558 CDS CDS     | 2.5   | 0.5   | 16.5 | H | COG0157                         | Nicotinate-nucleotide pyrophosphorylase                                                                                               |
| TS28Met0365 CDS CDS    | 37.8  | 7.7   | 16.3 | H | COG4061                         | Tetrahydromethanopterin S-methyltransferase, subunit C                                                                                |
| ShigsPD90518 CDS CDS   | 4.7   | 1.0   | 15.4 | H | COG2896                         | Molybdenum cofactor biosynthesis enzyme                                                                                               |
| Dlon0780 CDS CDS       | 7.0   | 1.5   | 15.4 | H | COG1995                         | Pyridoxal phosphate biosynthesis protein                                                                                              |
| TS28Met0367 CDS CDS    | 25.8  | 5.7   | 15.1 | H | COG4059                         | Tetrahydromethanopterin S-methyltransferase, subunit E                                                                                |
| Bdor1162 CDS CDS       | 10.0  | 2.3   | 14.2 | H | COG0854                         | Pyridoxal phosphate biosynthesis protein                                                                                              |
| TS28Met1696 CDS CDS    | 402.5 | 95.5  | 13.9 | H | COG1572 COG1429                 | Uncharacterized conserved protein Cobalamin biosynthesis protein CbiN and related Mg-chelataes                                        |
| Ehal0015 CDS CDS       | 2.0   | 0.5   | 13.2 | H | COG2099 COG1903                 | Precorrin-6x reductase Cobalamin biosynthesis protein CbiD                                                                            |
| Aeo13252 CDS CDS       | 4.0   | 1.0   | 13.2 | H | COG1564                         | Thiamine pyrophosphokinase                                                                                                            |
| Msmi751146 CDS CDS     | 2.0   | 0.5   | 13.2 | H | COG1492                         | Cobvric acid synthase                                                                                                                 |
| Msmi750903 CDS CDS     | 20.5  | 5.3   | 12.9 | H | COG4060                         | Tetrahydromethanopterin S-methyltransferase, subunit D                                                                                |
| Msmi750737 CDS CDS     | 7.3   | 1.9   | 12.6 | H | COG0535 COG4001 COG2896 COG1964 | Predicted Fe-S oxidoreductases Predicted metal-binding protein Molybdenum cofactor biosynthesis enzyme Predicted Fe-S oxidoreductases |
| TS28Fae15028 CDS CDS   | 19.0  | 5.0   | 12.6 | H | COG2109                         | ATP:corrinoid adenosyltransferase                                                                                                     |
| TS28Rum16295 CDS CDS   | 101.5 | 27.0  | 12.4 | H | COG0502 COG0161                 | Biotin synthase and related enzymes Adenosylmethionine-8-amino-7-oxononanoate aminotransferase                                        |
| BL1685 CDS SuID        | 1.8   | 0.5   | 11.6 | H | COG1539 COG0801                 | Dihydroneopterin aldolase 7,8-dihydro-6-hydroxymethylpterin-pyrophosphokinase                                                         |
| TS29Fae02334 CDS CDS   | 3.5   | 1.0   | 11.6 | H | COG0854 COG0319                 | Pyridoxal phosphate biosynthesis protein Predicted metal-dependent hydrolase                                                          |
| Pmer1540 CDS CDS       | 7.0   | 2.0   | 11.6 | H | COG0095                         | Lipoate-protein ligase A                                                                                                              |
| BactD12340 CDS CDS     | 1.7   | 0.5   | 11.0 | H | COG0452                         | Phosphonantothenoylcysteine synthetase/decarboxylase                                                                                  |
| Rtor1499 CDS CDS       | 16.5  | 5.0   | 10.9 | H | COG2109                         | ATP:corrinoid adenosyltransferase                                                                                                     |
| Bdor0237 CDS CDS       | 6.5   | 2.0   | 10.7 | H | COG1057 COG1713                 | Nicotinic acid mononucleotide adenyltransferase Predicted HD superfamily hydrolase involved in NAD metabolism                         |
| Msmi741142 CDS CDS     | 1.6   | 0.5   | 10.6 | H | COG1587 COG2959                 | Uroporphyrinogen-III synthase Uncharacterized enzyme of heme biosynthesis                                                             |
| Clep0665 CDS CDS       | 8.0   | 2.5   | 10.6 | H | COG0635                         | Coproporphyrinogen III oxidase and related Fe-S oxidoreductases                                                                       |
| Msmi750831 CDS CDS     | 3.2   | 1.0   | 10.5 | H | COG0382                         | 4-hydroxybenzoate polyprenyltransferase and related prenyltransferases                                                                |
| Bhan0543 CDS CDS       | 6.3   | 2.0   | 10.5 | H | COG0192                         | S-adenosylmethionine synthetase                                                                                                       |
| TS28Rum09689 CDS CDS   | 0.5   | 16.8  | 0.1  | H | COG0181                         | Porphobilinogen deaminase                                                                                                             |
| TS28Fae20138 CDS CDS   | 1.0   | 34.5  | 0.1  | H | COG1893                         | Ketopantoate reductase                                                                                                                |
| TS28Met1166 CDS CDS    | 0.2   | 7.2   | 0.1  | H | COG0142                         | Geranylgeranyl pyrophosphate synthase                                                                                                 |
| TS28Fae07535 CDS CDS   | 0.3   | 12.0  | 0.1  | H | COG2896                         | Molybdenum cofactor biosynthesis enzyme                                                                                               |
| TS28Clo01758 CDS CDS   | 3.0   | 110.0 | 0.1  | H | COG1893                         | Ketopantoate reductase                                                                                                                |
| TS28Rum14043 CDS CDS   | 0.5   | 19.5  | 0.1  | H | COG0302                         | GTP cyclohydrolase I                                                                                                                  |
| TS28Rum13361 CDS CDS   | 1.0   | 39.5  | 0.1  | H | COG0635                         | Coproporphyrinogen III oxidase and related Fe-S oxidoreductases                                                                       |
| TS28Rum09690 CDS CDS   | 0.5   | 21.0  | 0.1  | H | COG0007 COG1648 COG1587         | Uroporphyrinogen-III methylase Siroheme synthase (precorrin-2 oxidase/ferrochelatase domain) Uroporphyrinogen-III synthase            |
| Robe3132 CDS CDS       | 0.5   | 23.0  | 0.1  | H | COG0535 COG2896 COG1964         | Predicted Fe-S oxidoreductases Molybdenum cofactor biosynthesis enzyme Predicted Fe-S oxidoreductases                                 |
| TS28Met1701 CDS CDS    | 0.3   | 15.7  | 0.1  | H | COG1427 COG1060                 | Predicted periplasmic solute-binding protein Thiamine biosynthesis enzyme ThiH and related uncharacterized enzymes                    |
| TS29Bac08714 CDS CDS   | 0.2   | 8.0   | 0.1  | H | COG1060 COG0502                 | Thiamine biosynthesis enzyme ThiH and related uncharacterized enzymes Biotin synthase and related enzymes                             |
| TS28Eub6225 CDS CDS    | 1.0   | 53.0  | 0.1  | H | COG0190                         | 5,10-methylene-tetrahydrofolate dehydrogenase Methenyl tetrahydrofolate cyclohydrolase                                                |
| TS28Eub6949 CDS CDS    | 1.0   | 55.5  | 0.1  | H | COG4822                         | Cobalamin biosynthesis protein CbiK, Co2+ chelatase                                                                                   |
| TS28Fae18752 CDS CDS   | 0.5   | 28.0  | 0.1  | H | COG0535 COG4001 COG2896 COG1964 | Predicted Fe-S oxidoreductases Predicted metal-binding protein Molybdenum cofactor biosynthesis enzyme Predicted Fe-S oxidoreductases |
| TS28Met0696 CDS CDS    | 0.2   | 11.2  | 0.1  | H | COG0113                         | Delta-aminolevulinic acid dehydratase                                                                                                 |
| TS28Met1435 CDS CDS    | 0.3   | 15.3  | 0.1  | H | COG0388 COG0171                 | Predicted amidohydrolase NAD synthase                                                                                                 |
| TS28Clo01629 CDS CDS   | 4.0   | 245.0 | 0.1  | H | COG0388 COG0171                 | Predicted amidohydrolase NAD synthase                                                                                                 |
| TS28Eub6150 CDS CDS    | 1.0   | 66.0  | 0.1  | H | COG0635                         | Coproporphyrinogen III oxidase and related Fe-S oxidoreductases                                                                       |

|                      |      |       |      |       |                                                                 |                                                                                                                                                                                                                                         |
|----------------------|------|-------|------|-------|-----------------------------------------------------------------|-----------------------------------------------------------------------------------------------------------------------------------------------------------------------------------------------------------------------------------------|
| TS28Fae16564 CDS CDS | 1.0  | 77.0  | 0.0  | H     | COG4822                                                         | Cobalamin biosynthesis protein CbiK, Co2+ chelatase                                                                                                                                                                                     |
| TS28Met1020 CDS CDS  | 0.2  | 18.8  | 0.0  | H     | COG2038                                                         | NaMN:DMB phosphoribosyltransferase                                                                                                                                                                                                      |
| TS28Clo00752 CDS CDS | 1.0  | 122.0 | 0.0  | H     | COG0635                                                         | Coproporphyrinogen III oxidase and related Fe-S oxidoreductases                                                                                                                                                                         |
| Dlon1667 CDS CDS     | 0.3  | 51.8  | 0.0  | H     | COG0192                                                         | S-adenosylmethionine synthetase                                                                                                                                                                                                         |
| Cnex3101 CDS CDS     | 0.3  | 55.2  | 0.0  | H     | COG0192                                                         | S-adenosylmethionine synthetase                                                                                                                                                                                                         |
| TS28Eub7936 CDS CDS  | 0.5  | 87.0  | 0.0  | H     | COG0285 COG0294                                                 | Folylpolyglutamate synthase/Dihydropteroate synthase and related enzymes                                                                                                                                                                |
| TS29Dor2247 CDS CDS  | 0.3  | 65.7  | 0.0  | H     | COG0192                                                         | S-adenosylmethionine synthetase                                                                                                                                                                                                         |
| TS28Clo01329 CDS CDS | 1.0  | 243.0 | 0.0  | H     | COG2978                                                         | Putative p-aminobenzoyl-glutamate transporter                                                                                                                                                                                           |
| Msmi750933 CDS CDS   | 3.3  | 0.3   | 43.0 | H C   | COG0543                                                         | 2-polyprenylphenol hydroxylase and related flavodoxin oxidoreductases                                                                                                                                                                   |
| CspM6212214 CDS CDS  | 5.0  | 1.0   | 16.5 | H C   | COG0543                                                         | 2-polyprenylphenol hydroxylase and related flavodoxin oxidoreductases                                                                                                                                                                   |
| Msmi740508 CDS CDS   | 7.8  | 2.3   | 11.1 | H C   | COG1251 COG2158 COG1492 COG2243 COG2073 COG2241 COG2082 COG1010 | NAD(P)H-nitrite reductase Uncharacterized protein containing a Zn-finger-like domain Cobryric acid synthase Precorrin-2 methylase Cobalamin biosynthesis protein CbiG Precorrin-6B methylase Precorrin isomerase Precorrin-3B methylase |
| Csym3626 CDS CDS     | 10.0 | 1.0   | 33.1 | H G I | COG0021 COG1154 COG3958                                         | Transketolase Deoxyxylulose-5-phosphate synthase Transketolase, C-terminal subunit                                                                                                                                                      |
| Acol2917 CDS CDS     | 5.0  | 1.0   | 16.5 | H G I | COG0021 COG1154 COG3958                                         | Transketolase Deoxyxylulose-5-phosphate synthase Transketolase, C-terminal subunit                                                                                                                                                      |
| ShigspD91088 CDS CDS | 3.5  | 1.0   | 11.6 | H I   | COG1767 COG3697                                                 | Triphosphoribosyl-diphospho-CoA synthetase Phosphoribosyl-diphospho-CoA transferase (holo-ACP synthetase)                                                                                                                               |
| CspSS21548 CDS CDS   | 0.5  | 22.0  | 0.1  | H I   | COG1154                                                         | Deoxyxylulose-5-phosphate synthase                                                                                                                                                                                                      |
| Bpse0421 CDS CDS     | 0.3  | 22.5  | 0.0  | H I   | COG1154                                                         | Deoxyxylulose-5-phosphate synthase                                                                                                                                                                                                      |
| Msmi751101 CDS CDS   | 9.1  | 0.7   | 45.2 | H M G | COG0794 COG0269 COG0684 COG1795                                 | Predicted sugar phosphate isomerase involved in capsule formation 3-hexulose-6-phosphate synthase and related proteins Demethylmenaquinone methyltransferase Uncharacterized conserved protein                                          |
| Msmi741130 CDS CDS   | 2.3  | 0.3   | 29.8 | H O   | COG1992 COG0611 COG0309                                         | Uncharacterized conserved protein Thiamine monophosphate kinase Hydrogenase maturation factor                                                                                                                                           |
| Msmi750547 CDS CDS   | 2.3  | 0.3   | 29.8 | H O   | COG1992 COG0611 COG0309                                         | Uncharacterized conserved protein Thiamine monophosphate kinase Hydrogenase maturation factor                                                                                                                                           |
| CspM6212613 CDS CDS  | 18.0 | 1.0   | 59.5 | I     | COG1250                                                         | 3-hydroxyacyl-CoA dehydrogenase                                                                                                                                                                                                         |
| Eeli1143 CDS CDS     | 13.0 | 1.0   | 43.0 | I     | COG0416                                                         | Fatty acid/phospholipid biosynthesis enzyme                                                                                                                                                                                             |
| TS28Fae08352 CDS CDS | 22.0 | 2.0   | 36.4 | I     | COG2057 COG1788                                                 | Acyl CoA:acetate/3-ketoacid CoA transferase, beta subunit Acyl CoA:acetate/3-ketoacid CoA transferase, alpha subunit                                                                                                                    |
| TS28Fae08350 CDS CDS | 11.0 | 1.0   | 36.4 | I     | COG2057                                                         | Acyl CoA:acetate/3-ketoacid CoA transferase, beta subunit                                                                                                                                                                               |
| Ehal0979 CDS CDS     | 11.0 | 1.0   | 36.4 | I     | COG0020                                                         | Undecaprenyl pyrophosphate synthase                                                                                                                                                                                                     |
| Msmi750824 CDS CDS   | 5.3  | 0.5   | 34.7 | I     | COG1267                                                         | Phosphatidylglycerophosphate A and related proteins                                                                                                                                                                                     |
| TS28Fae05115 CDS CDS | 17.0 | 2.0   | 28.1 | I     | COG0416                                                         | Fatty acid/phospholipid biosynthesis enzyme                                                                                                                                                                                             |
| Bdor2836 CDS CDS     | 7.8  | 1.0   | 25.9 | I     | COG0688                                                         | Phosphatidylserine decarboxylase                                                                                                                                                                                                        |
| Msmi750485 CDS CDS   | 12.1 | 1.6   | 25.3 | I     | COG3425                                                         | 3-hydroxy-3-methylglutaryl CoA synthase                                                                                                                                                                                                 |
| Pmer0008 CDS CDS     | 14.0 | 2.0   | 23.1 | I     | COG0439 COG4770                                                 | Biotin carboxylase Acetyl propionyl-CoA carboxylase, alpha subunit                                                                                                                                                                      |
| Msmi741194 CDS CDS   | 10.2 | 1.7   | 20.3 | I     | COG0183                                                         | Acetyl-CoA acetyltransferase                                                                                                                                                                                                            |
| TS29Rum20889 CDS CDS | 6.0  | 1.0   | 19.8 | I     | COG0671                                                         | Membrane-associated phospholipid phosphatase                                                                                                                                                                                            |
| Csym2599 CDS CDS     | 6.0  | 1.0   | 19.8 | I     | COG0416                                                         | Fatty acid/phospholipid biosynthesis enzyme                                                                                                                                                                                             |
| TS28Bac1575 CDS CDS  | 27.0 | 5.0   | 17.9 | I     | COG2185 COG1884                                                 | Methylmalonyl-CoA mutase, C-terminal domain/subunit (cobalamin-binding) Methylmalonyl-CoA mutase, N-terminal domain/subunit                                                                                                             |
| BactD21157 CDS CDS   | 5.4  | 1.0   | 17.9 | I     | COG0688                                                         | Phosphatidylserine decarboxylase                                                                                                                                                                                                        |
| Msmi741193 CDS CDS   | 10.1 | 1.9   | 17.4 | I     | COG3425                                                         | 3-hydroxy-3-methylglutaryl CoA synthase                                                                                                                                                                                                 |
| Dlon0128 CDS CDS     | 5.0  | 1.0   | 16.5 | I     | COG4799                                                         | Acetyl-CoA carboxylase, carboxyltransferase component (subunits alpha and beta)                                                                                                                                                         |
| Csvm3917 CDS CDS     | 5.0  | 1.0   | 16.5 | I     | COG0331                                                         | (acyl-carrier-protein) S-malonyltransferase                                                                                                                                                                                             |
| TS28Clo03439 CDS CDS | 10.0 | 2.0   | 16.5 | I     | COG0183                                                         | Acetyl-CoA acetyltransferase                                                                                                                                                                                                            |
| Svar2369 CDS CDS     | 5.0  | 1.0   | 16.5 | I     | COG0183                                                         | Acetyl-CoA acetyltransferase                                                                                                                                                                                                            |
| Msmi741436 CDS CDS   | 1.7  | 0.3   | 16.5 | I     | COG0170                                                         | Dolichol kinase                                                                                                                                                                                                                         |
| Msmi750283 CDS CDS   | 1.7  | 0.3   | 16.5 | I     | COG0170                                                         | Dolichol kinase                                                                                                                                                                                                                         |
| Msmi750855 CDS CDS   | 4.3  | 1.0   | 14.3 | I     | COG1250                                                         | 3-hydroxyacyl-CoA dehydrogenase                                                                                                                                                                                                         |
| Rgna0317 CDS CDS     | 4.0  | 1.0   | 13.2 | I     | COG4799                                                         | Acetyl-CoA carboxylase, carboxyltransferase component (subunits alpha and beta)                                                                                                                                                         |
| Aput1559 CDS CDS     | 2.0  | 0.5   | 13.2 | I     | COG4799                                                         | Acetyl-CoA carboxylase, carboxyltransferase component (subunits alpha and beta)                                                                                                                                                         |
| RintL10190 CDS CDS   | 4.0  | 1.0   | 13.2 | I     | COG1597                                                         | Sphingosine kinase and enzymes related to eukaryotic diacylglycerol kinase                                                                                                                                                              |
| Bdor0002 CDS CDS     | 14.2 | 4.0   | 11.7 | I     | COG0332                                                         | 3-oxoacyl-[acyl-carrier-protein] synthase III                                                                                                                                                                                           |
| Msmi741029 CDS CDS   | 9.7  | 2.8   | 11.6 | I     | COG0439                                                         | Biotin carboxylase                                                                                                                                                                                                                      |
| TS28Fae18421 CDS CDS | 14.0 | 4.0   | 11.6 | I     | COG2030                                                         | Acyl dehydratase                                                                                                                                                                                                                        |
| ShigspD90991 CDS CDS | 3.5  | 1.0   | 11.6 | I     | COG0657                                                         | Esterase/lipase                                                                                                                                                                                                                         |
| TS28Fae22399 CDS CDS | 5.0  | 1.5   | 11.0 | I     | COG1211                                                         | 4-diphosphocytidyl-2-methyl-D-erythritol synthase                                                                                                                                                                                       |
| Bxy11247 CDS CDS     | 3.3  | 1.0   | 11.0 | I     | COG0439 COG4770                                                 | Biotin carboxylase Acetyl propionyl-CoA carboxylase, alpha subunit                                                                                                                                                                      |
| BactD11354 CDS CDS   | 3.3  | 1.0   | 11.0 | I     | COG0439 COG4770                                                 | Biotin carboxylase Acetyl propionyl-CoA carboxylase, alpha subunit                                                                                                                                                                      |
| Bthe7335680 CDS CDS  | 1.7  | 0.5   | 11.0 | I     | COG0332                                                         | 3-oxoacyl-[acyl-carrier-protein] synthase III                                                                                                                                                                                           |
| TS28Fae20825 CDS CDS | 3.0  | 104.0 | 0.1  | I     | COG3581 COG3580 COG1924                                         | Uncharacterized protein conserved in bacteria Uncharacterized protein conserved in bacteria Activator of 2-hydroxyglutaryl-CoA dehydratase (HSP70-class ATPase domain)                                                                  |
| TS28Fae20697 CDS CDS | 0.7  | 24.5  | 0.1  | I     | COG4799                                                         | Acetyl-CoA carboxylase, carboxyltransferase component (subunits alpha and beta)                                                                                                                                                         |
| TS28Bif3034 CDS CDS  | 0.3  | 12.7  | 0.1  | I     | COG0558                                                         | Phosphatidylglycerophosphate synthase                                                                                                                                                                                                   |
| TS28Eub0147 CDS CDS  | 0.5  | 20.0  | 0.1  | I     | COG1250                                                         | 3-hydroxyacyl-CoA dehydrogenase                                                                                                                                                                                                         |
| TS28Eub6445 CDS CDS  | 1.0  | 42.0  | 0.1  | I     | COG1024 COG1250                                                 | Enoyl-CoA hydratase/carnitine racemase 3-hydroxyacyl-CoA dehydrogenase                                                                                                                                                                  |
| TS28Fae08601 CDS CDS | 0.3  | 14.0  | 0.1  | I     | COG0020                                                         | Undecaprenyl pyrophosphate synthase                                                                                                                                                                                                     |
| TS28Clo01678 CDS CDS | 2.0  | 85.0  | 0.1  | I     | COG0204                                                         | 1-acyl-sn-glycerol-3-phosphate acyltransferase                                                                                                                                                                                          |
| CspM6210569 CDS CDS  | 1.6  | 70.9  | 0.1  | I     | COG1502                                                         | Phosphatidylserine/phosphatidylglycerophosphate/cardiolipin synthases and related enzymes                                                                                                                                               |

|                      |       |       |         |     |                                                 |                                                                                                                                                                                                                                       |
|----------------------|-------|-------|---------|-----|-------------------------------------------------|---------------------------------------------------------------------------------------------------------------------------------------------------------------------------------------------------------------------------------------|
| TS28Fae11977 CDS CDS | 1.0   | 44.5  | 0.1     | I   | COG0657                                         | Esterase/lipase                                                                                                                                                                                                                       |
| RintL10791 CDS CDS   | 1.0   | 44.7  | 0.1     | I   | COG1502                                         | Phosphatidylserine/phosphatidylglycerophosphate/cardioli-<br>synthases and related enzymes                                                                                                                                            |
| Bova3226 CDS CDS     | 0.1   | 6.5   | 0.1     | I   | COG1260                                         | Mvo-inositol-1-phosphate synthase                                                                                                                                                                                                     |
| Ccom1280 CDS CDS     | 0.5   | 21.9  | 0.1     | I   | COG1502                                         | Phosphatidylserine/phosphatidylglycerophosphate/cardioli-<br>synthases and related enzymes                                                                                                                                            |
| Dlon2017 CDS CDS     | 1.3   | 64.2  | 0.1     | I   | COG1502                                         | Phosphatidylserine/phosphatidylglycerophosphate/cardioli-<br>synthases and related enzymes                                                                                                                                            |
| TS28Bif0934 CDS CDS  | 1.0   | 52.3  | 0.1     | I   | COG4982 COG4981                                 | 3-oxoacyl-[acyl-carrier protein] reductase Enoyl reductase<br>domain of yeast-type FAS1                                                                                                                                               |
| TS28Rum13913 CDS CDS | 0.5   | 28.5  | 0.1     | I   | COG3884                                         | Acyl-ACP thioesterase                                                                                                                                                                                                                 |
| TS28Clo00515 CDS CDS | 2.0   | 116.0 | 0.1     | I   | COG1597                                         | Sphingosine kinase and enzymes related to eukaryotic<br>diacylglycerol kinase                                                                                                                                                         |
| TS28Bac8505 CDS CDS  | 0.5   | 29.0  | 0.1     | I   | COG0743                                         | 1-deoxy-D-xvulose 5-phosphate reductoisomerase                                                                                                                                                                                        |
| TS28Bac0460 CDS CDS  | 0.3   | 19.5  | 0.1     | I   | COG4221 COG1211                                 | Short-chain alcohol dehydrogenase of unknown specificity 4-<br>diphosphocytidyl-2-methyl-D-erithritol synthase                                                                                                                        |
| TS28Met0636 CDS CDS  | 0.3   | 14.8  | 0.1     | I   | COG0365                                         | Acyl-coenzyme A synthetases/AMP-(fatty) acid ligases                                                                                                                                                                                  |
| Dlon2016 CDS CDS     | 1.4   | 88.9  | 0.1     | I   | COG1502                                         | Phosphatidylserine/phosphatidylglycerophosphate/cardioli-<br>synthases and related enzymes                                                                                                                                            |
| TS28Eub6406 CDS CDS  | 1.0   | 64.0  | 0.1     | I   | COG0821                                         | Enzyme involved in the deoxyxvulose pathway of isoprenoid<br>biosynthesis                                                                                                                                                             |
| Buni1120 CDS CDS     | 0.2   | 14.5  | 0.0     | I   | COG4799                                         | Acetyl-CoA carboxylase, carboxyltransferase component<br>(subunits alpha and beta)                                                                                                                                                    |
| TS28Eub1501 CDS CDS  | 0.5   | 56.0  | 0.0     | I   | COG2267                                         | Lysophospholipase                                                                                                                                                                                                                     |
| Eeli2701 CDS CDS     | 0.4   | 69.0  | 0.0     | I   | COG1502                                         | Phosphatidylserine/phosphatidylglycerophosphate/cardioli-<br>synthases and related enzymes                                                                                                                                            |
| Rlac0733 CDS CDS     | 0.1   | 24.3  | 0.0     | I   | COG1502                                         | Phosphatidylserine/phosphatidylglycerophosphate/cardioli-<br>synthases and related enzymes                                                                                                                                            |
| TS28Eub5632 CDS CDS  | 0.5   | 110.0 | 0.0     | I   | COG3581 COG3580 C<br>OG1924                     | Uncharacterized protein conserved in bacteria Uncharacterized<br>protein conserved in bacteria Activator of 2-hydroxyglutaryl-<br>CoA dehydratase (HSP70-class ATPase domain)                                                         |
| TS29Rum10008 CDS CDS | 7.0   | 2.0   | 11.6    | I H | COG1154                                         | Deoxvxlulose-5-phosphate synthase                                                                                                                                                                                                     |
| TS29Bif1588 CDS CDS  | 0.3   | 13.0  | 0.1     | I H | COG1154                                         | Deoxvxlulose-5-phosphate synthase                                                                                                                                                                                                     |
| TS28Eub4799 CDS CDS  | 1.0   | 52.5  | 0.1     | I H | COG1154                                         | Deoxvxlulose-5-phosphate synthase                                                                                                                                                                                                     |
| TS28Eub8664 CDS CDS  | 1.0   | 88.5  | 0.0     | I H | COG1154                                         | Deoxvxlulose-5-phosphate synthase                                                                                                                                                                                                     |
| TS29Rum06857 CDS CDS | 385.0 | 1.0   | 1,273.2 | I Q | COG0304                                         | 3-oxoacyl-(acyl-carrier-protein) synthase                                                                                                                                                                                             |
| Msmi741306 CDS CDS   | 10.7  | 0.3   | 105.8   | I Q | COG1028                                         | Dehydrogenases with different specificities (related to short-<br>chain alcohol dehydrogenases)                                                                                                                                       |
| Msmi750377 CDS CDS   | 10.7  | 0.3   | 105.8   | I Q | COG1028                                         | Dehydrogenases with different specificities (related to short-<br>chain alcohol dehydrogenases)                                                                                                                                       |
| TS29Dor0403 CDS CDS  | 36.5  | 3.0   | 40.2    | I Q | COG1028 COG4221                                 | Dehydrogenases with different specificities (related to short-<br>chain alcohol dehydrogenases) Short-chain alcohol<br>dehydrogenase of unknown specificity                                                                           |
| TS29Bac09588 CDS CDS | 4.0   | 0.3   | 39.7    | I Q | COG1022 COG0318                                 | Long-chain acyl-CoA synthetases (AMP-forming) Acyl-CoA<br>synthetases (AMP-forming)/AMP-acid ligases II                                                                                                                               |
| BactD11793 CDS CDS   | 4.0   | 0.3   | 39.7    | I Q | COG0318 COG1022                                 | Acyl-CoA synthetases (AMP-forming)/AMP-acid ligases<br>II Long-chain acyl-CoA synthetases (AMP-forming)                                                                                                                               |
| TS28Par0338 CDS CDS  | 5.0   | 0.5   | 33.1    | I Q | COG0304                                         | 3-oxoacyl-(acyl-carrier-protein) synthase                                                                                                                                                                                             |
| Bxv12434 CDS CDS     | 3.0   | 0.3   | 29.7    | I Q | COG0304                                         | 3-oxoacyl-(acyl-carrier-protein) synthase                                                                                                                                                                                             |
| Ehal1157 CDS CDS     | 3.0   | 0.5   | 19.8    | I Q | COG1028 COG4221 C<br>OG0300                     | Dehydrogenases with different specificities (related to short-<br>chain alcohol dehydrogenases) Short-chain alcohol<br>dehydrogenase of unknown specificity Short-chain<br>dehydrogenases of various substrate specificities          |
| Bste0087 CDS CDS     | 24.0  | 4.0   | 19.8    | I Q | COG1028                                         | Dehydrogenases with different specificities (related to short-<br>chain alcohol dehydrogenases)                                                                                                                                       |
| Bste1896 CDS CDS     | 6.0   | 1.0   | 19.8    | I Q | COG1028                                         | Dehydrogenases with different specificities (related to short-<br>chain alcohol dehydrogenases)                                                                                                                                       |
| Dfor3140 CDS CDS     | 40.5  | 7.0   | 19.1    | I Q | COG1028                                         | Dehydrogenases with different specificities (related to short-<br>chain alcohol dehydrogenases)                                                                                                                                       |
| Bova0854 CDS CDS     | 4.5   | 1.0   | 14.9    | I Q | COG0304                                         | 3-oxoacyl-(acyl-carrier-protein) synthase                                                                                                                                                                                             |
| Ehal0198 CDS CDS     | 14.0  | 3.5   | 13.2    | I Q | COG1028                                         | Dehydrogenases with different specificities (related to short-<br>chain alcohol dehydrogenases)                                                                                                                                       |
| Bdor0045 CDS CDS     | 7.7   | 2.0   | 12.7    | I Q | COG1028                                         | Dehydrogenases with different specificities (related to short-<br>chain alcohol dehydrogenases)                                                                                                                                       |
| TS29Bac04519 CDS CDS | 1.7   | 0.5   | 11.0    | I Q | COG1028                                         | Dehydrogenases with different specificities (related to short-<br>chain alcohol dehydrogenases)                                                                                                                                       |
| BactD12255 CDS CDS   | 1.7   | 0.5   | 11.0    | I Q | COG1028                                         | Dehydrogenases with different specificities (related to short-<br>chain alcohol dehydrogenases)                                                                                                                                       |
| BactD13825 CDS CDS   | 4.3   | 1.3   | 10.7    | I Q | COG0304                                         | 3-oxoacyl-(acyl-carrier-protein) synthase                                                                                                                                                                                             |
| TS29Rum21155 CDS CDS | 1.0   | 34.0  | 0.1     | I Q | COG1028                                         | Dehydrogenases with different specificities (related to short-<br>chain alcohol dehydrogenases)                                                                                                                                       |
| TS29Bif2375 CDS CDS  | 1.1   | 44.1  | 0.1     | I Q | COG0304 COG0331 C<br>OG3321 COG4982 C<br>OG4981 | 3-oxoacyl-(acyl-carrier-protein) synthase (acyl-carrier-protein) S-<br>malonyltransferase Polyketide synthase modules and related<br>proteins 3-oxoacyl-[acyl-carrier protein] reductase Enoyl<br>reductase domain of yeast-type FAS1 |
| TS29Bif1282 CDS CDS  | 2.1   | 87.0  | 0.1     | I Q | COG0304 COG0331 C<br>OG4982 COG4981             | 3-oxoacyl-(acyl-carrier-protein) synthase (acyl-carrier-protein) S-<br>malonyltransferase 3-oxoacyl-[acyl-carrier protein]<br>reductase Enoyl reductase domain of yeast-type FAS1                                                     |
| TS28Eub3875 CDS CDS  | 1.0   | 45.3  | 0.1     | I Q | COG0331 COG3321                                 | (acyl-carrier-protein) S-malonyltransferase Polyketide synthase<br>modules and related proteins                                                                                                                                       |
| TS28Clo00510 CDS CDS | 2.0   | 96.0  | 0.1     | I Q | COG1028                                         | Dehydrogenases with different specificities (related to short-<br>chain alcohol dehydrogenases)                                                                                                                                       |
| TS28Bif3900 CDS CDS  | 2.1   | 254.5 | 0.0     | I Q | COG0304 COG0331 C<br>OG4982 COG4981             | 3-oxoacyl-(acyl-carrier-protein) synthase (acyl-carrier-protein) S-<br>malonyltransferase 3-oxoacyl-[acyl-carrier protein]<br>reductase Enoyl reductase domain of yeast-type FAS1                                                     |
| Bpse1183 CDS CDS     | 0.1   | 17.5  | 0.0     | I Q | COG0331 COG0304 C<br>OG4982 COG4981             | (acyl-carrier-protein) S-malonyltransferase 3-oxoacyl-(acyl-<br>carrier-protein) synthase 3-oxoacyl-[acyl-carrier protein]<br>reductase Enoyl reductase domain of yeast-type FAS1                                                     |
| TS28Bif0933 CDS CDS  | 0.1   | 53.6  | 0.0     | I Q | COG0304 COG0331 C<br>OG3321 COG4982 C<br>OG4981 | 3-oxoacyl-(acyl-carrier-protein) synthase (acyl-carrier-protein) S-<br>malonyltransferase Polyketide synthase modules and related<br>proteins 3-oxoacyl-[acyl-carrier protein] reductase Enoyl<br>reductase domain of yeast-type FAS1 |

|                         |       |      |       |   |                 |                                                                                                              |
|-------------------------|-------|------|-------|---|-----------------|--------------------------------------------------------------------------------------------------------------|
| Bdor4334 CDS CDS        | 59.2  | 1.0  | 195.7 | J | COG0091         | Ribosomal protein L22                                                                                        |
| TS28Bac6836 CDS CDS     | 13.4  | 0.3  | 133.3 | J | COG0092         | Ribosomal protein S3                                                                                         |
| Bdor4349 CDS CDS        | 18.7  | 0.5  | 123.4 | J | COG0080         | Ribosomal protein L11                                                                                        |
| Bdor4498 CDS CDS        | 36.0  | 1.0  | 119.0 | J | COG0360         | Ribosomal protein S6                                                                                         |
| Bxyl1683 CDS CDS        | 14.8  | 0.5  | 97.6  | J | COG0089         | Ribosomal protein L23                                                                                        |
| BactD14452 CDS CDS      | 14.8  | 0.5  | 97.6  | J | COG0089         | Ribosomal protein L23                                                                                        |
| Msmi740406 CDS CDS      | 14.5  | 0.5  | 95.9  | J | COG2139         | Ribosomal protein L21E                                                                                       |
| TS29Bac09449 CDS CDS    | 8.3   | 0.3  | 82.5  | J | COG0198         | Ribosomal protein L24                                                                                        |
| BactD14460 CDS CDS      | 8.3   | 0.3  | 82.5  | J | COG0198         | Ribosomal protein L24                                                                                        |
| Bxyl1674 CDS CDS        | 8.3   | 0.3  | 82.5  | J | COG0198         | Ribosomal protein L24                                                                                        |
| Pmer3253 CDS CDS        | 12.0  | 0.5  | 79.4  | J | COG0211         | Ribosomal protein L27                                                                                        |
| TS29Met0859 CDS CDS     | 4.7   | 0.2  | 76.9  | J | COG0087         | Ribosomal protein L3                                                                                         |
| Bste2297 CDS CDS        | 22.8  | 1.0  | 75.2  | J | COG0089         | Ribosomal protein L23                                                                                        |
| Ccom1709 CDS CDS        | 45.5  | 2.0  | 75.2  | J | COG0008         | Glutamyl- and glutamyl-tRNA synthetases                                                                      |
| Msmi751330 CDS CDS      | 20.3  | 1.0  | 67.2  | J | COG2167         | Ribosomal protein L39E                                                                                       |
| TS28Met1554 CDS CDS     | 20.3  | 1.0  | 67.2  | J | COG2167         | Ribosomal protein L39E                                                                                       |
| Bple0391 CDS CDS        | 20.0  | 1.0  | 66.1  | J | COG0333         | Ribosomal protein L32                                                                                        |
| Hfil1190 CDS CDS        | 10.0  | 0.5  | 66.1  | J | COG0050         | GTPases - translation elongation factors                                                                     |
| Bdor4332 CDS CDS        | 64.6  | 3.5  | 61.1  | J | COG0197         | Ribosomal protein L16/L10E                                                                                   |
| Bdor4318 CDS CDS        | 9.0   | 0.5  | 59.5  | J | COG0099         | Ribosomal protein S13                                                                                        |
| Bdor4325 CDS CDS        | 17.0  | 1.0  | 56.2  | J | COG0096         | Ribosomal protein S8                                                                                         |
| Bcap3102 CDS CDS        | 17.0  | 1.0  | 56.2  | J | COG0080         | Ribosomal protein L11                                                                                        |
| Bdor4342 CDS CDS        | 16.2  | 1.0  | 53.5  | J | COG0048         | Ribosomal protein S12                                                                                        |
| PRABACTJOHN3622 CDS CDS | 8.0   | 0.5  | 52.9  | J | COG1187         | 16S rRNA uridine-516 pseudouridylate synthase and related pseudouridylate synthases                          |
| Msmi740409 CDS CDS      | 10.6  | 0.7  | 52.5  | J | COG0030         | Dimethyladenosine transferase (rRNA methylation)                                                             |
| TS29Bac10602 CDS CDS    | 7.7   | 0.5  | 50.7  | J | COG0360         | Ribosomal protein S6                                                                                         |
| BactD12035 CDS CDS      | 7.7   | 0.5  | 50.7  | J | COG0360         | Ribosomal protein S6                                                                                         |
| Dfor0679 CDS CDS        | 15.0  | 1.0  | 49.6  | J | COG1544         | Ribosome-associated protein Y (PSrp-1)                                                                       |
| Bdor4328 CDS CDS        | 42.7  | 3.0  | 47.0  | J | COG0198         | Ribosomal protein L24                                                                                        |
| TS28Fae00079 CDS CDS    | 40.0  | 3.0  | 44.1  | J | COG1544         | Ribosome-associated protein Y (PSrp-1)                                                                       |
| Pmer3079 CDS CDS        | 13.3  | 1.0  | 44.1  | J | COG0198         | Ribosomal protein L24                                                                                        |
| Bhan0175 CDS CDS        | 13.2  | 1.0  | 43.5  | J | COG0050         | GTPases - translation elongation factors                                                                     |
| PRABACTJOHN2259 CDS CDS | 13.0  | 1.0  | 43.0  | J | COG0185         | Ribosomal protein S19                                                                                        |
| Brvfor1738 CDS CDS      | 13.0  | 1.0  | 43.0  | J | COG0080         | Ribosomal protein L11                                                                                        |
| Msmi740893 CDS CDS      | 21.0  | 1.7  | 41.6  | J | COG5256         | Translation elongation factor EF-1alpha (GTPase)                                                             |
| TS28Col0566 CDS CDS     | 25.0  | 2.0  | 41.3  | J | COG0211         | Ribosomal protein L27                                                                                        |
| Bste2309 CDS CDS        | 12.0  | 1.0  | 39.8  | J | COG0081         | Ribosomal protein L1                                                                                         |
| BactD13588 CDS CDS      | 6.0   | 0.5  | 39.7  | J | COG0621         | 2-methylthioadenine synthetase                                                                               |
| Bdor0499 CDS CDS        | 11.3  | 1.0  | 37.5  | J | COG0238         | Ribosomal protein S18                                                                                        |
| TS29Met0472 CDS CDS     | 6.0   | 0.5  | 37.2  | J | COG0081         | Ribosomal protein L1                                                                                         |
| TS28Fae05977 CDS CDS    | 11.0  | 1.0  | 36.4  | J | COG2265         | SAM-dependent methyltransferases related to tRNA (uracil-5-)-methyltransferase                               |
| Bdor4347 CDS CDS        | 32.8  | 3.0  | 36.1  | J | COG0244         | Ribosomal protein L10                                                                                        |
| TS28Fae13722 CDS CDS    | 5.3   | 0.5  | 35.3  | J | COG0097         | Ribosomal protein L6P/L9E                                                                                    |
| TS28Ali2084 CDS CDS     | 94.0  | 9.0  | 34.5  | J | COG0198         | Ribosomal protein L24                                                                                        |
| Msmi750793 CDS CDS      | 17.0  | 1.7  | 33.7  | J | COG5256         | Translation elongation factor EF-1alpha (GTPase)                                                             |
| Casp0953 CDS CDS        | 5.0   | 0.5  | 33.1  | J | COG0094         | Ribosomal protein L5                                                                                         |
| Pmer3073 CDS CDS        | 9.8   | 1.0  | 32.5  | J | COG0089         | Ribosomal protein L23                                                                                        |
| BactD14454 CDS CDS      | 9.8   | 1.0  | 32.5  | J | COG0185         | Ribosomal protein S19                                                                                        |
| ShigspsD90005 CDS CDS   | 3.3   | 0.3  | 32.2  | J | COG0050         | GTPases - translation elongation factors                                                                     |
| Bdor4333 CDS CDS        | 66.2  | 6.8  | 32.0  | J | COG0092         | Ribosomal protein S3                                                                                         |
| TS29Bac11453 CDS CDS    | 14.0  | 1.5  | 30.9  | J | COG0050         | GTPases - translation elongation factors                                                                     |
| Cbol1942 CDS CDS        | 9.0   | 1.0  | 29.8  | J | COG1544         | Ribosome-associated protein Y (PSrp-1)                                                                       |
| TS29Rum12035 CDS CDS    | 27.0  | 3.0  | 29.8  | J | COG1544         | Ribosome-associated protein Y (PSrp-1)                                                                       |
| TS28Rum07032 CDS CDS    | 9.0   | 1.0  | 29.8  | J | COG0480         | Translation elongation factors (GTPases)                                                                     |
| TS29Col1050 CDS CDS     | 9.0   | 1.0  | 29.8  | J | COG0441         | Threonyl-tRNA synthetase                                                                                     |
| TS29Fae10022 CDS CDS    | 4.5   | 0.5  | 29.8  | J | COG0290         | Translation initiation factor 3 (IF-3)                                                                       |
| RintL10535 CDS CDS      | 9.0   | 1.0  | 29.8  | J | COG0255         | Ribosomal protein L29                                                                                        |
| Dfor0762 CDS CDS        | 9.0   | 1.0  | 29.8  | J | COG0251 COG1357 | Putative translation initiation inhibitor, yjgF family/Uncharacterized low-complexity proteins               |
| Acol2340 CDS CDS        | 9.0   | 1.0  | 29.8  | J | COG0093         | Ribosomal protein L14                                                                                        |
| RintL10530 CDS CDS      | 9.0   | 1.0  | 29.8  | J | COG0089         | Ribosomal protein L23                                                                                        |
| TS29Col0074 CDS CDS     | 8.5   | 1.0  | 28.2  | J | COG0050         | GTPases - translation elongation factors                                                                     |
| Svar1484 CDS CDS        | 8.5   | 1.0  | 28.1  | J | COG0087         | Ribosomal protein L3                                                                                         |
| Bste1207 CDS CDS        | 8.5   | 1.0  | 27.9  | J | COG0227         | Ribosomal protein L28                                                                                        |
| ShigspsD91105 CDS CDS   | 8.3   | 1.0  | 27.6  | J | COG0495         | Leucyl-tRNA synthetase                                                                                       |
| TS28Ali2087 CDS CDS     | 75.0  | 9.0  | 27.6  | J | COG0089         | Ribosomal protein L23                                                                                        |
| Pmer1931 CDS CDS        | 49.8  | 6.0  | 27.5  | J | COG0008 COG0064 | Glutamyl- and glutamyl-tRNA synthetases/Asp-tRNAAsn/Glu-tRNA Gln amidotransferase B subunit (PET112 homolog) |
| Aput1563 CDS CDS        | 107.5 | 13.0 | 27.3  | J | COG0052         | Ribosomal protein S2                                                                                         |
| TS28Eub1333 CDS CDS     | 8.0   | 1.0  | 26.5  | J | COG0267         | Ribosomal protein L33                                                                                        |
| Bcap3099 CDS CDS        | 8.0   | 1.0  | 26.5  | J | COG0267         | Ribosomal protein L33                                                                                        |
| Acol2349 CDS CDS        | 8.0   | 1.0  | 26.5  | J | COG0088         | Ribosomal protein L4                                                                                         |
| Cste0994 CDS CDS        | 7.6   | 1.0  | 25.1  | J | COG0050         | GTPases - translation elongation factors                                                                     |
| TS29Rum19669 CDS CDS    | 15.0  | 2.0  | 24.8  | J | COG0564         | Pseudouridylate synthases, 23S RNA-specific                                                                  |
| Bdor4315 CDS CDS        | 7.5   | 1.0  | 24.8  | J | COG0203         | Ribosomal protein L17                                                                                        |
| BactD14438 CDS CDS      | 2.5   | 0.3  | 24.7  | J | COG0050         | GTPases - translation elongation factors                                                                     |
| Bxyl1699 CDS CDS        | 2.5   | 0.3  | 24.7  | J | COG0050         | GTPases - translation elongation factors                                                                     |
| TS29Bac03348 CDS CDS    | 2.5   | 0.3  | 24.7  | J | COG0050         | GTPases - translation elongation factors                                                                     |
| BactD14457 CDS CDS      | 5.0   | 0.7  | 24.6  | J | COG0197         | Ribosomal protein L16/L10E                                                                                   |
| Bxyl1678 CDS CDS        | 5.0   | 0.7  | 24.6  | J | COG0197         | Ribosomal protein L16/L10E                                                                                   |
| TS29Bac09453 CDS CDS    | 5.0   | 0.7  | 24.6  | J | COG0197         | Ribosomal protein L16/L10E                                                                                   |
| Bste2295 CDS CDS        | 14.8  | 2.0  | 24.5  | J | COG0185         | Ribosomal protein S19                                                                                        |
| Hfil1189 CDS CDS        | 7.3   | 1.0  | 24.3  | J | COG0480         | Translation elongation factors (GTPases)                                                                     |
| Robe1737 CDS CDS        | 7.3   | 1.0  | 24.3  | J | COG0255         | Ribosomal protein L29                                                                                        |
| Bfin1190 CDS CDS        | 2.4   | 0.3  | 23.9  | J | COG0539         | Ribosomal protein S1                                                                                         |
| CspSS20706 CDS CDS      | 14.0  | 2.0  | 23.1  | J | COG1534         | Predicted RNA-binding protein containing KH domain, possibly ribosomal protein                               |
| Casp3349 CDS CDS        | 7.0   | 1.0  | 23.1  | J | COG1190         | Lysyl-tRNA synthetase (class II)                                                                             |
| Pmer3139 CDS CDS        | 3.5   | 0.5  | 23.1  | J | COG0617 COG0618 | tRNA nucleotidyltransferase/poly(A) polymerase/Exopolyphosphate-related proteins                             |

|                        |       |      |      |   |                 |                                                                                                           |
|------------------------|-------|------|------|---|-----------------|-----------------------------------------------------------------------------------------------------------|
| Ccom0845 CDS CDS       | 7.0   | 1.0  | 23.1 | J | COG0480         | Translation elongation factors (GTPases)                                                                  |
| Acol0660 CDS CDS       | 7.0   | 1.0  | 23.1 | J | COG0335         | Ribosomal protein L19                                                                                     |
| TS29Rum00793 CDS CDS   | 7.0   | 1.0  | 23.1 | J | COG0251 COG1357 | Putative translation initiation inhibitor, yjgF family/Uncharacterized low-complexity proteins            |
| Rtor1396 CDS CDS       | 14.0  | 2.0  | 23.1 | J | COG0228         | Ribosomal protein S16                                                                                     |
| Robe1841 CDS CDS       | 2.3   | 0.3  | 23.1 | J | COG0184         | Ribosomal protein S15P/S13E                                                                               |
| TS29Rum10660 CDS CDS   | 2.3   | 0.3  | 23.1 | J | COG0184         | Ribosomal protein S15P/S13E                                                                               |
| Msmi750618 CDS CDS     | 1.8   | 0.3  | 23.1 | J | COG0130         | Pseudouridine synthase                                                                                    |
| TS28Fae11044 CDS CDS   | 7.0   | 1.0  | 23.1 | J | COG0048         | Ribosomal protein S12                                                                                     |
| Acol0410 CDS CDS       | 7.0   | 1.0  | 23.1 | J | COG0012         | Predicted GTPase, probable translation factor                                                             |
| TS29Rum15321 CDS CDS   | 6.8   | 1.0  | 22.6 | J | COG2868         | Predicted ribosomal protein                                                                               |
| BactD12583 CDS CDS     | 5.3   | 0.8  | 22.5 | J | COG0423         | Glycyl-tRNA synthetase (class II)                                                                         |
| Bste2951 CDS CDS       | 17.0  | 2.5  | 22.5 | J | COG0324         | tRNA delta(2)-isopentenylpyrophosphate transferase                                                        |
| TS29Bac02529 CDS CDS   | 6.8   | 1.0  | 22.5 | J | COG0238         | Ribosomal protein S18                                                                                     |
| Msmi751413 CDS CDS     | 3.0   | 0.5  | 22.0 | J | COG0081         | Ribosomal protein L1                                                                                      |
| Brvfor3831 CDS CDS     | 5.5   | 0.8  | 21.8 | J | COG0050         | GTPases - translation elongation factors                                                                  |
| TS29Rum17981 CDS CDS   | 13.0  | 2.0  | 21.5 | J | COG0244         | Ribosomal protein L10                                                                                     |
| TS29Clo0293 CDS CDS    | 13.0  | 2.0  | 21.5 | J | COG0231         | Translation elongation factor P (EF-P)/translation initiation factor 5A (eIF-5A)                          |
| Pmer0609 CDS CDS       | 6.5   | 1.0  | 21.5 | J | COG0216         | Protein chain release factor A                                                                            |
| Robe1728 CDS CDS       | 6.5   | 1.0  | 21.5 | J | COG0051         | Ribosomal protein S10                                                                                     |
| Cste1464 CDS CDS       | 19.0  | 3.0  | 20.9 | J | COG0525         | Valyl-tRNA synthetase                                                                                     |
| Bdor4329 CDS CDS       | 12.5  | 2.0  | 20.7 | J | COG0093         | Ribosomal protein L14                                                                                     |
| TS29Bac09458 CDS CDS   | 3.1   | 0.5  | 20.6 | J | COG0090         | Ribosomal protein L2                                                                                      |
| TS29Rum13729 CDS CDS   | 6.2   | 1.0  | 20.4 | J | COG0098         | Ribosomal protein S5                                                                                      |
| Msmi750610 CDS CDS     | 3.0   | 0.5  | 20.1 | J | COG0522         | Ribosomal protein S4 and related proteins                                                                 |
| Bste2299 CDS CDS       | 18.2  | 3.0  | 20.0 | J | COG0087         | Ribosomal protein L3                                                                                      |
| Msmi740284 CDS CDS     | 5.0   | 0.8  | 19.8 | J | COG1537 COG1503 | Predicted RNA-binding proteins/Peptide chain release factor 1 (eRF1)                                      |
| TS28Rum03141 CDS CDS   | 2.0   | 0.3  | 19.8 | J | COG0525         | Valyl-tRNA synthetase                                                                                     |
| Msmi741116 CDS CDS     | 9.0   | 1.5  | 19.8 | J | COG0016         | Phenylalanyl-tRNA synthetase alpha subunit                                                                |
| Bste2069 CDS CDS       | 12.0  | 2.0  | 19.8 | J | COG0532         | Translation initiation factor 2 (IF-2; GTPase)                                                            |
| TS29Fae00886 CDS CDS   | 6.0   | 1.0  | 19.8 | J | COG0482         | Predicted tRNA(5-methylaminomethyl-2-thiouridylate) methyltransferase, contains the PP-loop ATPase domain |
| TS28Rum09388 CDS CDS   | 6.0   | 1.0  | 19.8 | J | COG0230         | Ribosomal protein L34                                                                                     |
| Cspo2314 CDS CDS       | 6.0   | 1.0  | 19.8 | J | COG0228         | Ribosomal protein S16                                                                                     |
| Acol2320 CDS CDS       | 6.0   | 1.0  | 19.8 | J | COG0203         | Ribosomal protein L17                                                                                     |
| Bcap2263 CDS CDS       | 6.0   | 1.0  | 19.8 | J | COG0186         | Ribosomal protein S17                                                                                     |
| TS29Met0854 CDS CDS    | 1.2   | 0.2  | 19.8 | J | COG0092         | Ribosomal protein S3                                                                                      |
| Msmi750643 CDS CDS     | 1.5   | 0.3  | 19.8 | J | COG0091         | Ribosomal protein L22                                                                                     |
| FpraM2121572 CDS CDS   | 3.0   | 0.5  | 19.8 | J | COG0018         | Arginyl-tRNA synthetase                                                                                   |
| TS29Fae08149 CDS CDS   | 3.0   | 0.5  | 19.8 | J | COG0018         | Arginyl-tRNA synthetase                                                                                   |
| BactD14441 CDS CDS     | 3.0   | 0.5  | 19.8 | J | COG0081         | Ribosomal protein L1                                                                                      |
| Bxvl1695 CDS CDS       | 3.0   | 0.5  | 19.8 | J | COG0081         | Ribosomal protein L1                                                                                      |
| Bdor4338 CDS CDS       | 38.0  | 6.5  | 19.3 | J | COG0088         | Ribosomal protein L4                                                                                      |
| TS28Fae22827 CDS CDS   | 5.8   | 1.0  | 19.3 | J | COG0098         | Ribosomal protein S5                                                                                      |
| TS28Met0720 CDS CDS    | 14.5  | 2.5  | 19.2 | J | COG2139         | Ribosomal protein L21E                                                                                    |
| Msmi751271 CDS CDS     | 14.5  | 2.5  | 19.2 | J | COG2139         | Ribosomal protein L21E                                                                                    |
| Bste2294 CDS CDS       | 17.2  | 3.0  | 18.9 | J | COG0091         | Ribosomal protein L22                                                                                     |
| Bdor4351 CDS CDS       | 40.1  | 7.0  | 18.9 | J | COG0050         | GTPases - translation elongation factors                                                                  |
| TS29Met0155 CDS CDS    | 5.7   | 1.0  | 18.8 | J | COG1534 COG2023 | Predicted RNA-binding protein containing KH domain, possibly ribosomal protein/RNase P subunit RPR2       |
| RintL10533 CDS CDS     | 22.7  | 4.0  | 18.8 | J | COG0091         | Ribosomal protein L22                                                                                     |
| Bdor4341 CDS CDS       | 17.0  | 3.0  | 18.7 | J | COG0049         | Ribosomal protein S7                                                                                      |
| TS28Ali0073 CDS CDS    | 72.0  | 13.0 | 18.3 | J | COG0291         | Ribosomal protein L35                                                                                     |
| Bdor4336 CDS CDS       | 38.5  | 7.0  | 18.2 | J | COG0090         | Ribosomal protein L2                                                                                      |
| BactD11765 CDS CDS     | 1.8   | 0.3  | 18.2 | J | COG2265         | SAM-dependent methyltransferases related to tRNA (uracil-5-)-methyltransferase                            |
| Msmi740277 CDS CDS     | 2.8   | 0.5  | 18.2 | J | COG1549         | Queuine tRNA-ribosyltransferases, contain PUA domain                                                      |
| TS28RumUnc0514 CDS CDS | 22.0  | 4.0  | 18.2 | J | COG1544         | Ribosome-associated protein Y (PSrp-1)                                                                    |
| Eeli2048 CDS CDS       | 11.0  | 2.0  | 18.2 | J | COG0292         | Ribosomal protein L20                                                                                     |
| TS28Col1433 CDS CDS    | 5.5   | 1.0  | 18.2 | J | COG0257         | Ribosomal protein L36                                                                                     |
| TS29Bac12092 CDS CDS   | 2.6   | 0.5  | 17.1 | J | COG0052         | Ribosomal protein S2                                                                                      |
| TS28Ali0299 CDS CDS    | 164.0 | 32.0 | 16.9 | J | COG0480         | Translation elongation factors (GTPases)                                                                  |
| CspM6212581 CDS CDS    | 20.3  | 4.0  | 16.8 | J | COG0050         | GTPases - translation elongation factors                                                                  |
| RintL11448 CDS CDS     | 5.0   | 1.0  | 16.5 | J | COG1544         | Ribosome-associated protein Y (PSrp-1)                                                                    |
| TS29Rum16455 CDS CDS   | 5.0   | 1.0  | 16.5 | J | COG1490         | D-Tyr-tRNA <sup>Tyr</sup> deacylase                                                                       |
| Cste1248 CDS CDS       | 5.0   | 1.0  | 16.5 | J | COG1206         | NAD(FAD)-utilizing enzyme possibly involved in translation                                                |
| Cnex2441 CDS CDS       | 5.0   | 1.0  | 16.5 | J | COG0828         | Ribosomal protein S21                                                                                     |
| TS29LacUnc019 CDS CDS  | 5.0   | 1.0  | 16.5 | J | COG0231         | Translation elongation factor P (EF-P)/translation initiation factor 5A (eIF-5A)                          |
| TS29Rum01821 CDS CDS   | 1.7   | 0.3  | 16.5 | J | COG0144         | tRNA and rRNA cytosine-C5-methylases                                                                      |
| Csci2161 CDS CDS       | 5.0   | 1.0  | 16.5 | J | COG0094         | Ribosomal protein L5                                                                                      |
| Cspo0074 CDS CDS       | 10.0  | 2.0  | 16.5 | J | COG0094         | Ribosomal protein L5                                                                                      |
| TS29Bac09450 CDS CDS   | 10.0  | 2.0  | 16.5 | J | COG0093         | Ribosomal protein L14                                                                                     |
| Brvfor4429 CDS CDS     | 5.0   | 1.0  | 16.5 | J | COG0092         | Ribosomal protein S3                                                                                      |
| Casp0965 CDS CDS       | 5.0   | 1.0  | 16.5 | J | COG0087         | Ribosomal protein L3                                                                                      |
| Cbol4252 CDS CDS       | 5.0   | 1.0  | 16.5 | J | COG0052         | Ribosomal protein S2                                                                                      |
| Chir2104 CDS CDS       | 5.0   | 1.0  | 16.5 | J | COG0050         | GTPases - translation elongation factors                                                                  |
| Brvfor0132 CDS CDS     | 5.0   | 1.0  | 16.5 | J | COG0008         | Glutamyl- and glutaminyl-tRNA synthetases                                                                 |
| Bege2625 CDS CDS       | 5.0   | 1.0  | 16.5 | J | COG0091         | Ribosomal protein L22                                                                                     |
| Bova0755 CDS CDS       | 2.5   | 0.5  | 16.5 | J | COG0050         | GTPases - translation elongation factors                                                                  |
| TS29Bac08987 CDS CDS   | 2.5   | 0.5  | 16.4 | J | COG0172         | Seryl-tRNA synthetase                                                                                     |
| Bxvl3163 CDS CDS       | 2.5   | 0.5  | 16.4 | J | COG0172         | Seryl-tRNA synthetase                                                                                     |
| Msmi750990 CDS CDS     | 5.7   | 1.2  | 16.0 | J | COG0064         | Asp-tRNA <sup>Asn</sup> /Glu-tRNA <sup>Gln</sup> amidotransferase B subunit (PET112 homolog)              |
| Bege2623 CDS CDS       | 24.0  | 5.0  | 15.9 | J | COG0197         | Ribosomal protein L16/L10E                                                                                |
| Msmi751252 CDS CDS     | 3.6   | 0.8  | 15.8 | J | COG1736         | Diphthamide synthase subunit DPH2                                                                         |
| Bste2716 CDS CDS       | 62.0  | 13.0 | 15.8 | J | COG0480         | Translation elongation factors (GTPases)                                                                  |
| Msmi751432 CDS CDS     | 3.2   | 0.7  | 15.7 | J | COG2888         | Predicted Zn-ribon RNA-binding protein with a function in translation                                     |

|                         |       |      |      |   |                 |                                                                                              |
|-------------------------|-------|------|------|---|-----------------|----------------------------------------------------------------------------------------------|
| TS28Met1650 CDS/CDS     | 3.2   | 0.7  | 15.7 | J | COG2888         | Predicted Zn-ribbon RNA-binding protein with a function in translation                       |
| Msmi740247 CDS/CDS      | 3.2   | 0.7  | 15.7 | J | COG2888         | Predicted Zn-ribbon RNA-binding protein with a function in translation                       |
| Pmer0391 CDS/CDS        | 9.5   | 2.0  | 15.7 | J | COG0290         | Translation initiation factor 3 (IF-3)                                                       |
| Bdor0226 CDS/CDS        | 23.6  | 5.0  | 15.6 | J | COG0102         | Ribosomal protein L13                                                                        |
| Bste0410 CDS/CDS        | 23.5  | 5.0  | 15.5 | J | COG0228         | Ribosomal protein S16                                                                        |
| Msmi750689 CDS/CDS      | 7.0   | 1.5  | 15.4 | J | COG1798         | Diphthamide biosynthesis methyltransferase                                                   |
| Bdor4319 CDS/CDS        | 16.7  | 3.7  | 15.0 | J | COG0024         | Methionine aminopeptidase                                                                    |
| Msmi750171 CDS/CDS      | 1.5   | 0.3  | 14.9 | J | COG2125         | Ribosomal protein S6E (S10)                                                                  |
| Msmi741546 CDS/CDS      | 1.5   | 0.3  | 14.9 | J | COG2125         | Ribosomal protein S6E (S10)                                                                  |
| Msmi750306 CDS/CDS      | 1.5   | 0.3  | 14.9 | J | COG1514         | 2'-5' RNA ligase                                                                             |
| RintL12917 CDS/CDS      | 9.0   | 2.0  | 14.9 | J | COG0532         | Translation initiation factor 2 (IF-2; GTPase)                                               |
| Msmi740571 CDS/CDS      | 3.0   | 0.7  | 14.9 | J | COG0441         | Threonyl-tRNA synthetase                                                                     |
| TS29Col1654 CDS/CDS     | 9.0   | 2.0  | 14.9 | J | COG0256         | Ribosomal protein L18                                                                        |
| TS29Bac05406 CDS/CDS    | 3.0   | 0.7  | 14.9 | J | COG0173         | Aspartyl-tRNA synthetase                                                                     |
| Bxyl1668 CDS/CDS        | 4.5   | 1.0  | 14.9 | J | COG0098         | Ribosomal protein S5                                                                         |
| BactD14465 CDS/CDS      | 4.5   | 1.0  | 14.9 | J | COG0098         | Ribosomal protein S5                                                                         |
| TS28Ali1617 CDS/CDS     | 40.0  | 9.0  | 14.7 | J | COG0290         | Translation initiation factor 3 (IF-3)                                                       |
| TS28Ali2091 CDS/CDS     | 62.0  | 14.0 | 14.6 | J | COG0049         | Ribosomal protein S7                                                                         |
| Msmi740553 CDS/CDS      | 2.7   | 0.6  | 14.6 | J | COG0018         | Arginyl-tRNA synthetase                                                                      |
| Bste2272 CDS/CDS        | 11.0  | 2.5  | 14.6 | J | COG0203         | Ribosomal protein L17                                                                        |
| TS28Fae20651 CDS/CDS    | 8.8   | 2.0  | 14.5 | J | COG0049         | Ribosomal protein S7                                                                         |
| TS29Rum18959 CDS/CDS    | 13.0  | 3.0  | 14.3 | J | COG0480         | Translation elongation factors (GTPases)                                                     |
| BactD14440 CDS/CDS      | 5.8   | 1.3  | 14.3 | J | COG0080         | Ribosomal protein L11                                                                        |
| Bxyl1696 CDS/CDS        | 5.8   | 1.3  | 14.3 | J | COG0080         | Ribosomal protein L11                                                                        |
| Msmi750206 CDS/CDS      | 2.2   | 0.5  | 14.2 | J | COG0721         | Asp-tRNA <sup>Asn</sup> /Glu-tRNA <sup>Gln</sup> amidotransferase C subunit                  |
| TS28Met0377 CDS/CDS     | 2.2   | 0.5  | 14.2 | J | COG0721         | Asp-tRNA <sup>Asn</sup> /Glu-tRNA <sup>Gln</sup> amidotransferase C subunit                  |
| Msmi741506 CDS/CDS      | 2.2   | 0.5  | 14.2 | J | COG0721         | Asp-tRNA <sup>Asn</sup> /Glu-tRNA <sup>Gln</sup> amidotransferase C subunit                  |
| TS28Fae22828 CDS/CDS    | 8.5   | 2.0  | 14.1 | J | COG0256         | Ribosomal protein L18                                                                        |
| Pmer1102 CDS/CDS        | 8.5   | 2.0  | 14.1 | J | COG0244         | Ribosomal protein L10                                                                        |
| Pmer1294 CDS/CDS        | 87.0  | 20.5 | 14.0 | J | COG0532         | Translation initiation factor 2 (IF-2; GTPase)                                               |
| Bdor4348 CDS/CDS        | 20.9  | 5.0  | 13.8 | J | COG0081         | Ribosomal protein L1                                                                         |
| Anu0546 CDS/CDS         | 54.0  | 13.0 | 13.7 | J | COG0090         | Ribosomal protein L2                                                                         |
| Rtor0546 CDS/CDS        | 8.2   | 2.0  | 13.6 | J | COG0050         | GTPases - translation elongation factors                                                     |
| TS29Bac04438 CDS/CDS    | 2.3   | 0.6  | 13.2 | J | COG0013         | Alanyl-tRNA synthetase                                                                       |
| Casp3434 CDS/CDS        | 4.0   | 1.0  | 13.2 | J | COG4108         | Peptide chain release factor RF-3                                                            |
| Pmer3258 CDS/CDS        | 12.0  | 3.0  | 13.2 | J | COG2264         | Ribosomal protein L11 methylase                                                              |
| Eeli1078 CDS/CDS        | 12.0  | 3.0  | 13.2 | J | COG1544         | Ribosome-associated protein Y (PSrp-1)                                                       |
| TS29Bif2532 CDS/CDS     | 1.0   | 0.3  | 13.2 | J | COG1544         | Ribosome-associated protein Y (PSrp-1)                                                       |
| Even0467 CDS/CDS        | 8.0   | 2.0  | 13.2 | J | COG1186         | Protein chain release factor B                                                               |
| CspL21674 CDS/CDS       | 8.0   | 2.0  | 13.2 | J | COG1185         | Polyribonucleotide nucleotidyltransferase (polynucleotide phosphorylase)                     |
| Robe1192 CDS/CDS        | 2.0   | 0.5  | 13.2 | J | COG0621         | 2-methylthioadenine synthetase                                                               |
| Svar1457 CDS/CDS        | 4.0   | 1.0  | 13.2 | J | COG0522         | Ribosomal protein S4 and related proteins                                                    |
| TS28Fae19635 CDS/CDS    | 8.0   | 2.0  | 13.2 | J | COG0267         | Ribosomal protein L33                                                                        |
| Pmer3228 CDS/CDS        | 4.0   | 1.0  | 13.2 | J | COG0254         | Ribosomal protein L31                                                                        |
| Cbo15373 CDS/CDS        | 4.0   | 1.0  | 13.2 | J | COG0233         | Ribosome recycling factor                                                                    |
| Bdor1113 CDS/CDS        | 8.0   | 2.0  | 13.2 | J | COG0231         | Translation elongation factor P (EF-P)/translation initiation factor 5A (eIF-5A)             |
| Eeli1561 CDS/CDS        | 8.0   | 2.0  | 13.2 | J | COG0231         | Translation elongation factor P (EF-P)/translation initiation factor 5A (eIF-5A)             |
| TS29Bac11681 CDS/CDS    | 4.0   | 1.0  | 13.2 | J | COG0203         | Ribosomal protein L17                                                                        |
| Bova4074 CDS/CDS        | 2.0   | 0.5  | 13.2 | J | COG0193         | Peptidyl-tRNA hydrolase                                                                      |
| BactD24017 CDS/CDS      | 2.0   | 0.5  | 13.2 | J | COG0193         | Peptidyl-tRNA hydrolase                                                                      |
| Rumhyd2310 CDS/CDS      | 4.0   | 1.0  | 13.2 | J | COG0173         | Aspartyl-tRNA synthetase                                                                     |
| Dfor1285 CDS/CDS        | 4.0   | 1.0  | 13.2 | J | COG0094         | Ribosomal protein L5                                                                         |
| Casp0959 CDS/CDS        | 10.0  | 2.5  | 13.2 | J | COG0092         | Ribosomal protein S3                                                                         |
| PRABACT10HN2262 CDS/CDS | 4.0   | 1.0  | 13.2 | J | COG0088         | Ribosomal protein L4                                                                         |
| Ehal0879 CDS/CDS        | 4.0   | 1.0  | 13.2 | J | COG0081         | Ribosomal protein L1                                                                         |
| Acac2532 CDS/CDS        | 4.0   | 1.0  | 13.2 | J | COG0064         | Asp-tRNA <sup>Asn</sup> /Glu-tRNA <sup>Gln</sup> amidotransferase B subunit (PET112 homolog) |
| Rena2644 CDS/CDS        | 2.0   | 0.5  | 13.2 | J | COG0042         | tRNA-dihydrouridine synthase                                                                 |
| TS29Bac10366 CDS/CDS    | 2.0   | 0.5  | 13.2 | J | COG0024         | Methionine aminopeptidase                                                                    |
| CspM6213067 CDS/CDS     | 6.0   | 1.5  | 13.2 | J | COG0008         | Glutamyl- and glutaminyl-tRNA synthetases                                                    |
| Msmi751268 CDS/CDS      | 10.6  | 2.7  | 13.1 | J | COG0030         | Dimethyladenosine transferase (rRNA methylation)                                             |
| BactD11536 CDS/CDS      | 3.9   | 1.0  | 12.9 | J | COG1187         | 16S rRNA uridine-516 pseudouridylylase and related pseudouridylylase synthetases             |
| TS28Col1447 CDS/CDS     | 39.0  | 10.0 | 12.9 | J | COG0198         | Ribosomal protein L24                                                                        |
| CspSS23028 CDS/CDS      | 15.5  | 4.0  | 12.8 | J | COG1544         | Ribosome-associated protein Y (PSrp-1)                                                       |
| TS29Bac07466 CDS/CDS    | 6.5   | 1.7  | 12.8 | J | COG0532         | Translation initiation factor 2 (IF-2; GTPase)                                               |
| TS28Col1171 CDS/CDS     | 27.0  | 7.0  | 12.8 | J | COG0049         | Ribosomal protein S7                                                                         |
| Msmi740134 CDS/CDS      | 2.9   | 0.8  | 12.7 | J | COG0423         | Glycyl-tRNA synthetase (class II)                                                            |
| TS28Ali1618 CDS/CDS     | 159.0 | 42.0 | 12.5 | J | COG0441         | Threonyl-tRNA synthetase                                                                     |
| TS29Bac02937 CDS/CDS    | 1.3   | 0.3  | 12.4 | J | COG0180         | Trvptophanyl-tRNA synthetase                                                                 |
| TS29Bac10265 CDS/CDS    | 2.5   | 0.7  | 12.4 | J | COG0564         | Pseudouridylylase synthetases. 23S RNA-specific                                              |
| Pmer1139 CDS/CDS        | 11.2  | 3.0  | 12.3 | J | COG0480         | Translation elongation factors (GTPases)                                                     |
| Bdor0693 CDS/CDS        | 22.0  | 6.0  | 12.1 | J | COG0290         | Translation initiation factor 3 (IF-3)                                                       |
| TS28Rum10022 CDS/CDS    | 11.0  | 3.0  | 12.1 | J | COG0228         | Ribosomal protein S16                                                                        |
| Csci2146 CDS/CDS        | 3.7   | 1.0  | 12.1 | J | COG0100         | Ribosomal protein S11                                                                        |
| Bega0034 CDS/CDS        | 7.3   | 2.0  | 12.1 | J | COG0052         | Ribosomal protein S2                                                                         |
| TS28Clo09186 CDS/CDS    | 22.0  | 6.0  | 12.1 | J | COG0050         | GTPases - translation elongation factors                                                     |
| TS28Fae02145 CDS/CDS    | 40.0  | 11.0 | 12.0 | J | COG0324         | tRNA delta(2)-isopentenylpyrophosphate transferase                                           |
| Msmi750560 CDS/CDS      | 9.0   | 2.5  | 11.9 | J | COG0016         | Phenylalanyl-tRNA synthetase alpha subunit                                                   |
| TS29Bac05585 CDS/CDS    | 3.6   | 1.0  | 11.8 | J | COG0267         | Ribosomal protein L33                                                                        |
| Msmi750050 CDS/CDS      | 3.3   | 0.9  | 11.7 | J | COG1632         | Ribosomal protein L15E                                                                       |
| Bste2298 CDS/CDS        | 17.5  | 5.0  | 11.6 | J | COG0088         | Ribosomal protein L4                                                                         |
| Bdor1364 CDS/CDS        | 3.5   | 1.0  | 11.6 | J | COG3743 COG0261 | Uncharacterized conserved protein/Ribosomal protein L21                                      |
| Msmi740761 CDS/CDS      | 1.8   | 0.5  | 11.6 | J | COG1867         | N2,N2-dimethylguanosine tRNA methyltransferase                                               |
| Msmi740991 CDS/CDS      | 7.0   | 2.0  | 11.6 | J | COG1798         | Diphthamide biosynthesis methyltransferase                                                   |
| TS28Dor0970 CDS/CDS     | 7.0   | 2.0  | 11.6 | J | COG1534         | Predicted RNA-binding protein containing KH domain, possibly ribosomal protein               |

|                          |      |       |      |   |                 |                                                                                                                                                                                       |
|--------------------------|------|-------|------|---|-----------------|---------------------------------------------------------------------------------------------------------------------------------------------------------------------------------------|
| TS28Fae06298 CDS CDS     | 14.0 | 4.0   | 11.6 | J | COG0441         | Threonyl-tRNA synthetase                                                                                                                                                              |
| Casp6313 CDS CDS         | 7.0  | 2.0   | 11.6 | J | COG0222         | Ribosomal protein L7/L12                                                                                                                                                              |
| Rtor2165 CDS CDS         | 7.0  | 2.0   | 11.6 | J | COG0184         | Ribosomal protein S15P/S13E                                                                                                                                                           |
| Cnex0801 CDS CDS         | 7.0  | 2.0   | 11.6 | J | COG0098         | Ribosomal protein S5                                                                                                                                                                  |
| Bhan0424 CDS CDS         | 7.0  | 2.0   | 11.6 | J | COG0096         | Ribosomal protein S8                                                                                                                                                                  |
| Cste1403 CDS CDS         | 3.5  | 1.0   | 11.6 | J | COG0060         | Isoleucyl-tRNA synthetase                                                                                                                                                             |
| Bste0953 CDS CDS         | 3.5  | 1.0   | 11.6 | J | COG0024         | Methionine aminopeptidase                                                                                                                                                             |
| Bdor2412 CDS CDS         | 17.0 | 5.0   | 11.2 | J | COG0621         | 2-methylthioadenine synthetase                                                                                                                                                        |
| TS28Bac6839 CDS CDS      | 23.7 | 7.0   | 11.2 | J | COG0186         | Ribosomal protein S17                                                                                                                                                                 |
| Cnex0780 CDS CDS         | 4.5  | 1.3   | 11.2 | J | COG0480         | Translation elongation factors (GTPases)                                                                                                                                              |
| TS28Fae12903 CDS CDS     | 13.5 | 4.0   | 11.2 | J | COG0050         | GTPases - translation elongation factors                                                                                                                                              |
| Msmi751329 CDS CDS       | 4.2  | 1.3   | 11.1 | J | COG2117         | Predicted subunit of tRNA(5-methylaminomethyl-2-thiouridylate) methyltransferase, contains the PP-loop ATPase domain                                                                  |
| BactD20036 CDS CDS       | 1.7  | 0.5   | 11.0 | J | COG0081         | Ribosomal protein L1                                                                                                                                                                  |
| TS28Fae21704 CDS CDS     | 5.0  | 1.5   | 11.0 | J | COG1490         | D-Tyr-tRNA <sup>Tyr</sup> deacylase                                                                                                                                                   |
| Dfor1540 CDS CDS         | 10.0 | 3.0   | 11.0 | J | COG0227         | Ribosomal protein L28                                                                                                                                                                 |
| Aco12347 CDS CDS         | 10.0 | 3.0   | 11.0 | J | COG0090         | Ribosomal protein L2                                                                                                                                                                  |
| PRABACT JOHN3551 CDS CDS | 10.0 | 3.0   | 11.0 | J | COG0050         | GTPases - translation elongation factors                                                                                                                                              |
| Bste2293 CDS CDS         | 13.2 | 4.0   | 10.9 | J | COG0092         | Ribosomal protein S3                                                                                                                                                                  |
| Bdor0461 CDS CDS         | 11.5 | 3.5   | 10.9 | J | COG0009         | Putative translation factor (SUA5)                                                                                                                                                    |
| TS28Ali0403 CDS CDS      | 49.0 | 15.0  | 10.8 | J | COG0222         | Ribosomal protein L7/L12                                                                                                                                                              |
| Dlon2187 CDS CDS         | 13.0 | 4.0   | 10.7 | J | COG2868         | Predicted ribosomal protein                                                                                                                                                           |
| Rbro1252 CDS CDS         | 6.5  | 2.0   | 10.7 | J | COG0495         | Leucyl-tRNA synthetase                                                                                                                                                                |
| TS29Fae01100 CDS CDS     | 3.3  | 1.0   | 10.7 | J | COG0215         | Cysteinyl-tRNA synthetase                                                                                                                                                             |
| Pmer1043 CDS CDS         | 13.0 | 4.0   | 10.7 | J | COG0024         | Methionine aminopeptidase                                                                                                                                                             |
| Svar0370 CDS CDS         | 9.8  | 3.0   | 10.7 | J | COG0017         | Aspartyl/asparaginyl-tRNA synthetases                                                                                                                                                 |
| Bdor0222 CDS CDS         | 26.0 | 8.0   | 10.7 | J | COG0017         | Aspartyl/asparaginyl-tRNA synthetases                                                                                                                                                 |
| TS29Dor2153 CDS CDS      | 9.7  | 3.0   | 10.7 | J | COG0091         | Ribosomal protein L22                                                                                                                                                                 |
| Aco11128 CDS CDS         | 9.7  | 3.0   | 10.7 | J | COG0050         | GTPases - translation elongation factors                                                                                                                                              |
| Bdor0692 CDS CDS         | 25.7 | 8.0   | 10.6 | J | COG0441         | Threonyl-tRNA synthetase                                                                                                                                                              |
| TS29Rum21010 CDS CDS     | 12.8 | 4.0   | 10.6 | J | COG0087         | Ribosomal protein L3                                                                                                                                                                  |
| Svar0550 CDS CDS         | 20.7 | 6.5   | 10.5 | J | COG0050         | GTPases - translation elongation factors                                                                                                                                              |
| Bege1340 CDS CDS         | 3.2  | 1.0   | 10.5 | J | COG1825         | Ribosomal protein L25 (general stress protein Ctc)                                                                                                                                    |
| Bdor1425 CDS CDS         | 6.3  | 2.0   | 10.5 | J | COG0324         | tRNA delta(2)-isopentenylpyrophosphate transferase                                                                                                                                    |
| TS28Fae15518 CDS CDS     | 19.0 | 6.0   | 10.5 | J | COG0292         | Ribosomal protein L20                                                                                                                                                                 |
| TS28Par2565 CDS CDS      | 9.5  | 3.0   | 10.5 | J | COG0290         | Translation initiation factor 3 (IF-3)                                                                                                                                                |
| Msmi750796 CDS CDS       | 3.2  | 1.0   | 10.5 | J | COG0048         | Ribosomal protein S12                                                                                                                                                                 |
| Acac2828 CDS CDS         | 9.3  | 3.0   | 10.3 | J | COG0050         | GTPases - translation elongation factors                                                                                                                                              |
| Beap2652 CDS CDS         | 33.9 | 11.0  | 10.2 | J | COG0050         | GTPases - translation elongation factors                                                                                                                                              |
| TS28Fae10272 CDS CDS     | 17.3 | 5.7   | 10.1 | J | COG0238         | Ribosomal protein S18                                                                                                                                                                 |
| TS28Eub6198 CDS CDS      | 3.8  | 127.0 | 0.1  | J | COG0495         | Leucyl-tRNA synthetase                                                                                                                                                                |
| TS28Bif4388 CDS CDS      | 0.3  | 8.3   | 0.1  | J | COG0030         | Dimethyladenosine transferase (rRNA methylation)                                                                                                                                      |
| TS29Bif0456 CDS CDS      | 0.3  | 8.3   | 0.1  | J | COG0030         | Dimethyladenosine transferase (rRNA methylation)                                                                                                                                      |
| TS28Eub8888 CDS CDS      | 1.0  | 33.5  | 0.1  | J | COG0231         | Translation elongation factor P (EF-P)/translation initiation factor 5A (eIF-5A)                                                                                                      |
| TS29Bif2967 CDS CDS      | 0.5  | 16.8  | 0.1  | J | COG0013         | Alanyl-tRNA synthetase                                                                                                                                                                |
| TS29Bif1236 CDS CDS      | 0.3  | 11.2  | 0.1  | J | COG0215         | Cysteinyl-tRNA synthetase                                                                                                                                                             |
| TS28Clo1330 CDS CDS      | 5.0  | 168.0 | 0.1  | J | COG0012         | Predicted GTPase, probable translation factor                                                                                                                                         |
| TS28Fae15574 CDS CDS     | 2.0  | 67.3  | 0.1  | J | COG0480         | Translation elongation factors (GTPases)                                                                                                                                              |
| TS28Eub8322 CDS CDS      | 1.0  | 34.5  | 0.1  | J | COG0100         | Ribosomal protein S11                                                                                                                                                                 |
| TS29Bif3639 CDS CDS      | 0.3  | 11.5  | 0.1  | J | COG0018         | Arginyl-tRNA synthetase                                                                                                                                                               |
| TS28Clo00521 CDS CDS     | 6.0  | 208.0 | 0.1  | J | COG0008         | Glutamyl- and glutaminyl-tRNA synthetases                                                                                                                                             |
| TS28Rum02927 CDS CDS     | 0.5  | 17.5  | 0.1  | J | COG0495         | Leucyl-tRNA synthetase                                                                                                                                                                |
| TS28RumUnc1650 CDS CDS   | 2.0  | 70.0  | 0.1  | J | COG0480         | Translation elongation factors (GTPases)                                                                                                                                              |
| TS28Eub5095 CDS CDS      | 2.0  | 70.0  | 0.1  | J | COG0008 COG0064 | Glutamyl- and glutaminyl-tRNA synthetases/Asp-tRNA <sup>Asn</sup> /Glu-tRNA <sup>Gln</sup> amidotransferase B subunit (PET112 homolog)                                                |
| TS28Eub8628 CDS CDS      | 3.0  | 106.0 | 0.1  | J | COG0173         | Aspartyl-tRNA synthetase                                                                                                                                                              |
| TS28Clo00811 CDS CDS     | 3.0  | 106.0 | 0.1  | J | COG0052         | Ribosomal protein S2                                                                                                                                                                  |
| Bpse0181 CDS CDS         | 0.1  | 4.0   | 0.1  | J | COG0089         | Ribosomal protein L23                                                                                                                                                                 |
| TS29Bif1363 CDS CDS      | 0.1  | 4.0   | 0.1  | J | COG0089         | Ribosomal protein L23                                                                                                                                                                 |
| TS28Bif3992 CDS CDS      | 0.1  | 4.0   | 0.1  | J | COG0089         | Ribosomal protein L23                                                                                                                                                                 |
| TS28Clo01294 CDS CDS     | 6.0  | 217.0 | 0.1  | J | COG0143         | Methionyl-tRNA synthetase                                                                                                                                                             |
| TS28Fae18279 CDS CDS     | 2.0  | 72.5  | 0.1  | J | COG0621         | 2-methylthioadenine synthetase                                                                                                                                                        |
| Robe2299 CDS CDS         | 0.5  | 18.5  | 0.1  | J | COG1236 COG1782 | Predicted exonuclease of the beta-lactamase fold involved in RNA processing Predicted metal-dependent RNase, consists of a metallo-beta-lactamase domain and an RNA-binding KH domain |
| TS28Met0468 CDS CDS      | 1.5  | 56.2  | 0.1  | J | COG0060         | Isoleucyl-tRNA synthetase                                                                                                                                                             |
| TS28Fae01901 CDS CDS     | 0.5  | 19.0  | 0.1  | J | COG0532         | Translation initiation factor 2 (IF-2; GTPase)                                                                                                                                        |
| TS29Rum17008 CDS CDS     | 2.0  | 78.0  | 0.1  | J | COG0480         | Translation elongation factors (GTPases)                                                                                                                                              |
| TS28Eub8311 CDS CDS      | 0.5  | 19.5  | 0.1  | J | COG0256         | Ribosomal protein L18                                                                                                                                                                 |
| TS28Bac7651 CDS CDS      | 0.5  | 19.5  | 0.1  | J | COG0180         | Trvptophanyl-tRNA synthetase                                                                                                                                                          |
| Dfor0369 CDS CDS         | 1.0  | 39.8  | 0.1  | J | COG1190         | Lysyl-tRNA synthetase (class II)                                                                                                                                                      |
| TS29Fae02030 CDS CDS     | 0.5  | 20.0  | 0.1  | J | COG0143         | Methionyl-tRNA synthetase                                                                                                                                                             |
| TS28Fae14972 CDS CDS     | 0.2  | 8.0   | 0.1  | J | COG0052         | Ribosomal protein S2                                                                                                                                                                  |
| TS28Eub4460 CDS CDS      | 1.0  | 40.0  | 0.1  | J | COG0012         | Predicted GTPase, probable translation factor                                                                                                                                         |
| TS28Fae20208 CDS CDS     | 1.2  | 47.0  | 0.1  | J | COG0264         | Translation elongation factor Ts                                                                                                                                                      |
| TS28Clo0359 CDS CDS      | 1.0  | 40.8  | 0.1  | J | COG0162         | Tyrosyl-tRNA synthetase                                                                                                                                                               |
| Bpse1096 CDS CDS         | 0.3  | 13.8  | 0.1  | J | COG0008         | Glutamyl- and glutaminyl-tRNA synthetases                                                                                                                                             |
| TS29Bif1200 CDS CDS      | 0.3  | 13.8  | 0.1  | J | COG0008         | Glutamyl- and glutaminyl-tRNA synthetases                                                                                                                                             |
| TS28Rum05971 CDS CDS     | 1.0  | 42.0  | 0.1  | J | COG0525         | Valyl-tRNA synthetase                                                                                                                                                                 |
| TS28Eub8765 CDS CDS      | 2.0  | 84.0  | 0.1  | J | COG0008 COG0064 | Glutamyl- and glutaminyl-tRNA synthetases/Asp-tRNA <sup>Asn</sup> /Glu-tRNA <sup>Gln</sup> amidotransferase B subunit (PET112 homolog)                                                |
| TS28Met1508 CDS CDS      | 0.3  | 11.0  | 0.1  | J | COG1746         | tRNA nucleotidyltransferase (CCA-adding enzyme)                                                                                                                                       |
| RintL10531 CDS CDS       | 0.3  | 11.0  | 0.1  | J | COG0090         | Ribosomal protein L2                                                                                                                                                                  |
| TS28Clo00476 CDS CDS     | 7.0  | 310.0 | 0.1  | J | COG1185         | Polyribonucleotide nucleotidyltransferase (polynucleotide phosphorylase)                                                                                                              |
| TS29Fae06399 CDS CDS     | 0.4  | 19.0  | 0.1  | J | COG0441         | Threonyl-tRNA synthetase                                                                                                                                                              |
| TS28Fae10189 CDS CDS     | 1.0  | 44.5  | 0.1  | J | COG4108         | Peptide chain release factor RF-3                                                                                                                                                     |
| TS29Rum16762 CDS CDS     | 0.5  | 22.5  | 0.1  | J | COG0566         | rRNA methylases                                                                                                                                                                       |
| TS28Clo00686 CDS CDS     | 4.0  | 180.0 | 0.1  | J | COG0124         | Histidyl-tRNA synthetase                                                                                                                                                              |



|                      |      |       |      |     |                         |                                                                                                                                            |
|----------------------|------|-------|------|-----|-------------------------|--------------------------------------------------------------------------------------------------------------------------------------------|
| TS28Eub8321 CDS CDS  | 0.7  | 31.5  | 0.1  | J   | COG0099                 | Ribosomal protein S13                                                                                                                      |
| TS28Fae14040 CDS CDS | 0.3  | 15.0  | 0.1  | J   | COG0621                 | 2-methylthioadenine synthetase                                                                                                             |
| TS28Fae01826 CDS CDS | 1.2  | 52.5  | 0.1  | J   | COG0480                 | Translation elongation factors (GTPases)                                                                                                   |
| TS28Eub8298 CDS CDS  | 1.0  | 45.5  | 0.1  | J   | COG0087                 | Ribosomal protein L3                                                                                                                       |
| Clep2095 CDS CDS     | 0.5  | 23.0  | 0.1  | J   | COG0480                 | Translation elongation factors (GTPases)                                                                                                   |
| TS28Fae18978 CDS CDS | 0.5  | 23.0  | 0.1  | J   | COG0042                 | tRNA-dihydrouridine synthase                                                                                                               |
| TS28Rum14152 CDS CDS | 0.5  | 23.5  | 0.1  | J   | COG0566                 | rRNA methylases                                                                                                                            |
| TS28Fae18276 CDS CDS | 1.0  | 48.0  | 0.1  | J   | COG2890 COG3872         | Methylase of polypeptide chain release factors Predicted metal-dependent enzyme                                                            |
| TS28Eub8308 CDS CDS  | 0.5  | 24.0  | 0.1  | J   | COG0094                 | Ribosomal protein L5                                                                                                                       |
| TS28Clo01032 CDS CDS | 5.0  | 245.0 | 0.1  | J   | COG0173                 | Asparlyl-tRNA synthetase                                                                                                                   |
| TS28Clo00842 CDS CDS | 3.0  | 148.0 | 0.1  | J   | COG0809                 | S-adenosylmethionine:tRNA-ribosyltransferase-isomerase (queuine synthetase)                                                                |
| TS28Eub7262 CDS CDS  | 1.5  | 74.5  | 0.1  | J   | COG0042                 | tRNA-dihydrouridine synthase                                                                                                               |
| Dlon0199 CDS CDS     | 0.2  | 10.0  | 0.1  | J   | COG0099                 | Ribosomal protein S13                                                                                                                      |
| TS28Clo01445 CDS CDS | 2.0  | 100.0 | 0.1  | J   | COG0024                 | Methionine aminopeptidase                                                                                                                  |
| TS29Rum13769 CDS CDS | 2.0  | 102.0 | 0.1  | J   | COG0525                 | Valyl-tRNA synthetase                                                                                                                      |
| TS28Met0433 CDS CDS  | 0.3  | 17.2  | 0.1  | J   | COG1498                 | Protein implicated in ribosomal biogenesis. Nop56p homolog                                                                                 |
| TS28Clo0590 CDS CDS  | 1.0  | 52.0  | 0.1  | J   | COG0495                 | Leucyl-tRNA synthetase                                                                                                                     |
| TS28Fae11125 CDS CDS | 0.4  | 23.0  | 0.1  | J   | COG0441                 | Threonyl-tRNA synthetase                                                                                                                   |
| TS28Eub7783 CDS CDS  | 1.5  | 80.5  | 0.1  | J   | COG1185                 | Polyribonucleotide nucleotidyltransferase (polynucleotide phosphorylase)                                                                   |
| Robe2865 CDS CDS     | 0.5  | 27.0  | 0.1  | J   | COG4108                 | Peptide chain release factor RF-3                                                                                                          |
| TS28Bac6270 CDS CDS  | 0.5  | 27.0  | 0.1  | J   | COG2265                 | SAM-dependent methyltransferases related to tRNA (uracil-5-)-methyltransferase                                                             |
| TS28Clo00307 CDS CDS | 0.5  | 27.8  | 0.1  | J   | COG0018                 | Arginyl-tRNA synthetase                                                                                                                    |
| TS28Eub5337 CDS CDS  | 0.5  | 28.5  | 0.1  | J   | COG1187                 | 16S rRNA uridine-516 pseudouridylate synthase and related pseudouridylate synthases                                                        |
| TS28Clo01505 CDS CDS | 3.0  | 173.0 | 0.1  | J   | COG0162                 | Tyrosyl-tRNA synthetase                                                                                                                    |
| RintL13310 CDS CDS   | 1.6  | 97.5  | 0.1  | J   | COG0480                 | Translation elongation factors (GTPases)                                                                                                   |
| TS28Bif0821 CDS CDS  | 0.2  | 12.1  | 0.1  | J   | COG0200                 | Ribosomal protein L15                                                                                                                      |
| TS28Bif1069 CDS CDS  | 0.7  | 41.3  | 0.1  | J   | COG0060                 | Isoleucyl-tRNA synthetase                                                                                                                  |
| TS29Bif2797 CDS CDS  | 0.2  | 10.5  | 0.1  | J   | COG0441                 | Threonyl-tRNA synthetase                                                                                                                   |
| TS28Eub8644 CDS CDS  | 0.5  | 31.5  | 0.1  | J   | COG0018                 | Arginyl-tRNA synthetase                                                                                                                    |
| TS28Clo01346 CDS CDS | 2.0  | 130.0 | 0.1  | J   | COG0216                 | Protein chain release factor A                                                                                                             |
| TS28Clo01430 CDS CDS | 1.0  | 65.0  | 0.1  | J   | COG0197                 | Ribosomal protein L16/L10E                                                                                                                 |
| TS28Clo01494 CDS CDS | 6.0  | 394.0 | 0.1  | J   | COG0495                 | Leucyl-tRNA synthetase                                                                                                                     |
| TS28Clo01639 CDS CDS | 1.0  | 66.0  | 0.1  | J   | COG0858                 | Ribosome-binding factor A                                                                                                                  |
| TS28Col1547 CDS CDS  | 0.3  | 22.0  | 0.1  | J   | COG0060                 | Isoleucyl-tRNA synthetase                                                                                                                  |
| TS28Fae14467 CDS CDS | 1.7  | 111.3 | 0.0  | J   | COG0441                 | Threonyl-tRNA synthetase                                                                                                                   |
| TS28Fae18605 CDS CDS | 0.5  | 33.5  | 0.0  | J   | COG0617                 | tRNA nucleotidyltransferase/polv(A) polymerase                                                                                             |
| TS28Fae17730 CDS CDS | 1.0  | 69.0  | 0.0  | J   | COG0564                 | Pseudouridylate synthases. 23S RNA-specific                                                                                                |
| TS28Fae18864 CDS CDS | 0.6  | 41.5  | 0.0  | J   | COG0143                 | Methionyl-tRNA synthetase                                                                                                                  |
| Svar2455 CDS CDS     | 3.1  | 213.6 | 0.0  | J   | COG0480                 | Translation elongation factors (GTPases)                                                                                                   |
| Ccom2219 CDS CDS     | 3.1  | 213.6 | 0.0  | J   | COG0480                 | Translation elongation factors (GTPases)                                                                                                   |
| Cmet2527 CDS CDS     | 3.1  | 213.6 | 0.0  | J   | COG0480                 | Translation elongation factors (GTPases)                                                                                                   |
| CspM6211935 CDS CDS  | 3.1  | 213.6 | 0.0  | J   | COG0480                 | Translation elongation factors (GTPases)                                                                                                   |
| TS28Eub7794 CDS CDS  | 0.3  | 23.7  | 0.0  | J   | COG0101                 | Pseudouridylate synthase                                                                                                                   |
| TS28Rum15742 CDS CDS | 1.0  | 72.3  | 0.0  | J   | COG0013                 | Alanyl-tRNA synthetase                                                                                                                     |
| TS28Clo00812 CDS CDS | 1.0  | 73.0  | 0.0  | J   | COG0292                 | Ribosomal protein L20                                                                                                                      |
| TS28Clo00518 CDS CDS | 6.0  | 438.0 | 0.0  | J   | COG0060                 | Isoleucyl-tRNA synthetase                                                                                                                  |
| TS28Fae18180 CDS CDS | 0.8  | 56.0  | 0.0  | J   | COG0215                 | Cysteinyl-tRNA synthetase                                                                                                                  |
| TS28Eub7522 CDS CDS  | 0.4  | 27.5  | 0.0  | J   | COG0049                 | Ribosomal protein S7                                                                                                                       |
| TS28Eub8301 CDS CDS  | 0.7  | 50.5  | 0.0  | J   | COG0090                 | Ribosomal protein L2                                                                                                                       |
| TS28Bif2061 CDS CDS  | 0.3  | 25.5  | 0.0  | J   | COG0018                 | Arginyl-tRNA synthetase                                                                                                                    |
| TS28Clo01458 CDS CDS | 1.0  | 81.0  | 0.0  | J   | COG0103                 | Ribosomal protein S9                                                                                                                       |
| TS29Bif1289 CDS CDS  | 0.6  | 49.8  | 0.0  | J   | COG1185                 | Polyribonucleotide nucleotidyltransferase (polynucleotide phosphorylase)                                                                   |
| TS29Fae00448 CDS CDS | 0.2  | 17.0  | 0.0  | J   | COG0052                 | Ribosomal protein S2                                                                                                                       |
| TS28Fae00276 CDS CDS | 0.4  | 37.0  | 0.0  | J   | COG0441                 | Threonyl-tRNA synthetase                                                                                                                   |
| TS28Clo00511 CDS CDS | 0.3  | 32.5  | 0.0  | J   | COG0172                 | Seryl-tRNA synthetase                                                                                                                      |
| Robe1736 CDS CDS     | 0.2  | 21.0  | 0.0  | J   | COG0197                 | Ribosomal protein L16/L10E                                                                                                                 |
| TS28Clo01287 CDS CDS | 1.0  | 108.0 | 0.0  | J   | COG0030                 | Dimethyladenosine transferase (rRNA methylation)                                                                                           |
| TS28Fae12522 CDS CDS | 1.0  | 110.0 | 0.0  | J   | COG4108                 | Peptide chain release factor RF-3                                                                                                          |
| TS28Bif3798 CDS CDS  | 0.3  | 37.3  | 0.0  | J   | COG0008                 | Glutamyl- and glutaminyl-tRNA synthetases                                                                                                  |
| TS29Rum21117 CDS CDS | 1.0  | 112.5 | 0.0  | J   | COG0143                 | Methionyl-tRNA synthetase                                                                                                                  |
| TS28Eub6374 CDS CDS  | 0.5  | 60.0  | 0.0  | J   | COG0564                 | Pseudouridylate synthases. 23S RNA-specific                                                                                                |
| TS28Eub6414 CDS CDS  | 0.5  | 62.0  | 0.0  | J   | COG0264                 | Translation elongation factor Ts                                                                                                           |
| TS28Fae20304 CDS CDS | 0.5  | 63.5  | 0.0  | J   | COG0144                 | tRNA and rRNA cytosine-C5-methylases                                                                                                       |
| TS28Fae05536 CDS CDS | 0.1  | 16.0  | 0.0  | J   | COG0197                 | Ribosomal protein L16/L10E                                                                                                                 |
| TS28Bif3842 CDS CDS  | 0.3  | 44.7  | 0.0  | J   | COG0215                 | Cysteinyl-tRNA synthetase                                                                                                                  |
| Rtor0519 CDS CDS     | 0.1  | 17.0  | 0.0  | J   | COG0197                 | Ribosomal protein L16/L10E                                                                                                                 |
| CspM6210039 CDS CDS  | 1.6  | 224.5 | 0.0  | J   | COG0480                 | Translation elongation factors (GTPases)                                                                                                   |
| TS28Fae20473 CDS CDS | 0.6  | 81.0  | 0.0  | J   | COG0480                 | Translation elongation factors (GTPases)                                                                                                   |
| TS28Eub4235 CDS CDS  | 0.5  | 72.0  | 0.0  | J   | COG0621                 | 2-methylthioadenine synthetase                                                                                                             |
| TS29Rum19841 CDS CDS | 0.1  | 18.5  | 0.0  | J   | COG0264                 | Translation elongation factor Ts                                                                                                           |
| TS28Fae17629 CDS CDS | 0.5  | 80.5  | 0.0  | J   | COG0442                 | Prolyl-tRNA synthetase                                                                                                                     |
| TS28Eub3887 CDS CDS  | 0.5  | 86.0  | 0.0  | J   | COG0018                 | Arginyl-tRNA synthetase                                                                                                                    |
| TS28Fae16609 CDS CDS | 0.5  | 94.5  | 0.0  | J   | COG1190                 | Lysyl-tRNA synthetase (class II)                                                                                                           |
| TS28Rum00720 CDS CDS | 0.1  | 28.5  | 0.0  | J   | COG0264                 | Translation elongation factor Ts                                                                                                           |
| TS28Eub8794 CDS CDS  | 0.5  | 156.8 | 0.0  | J   | COG0060                 | Isoleucyl-tRNA synthetase                                                                                                                  |
| Buni3675 CDS CDS     | 0.0  | 18.5  | 0.0  | J   | COG0539                 | Ribosomal protein S1                                                                                                                       |
| Msmi740151 CDS CDS   | 8.3  | 2.2   | 12.6 | J C | COG1032 COG0060         | Fe-S oxidoreductase Isoleucyl-tRNA synthetase                                                                                              |
| Bste0247 CDS CDS     | 5.5  | 1.0   | 18.2 | J E | COG0252                 | L-asparaginase/archaeal Glu-tRNA <sup>Gln</sup> amidotransferase subunit D                                                                 |
| RintL13630 CDS CDS   | 4.0  | 1.0   | 13.2 | J H | COG0564 COG2320 COG0237 | Pseudouridylate synthases. 23S RNA-specific Uncharacterized conserved protein Dephospho-CoA kinase                                         |
| TS28Eub1354 CDS CDS  | 0.5  | 31.0  | 0.1  | J H | COG0564 COG2320 COG0237 | Pseudouridylate synthases. 23S RNA-specific Uncharacterized conserved protein Dephospho-CoA kinase                                         |
| Bdor0233 CDS CDS     | 21.5 | 4.0   | 17.8 | J I | COG0336 COG1211 COG0245 | tRNA-(guanine-N1)-methyltransferase 4-diphosphocytidyl-2-methyl-D-erythritol synthase 2C-methyl-D-erythritol 2,4-cyclodiphosphate synthase |

|                      |       |      |         |       |                         |                                                                                                                                                                   |
|----------------------|-------|------|---------|-------|-------------------------|-------------------------------------------------------------------------------------------------------------------------------------------------------------------|
| Msmi750862 CDS CDS   | 1.5   | 0.3  | 14.9    | J K   | COG0042 COG4008         | tRNA-dihydrouridine synthase Predicted metal-binding transcription factor                                                                                         |
| Pmer2803 CDS CDS     | 8.0   | 2.0  | 13.2    | J K F | COG0590 COG3070 COG0596 | Cytosine/adenosine deaminases Regulator of competence-specific genes Predicted hydrolases or acyltransferases (alpha/beta hydrolase superfamily)                  |
| Bste0101 CDS CDS     | 54.0  | 5.0  | 35.7    | J K L | COG0513                 | Superfamily II DNA and RNA helicases                                                                                                                              |
| Bdor1906 CDS CDS     | 74.0  | 11.0 | 22.2    | J K L | COG0513                 | Superfamily II DNA and RNA helicases                                                                                                                              |
| Bdor4353 CDS CDS     | 20.0  | 3.0  | 22.0    | J L   | COG4974 COG1544         | Site-specific recombinase XerD Ribosome-associated protein Y (PSrp-1)                                                                                             |
| Msmi751349 CDS CDS   | 3.5   | 1.0  | 11.6    | J L   | COG0494 COG1670 COG1194 | NTP pyrophosphohydrolases including oxidative damage repair enzymes Acetyltransferases, including N-acetylases of ribosomal proteins A/G-specific DNA glycosylase |
| Casp2902 CDS CDS     | 9.0   | 1.0  | 29.8    | J M I | COG0539 COG0761         | Ribosomal protein S1 Penicillin tolerance protein                                                                                                                 |
| Cbo11182 CDS CDS     | 10.0  | 2.0  | 16.5    | J M I | COG0539 COG0761         | Ribosomal protein S1 Penicillin tolerance protein                                                                                                                 |
| Csei1308 CDS CDS     | 2.3   | 0.5  | 15.4    | J M I | COG0539 COG0761         | Ribosomal protein S1 Penicillin tolerance protein                                                                                                                 |
| TS29Bac05982 CDS CDS | 335.8 | 1.0  | 1,110.4 | K     | COG1609                 | Transcriptional regulators                                                                                                                                        |
| Bxyl1779 CDS CDS     | 335.8 | 1.0  | 1,110.4 | K     | COG1609                 | Transcriptional regulators                                                                                                                                        |
| TS29Bac01524 CDS CDS | 88.0  | 2.0  | 145.5   | K     | COG1595                 | DNA-directed RNA polymerase specialized sigma subunit, sigma24 homolog                                                                                            |
| Bdor2086 CDS CDS     | 25.8  | 1.0  | 85.4    | K     | COG0782                 | Transcription elongation factor                                                                                                                                   |
| TS29Bac05143 CDS CDS | 12.9  | 0.5  | 85.0    | K     | COG1595                 | DNA-directed RNA polymerase specialized sigma subunit, sigma24 homolog                                                                                            |
| Bxyl0677 CDS CDS     | 12.9  | 0.5  | 85.0    | K     | COG1595                 | DNA-directed RNA polymerase specialized sigma subunit, sigma24 homolog                                                                                            |
| Msmi750333 CDS CDS   | 16.7  | 0.7  | 82.7    | K     | COG1396                 | Predicted transcriptional regulators                                                                                                                              |
| TS29Bac07839 CDS CDS | 23.3  | 1.0  | 77.2    | K     | COG1595                 | DNA-directed RNA polymerase specialized sigma subunit, sigma24 homolog                                                                                            |
| Robe1131 CDS CDS     | 10.5  | 0.5  | 69.4    | K     | COG1609                 | Transcriptional regulators                                                                                                                                        |
| Bdor2161 CDS CDS     | 18.2  | 1.0  | 60.1    | K     | COG1595                 | DNA-directed RNA polymerase specialized sigma subunit, sigma24 homolog                                                                                            |
| TS28Clo09855 CDS CDS | 129.5 | 8.0  | 53.5    | K     | COG2186                 | Transcriptional regulators                                                                                                                                        |
| CspSS20241 CDS CDS   | 7.5   | 0.5  | 49.6    | K     | COG1316                 | Transcriptional regulator                                                                                                                                         |
| Beap0565 CDS CDS     | 15.0  | 1.0  | 49.6    | K     | COG1278                 | Cold shock proteins                                                                                                                                               |
| Msmi751667 CDS CDS   | 3.8   | 0.3  | 49.6    | K     | COG0864                 | Predicted transcriptional regulators containing the CopG/Arc/MeT DNA-binding domain and a metal-binding domain                                                    |
| TS29Fae09412 CDS CDS | 22.0  | 1.5  | 48.5    | K     | COG1309                 | Transcriptional regulator                                                                                                                                         |
| Msmi741382 CDS CDS   | 16.7  | 1.2  | 47.2    | K     | COG1396                 | Predicted transcriptional regulators                                                                                                                              |
| TS29Bac02294 CDS CDS | 4.7   | 0.3  | 46.3    | K     | COG2183                 | Transcriptional accessory protein                                                                                                                                 |
| TS29Bac10393 CDS CDS | 14.0  | 1.0  | 46.3    | K     | COG1396                 | Predicted transcriptional regulators                                                                                                                              |
| Pmer2306 CDS CDS     | 13.5  | 1.0  | 44.6    | K     | COG1595                 | DNA-directed RNA polymerase specialized sigma subunit, sigma24 homolog                                                                                            |
| Bxyl2502 CDS CDS     | 6.6   | 0.5  | 43.9    | K     | COG0195                 | Transcription elongation factor                                                                                                                                   |
| Dfor2714 CDS CDS     | 26.0  | 2.0  | 43.0    | K     | COG1595                 | DNA-directed RNA polymerase specialized sigma subunit, sigma24 homolog                                                                                            |
| TS29Rum04536 CDS CDS | 6.5   | 0.5  | 43.0    | K     | COG1278                 | Cold shock proteins                                                                                                                                               |
| TS28Ali2350 CDS CDS  | 85.0  | 7.0  | 40.2    | K     | COG1278                 | Cold shock proteins                                                                                                                                               |
| Bdor4350 CDS CDS     | 23.5  | 2.0  | 38.9    | K     | COG0250                 | Transcription antiterminator                                                                                                                                      |
| Bxyl1906 CDS CDS     | 5.7   | 0.5  | 37.5    | K     | COG1595                 | DNA-directed RNA polymerase specialized sigma subunit, sigma24 homolog                                                                                            |
| BactD14212 CDS CDS   | 5.7   | 0.5  | 37.5    | K     | COG1595                 | DNA-directed RNA polymerase specialized sigma subunit, sigma24 homolog                                                                                            |
| Bxyl1519 CDS CDS     | 3.8   | 0.3  | 37.2    | K     | COG0782                 | Transcription elongation factor                                                                                                                                   |
| BactD11187 CDS CDS   | 3.8   | 0.3  | 37.2    | K     | COG0782                 | Transcription elongation factor                                                                                                                                   |
| Dfor0047 CDS CDS     | 11.0  | 1.0  | 36.4    | K     | COG1309                 | Transcriptional regulator                                                                                                                                         |
| TS28Rum03626 CDS CDS | 11.0  | 1.0  | 36.4    | K     | COG1278                 | Cold shock proteins                                                                                                                                               |
| DpigeATC0064 CDS CDS | 5.5   | 0.5  | 36.4    | K     | COG0086                 | DNA-directed RNA polymerase, beta' subunit/160 kD subunit                                                                                                         |
| Bste1692 CDS CDS     | 31.0  | 3.0  | 34.2    | K     | COG0782                 | Transcription elongation factor                                                                                                                                   |
| TS28Bac5364 CDS CDS  | 36.0  | 3.5  | 34.0    | K     | COG0557                 | Exoribonuclease R                                                                                                                                                 |
| Msmi751676 CDS CDS   | 2.5   | 0.3  | 33.1    | K     | COG1813                 | Predicted transcription factor, homolog of eukaryotic MBF1                                                                                                        |
| Msmi740181 CDS CDS   | 2.5   | 0.3  | 33.1    | K     | COG1813                 | Predicted transcription factor, homolog of eukaryotic MBF1                                                                                                        |
| TS29Clo4552 CDS CDS  | 10.0  | 1.0  | 33.1    | K     | COG1475                 | Predicted transcriptional regulators                                                                                                                              |
| TS29Fae10006 CDS CDS | 4.5   | 0.5  | 29.8    | K     | COG1316                 | Transcriptional regulator                                                                                                                                         |
| Cnex0068 CDS CDS     | 9.0   | 1.0  | 29.8    | K     | COG1158                 | Transcription termination factor                                                                                                                                  |
| Svar1456 CDS CDS     | 8.7   | 1.0  | 28.7    | K     | COG0202                 | DNA-directed RNA polymerase, alpha subunit/40 kD subunit                                                                                                          |
| TS29Fae08744 CDS CDS | 8.5   | 1.0  | 28.1    | K     | COG1316                 | Transcriptional regulator                                                                                                                                         |
| Ccom0288 CDS CDS     | 8.2   | 1.0  | 27.0    | K     | COG0085                 | DNA-directed RNA polymerase, beta subunit/140 kD subunit                                                                                                          |
| Eeli1311 CDS CDS     | 8.0   | 1.0  | 26.5    | K     | COG2740                 | Predicted nucleic-acid-binding protein implicated in transcription termination                                                                                    |
| Cnex2020 CDS CDS     | 8.0   | 1.0  | 26.5    | K     | COG1309                 | Transcriptional regulator                                                                                                                                         |
| TS29Bac03509 CDS CDS | 9.8   | 1.3  | 24.2    | K     | COG0782                 | Transcription elongation factor                                                                                                                                   |
| Ehal0174 CDS CDS     | 14.5  | 2.0  | 24.0    | K     | COG2002                 | Regulators of stationary/sporulation gene expression                                                                                                              |
| Begg3122 CDS CDS     | 14.5  | 2.0  | 24.0    | K     | COG1595                 | DNA-directed RNA polymerase specialized sigma subunit, sigma24 homolog                                                                                            |
| ShigsD90635 CDS CDS  | 7.2   | 1.0  | 23.7    | K     | COG2183                 | Transcriptional accessory protein                                                                                                                                 |
| TS29Fae01223 CDS CDS | 3.5   | 0.5  | 23.1    | K     | COG1609                 | Transcriptional regulators                                                                                                                                        |
| Bcap0224 CDS CDS     | 14.0  | 2.0  | 23.1    | K     | COG1508                 | DNA-directed RNA polymerase specialized sigma subunit, sigma54 homolog                                                                                            |
| TS28Fae01560 CDS CDS | 7.0   | 1.0  | 23.1    | K     | COG0250                 | Transcription antiterminator                                                                                                                                      |
| Aput0026 CDS CDS     | 7.0   | 1.0  | 23.1    | K     | COG0195                 | Transcription elongation factor                                                                                                                                   |
| Bdor3259 CDS CDS     | 13.7  | 2.0  | 22.6    | K     | COG1595                 | DNA-directed RNA polymerase specialized sigma subunit, sigma24 homolog                                                                                            |
| Pmer0927 CDS CDS     | 13.0  | 2.0  | 21.5    | K     | COG1595                 | DNA-directed RNA polymerase specialized sigma subunit, sigma24 homolog                                                                                            |
| Bste2068 CDS CDS     | 50.7  | 8.0  | 21.0    | K     | COG0195                 | Transcription elongation factor                                                                                                                                   |
| Bdor1383 CDS CDS     | 36.5  | 6.0  | 20.1    | K     | COG1595                 | DNA-directed RNA polymerase specialized sigma subunit, sigma24 homolog                                                                                            |
| Bdor4316 CDS CDS     | 24.3  | 4.0  | 20.1    | K     | COG0202                 | DNA-directed RNA polymerase, alpha subunit/40 kD subunit                                                                                                          |
| BactD12306 CDS CDS   | 3.0   | 0.5  | 19.8    | K     | COG2207                 | AraC-type DNA-binding domain-containing proteins                                                                                                                  |
| Bxyl4009 CDS CDS     | 3.0   | 0.5  | 19.8    | K     | COG2207                 | AraC-type DNA-binding domain-containing proteins                                                                                                                  |
| Eeli0895 CDS CDS     | 12.0  | 2.0  | 19.8    | K     | COG0789                 | Predicted transcriptional regulators                                                                                                                              |

|                         |       |      |      |   |         |                                                                                                                                       |
|-------------------------|-------|------|------|---|---------|---------------------------------------------------------------------------------------------------------------------------------------|
| Msmi751607 CDS CDS      | 7.4   | 1.3  | 19.4 | K | COG1405 | Transcription initiation factor TFIIIB, Brfl1 subunit/Transcription initiation factor TFIIIB                                          |
| Msmi740826 CDS CDS      | 5.8   | 1.0  | 19.0 | K | COG4008 | Predicted metal-binding transcription factor                                                                                          |
| Msmi750859 CDS CDS      | 5.8   | 1.0  | 19.0 | K | COG4008 | Predicted metal-binding transcription factor                                                                                          |
| TS28Met0214 CDS CDS     | 5.8   | 1.0  | 19.0 | K | COG4008 | Predicted metal-binding transcription factor                                                                                          |
| TS28Par1035 CDS CDS     | 23.0  | 4.0  | 19.0 | K | COG1595 | DNA-directed RNA polymerase specialized sigma subunit, sigma24 homolog                                                                |
| TS29Bac05314 CDS CDS    | 24.7  | 4.3  | 18.8 | K | COG2865 | Predicted transcriptional regulator containing an HTH domain and an uncharacterized domain shared with the mammalian protein Schlafen |
| TS28Ali2059 CDS CDS     | 51.0  | 9.0  | 18.7 | K | COG1595 | DNA-directed RNA polymerase specialized sigma subunit, sigma24 homolog                                                                |
| TS29Bac08379 CDS CDS    | 5.7   | 1.0  | 18.7 | K | COG1595 | DNA-directed RNA polymerase specialized sigma subunit, sigma24 homolog                                                                |
| ShigsnD90021 CDS CDS    | 16.0  | 2.8  | 18.7 | K | COG0086 | DNA-directed RNA polymerase, beta' subunit/160 kD subunit                                                                             |
| Bdor3071 CDS CDS        | 11.0  | 2.0  | 18.2 | K | COG2865 | Predicted transcriptional regulator containing an HTH domain and an uncharacterized domain shared with the mammalian protein Schlafen |
| TS28Fae17761 CDS CDS    | 5.5   | 1.0  | 18.2 | K | COG2740 | Predicted nucleic-acid-binding protein implicated in transcription termination                                                        |
| TS28Fae12290 CDS CDS    | 5.5   | 1.0  | 18.2 | K | COG1191 | DNA-directed RNA polymerase specialized sigma subunit                                                                                 |
| TS28Ali1895 CDS CDS     | 27.0  | 5.0  | 17.9 | K | COG2865 | Predicted transcriptional regulator containing an HTH domain and an uncharacterized domain shared with the mammalian protein Schlafen |
| BactD22269 CDS CDS      | 2.6   | 0.5  | 17.5 | K | COG0195 | Transcription elongation factor                                                                                                       |
| TS28Bac6888 CDS CDS     | 10.5  | 2.0  | 17.4 | K | COG1595 | DNA-directed RNA polymerase specialized sigma subunit, sigma24 homolog                                                                |
| TS29Fae01904 CDS CDS    | 2.5   | 0.5  | 16.5 | K | COG1609 | Transcriptional regulators                                                                                                            |
| PRABACTJOHN2766 CDS CDS | 5.0   | 1.0  | 16.5 | K | COG1595 | DNA-directed RNA polymerase specialized sigma subunit, sigma24 homolog                                                                |
| Bste1843 CDS CDS        | 5.0   | 1.0  | 16.5 | K | COG1522 | Transcriptional regulators                                                                                                            |
| Msmi741137 CDS CDS      | 2.5   | 0.5  | 16.5 | K | COG1497 | Predicted transcriptional regulator                                                                                                   |
| Rgna0821 CDS CDS        | 5.0   | 1.0  | 16.5 | K | COG1475 | Predicted transcriptional regulators                                                                                                  |
| Robe3022 CDS CDS        | 3.3   | 0.7  | 16.5 | K | COG1396 | Predicted transcriptional regulators                                                                                                  |
| TS29Rum09285 CDS CDS    | 3.3   | 0.7  | 16.5 | K | COG1396 | Predicted transcriptional regulators                                                                                                  |
| TS28Rum03046 CDS CDS    | 3.3   | 0.7  | 16.5 | K | COG1396 | Predicted transcriptional regulators                                                                                                  |
| Rlac0479 CDS CDS        | 10.0  | 2.0  | 16.5 | K | COG1309 | Transcriptional regulator                                                                                                             |
| Bdor3909 CDS CDS        | 10.0  | 2.0  | 16.5 | K | COG0454 | Histone acetyltransferase HPA2 and related acetyltransferases                                                                         |
| Acol2321 CDS CDS        | 5.0   | 1.0  | 16.5 | K | COG0202 | DNA-directed RNA polymerase, alpha subunit/40 kD subunit                                                                              |
| TS28Fae15750 CDS CDS    | 54.0  | 11.0 | 16.2 | K | COG1595 | DNA-directed RNA polymerase specialized sigma subunit, sigma24 homolog                                                                |
| TS28Ali0056 CDS CDS     | 116.0 | 24.0 | 16.0 | K | COG0195 | Transcription elongation factor                                                                                                       |
| Bdor1564 CDS CDS        | 19.0  | 4.0  | 15.7 | K | COG0571 | dsRNA-specific ribonuclease                                                                                                           |
| Robe0357 CDS CDS        | 1.5   | 0.3  | 14.9 | K | COG0557 | Exoribonuclease R                                                                                                                     |
| Pmer3286 CDS CDS        | 13.3  | 3.0  | 14.7 | K | COG1595 | DNA-directed RNA polymerase specialized sigma subunit, sigma24 homolog                                                                |
| Bdor3869 CDS CDS        | 28.0  | 6.3  | 14.6 | K | COG0568 | DNA-directed RNA polymerase, sigma subunit (sigma70/sigma32)                                                                          |
| Bste1880 CDS CDS        | 42.0  | 9.5  | 14.6 | K | COG0557 | Exoribonuclease R                                                                                                                     |
| Rtor1812 CDS CDS        | 6.5   | 1.5  | 14.3 | K | COG1278 | Cold shock proteins                                                                                                                   |
| Eeli2015 CDS CDS        | 17.0  | 4.0  | 14.1 | K | COG1609 | Transcriptional regulators                                                                                                            |
| Bste2311 CDS CDS        | 16.9  | 4.0  | 14.0 | K | COG0250 | Transcription antiterminator                                                                                                          |
| TS28Bac0277 CDS CDS     | 24.7  | 5.8  | 14.0 | K | COG2865 | Predicted transcriptional regulator containing an HTH domain and an uncharacterized domain shared with the mammalian protein Schlafen |
| Msmi750801 CDS CDS      | 1.4   | 0.3  | 13.9 | K | COG0085 | DNA-directed RNA polymerase, beta subunit/140 kD subunit                                                                              |
| TS28Col0260 CDS CDS     | 21.0  | 5.0  | 13.9 | K | COG1329 | Transcriptional regulators, similar to M. xanthus CarD                                                                                |
| Brvfor4357 CDS CDS      | 8.3   | 2.0  | 13.6 | K | COG0085 | DNA-directed RNA polymerase, beta subunit/140 kD subunit                                                                              |
| Cbol4254 CDS CDS        | 4.0   | 1.0  | 13.2 | K | COG4465 | Pleiotropic transcriptional repressor                                                                                                 |
| Bcap1353 CDS CDS        | 8.0   | 2.0  | 13.2 | K | COG2002 | Regulators of stationary/sporulation gene expression                                                                                  |
| Bdor0465 CDS CDS        | 16.0  | 4.0  | 13.2 | K | COG1595 | DNA-directed RNA polymerase specialized sigma subunit, sigma24 homolog                                                                |
| Pmer2898 CDS CDS        | 4.0   | 1.0  | 13.2 | K | COG1595 | DNA-directed RNA polymerase specialized sigma subunit, sigma24 homolog                                                                |
| TS28Rum07864 CDS CDS    | 8.0   | 2.0  | 13.2 | K | COG1475 | Predicted transcriptional regulators                                                                                                  |
| TS28Met1495 CDS CDS     | 16.7  | 4.2  | 13.2 | K | COG1396 | Predicted transcriptional regulators                                                                                                  |
| TS28Rum05858 CDS CDS    | 2.0   | 0.5  | 13.2 | K | COG1327 | Predicted transcriptional regulator, consists of a Zn-ribbon and ATP-cone domains                                                     |
| Bdor1990 CDS CDS        | 45.8  | 11.5 | 13.2 | K | COG0195 | Transcription elongation factor                                                                                                       |
| Bdor1066 CDS CDS        | 21.5  | 5.5  | 12.9 | K | COG1396 | Predicted transcriptional regulators                                                                                                  |
| TS29Bac07467 CDS CDS    | 9.6   | 2.5  | 12.7 | K | COG0195 | Transcription elongation factor                                                                                                       |
| TS29Bac00273 CDS CDS    | 7.5   | 2.0  | 12.4 | K | COG1595 | DNA-directed RNA polymerase specialized sigma subunit, sigma24 homolog                                                                |
| Csvm0386 CDS CDS        | 13.0  | 3.5  | 12.3 | K | COG0086 | DNA-directed RNA polymerase, beta' subunit/160 kD subunit                                                                             |
| TS28RumUnc1063 CDS CDS  | 11.0  | 3.0  | 12.1 | K | COG2002 | Regulators of stationary/sporulation gene expression                                                                                  |
| TS29Bac11640 CDS CDS    | 7.3   | 2.0  | 12.0 | K | COG1595 | DNA-directed RNA polymerase specialized sigma subunit, sigma24 homolog                                                                |
| Bsp1160241 CDS CDS      | 24.7  | 6.8  | 11.9 | K | COG2865 | Predicted transcriptional regulator containing an HTH domain and an uncharacterized domain shared with the mammalian protein Schlafen |
| Rtor0295 CDS CDS        | 9.0   | 2.5  | 11.9 | K | COG0250 | Transcription antiterminator                                                                                                          |
| TS28Rum08196 CDS CDS    | 9.0   | 2.5  | 11.9 | K | COG0250 | Transcription antiterminator                                                                                                          |
| Cnex0769 CDS CDS        | 9.0   | 2.5  | 11.9 | K | COG0085 | DNA-directed RNA polymerase, beta subunit/140 kD subunit                                                                              |
| TS29Bac00071 CDS CDS    | 6.5   | 1.8  | 11.7 | K | COG1595 | DNA-directed RNA polymerase specialized sigma subunit, sigma24 homolog                                                                |
| Pmer1341 CDS CDS        | 14.0  | 4.0  | 11.6 | K | COG2186 | Transcriptional regulators                                                                                                            |
| TS29Rum03472 CDS CDS    | 7.0   | 2.0  | 11.6 | K | COG1595 | DNA-directed RNA polymerase specialized sigma subunit, sigma24 homolog                                                                |
| TS29Bac02103 CDS CDS    | 3.5   | 1.0  | 11.6 | K | COG1521 | Putative transcriptional regulator, homolog of Bvg accessory factor                                                                   |
| TS29Rum01474 CDS CDS    | 7.0   | 2.0  | 11.6 | K | COG0454 | Histone acetyltransferase HPA2 and related acetyltransferases                                                                         |
| PRABACTJOHN3549 CDS CDS | 3.5   | 1.0  | 11.6 | K | COG0250 | Transcription antiterminator                                                                                                          |

|                          |         |       |         |      |                                 |                                                                                                                                                                                        |
|--------------------------|---------|-------|---------|------|---------------------------------|----------------------------------------------------------------------------------------------------------------------------------------------------------------------------------------|
| TS28Fae01245 CDS CDS     | 31.3    | 9.0   | 11.5    | K    | COG1595                         | DNA-directed RNA polymerase specialized sigma subunit, sigma24 homolog                                                                                                                 |
| TS28Fae16097 CDS CDS     | 34.0    | 10.0  | 11.2    | K    | COG1595                         | DNA-directed RNA polymerase specialized sigma subunit, sigma24 homolog                                                                                                                 |
| TS28Ali0401 CDS CDS      | 47.0    | 14.0  | 11.1    | K    | COG0085                         | DNA-directed RNA polymerase, beta subunit/140 kD subunit                                                                                                                               |
| TS28Fae18996 CDS CDS     | 23.3    | 7.0   | 11.0    | K    | COG1595                         | DNA-directed RNA polymerase specialized sigma subunit, sigma24 homolog                                                                                                                 |
| Bdor2598 CDS CDS         | 23.5    | 7.5   | 10.4    | K    | COG2207                         | AraC-type DNA-binding domain-containing proteins                                                                                                                                       |
| Msmi740269 CDS CDS       | 4.2     | 1.3   | 10.3    | K    | COG0250                         | Transcription antiterminator                                                                                                                                                           |
| Msmi751411 CDS CDS       | 4.2     | 1.3   | 10.3    | K    | COG0250                         | Transcription antiterminator                                                                                                                                                           |
| TS28Met1812 CDS CDS      | 4.2     | 1.3   | 10.3    | K    | COG0250                         | Transcription antiterminator                                                                                                                                                           |
| TS28Clo01324 CDS CDS     | 5.0     | 180.0 | 0.1     | K    | COG1475                         | Predicted transcriptional regulators                                                                                                                                                   |
| Csci3170 CDS CDS         | 0.1     | 3.3   | 0.1     | K    | COG1475                         | Predicted transcriptional regulators                                                                                                                                                   |
| Rrna3452 CDS CDS         | 0.1     | 3.3   | 0.1     | K    | COG1475                         | Predicted transcriptional regulators                                                                                                                                                   |
| Dlon0492 CDS CDS         | 0.1     | 3.3   | 0.1     | K    | COG1475                         | Predicted transcriptional regulators                                                                                                                                                   |
| Bhan1176 CDS CDS         | 0.1     | 3.3   | 0.1     | K    | COG1475                         | Predicted transcriptional regulators                                                                                                                                                   |
| Robe2629 CDS CDS         | 0.1     | 3.3   | 0.1     | K    | COG1475                         | Predicted transcriptional regulators                                                                                                                                                   |
| Edo10287 CDS CDS         | 0.1     | 3.3   | 0.1     | K    | COG1475                         | Predicted transcriptional regulators                                                                                                                                                   |
| Clep2040 CDS CDS         | 0.1     | 3.3   | 0.1     | K    | COG1475                         | Predicted transcriptional regulators                                                                                                                                                   |
| TS28Rum14530 CDS CDS     | 1.3     | 49.7  | 0.1     | K    | COG0085                         | DNA-directed RNA polymerase, beta subunit/140 kD subunit                                                                                                                               |
| TS28Clo01665 CDS CDS     | 1.0     | 38.0  | 0.1     | K    | COG0640                         | Predicted transcriptional regulators                                                                                                                                                   |
| Cnex1994 CDS CDS         | 0.1     | 3.5   | 0.1     | K    | COG1475                         | Predicted transcriptional regulators                                                                                                                                                   |
| Acae2279 CDS CDS         | 0.1     | 3.5   | 0.1     | K    | COG1475                         | Predicted transcriptional regulators                                                                                                                                                   |
| Buni3361 CDS CDS         | 0.2     | 6.5   | 0.1     | K    | COG0568                         | DNA-directed RNA polymerase, sigma subunit (sigma70/sigma32)                                                                                                                           |
| Bdor2070 CDS CDS         | 0.3     | 13.0  | 0.1     | K    | COG1508                         | DNA-directed RNA polymerase specialized sigma subunit, sigma54 homolog                                                                                                                 |
| TS28Rum14083 CDS CDS     | 3.0     | 117.7 | 0.1     | K    | COG0085                         | DNA-directed RNA polymerase, beta subunit/140 kD subunit                                                                                                                               |
| TS28Eub4980 CDS CDS      | 1.0     | 39.3  | 0.1     | K    | COG0846                         | NAD-dependent protein deacetylases, SIR2 family                                                                                                                                        |
| TS28Clo04900 CDS CDS     | 0.5     | 20.0  | 0.1     | K    | COG1508                         | DNA-directed RNA polymerase specialized sigma subunit, sigma54 homolog                                                                                                                 |
| TS29Rum11457 CDS CDS     | 1.0     | 42.0  | 0.1     | K    | COG2909                         | ATP-dependent transcriptional regulator                                                                                                                                                |
| CspS21223 CDS CDS        | 1.0     | 43.0  | 0.1     | K    | COG0086                         | DNA-directed RNA polymerase, beta' subunit/160 kD subunit                                                                                                                              |
| Buni3486 CDS CDS         | 0.2     | 7.3   | 0.1     | K    | COG1158                         | Transcription termination factor                                                                                                                                                       |
| TS28Bac0626 CDS CDS      | 0.2     | 7.3   | 0.1     | K    | COG1158                         | Transcription termination factor                                                                                                                                                       |
| TS28Eub0737 CDS CDS      | 1.5     | 67.5  | 0.1     | K    | COG1475                         | Predicted transcriptional regulators                                                                                                                                                   |
| TS28Clo01364 CDS CDS     | 1.0     | 45.0  | 0.1     | K    | COG1278                         | Cold shock proteins                                                                                                                                                                    |
| TS28Fae20871 CDS CDS     | 1.9     | 90.0  | 0.1     | K    | COG0086                         | DNA-directed RNA polymerase, beta' subunit/160 kD subunit                                                                                                                              |
| TS28Eub0252 CDS CDS      | 1.0     | 48.0  | 0.1     | K    | COG2932                         | Predicted transcriptional regulator                                                                                                                                                    |
| TS28Rum00876 CDS CDS     | 1.5     | 77.8  | 0.1     | K    | COG0086                         | DNA-directed RNA polymerase, beta' subunit/160 kD subunit                                                                                                                              |
| Svar0544 CDS CDS         | 0.5     | 26.0  | 0.1     | K    | COG0086                         | DNA-directed RNA polymerase, beta' subunit/160 kD subunit                                                                                                                              |
| TS28Clo01682 CDS CDS     | 4.0     | 213.0 | 0.1     | K    | COG0568                         | DNA-directed RNA polymerase, sigma subunit (sigma70/sigma32)                                                                                                                           |
| TS29Fae00048 CDS CDS     | 0.5     | 27.5  | 0.1     | K    | COG1475                         | Predicted transcriptional regulators                                                                                                                                                   |
| TS28Fae18142 CDS CDS     | 0.5     | 27.5  | 0.1     | K    | COG1475                         | Predicted transcriptional regulators                                                                                                                                                   |
| TS28Bif0033 CDS CDS      | 0.5     | 28.5  | 0.1     | K    | COG1609                         | Transcriptional regulators                                                                                                                                                             |
| TS29Fae02482 CDS CDS     | 0.3     | 20.0  | 0.1     | K    | COG0571                         | dsRNA-specific ribonuclease                                                                                                                                                            |
| TS29Eub1018 CDS CDS      | 0.5     | 32.0  | 0.1     | K    | COG0085                         | DNA-directed RNA polymerase, beta subunit/140 kD subunit                                                                                                                               |
| Dlon1164 CDS CDS         | 1.0     | 65.0  | 0.1     | K    | COG0085                         | DNA-directed RNA polymerase, beta subunit/140 kD subunit                                                                                                                               |
| TS28Fae21885 CDS CDS     | 0.5     | 33.0  | 0.1     | K    | COG1475                         | Predicted transcriptional regulators                                                                                                                                                   |
| TS28Clo01311 CDS CDS     | 1.0     | 68.0  | 0.0     | K    | COG4903                         | Genetic competence transcription factor                                                                                                                                                |
| TS29Rum00333 CDS CDS     | 0.5     | 37.5  | 0.0     | K    | COG2186                         | Transcriptional regulators                                                                                                                                                             |
| TS28Fae20342 CDS CDS     | 1.0     | 75.0  | 0.0     | K    | COG0557                         | Exoribonuclease R                                                                                                                                                                      |
| TS28Clo01295 CDS CDS     | 1.0     | 90.0  | 0.0     | K    | COG2002                         | Regulators of stationary/sporulation gene expression                                                                                                                                   |
| TS28Bac5730 CDS CDS      | 0.3     | 31.0  | 0.0     | K    | COG1508                         | DNA-directed RNA polymerase specialized sigma subunit, sigma54 homolog                                                                                                                 |
| TS28Clo00678 CDS CDS     | 2.0     | 200.0 | 0.0     | K    | COG0568                         | DNA-directed RNA polymerase, sigma subunit (sigma70/sigma32)                                                                                                                           |
| TS28Clo01326 CDS CDS     | 1.0     | 103.0 | 0.0     | K    | COG1475                         | Predicted transcriptional regulators                                                                                                                                                   |
| TS28Fae01168 CDS CDS     | 0.3     | 36.0  | 0.0     | K    | COG0571                         | dsRNA-specific ribonuclease                                                                                                                                                            |
| TS28Clo01450 CDS CDS     | 1.0     | 137.0 | 0.0     | K    | COG0202                         | DNA-directed RNA polymerase, alpha subunit/40 kD subunit                                                                                                                               |
| TS28Clo01633 CDS CDS     | 1.0     | 166.0 | 0.0     | K    | COG1396                         | Predicted transcriptional regulators                                                                                                                                                   |
| TS29Fae06507 CDS CDS     | 0.5     | 111.5 | 0.0     | K    | COG1475                         | Predicted transcriptional regulators                                                                                                                                                   |
| Rbro0292 CDS CDS         | 0.5     | 116.5 | 0.0     | K    | COG0085                         | DNA-directed RNA polymerase, beta subunit/140 kD subunit                                                                                                                               |
| TS28Clo01205 CDS CDS     | 3.0     | 116.0 | 0.1     | KIB  | COG1242 COG1243                 | Predicted Fe-S oxidoreductase/Histone acetyltransferase                                                                                                                                |
| Dlon1710 CDS CDS         | 2,092.5 | 2.0   | 3,459.9 | KIG  | COG1940                         | Transcriptional regulator/sugar kinase                                                                                                                                                 |
| Robe3270 CDS CDS         | 11.0    | 0.5   | 72.8    | KIG  | COG1349                         | Transcriptional regulators of sugar metabolism                                                                                                                                         |
| Bdor0620 CDS CDS         | 64.0    | 5.0   | 42.3    | KIG  | COG1940                         | Transcriptional regulator/sugar kinase                                                                                                                                                 |
| Bdor0319 CDS CDS         | 32.0    | 3.0   | 35.3    | KIG  | COG1940                         | Transcriptional regulator/sugar kinase                                                                                                                                                 |
| Aco13388 CDS CDS         | 10.0    | 1.0   | 33.1    | KIG  | COG1940                         | Transcriptional regulator/sugar kinase                                                                                                                                                 |
| Pmer1132 CDS CDS         | 31.3    | 5.0   | 20.7    | KIG  | COG1940                         | Transcriptional regulator/sugar kinase                                                                                                                                                 |
| PRABACT JOHN3582 CDS CDS | 3.8     | 1.0   | 12.4    | KIG  | COG1940                         | Transcriptional regulator/sugar kinase                                                                                                                                                 |
| BactD20285 CDS CDS       | 6.5     | 2.0   | 10.7    | KIG  | COG1940                         | Transcriptional regulator/sugar kinase                                                                                                                                                 |
| Bova1142 CDS CDS         | 6.5     | 2.0   | 10.7    | KIG  | COG1940                         | Transcriptional regulator/sugar kinase                                                                                                                                                 |
| Msmi741028 CDS CDS       | 9.8     | 1.0   | 32.2    | KIH  | COG0340 COG1654                 | Biotin-(acetyl-CoA carboxylase) ligase/Biotin operon repressor                                                                                                                         |
| Msmi750652 CDS CDS       | 10.3    | 2.0   | 16.9    | KIH  | COG0340 COG1654                 | Biotin-(acetyl-CoA carboxylase) ligase/Biotin operon repressor                                                                                                                         |
| TS29Rum11753 CDS CDS     | 1.0     | 39.0  | 0.1     | KIH  | COG0340 COG1654                 | Biotin-(acetyl-CoA carboxylase) ligase/Biotin operon repressor                                                                                                                         |
| TS28Fae16525 CDS CDS     | 1.0     | 42.0  | 0.1     | KIH  | COG0340 COG1654                 | Biotin-(acetyl-CoA carboxylase) ligase/Biotin operon repressor                                                                                                                         |
| TS28Fae14495 CDS CDS     | 1.0     | 105.0 | 0.0     | KJ/L | COG0513                         | Superfamily II DNA and RNA helicases                                                                                                                                                   |
| TS28Eub7645 CDS CDS      | 0.5     | 104.0 | 0.0     | KJ/L | COG0513                         | Superfamily II DNA and RNA helicases                                                                                                                                                   |
| TS29Fae03658 CDS CDS     | 3.5     | 0.3   | 34.7    | KIL  | COG1200                         | RecG-like helicase                                                                                                                                                                     |
| ShigspD91497 CDS CDS     | 10.0    | 1.0   | 33.1    | KIL  | COG0553                         | Superfamily II DNA/RNA helicases, SNF2 family                                                                                                                                          |
| Ccom0364 CDS CDS         | 7.0     | 1.0   | 23.1    | KIL  | COG4646                         | DNA methylase                                                                                                                                                                          |
| Rbro0308 CDS CDS         | 2.0     | 0.3   | 19.8    | KIL  | COG1197                         | Transcription-repair coupling factor (superfamily II helicase)                                                                                                                         |
| BactD14152 CDS CDS       | 7.0     | 1.5   | 15.4    | KIL  | COG0553 COG4279                 | Superfamily II DNA/RNA helicases, SNF2 family/Uncharacterized conserved protein                                                                                                        |
| TS28Fae20392 CDS CDS     | 4.5     | 151.0 | 0.1     | KJ/L | COG0587 COG0847 COG2176 COG1199 | DNA polymerase III, alpha subunit/DNA polymerase III, epsilon subunit and related 3'-5' exonucleases/DNA polymerase III, alpha subunit (gram-positive type)/Rad3-related DNA helicases |
| TS28Fae14347 CDS CDS     | 2.2     | 73.0  | 0.1     | KIL  | COG4646                         | DNA methylase                                                                                                                                                                          |
| Bun0472 CDS CDS          | 0.5     | 17.5  | 0.1     | KIL  | COG4646                         | DNA methylase                                                                                                                                                                          |

|                        |       |         |      |       |                                                                         |                                                                                                                                                                                                                                                                                                                                                |
|------------------------|-------|---------|------|-------|-------------------------------------------------------------------------|------------------------------------------------------------------------------------------------------------------------------------------------------------------------------------------------------------------------------------------------------------------------------------------------------------------------------------------------|
| Ccom0363 CDS CDS       | 2.5   | 94.8    | 0.1  | K L   | COG4646                                                                 | DNA methylase                                                                                                                                                                                                                                                                                                                                  |
| FrgaM2120225 CDS CDS   | 4.7   | 180.3   | 0.1  | K L   | COG4646                                                                 | DNA methylase                                                                                                                                                                                                                                                                                                                                  |
| TS29Rum19618 CDS CDS   | 0.5   | 19.5    | 0.1  | K L   | COG4646                                                                 | DNA methylase                                                                                                                                                                                                                                                                                                                                  |
| TS28Fae13120 CDS CDS   | 1.0   | 39.0    | 0.1  | K L   | COG1200                                                                 | RecG-like helicase                                                                                                                                                                                                                                                                                                                             |
| Bste0889 CDS CDS       | 0.5   | 21.7    | 0.1  | K L   | COG4646                                                                 | DNA methylase                                                                                                                                                                                                                                                                                                                                  |
| TS28Fae22501 CDS CDS   | 1.3   | 54.5    | 0.1  | K L   | COG4646                                                                 | DNA methylase                                                                                                                                                                                                                                                                                                                                  |
| TS28Fae18375 CDS CDS   | 1.7   | 70.5    | 0.1  | K L   | COG1197                                                                 | Transcription-repair coupling factor (superfamily II helicase)                                                                                                                                                                                                                                                                                 |
| Bfra31120117 CDS CDS   | 0.5   | 24.0    | 0.1  | K L   | COG4646                                                                 | DNA methylase                                                                                                                                                                                                                                                                                                                                  |
| TS29Dor2220 CDS CDS    | 3.5   | 162.0   | 0.1  | K L   | COG2176 COG1199                                                         | DNA polymerase III, alpha subunit (gram-positive type) Rad3-related DNA helicases                                                                                                                                                                                                                                                              |
| Rtor1774 CDS CDS       | 0.5   | 24.5    | 0.1  | K L   | COG0847 COG2176 COG0587 COG1199                                         | DNA polymerase III, epsilon subunit and related 3'-5' exonucleases DNA polymerase III, alpha subunit (gram-positive type) DNA polymerase III, alpha subunit Rad3-related DNA helicases                                                                                                                                                         |
| TS28Fae22425 CDS CDS   | 3.0   | 151.5   | 0.1  | K L   | COG4646                                                                 | DNA methylase                                                                                                                                                                                                                                                                                                                                  |
| TS28Clo00926 CDS CDS   | 13.0  | 671.0   | 0.1  | K L   | COG0847 COG2176 COG1199                                                 | DNA polymerase III, epsilon subunit and related 3'-5' exonucleases DNA polymerase III, alpha subunit (gram-positive type) Rad3-related DNA helicases                                                                                                                                                                                           |
| TS29RumUnc1438 CDS CDS | 6.0   | 313.0   | 0.1  | K L   | COG4646 COG0249                                                         | DNA methylase Mismatch repair ATPase (MutS family)                                                                                                                                                                                                                                                                                             |
| TS28Rum15982 CDS CDS   | 1.5   | 79.5    | 0.1  | K L   | COG0587 COG0847 COG2176 COG1199                                         | DNA polymerase III, alpha subunit DNA polymerase III, epsilon subunit and related 3'-5' exonucleases DNA polymerase III, alpha subunit (gram-positive type) Rad3-related DNA helicases                                                                                                                                                         |
| TS28LacUnc460 CDS CDS  | 1.0   | 53.5    | 0.1  | K L   | COG4646                                                                 | DNA methylase                                                                                                                                                                                                                                                                                                                                  |
| TS29Fae06227 CDS CDS   | 2.3   | 142.5   | 0.1  | K L   | COG4646                                                                 | DNA methylase                                                                                                                                                                                                                                                                                                                                  |
| Bsp1160234 CDS CDS     | 0.5   | 35.0    | 0.1  | K L   | COG4646                                                                 | DNA methylase                                                                                                                                                                                                                                                                                                                                  |
| TS29Fae04253 CDS CDS   | 1.0   | 70.0    | 0.0  | K L   | COG4646                                                                 | DNA methylase                                                                                                                                                                                                                                                                                                                                  |
| TS28Fae10662 CDS CDS   | 0.5   | 36.5    | 0.0  | K L   | COG4646                                                                 | DNA methylase                                                                                                                                                                                                                                                                                                                                  |
| CspM6211234 CDS CDS    | 0.5   | 36.5    | 0.0  | K L   | COG4646                                                                 | DNA methylase                                                                                                                                                                                                                                                                                                                                  |
| TS28Eub8475 CDS CDS    | 2.0   | 162.3   | 0.0  | K L   | COG1197                                                                 | Transcription-repair coupling factor (superfamily II helicase)                                                                                                                                                                                                                                                                                 |
| TS29Rum11602 CDS CDS   | 1.0   | 85.0    | 0.0  | K L   | COG1197                                                                 | Transcription-repair coupling factor (superfamily II helicase)                                                                                                                                                                                                                                                                                 |
| TS28Eub6362 CDS CDS    | 2.0   | 192.5   | 0.0  | K L   | COG4646                                                                 | DNA methylase                                                                                                                                                                                                                                                                                                                                  |
| TS29Fae06228 CDS CDS   | 2.0   | 227.0   | 0.0  | K L   | COG4646                                                                 | DNA methylase                                                                                                                                                                                                                                                                                                                                  |
| TS28Clo10619 CDS CDS   | 1.0   | 163.5   | 0.0  | K L   | COG4646                                                                 | DNA methylase                                                                                                                                                                                                                                                                                                                                  |
| TS28Dor2259 CDS CDS    | 5.0   | 1,022.5 | 0.0  | K L   | COG4646                                                                 | DNA methylase                                                                                                                                                                                                                                                                                                                                  |
| TS28Fae14355 CDS CDS   | 0.5   | 114.5   | 0.0  | K L   | COG0553                                                                 | Superfamily II DNA/RNA helicases. SNF2 family                                                                                                                                                                                                                                                                                                  |
| TS28Clo1001 CDS CDS    | 1.0   | 278.0   | 0.0  | K L   | COG1200                                                                 | RecG-like helicase                                                                                                                                                                                                                                                                                                                             |
| TS29Rum05409 CDS CDS   | 3.8   | 0.5     | 25.4 | K L T | COG0515 COG2815                                                         | Serine/threonine protein kinase Uncharacterized protein conserved in bacteria                                                                                                                                                                                                                                                                  |
| TS29Rum16622 CDS CDS   | 2.0   | 83.0    | 0.1  | K L T | COG0515 COG2815 COG5616                                                 | Serine/threonine protein kinase Uncharacterized protein conserved in bacteria Predicted integral membrane protein                                                                                                                                                                                                                              |
| TS28Fae13881 CDS CDS   | 0.5   | 25.5    | 0.1  | K L T | COG0515 COG2815 COG0631 COG3899 COG5635                                 | Serine/threonine protein kinase Uncharacterized protein conserved in bacteria Serine/threonine protein phosphatase Predicted ATPase Predicted NTPase (NACHT family)                                                                                                                                                                            |
| TS28Bac4871 CDS CDS    | 0.3   | 15.5    | 0.1  | K L V | COG4096 COG3886 COG1061                                                 | Type I site-specific restriction-modification system, R (restriction) subunit and related helicases Predicted HKD family nuclease DNA or RNA helicases of superfamily II                                                                                                                                                                       |
| TS29Bac09646 CDS CDS   | 0.3   | 19.0    | 0.1  | K L V | COG4096 COG3886 COG1061 COG0610                                         | Type I site-specific restriction-modification system, R (restriction) subunit and related helicases Predicted HKD family nuclease DNA or RNA helicases of superfamily II Type I site-specific restriction-modification system, R (restriction) subunit and related helicases                                                                   |
| Cspi1824 CDS CDS       | 10.0  | 1.0     | 33.1 | K M G | COG4464 COG1316                                                         | Capsular polysaccharide biosynthesis protein Transcriptional regulator                                                                                                                                                                                                                                                                         |
| Msmi750253 CDS CDS     | 6.0   | 0.3     | 79.4 | K O   | COG0378                                                                 | Ni <sup>2+</sup> -binding GTPase involved in regulation of expression and maturation of urease and hydrogenase                                                                                                                                                                                                                                 |
| Msmi741460 CDS CDS     | 8.3   | 1.3     | 22.0 | K O   | COG0378                                                                 | Ni <sup>2+</sup> -binding GTPase involved in regulation of expression and maturation of urease and hydrogenase                                                                                                                                                                                                                                 |
| Pmer3592 CDS CDS       | 4.5   | 1.0     | 14.9 | K O   | COG0378                                                                 | Ni <sup>2+</sup> -binding GTPase involved in regulation of expression and maturation of urease and hydrogenase                                                                                                                                                                                                                                 |
| Msmi750482 CDS CDS     | 1.3   | 0.3     | 12.4 | K Q   | COG0500 COG0789                                                         | SAM-dependent methyltransferases Predicted transcriptional regulators                                                                                                                                                                                                                                                                          |
| TS29Bac03068 CDS CDS   | 54.0  | 2.0     | 89.3 | K T   | COG3279                                                                 | Response regulator of the LyrR/AIqR family                                                                                                                                                                                                                                                                                                     |
| TS28Rum11325 CDS CDS   | 117.0 | 7.0     | 55.3 | K T   | COG0745 COG0784 COG3706 COG3707                                         | Response regulators consisting of a CheY-like receiver domain and a winged-helix DNA-binding domain FOG: CheY-like receiver Response regulator containing a CheY-like receiver domain and a GGDEF domain Response regulator with putative antiterminator output domain                                                                         |
| TS29Eub1244 CDS CDS    | 3.7   | 0.3     | 36.4 | K T   | COG0745                                                                 | Response regulators consisting of a CheY-like receiver domain and a winged-helix DNA-binding domain                                                                                                                                                                                                                                            |
| TS28Fae10112 CDS CDS   | 21.0  | 2.0     | 34.7 | K T   | COG4753 COG2207                                                         | Response regulator containing CheY-like receiver domain and AraC-type DNA-binding domain AraC-type DNA-binding domain-containing proteins                                                                                                                                                                                                      |
| TS29Rum01745 CDS CDS   | 8.0   | 1.0     | 26.5 | K T   | COG0745                                                                 | Response regulators consisting of a CheY-like receiver domain and a winged-helix DNA-binding domain                                                                                                                                                                                                                                            |
| TS29Rum04145 CDS CDS   | 3.7   | 0.5     | 24.3 | K T   | COG3275 COG2972 COG4936 COG5012                                         | Putative regulator of cell autolysis Predicted signal transduction protein with a C-terminal ATPase domain Predicted sensor domain Predicted cobalamin binding protein                                                                                                                                                                         |
| TS29Met0650 CDS CDS    | 5.3   | 0.9     | 18.9 | K T   | COG0517 COG0589 COG1994 COG2524 COG3448                                 | FOG: CBS domain Universal stress protein UspA and related nucleotide-binding proteins Zn-dependent proteases Predicted transcriptional regulator, contains C-terminal CBS domains CBS-domain-containing membrane protein                                                                                                                       |
| TS28Clo05696 CDS CDS   | 33.0  | 7.0     | 15.6 | K T   | COG1974                                                                 | SOS-response transcriptional repressors (RecA-mediated autophosphatases)                                                                                                                                                                                                                                                                       |
| TS29Bac03994 CDS CDS   | 3.1   | 0.8     | 13.7 | K T   | COG0642 COG5002 COG2202 COG2770 COG0784 COG3614 COG2203 COG3437 COG2205 | Signal transduction histidine kinase Signal transduction histidine kinase FOG: PAS/PAC domain FOG: HAMP domain FOG: CheY-like receiver Predicted periplasmic ligand-binding sensor domain FOG: GAF domain Response regulator containing a CheY-like receiver domain and an HD-GYP domain Osmosensitive K <sup>+</sup> channel histidine kinase |

|                      |       |       |       |     |                                                                                                 |                                                                                                                                                                                                                                                                                                                                                                                                                                                                                                                                                                                                                                                                                                                                                                                                                           |
|----------------------|-------|-------|-------|-----|-------------------------------------------------------------------------------------------------|---------------------------------------------------------------------------------------------------------------------------------------------------------------------------------------------------------------------------------------------------------------------------------------------------------------------------------------------------------------------------------------------------------------------------------------------------------------------------------------------------------------------------------------------------------------------------------------------------------------------------------------------------------------------------------------------------------------------------------------------------------------------------------------------------------------------------|
| TS29Fae08798 CDS CDS | 1.3   | 0.3   | 13.2  | K T | COG2770 COG4252 COG3437 COG2206                                                                 | FOG: HAMP domain Predicted transmembrane sensor domain Response regulator containing a CheY-like receiver domain and an HD-GYP domain HD-GYP domain                                                                                                                                                                                                                                                                                                                                                                                                                                                                                                                                                                                                                                                                       |
| TS29Rum16440 CDS CDS | 4.0   | 1.0   | 13.2  | K T | COG0745                                                                                         | Response regulators consisting of a CheY-like receiver domain and a winged-helix DNA-binding domain                                                                                                                                                                                                                                                                                                                                                                                                                                                                                                                                                                                                                                                                                                                       |
| TS29Bac08350 CDS CDS | 8.3   | 2.3   | 11.8  | K T | COG4753 COG2207                                                                                 | Response regulator containing CheY-like receiver domain and AraC-type DNA-binding domain AraC-type DNA-binding domain-containing proteins                                                                                                                                                                                                                                                                                                                                                                                                                                                                                                                                                                                                                                                                                 |
| TS29Fae07089 CDS CDS | 5.0   | 1.5   | 11.0  | K T | COG2770 COG3437 COG4936 COG2206                                                                 | FOG: HAMP domain Response regulator containing a CheY-like receiver domain and an HD-GYP domain Predicted sensor domain HD-GYP domain                                                                                                                                                                                                                                                                                                                                                                                                                                                                                                                                                                                                                                                                                     |
| TS28Eub6152 CDS CDS  | 3.0   | 104.0 | 0.1   | K T | COG0317                                                                                         | Guanosine polyphosphate pyrophosphohydrolases/synthetases Signal transduction histidine kinase Response regulators consisting of a CheY-like receiver domain and a winged-helix DNA-binding domain Response regulator containing CheY-like receiver domain and AraC-type DNA-binding domain AraC-type DNA-binding domain-containing proteins Response regulator containing CheY-like receiver, AAA-type ATPase, and DNA-binding domains FOG: CheY-like receiver Response regulator of the LysR/AlgR family Predicted sensor domain Response regulator containing a CheY-like receiver domain and a GGDEF domain Response regulator containing a CheY-like receiver domain and an HTH DNA-binding domain Serine phosphatase RsbU, regulator of sigma subunit Response regulator with putative antiterminator output domain |
| TS29Rum16904 CDS CDS | 2.0   | 70.0  | 0.1   | K T | COG0642 COG0745 COG4753 COG2207 COG2204 COG0784 COG3279 COG4936 COG3706 COG2197 COG2208 COG3707 |                                                                                                                                                                                                                                                                                                                                                                                                                                                                                                                                                                                                                                                                                                                                                                                                                           |
| TS29Rum17065 CDS CDS | 1.0   | 37.5  | 0.1   | K T | COG3275 COG2972 COG4936 COG5012                                                                 | Putative regulator of cell autolysis Predicted signal transduction protein with a C-terminal ATPase domain Predicted sensor domain Predicted cobalamin binding protein                                                                                                                                                                                                                                                                                                                                                                                                                                                                                                                                                                                                                                                    |
| TS28Clo01606 CDS CDS | 3.0   | 115.0 | 0.1   | K T | COG0789 COG0631                                                                                 | Predicted transcriptional regulators Serine/threonine protein phosphatase                                                                                                                                                                                                                                                                                                                                                                                                                                                                                                                                                                                                                                                                                                                                                 |
| TS28Fae16821 CDS CDS | 3.0   | 116.0 | 0.1   | K T | COG0642 COG2202 COG3452 COG0784 COG3614 COG2198 COG2203 COG3300 COG3437 COG5278 COG5001         | Signal transduction histidine kinase FOG: PAS/PAC domain Predicted periplasmic ligand-binding sensor domain FOG: CheY-like receiver Predicted periplasmic ligand-binding sensor domain FOG: HPT domain FOG: GAF domain MHYT domain (predicted integral membrane sensor domain) Response regulator containing a CheY-like receiver domain and an HD-GYP domain Predicted periplasmic ligand-binding sensor domain Predicted signal transduction protein containing a membrane domain, an EAL and a GGDEF domain                                                                                                                                                                                                                                                                                                            |
| TS28Dor2810 CDS CDS  | 0.3   | 10.0  | 0.1   | K T | COG0745                                                                                         | Response regulators consisting of a CheY-like receiver domain and a winged-helix DNA-binding domain                                                                                                                                                                                                                                                                                                                                                                                                                                                                                                                                                                                                                                                                                                                       |
| TS28Rum16217 CDS CDS | 1.0   | 41.0  | 0.1   | K T | COG3275 COG2972 COG4936 COG5012                                                                 | Putative regulator of cell autolysis Predicted signal transduction protein with a C-terminal ATPase domain Predicted sensor domain Predicted cobalamin binding protein                                                                                                                                                                                                                                                                                                                                                                                                                                                                                                                                                                                                                                                    |
| TS28Rum13359 CDS CDS | 1.0   | 42.0  | 0.1   | K T | COG0317                                                                                         | Guanosine polyphosphate pyrophosphohydrolases/synthetases                                                                                                                                                                                                                                                                                                                                                                                                                                                                                                                                                                                                                                                                                                                                                                 |
| TS28Col0835 CDS CDS  | 1.0   | 46.0  | 0.1   | K T | COG2770 COG4252 COG3437 COG2206                                                                 | FOG: HAMP domain Predicted transmembrane sensor domain Response regulator containing a CheY-like receiver domain and an HD-GYP domain HD-GYP domain                                                                                                                                                                                                                                                                                                                                                                                                                                                                                                                                                                                                                                                                       |
| TS28Rum02266 CDS CDS | 3.0   | 139.0 | 0.1   | K T | COG0642 COG3437 COG4251                                                                         | Signal transduction histidine kinase Response regulator containing a CheY-like receiver domain and an HD-GYP domain Bacteriophytochrome (light-regulated signal transduction histidine kinase)                                                                                                                                                                                                                                                                                                                                                                                                                                                                                                                                                                                                                            |
| TS28Fae21178 CDS CDS | 1.0   | 46.5  | 0.1   | K T | COG3275 COG2972 COG4936 COG5012                                                                 | Putative regulator of cell autolysis Predicted signal transduction protein with a C-terminal ATPase domain Predicted sensor domain Predicted cobalamin binding protein                                                                                                                                                                                                                                                                                                                                                                                                                                                                                                                                                                                                                                                    |
| TS28Eub8874 CDS CDS  | 0.5   | 23.5  | 0.1   | K T | COG3279                                                                                         | Response regulator of the LysR/AlgR family                                                                                                                                                                                                                                                                                                                                                                                                                                                                                                                                                                                                                                                                                                                                                                                |
| TS29Fae06932 CDS CDS | 0.5   | 25.5  | 0.1   | K T | COG0317                                                                                         | Guanosine polyphosphate pyrophosphohydrolases/synthetases                                                                                                                                                                                                                                                                                                                                                                                                                                                                                                                                                                                                                                                                                                                                                                 |
| TS29Rum17051 CDS CDS | 1.0   | 54.0  | 0.1   | K T | COG3275 COG2972 COG4936 COG5012                                                                 | Putative regulator of cell autolysis Predicted signal transduction protein with a C-terminal ATPase domain Predicted sensor domain Predicted cobalamin binding protein                                                                                                                                                                                                                                                                                                                                                                                                                                                                                                                                                                                                                                                    |
| TS28Fae21013 CDS CDS | 0.5   | 37.0  | 0.0   | K T | COG2208                                                                                         | Serine phosphatase RsbU, regulator of sigma subunit                                                                                                                                                                                                                                                                                                                                                                                                                                                                                                                                                                                                                                                                                                                                                                       |
| TS28Fae10546 CDS CDS | 0.5   | 39.0  | 0.0   | K T | COG3275 COG2972 COG4936 COG5012                                                                 | Putative regulator of cell autolysis Predicted signal transduction protein with a C-terminal ATPase domain Predicted sensor domain Predicted cobalamin binding protein                                                                                                                                                                                                                                                                                                                                                                                                                                                                                                                                                                                                                                                    |
| TS28Eub5717 CDS CDS  | 0.5   | 50.0  | 0.0   | K T | COG0745                                                                                         | Response regulators consisting of a CheY-like receiver domain and a winged-helix DNA-binding domain                                                                                                                                                                                                                                                                                                                                                                                                                                                                                                                                                                                                                                                                                                                       |
| TS29Rum16556 CDS CDS | 0.3   | 33.0  | 0.0   | K T | COG4753 COG2207                                                                                 | Response regulator containing CheY-like receiver domain and AraC-type DNA-binding domain AraC-type DNA-binding domain-containing proteins                                                                                                                                                                                                                                                                                                                                                                                                                                                                                                                                                                                                                                                                                 |
| TS28Fae17711 CDS CDS | 0.5   | 112.5 | 0.0   | K T | COG0317                                                                                         | Guanosine polyphosphate pyrophosphohydrolases/synthetases                                                                                                                                                                                                                                                                                                                                                                                                                                                                                                                                                                                                                                                                                                                                                                 |
| TS28Fae00886 CDS CDS | 250.0 | 6.0   | 137.8 | L   | COG3747                                                                                         | Phage terminase, small subunit                                                                                                                                                                                                                                                                                                                                                                                                                                                                                                                                                                                                                                                                                                                                                                                            |
| Bdor1507 CDS CDS     | 40.0  | 1.0   | 132.3 | L   | COG0776                                                                                         | Bacterial nucleoid DNA-binding protein                                                                                                                                                                                                                                                                                                                                                                                                                                                                                                                                                                                                                                                                                                                                                                                    |
| Bcae3586 CDS CDS     | 7.7   | 0.2   | 127.0 | L   | COG3666                                                                                         | Transposase and inactivated derivatives                                                                                                                                                                                                                                                                                                                                                                                                                                                                                                                                                                                                                                                                                                                                                                                   |
| Bcae1263 CDS CDS     | 7.7   | 0.2   | 127.0 | L   | COG3666                                                                                         | Transposase and inactivated derivatives                                                                                                                                                                                                                                                                                                                                                                                                                                                                                                                                                                                                                                                                                                                                                                                   |
| TS29Rum15354 CDS CDS | 15.0  | 0.5   | 99.2  | L   | COG3077                                                                                         | DNA-damage-inducible protein J                                                                                                                                                                                                                                                                                                                                                                                                                                                                                                                                                                                                                                                                                                                                                                                            |
| TS29Bac08102 CDS CDS | 23.0  | 1.0   | 76.1  | L   | COG0776                                                                                         | Bacterial nucleoid DNA-binding protein                                                                                                                                                                                                                                                                                                                                                                                                                                                                                                                                                                                                                                                                                                                                                                                    |
| ShigsD91957 CDS CDS  | 7.5   | 0.5   | 49.6  | L   | COG1330                                                                                         | Exonuclease V gamma subunit                                                                                                                                                                                                                                                                                                                                                                                                                                                                                                                                                                                                                                                                                                                                                                                               |
| TS29Bac09000 CDS CDS | 14.0  | 1.0   | 46.3  | L   | COG0497                                                                                         | ATPase involved in DNA repair                                                                                                                                                                                                                                                                                                                                                                                                                                                                                                                                                                                                                                                                                                                                                                                             |
| Msmi741450 CDS CDS   | 6.7   | 0.5   | 44.1  | L   | COG0535 COG0084                                                                                 | Predicted Fe-S oxidoreductases Mg-dependent DNase                                                                                                                                                                                                                                                                                                                                                                                                                                                                                                                                                                                                                                                                                                                                                                         |
| TS28Rum15890 CDS CDS | 6.5   | 0.5   | 43.0  | L   | COG0629                                                                                         | Single-stranded DNA-binding protein                                                                                                                                                                                                                                                                                                                                                                                                                                                                                                                                                                                                                                                                                                                                                                                       |
| TS29Fae04135 CDS CDS | 12.5  | 1.0   | 41.3  | L   | COG0776                                                                                         | Bacterial nucleoid DNA-binding protein                                                                                                                                                                                                                                                                                                                                                                                                                                                                                                                                                                                                                                                                                                                                                                                    |
| Bdor4354 CDS CDS     | 45.5  | 4.0   | 37.6  | L   | COG4974 COG0582 COG4973                                                                         | Site-specific recombinase XerD Integrase Site-specific recombinase XerC                                                                                                                                                                                                                                                                                                                                                                                                                                                                                                                                                                                                                                                                                                                                                   |
| Csci0290 CDS CDS     | 5.5   | 0.5   | 36.4  | L   | COG0338                                                                                         | Site-specific DNA methylase                                                                                                                                                                                                                                                                                                                                                                                                                                                                                                                                                                                                                                                                                                                                                                                               |
| Beat0630 CDS CDS     | 2.8   | 0.3   | 36.4  | L   | COG0178                                                                                         | Excinuclease ATPase subunit                                                                                                                                                                                                                                                                                                                                                                                                                                                                                                                                                                                                                                                                                                                                                                                               |
| TS29Fae09571 CDS CDS | 27.0  | 2.5   | 35.7  | L   | COG3077                                                                                         | DNA-damage-inducible protein J                                                                                                                                                                                                                                                                                                                                                                                                                                                                                                                                                                                                                                                                                                                                                                                            |
| Svar2615 CDS CDS     | 10.3  | 1.0   | 34.2  | L   | COG0863                                                                                         | DNA modification methylase                                                                                                                                                                                                                                                                                                                                                                                                                                                                                                                                                                                                                                                                                                                                                                                                |
| Bste3093 CDS CDS     | 15.2  | 1.5   | 33.4  | L   | COG0608 COG4199                                                                                 | Single-stranded DNA-specific exonuclease Uncharacterized protein conserved in bacteria                                                                                                                                                                                                                                                                                                                                                                                                                                                                                                                                                                                                                                                                                                                                    |
| BactD20693 CDS CDS   | 5.0   | 0.5   | 33.1  | L   | COG0419                                                                                         | ATPase involved in DNA repair                                                                                                                                                                                                                                                                                                                                                                                                                                                                                                                                                                                                                                                                                                                                                                                             |

|                       |       |      |      |   |                         |                                                                                                                   |
|-----------------------|-------|------|------|---|-------------------------|-------------------------------------------------------------------------------------------------------------------|
| CspM6210208 CDS CDS   | 10.0  | 1.0  | 33.1 | L | COG0187                 | Type IIA topoisomerase (DNA gyrase/topo II, topoisomerase IV), B subunit                                          |
| Msmi750357 CDS CDS    | 3.3   | 0.3  | 32.2 | L | COG0582                 | Integrase                                                                                                         |
| Pmer0709 CDS CDS      | 4.8   | 0.5  | 32.0 | L | COG0629                 | Single-stranded DNA-binding protein                                                                               |
| ShigspD92095 CDS CDS  | 4.8   | 0.5  | 32.0 | L | COG0497                 | ATPase involved in DNA repair                                                                                     |
| TS29Bac11459 CDS CDS  | 19.0  | 2.0  | 31.4 | L | COG3677                 | Transposase and inactivated derivatives                                                                           |
| BVU2684 CDS Integrase | 4.7   | 0.5  | 30.9 | L | COG4974 COG0582         | Site-specific recombinase XerD Integrase                                                                          |
| Msmi740832 CDS CDS    | 2.3   | 0.3  | 30.9 | L | COG0648                 | Endonuclease IV                                                                                                   |
| Bcap0408 CDS CDS      | 9.0   | 1.0  | 29.8 | L | COG0420                 | DNA repair exonuclease                                                                                            |
| Bcap2043 CDS CDS      | 9.0   | 1.0  | 29.8 | L | COG0389                 | Nucleotidyltransferase/DNA polymerase involved in DNA repair                                                      |
| ShigspD90567 CDS CDS  | 9.0   | 1.0  | 29.8 | L | COG0266                 | Formamidopyrimidine-DNA glycosylase                                                                               |
| BactD20034 CDS CDS    | 17.2  | 2.0  | 28.5 | L | COG4974 COG0582 COG4973 | Site-specific recombinase XerD Integrase Site-specific recombinase XerC                                           |
| TS29Bac07655 CDS CDS  | 8.3   | 1.0  | 27.6 | L | COG1092 COG0116         | Predicted SAM-dependent methyltransferases Predicted N6-adenine-specific DNA methylase                            |
| Ehal0472 CDS CDS      | 4.0   | 0.5  | 26.5 | L | COG2812 COG0470         | DNA polymerase III, gamma/tau subunits ATPase involved in DNA replication                                         |
| Bdor1374 CDS CDS      | 8.0   | 1.0  | 26.5 | L | COG0749                 | DNA polymerase I - 3'-5' exonuclease and polymerase domains                                                       |
| Cbol2875 CDS CDS      | 8.0   | 1.0  | 26.5 | L | COG0497                 | ATPase involved in DNA repair                                                                                     |
| TS29Bac09004 CDS CDS  | 15.3  | 2.0  | 25.3 | L | COG0592                 | DNA polymerase sliding clamp subunit (PCNA homolog)                                                               |
| Pmer0706 CDS CDS      | 7.5   | 1.0  | 24.8 | L | COG0776                 | Bacterial nucleoid DNA-binding protein                                                                            |
| Bdor2037 CDS CDS      | 104.0 | 14.0 | 24.6 | L | COG0187                 | Type IIA topoisomerase (DNA gyrase/topo II, topoisomerase IV), B subunit                                          |
| Bste1695 CDS CDS      | 0.6   | 0.1  | 23.9 | L | COG3666                 | Transposase and inactivated derivatives                                                                           |
| Bste1631 CDS CDS      | 0.6   | 0.1  | 23.9 | L | COG3666                 | Transposase and inactivated derivatives                                                                           |
| Bste2396 CDS CDS      | 0.6   | 0.1  | 23.9 | L | COG3666                 | Transposase and inactivated derivatives                                                                           |
| Bste2529 CDS CDS      | 0.6   | 0.1  | 23.9 | L | COG3666                 | Transposase and inactivated derivatives                                                                           |
| Bste197 CDS CDS       | 0.6   | 0.1  | 23.9 | L | COG3666                 | Transposase and inactivated derivatives                                                                           |
| Bste0976 CDS CDS      | 0.6   | 0.1  | 23.9 | L | COG3666                 | Transposase and inactivated derivatives                                                                           |
| Bste1975 CDS CDS      | 0.6   | 0.1  | 23.9 | L | COG3666                 | Transposase and inactivated derivatives                                                                           |
| Bste3032 CDS CDS      | 0.6   | 0.1  | 23.9 | L | COG3666                 | Transposase and inactivated derivatives                                                                           |
| Bste2904 CDS CDS      | 0.6   | 0.1  | 23.9 | L | COG3666                 | Transposase and inactivated derivatives                                                                           |
| Bste2982 CDS CDS      | 0.6   | 0.1  | 23.9 | L | COG3666                 | Transposase and inactivated derivatives                                                                           |
| Msmi751226 CDS CDS    | 7.2   | 1.0  | 23.8 | L | COG1599                 | Single-stranded DNA-binding replication protein A (RPA), large (70 kD) subunit and related ssDNA-binding proteins |
| Msmi740029 CDS CDS    | 1.8   | 0.3  | 23.1 | L | COG1372 COG1241         | Intein/homing endonuclease Predicted ATPase involved in replication control, Cdc46/Mcm family                     |
| TS28Fae01135 CDS CDS  | 7.0   | 1.0  | 23.1 | L | COG0708                 | Exonuclease III                                                                                                   |
| TS29Fae02977 CDS CDS  | 3.5   | 0.5  | 23.1 | L | COG0497                 | ATPase involved in DNA repair                                                                                     |
| Pmer1109 CDS CDS      | 54.0  | 8.0  | 22.3 | L | COG4974 COG0582 COG4973 | Site-specific recombinase XerD Integrase Site-specific recombinase XerC                                           |
| BactD12360 CDS CDS    | 2.3   | 0.3  | 22.3 | L | COG2812 COG0470         | DNA polymerase III, gamma/tau subunits ATPase involved in DNA replication                                         |
| Msmi741433 CDS CDS    | 5.5   | 0.8  | 21.8 | L | COG1467                 | Eukaryotic-type DNA primase, catalytic (small) subunit                                                            |
| Msmi741346 CDS CDS    | 3.3   | 0.5  | 21.5 | L | COG0582                 | Integrase                                                                                                         |
| TS29Fae07402 CDS CDS  | 127.0 | 20.0 | 21.0 | L | COG0350                 | Methylated DNA-protein cysteine methyltransferase                                                                 |
| Bova3473 CDS CDS      | 6.3   | 1.0  | 20.7 | L | COG0494                 | NTP pyrophosphohydrolases including oxidative damage repair enzymes                                               |
| TS29Bac00690 CDS CDS  | 6.0   | 1.0  | 19.8 | L | COG4974 COG0582 COG4973 | Site-specific recombinase XerD Integrase Site-specific recombinase XerC                                           |
| TS29Fae04944 CDS CDS  | 6.0   | 1.0  | 19.8 | L | COG3077                 | DNA-damage-inducible protein J                                                                                    |
| TS29Rum06027 CDS CDS  | 3.0   | 0.5  | 19.8 | L | COG1570                 | Exonuclease VII, large subunit                                                                                    |
| TS28CorUnc132 CDS CDS | 6.0   | 1.0  | 19.8 | L | COG1484                 | DNA replication protein                                                                                           |
| Acol3943 CDS CDS      | 6.0   | 1.0  | 19.8 | L | COG0629                 | Single-stranded DNA-binding protein                                                                               |
| TS29Rum12668 CDS CDS  | 6.0   | 1.0  | 19.8 | L | COG0358                 | DNA primase (bacterial type)                                                                                      |
| TS28Rum14396 CDS CDS  | 20.0  | 3.5  | 18.9 | L | COG3077                 | DNA-damage-inducible protein J                                                                                    |
| TS29Fae05592 CDS CDS  | 5.5   | 1.0  | 18.2 | L | COG0608 COG4199         | Single-stranded DNA-specific exonuclease Uncharacterized protein conserved in bacteria                            |
| BactD11046 CDS CDS    | 2.8   | 0.5  | 18.2 | L | COG0494                 | NTP pyrophosphohydrolases including oxidative damage repair enzymes                                               |
| Bxyl0125 CDS CDS      | 5.3   | 1.0  | 17.5 | L | COG0178                 | Excinuclease ATPase subunit                                                                                       |
| TS29Bac04603 CDS CDS  | 5.3   | 1.0  | 17.5 | L | COG0178                 | Excinuclease ATPase subunit                                                                                       |
| Cnex0605 CDS CDS      | 13.0  | 2.5  | 17.2 | L | COG1961                 | Site-specific recombinases, DNA invertase Pin homologs                                                            |
| Bste1189 CDS CDS      | 51.2  | 10.0 | 16.9 | L | COG0188                 | Type IIA topoisomerase (DNA gyrase/topo II, topoisomerase IV), A subunit                                          |
| TS29Met0388 CDS CDS   | 6.8   | 1.4  | 16.7 | L | COG0592                 | DNA polymerase sliding clamp subunit (PCNA homolog)                                                               |
| Bhan1923 CDS CDS      | 5.0   | 1.0  | 16.5 | L | COG4974 COG0582 COG4973 | Site-specific recombinase XerD Integrase Site-specific recombinase XerC                                           |
| Bcel3796 CDS CDS      | 5.0   | 1.0  | 16.5 | L | COG4974 COG0582         | Site-specific recombinase XerD Integrase                                                                          |
| TS29Bac11452 CDS CDS  | 10.0  | 2.0  | 16.5 | L | COG4974                 | Site-specific recombinase XerD                                                                                    |
| CspM6211329 CDS CDS   | 5.0   | 1.0  | 16.5 | L | COG3935                 | Putative primosome component and related proteins                                                                 |
| RintL11139 CDS CDS    | 5.0   | 1.0  | 16.5 | L | COG0827                 | Adenine-specific DNA methylase                                                                                    |
| Bdor0651 CDS CDS      | 5.0   | 1.0  | 16.5 | L | COG0776                 | Bacterial nucleoid DNA-binding protein                                                                            |
| Csvm1464 CDS CDS      | 5.0   | 1.0  | 16.5 | L | COG0749                 | DNA polymerase I - 3'-5' exonuclease and polymerase domains                                                       |
| Dfor1535 CDS CDS      | 10.0  | 2.0  | 16.5 | L | COG0742                 | N6-adenine-specific methylase                                                                                     |
| Aput2051 CDS CDS      | 5.0   | 1.0  | 16.5 | L | COG0497                 | ATPase involved in DNA repair                                                                                     |
| TS29Bac09565 CDS CDS  | 30.0  | 6.0  | 16.5 | L | COG0322                 | Nuclease subunit of the excinuclease complex                                                                      |
| ShigspD91897 CDS CDS  | 4.8   | 1.0  | 16.0 | L | COG0608 COG4199         | Single-stranded DNA-specific exonuclease Uncharacterized protein conserved in bacteria                            |
| Msmi740449 CDS CDS    | 7.2   | 1.5  | 15.8 | L | COG1599                 | Single-stranded DNA-binding replication protein A (RPA), large (70 kD) subunit and related ssDNA-binding proteins |
| Bste2315 CDS CDS      | 23.0  | 5.0  | 15.2 | L | COG4974 COG0582 COG4973 | Site-specific recombinase XerD Integrase Site-specific recombinase XerC                                           |
| Msmi740106 CDS CDS    | 1.5   | 0.3  | 14.9 | L | COG4974 COG0582 COG4973 | Site-specific recombinase XerD Integrase Site-specific recombinase XerC                                           |
| Bple2418 CDS CDS      | 1.1   | 0.3  | 14.9 | L | COG4974 COG0582         | Site-specific recombinase XerD Integrase                                                                          |
| Pmer0904 CDS CDS      | 1.1   | 0.3  | 14.9 | L | COG4974 COG0582         | Site-specific recombinase XerD Integrase                                                                          |
| TS28Fae02206 CDS CDS  | 13.0  | 3.0  | 14.3 | L | COG1573                 | Uracil-DNA glycosylase                                                                                            |
| TS28Dor1424 CDS CDS   | 6.5   | 1.5  | 14.3 | L | COG0776                 | Bacterial nucleoid DNA-binding protein                                                                            |
| Dfor2783 CDS CDS      | 6.5   | 1.5  | 14.3 | L | COG0776                 | Bacterial nucleoid DNA-binding protein                                                                            |
| Csvm3370 CDS CDS      | 4.3   | 1.0  | 14.3 | L | COG0323                 | DNA mismatch repair enzyme (predicted ATPase)                                                                     |

|                                  |       |       |      |   |                         |                                                                                                                                                          |
|----------------------------------|-------|-------|------|---|-------------------------|----------------------------------------------------------------------------------------------------------------------------------------------------------|
| TS28Fae22057 CDS CDS             | 28.0  | 6.5   | 14.2 | L | COG3077                 | DNA-damage-inducible protein J                                                                                                                           |
| Msmi751024 CDS CDS               | 6.8   | 1.6   | 14.1 | L | COG0592                 | DNA polymerase sliding clamp subunit (PCNA homolog)                                                                                                      |
| TS29Fae08192 CDS CDS             | 10.5  | 2.5   | 13.9 | L | COG3857                 | ATP-dependent nuclease, subunit B                                                                                                                        |
| Cnex3309 CDS CDS                 | 14.3  | 3.4   | 13.8 | L | COG0507                 | ATP-dependent exoDNase (exonuclease V), alpha subunit - helicase superfamily I member                                                                    |
| Pmer1472 CDS CDS                 | 10.3  | 2.5   | 13.7 | L | COG1466                 | DNA polymerase III, delta subunit                                                                                                                        |
| Msmi741117 CDS CDS               | 5.5   | 1.3   | 13.6 | L | COG0708                 | Exonuclease III                                                                                                                                          |
| TS29RumUnc1301 CDS CDS           | 119.0 | 29.0  | 13.6 | L | COG1961                 | Site-specific recombinases, DNA invertase Pin homologs                                                                                                   |
| Bste2314 CDS CDS                 | 4.0   | 1.0   | 13.2 | L | COG4974                 | Site-specific recombinase XerD                                                                                                                           |
| TS29Fae03430 CDS CDS             | 4.0   | 1.0   | 13.2 | L | COG0749                 | DNA polymerase I - 3'-5' exonuclease and polymerase domains                                                                                              |
| BactD21156 CDS CDS               | 4.0   | 1.0   | 13.2 | L | COG0587                 | DNA polymerase III, alpha subunit                                                                                                                        |
| TS29Bac00084 CDS CDS             | 2.0   | 0.5   | 13.2 | L | COG0468                 | RecA/RadA recombinase                                                                                                                                    |
| Rgna1549 CDS CDS                 | 4.0   | 1.0   | 13.2 | L | COG0419                 | ATPase involved in DNA repair                                                                                                                            |
| Even0310 CDS CDS                 | 8.0   | 2.0   | 13.2 | L | COG0249 COG1193         | Mismatch repair ATPase (MutS family) Mismatch repair ATPase (MutS family)                                                                                |
| TS29Bac11051 CDS CDS             | 4.0   | 1.0   | 13.2 | L | COG0210                 | Superfamily I DNA and RNA helicases                                                                                                                      |
| Cnex3307 CDS CDS                 | 9.0   | 2.3   | 12.8 | L | COG1484                 | DNA replication protein                                                                                                                                  |
| Bum10626 CDS CDS                 | 18.5  | 5.0   | 12.2 | L | COG4974 COG0582 COG4973 | Site-specific recombinase XerD Integrase Site-specific recombinase XerC                                                                                  |
| Pmer3066 CDS CDS                 | 5.5   | 1.5   | 12.1 | L | COG0323                 | DNA mismatch repair enzyme (predicted ATPase)                                                                                                            |
| Cbo11027 CDS CDS                 | 3.5   | 1.0   | 11.6 | L | COG2256                 | ATPase related to the helicase subunit of the Holliday junction resolvase                                                                                |
| TS28Met1205 CDS CDS              | 3.5   | 1.0   | 11.6 | L | COG0258                 | 5'-3' exonuclease (including N-terminal domain of PolI)                                                                                                  |
| TS29Bac01498 CDS CDS             | 3.5   | 1.0   | 11.6 | L | COG0187                 | Type IIA topoisomerase (DNA gyrase/topo II, topoisomerase IV), B subunit                                                                                 |
| Bova0516 CDS CDS                 | 3.4   | 1.0   | 11.3 | L | COG0188                 | Type IIA topoisomerase (DNA gyrase/topo II, topoisomerase IV), A subunit                                                                                 |
| TS29Fae07925 CDS CDS             | 17.0  | 5.0   | 11.2 | L | COG1484                 | DNA replication protein                                                                                                                                  |
| Eeli0593 CDS CDS                 | 10.0  | 3.0   | 11.0 | L | COG2256 COG2110         | ATPase related to the helicase subunit of the Holliday junction resolvase Predicted phosphatase homologous to the C-terminal domain of histone macroH2A1 |
| Pmer2081 CDS CDS                 | 5.0   | 1.5   | 11.0 | L | COG0608 COG4199         | Single-stranded DNA-specific exonuclease Uncharacterized protein conserved in bacteria                                                                   |
| TS29Bac00518 CDS CDS             | 3.3   | 1.0   | 11.0 | L | COG0582                 | Integrase                                                                                                                                                |
| Bdor2747 CDS CDS                 | 6.7   | 2.0   | 11.0 | L | COG0338                 | Site-specific DNA methylase                                                                                                                              |
| BT4011 CDS DNA-methyltransferase | 6.7   | 2.0   | 11.0 | L | COG0338                 | Site-specific DNA methylase                                                                                                                              |
| Bple1073 CDS CDS                 | 7.7   | 2.3   | 10.9 | L | COG4974 COG0582 COG4973 | Site-specific recombinase XerD Integrase Site-specific recombinase XerC                                                                                  |
| RintL10085 CDS CDS               | 6.7   | 2.0   | 10.9 | L | COG1961                 | Site-specific recombinases, DNA invertase Pin homologs                                                                                                   |
| Beap2227 CDS CDS                 | 1.0   | 0.3   | 10.7 | L | COG1961                 | Site-specific recombinases, DNA invertase Pin homologs                                                                                                   |
| TS28Par1582 CDS CDS              | 4.8   | 1.5   | 10.7 | L | COG0629                 | Single-stranded DNA-binding protein                                                                                                                      |
| Bum1462 CDS CDS                  | 16.0  | 5.0   | 10.6 | L | COG3436                 | Transposase and inactivated derivatives                                                                                                                  |
| Bdor3575 CDS CDS                 | 16.0  | 5.0   | 10.6 | L | COG1573                 | Uracil-DNA glycosylase                                                                                                                                   |
| TS28Fae17704 CDS CDS             | 38.0  | 12.0  | 10.5 | L | COG0776                 | Bacterial nucleoid DNA-binding protein                                                                                                                   |
| BactD10040 CDS CDS               | 1.5   | 0.5   | 10.2 | L | COG0514                 | Superfamily II DNA helicase                                                                                                                              |
| CspL20344 CDS CDS                | 0.1   | 3.3   | 0.1  | L | COG0582                 | Integrase                                                                                                                                                |
| TS28Bac6344 CDS CDS              | 2.0   | 67.0  | 0.1  | L | COG4644                 | Transposase and inactivated derivatives, TnpA family                                                                                                     |
| TS28Fae20444 CDS CDS             | 5.8   | 196.5 | 0.1  | L | COG3547                 | Transposase and inactivated derivatives                                                                                                                  |
| TS29Rum16629 CDS CDS             | 1.0   | 34.0  | 0.1  | L | COG1198                 | Primosomal protein N' (replication factor Y) - superfamily II helicase                                                                                   |
| TS28Bac6624 CDS CDS              | 1.0   | 34.0  | 0.1  | L | COG0494                 | NTP pyrophosphohydrolases including oxidative damage repair enzymes                                                                                      |
| TS28Fae08113 CDS CDS             | 1.0   | 34.0  | 0.1  | L | COG0419                 | ATPase involved in DNA repair                                                                                                                            |
| Dlon2223 CDS CDS                 | 0.5   | 17.0  | 0.1  | L | COG0249                 | Mismatch repair ATPase (MutS family)                                                                                                                     |
| Eeli1963 CDS CDS                 | 0.5   | 17.0  | 0.1  | L | COG0188                 | Type IIA topoisomerase (DNA gyrase/topo II, topoisomerase IV), A subunit                                                                                 |
| TS28Fae13116 CDS CDS             | 1.0   | 34.0  | 0.1  | L | COG0188                 | Type IIA topoisomerase (DNA gyrase/topo II, topoisomerase IV), A subunit                                                                                 |
| Cmet2531 CDS CDS                 | 2.0   | 68.9  | 0.1  | L | COG1484                 | DNA replication protein                                                                                                                                  |
| CspM6211929 CDS CDS              | 2.0   | 68.9  | 0.1  | L | COG1484                 | DNA replication protein                                                                                                                                  |
| Bsp1160226 CDS CDS               | 0.7   | 23.0  | 0.1  | L | COG4974 COG0582         | Site-specific recombinase XerD Integrase                                                                                                                 |
| CspS22971 CDS CDS                | 1.2   | 41.4  | 0.1  | L | COG2946                 | Putative phage replication protein RstA                                                                                                                  |
| TS28Fae12128 CDS CDS             | 1.0   | 35.0  | 0.1  | L | COG1961 COG3293         | Site-specific recombinases, DNA invertase Pin homologs Transposase and inactivated derivatives                                                           |
| TS28Clo10670 CDS CDS             | 1.0   | 35.0  | 0.1  | L | COG0323                 | DNA mismatch repair enzyme (predicted ATPase)                                                                                                            |
| Ccom0063 CDS CDS                 | 1.0   | 35.3  | 0.1  | L | COG0582                 | Integrase                                                                                                                                                |
| Ehal0926 CDS CDS                 | 1.0   | 35.3  | 0.1  | L | COG0582                 | Integrase                                                                                                                                                |
| TS28Bac0268 CDS CDS              | 1.0   | 35.5  | 0.1  | L | COG0507                 | ATP-dependent exoDNase (exonuclease V), alpha subunit - helicase superfamily I member                                                                    |
| TS28Bac8358 CDS CDS              | 1.0   | 36.0  | 0.1  | L | COG3649                 | Uncharacterized protein predicted to be involved in DNA repair                                                                                           |
| Cbo13944 CDS CDS                 | 1.0   | 36.0  | 0.1  | L | COG3344                 | Retron-type reverse transcriptase                                                                                                                        |
| TS28Bac8091 CDS CDS              | 0.5   | 18.0  | 0.1  | L | COG1195                 | Recombinational DNA repair ATPase (RecF pathway)                                                                                                         |
| Robe2389 CDS CDS                 | 1.5   | 54.0  | 0.1  | L | COG0389                 | Nucleotidyltransferase/DNA polymerase involved in DNA repair                                                                                             |
| FpraM2121286 CDS CDS             | 0.3   | 12.0  | 0.1  | L | COG0593                 | ATPase involved in DNA replication initiation                                                                                                            |
| TS28Fae20705 CDS CDS             | 1.5   | 55.0  | 0.1  | L | COG1198                 | Primosomal protein N' (replication factor Y) - superfamily II helicase                                                                                   |
| TS28Rum15361 CDS CDS             | 2.0   | 73.5  | 0.1  | L | COG0749                 | DNA polymerase I - 3'-5' exonuclease and polymerase domains                                                                                              |
| TS28Fae22092 CDS CDS             | 3.0   | 110.5 | 0.1  | L | COG0749                 | DNA polymerase I - 3'-5' exonuclease and polymerase domains                                                                                              |
| Beap3404 CDS CDS                 | 2.0   | 74.0  | 0.1  | L | COG3328                 | Transposase and inactivated derivatives                                                                                                                  |
| TS28Fae20510 CDS CDS             | 0.5   | 19.0  | 0.1  | L | COG0776                 | Bacterial nucleoid DNA-binding protein                                                                                                                   |
| TS28Dor0412 CDS CDS              | 0.5   | 19.0  | 0.1  | L | COG0249                 | Mismatch repair ATPase (MutS family)                                                                                                                     |
| Rlac1490 CDS CDS                 | 0.9   | 33.7  | 0.1  | L | COG3335                 | Transposase and inactivated derivatives                                                                                                                  |
| Rlac1736 CDS CDS                 | 0.9   | 33.7  | 0.1  | L | COG3335                 | Transposase and inactivated derivatives                                                                                                                  |
| Rlac1778 CDS CDS                 | 0.9   | 33.7  | 0.1  | L | COG3335                 | Transposase and inactivated derivatives                                                                                                                  |
| Rlac0850 CDS CDS                 | 0.9   | 33.7  | 0.1  | L | COG3335                 | Transposase and inactivated derivatives                                                                                                                  |
| Rlac1138 CDS CDS                 | 0.9   | 33.7  | 0.1  | L | COG3335                 | Transposase and inactivated derivatives                                                                                                                  |
| Rlac1122 CDS CDS                 | 0.9   | 33.7  | 0.1  | L | COG3335                 | Transposase and inactivated derivatives                                                                                                                  |
| Rlac0941 CDS CDS                 | 0.9   | 33.7  | 0.1  | L | COG3335                 | Transposase and inactivated derivatives                                                                                                                  |
| TS28Fub3958 CDS CDS              | 0.9   | 33.7  | 0.1  | L | COG3335                 | Transposase and inactivated derivatives                                                                                                                  |
| Bxyl3533 CDS CDS                 | 2.5   | 97.5  | 0.1  | L | COG3666                 | Transposase and inactivated derivatives                                                                                                                  |



|                         |      |       |     |   |                         |                                                                                                                                                                                                             |
|-------------------------|------|-------|-----|---|-------------------------|-------------------------------------------------------------------------------------------------------------------------------------------------------------------------------------------------------------|
| TS28Rum13352 CDS CDS    | 1.0  | 39.0  | 0.1 | L | COG1198                 | Primosomal protein N' (replication factor Y) - superfamily II helicase                                                                                                                                      |
| Cbol3956 CDS CDS        | 1.1  | 42.8  | 0.1 | L | COG0358                 | DNA primase (bacterial type)                                                                                                                                                                                |
| TS28Clo02235 CDS CDS    | 0.5  | 19.8  | 0.1 | L | COG0675                 | Transposase and inactivated derivatives                                                                                                                                                                     |
| TS28Dor3030 CDS CDS     | 0.8  | 29.9  | 0.1 | L | COG3344                 | Retron-type reverse transcriptase                                                                                                                                                                           |
| TS28Bac8191 CDS CDS     | 2.7  | 109.2 | 0.1 | L | COG1484                 | DNA replication protein                                                                                                                                                                                     |
| TS28Clo02127 CDS CDS    | 1.0  | 40.0  | 0.1 | L | COG0675                 | Transposase and inactivated derivatives                                                                                                                                                                     |
| TS28Fae15426 CDS CDS    | 1.0  | 40.0  | 0.1 | L | COG0593                 | ATPase involved in DNA replication initiation                                                                                                                                                               |
| TS28Clo00872 CDS CDS    | 5.0  | 201.0 | 0.1 | L | COG1961                 | Site-specific recombinases, DNA invertase Pin homologs                                                                                                                                                      |
| TS28Fae22378 CDS CDS    | 1.5  | 61.0  | 0.1 | L | COG4974 COG0582         | Site-specific recombinase XerD Integrase                                                                                                                                                                    |
| TS28RumUnc0317 CDS CDS  | 0.7  | 27.2  | 0.1 | L | COG1961                 | Site-specific recombinases, DNA invertase Pin homologs                                                                                                                                                      |
| FpraM2121397 CDS CDS    | 10.5 | 432.0 | 0.1 | L | COG1961                 | Site-specific recombinases, DNA invertase Pin homologs                                                                                                                                                      |
| TS28Clo00639 CDS CDS    | 3.0  | 124.0 | 0.1 | L | COG1961                 | Site-specific recombinases, DNA invertase Pin homologs                                                                                                                                                      |
| TS28Eub8222 CDS CDS     | 1.5  | 62.0  | 0.1 | L | COG0188                 | Type IIA topoisomerase (DNA gyrase/topo II, topoisomerase IV), A subunit                                                                                                                                    |
| TS28Clo01309 CDS CDS    | 6.0  | 249.0 | 0.1 | L | COG0187                 | Type IIA topoisomerase (DNA gyrase/topo II, topoisomerase IV), B subunit                                                                                                                                    |
| TS28Fae20092 CDS CDS    | 2.0  | 83.5  | 0.1 | L | COG0323                 | DNA mismatch repair enzyme (predicted ATPase)                                                                                                                                                               |
| TS29Dor1974 CDS CDS     | 0.8  | 31.4  | 0.1 | L | COG3344                 | Retron-type reverse transcriptase                                                                                                                                                                           |
| TS28Eub6661 CDS CDS     | 1.0  | 42.0  | 0.1 | L | COG4974 COG0582 COG4973 | Site-specific recombinase XerD Integrase Site-specific recombinase XerC                                                                                                                                     |
| TS29Rum17160 CDS CDS    | 1.0  | 42.5  | 0.1 | L | COG0305                 | Replicative DNA helicase                                                                                                                                                                                    |
| TS28Clo00742 CDS CDS    | 8.0  | 343.0 | 0.1 | L | COG0249                 | Mismatch repair ATPase (MutS family)                                                                                                                                                                        |
| TS28Fae22543 CDS CDS    | 1.0  | 43.0  | 0.1 | L | COG3857                 | ATP-dependent nuclease, subunit B                                                                                                                                                                           |
| Dlon1636 CDS CDS        | 1.3  | 58.7  | 0.1 | L | COG4974 COG0582         | Site-specific recombinase XerD Integrase                                                                                                                                                                    |
| FpraM2120693 CDS CDS    | 1.3  | 55.5  | 0.1 | L | COG2189                 | Adenine specific DNA methylase Mod                                                                                                                                                                          |
| TS28Eub5322 CDS CDS     | 2.0  | 88.8  | 0.1 | L | COG0749                 | DNA polymerase I - 3'-5' exonuclease and polymerase domains                                                                                                                                                 |
| TS28Clo0008 CDS CDS     | 1.0  | 45.0  | 0.1 | L | COG3593                 | Predicted ATP-dependent endonuclease of the OLD family                                                                                                                                                      |
| TS28Eub8102 CDS CDS     | 1.0  | 45.0  | 0.1 | L | COG2801 COG2963         | Transposase and inactivated derivatives Transposase and inactivated derivatives                                                                                                                             |
| TS28Met0340 CDS CDS     | 0.3  | 15.0  | 0.1 | L | COG0116 COG1041         | Predicted N6-adenine-specific DNA methylase Predicted DNA modification methylase                                                                                                                            |
| TS28Clo01484 CDS CDS    | 4.0  | 181.0 | 0.1 | L | COG1961                 | Site-specific recombinases, DNA invertase Pin homologs                                                                                                                                                      |
| Msmi740925 CDS CDS      | 0.3  | 11.3  | 0.1 | L | COG0551 COG0210 COG1599 | Zn-finger domain associated with topoisomerase type I Superfamily I DNA and RNA helicases Single-stranded DNA-binding replication protein A (RPA), large (70 kD) subunit and related ssDNA-binding proteins |
| TS29Rum19567 CDS CDS    | 1.0  | 45.8  | 0.1 | L | COG1961                 | Site-specific recombinases, DNA invertase Pin homologs                                                                                                                                                      |
| TS28Bif3472 CDS CDS     | 1.0  | 45.8  | 0.1 | L | COG1643                 | HrpA-like helicases                                                                                                                                                                                         |
| TS28Dor2622 CDS CDS     | 1.3  | 61.2  | 0.1 | L | COG0582                 | Integrase                                                                                                                                                                                                   |
| TS28Clo00768 CDS CDS    | 2.0  | 92.0  | 0.1 | L | COG1381                 | Recombinational DNA repair protein (RecF pathway)                                                                                                                                                           |
| TS28Fae08139 CDS CDS    | 1.0  | 46.0  | 0.1 | L | COG0749                 | DNA polymerase I - 3'-5' exonuclease and polymerase domains                                                                                                                                                 |
| FpraM2122493 CDS CDS    | 0.4  | 20.7  | 0.1 | L | COG0507                 | ATP-dependent exoDNase (exonuclease V), alpha subunit - helicase superfamily I member                                                                                                                       |
| TS28Eub8038 CDS CDS     | 2.0  | 93.5  | 0.1 | L | COG0210                 | Superfamily I DNA and RNA helicases                                                                                                                                                                         |
| TS28Clo01016 CDS CDS    | 8.0  | 378.0 | 0.1 | L | COG3886                 | Predicted HKD family nuclease                                                                                                                                                                               |
| Ehal0368 CDS CDS        | 2.7  | 127.5 | 0.1 | L | COG0389                 | Nucleotidyltransferase/DNA polymerase involved in DNA repair                                                                                                                                                |
| TS29Fae02067 CDS CDS    | 0.5  | 24.0  | 0.1 | L | COG0497                 | ATPase involved in DNA repair                                                                                                                                                                               |
| Bcap2730 CDS CDS        | 1.0  | 48.5  | 0.1 | L | COG0178                 | Excinuclease ATPase subunit                                                                                                                                                                                 |
| TS28Eub4034 CDS CDS     | 1.0  | 49.0  | 0.1 | L | COG3857                 | ATP-dependent nuclease, subunit B                                                                                                                                                                           |
| TS28Eub1506 CDS CDS     | 3.0  | 147.0 | 0.1 | L | COG0556                 | Helicase subunit of the DNA excision repair complex                                                                                                                                                         |
| TS28Fae19299 CDS CDS    | 1.3  | 61.5  | 0.1 | L | COG2189                 | Adenine specific DNA methylase Mod                                                                                                                                                                          |
| TS29Rum19926 CDS CDS    | 1.0  | 49.5  | 0.1 | L | COG0188                 | Type IIA topoisomerase (DNA gyrase/topo II, topoisomerase IV), A subunit                                                                                                                                    |
| TS28Rum12508 CDS CDS    | 1.5  | 75.0  | 0.1 | L | COG0587                 | DNA polymerase III, alpha subunit                                                                                                                                                                           |
| TS28Clo00694 CDS CDS    | 2.0  | 100.0 | 0.1 | L | COG0507                 | ATP-dependent exoDNase (exonuclease V), alpha subunit - helicase superfamily I member                                                                                                                       |
| TS28Fae20680 CDS CDS    | 0.5  | 25.0  | 0.1 | L | COG0210                 | Superfamily I DNA and RNA helicases                                                                                                                                                                         |
| TS28Eub4620 CDS CDS     | 1.5  | 75.5  | 0.1 | L | COG0249                 | Mismatch repair ATPase (MutS family)                                                                                                                                                                        |
| TS29Rum13789 CDS CDS    | 1.0  | 50.5  | 0.1 | L | COG2826                 | Transposase and inactivated derivatives, IS30 family                                                                                                                                                        |
| Robe3832 CDS CDS        | 1.3  | 65.2  | 0.1 | L | COG2946                 | Putative phage replication protein RstA                                                                                                                                                                     |
| RintL11218 CDS CDS      | 1.0  | 51.0  | 0.1 | L | COG4974 COG0582         | Site-specific recombinase XerD Integrase                                                                                                                                                                    |
| TS28Bac6549 CDS CDS     | 0.3  | 17.3  | 0.1 | L | COG0305                 | Replicative DNA helicase                                                                                                                                                                                    |
| PRABACT10HN0078 CDS CDS | 1.0  | 53.0  | 0.1 | L | COG4974 COG0582         | Site-specific recombinase XerD Integrase                                                                                                                                                                    |
| TS28Clo09295 CDS CDS    | 1.0  | 53.0  | 0.1 | L | COG3857                 | ATP-dependent nuclease, subunit B                                                                                                                                                                           |
| TS28Clo0535 CDS CDS     | 2.0  | 106.0 | 0.1 | L | COG3547                 | Transposase and inactivated derivatives                                                                                                                                                                     |
| TS28Clo00674 CDS CDS    | 2.0  | 106.0 | 0.1 | L | COG0266                 | Formamidopyrimidine-DNA glycosylase                                                                                                                                                                         |
| TS28Eub0269 CDS CDS     | 0.5  | 27.0  | 0.1 | L | COG1484                 | DNA replication protein                                                                                                                                                                                     |
| TS28Bac0448 CDS CDS     | 0.3  | 18.0  | 0.1 | L | COG0420                 | DNA repair exonuclease                                                                                                                                                                                      |
| Bdor0430 CDS CDS        | 0.3  | 18.0  | 0.1 | L | COG0178                 | Excinuclease ATPase subunit                                                                                                                                                                                 |
| Ccom2074 CDS CDS        | 1.1  | 59.7  | 0.1 | L | COG0507                 | ATP-dependent exoDNase (exonuclease V), alpha subunit - helicase superfamily I member                                                                                                                       |
| RintL10505 CDS CDS      | 1.3  | 68.7  | 0.1 | L | COG0582                 | Integrase                                                                                                                                                                                                   |
| TS28Clo01306 CDS CDS    | 4.0  | 218.0 | 0.1 | L | COG2812                 | DNA polymerase III, gamma/tau subunits                                                                                                                                                                      |
| Bean2375 CDS CDS        | 0.5  | 27.5  | 0.1 | L | COG3935                 | Putative primosome component and related proteins                                                                                                                                                           |
| TS28Eub7196 CDS CDS     | 1.0  | 55.5  | 0.1 | L | COG1573                 | Uracil-DNA glycosylase                                                                                                                                                                                      |
| TS28Fae21539 CDS CDS    | 1.0  | 55.8  | 0.1 | L | COG0592                 | DNA polymerase sliding clamp subunit (PCNA homolog)                                                                                                                                                         |
| TS28Clo01332 CDS CDS    | 1.0  | 56.0  | 0.1 | L | COG0629                 | Single-stranded DNA-binding protein                                                                                                                                                                         |
| Bdor0019 CDS CDS        | 0.3  | 19.0  | 0.1 | L | COG0323                 | DNA mismatch repair enzyme (predicted ATPase)                                                                                                                                                               |
| TS28Eub7283 CDS CDS     | 1.0  | 57.0  | 0.1 | L | COG0270                 | Site-specific DNA methylase                                                                                                                                                                                 |
| Ccom0035 CDS CDS        | 1.0  | 58.0  | 0.1 | L | COG3547                 | Transposase and inactivated derivatives                                                                                                                                                                     |
| TS29Rum17166 CDS CDS    | 0.5  | 29.0  | 0.1 | L | COG0629                 | Single-stranded DNA-binding protein                                                                                                                                                                         |
| TS28Fae13421 CDS CDS    | 0.5  | 29.0  | 0.1 | L | COG0514                 | Superfamily II DNA helicase                                                                                                                                                                                 |
| TS28Fae15421 CDS CDS    | 0.5  | 30.0  | 0.1 | L | COG0187                 | Type IIA topoisomerase (DNA gyrase/topo II, topoisomerase IV), B subunit                                                                                                                                    |
| TS28Clo01308 CDS CDS    | 6.0  | 367.0 | 0.1 | L | COG0188                 | Type IIA topoisomerase (DNA gyrase/topo II, topoisomerase IV), A subunit                                                                                                                                    |
| TS28Clo00644 CDS CDS    | 4.0  | 245.0 | 0.1 | L | COG0550 COG0551 COG1754 | Topoisomerase IA Zn-finger domain associated with topoisomerase type I Uncharacterized C-terminal domain of topoisomerase IA                                                                                |
| CspS20175 CDS CDS       | 0.1  | 6.2   | 0.1 | L | COG0582                 | Integrase                                                                                                                                                                                                   |

|                        |     |       |      |     |                                 |                                                                                                                                                                                                 |
|------------------------|-----|-------|------|-----|---------------------------------|-------------------------------------------------------------------------------------------------------------------------------------------------------------------------------------------------|
| CspM6212150 CDS CDS    | 0.1 | 6.2   | 0.1  | L   | COG0582                         | Integrase                                                                                                                                                                                       |
| RintL13994 CDS CDS     | 1.3 | 79.5  | 0.1  | L   | COG2946                         | Putative phage replication protein RstA                                                                                                                                                         |
| TS29Rum20070 CDS CDS   | 1.0 | 62.0  | 0.1  | L   | COG0389                         | Nucleotidyltransferase/DNA polymerase involved in DNA repair                                                                                                                                    |
| Rgna2448 CDS CDS       | 1.3 | 79.2  | 0.1  | L   | COG0582                         | Integrase                                                                                                                                                                                       |
| TS28Eub8662 CDS CDS    | 1.0 | 63.0  | 0.1  | L   | COG1570                         | Exonuclease VII, large subunit                                                                                                                                                                  |
| TS29Fae09550 CDS CDS   | 1.5 | 95.5  | 0.1  | L   | COG4974 COG0582                 | Site-specific recombinase XerD Integrase                                                                                                                                                        |
| Ccom2343 CDS CDS       | 1.0 | 66.0  | 0.1  | L   | COG1961                         | Site-specific recombinases, DNA invertase Pin homologs                                                                                                                                          |
| TS28Dor3157 CDS CDS    | 0.5 | 34.0  | 0.0  | L   | COG0178                         | Excinuclease ATPase subunit                                                                                                                                                                     |
| Rlac0724 CDS CDS       | 1.3 | 86.7  | 0.0  | L   | COG0582                         | Integrase                                                                                                                                                                                       |
| Ebi0586 CDS CDS        | 1.3 | 85.7  | 0.0  | L   | COG3344                         | Retron-type reverse transcriptase                                                                                                                                                               |
| TS29Rum16055 CDS CDS   | 1.0 | 70.0  | 0.0  | L   | COG0419                         | ATPase involved in DNA repair                                                                                                                                                                   |
| Hfil2883 CDS CDS       | 1.0 | 73.5  | 0.0  | L   | COG0507                         | ATP-dependent exoDNase (exonuclease V), alpha subunit - helicase superfamily I member                                                                                                           |
| TS28Eub0075 CDS CDS    | 0.7 | 49.2  | 0.0  | L   | COG1961                         | Site-specific recombinases, DNA invertase Pin homologs                                                                                                                                          |
| TS28Clo06652 CDS CDS   | 3.0 | 223.0 | 0.0  | L   | COG0322                         | Nuclease subunit of the excinuclease complex                                                                                                                                                    |
| TS28Clo01312 CDS CDS   | 2.0 | 151.0 | 0.0  | L   | COG0592                         | DNA polymerase sliding clamp subunit (PCNA homolog)                                                                                                                                             |
| TS29Rum21113 CDS CDS   | 0.5 | 38.0  | 0.0  | L   | COG0535 COG0084                 | Predicted Fe-S oxidoreductases Mg-dependent DNase                                                                                                                                               |
| TS28Eub7056 CDS CDS    | 1.0 | 77.0  | 0.0  | L   | COG2826                         | Transposase and inactivated derivatives, IS30 family                                                                                                                                            |
| Dfor3100 CDS CDS       | 1.8 | 135.5 | 0.0  | L   | COG0507                         | ATP-dependent exoDNase (exonuclease V), alpha subunit - helicase superfamily I member                                                                                                           |
| TS28Rum10639 CDS CDS   | 0.3 | 25.8  | 0.0  | L   | COG0272                         | NAD-dependent DNA ligase (contains BRCT domain type II)                                                                                                                                         |
| TS29Rum11531 CDS CDS   | 0.5 | 39.0  | 0.0  | L   | COG0389                         | Nucleotidyltransferase/DNA polymerase involved in DNA repair                                                                                                                                    |
| TS28Fae22424 CDS CDS   | 1.7 | 132.0 | 0.0  | L   | COG3344                         | Retron-type reverse transcriptase                                                                                                                                                               |
| TS28Eub7005 CDS CDS    | 1.5 | 119.0 | 0.0  | L   | COG0322                         | Nuclease subunit of the excinuclease complex                                                                                                                                                    |
| CspSS21757 CDS CDS     | 1.2 | 96.2  | 0.0  | L   | COG2946                         | Putative phage replication protein RstA                                                                                                                                                         |
| TS28Clo06673 CDS CDS   | 4.0 | 326.0 | 0.0  | L   | COG0749                         | DNA polymerase 1 - 3'-5' exonuclease and polymerase domains                                                                                                                                     |
| TS28Clo01577 CDS CDS   | 3.0 | 249.0 | 0.0  | L   | COG0210                         | Superfamily I DNA and RNA helicases                                                                                                                                                             |
| TS28Fae22387 CDS CDS   | 1.0 | 84.0  | 0.0  | L   | COG3886 COG4889                 | Predicted HKD family nuclease Predicted helicase                                                                                                                                                |
| TS28RumUnc1796 CDS CDS | 1.0 | 85.5  | 0.0  | L   | COG3547                         | Transposase and inactivated derivatives                                                                                                                                                         |
| TS28Rum15611 CDS CDS   | 0.5 | 43.0  | 0.0  | L   | COG0187                         | Type IIA topoisomerase (DNA gyrase/topo II, topoisomerase IV), B subunit                                                                                                                        |
| Ehal2601 CDS CDS       | 4.0 | 349.0 | 0.0  | L   | COG2801 COG2963                 | Transposase and inactivated derivatives Transposase and inactivated derivatives                                                                                                                 |
| TS28Clo06695 CDS CDS   | 2.0 | 175.0 | 0.0  | L   | COG0507                         | ATP-dependent exoDNase (exonuclease V), alpha subunit - helicase superfamily I member                                                                                                           |
| TS28Fae15419 CDS CDS   | 0.3 | 23.0  | 0.0  | L   | COG0188                         | Type IIA topoisomerase (DNA gyrase/topo II, topoisomerase IV), A subunit                                                                                                                        |
| CspL22444 CDS CDS      | 1.3 | 119.5 | 0.0  | L   | COG0582                         | Integrase                                                                                                                                                                                       |
| TS29Fae10383 CDS CDS   | 0.5 | 47.5  | 0.0  | L   | COG3935                         | Putative primosome component and related proteins                                                                                                                                               |
| Cnex1410 CDS CDS       | 0.3 | 32.5  | 0.0  | L   | COG4974 COG0582                 | Site-specific recombinase XerD Integrase                                                                                                                                                        |
| TS28Bac7421 CDS CDS    | 0.5 | 48.8  | 0.0  | L   | COG0582                         | Integrase                                                                                                                                                                                       |
| Bhan2466 CDS CDS       | 0.3 | 26.2  | 0.0  | L   | COG3344                         | Retron-type reverse transcriptase                                                                                                                                                               |
| Rgna0713 CDS CDS       | 0.3 | 26.2  | 0.0  | L   | COG3344                         | Retron-type reverse transcriptase                                                                                                                                                               |
| Cnex0946 CDS CDS       | 0.3 | 31.2  | 0.0  | L   | COG2946                         | Putative phage replication protein RstA                                                                                                                                                         |
| Bryfor2985 CDS CDS     | 0.5 | 57.5  | 0.0  | L   | COG2801 COG3344                 | Transposase and inactivated derivatives Retron-type reverse transcriptase                                                                                                                       |
| TS28Eub4573 CDS CDS    | 0.7 | 81.0  | 0.0  | L   | COG0210 COG1074                 | Superfamily I DNA and RNA helicases ATP-dependent exoDNase (exonuclease V) beta subunit (contains helicase and exonuclease domains)                                                             |
| TS28Clo00711 CDS CDS   | 1.0 | 122.0 | 0.0  | L   | COG1039                         | Ribonuclease HIII                                                                                                                                                                               |
| CspSS21813 CDS CDS     | 2.0 | 249.8 | 0.0  | L   | COG2946                         | Putative phage replication protein RstA                                                                                                                                                         |
| TS28Fae09681 CDS CDS   | 0.2 | 25.0  | 0.0  | L   | COG0468                         | RecA/RadA recombinase                                                                                                                                                                           |
| TS28Eub5249 CDS CDS    | 0.3 | 43.3  | 0.0  | L   | COG0468                         | RecA/RadA recombinase                                                                                                                                                                           |
| Rgna2452 CDS CDS       | 0.8 | 117.5 | 0.0  | L   | COG0507                         | ATP-dependent exoDNase (exonuclease V), alpha subunit - helicase superfamily I member                                                                                                           |
| TS29Rum11761 CDS CDS   | 1.0 | 145.0 | 0.0  | L   | COG0587                         | DNA polymerase III, alpha subunit                                                                                                                                                               |
| Rlac0721 CDS CDS       | 0.8 | 121.4 | 0.0  | L   | COG0507                         | ATP-dependent exoDNase (exonuclease V), alpha subunit - helicase superfamily I member                                                                                                           |
| CspL22448 CDS CDS      | 0.8 | 121.7 | 0.0  | L   | COG0507                         | ATP-dependent exoDNase (exonuclease V), alpha subunit - helicase superfamily I member                                                                                                           |
| TS28Rum02257 CDS CDS   | 1.0 | 147.5 | 0.0  | L   | COG4974 COG0582                 | Site-specific recombinase XerD Integrase                                                                                                                                                        |
| Ccom0774 CDS CDS       | 1.0 | 149.5 | 0.0  | L   | COG3547                         | Transposase and inactivated derivatives                                                                                                                                                         |
| TS28Clo01600 CDS CDS   | 2.0 | 308.0 | 0.0  | L   | COG1198                         | Primosomal protein N' (replication factor Y) - superfamily II helicase                                                                                                                          |
| TS28Eub5722 CDS CDS    | 1.0 | 162.0 | 0.0  | L   | COG1112                         | Superfamily I DNA and RNA helicases and helicase subunits                                                                                                                                       |
| RintL10347 CDS CDS     | 0.1 | 16.4  | 0.0  | L   | COG0582                         | Integrase                                                                                                                                                                                       |
| Hfil2877 CDS CDS       | 0.5 | 91.3  | 0.0  | L   | COG1961                         | Site-specific recombinases, DNA invertase Pin homologs                                                                                                                                          |
| TS28Clo01555 CDS CDS   | 1.0 | 210.0 | 0.0  | L   | COG1961                         | Site-specific recombinases, DNA invertase Pin homologs                                                                                                                                          |
| Cbo13901 CDS CDS       | 0.5 | 110.5 | 0.0  | L   | COG0507                         | ATP-dependent exoDNase (exonuclease V), alpha subunit - helicase superfamily I member                                                                                                           |
| TS28Rum15759 CDS CDS   | 0.3 | 128.0 | 0.0  | L   | COG1961                         | Site-specific recombinases, DNA invertase Pin homologs                                                                                                                                          |
| TS29Rum14797 CDS CDS   | 2.0 | 0.3   | 19.8 | L B | COG0550 COG0551 COG5531 COG1754 | Topoisomerase IA Zn-finger domain associated with topoisomerase type I SWIB-domain-containing proteins implicated in chromatin remodeling Uncharacterized C-terminal domain of topoisomerase IA |
| TS28Par0305 CDS CDS    | 8.0 | 1.5   | 17.6 | L B | COG0550 COG0551 COG5531         | Topoisomerase IA Zn-finger domain associated with topoisomerase type I SWIB-domain-containing proteins implicated in chromatin remodeling                                                       |
| TS29RumUnc1287 CDS CDS | 1.0 | 33.3  | 0.1  | L B | COG0550 COG0551 COG5531         | Topoisomerase IA Zn-finger domain associated with topoisomerase type I SWIB-domain-containing proteins implicated in chromatin remodeling                                                       |
| TS28Fae13913 CDS CDS   | 0.5 | 19.0  | 0.1  | L B | COG0550 COG0551 COG5531         | Topoisomerase IA Zn-finger domain associated with topoisomerase type I SWIB-domain-containing proteins implicated in chromatin remodeling                                                       |
| Csci0096 CDS CDS       | 0.2 | 8.5   | 0.1  | L B | COG0550 COG0551 COG5531         | Topoisomerase IA Zn-finger domain associated with topoisomerase type I SWIB-domain-containing proteins implicated in chromatin remodeling                                                       |
| Bint0768 CDS CDS       | 0.5 | 20.3  | 0.1  | L B | COG0550 COG0551 COG5531         | Topoisomerase IA Zn-finger domain associated with topoisomerase type I SWIB-domain-containing proteins implicated in chromatin remodeling                                                       |

|                      |       |       |       |       |                                 |                                                                                                                                                                                                 |
|----------------------|-------|-------|-------|-------|---------------------------------|-------------------------------------------------------------------------------------------------------------------------------------------------------------------------------------------------|
| Even0438 CDS CDS     | 3.0   | 123.5 | 0.1   | L B   | COG0550 COG0551 COG5531         | Topoisomerase IA Zn-finger domain associated with topoisomerase type I SWIB-domain-containing proteins implicated in chromatin remodeling                                                       |
| TS28Fae15514 CDS CDS | 1.0   | 50.0  | 0.1   | L B   | COG0550 COG0551 COG5531 COG1754 | Topoisomerase IA Zn-finger domain associated with topoisomerase type I SWIB-domain-containing proteins implicated in chromatin remodeling Uncharacterized C-terminal domain of topoisomerase IA |
| Bsp1160232 CDS CDS   | 0.3   | 17.0  | 0.1   | L B   | COG0550 COG0551 COG5531         | Topoisomerase IA Zn-finger domain associated with topoisomerase type I SWIB-domain-containing proteins implicated in chromatin remodeling                                                       |
| Bthe3732593 CDS CDS  | 0.5   | 30.1  | 0.1   | L B   | COG0550 COG0551 COG5531         | Topoisomerase IA Zn-finger domain associated with topoisomerase type I SWIB-domain-containing proteins implicated in chromatin remodeling                                                       |
| TS28Eub6491 CDS CDS  | 1.0   | 76.0  | 0.0   | L B   | COG0550 COG0551 COG5531         | Topoisomerase IA Zn-finger domain associated with topoisomerase type I SWIB-domain-containing proteins implicated in chromatin remodeling                                                       |
| TS28Clo10822 CDS CDS | 0.2   | 16.0  | 0.0   | L B   | COG0550 COG0551 COG5531         | Topoisomerase IA Zn-finger domain associated with topoisomerase type I SWIB-domain-containing proteins implicated in chromatin remodeling                                                       |
| TS29Rum20503 CDS CDS | 0.5   | 55.0  | 0.0   | L B   | COG0550 COG0551 COG5531         | Topoisomerase IA Zn-finger domain associated with topoisomerase type I SWIB-domain-containing proteins implicated in chromatin remodeling                                                       |
| FpraM2121396 CDS CDS | 0.5   | 67.5  | 0.0   | L B   | COG0550 COG0551 COG5531         | Topoisomerase IA Zn-finger domain associated with topoisomerase type I SWIB-domain-containing proteins implicated in chromatin remodeling                                                       |
| TS28Rum16465 CDS CDS | 1.0   | 147.0 | 0.0   | L B   | COG0550 COG0551 COG5531         | Topoisomerase IA Zn-finger domain associated with topoisomerase type I SWIB-domain-containing proteins implicated in chromatin remodeling                                                       |
| TS29Rum19622 CDS CDS | 0.9   | 190.6 | 0.0   | L B   | COG0550 COG0551 COG5531         | Topoisomerase IA Zn-finger domain associated with topoisomerase type I SWIB-domain-containing proteins implicated in chromatin remodeling                                                       |
| Csei3151 CDS CDS     | 0.2   | 45.2  | 0.0   | L B   | COG0550 COG0551 COG5531         | Topoisomerase IA Zn-finger domain associated with topoisomerase type I SWIB-domain-containing proteins implicated in chromatin remodeling                                                       |
| Cbol3089 CDS CDS     | 0.2   | 60.2  | 0.0   | L B   | COG0550 COG0551 COG5531         | Topoisomerase IA Zn-finger domain associated with topoisomerase type I SWIB-domain-containing proteins implicated in chromatin remodeling                                                       |
| TS28Bac8435 CDS CDS  | 1.0   | 55.0  | 0.1   | L D Z | COG0419 COG5022 COG1196         | ATPase involved in DNA repair Myosin heavy chain Chromosome segregation ATPases                                                                                                                 |
| Csei1586 CDS CDS     | 14.0  | 1.0   | 46.3  | L F   | COG1372 COG1328 COG0209         | Intein/homing endonuclease Oxygen-sensitive ribonucleoside-triphosphate reductase Ribonucleotide reductase, alpha subunit                                                                       |
| Bryfor3487 CDS CDS   | 6.0   | 1.0   | 19.8  | L F   | COG1372 COG1328                 | Intein/homing endonuclease Oxygen-sensitive ribonucleoside-triphosphate reductase                                                                                                               |
| Acol1170 CDS CDS     | 5.0   | 1.0   | 16.5  | L F   | COG1372 COG0209                 | Intein/homing endonuclease Ribonucleotide reductase, alpha subunit                                                                                                                              |
| Msmi740807 CDS CDS   | 5.3   | 1.3   | 14.1  | L G   | COG1372 COG0574                 | Intein/homing endonuclease Phosphoenolpyruvate synthase pyruvate phosphate dikinase                                                                                                             |
| Begg0139 CDS CDS     | 7.0   | 2.0   | 11.6  | L I   | COG0494 COG1443                 | NTP pyrophosphohydrolases including oxidative damage repair enzymes Isopentenylidiphosphate isomerase                                                                                           |
| Msmi740319 CDS CDS   | 2.5   | 0.3   | 33.1  | L O   | COG1474                         | Cdc6-related protein, AAA superfamily ATPase                                                                                                                                                    |
| Msmi751365 CDS CDS   | 3.2   | 0.8   | 14.0  | L O   | COG1474                         | Cdc6-related protein, AAA superfamily ATPase                                                                                                                                                    |
| Robe2649 CDS CDS     | 1.6   | 54.5  | 0.1   | L U   | COG1961 COG2948                 | Site-specific recombinases, DNA invertase Pin homologs Type IV secretory pathway, VirB10 components                                                                                             |
| FpraM2120213 CDS CDS | 1.1   | 36.0  | 0.1   | L U   | COG1961 COG2948                 | Site-specific recombinases, DNA invertase Pin homologs Type IV secretory pathway, VirB10 components                                                                                             |
| FpraM2122491 CDS CDS | 0.4   | 15.7  | 0.1   | L U   | COG1961 COG2948                 | Site-specific recombinases, DNA invertase Pin homologs Type IV secretory pathway, VirB10 components                                                                                             |
| TS28Fae16408 CDS CDS | 0.5   | 29.0  | 0.1   | L U   | COG0758                         | Predicted Rossmann fold nucleotide-binding protein involved in DNA uptake                                                                                                                       |
| CspM6211944 CDS CDS  | 2.8   | 200.2 | 0.0   | L U   | COG3505 COG1961                 | Type IV secretory pathway, VirD4 components Site-specific recombinases, DNA invertase Pin homologs                                                                                              |
| TS28Fae00187 CDS CDS | 0.3   | 31.0  | 0.0   | L U   | COG1961 COG2948                 | Site-specific recombinases, DNA invertase Pin homologs Type IV secretory pathway, VirB10 components                                                                                             |
| Rtor1326 CDS CDS     | 0.7   | 103.9 | 0.0   | L U   | COG3505 COG1961                 | Type IV secretory pathway, VirD4 components Site-specific recombinases, DNA invertase Pin homologs                                                                                              |
| Acol2738 CDS CDS     | 3.0   | 530.6 | 0.0   | L U   | COG3505 COG1961                 | Type IV secretory pathway, VirD4 components Site-specific recombinases, DNA invertase Pin homologs                                                                                              |
| Robe2672 CDS CDS     | 0.7   | 124.4 | 0.0   | L U   | COG3505 COG1961                 | Type IV secretory pathway, VirD4 components Site-specific recombinases, DNA invertase Pin homologs                                                                                              |
| Msmi741122 CDS CDS   | 3.7   | 1.0   | 12.1  | L V   | COG3666 COG1131                 | Transposase and inactivated derivatives ABC-type multidrug transport system, ATPase component                                                                                                   |
| TS28Rum07177 CDS CDS | 131.5 | 2.0   | 217.4 | M     | COG3764                         | Sortase (surface protein transpeptidase)                                                                                                                                                        |
| Msmi750501 CDS CDS   | 11.3  | 0.3   | 149.9 | M     | COG3475                         | LPS biosynthesis protein                                                                                                                                                                        |
| Msmi741174 CDS CDS   | 11.3  | 0.3   | 149.9 | M     | COG3475                         | LPS biosynthesis protein                                                                                                                                                                        |
| Casp3572 CDS CDS     | 45.0  | 1.0   | 148.8 | M     | COG1686                         | D-alanyl-D-alanine carboxypeptidase                                                                                                                                                             |
| Rtor1960 CDS CDS     | 131.5 | 3.0   | 145.0 | M     | COG3764                         | Sortase (surface protein transpeptidase)                                                                                                                                                        |
| Dfor2251 CDS CDS     | 40.0  | 2.0   | 66.1  | M     | COG0438                         | Glycosyltransferase                                                                                                                                                                             |
| Msmi741275 CDS CDS   | 24.3  | 1.5   | 53.5  | M     | COG1087                         | UDP-glucose 4-epimerase                                                                                                                                                                         |
| Pmer2386 CDS CDS     | 13.0  | 1.0   | 43.0  | M     | COG0463                         | Glycosyltransferases involved in cell wall biogenesis                                                                                                                                           |
| Msmi741230 CDS CDS   | 14.3  | 1.2   | 40.6  | M     | COG1210                         | UDP-glucose pyrophosphorylase                                                                                                                                                                   |
| TS29Bac04981 CDS CDS | 3.0   | 0.3   | 39.7  | M     | COG1089                         | GDP-D-mannose dehydratase                                                                                                                                                                       |
| TS29Fae08403 CDS CDS | 11.5  | 1.0   | 38.0  | M     | COG0791                         | Cell wall-associated hydrolases (invasion-associated proteins)                                                                                                                                  |
| Dfor2764 CDS CDS     | 11.0  | 1.0   | 36.4  | M     | COG2088                         | Uncharacterized protein, involved in the regulation of septum location                                                                                                                          |
| Bste0130 CDS CDS     | 5.5   | 0.5   | 36.4  | M     | COG0845                         | Membrane-fusion protein                                                                                                                                                                         |
| Bfra31123865 CDS CDS | 5.4   | 0.5   | 35.5  | M     | COG3209                         | Rhs family protein                                                                                                                                                                              |
| TS29Fae08028 CDS CDS | 5.0   | 0.5   | 33.1  | M     | COG3757                         | Lysozyme MI (1,4-beta-N-acetylglucosaminidase)                                                                                                                                                  |
| Bxy14005 CDS CDS     | 5.0   | 0.5   | 33.1  | M     | COG2885                         | Outer membrane protein and related peptidoglycan-associated (lipo)proteins                                                                                                                      |
| Svar0805 CDS CDS     | 10.0  | 1.0   | 33.1  | M     | COG0399                         | Predicted pyridoxal phosphate-dependent enzyme apparently involved in regulation of cell wall biogenesis                                                                                        |
| TS29Fae01172 CDS CDS | 9.5   | 1.0   | 31.4  | M     | COG5434                         | Endonolvgalacturonase                                                                                                                                                                           |

|                      |      |      |      |   |                 |                                                                                                                                                                 |
|----------------------|------|------|------|---|-----------------|-----------------------------------------------------------------------------------------------------------------------------------------------------------------|
| Bdor0862 CDS CDS     | 24.5 | 2.7  | 30.4 | M | COG1087         | UDP-glucose 4-epimerase                                                                                                                                         |
| Msmi750406 CDS CDS   | 24.3 | 2.8  | 28.3 | M | COG1087         | UDP-glucose 4-epimerase                                                                                                                                         |
| TS29Fae05583 CDS CDS | 8.5  | 1.0  | 28.1 | M | COG0750         | Predicted membrane-associated Zn-dependent proteases 1                                                                                                          |
| Bste2165 CDS CDS     | 8.5  | 1.0  | 28.1 | M | COG0463         | Glycosyltransferases involved in cell wall biogenesis                                                                                                           |
| Ehal1689 CDS CDS     | 4.0  | 0.5  | 26.5 | M | COG3409 COG1376 | Putative peptidoglycan-binding domain-containing protein Uncharacterized protein conserved in bacteria                                                          |
| BactD21100 CDS CDS   | 8.0  | 1.0  | 26.5 | M | COG1560         | Lauroyl/myristoyl acyltransferase                                                                                                                               |
| TS28Clo00100 CDS CDS | 4.0  | 0.5  | 26.5 | M | COG1209         | dTDP-glucose pyrophosphorylase                                                                                                                                  |
| TS29Fae06305 CDS CDS | 4.0  | 0.5  | 26.5 | M | COG1207         | N-acetylglucosamine-1-phosphate uridylyltransferase (contains nucleotidyltransferase and 1-patch acetyltransferase domains)                                     |
| CspL21787 CDS CDS    | 4.0  | 0.5  | 26.5 | M | COG1087         | UDP-glucose 4-epimerase                                                                                                                                         |
| Pmer0411 CDS CDS     | 31.0 | 4.0  | 25.6 | M | COG2148         | Sugar transferases involved in lipopolysaccharide synthesis                                                                                                     |
| Bthe3733491 CDS CDS  | 3.8  | 0.5  | 25.4 | M | COG3209         | Rhs family protein                                                                                                                                              |
| Bxyl0277 CDS CDS     | 2.3  | 0.3  | 23.1 | M | COG1088         | dTDP-D-glucose 4,6-dehydratase                                                                                                                                  |
| BactD11851 CDS CDS   | 2.3  | 0.3  | 23.1 | M | COG1088         | dTDP-D-glucose 4,6-dehydratase                                                                                                                                  |
| BactD23416 CDS CDS   | 3.5  | 0.5  | 23.1 | M | COG0845         | Membrane-fusion protein                                                                                                                                         |
| RintL13032 CDS CDS   | 7.0  | 1.0  | 23.1 | M | COG0739         | Membrane proteins related to metalloendopeptidases                                                                                                              |
| TS29Bac06222 CDS CDS | 3.3  | 0.5  | 22.0 | M | COG5434         | Endopolygalacturonase                                                                                                                                           |
| Bste1969 CDS CDS     | 20.0 | 3.0  | 22.0 | M | COG0682         | Prolipoprotein diacylglycerol transferase                                                                                                                       |
| TS28Bac6573 CDS CDS  | 9.5  | 1.5  | 20.9 | M | COG4775         | Outer membrane protein/protective antigen OMA87                                                                                                                 |
| TS29Bac01090 CDS CDS | 3.2  | 0.5  | 20.9 | M | COG1388 COG0741 | FOG: LysM repeat Soluble lytic murein transglycosylase and related regulatory proteins (some contain LysM/invasin domains)                                      |
| Bxyl3330 CDS CDS     | 3.2  | 0.5  | 20.9 | M | COG0741 COG1388 | Soluble lytic murein transglycosylase and related regulatory proteins (some contain LysM/invasin domains) FOG: LysM repeat                                      |
| TS29Fae06882 CDS CDS | 6.2  | 1.0  | 20.4 | M | COG0677 COG0381 | UDP-N-acetyl-D-mannosaminuronate dehydrogenase UDP-N-acetylglucosamine 2-epimerase                                                                              |
| TS29Bac04166 CDS CDS | 2.0  | 0.3  | 19.8 | M | COG1004         | Predicted UDP-glucose 6-dehydrogenase                                                                                                                           |
| Robe0430 CDS CDS     | 3.0  | 0.5  | 19.8 | M | COG1686         | D-alanyl-D-alanine carboxypeptidase                                                                                                                             |
| Bste1372 CDS CDS     | 6.0  | 1.0  | 19.8 | M | COG1368         | Phosphoglycerol transferase and related proteins, alkaline phosphatase superfamily                                                                              |
| TS29Bac08440 CDS CDS | 6.0  | 1.0  | 19.8 | M | COG1089         | GDP-D-mannose dehydratase                                                                                                                                       |
| Dfor1067 CDS CDS     | 6.0  | 1.0  | 19.8 | M | COG0812         | UDP-N-acetylmuramate dehydrogenase                                                                                                                              |
| TS28Met0797 CDS CDS  | 3.0  | 0.5  | 19.8 | M | COG0463 COG2246 | Glycosyltransferases involved in cell wall biogenesis Predicted membrane protein                                                                                |
| Bste3034 CDS CDS     | 35.0 | 6.0  | 19.3 | M | COG1044         | UDP-3-O-(3-hydroxymyristoyl) glucosamine N-acyltransferase                                                                                                      |
| Pmer0881 CDS CDS     | 34.0 | 6.0  | 18.7 | M | COG3206         | Uncharacterized protein involved in exopolysaccharide biosynthesis                                                                                              |
| TS28Rum03384 CDS CDS | 22.0 | 4.0  | 18.2 | M | COG2088         | Uncharacterized protein, involved in the regulation of septum location                                                                                          |
| Bste1331 CDS CDS     | 5.5  | 1.0  | 18.2 | M | COG0845         | Membrane-fusion protein                                                                                                                                         |
| Bova1358 CDS CDS     | 5.5  | 1.0  | 18.2 | M | COG0771         | UDP-N-acetylmuramoylalanine-D-glutamate ligase                                                                                                                  |
| Even0846 CDS CDS     | 11.0 | 2.0  | 18.2 | M | COG0769         | UDP-N-acetylmuramyl tripeptide synthase                                                                                                                         |
| BactD20877 CDS CDS   | 5.4  | 1.0  | 17.9 | M | COG1088         | dTDP-D-glucose 4,6-dehydratase                                                                                                                                  |
| TS28Bac6398 CDS CDS  | 80.7 | 15.0 | 17.8 | M | COG2885         | Outer membrane protein and related peptidoglycan-associated (lipo)proteins                                                                                      |
| BactD12310 CDS CDS   | 13.0 | 2.5  | 17.2 | M | COG2885         | Outer membrane protein and related peptidoglycan-associated (lipo)proteins                                                                                      |
| Hfil1145 CDS CDS     | 5.0  | 1.0  | 16.5 | M | COG1686         | D-alanyl-D-alanine carboxypeptidase                                                                                                                             |
| CspM6213055 CDS CDS  | 5.0  | 1.0  | 16.5 | M | COG0771         | UDP-N-acetylmuramoylalanine-D-glutamate ligase                                                                                                                  |
| Bova3023 CDS CDS     | 5.0  | 1.0  | 16.5 | M | COG0438 COG1922 | Glycosyltransferase Teichoic acid biosynthesis proteins                                                                                                         |
| BactD12214 CDS CDS   | 3.2  | 0.7  | 15.7 | M | COG0463         | Glycosyltransferases involved in cell wall biogenesis                                                                                                           |
| Pmer0412 CDS CDS     | 47.0 | 10.0 | 15.5 | M | COG2885         | Outer membrane protein and related peptidoglycan-associated (lipo)proteins                                                                                      |
| Msmi741183 CDS CDS   | 12.5 | 2.7  | 15.5 | M | COG0449         | Glucosamine 6-phosphate synthetase, contains amidotransferase and phosphosugar isomerase domains                                                                |
| TS29Bac01956 CDS CDS | 4.7  | 1.0  | 15.4 | M | COG0845         | Membrane-fusion protein                                                                                                                                         |
| TS29Bac11615 CDS CDS | 14.0 | 3.0  | 15.4 | M | COG0438         | Glycosyltransferase                                                                                                                                             |
| TS28Fae16710 CDS CDS | 16.0 | 3.5  | 15.1 | M | COG1898         | dTDP-4-dehydrohamnose 3,5-epimerase and related enzymes                                                                                                         |
| BactD14207 CDS CDS   | 1.5  | 0.3  | 14.9 | M | COG2173         | D-alanyl-D-alanine dipeptidase                                                                                                                                  |
| Dfor2990 CDS CDS     | 9.0  | 2.0  | 14.9 | M | COG0791 COG3883 | Cell wall-associated hydrolases (invasion-associated proteins) Uncharacterized protein conserved in bacteria                                                    |
| TS28Fae06121 CDS CDS | 9.0  | 2.0  | 14.9 | M | COG0750         | Predicted membrane-associated Zn-dependent proteases 1                                                                                                          |
| TS29Fae08321 CDS CDS | 4.5  | 1.0  | 14.9 | M | COG0463 COG1887 | Glycosyltransferases involved in cell wall biogenesis Putative glycosylglycerophosphate transferases involved in teichoic acid biosynthesis TagF/TagB/EpsJ/RodC |
| TS29Fae03036 CDS CDS | 4.5  | 1.0  | 14.9 | M | COG0463         | Glycosyltransferases involved in cell wall biogenesis                                                                                                           |
| Bxy11472 CDS CDS     | 4.3  | 1.0  | 14.3 | M | COG2885         | Outer membrane protein and related peptidoglycan-associated (lipo)proteins                                                                                      |
| Rtor2548 CDS CDS     | 8.5  | 2.0  | 14.1 | M | COG0275         | Predicted S-adenosylmethionine-dependent methyltransferase involved in cell envelope biogenesis                                                                 |
| Bxy12439 CDS CDS     | 4.2  | 1.0  | 13.8 | M | COG0859         | ADP-heptose:LPS heptosyltransferase                                                                                                                             |
| TS28Bac5602 CDS CDS  | 2.0  | 0.5  | 13.2 | M | COG0463 COG2246 | Glycosyltransferases involved in cell wall biogenesis Predicted membrane protein                                                                                |
| TS29Bac05719 CDS CDS | 4.0  | 1.0  | 13.2 | M | COG4775 COG1752 | Outer membrane protein/protective antigen OMA87 Predicted esterase of the alpha-beta hydrolase superfamily                                                      |
| Rbro1588 CDS CDS     | 2.0  | 0.5  | 13.2 | M | COG1686         | D-alanyl-D-alanine carboxypeptidase                                                                                                                             |
| Bste3161 CDS CDS     | 2.0  | 0.5  | 13.2 | M | COG1519 COG0220 | 3-deoxy-D-manno-octulosonic-acid transferase Predicted S-adenosylmethionine-dependent methyltransferase                                                         |

|                       |      |       |      |   |                                         |                                                                                                                                                                                                                                      |
|-----------------------|------|-------|------|---|-----------------------------------------|--------------------------------------------------------------------------------------------------------------------------------------------------------------------------------------------------------------------------------------|
| Bova3828 CDS CDS      | 1.0  | 0.3   | 13.2 | M | COG1044                                 | UDP-3-O-[3-hydroxymyristoyl] glucosamine N-acyltransferase                                                                                                                                                                           |
| Even1780 CDS CDS      | 4.0  | 1.0   | 13.2 | M | COG0860                                 | N-acetylmutamoyl-L-alanine amidase                                                                                                                                                                                                   |
| Bcap0372 CDS CDS      | 8.0  | 2.0   | 13.2 | M | COG0791 COG3883 COG0739 COG2951 COG5412 | Cell wall-associated hydrolases (invasion-associated proteins) Uncharacterized protein conserved in bacteria Membrane proteins related to metalloendopeptidases Membrane-bound lytic murein transglycosylase B Phage-related protein |
| TS29Fae00292 CDS CDS  | 2.0  | 0.5   | 13.2 | M | COG0766                                 | UDP-N-acetylglucosamine enolpyruvyl transferase                                                                                                                                                                                      |
| Msmi740437 CDS CDS    | 1.0  | 0.3   | 13.2 | M | COG0750                                 | Predicted membrane-associated Zn-dependent proteases 1                                                                                                                                                                               |
| Pmer2341 CDS CDS      | 8.0  | 2.0   | 13.2 | M | COG0677                                 | UDP-N-acetyl-D-mannosaminuronate dehydrogenase                                                                                                                                                                                       |
| Chir1900 CDS CDS      | 4.0  | 1.0   | 13.2 | M | COG0481                                 | Membrane GTPase LepA                                                                                                                                                                                                                 |
| Csvm0305 CDS CDS      | 4.0  | 1.0   | 13.2 | M | COG0481                                 | Membrane GTPase LepA                                                                                                                                                                                                                 |
| TS29Rum06209 CDS CDS  | 1.3  | 0.3   | 13.2 | M | COG0275                                 | Predicted S-adenosylmethionine-dependent methyltransferase involved in cell envelope biogenesis                                                                                                                                      |
| Msmi740919 CDS CDS    | 3.9  | 1.0   | 12.8 | M | COG0449 COG2222                         | Glucosamine 6-phosphate synthetase, contains amidotransferase and phosphosugar isomerase domains Predicted phosphosugar isomerases                                                                                                   |
| Bdor3264 CDS CDS      | 38.3 | 10.0  | 12.7 | M | COG0845                                 | Membrane-fusion protein                                                                                                                                                                                                              |
| Msmi751223 CDS CDS    | 3.8  | 1.0   | 12.7 | M | COG0463 COG1216                         | Glycosyltransferases involved in cell wall biogenesis Predicted glycosyltransferases                                                                                                                                                 |
| Msmi750494 CDS CDS    | 12.5 | 3.3   | 12.4 | M | COG0449                                 | Glucosamine 6-phosphate synthetase, contains amidotransferase and phosphosugar isomerase domains                                                                                                                                     |
| TS29Bac11368 CDS CDS  | 11.0 | 3.0   | 12.1 | M | COG3049                                 | Penicillin V acylase and related amidases                                                                                                                                                                                            |
| Dfor0849 CDS CDS      | 11.0 | 3.0   | 12.1 | M | COG0275                                 | Predicted S-adenosylmethionine-dependent methyltransferase involved in cell envelope biogenesis                                                                                                                                      |
| b2477 CDS lipoprotein | 3.5  | 1.0   | 11.6 | M | COG3317                                 | Uncharacterized lipoprotein                                                                                                                                                                                                          |
| Ceut0547 CDS CDS      | 7.0  | 2.0   | 11.6 | M | COG1898 COG1091                         | dTDP-4-dehydrohamnose 3,5-epimerase and related enzymes dTDP-4-dehydrohamnose reductase                                                                                                                                              |
| Bova3477 CDS CDS      | 1.8  | 0.5   | 11.6 | M | COG1368                                 | Phosphoglycerol transferase and related proteins, alkaline phosphatase superfamily                                                                                                                                                   |
| TS28Fae06929 CDS CDS  | 14.0 | 4.0   | 11.6 | M | COG1087                                 | UDP-glucose 4-epimerase                                                                                                                                                                                                              |
| ShigsPD90082 CDS CDS  | 3.5  | 1.0   | 11.6 | M | COG1044                                 | UDP-3-O-[3-hydroxymyristoyl] glucosamine N-acyltransferase                                                                                                                                                                           |
| TS29Ali042 CDS CDS    | 3.5  | 1.0   | 11.6 | M | COG1044                                 | UDP-3-O-[3-hydroxymyristoyl] glucosamine N-acyltransferase                                                                                                                                                                           |
| TS29Fae07471 CDS CDS  | 7.0  | 2.0   | 11.6 | M | COG0741 COG3757                         | Soluble lytic murein transglycosylase and related regulatory proteins (some contain LysM/invasin domains) Lysozyme M1 (1,4-beta-N-acetylmuramidase)                                                                                  |
| TS29Fae00294 CDS CDS  | 3.5  | 1.0   | 11.6 | M | COG0739 COG3883 COG0791                 | Membrane proteins related to metalloendopeptidases Uncharacterized protein conserved in bacteria Cell wall-associated hydrolases (invasion-associated proteins)                                                                      |
| Csym1006 CDS CDS      | 7.0  | 2.0   | 11.6 | M | COG0399                                 | Predicted pyridoxal phosphate-dependent enzyme apparently involved in regulation of cell wall biogenesis                                                                                                                             |
| TS29Rum08114 CDS CDS  | 3.5  | 1.0   | 11.6 | M | COG0275                                 | Predicted S-adenosylmethionine-dependent methyltransferase involved in cell envelope biogenesis                                                                                                                                      |
| TS28Fae12901 CDS CDS  | 7.0  | 2.0   | 11.6 | M | COG0275                                 | Predicted S-adenosylmethionine-dependent methyltransferase involved in cell envelope biogenesis                                                                                                                                      |
| Msmi750455 CDS CDS    | 14.3 | 4.2   | 11.4 | M | COG1210                                 | UDP-glucose pyrophosphorylase                                                                                                                                                                                                        |
| TS28Ali0613 CDS CDS   | 89.0 | 26.0  | 11.3 | M | COG1663                                 | Tetraacyldisaccharide-1-P 4'-kinase                                                                                                                                                                                                  |
| Bdor1170 CDS CDS      | 25.5 | 7.5   | 11.2 | M | COG0791 COG0739 COG5412                 | Cell wall-associated hydrolases (invasion-associated proteins) Membrane proteins related to metalloendopeptidases Phage-related protein                                                                                              |
| TS28Fae06281 CDS CDS  | 10.0 | 3.0   | 11.0 | M | COG4750                                 | CTP-phosphocholine cytidylyltransferase involved in choline phosphorylation for cell surface LPS epitopes                                                                                                                            |
| Bdor1096 CDS CDS      | 10.0 | 3.0   | 11.0 | M | COG1181                                 | D-alanine-D-alanine ligase and related ATP-grasp enzymes                                                                                                                                                                             |
| Pmer2778 CDS CDS      | 22.5 | 7.0   | 10.6 | M | COG0275                                 | Predicted S-adenosylmethionine-dependent methyltransferase involved in cell envelope biogenesis                                                                                                                                      |
| TS28Fae05625 CDS CDS  | 16.0 | 5.0   | 10.6 | M | COG1876                                 | D-alanyl-D-alanine carboxypeptidase                                                                                                                                                                                                  |
| Pmer3242 CDS CDS      | 16.0 | 5.0   | 10.6 | M | COG1596                                 | Periplasmic protein involved in polysaccharide export                                                                                                                                                                                |
| BactD21848 CDS CDS    | 1.6  | 0.5   | 10.6 | M | COG0768                                 | Cell division protein FtsI/penicillin-binding protein 2                                                                                                                                                                              |
| Pmer2340 CDS CDS      | 12.5 | 4.0   | 10.3 | M | COG3774                                 | Mannosyltransferase OCH1 and related enzymes                                                                                                                                                                                         |
| TS28Fae19977 CDS CDS  | 2.0  | 67.0  | 0.1  | M | COG0766                                 | UDP-N-acetylglucosamine enolpyruvyl transferase                                                                                                                                                                                      |
| TS28Clo01153 CDS CDS  | 4.0  | 135.0 | 0.1  | M | COG0438 COG1887                         | Glycosyltransferase Putative glycosylglycerophosphate transferases involved in teichoic acid biosynthesis TagF/TagB/Eps/RodC                                                                                                         |
| Cbol3084 CDS CDS      | 0.9  | 31.5  | 0.1  | M | COG0741 COG3757 COG0791                 | Soluble lytic murein transglycosylase and related regulatory proteins (some contain LysM/invasin domains) Lysozyme M1 (1,4-beta-N-acetylmuramidase) Cell wall-associated hydrolases (invasion-associated proteins)                   |
| Robe0376 CDS CDS      | 0.5  | 17.0  | 0.1  | M | COG0773                                 | UDP-N-acetylmuramate-alanine ligase                                                                                                                                                                                                  |
| TS28Eub7015 CDS CDS   | 5.5  | 188.5 | 0.1  | M | COG5009 COG0744                         | Membrane carboxypeptidase/penicillin-binding protein Membrane carboxypeptidase (penicillin-binding protein)                                                                                                                          |
| TS28Fae12961 CDS CDS  | 1.0  | 35.0  | 0.1  | M | COG0562                                 | UDP-galactopyranose mutase                                                                                                                                                                                                           |
| TS28Met1402 CDS CDS   | 0.5  | 17.7  | 0.1  | M | COG0769                                 | UDP-N-acetylmuramyl tripeptide synthase                                                                                                                                                                                              |
| TS28Fae12487 CDS CDS  | 2.0  | 72.5  | 0.1  | M | COG4948                                 | L-alanine-DL-glutamate epimerase and related enzymes of enolase superfamily                                                                                                                                                          |
| TS28Met1075 CDS CDS   | 0.3  | 9.2   | 0.1  | M | COG0562                                 | UDP-galactopyranose mutase                                                                                                                                                                                                           |
| TS28Eub7639 CDS CDS   | 1.0  | 37.0  | 0.1  | M | COG3940 COG5520                         | Predicted beta-xylosidase/O-Glycosyl hydrolase                                                                                                                                                                                       |
| Robe1058 CDS CDS      | 0.3  | 12.3  | 0.1  | M | COG5498                                 | Predicted glycosyl hydrolase                                                                                                                                                                                                         |
| Ehal1311 CDS CDS      | 2.0  | 75.0  | 0.1  | M | COG3049                                 | Penicillin V acylase and related amidases                                                                                                                                                                                            |
| TS28Clo01670 CDS CDS  | 4.0  | 151.0 | 0.1  | M | COG0472                                 | UDP-N-acetylmuramyl pentapeptide phosphotransferase/UDP-N-acetylglucosamine-1-phosphate transferase                                                                                                                                  |
| TS28Bac2721 CDS CDS   | 0.5  | 19.0  | 0.1  | M | COG1089                                 | GDP-D-mannose dehydratase                                                                                                                                                                                                            |
| TS28Bac0435 CDS CDS   | 1.0  | 38.0  | 0.1  | M | COG0438                                 | Glycosyltransferase                                                                                                                                                                                                                  |
| TS28Rum14609 CDS CDS  | 1.2  | 45.0  | 0.1  | M | COG0766                                 | UDP-N-acetylglucosamine enolpyruvyl transferase                                                                                                                                                                                      |
| TS28Fae21505 CDS CDS  | 2.3  | 91.0  | 0.1  | M | COG1087                                 | UDP-glucose 4-epimerase                                                                                                                                                                                                              |
| TS28Fae02412 CDS CDS  | 0.5  | 19.5  | 0.1  | M | COG1209                                 | dTDP-glucose pyrophosphorylase                                                                                                                                                                                                       |
| Cbol3950 CDS CDS      | 0.7  | 26.5  | 0.1  | M | COG0741 COG0791                         | Soluble lytic murein transglycosylase and related regulatory proteins (some contain LysM/invasin domains) Cell wall-associated hydrolases (invasion-associated proteins)                                                             |
| TS28Rum00130 CDS CDS  | 1.0  | 40.0  | 0.1  | M | COG0771 COG0769                         | UDP-N-acetylmuramoylalanine-D-glutamate ligase UDP-N-acetylmuramyl tripeptide synthase                                                                                                                                               |
| TS28Dor2263 CDS CDS   | 16.0 | 656.0 | 0.1  | M | COG4932                                 | Predicted outer membrane protein                                                                                                                                                                                                     |

|                                                                  |      |       |     |   |                                 |                                                                                                                                                                                             |
|------------------------------------------------------------------|------|-------|-----|---|---------------------------------|---------------------------------------------------------------------------------------------------------------------------------------------------------------------------------------------|
| TS28Rum00317 CDS CDS                                             | 0.3  | 13.8  | 0.1 | M | COG0472                         | UDP-N-acetylmuramyl pentapeptide phosphotransferase/UDP-N-acetylglucosamine-1-phosphate transferase                                                                                         |
| TS28Fae20211 CDS CDS                                             | 2.0  | 84.5  | 0.1 | M | COG1368                         | Phosphoglycerol transferase and related proteins, alkaline phosphatase superfamily                                                                                                          |
| TS28Eub7159 CDS CDS                                              | 3.0  | 129.0 | 0.1 | M | COG0768                         | Cell division protein FtsI/penicillin-binding protein 2                                                                                                                                     |
| TS28Fae18484 CDS CDS                                             | 0.5  | 21.5  | 0.1 | M | COG0707                         | UDP-N-acetylglucosamine:LPS N-acetylglucosamine transferase                                                                                                                                 |
| TS29Rum18703 CDS CDS                                             | 2.0  | 87.0  | 0.1 | M | COG4932                         | Predicted outer membrane protein                                                                                                                                                            |
| TS28Fae22393 CDS CDS                                             | 0.5  | 22.0  | 0.1 | M | COG0438                         | Glycosyltransferase                                                                                                                                                                         |
| TS29RumUnc0410 CDS CDS                                           | 0.5  | 22.0  | 0.1 | M | COG0438                         | Glycosyltransferase                                                                                                                                                                         |
| TS28Clo00523 CDS CDS                                             | 8.0  | 363.0 | 0.1 | M | COG4932 COG4886 COG1357         | Predicted outer membrane protein Leucine-rich repeat (LRR) protein Uncharacterized low-complexity proteins                                                                                  |
| TS29Rum11714 CDS CDS                                             | 1.5  | 69.0  | 0.1 | M | COG0741 COG3757                 | Soluble lytic murein transglycosylase and related regulatory proteins (some contain LysM/invasin domains) Lysozyme M1 (1,4-beta-N-acetylglucosaminidase)                                    |
| Even0431 CDS CDS                                                 | 4.0  | 185.3 | 0.1 | M | COG4932 COG4509                 | Predicted outer membrane protein Uncharacterized protein conserved in bacteria                                                                                                              |
| TS29Rum13768 CDS CDS                                             | 1.0  | 47.0  | 0.1 | M | COG1368                         | Phosphoglycerol transferase and related proteins, alkaline phosphatase superfamily                                                                                                          |
| TS28Fae06646 CDS CDS                                             | 0.3  | 16.0  | 0.1 | M | COG0481                         | Membrane GTPase LepA                                                                                                                                                                        |
| TS28Clo01156 CDS CDS                                             | 2.0  | 96.0  | 0.1 | M | COG1876                         | D-alanyl-D-alanine carboxypeptidase                                                                                                                                                         |
| TS28Eub4469 CDS CDS                                              | 1.3  | 68.0  | 0.1 | M | COG0739 COG3883 COG5283 COG0791 | Membrane proteins related to metalloendopeptidases Uncharacterized protein conserved in bacterial Phage-related tail protein Cell wall-associated hydrolases (invasion-associated proteins) |
| TS28Eub7161 CDS CDS                                              | 1.0  | 52.0  | 0.1 | M | COG0275                         | Predicted S-adenosylmethionine-dependent methyltransferase involved in cell envelope biogenesis                                                                                             |
| Ehif0599 CDS CDS                                                 | 2.0  | 105.7 | 0.1 | M | COG4932                         | Predicted outer membrane protein                                                                                                                                                            |
| TS28Eub3993 CDS CDS                                              | 1.0  | 53.0  | 0.1 | M | COG0438 COG1543                 | Glycosyltransferase Uncharacterized conserved protein                                                                                                                                       |
| TS28Rum11599 CDS CDS                                             | 0.7  | 35.7  | 0.1 | M | COG4932                         | Predicted outer membrane protein                                                                                                                                                            |
| Cnex0942 CDS CDS                                                 | 0.7  | 36.8  | 0.1 | M | COG4932                         | Predicted outer membrane protein                                                                                                                                                            |
| TS28Clo01565 CDS CDS                                             | 2.0  | 111.0 | 0.1 | M | COG3049                         | Penicillin V acylase and related amidases                                                                                                                                                   |
| TS28Bac7137 CDS CDS                                              | 0.5  | 28.0  | 0.1 | M | COG0438 COG0859                 | Glycosyltransferase ADP-heptose:LPS heptosyltransferase                                                                                                                                     |
| TS28Clo00945 CDS CDS                                             | 2.0  | 112.0 | 0.1 | M | COG0438                         | Glycosyltransferase                                                                                                                                                                         |
| TS29Dor2226 CDS CDS                                              | 10.0 | 564.1 | 0.1 | M | COG4886 COG3209 COG5276         | Leucine-rich repeat (LRR) protein Rhs family protein Uncharacterized conserved protein                                                                                                      |
| Ehal2405 CDS CDS                                                 | 0.3  | 14.5  | 0.1 | M | COG1368                         | Phosphoglycerol transferase and related proteins, alkaline phosphatase superfamily                                                                                                          |
| TS28Fae18452 CDS CDS                                             | 0.3  | 19.5  | 0.1 | M | COG1898                         | dTDP-4-dehydrothiamine 3,5-epimerase and related enzymes                                                                                                                                    |
| TS28Dor2628 CDS CDS                                              | 10.0 | 593.1 | 0.1 | M | COG4886 COG3209 COG5276         | Leucine-rich repeat (LRR) protein Rhs family protein Uncharacterized conserved protein                                                                                                      |
| TS29Eub1923 CDS CDS                                              | 0.5  | 31.0  | 0.1 | M | COG4932                         | Predicted outer membrane protein                                                                                                                                                            |
| TS29RumUnc1441 CDS CDS                                           | 2.0  | 124.0 | 0.1 | M | COG4932                         | Predicted outer membrane protein                                                                                                                                                            |
| CspM6210958 CDS CDS                                              | 2.5  | 157.5 | 0.1 | M | COG4932                         | Predicted outer membrane protein                                                                                                                                                            |
| TS28Eub7158 CDS CDS                                              | 1.5  | 94.5  | 0.1 | M | COG0768                         | Cell division protein FtsI/penicillin-binding protein 2                                                                                                                                     |
| EUBREC1319 CDS phospho-N-acetylmuramoyl-pentapeptide-transferase | 1.0  | 64.0  | 0.1 | M | COG0472                         | UDP-N-acetylmuramyl pentapeptide phosphotransferase/UDP-N-acetylglucosamine-1-phosphate transferase                                                                                         |
| Robe2641 CDS CDS                                                 | 0.7  | 44.5  | 0.0 | M | COG4932                         | Predicted outer membrane protein                                                                                                                                                            |
| TS28Clo00532 CDS CDS                                             | 4.0  | 274.0 | 0.0 | M | COG0768                         | Cell division protein FtsI/penicillin-binding protein 2                                                                                                                                     |
| TS28Fae19368 CDS CDS                                             | 0.3  | 22.8  | 0.0 | M | COG0766                         | UDP-N-acetylglucosamine enolpyruvyl transferase                                                                                                                                             |
| CspSS23032 CDS CDS                                               | 1.0  | 69.2  | 0.0 | M | COG4932                         | Predicted outer membrane protein                                                                                                                                                            |
| TS28Eub6911 CDS CDS                                              | 0.5  | 35.5  | 0.0 | M | COG0741                         | Soluble lytic murein transglycosylase and related regulatory proteins (some contain LysM/invasin domains)                                                                                   |
| TS28Eub6232 CDS CDS                                              | 0.5  | 36.0  | 0.0 | M | COG1087                         | UDP-glucose 4-epimerase                                                                                                                                                                     |
| TS28Clo00579 CDS CDS                                             | 4.0  | 290.0 | 0.0 | M | COG0768                         | Cell division protein FtsI/penicillin-binding protein 2                                                                                                                                     |
| TS29Bif3129 CDS CDS                                              | 1.0  | 73.0  | 0.0 | M | COG4932                         | Predicted outer membrane protein                                                                                                                                                            |
| TS28Fae18231 CDS CDS                                             | 1.0  | 75.0  | 0.0 | M | COG1696                         | Predicted membrane protein involved in D-alanine export                                                                                                                                     |
| TS28Fae07317 CDS CDS                                             | 0.5  | 37.0  | 0.0 | M | COG0481                         | Membrane GTPase LepA                                                                                                                                                                        |
| TS28Fae01838 CDS CDS                                             | 0.5  | 39.0  | 0.0 | M | COG2148 COG0707                 | Sugar transferases involved in lipopolysaccharide synthesis UDP-N-acetylglucosamine:LPS N-acetylglucosamine transferase                                                                     |
| TS28Clo01323 CDS CDS                                             | 1.0  | 78.5  | 0.0 | M | COG0357                         | Predicted S-adenosylmethionine-dependent methyltransferase involved in bacterial cell division                                                                                              |
| TS28Fae03718 CDS CDS                                             | 0.1  | 12.0  | 0.0 | M | COG0481                         | Membrane GTPase LepA                                                                                                                                                                        |
| TS28Bac3778 CDS CDS                                              | 0.5  | 43.0  | 0.0 | M | COG5434                         | Endopolygalacturonase                                                                                                                                                                       |
| CspSS20003 CDS CDS                                               | 1.0  | 89.1  | 0.0 | M | COG4932                         | Predicted outer membrane protein                                                                                                                                                            |
| TS28Eub6387 CDS CDS                                              | 0.5  | 45.0  | 0.0 | M | COG1792                         | Cell shape-determining protein                                                                                                                                                              |
| TS28Eub0524 CDS CDS                                              | 1.0  | 91.5  | 0.0 | M | COG0766                         | UDP-N-acetylglucosamine enolpyruvyl transferase                                                                                                                                             |
| TS28Eub5438 CDS CDS                                              | 1.0  | 93.2  | 0.0 | M | COG1887                         | Putative glycosylglycerophosphate transferases involved in teichoic acid biosynthesis TarF TagB EpsJ RodC                                                                                   |
| TS28Eub5610 CDS CDS                                              | 1.0  | 96.0  | 0.0 | M | COG0438 COG2148 COG0707         | Glycosyltransferase Sugar transferases involved in lipopolysaccharide synthesis UDP-N-acetylglucosamine:LPS N-acetylglucosamine transferase                                                 |
| Ccom1803 CDS CDS                                                 | 0.7  | 67.3  | 0.0 | M | COG4932                         | Predicted outer membrane protein                                                                                                                                                            |
| TS28Clo01587 CDS CDS                                             | 3.0  | 317.0 | 0.0 | M | COG4932 COG4886 COG3291 COG1357 | Predicted outer membrane protein Leucine-rich repeat (LRR) protein FOG: PKD repeat Uncharacterized low-complexity proteins                                                                  |
| TS28Clo00819 CDS CDS                                             | 1.0  | 107.0 | 0.0 | M | COG0796                         | Glutamate racemase                                                                                                                                                                          |
| Robe0860 CDS CDS                                                 | 2.0  | 218.7 | 0.0 | M | COG4932                         | Predicted outer membrane protein                                                                                                                                                            |
| TS28Eub4771 CDS CDS                                              | 0.3  | 38.0  | 0.0 | M | COG0771                         | UDP-N-acetylmuramoylalanine-D-glutamate ligase                                                                                                                                              |
| TS28Eub7945 CDS CDS                                              | 0.7  | 77.3  | 0.0 | M | COG0845                         | Membrane-fusion protein                                                                                                                                                                     |
| TS28Rum13650 CDS CDS                                             | 0.5  | 59.5  | 0.0 | M | COG1696                         | Predicted membrane protein involved in D-alanine export                                                                                                                                     |
| TS29Rum11739 CDS CDS                                             | 2.0  | 261.8 | 0.0 | M | COG4932                         | Predicted outer membrane protein                                                                                                                                                            |
| TS28Clo01531 CDS CDS                                             | 3.0  | 400.5 | 0.0 | M | COG5009 COG0744                 | Membrane carboxypeptidase penicillin-binding protein Membrane carboxypeptidase (penicillin-binding protein)                                                                                 |
| TS28Fae13752 CDS CDS                                             | 1.0  | 151.0 | 0.0 | M | COG4932                         | Predicted outer membrane protein                                                                                                                                                            |
| TS28Clo01350 CDS CDS                                             | 1.0  | 159.0 | 0.0 | M | COG0766                         | UDP-N-acetylglucosamine enolpyruvyl transferase                                                                                                                                             |
| TS28Eub6386 CDS CDS                                              | 1.0  | 162.0 | 0.0 | M | COG0768                         | Cell division protein FtsI/penicillin-binding protein 2                                                                                                                                     |
| TS28Eub8415 CDS CDS                                              | 0.5  | 89.0  | 0.0 | M | COG0449                         | Glucosamine 6-phosphate synthetase, contains amidotransferase and phosphosugar isomerase domains                                                                                            |
| Ehal0341 CDS CDS                                                 | 0.2  | 37.6  | 0.0 | M | COG4932                         | Predicted outer membrane protein                                                                                                                                                            |
| TS28Rum16195 CDS CDS                                             | 0.5  | 109.0 | 0.0 | M | COG5434                         | Endopolygalacturonase                                                                                                                                                                       |

|                         |       |       |      |         |                                         |                                                                                                                                                                                                                                                                                                                                      |
|-------------------------|-------|-------|------|---------|-----------------------------------------|--------------------------------------------------------------------------------------------------------------------------------------------------------------------------------------------------------------------------------------------------------------------------------------------------------------------------------------|
| Robe3825 CDS CDS        | 0.7   | 149.0 | 0.0  | M       | COG4932                                 | Predicted outer membrane protein                                                                                                                                                                                                                                                                                                     |
| CspSS21752 CDS CDS      | 0.7   | 158.1 | 0.0  | M       | COG4932                                 | Predicted outer membrane protein                                                                                                                                                                                                                                                                                                     |
| TS28Eub7419 CDS CDS     | 0.2   | 109.0 | 0.0  | M       | COG4932                                 | Predicted outer membrane protein                                                                                                                                                                                                                                                                                                     |
| Ccom0358 CDS CDS        | 0.2   | 134.3 | 0.0  | M       | COG4932                                 | Predicted outer membrane protein                                                                                                                                                                                                                                                                                                     |
| TS28Eub7705 CDS CDS     | 0.2   | 218.5 | 0.0  | M       | COG4932                                 | Predicted outer membrane protein                                                                                                                                                                                                                                                                                                     |
| TS28RumUnc0947 CDS CDS  | 40.0  | 5.0   | 26.5 | M D     | COG0489 COG3944                         | ATPases involved in chromosome partitioning Capsular polysaccharide biosynthesis protein                                                                                                                                                                                                                                             |
| TS28Fae06722 CDS CDS    | 10.0  | 3.0   | 11.0 | M D     | COG0489 COG3944                         | ATPases involved in chromosome partitioning Capsular polysaccharide biosynthesis protein                                                                                                                                                                                                                                             |
| BactD13176 CDS CDS      | 10.0  | 3.0   | 11.0 | M D     | COG0489 COG3206 COG3944 COG2148         | ATPases involved in chromosome partitioning Uncharacterized protein involved in exopolysaccharide biosynthesis Capsular polysaccharide biosynthesis protein Sugar transferases involved in lipopolysaccharide synthesis                                                                                                              |
| TS28Clo00838 CDS CDS    | 1.0   | 84.0  | 0.0  | M D     | COG0489 COG3944                         | ATPases involved in chromosome partitioning Capsular polysaccharide biosynthesis protein                                                                                                                                                                                                                                             |
| Bdor2088 CDS CDS        | 179.5 | 15.0  | 39.6 | M G     | COG2942 COG0836                         | N-acyl-D-glucosamine 2-epimerase Mannose-1-phosphate guanylyltransferase                                                                                                                                                                                                                                                             |
| Msmi751206 CDS CDS      | 4.5   | 0.5   | 29.8 | M G     | COG0463 COG3594 COG1887 COG1442 COG4641 | Glycosyltransferases involved in cell wall biogenesis Fucose 4-O-acetylase and related acetyltransferases Putative glycosyl/glycerophosphate transferases involved in teichoic acid biosynthesis TagF/TagB/Eps/RodC Lipopolysaccharide biosynthesis proteins, LPS:glycosyltransferases Uncharacterized protein conserved in bacteria |
| Msmi750020 CDS CDS      | 2.5   | 0.3   | 24.8 | M G     | COG0451 COG1087                         | Nucleoside-diphosphate-sugar epimerases UDP-glucose 4-epimerase                                                                                                                                                                                                                                                                      |
| PRABACTJOHN2720 CDS CDS | 44.5  | 6.0   | 24.5 | M G     | COG3507 COG5520 COG3940                 | Beta-xylosidase O-Glycosyl hydrolase Predicted beta-xylosidase                                                                                                                                                                                                                                                                       |
| Cspi0135 CDS CDS        | 7.0   | 1.0   | 23.1 | M G     | COG2222 COG4573                         | Predicted phosphosugar isomerases Predicted tagatose 6-phosphate kinase                                                                                                                                                                                                                                                              |
| Pmer3398 CDS CDS        | 55.5  | 9.0   | 20.4 | M G     | COG3507 COG5520 COG3940                 | Beta-xylosidase O-Glycosyl hydrolase Predicted beta-xylosidase                                                                                                                                                                                                                                                                       |
| Bdor0471 CDS CDS        | 16.7  | 3.0   | 18.4 | M G     | COG1210 COG1109                         | UDP-glucose pyrophosphorylase Phosphomannomutase                                                                                                                                                                                                                                                                                     |
| Aco12236 CDS CDS        | 5.0   | 1.0   | 16.5 | M G     | COG1210 COG1109                         | UDP-glucose pyrophosphorylase Phosphomannomutase                                                                                                                                                                                                                                                                                     |
| Msmi751388 CDS CDS      | 1.5   | 0.3   | 14.9 | M G     | COG1210 COG1109                         | UDP-glucose pyrophosphorylase Phosphomannomutase                                                                                                                                                                                                                                                                                     |
| Robe0434 CDS CDS        | 8.5   | 2.0   | 14.1 | M G     | COG1134                                 | ABC-type polysaccharide/polyol phosphate transport system, ATPase component                                                                                                                                                                                                                                                          |
| Msmi740460 CDS CDS      | 7.0   | 1.7   | 13.9 | M G     | COG0463 COG3594 COG1216                 | Glycosyltransferases involved in cell wall biogenesis Fucose 4-O-acetylase and related acetyltransferases Predicted glycosyltransferases                                                                                                                                                                                             |
| BactD13805 CDS CDS      | 2.0   | 0.5   | 13.2 | M G     | COG0463 COG3594 COG1887 COG1442         | Glycosyltransferases involved in cell wall biogenesis Fucose 4-O-acetylase and related acetyltransferases Putative glycosyl/glycerophosphate transferases involved in teichoic acid biosynthesis TagF/TagB/Eps/RodC Lipopolysaccharide biosynthesis proteins, LPS:glycosyltransferases                                               |
| Msmi741141 CDS CDS      | 3.0   | 0.8   | 13.2 | M G     | COG0463 COG3594 COG1887 COG1442 COG4641 | Glycosyltransferases involved in cell wall biogenesis Fucose 4-O-acetylase and related acetyltransferases Putative glycosyl/glycerophosphate transferases involved in teichoic acid biosynthesis TagF/TagB/Eps/RodC Lipopolysaccharide biosynthesis proteins, LPS:glycosyltransferases Uncharacterized protein conserved in bacteria |
| BactD11859 CDS CDS      | 4.0   | 1.0   | 13.2 | M G     | COG0451 COG1088 COG1087                 | Nucleoside-diphosphate-sugar epimerases dTDP-D-glucose 4,6-dehydratase UDP-glucose 4-epimerase                                                                                                                                                                                                                                       |
| Msmi741166 CDS CDS      | 1.3   | 0.3   | 12.4 | M G     | COG1086                                 | Predicted nucleoside-diphosphate sugar epimerases                                                                                                                                                                                                                                                                                    |
| Rtor2578 CDS CDS        | 1.0   | 34.0  | 0.1  | M G     | COG2730 COG3507 COG5520 COG4124         | Endogluconase Beta-xylosidase O-Glycosyl hydrolase Beta-mannanase                                                                                                                                                                                                                                                                    |
| FpraM2122432 CDS CDS    | 8.7   | 0.5   | 57.3 | M I     | COG0463 COG1887 COG1216 COG3754 COG1835 | Glycosyltransferases involved in cell wall biogenesis Putative glycosyl/glycerophosphate transferases involved in teichoic acid biosynthesis TagF/TagB/Eps/RodC Predicted glycosyltransferases Lipopolysaccharide biosynthesis protein Predicted acyltransferases                                                                    |
| Pmer0790 CDS CDS        | 11.0  | 2.0   | 18.2 | M I     | COG2870 COG0615                         | ADP-heptose synthase, bifunctional sugar kinase adenyltransferase Cytidyltransferase                                                                                                                                                                                                                                                 |
| Csym2684 CDS CDS        | 9.0   | 1.0   | 29.8 | M O     | COG0463 COG1887 COG1216 COG3754 COG3914 | Glycosyltransferases involved in cell wall biogenesis Putative glycosyl/glycerophosphate transferases involved in teichoic acid biosynthesis TagF/TagB/Eps/RodC Predicted glycosyltransferases Lipopolysaccharide biosynthesis protein Predicted O-linked N-acetylglucosamine transferase, SPINDLY family                            |
| TS28RumUnc2054 CDS CDS  | 0.7   | 35.0  | 0.1  | M T     | COG3409 COG1388 COG3883 COG3103 COG0791 | Putative peptidoglycan-binding domain-containing protein FOG-LysM repeat Uncharacterized protein conserved in bacterial SH3 domain protein Cell wall-associated hydrolases (invasion-associated proteins)                                                                                                                            |
| TS29Bac12007 CDS CDS    | 7.5   | 1.5   | 16.5 | M U     | COG1538                                 | Outer membrane protein                                                                                                                                                                                                                                                                                                               |
| ShigspD92426 CDS CDS    | 5.0   | 1.0   | 16.5 | M U     | COG1538                                 | Outer membrane protein                                                                                                                                                                                                                                                                                                               |
| Bega2377 CDS CDS        | 4.0   | 1.0   | 13.2 | M U     | COG0597                                 | Lipoprotein signal peptidase                                                                                                                                                                                                                                                                                                         |
| TS28Bac6385 CDS CDS     | 1.0   | 51.0  | 0.1  | M U     | COG1538                                 | Outer membrane protein                                                                                                                                                                                                                                                                                                               |
| ShigspD92848 CDS CDS    | 3.0   | 0.5   | 19.8 | M U W   | COG5295 COG4625 COG3468                 | Autotransporter adhesin Uncharacterized protein with a C-terminal OMP (outer membrane protein) domain Type V secretory pathway, adhesin Aida                                                                                                                                                                                         |
| ShigspD92357 CDS CDS    | 4.5   | 1.0   | 14.9 | M U W   | COG5295 COG3468                         | Autotransporter adhesin Type V secretory pathway, adhesin Aida                                                                                                                                                                                                                                                                       |
| BactD11577 CDS CDS      | 7.5   | 1.5   | 16.5 | M V U   | COG1538 COG0841                         | Outer membrane protein Cation/multidrug efflux pump                                                                                                                                                                                                                                                                                  |
| BactD20059 CDS CDS      | 2.5   | 0.5   | 16.5 | M V U   | COG1538 COG0841                         | Outer membrane protein Cation/multidrug efflux pump                                                                                                                                                                                                                                                                                  |
| CspM6210755 CDS CDS     | 14.0  | 1.0   | 46.3 | N       | COG5651                                 | PPE-repeat proteins                                                                                                                                                                                                                                                                                                                  |
| TS28Rum13179 CDS CDS    | 139.0 | 14.0  | 32.8 | N       | COG1344                                 | Flagellin and related hook-associated proteins                                                                                                                                                                                                                                                                                       |
| Casp6307 CDS CDS        | 14.0  | 2.0   | 23.1 | N       | COG5492                                 | Bacterial surface proteins containing Ig-like domains                                                                                                                                                                                                                                                                                |
| RintL11106 CDS CDS      | 4.0   | 1.0   | 13.2 | N       | COG1344                                 | Flagellin and related hook-associated proteins                                                                                                                                                                                                                                                                                       |
| TS28Fae04478 CDS CDS    | 11.0  | 3.0   | 12.1 | N       | COG1724                                 | Predicted periplasmic or secreted lipoprotein                                                                                                                                                                                                                                                                                        |
| TS28Eub0393 CDS CDS     | 2.0   | 148.5 | 0.0  | N       | COG5492                                 | Bacterial surface proteins containing Ig-like domains                                                                                                                                                                                                                                                                                |
| TS29Met0240 CDS CDS     | 5.6   | 1.8   | 10.3 | N C L U | COG1156 COG1372 COG1157 COG0055         | Archaeal/vacuolar-type H+-ATPase subunit B Intein/homing endonuclease Flagellar biosynthesis/type III secretory pathway ATPase F0F1-type ATP synthase, beta subunit                                                                                                                                                                  |

|                         |       |       |       |         |                                                                                         |                                                                                                                                                                                                                                                                                                                                                                                                                                                                                                                                                                                                                                                             |
|-------------------------|-------|-------|-------|---------|-----------------------------------------------------------------------------------------|-------------------------------------------------------------------------------------------------------------------------------------------------------------------------------------------------------------------------------------------------------------------------------------------------------------------------------------------------------------------------------------------------------------------------------------------------------------------------------------------------------------------------------------------------------------------------------------------------------------------------------------------------------------|
| TS28Dor0729 CDS CDS     | 0.5   | 38.0  | 0.0   | N C L U | COG1372 COG1157 COG1155 COG0055                                                         | Intein/homing endonuclease Flagellar biosynthesis/type III secretory pathway ATPase Archaeal/vacuolar-type H <sup>+</sup> -ATPase subunit A F0F1-type ATP synthase, beta subunit                                                                                                                                                                                                                                                                                                                                                                                                                                                                            |
| Ccom1873 CDS CDS        | 6.0   | 1.0   | 19.8  | N E M O | COG5492 COG5479 COG3291 COG1404 COG3227 COG3979 COG4412                                 | Bacterial surface proteins containing Ig-like domains Uncharacterized protein potentially involved in peptidoglycan biosynthesis FOG: PKD repeat Subtilisin-like serine proteases Zinc metalloprotease (elastase) Uncharacterized protein contain chitin-binding domain type 3 Uncharacterized protein conserved in bacteria                                                                                                                                                                                                                                                                                                                                |
| Cspi1488 CDS CDS        | 48.0  | 3.0   | 52.9  | N G U   | COG5492 COG3291 COG2273 COG3250 COG1501 COG1472 COG4409 COG3525 COG0823 COG4412         | Bacterial surface proteins containing Ig-like domains FOG: PKD repeat Beta-glucanase/Beta-glucan synthetase Beta-galactosidase/beta-glucuronidase Alpha-glucosidases, family 31 of glycosyl hydrolases Beta-glucosidase-related glycosidases Neuraminidase (sialidase) N-acetyl-beta-hexosaminidase Periplasmic component of the Tol biopolymer transport system Uncharacterized protein conserved in bacteria                                                                                                                                                                                                                                              |
| Msmi741408 CDS CDS      | 1.7   | 0.5   | 11.0  | N G U   | COG2730 COG3210 COG5651                                                                 | Endoglucanase Large exoproteins involved in heme utilization or adhesion PPE-repeat proteins                                                                                                                                                                                                                                                                                                                                                                                                                                                                                                                                                                |
| TS29Rum13519 CDS CDS    | 117.0 | 6.0   | 64.5  | N K T   | COG0642 COG0745 COG4753 COG0784 COG3279 COG3706 COG2197 COG2200 COG2201 COG3707         | Signal transduction histidine kinase Response regulators consisting of a CheY-like receiver domain and a winged-helix DNA-binding domain Response regulator containing CheY-like receiver domain and AraC-type DNA-binding domain FOG: CheY-like receiver Response regulator of the LyrR/AlgR family Response regulator containing a CheY-like receiver domain and a GGDEF domain Response regulator containing a CheY-like receiver domain and an HTH DNA-binding domain FOG: EAL domain Chemotaxis response regulator containing a CheY-like receiver domain and a methyltransferase domain Response regulator with putative antiterminator output domain |
| TS28Fae17369 CDS CDS    | 0.5   | 33.0  | 0.1   | N K U T | COG3437 COG2804                                                                         | Response regulator containing a CheY-like receiver domain and an HD-GYP domain Type II secretory pathway, ATPase PulE/Tfp pilus assembly pathway, ATPase PilB                                                                                                                                                                                                                                                                                                                                                                                                                                                                                               |
| Aput2338 CDS CDS        | 10.0  | 1.0   | 33.1  | N L C U | COG1372 COG0055 COG1157 COG1155                                                         | Intein/homing endonuclease F0F1-type ATP synthase, beta subunit Flagellar biosynthesis/type III secretory pathway ATPase Archaeal/vacuolar-type H <sup>+</sup> -ATPase subunit A                                                                                                                                                                                                                                                                                                                                                                                                                                                                            |
| Csci0942 CDS CDS        | 9.0   | 1.0   | 29.8  | N L C U | COG1372 COG1156 COG1157                                                                 | Intein/homing endonuclease Archaeal/vacuolar-type H <sup>+</sup> -ATPase subunit B Flagellar biosynthesis/type III secretory pathway ATPase                                                                                                                                                                                                                                                                                                                                                                                                                                                                                                                 |
| Msmi740101 CDS CDS      | 11.4  | 2.1   | 17.6  | N L C U | COG1372 COG0055 COG1156 COG1157                                                         | Intein/homing endonuclease F0F1-type ATP synthase, beta subunit Archaeal/vacuolar-type H <sup>+</sup> -ATPase subunit B Flagellar biosynthesis/type III secretory pathway ATPase                                                                                                                                                                                                                                                                                                                                                                                                                                                                            |
| Msmi751598 CDS CDS      | 11.4  | 3.1   | 12.0  | N L C U | COG1372 COG0055 COG1156 COG1157                                                         | Intein/homing endonuclease F0F1-type ATP synthase, beta subunit Archaeal/vacuolar-type H <sup>+</sup> -ATPase subunit B Flagellar biosynthesis/type III secretory pathway ATPase                                                                                                                                                                                                                                                                                                                                                                                                                                                                            |
| TS28Dor1097 CDS CDS     | 0.5   | 36.0  | 0.0   | N M     | COG5492 COG3409 COG1376                                                                 | Bacterial surface proteins containing Ig-like domains Putative peptidoglycan-binding domain-containing protein Uncharacterized protein conserved in bacteria                                                                                                                                                                                                                                                                                                                                                                                                                                                                                                |
| Bdor3263 CDS CDS        | 15.0  | 3.0   | 16.5  | N M O U | COG1705 COG5632 COG3942 COG3951                                                         | Muramidase (flagellum-specific) N-acetylmuramoyl-L-alanine amidase Surface antigen Rod binding protein                                                                                                                                                                                                                                                                                                                                                                                                                                                                                                                                                      |
| TS28Bac5806 CDS CDS     | 1.0   | 119.0 | 0.0   | N T     | COG0642 COG5002 COG2202 COG0784 COG4252 COG2198 COG2203 COG3300 COG3292 COG3447 COG1352 | Signal transduction histidine kinase Signal transduction histidine kinase FOG: PAS/PAC domain FOG: CheY-like receiver Predicted transmembrane sensor domain FOG: HPT domain FOG: GAF domain MHYT domain (predicted integral membrane sensor domain) Predicted periplasmic ligand-binding sensor domain Predicted integral membrane sensor domain Methylase of chemotaxis methyl-accepting proteins                                                                                                                                                                                                                                                          |
| ShigsD91374 CDS CDS     | 8.0   | 0.5   | 52.9  | NIU     | COG3188                                                                                 | P pilus assembly protein, porin PapC                                                                                                                                                                                                                                                                                                                                                                                                                                                                                                                                                                                                                        |
| ShigsD90563 CDS CDS     | 7.5   | 1.0   | 24.8  | NIU     | COG3188                                                                                 | P pilus assembly protein, porin PapC                                                                                                                                                                                                                                                                                                                                                                                                                                                                                                                                                                                                                        |
| TS29Dor1540 CDS CDS     | 6.0   | 1.0   | 19.8  | NIU     | COG1886                                                                                 | Flagellar motor switch/type III secretory pathway protein                                                                                                                                                                                                                                                                                                                                                                                                                                                                                                                                                                                                   |
| TS28C00554 CDS CDS      | 4.0   | 203.0 | 0.1   | NIU     | COG1459                                                                                 | Type II secretory pathway, component PulF                                                                                                                                                                                                                                                                                                                                                                                                                                                                                                                                                                                                                   |
| TS28Bif3174 CDS CDS     | 0.3   | 30.7  | 0.0   | N U     | COG2805 COG5008                                                                         | Tfp pilus assembly protein, pilus retraction ATPase PilT Tfp pilus assembly protein, ATPase PilU                                                                                                                                                                                                                                                                                                                                                                                                                                                                                                                                                            |
| Bfm0905 CDS CDS         | 14.3  | 0.3   | 188.5 | O       | COG0071                                                                                 | Molecular chaperone (small heat shock protein)                                                                                                                                                                                                                                                                                                                                                                                                                                                                                                                                                                                                              |
| TS29Fae10145 CDS CDS    | 9.3   | 0.3   | 92.6  | O       | COG0265                                                                                 | Trypsin-like serine proteases, typically periplasmic, contain C-terminal PDZ domain                                                                                                                                                                                                                                                                                                                                                                                                                                                                                                                                                                         |
| PRABACTJOHN3634 CDS CDS | 28.0  | 1.0   | 92.6  | O       | COG3187                                                                                 | Heat shock protein                                                                                                                                                                                                                                                                                                                                                                                                                                                                                                                                                                                                                                          |
| Bthe3732369 CDS CDS     | 14.3  | 0.6   | 80.8  | O       | COG0071                                                                                 | Molecular chaperone (small heat shock protein)                                                                                                                                                                                                                                                                                                                                                                                                                                                                                                                                                                                                              |
| Bthe7331683 CDS CDS     | 14.3  | 0.6   | 80.8  | O       | COG0071                                                                                 | Molecular chaperone (small heat shock protein)                                                                                                                                                                                                                                                                                                                                                                                                                                                                                                                                                                                                              |
| BactD12632 CDS CDS      | 14.3  | 0.6   | 80.8  | O       | COG0071                                                                                 | Molecular chaperone (small heat shock protein)                                                                                                                                                                                                                                                                                                                                                                                                                                                                                                                                                                                                              |
| Pmer1175 CDS CDS        | 65.0  | 3.0   | 71.7  | O       | COG3187                                                                                 | Heat shock protein                                                                                                                                                                                                                                                                                                                                                                                                                                                                                                                                                                                                                                          |
| Pmer2683 CDS CDS        | 19.0  | 1.0   | 62.8  | O       | COG0450                                                                                 | Peroxioredoxin                                                                                                                                                                                                                                                                                                                                                                                                                                                                                                                                                                                                                                              |
| TS29Fae09025 CDS CDS    | 25.6  | 1.5   | 56.4  | O       | COG0071                                                                                 | Molecular chaperone (small heat shock protein)                                                                                                                                                                                                                                                                                                                                                                                                                                                                                                                                                                                                              |
| TS28Rum01962 CDS CDS    | 16.0  | 1.0   | 52.9  | O       | COG0465                                                                                 | ATP-dependent Zn proteases                                                                                                                                                                                                                                                                                                                                                                                                                                                                                                                                                                                                                                  |
| Casp3984 CDS CDS        | 23.0  | 1.5   | 50.7  | O       | COG0443                                                                                 | Molecular chaperone                                                                                                                                                                                                                                                                                                                                                                                                                                                                                                                                                                                                                                         |
| TS28Fae14370 CDS CDS    | 693.5 | 48.0  | 47.8  | O       | COG0071                                                                                 | Molecular chaperone (small heat shock protein)                                                                                                                                                                                                                                                                                                                                                                                                                                                                                                                                                                                                              |
| BactD14216 CDS CDS      | 12.0  | 0.8   | 47.6  | O       | COG0545                                                                                 | FKBP-type peptidyl-prolyl cis-trans isomerases I                                                                                                                                                                                                                                                                                                                                                                                                                                                                                                                                                                                                            |
| Bste3230 CDS CDS        | 21.5  | 1.5   | 47.4  | O       | COG0760                                                                                 | Parvulin-like peptidyl-prolyl isomerase                                                                                                                                                                                                                                                                                                                                                                                                                                                                                                                                                                                                                     |
| Bdor1245 CDS CDS        | 26.5  | 2.0   | 43.8  | O       | COG0071                                                                                 | Molecular chaperone (small heat shock protein)                                                                                                                                                                                                                                                                                                                                                                                                                                                                                                                                                                                                              |
| TS28Fae21987 CDS CDS    | 131.8 | 10.0  | 43.6  | O       | COG0071                                                                                 | Molecular chaperone (small heat shock protein)                                                                                                                                                                                                                                                                                                                                                                                                                                                                                                                                                                                                              |
| Pmer2603 CDS CDS        | 6.5   | 0.5   | 43.0  | O       | COG0545                                                                                 | FKBP-type peptidyl-prolyl cis-trans isomerases I                                                                                                                                                                                                                                                                                                                                                                                                                                                                                                                                                                                                            |
| Cnex0251 CDS CDS        | 13.0  | 1.0   | 43.0  | O       | COG0443                                                                                 | Molecular chaperone                                                                                                                                                                                                                                                                                                                                                                                                                                                                                                                                                                                                                                         |
| Pmer3472 CDS CDS        | 86.0  | 7.0   | 40.6  | O       | COG0330                                                                                 | Membrane protease subunits, stomatin/prohibitin homologs                                                                                                                                                                                                                                                                                                                                                                                                                                                                                                                                                                                                    |
| Bdor3868 CDS CDS        | 66.5  | 6.0   | 36.7  | O       | COG0265                                                                                 | Trypsin-like serine proteases, typically periplasmic, contain C-terminal PDZ domain                                                                                                                                                                                                                                                                                                                                                                                                                                                                                                                                                                         |
| TS28Par2214 CDS CDS     | 5.0   | 0.5   | 33.1  | O       | COG0576                                                                                 | Molecular chaperone GrpE (heat shock protein)                                                                                                                                                                                                                                                                                                                                                                                                                                                                                                                                                                                                               |
| BactD10814 CDS CDS      | 10.0  | 1.0   | 33.1  | O       | COG0071                                                                                 | Molecular chaperone (small heat shock protein)                                                                                                                                                                                                                                                                                                                                                                                                                                                                                                                                                                                                              |
| PRABACTJOHN0976 CDS CDS | 19.5  | 2.0   | 32.2  | O       | COG0542                                                                                 | ATPases with chaperone activity, ATP-binding subunit                                                                                                                                                                                                                                                                                                                                                                                                                                                                                                                                                                                                        |
| Casp2870 CDS CDS        | 9.0   | 1.0   | 29.8  | O       | COG0466                                                                                 | ATP-dependent Lon protease, bacterial type                                                                                                                                                                                                                                                                                                                                                                                                                                                                                                                                                                                                                  |
| TS29Bac10141 CDS CDS    | 52.5  | 6.0   | 28.9  | O       | COG0071                                                                                 | Molecular chaperone (small heat shock protein)                                                                                                                                                                                                                                                                                                                                                                                                                                                                                                                                                                                                              |
| TS29Rum12156 CDS CDS    | 17.0  | 2.0   | 28.1  | O       | COG0691                                                                                 | tmRNA-binding protein                                                                                                                                                                                                                                                                                                                                                                                                                                                                                                                                                                                                                                       |



|                      |       |      |      |   |                         |                                                                                                                                                          |
|----------------------|-------|------|------|---|-------------------------|----------------------------------------------------------------------------------------------------------------------------------------------------------|
| Bxy13171 CDS CDS     | 2.8   | 0.3  | 28.1 | 0 | COG0612 COG1025         | Predicted Zn-dependent peptidases Secreted/periplasmic Zn-dependent peptidases. insulinase-like                                                          |
| TS28Ali1994 CDS CDS  | 408.0 | 49.0 | 27.5 | 0 | COG1572 COG1404 COG4935 | Uncharacterized conserved protein Subtilisin-like serine proteases Regulatory P domain of the subtilisin-like proprotein convertases and other proteases |
| Bdor0083 CDS CDS     | 89.7  | 11.0 | 27.0 | 0 | COG0459                 | Chaperonin GroEL (HSP60 family)                                                                                                                          |
| Pmer2685 CDS CDS     | 8.0   | 1.0  | 26.5 | 0 | COG1180                 | Pyruvate-formate lyase-activating enzyme                                                                                                                 |
| RintL11446 CDS CDS   | 8.0   | 1.0  | 26.5 | 0 | COG1180                 | Pyruvate-formate lyase-activating enzyme                                                                                                                 |
| TS29Bac00096 CDS CDS | 8.0   | 1.0  | 26.5 | 0 | COG0542                 | ATPases with chaperone activity, ATP-binding subunit                                                                                                     |
| Rgna3169 CDS CDS     | 4.0   | 0.5  | 26.5 | 0 | COG0465                 | ATP-dependent Zn proteases                                                                                                                               |
| Caer1725 CDS CDS     | 2.0   | 0.3  | 26.5 | 0 | COG0443                 | Molecular chaperone                                                                                                                                      |
| Bste0559 CDS CDS     | 15.5  | 2.0  | 25.6 | 0 | COG0265                 | Trypsin-like serine proteases, typically periplasmic, contain C-terminal PDZ domain                                                                      |
| Msmi740182 CDS CDS   | 3.8   | 0.5  | 25.4 | 0 | COG1222                 | ATP-dependent 26S proteasome regulatory subunit                                                                                                          |
| Pmer1047 CDS CDS     | 7.5   | 1.0  | 24.8 | 0 | COG0501 COG4783 COG4784 | Zn-dependent protease with chaperone function Putative Zn-dependent protease, contains TPR repeats Putative Zn-dependent protease                        |
| Pmer0348 CDS CDS     | 25.0  | 3.5  | 23.6 | 0 | COG0542                 | ATPases with chaperone activity, ATP-binding subunit                                                                                                     |
| Bste2071 CDS CDS     | 7.0   | 1.0  | 23.1 | 0 | COG0719                 | ABC-type transport system involved in Fe-S cluster assembly, permease component                                                                          |
| TS29Bac00073 CDS CDS | 3.5   | 0.5  | 23.1 | 0 | COG0443                 | Molecular chaperone                                                                                                                                      |
| Rgna0855 CDS CDS     | 7.0   | 1.0  | 23.1 | 0 | COG0071                 | Molecular chaperone (small heat shock protein)                                                                                                           |
| Pmer0928 CDS CDS     | 23.3  | 3.5  | 22.0 | 0 | COG0459                 | Chaperonin GroEL (HSP60 family)                                                                                                                          |
| Msmi740920 CDS CDS   | 16.4  | 2.5  | 21.6 | 0 | COG0071                 | Molecular chaperone (small heat shock protein)                                                                                                           |
| Bdor3251 CDS CDS     | 26.0  | 4.0  | 21.5 | 0 | COG0484                 | DnaJ-class molecular chaperone with C-terminal Zn finger domain                                                                                          |
| Msmi750995 CDS CDS   | 3.3   | 0.5  | 21.5 | 0 | COG0068 COG0298         | Hydrogenase maturation factor Hydrogenase maturation factor                                                                                              |
| TS28Fae20436 CDS CDS | 216.3 | 35.0 | 20.4 | 0 | COG0071                 | Molecular chaperone (small heat shock protein)                                                                                                           |
| Msmi750701 CDS CDS   | 11.1  | 1.8  | 20.0 | 0 | COG4070                 | Predicted peptidyl-prolyl cis-trans isomerase (rotamase), cyclophilin family                                                                             |
| Bryfor2652 CDS CDS   | 6.0   | 1.0  | 19.8 | 0 | COG1219                 | ATP-dependent protease Clp, ATPase subunit                                                                                                               |
| Bdor3252 CDS CDS     | 21.0  | 3.5  | 19.8 | 0 | COG0576                 | Molecular chaperone GrpE (heat shock protein)                                                                                                            |
| Rbro0804 CDS CDS     | 3.0   | 0.5  | 19.8 | 0 | COG0542                 | ATPases with chaperone activity, ATP-binding subunit                                                                                                     |
| Ehal0046 CDS CDS     | 3.0   | 0.5  | 19.8 | 0 | COG0409                 | Hydrogenase maturation factor                                                                                                                            |
| Pmer3440 CDS CDS     | 23.5  | 4.0  | 19.4 | 0 | COG2077                 | Peroxiredoxin                                                                                                                                            |
| Msmi750927 CDS CDS   | 3.8   | 0.7  | 18.6 | 0 | COG0638                 | 20S proteasome, alpha and beta subunits                                                                                                                  |
| Ceut2654 CDS CDS     | 5.5   | 1.0  | 18.3 | 0 | COG0443                 | Molecular chaperone                                                                                                                                      |
| Bdor1200 CDS CDS     | 86.0  | 16.3 | 17.4 | 0 | COG0542                 | ATPases with chaperone activity, ATP-binding subunit                                                                                                     |
| TS28Fae17572 CDS CDS | 187.5 | 36.0 | 17.2 | 0 | COG0071                 | Molecular chaperone (small heat shock protein)                                                                                                           |
| Bste0743 CDS CDS     | 51.0  | 10.0 | 16.9 | 0 | COG0443                 | Molecular chaperone                                                                                                                                      |
| TS28Fae11914 CDS CDS | 10.0  | 2.0  | 16.5 | 0 | COG0691                 | tmRNA-binding protein                                                                                                                                    |
| CspS22208 CDS CDS    | 2.5   | 0.5  | 16.5 | 0 | COG0652                 | Peptidyl-prolyl cis-trans isomerase (rotamase) - cyclophilin family                                                                                      |
| Pmer0297 CDS CDS     | 10.0  | 2.0  | 16.5 | 0 | COG0602 COG3759         | Organic radical activating enzymes Predicted membrane protein                                                                                            |
| Hfil12561 CDS CDS    | 5.0   | 1.0  | 16.5 | 0 | COG0326                 | Molecular chaperone, HSP90 family                                                                                                                        |
| TS28Rum01574 CDS CDS | 10.0  | 2.0  | 16.5 | 0 | COG0234                 | Co-chaperonin GroES (HSP10)                                                                                                                              |
| TS28Fae09723 CDS CDS | 19.3  | 4.0  | 16.0 | 0 | COG0544                 | FKBP-type peptidyl-prolyl cis-trans isomerase (trigger factor)                                                                                           |
| Pmer1290 CDS CDS     | 9.5   | 2.0  | 15.7 | 0 | COG0719                 | ABC-type transport system involved in Fe-S cluster assembly, permease component                                                                          |
| TS29Fae06754 CDS CDS | 11.8  | 2.5  | 15.7 | 0 | COG0071                 | Molecular chaperone (small heat shock protein)                                                                                                           |
| TS28Rum16009 CDS CDS | 33.0  | 7.0  | 15.6 | 0 | COG0265                 | Trypsin-like serine proteases, typically periplasmic, contain C-terminal PDZ domain                                                                      |
| TS29Fae05844 CDS CDS | 9.3   | 2.0  | 15.4 | 0 | COG0459                 | Chaperonin GroEL (HSP60 family)                                                                                                                          |
| Bste1251 CDS CDS     | 70.0  | 15.0 | 15.4 | 0 | COG0071                 | Molecular chaperone (small heat shock protein)                                                                                                           |
| TS28Ali0411 CDS CDS  | 102.0 | 23.0 | 14.7 | 0 | COG0545                 | FKBP-type peptidyl-prolyl cis-trans isomerases 1                                                                                                         |
| TS28Ali2164 CDS CDS  | 39.0  | 9.0  | 14.3 | 0 | COG0234                 | Co-chaperonin GroES (HSP10)                                                                                                                              |
| Bova3457 CDS CDS     | 4.3   | 1.0  | 14.1 | 0 | COG0459                 | Chaperonin GroEL (HSP60 family)                                                                                                                          |
| CspM6211052 CDS CDS  | 4.3   | 1.0  | 14.1 | 0 | COG0326                 | Molecular chaperone, HSP90 family                                                                                                                        |
| Bdor3308 CDS CDS     | 8.0   | 2.0  | 13.2 | 0 | COG3187                 | Heat shock protein                                                                                                                                       |
| Bste2831 CDS CDS     | 8.0   | 2.0  | 13.2 | 0 | COG1076                 | DnaJ-domain-containing proteins 1                                                                                                                        |
| Bste1613 CDS CDS     | 28.0  | 7.0  | 13.2 | 0 | COG0484                 | DnaJ-class molecular chaperone with C-terminal Zn finger domain                                                                                          |
| Cbol0967 CDS CDS     | 6.0   | 1.5  | 13.2 | 0 | COG0465                 | ATP-dependent Zn proteases                                                                                                                               |
| TS29Bif0496 CDS CDS  | 1.3   | 0.3  | 13.2 | 0 | COG0450                 | Peroxiredoxin                                                                                                                                            |
| Bcat1012 CDS CDS     | 1.0   | 0.3  | 13.2 | 0 | COG0443                 | Molecular chaperone                                                                                                                                      |
| CspS20336 CDS CDS    | 2.0   | 0.5  | 13.2 | 0 | COG0425                 | Predicted redox protein, regulator of disulfide bond formation                                                                                           |
| TS29Fae04889 CDS CDS | 2.0   | 0.5  | 13.2 | 0 | COG0326                 | Molecular chaperone, HSP90 family                                                                                                                        |
| Rbro0565 CDS CDS     | 3.3   | 0.8  | 13.2 | 0 | COG0265                 | Trypsin-like serine proteases, typically periplasmic, contain C-terminal PDZ domain                                                                      |
| Dfor0868 CDS CDS     | 4.0   | 1.0  | 13.2 | 0 | COG0234                 | Co-chaperonin GroES (HSP10)                                                                                                                              |
| Dfor0429 CDS CDS     | 4.0   | 1.0  | 13.2 | 0 | COG0071                 | Molecular chaperone (small heat shock protein)                                                                                                           |
| TS28Clo02161 CDS CDS | 11.5  | 3.0  | 12.7 | 0 | COG0071                 | Molecular chaperone (small heat shock protein)                                                                                                           |
| TS28Bac6715 CDS CDS  | 119.5 | 31.3 | 12.6 | 0 | COG0542                 | ATPases with chaperone activity, ATP-binding subunit                                                                                                     |
| TS28Fae13136 CDS CDS | 49.1  | 13.0 | 12.5 | 0 | COG0071                 | Molecular chaperone (small heat shock protein)                                                                                                           |
| Bdor3309 CDS CDS     | 63.2  | 17.0 | 12.3 | 0 | COG0443                 | Molecular chaperone                                                                                                                                      |
| Bdor0014 CDS CDS     | 11.0  | 3.0  | 12.1 | 0 | COG0760                 | Parvulin-like peptidyl-prolyl isomerase                                                                                                                  |
| Casp4535 CDS CDS     | 11.0  | 3.0  | 12.1 | 0 | COG0465                 | ATP-dependent Zn proteases                                                                                                                               |
| Bste1996 CDS CDS     | 11.0  | 3.0  | 12.1 | 0 | COG0450                 | Peroxiredoxin                                                                                                                                            |
| TS28Eub1085 CDS CDS  | 18.0  | 5.0  | 11.9 | 0 | COG1180                 | Pyruvate-formate lyase-activating enzyme                                                                                                                 |
| BactD11022 CDS CDS   | 2.4   | 0.7  | 11.9 | 0 | COG0484 COG2214         | DnaJ-class molecular chaperone with C-terminal Zn finger domain DnaJ-class molecular chaperone                                                           |
| TS29Bac09228 CDS CDS | 2.4   | 0.7  | 11.9 | 0 | COG0484 COG2214         | DnaJ-class molecular chaperone with C-terminal Zn finger domain DnaJ-class molecular chaperone                                                           |
| Bxy11307 CDS CDS     | 2.4   | 0.7  | 11.9 | 0 | COG0484 COG2214         | DnaJ-class molecular chaperone with C-terminal Zn finger domain DnaJ-class molecular chaperone                                                           |
| BactD11682 CDS CDS   | 1.2   | 0.3  | 11.9 | 0 | COG0465                 | ATP-dependent Zn proteases                                                                                                                               |
| TS29Eub2133 CDS CDS  | 7.0   | 2.0  | 11.6 | 0 | COG0443                 | Molecular chaperone                                                                                                                                      |
| BactD23099 CDS CDS   | 3.5   | 1.0  | 11.6 | 0 | COG0326                 | Molecular chaperone, HSP90 family                                                                                                                        |
| TS28Rum16008 CDS CDS | 17.0  | 5.0  | 11.2 | 0 | COG0265                 | Trypsin-like serine proteases, typically periplasmic, contain C-terminal PDZ domain                                                                      |
| Bdor0305 CDS CDS     | 10.0  | 3.0  | 11.0 | 0 | COG0545                 | FKBP-type peptidyl-prolyl cis-trans isomerases 1                                                                                                         |
| Csci3642 CDS CDS     | 10.0  | 3.0  | 11.0 | 0 | COG0326                 | Molecular chaperone, HSP90 family                                                                                                                        |

|                        |       |       |       |       |                                 |                                                                                                                                                                                                                                                                                                                                                                          |
|------------------------|-------|-------|-------|-------|---------------------------------|--------------------------------------------------------------------------------------------------------------------------------------------------------------------------------------------------------------------------------------------------------------------------------------------------------------------------------------------------------------------------|
| TS28Met0924 CDS CDS    | 6.6   | 2.0   | 10.9  | O     | COG0071                         | Molecular chaperone (small heat shock protein)                                                                                                                                                                                                                                                                                                                           |
| TS29Rum21190 CDS CDS   | 91.5  | 28.0  | 10.8  | O     | COG0071                         | Molecular chaperone (small heat shock protein)                                                                                                                                                                                                                                                                                                                           |
| TS28RumUnc0269 CDS CDS | 16.0  | 5.0   | 10.6  | O     | COG1066                         | Predicted ATP-dependent serine protease                                                                                                                                                                                                                                                                                                                                  |
| TS28Eub1364 CDS CDS    | 1.0   | 34.0  | 0.1   | O     | COG0326                         | Molecular chaperone, HSP90 family                                                                                                                                                                                                                                                                                                                                        |
| TS28Met0899 CDS CDS    | 1.0   | 35.0  | 0.1   | O     | COG0826                         | Collagenase and related proteases                                                                                                                                                                                                                                                                                                                                        |
| TS28Rum07430 CDS CDS   | 0.5   | 18.0  | 0.1   | O     | COG0443                         | Molecular chaperone                                                                                                                                                                                                                                                                                                                                                      |
| Robe1902 CDS CDS       | 1.0   | 36.0  | 0.1   | O     | COG0326                         | Molecular chaperone, HSP90 family                                                                                                                                                                                                                                                                                                                                        |
| TS28Eub1127 CDS CDS    | 0.5   | 18.5  | 0.1   | O     | COG0760                         | Parvulin-like peptidyl-prolyl isomerase                                                                                                                                                                                                                                                                                                                                  |
| TS28Fae21746 CDS CDS   | 1.0   | 37.0  | 0.1   | O     | COG0465                         | ATP-dependent Zn proteases                                                                                                                                                                                                                                                                                                                                               |
| TS29Rum00846 CDS CDS   | 2.0   | 79.0  | 0.1   | O     | COG0465                         | ATP-dependent Zn proteases                                                                                                                                                                                                                                                                                                                                               |
| TS28Fae22203 CDS CDS   | 1.0   | 40.0  | 0.1   | O     | COG0561 COG0652                 | Predicted hydrolases of the HAD superfamily Peptidyl-prolyl cis-trans isomerase (rotamase) - cyclophilin family                                                                                                                                                                                                                                                          |
| TS28Bif4106 CDS CDS    | 1.3   | 51.0  | 0.1   | O     | COG0465                         | ATP-dependent Zn proteases                                                                                                                                                                                                                                                                                                                                               |
| TS28Fae10193 CDS CDS   | 1.0   | 41.0  | 0.1   | O     | COG0464 COG0790                 | ATPases of the AAA+ class FOG: TPR repeat, SEL1 subfamily                                                                                                                                                                                                                                                                                                                |
| TS29Bif0183 CDS CDS    | 0.7   | 27.7  | 0.1   | O     | COG0542                         | ATPases with chaperone activity, ATP-binding subunit                                                                                                                                                                                                                                                                                                                     |
| TS28Fae03681 CDS CDS   | 0.4   | 17.5  | 0.1   | O     | COG0459                         | Chaperonin GroEL (HSP60 family)                                                                                                                                                                                                                                                                                                                                          |
| TS28Fae07842 CDS CDS   | 0.5   | 22.0  | 0.1   | O     | COG0542                         | ATPases with chaperone activity, ATP-binding subunit                                                                                                                                                                                                                                                                                                                     |
| TS28Bac6015 CDS CDS    | 0.5   | 22.3  | 0.1   | O     | COG1404 COG3291                 | Subtilisin-like serine proteases FOG: PKD repeat                                                                                                                                                                                                                                                                                                                         |
| Robe3122 CDS CDS       | 1.0   | 45.0  | 0.1   | O     | COG1975                         | Xanthine and CO dehydrogenases maturation factor, XdhC/CoxF family                                                                                                                                                                                                                                                                                                       |
| TS28Fae12518 CDS CDS   | 2.0   | 92.5  | 0.1   | O     | COG0464 COG0790                 | ATPases of the AAA+ class FOG: TPR repeat, SEL1 subfamily                                                                                                                                                                                                                                                                                                                |
| TS28Fae01994 CDS CDS   | 0.5   | 23.5  | 0.1   | O     | COG0606                         | Predicted ATPase with chaperone activity                                                                                                                                                                                                                                                                                                                                 |
| TS29Rum00031 CDS CDS   | 1.0   | 48.5  | 0.1   | O     | COG0326                         | Molecular chaperone, HSP90 family                                                                                                                                                                                                                                                                                                                                        |
| TS28Met0355 CDS CDS    | 0.3   | 16.7  | 0.1   | O     | COG0719                         | ABC-type transport system involved in Fe-S cluster assembly, permease component                                                                                                                                                                                                                                                                                          |
| TS28Fae16667 CDS CDS   | 1.5   | 76.0  | 0.1   | O     | COG0443                         | Molecular chaperone                                                                                                                                                                                                                                                                                                                                                      |
| TS29Fae05133 CDS CDS   | 0.5   | 25.5  | 0.1   | O     | COG1219                         | ATP-dependent protease Clp, ATPase subunit                                                                                                                                                                                                                                                                                                                               |
| TS28Clo00661 CDS CDS   | 5.0   | 261.0 | 0.1   | O     | COG0542                         | ATPases with chaperone activity, ATP-binding subunit                                                                                                                                                                                                                                                                                                                     |
| TS28Bif5205 CDS CDS    | 0.3   | 17.5  | 0.1   | O     | COG0602                         | Organic radical activating enzymes                                                                                                                                                                                                                                                                                                                                       |
| Ebi0548 CDS CDS        | 0.5   | 27.0  | 0.1   | O     | COG2020                         | Putative protein-S-isoprenylcysteine methyltransferase                                                                                                                                                                                                                                                                                                                   |
| TS28Rum14890 CDS CDS   | 0.5   | 27.0  | 0.1   | O     | COG0826                         | Collagenase and related proteases                                                                                                                                                                                                                                                                                                                                        |
| TS28Met0103 CDS CDS    | 0.3   | 18.0  | 0.1   | O     | COG0484                         | DnaJ-class molecular chaperone with C-terminal Zn finger domain                                                                                                                                                                                                                                                                                                          |
| TS28Eub1030 CDS CDS    | 1.0   | 55.0  | 0.1   | O     | COG0561 COG4696 COG0652         | Predicted hydrolases of the HAD superfamily Uncharacterized protein conserved in bacterial Peptidyl-prolyl cis-trans isomerase (rotamase) - cyclophilin family                                                                                                                                                                                                           |
| TS29Bif1463 CDS CDS    | 0.3   | 14.0  | 0.1   | O     | COG0465                         | ATP-dependent Zn proteases                                                                                                                                                                                                                                                                                                                                               |
| TS28Fae17720 CDS CDS   | 1.5   | 86.5  | 0.1   | O     | COG0606                         | Predicted ATPase with chaperone activity                                                                                                                                                                                                                                                                                                                                 |
| TS28Fae07982 CDS CDS   | 0.7   | 41.0  | 0.1   | O     | COG0542                         | ATPases with chaperone activity, ATP-binding subunit                                                                                                                                                                                                                                                                                                                     |
| TS28Eub4241 CDS CDS    | 0.3   | 21.5  | 0.1   | O     | COG0826                         | Collagenase and related proteases                                                                                                                                                                                                                                                                                                                                        |
| TS28Clo01165 CDS CDS   | 3.0   | 194.0 | 0.1   | O     | COG0719                         | ABC-type transport system involved in Fe-S cluster assembly, permease component                                                                                                                                                                                                                                                                                          |
| TS28Clo01078 CDS CDS   | 4.0   | 259.0 | 0.1   | O     | COG0826                         | Collagenase and related proteases                                                                                                                                                                                                                                                                                                                                        |
| TS29Rum13627 CDS CDS   | 0.3   | 22.0  | 0.1   | O     | COG0826                         | Collagenase and related proteases                                                                                                                                                                                                                                                                                                                                        |
| TS28Fae11996 CDS CDS   | 1.0   | 66.0  | 0.1   | O     | COG0484 COG2214 COG4930 COG3671 | DnaJ-class molecular chaperone with C-terminal Zn finger domain DnaJ-class molecular chaperone Predicted ATP-dependent Lon-type protease Predicted membrane protein                                                                                                                                                                                                      |
| TS28Bif2933 CDS CDS    | 0.5   | 35.0  | 0.0   | O     | COG4930                         | Predicted ATP-dependent Lon-type protease                                                                                                                                                                                                                                                                                                                                |
| TS29Bif3617 CDS CDS    | 0.2   | 12.3  | 0.0   | O     | COG0542                         | ATPases with chaperone activity, ATP-binding subunit                                                                                                                                                                                                                                                                                                                     |
| TS28Fae21021 CDS CDS   | 0.7   | 49.5  | 0.0   | O     | COG0542                         | ATPases with chaperone activity, ATP-binding subunit                                                                                                                                                                                                                                                                                                                     |
| TS28Eub8507 CDS CDS    | 1.0   | 75.5  | 0.0   | O     | COG1975 COG2258                 | Xanthine and CO dehydrogenases maturation factor, XdhC/CoxF family Uncharacterized protein conserved in bacteria                                                                                                                                                                                                                                                         |
| TS28Fae00462 CDS CDS   | 0.5   | 38.5  | 0.0   | O     | COG0326                         | Molecular chaperone, HSP90 family                                                                                                                                                                                                                                                                                                                                        |
| TS28Clo01582 CDS CDS   | 4.0   | 314.5 | 0.0   | O     | COG0466                         | ATP-dependent Lon protease, bacterial type                                                                                                                                                                                                                                                                                                                               |
| TS28Fae20118 CDS CDS   | 0.5   | 39.5  | 0.0   | O     | COG1219                         | ATP-dependent protease Clp, ATPase subunit                                                                                                                                                                                                                                                                                                                               |
| TS28Clo00707 CDS CDS   | 3.0   | 246.0 | 0.0   | O     | COG0443                         | Molecular chaperone                                                                                                                                                                                                                                                                                                                                                      |
| TS28Clo01090 CDS CDS   | 2.0   | 165.0 | 0.0   | O     | COG0826                         | Collagenase and related proteases                                                                                                                                                                                                                                                                                                                                        |
| TS28Clo01685 CDS CDS   | 3.0   | 248.0 | 0.0   | O     | COG0326                         | Molecular chaperone, HSP90 family                                                                                                                                                                                                                                                                                                                                        |
| TS28Eub8725 CDS CDS    | 1.0   | 84.5  | 0.0   | O     | COG0265                         | Trypsin-like serine proteases, typically periplasmic, contain C-terminal PDZ domain                                                                                                                                                                                                                                                                                      |
| TS28Fae21766 CDS CDS   | 0.2   | 17.0  | 0.0   | O     | COG0826                         | Collagenase and related proteases                                                                                                                                                                                                                                                                                                                                        |
| TS28Eub6418 CDS CDS    | 1.0   | 87.0  | 0.0   | O     | COG0606                         | Predicted ATPase with chaperone activity                                                                                                                                                                                                                                                                                                                                 |
| TS28Fae22642 CDS CDS   | 0.5   | 55.5  | 0.0   | O     | COG0465                         | ATP-dependent Zn proteases                                                                                                                                                                                                                                                                                                                                               |
| TS28Eub5093 CDS CDS    | 0.3   | 71.5  | 0.0   | O     | COG4826                         | Serine protease inhibitor                                                                                                                                                                                                                                                                                                                                                |
| TS28Bif2086 CDS CDS    | 0.2   | 36.9  | 0.0   | O     | COG0542                         | ATPases with chaperone activity, ATP-binding subunit                                                                                                                                                                                                                                                                                                                     |
| TS28Ali2039 CDS CDS    | 273.0 | 8.0   | 112.8 | O C   | COG0526                         | Thiol-disulfide isomerase and thioredoxins                                                                                                                                                                                                                                                                                                                               |
| TS29Bac07744 CDS CDS   | 9.7   | 0.3   | 95.9  | O C   | COG0526 COG3118                 | Thiol-disulfide isomerase and thioredoxins Thioredoxin domain-containing protein                                                                                                                                                                                                                                                                                         |
| TS28Ali1087 CDS CDS    | 61.0  | 10.0  | 20.2  | O C   | COG0526                         | Thiol-disulfide isomerase and thioredoxins                                                                                                                                                                                                                                                                                                                               |
| TS29Bac06013 CDS CDS   | 18.0  | 3.0   | 19.8  | O C   | COG0526 COG3118                 | Thiol-disulfide isomerase and thioredoxins Thioredoxin domain-containing protein                                                                                                                                                                                                                                                                                         |
| TS28Fae10126 CDS CDS   | 28.2  | 5.0   | 18.6  | O C   | COG0526                         | Thiol-disulfide isomerase and thioredoxins                                                                                                                                                                                                                                                                                                                               |
| TS28Met0329 CDS CDS    | 14.5  | 3.3   | 14.8  | O C   | COG0526                         | Thiol-disulfide isomerase and thioredoxins                                                                                                                                                                                                                                                                                                                               |
| TS28Fae21085 CDS CDS   | 25.2  | 7.0   | 11.9  | O C   | COG0526                         | Thiol-disulfide isomerase and thioredoxins                                                                                                                                                                                                                                                                                                                               |
| TS28Clo00713 CDS CDS   | 1.0   | 35.0  | 0.1   | O C   | COG0526                         | Thiol-disulfide isomerase and thioredoxins                                                                                                                                                                                                                                                                                                                               |
| TS28Met0648 CDS CDS    | 0.3   | 11.3  | 0.1   | O C   | COG0526 COG0492                 | Thiol-disulfide isomerase and thioredoxins Thioredoxin reductase                                                                                                                                                                                                                                                                                                         |
| TS29Clo0596 CDS CDS    | 1.5   | 72.0  | 0.1   | O C   | COG0526 COG0492                 | Thiol-disulfide isomerase and thioredoxins Thioredoxin reductase                                                                                                                                                                                                                                                                                                         |
| TS28Fae07912 CDS CDS   | 11.0  | 2.0   | 18.2  | O C V | COG2274 COG1132 COG5265 COG4987 | ABC-type bacteriocin/lantibiotic exporters, contain an N-terminal double-glycine peptidase domain ABC-type multidrug transport system, ATPase and permease components ABC-type transport system involved in Fe-S cluster assembly, permease and ATPase components ABC-type transport system involved in cytochrome bd biosynthesis, fused ATPase and permease components |
| TS28Eub6176 CDS CDS    | 2.0   | 67.0  | 0.1   | O C V | COG1132 COG4987                 | ABC-type multidrug transport system, ATPase and permease components ABC-type transport system involved in cytochrome bd biosynthesis, fused ATPase and permease components                                                                                                                                                                                               |

|                         |       |       |       |       |                                         |                                                                                                                                                                                                                                                                                                                                                                          |
|-------------------------|-------|-------|-------|-------|-----------------------------------------|--------------------------------------------------------------------------------------------------------------------------------------------------------------------------------------------------------------------------------------------------------------------------------------------------------------------------------------------------------------------------|
| TS28Clo00459 CDS CDS    | 4.0   | 143.0 | 0.1   | O C V | COG1132 COG5265 COG4988 COG4987         | ABC-type multidrug transport system, ATPase and permease components ABC-type transport system involved in Fe-S cluster assembly, permease and ATPase components ABC-type transport system involved in cytochrome bd biosynthesis, ATPase and permease components ABC-type transport system involved in cytochrome bd biosynthesis, fused ATPase and permease components  |
| TS28Fae16675 CDS CDS    | 1.5   | 58.5  | 0.1   | O C V | COG2274 COG1132 COG5265 COG4988         | ABC-type bacteriocin/lantibiotic exporters, contain an N-terminal double-glycine peptidase domain ABC-type multidrug transport system, ATPase and permease components ABC-type transport system involved in Fe-S cluster assembly, permease and ATPase components ABC-type transport system involved in cytochrome bd biosynthesis, ATPase and permease components       |
| TS28Clo00625 CDS CDS    | 1.0   | 217.0 | 0.0   | O C V | COG2274 COG1132 COG5265 COG4987         | ABC-type bacteriocin/lantibiotic exporters, contain an N-terminal double-glycine peptidase domain ABC-type multidrug transport system, ATPase and permease components ABC-type transport system involved in Fe-S cluster assembly, permease and ATPase components ABC-type transport system involved in cytochrome bd biosynthesis, fused ATPase and permease components |
| ShigspD91627 CDS CDS    | 4.9   | 0.5   | 32.5  | O I   | COG0826 COG3154                         | Collagenase and related proteases Putative lipid carrier protein                                                                                                                                                                                                                                                                                                         |
| TS28Met1564 CDS CDS     | 0.5   | 26.3  | 0.1   | O I   | COG0464 COG1372                         | ATPases of the AAA+ class Intein/homine endonuclease                                                                                                                                                                                                                                                                                                                     |
| TS28Fae01888 CDS CDS    | 0.5   | 17.0  | 0.1   | O M   | COG3914 COG0463 COG1215 COG1216 COG1442 | Predicted O-linked N-acetylglucosamine transferase, SPINDLY family Glycosyltransferases involved in cell wall biogenesis Glycosyltransferases, probably involved in cell wall biogenesis Predicted glycosyltransferases Lipopolysaccharide biosynthesis proteins, LPS:glycosyltransferases                                                                               |
| Bryfor2651 CDS CDS      | 3.0   | 0.2   | 49.6  | O U   | COG0740                                 | Protease subunit of ATP-dependent Clp proteases                                                                                                                                                                                                                                                                                                                          |
| Bste2437 CDS CDS        | 15.0  | 3.0   | 16.5  | O U   | COG0616                                 | Periplasmic serine proteases (ClpP class)                                                                                                                                                                                                                                                                                                                                |
| TS28Rum06260 CDS CDS    | 9.0   | 2.0   | 14.9  | O U   | COG0740                                 | Protease subunit of ATP-dependent Clp proteases                                                                                                                                                                                                                                                                                                                          |
| TS29Fae07669 CDS CDS    | 12.0  | 3.0   | 13.2  | O U   | COG0740                                 | Protease subunit of ATP-dependent Clp proteases                                                                                                                                                                                                                                                                                                                          |
| b1978 CDS adhesin       | 21.0  | 1.0   | 69.4  | O U W | COG1404 COG3210 COG5295                 | Subtilisin-like serine proteases Large exoproteins involved in heme utilization or adhesion Autotransporter adhesin                                                                                                                                                                                                                                                      |
| TS29Fae08957 CDS CDS    | 4.5   | 0.5   | 29.8  | O V   | COG2274 COG1132 COG5265                 | ABC-type bacteriocin/lantibiotic exporters, contain an N-terminal double-glycine peptidase domain ABC-type multidrug transport system, ATPase and permease components ABC-type transport system involved in Fe-S cluster assembly, permease and ATPase components                                                                                                        |
| TS28Clo03028 CDS CDS    | 0.3   | 12.0  | 0.1   | O V   | COG1132 COG5265                         | ABC-type multidrug transport system, ATPase and permease components ABC-type transport system involved in Fe-S cluster assembly, permease and ATPase components                                                                                                                                                                                                          |
| Msmi740561 CDS CDS      | 44.3  | 0.3   | 585.3 | P     | COG0288                                 | Carbonic anhydrase                                                                                                                                                                                                                                                                                                                                                       |
| Msmi750397 CDS CDS      | 20.8  | 0.7   | 102.9 | P     | COG1528                                 | Ferritin-like protein                                                                                                                                                                                                                                                                                                                                                    |
| TS28Met0681 CDS CDS     | 20.8  | 0.7   | 102.9 | P     | COG1528                                 | Ferritin-like protein                                                                                                                                                                                                                                                                                                                                                    |
| Msmi741285 CDS CDS      | 20.8  | 0.7   | 102.9 | P     | COG1528                                 | Ferritin-like protein                                                                                                                                                                                                                                                                                                                                                    |
| ShigspD90636 CDS CDS    | 14.3  | 0.5   | 94.8  | P     | COG0370 COG1918                         | Fe2+ transport system protein B Fe2+ transport system protein A                                                                                                                                                                                                                                                                                                          |
| Pmer2111 CDS CDS        | 22.5  | 1.0   | 74.4  | P     | COG0605                                 | Superoxide dismutase                                                                                                                                                                                                                                                                                                                                                     |
| TS28Met0788 CDS CDS     | 43.7  | 2.0   | 72.2  | P     | COG1930                                 | ABC-type cobalt transport system, periplasmic component                                                                                                                                                                                                                                                                                                                  |
| TS29Met1084 CDS CDS     | 12.2  | 0.7   | 60.4  | P     | COG0310                                 | ABC-type Co2+ transport system, permease component                                                                                                                                                                                                                                                                                                                       |
| Pmer2304 CDS CDS        | 472.5 | 26.0  | 60.1  | P     | COG4771                                 | Outer membrane receptor for ferrienterochelin and colicins                                                                                                                                                                                                                                                                                                               |
| Msmi740636 CDS CDS      | 4.5   | 0.3   | 59.5  | P     | COG2217                                 | Cation transport ATPase                                                                                                                                                                                                                                                                                                                                                  |
| Pmer2291 CDS CDS        | 17.7  | 1.0   | 58.4  | P     | COG4771                                 | Outer membrane receptor for ferrienterochelin and colicins                                                                                                                                                                                                                                                                                                               |
| Msmi740532 CDS CDS      | 8.0   | 0.5   | 52.9  | P     | COG2217 COG4087                         | Cation transport ATPase/Soluble P-type ATPase                                                                                                                                                                                                                                                                                                                            |
| PRABACTJOHN0577 CDS CDS | 7.0   | 0.5   | 46.3  | P     | COG4771                                 | Outer membrane receptor for ferrienterochelin and colicins                                                                                                                                                                                                                                                                                                               |
| BactD12567 CDS CDS      | 6.5   | 0.5   | 43.0  | P     | COG4771                                 | Outer membrane receptor for ferrienterochelin and colicins                                                                                                                                                                                                                                                                                                               |
| TS29Bac03737 CDS CDS    | 24.0  | 2.0   | 39.7  | P     | COG0783                                 | DNA-binding ferritin-like protein (oxidative damage protectant)                                                                                                                                                                                                                                                                                                          |
| TS29Bac11512 CDS CDS    | 3.8   | 0.3   | 38.0  | P     | COG0855                                 | Polyphosphate kinase                                                                                                                                                                                                                                                                                                                                                     |
| Pmer1792 CDS CDS        | 22.2  | 2.0   | 36.7  | P     | COG0783                                 | DNA-binding ferritin-like protein (oxidative damage protectant)                                                                                                                                                                                                                                                                                                          |
| TS28Par2210 CDS CDS     | 22.2  | 2.0   | 36.7  | P     | COG0783                                 | DNA-binding ferritin-like protein (oxidative damage protectant)                                                                                                                                                                                                                                                                                                          |
| Bste2867 CDS CDS        | 71.5  | 6.5   | 36.4  | P     | COG4771                                 | Outer membrane receptor for ferrienterochelin and colicins                                                                                                                                                                                                                                                                                                               |
| BactD12886 CDS CDS      | 5.0   | 0.5   | 33.1  | P     | COG4771 COG2304                         | Outer membrane receptor for ferrienterochelin and colicins Uncharacterized protein containing a von Willebrand factor type A (vWA) domain                                                                                                                                                                                                                                |
| Bthe7331666 CDS CDS     | 2.5   | 0.3   | 33.1  | P     | COG4771                                 | Outer membrane receptor for ferrienterochelin and colicins                                                                                                                                                                                                                                                                                                               |
| Bdor1624 CDS CDS        | 77.0  | 8.0   | 31.8  | P     | COG0783                                 | DNA-binding ferritin-like protein (oxidative damage protectant)                                                                                                                                                                                                                                                                                                          |
| BactD11067 CDS CDS      | 3.0   | 0.3   | 29.8  | P     | COG4771                                 | Outer membrane receptor for ferrienterochelin and colicins                                                                                                                                                                                                                                                                                                               |
| TS29Bac06023 CDS CDS    | 9.0   | 1.0   | 29.8  | P     | COG4771                                 | Outer membrane receptor for ferrienterochelin and colicins                                                                                                                                                                                                                                                                                                               |
| Msmi750140 CDS CDS      | 2.3   | 0.3   | 29.8  | P     | COG0004                                 | Ammonia permease                                                                                                                                                                                                                                                                                                                                                         |
| TS28Met0787 CDS CDS     | 13.7  | 1.7   | 27.1  | P     | COG0310                                 | ABC-type Co2+ transport system, permease component                                                                                                                                                                                                                                                                                                                       |
| TS29Bac01385 CDS CDS    | 58.6  | 7.2   | 27.0  | P     | COG4771                                 | Outer membrane receptor for ferrienterochelin and colicins                                                                                                                                                                                                                                                                                                               |
| BactD13475 CDS CDS      | 13.3  | 1.7   | 26.5  | P     | COG4771                                 | Outer membrane receptor for ferrienterochelin and colicins                                                                                                                                                                                                                                                                                                               |
| BactD11759 CDS CDS      | 4.0   | 0.5   | 26.5  | P     | COG3004                                 | Na+/H+ antiporter                                                                                                                                                                                                                                                                                                                                                        |
| TS29Bac07385 CDS CDS    | 4.0   | 0.5   | 26.5  | P     | COG3004                                 | Na+/H+ antiporter                                                                                                                                                                                                                                                                                                                                                        |
| Bdor3002 CDS CDS        | 2.7   | 0.3   | 26.5  | P     | COG0735                                 | Fe2+/Zn2+ uptake regulation proteins                                                                                                                                                                                                                                                                                                                                     |
| BactD12620 CDS CDS      | 3.5   | 0.5   | 25.7  | P     | COG4771                                 | Outer membrane receptor for ferrienterochelin and colicins                                                                                                                                                                                                                                                                                                               |
| Bdor3289 CDS CDS        | 15.5  | 2.0   | 25.6  | P     | COG0735                                 | Fe2+/Zn2+ uptake regulation proteins                                                                                                                                                                                                                                                                                                                                     |
| BactD21974 CDS CDS      | 7.5   | 1.0   | 24.8  | P     | COG1785                                 | Alkaline phosphatase                                                                                                                                                                                                                                                                                                                                                     |
| Bova2659 CDS CDS        | 7.5   | 1.0   | 24.8  | P     | COG1785                                 | Alkaline phosphatase                                                                                                                                                                                                                                                                                                                                                     |
| TS29Fae03267 CDS CDS    | 3.7   | 0.5   | 24.3  | P     | COG1283                                 | Na+/phosphate symporter                                                                                                                                                                                                                                                                                                                                                  |
| BactD12607 CDS CDS      | 1.8   | 0.3   | 23.1  | P     | COG4771                                 | Outer membrane receptor for ferrienterochelin and colicins                                                                                                                                                                                                                                                                                                               |
| Msmi751111 CDS CDS      | 12.3  | 1.8   | 23.1  | P     | COG0288                                 | Carbonic anhydrase                                                                                                                                                                                                                                                                                                                                                       |
| Cspi0989 CDS CDS        | 7.0   | 1.0   | 23.1  | P     | COG0053 COG1433                         | Predicted Co/Zn/Cd cation transporters Uncharacterized conserved protein                                                                                                                                                                                                                                                                                                 |
| Bdor0040 CDS CDS        | 147.3 | 21.5  | 22.7  | P     | COG4771                                 | Outer membrane receptor for ferrienterochelin and colicins                                                                                                                                                                                                                                                                                                               |
| Bdor2203 CDS CDS        | 41.0  | 6.0   | 22.6  | P     | COG0605                                 | Superoxide dismutase                                                                                                                                                                                                                                                                                                                                                     |
| TS28Bac3758 CDS CDS     | 10.0  | 1.5   | 22.0  | P     | COG4771                                 | Outer membrane receptor for ferrienterochelin and colicins                                                                                                                                                                                                                                                                                                               |
| Pmer3368 CDS CDS        | 30.0  | 4.5   | 22.0  | P     | COG4771                                 | Outer membrane receptor for ferrienterochelin and colicins                                                                                                                                                                                                                                                                                                               |
| Msmi750959 CDS CDS      | 1.6   | 0.3   | 21.2  | P     | COG2111                                 | Multisubunit Na+/H+ antiporter, MnhB subunit                                                                                                                                                                                                                                                                                                                             |
| Msmi740720 CDS CDS      | 1.6   | 0.3   | 21.2  | P     | COG2111                                 | Multisubunit Na+/H+ antiporter, MnhB subunit                                                                                                                                                                                                                                                                                                                             |
| Msmi751040 CDS CDS      | 4.5   | 0.8   | 19.8  | P     | COG2217                                 | Cation transport ATPase                                                                                                                                                                                                                                                                                                                                                  |
| Bdor3898 CDS CDS        | 20.0  | 3.5   | 18.9  | P     | COG1528                                 | Ferritin-like protein                                                                                                                                                                                                                                                                                                                                                    |

|                               |      |      |      |   |                         |                                                                                                                                           |
|-------------------------------|------|------|------|---|-------------------------|-------------------------------------------------------------------------------------------------------------------------------------------|
| Rtor0313 CDS CDS              | 17.0 | 3.0  | 18.7 | P | COG0735                 | Fe2+/Zn2+ uptake regulation proteins                                                                                                      |
| Bova3996 CDS CDS              | 5.3  | 1.0  | 17.6 | P | COG4771 COG2304         | Outer membrane receptor for ferrienterochelin and colicins Uncharacterized protein containing a von Willebrand factor type A (vWA) domain |
| Msmi741248 CDS CDS            | 4.2  | 0.8  | 16.8 | P | COG0619                 | ABC-type cobalt transport system, permease component CbiQ and related transporters                                                        |
| Msmi740662 CDS CDS            | 9.3  | 1.8  | 16.7 | P | COG2217                 | Cation transport ATPase                                                                                                                   |
| TS28Met1730 CDS CDS           | 44.3 | 8.8  | 16.7 | P | COG0288                 | Carbonic anhydrase                                                                                                                        |
| Cbol6451 CDS CDS              | 5.0  | 1.0  | 16.5 | P | COG1528                 | Ferritin-like protein                                                                                                                     |
| TS29Rum19985 CDS CDS          | 2.5  | 0.5  | 16.5 | P | COG0600                 | ABC-type nitrate/sulfonate/bicarbonate transport system, permease component                                                               |
| Msmi741246 CDS CDS            | 13.0 | 2.7  | 16.1 | P | COG0310                 | ABC-type Co2+ transport system, permease component                                                                                        |
| TS28Fae06803 CDS CDS          | 14.0 | 3.0  | 15.4 | P | COG0855                 | Polyphosphate kinase                                                                                                                      |
| TS28Bac4742 CDS CDS           | 65.0 | 14.0 | 15.4 | P | COG4771                 | Outer membrane receptor for ferrienterochelin and colicins                                                                                |
| Msmi740386 CDS CDS            | 16.9 | 3.7  | 15.3 | P | COG2116                 | Formate/nitrite family of transporters                                                                                                    |
| Ehal0947 CDS CDS              | 4.5  | 1.0  | 14.9 | P | COG3853                 | Uncharacterized protein involved in tellurite resistance                                                                                  |
| Bste1998 CDS CDS              | 13.5 | 3.0  | 14.9 | P | COG0783                 | DNA-binding ferritin-like protein (oxidative damage protectant)                                                                           |
| Msmi750917 CDS CDS            | 2.3  | 0.5  | 14.9 | P | COG0530                 | Ca2+/Na+ antiporter                                                                                                                       |
| BactD24083 CDS CDS            | 17.6 | 4.0  | 14.6 | P | COG4771 COG2304         | Outer membrane receptor for ferrienterochelin and colicins Uncharacterized protein containing a von Willebrand factor type A (vWA) domain |
| Bova4000 CDS CDS              | 17.6 | 4.0  | 14.6 | P | COG4771 COG2304         | Outer membrane receptor for ferrienterochelin and colicins Uncharacterized protein containing a von Willebrand factor type A (vWA) domain |
| Bbre0868 CDS CDS              | 4.3  | 1.0  | 14.3 | P | COG0306                 | Phosphate/sulphate permeases                                                                                                              |
| PRABACTJOHN1943 CDS CDS       | 8.5  | 2.0  | 14.1 | P | COG0605                 | Superoxide dismutase                                                                                                                      |
| Bova3101 CDS CDS              | 47.3 | 11.2 | 14.0 | P | COG4771                 | Outer membrane receptor for ferrienterochelin and colicins                                                                                |
| Bdor1761 CDS CDS              | 9.3  | 2.3  | 13.2 | P | COG3119                 | Arylsulfatase A and related enzymes                                                                                                       |
| BVU1159 CDS sulfatase         | 9.3  | 2.3  | 13.2 | P | COG3119                 | Arylsulfatase A and related enzymes                                                                                                       |
| TS29Bac03441 CDS CDS          | 2.0  | 0.5  | 13.2 | P | COG4771                 | Outer membrane receptor for ferrienterochelin and colicins                                                                                |
| Bxy10175 CDS CDS              | 4.0  | 1.0  | 13.2 | P | COG3004                 | Na+/H+ antiporter                                                                                                                         |
| TS28Met1345 CDS CDS           | 8.0  | 2.0  | 13.2 | P | COG2217                 | Cation transport ATPase                                                                                                                   |
| TS29Bac01872 CDS CDS          | 2.7  | 0.7  | 13.2 | P | COG0370 COG1918         | Fe2+ transport system protein B Fe2+ transport system protein A                                                                           |
| BVU3788 CDS cholone-sulfatase | 5.8  | 1.5  | 12.9 | P | COG3119                 | Arylsulfatase A and related enzymes                                                                                                       |
| TS28RumUnc1292 CDS CDS        | 19.0 | 5.0  | 12.6 | P | COG2239                 | Mg/Co/Ni transporter MgtE (contains CBS domain)                                                                                           |
| Bste2173 CDS CDS              | 35.5 | 9.5  | 12.4 | P | COG4771                 | Outer membrane receptor for ferrienterochelin and colicins                                                                                |
| Msmi751291 CDS CDS            | 20.5 | 5.8  | 11.6 | P | COG2116                 | Formate/nitrite family of transporters                                                                                                    |
| TS28Met1184 CDS CDS           | 20.5 | 5.8  | 11.6 | P | COG2116                 | Formate/nitrite family of transporters                                                                                                    |
| TS29Rum18984 CDS CDS          | 14.0 | 4.0  | 11.6 | P | COG3853                 | Uncharacterized protein involved in tellurite resistance                                                                                  |
| Bste0051 CDS CDS              | 3.5  | 1.0  | 11.6 | P | COG1629                 | Outer membrane receptor proteins, mostly Fe transport                                                                                     |
| HPAG10858 CDS catalase        | 7.0  | 2.0  | 11.6 | P | COG0753                 | Catalase                                                                                                                                  |
| TS29Bac10370 CDS CDS          | 26.0 | 7.5  | 11.5 | P | COG4771                 | Outer membrane receptor for ferrienterochelin and colicins                                                                                |
| Bdor1762 CDS CDS              | 26.5 | 7.8  | 11.2 | P | COG3119                 | Arylsulfatase A and related enzymes                                                                                                       |
| TS28Par0863 CDS CDS           | 40.0 | 12.0 | 11.0 | P | COG4771                 | Outer membrane receptor for ferrienterochelin and colicins                                                                                |
| Pmer2906 CDS CDS              | 5.0  | 1.5  | 11.0 | P | COG1629                 | Outer membrane receptor proteins, mostly Fe transport                                                                                     |
| FpraM2120733 CDS CDS          | 5.0  | 1.5  | 11.0 | P | COG0581 COG0573         | ABC-type phosphate transport system, permease component ABC-type phosphate transport system, permease component                           |
| TS29Bac11284 CDS CDS          | 9.4  | 3.0  | 10.4 | P | COG4771 COG2304         | Outer membrane receptor for ferrienterochelin and colicins Uncharacterized protein containing a von Willebrand factor type A (vWA) domain |
| TS28Bac3900 CDS CDS           | 22.0 | 7.0  | 10.4 | P | COG2382 COG0627         | Enterochelin esterase and related enzymes Predicted esterase                                                                              |
| TS28Ali1512 CDS CDS           | 56.0 | 18.0 | 10.3 | P | COG0614                 | ABC-type Fe3+-hydroxamate transport system, periplasmic component                                                                         |
| TS28Bac3290 CDS CDS           | 0.5  | 17.0 | 0.1  | P | COG3119                 | Arylsulfatase A and related enzymes                                                                                                       |
| Dfor0464 CDS CDS              | 1.3  | 46.0 | 0.1  | P | COG2217                 | Cation transport ATPase                                                                                                                   |
| TS28Bac7182 CDS CDS           | 0.3  | 11.5 | 0.1  | P | COG2193 COG2406         | Bacterioferritin (cytochrome b1) Protein distantly related to bacterial ferritins                                                         |
| Bdor1151 CDS CDS              | 0.5  | 17.5 | 0.1  | P | COG4771                 | Outer membrane receptor for ferrienterochelin and colicins                                                                                |
| TS28Fae22200 CDS CDS          | 0.5  | 17.5 | 0.1  | P | COG3853                 | Uncharacterized protein involved in tellurite resistance                                                                                  |
| TS29Fae01503 CDS CDS          | 0.5  | 18.0 | 0.1  | P | COG3853                 | Uncharacterized protein involved in tellurite resistance                                                                                  |
| CspS22626 CDS CDS             | 0.5  | 18.0 | 0.1  | P | COG2217                 | Cation transport ATPase                                                                                                                   |
| TS28Eub6792 CDS CDS           | 1.5  | 56.0 | 0.1  | P | COG0619 COG1122         | ABC-type cobalt transport system, permease component CbiQ and related transporters ABC-type cobalt transport system, ATPase component     |
| Buni2918 CDS CDS              | 0.5  | 19.5 | 0.1  | P | COG4771                 | Outer membrane receptor for ferrienterochelin and colicins                                                                                |
| TS28Col1623 CDS CDS           | 1.0  | 39.0 | 0.1  | P | COG1283                 | Na+/phosphate symporter                                                                                                                   |
| TS28Clo01553 CDS CDS          | 1.0  | 39.0 | 0.1  | P | COG1116 COG4525         | ABC-type nitrate/sulfonate/bicarbonate transport system, ATPase component ABC-type taurine transport system, ATPase component             |
| TS28Bac7031 CDS CDS           | 2.0  | 79.0 | 0.1  | P | COG4771                 | Outer membrane receptor for ferrienterochelin and colicins                                                                                |
| TS28Fae20847 CDS CDS          | 1.0  | 41.0 | 0.1  | P | COG2059                 | Chromate transport protein ChrA                                                                                                           |
| TS28Bac5935 CDS CDS           | 2.0  | 83.0 | 0.1  | P | COG4771                 | Outer membrane receptor for ferrienterochelin and colicins                                                                                |
| TS28Fae10820 CDS CDS          | 1.0  | 41.7 | 0.1  | P | COG0471                 | Di- and tricarboxylate transporters                                                                                                       |
| TS28Met1630 CDS CDS           | 0.8  | 31.6 | 0.1  | P | COG0370 COG1918         | Fe2+ transport system protein B Fe2+ transport system protein A                                                                           |
| TS29Bac02568 CDS CDS          | 0.2  | 8.5  | 0.1  | P | COG4771                 | Outer membrane receptor for ferrienterochelin and colicins                                                                                |
| TS29Rum14164 CDS CDS          | 1.0  | 42.5 | 0.1  | P | COG0471                 | Di- and tricarboxylate transporters                                                                                                       |
| TS28Fae16665 CDS CDS          | 0.6  | 25.0 | 0.1  | P | COG1135                 | ABC-type metal ion transport system, ATPase component                                                                                     |
| TS29Bac02235 CDS CDS          | 0.3  | 14.4 | 0.1  | P | COG4771                 | Outer membrane receptor for ferrienterochelin and colicins                                                                                |
| Dlon1970 CDS CDS              | 0.5  | 22.0 | 0.1  | P | COG0370 COG1918         | Fe2+ transport system protein B Fe2+ transport system protein A                                                                           |
| TS28Fae08974 CDS CDS          | 1.3  | 56.0 | 0.1  | P | COG1253 COG4536 COG4535 | Hemolysins and related proteins containing CBS domains Putative Mg2+ and Co2+ transporter CorB Putative Mg2+ and Co2+ transporter CorC    |
| TS28Rum12972 CDS CDS          | 0.5  | 22.5 | 0.1  | P | COG0370 COG1918         | Fe2+ transport system protein B Fe2+ transport system protein A                                                                           |
| TS28Dor3136 CDS CDS           | 0.5  | 22.5 | 0.1  | P | COG0370 COG1918         | Fe2+ transport system protein B Fe2+ transport system protein A                                                                           |
| Pmer0173 CDS CDS              | 0.5  | 23.0 | 0.1  | P | COG4771                 | Outer membrane receptor for ferrienterochelin and colicins                                                                                |
| TS28Fae12094 CDS CDS          | 0.6  | 27.0 | 0.1  | P | COG1135                 | ABC-type metal ion transport system, ATPase component                                                                                     |

|                      |      |       |      |         |                                                                         |                                                                                                                                                                                                                                                                                                                                                                                                                                                                                                                                                                                                      |
|----------------------|------|-------|------|---------|-------------------------------------------------------------------------|------------------------------------------------------------------------------------------------------------------------------------------------------------------------------------------------------------------------------------------------------------------------------------------------------------------------------------------------------------------------------------------------------------------------------------------------------------------------------------------------------------------------------------------------------------------------------------------------------|
| TS28Fae17447 CDS CDS | 1.0  | 47.0  | 0.1  | P       | COG2217                                                                 | Cation transport ATPase                                                                                                                                                                                                                                                                                                                                                                                                                                                                                                                                                                              |
| TS28Fae19575 CDS CDS | 1.0  | 49.0  | 0.1  | P       | COG0855                                                                 | Polyphosphate kinase                                                                                                                                                                                                                                                                                                                                                                                                                                                                                                                                                                                 |
| Rlac0825 CDS CDS     | 1.3  | 67.3  | 0.1  | P       | COG2217                                                                 | Cation transport ATPase                                                                                                                                                                                                                                                                                                                                                                                                                                                                                                                                                                              |
| TS28Fae09808 CDS CDS | 0.4  | 19.0  | 0.1  | P       | COG0855                                                                 | Polyphosphate kinase                                                                                                                                                                                                                                                                                                                                                                                                                                                                                                                                                                                 |
| FpraM2121804 CDS CDS | 0.3  | 12.8  | 0.1  | P       | COG1253 COG4536 COG4535                                                 | Hemolysins and related proteins containing CBS domains Putative Mg <sup>2+</sup> and Co <sup>2+</sup> transporter CorB Putative Mg <sup>2+</sup> and Co <sup>2+</sup> transporter CorC                                                                                                                                                                                                                                                                                                                                                                                                               |
| TS28Eub3915 CDS CDS  | 1.0  | 52.3  | 0.1  | P       | COG0581 COG0573                                                         | ABC-type phosphate transport system, permease component ABC-type phosphate transport system, permease component                                                                                                                                                                                                                                                                                                                                                                                                                                                                                      |
| TS29Rum21104 CDS CDS | 1.0  | 53.0  | 0.1  | P       | COG3853                                                                 | Uncharacterized protein involved in tellurite resistance                                                                                                                                                                                                                                                                                                                                                                                                                                                                                                                                             |
| TS28Eub6790 CDS CDS  | 1.0  | 53.0  | 0.1  | P       | COG1122                                                                 | ABC-type cobalt transport system, ATPase component                                                                                                                                                                                                                                                                                                                                                                                                                                                                                                                                                   |
| TS28Bac6265 CDS CDS  | 0.5  | 27.0  | 0.1  | P       | COG4771                                                                 | Outer membrane receptor for ferrienterochelin and colicins                                                                                                                                                                                                                                                                                                                                                                                                                                                                                                                                           |
| TS28Fae13172 CDS CDS | 0.5  | 29.0  | 0.1  | P       | COG0475                                                                 | Kef-type K <sup>+</sup> transport systems, membrane components                                                                                                                                                                                                                                                                                                                                                                                                                                                                                                                                       |
| TS28Rum14589 CDS CDS | 0.5  | 31.0  | 0.1  | P       | COG0569                                                                 | K <sup>+</sup> transport systems, NAD-binding component                                                                                                                                                                                                                                                                                                                                                                                                                                                                                                                                              |
| TS28Fae18320 CDS CDS | 0.3  | 15.8  | 0.1  | P       | COG1253 COG4536 COG4535                                                 | Hemolysins and related proteins containing CBS domains Putative Mg <sup>2+</sup> and Co <sup>2+</sup> transporter CorB Putative Mg <sup>2+</sup> and Co <sup>2+</sup> transporter CorC                                                                                                                                                                                                                                                                                                                                                                                                               |
| TS29Bif3314 CDS CDS  | 0.3  | 16.4  | 0.1  | P       | COG0474                                                                 | Cation transport ATPase                                                                                                                                                                                                                                                                                                                                                                                                                                                                                                                                                                              |
| TS28Eub6616 CDS CDS  | 1.5  | 99.0  | 0.1  | P       | COG0370 COG1918                                                         | Fe <sup>2+</sup> transport system protein B Fe <sup>2+</sup> transport system protein A                                                                                                                                                                                                                                                                                                                                                                                                                                                                                                              |
| Bdor1140 CDS CDS     | 0.3  | 22.0  | 0.1  | P       | COG4771                                                                 | Outer membrane receptor for ferrienterochelin and colicins                                                                                                                                                                                                                                                                                                                                                                                                                                                                                                                                           |
| TS28Bac6503 CDS CDS  | 1.0  | 67.0  | 0.0  | P       | COG4771                                                                 | Outer membrane receptor for ferrienterochelin and colicins                                                                                                                                                                                                                                                                                                                                                                                                                                                                                                                                           |
| TS28Fae02501 CDS CDS | 1.0  | 68.0  | 0.0  | P       | COG0370 COG1918                                                         | Fe <sup>2+</sup> transport system protein B Fe <sup>2+</sup> transport system protein A                                                                                                                                                                                                                                                                                                                                                                                                                                                                                                              |
| TS28Fae22782 CDS CDS | 0.5  | 34.5  | 0.0  | P       | COG2217                                                                 | Cation transport ATPase                                                                                                                                                                                                                                                                                                                                                                                                                                                                                                                                                                              |
| CspSS21658 CDS CDS   | 1.3  | 96.5  | 0.0  | P       | COG2217                                                                 | Cation transport ATPase                                                                                                                                                                                                                                                                                                                                                                                                                                                                                                                                                                              |
| TS28Eub8823 CDS CDS  | 1.5  | 120.5 | 0.0  | P       | COG2217                                                                 | Cation transport ATPase                                                                                                                                                                                                                                                                                                                                                                                                                                                                                                                                                                              |
| TS28Fae01193 CDS CDS | 0.3  | 27.0  | 0.0  | P       | COG2239                                                                 | Mg/Co/Ni transporter MgtE (contains CBS domain)                                                                                                                                                                                                                                                                                                                                                                                                                                                                                                                                                      |
| TS28Bac5338 CDS CDS  | 0.3  | 28.0  | 0.0  | P       | COG0475 COG1226 COG4651                                                 | Kef-type K <sup>+</sup> transport systems, membrane components Kef-type K <sup>+</sup> transport systems, predicted NAD-binding component Kef-type K <sup>+</sup> transport system, predicted NAD-binding component                                                                                                                                                                                                                                                                                                                                                                                  |
| TS28Bif4716 CDS CDS  | 0.3  | 22.4  | 0.0  | P       | COG0474                                                                 | Cation transport ATPase                                                                                                                                                                                                                                                                                                                                                                                                                                                                                                                                                                              |
| TS28Eub8292 CDS CDS  | 1.0  | 106.5 | 0.0  | P       | COG0855                                                                 | Polyphosphate kinase                                                                                                                                                                                                                                                                                                                                                                                                                                                                                                                                                                                 |
| TS28Fae22049 CDS CDS | 0.5  | 73.0  | 0.0  | P       | COG0569                                                                 | K <sup>+</sup> transport systems, NAD-binding component                                                                                                                                                                                                                                                                                                                                                                                                                                                                                                                                              |
| TS28Bac0741 CDS CDS  | 0.5  | 76.5  | 0.0  | P       | COG4771                                                                 | Outer membrane receptor for ferrienterochelin and colicins                                                                                                                                                                                                                                                                                                                                                                                                                                                                                                                                           |
| TS28Fae20104 CDS CDS | 0.4  | 70.0  | 0.0  | P       | COG0855                                                                 | Polyphosphate kinase                                                                                                                                                                                                                                                                                                                                                                                                                                                                                                                                                                                 |
| RintL12242 CDS CDS   | 4.0  | 1.0   | 13.2 | P D     | COG1135 COG2884 COG2177                                                 | ABC-type metal ion transport system, ATPase component Predicted ATPase involved in cell division Cell division protein                                                                                                                                                                                                                                                                                                                                                                                                                                                                               |
| TS28Clo01379 CDS CDS | 1.0  | 128.0 | 0.0  | P D     | COG2884 COG2177 COG1135                                                 | Predicted ATPase involved in cell division Cell division protein ABC-type metal ion transport system, ATPase component                                                                                                                                                                                                                                                                                                                                                                                                                                                                               |
| Casp5378 CDS CDS     | 6.0  | 1.0   | 19.8 | P E     | COG0444 COG1123                                                         | ABC-type dipeptide/oligopeptide/nickel transport system, ATPase component ATPase components of various ABC-type transport systems, contain duplicated ATPase                                                                                                                                                                                                                                                                                                                                                                                                                                         |
| Bryfor1877 CDS CDS   | 4.0  | 1.0   | 13.2 | P E     | COG0601                                                                 | ABC-type dipeptide/oligopeptide/nickel transport systems, permease components                                                                                                                                                                                                                                                                                                                                                                                                                                                                                                                        |
| Rumhyd2304 CDS CDS   | 3.0  | 0.5   | 19.8 | P E F   | COG0503 COG0601                                                         | Adenine/guanine phosphoribosyltransferases and related PRPP-binding proteins ABC-type dipeptide/oligopeptide/nickel transport systems, permease components                                                                                                                                                                                                                                                                                                                                                                                                                                           |
| Csp3530 CDS CDS      | 2.3  | 0.1   | 92.3 | P E G   | COG0477                                                                 | Permeases of the major facilitator superfamily                                                                                                                                                                                                                                                                                                                                                                                                                                                                                                                                                       |
| Ecan0984 CDS CDS     | 2.3  | 0.1   | 92.3 | P E G   | COG0477                                                                 | Permeases of the major facilitator superfamily                                                                                                                                                                                                                                                                                                                                                                                                                                                                                                                                                       |
| DpigATC0313 CDS CDS  | 2.3  | 0.1   | 92.3 | P E G   | COG0477                                                                 | Permeases of the major facilitator superfamily                                                                                                                                                                                                                                                                                                                                                                                                                                                                                                                                                       |
| Ppen0002 CDS CDS     | 2.3  | 0.1   | 92.3 | P E G   | COG0477                                                                 | Permeases of the major facilitator superfamily                                                                                                                                                                                                                                                                                                                                                                                                                                                                                                                                                       |
| CspM6211669 CDS CDS  | 2.3  | 0.1   | 92.3 | P E G   | COG0477                                                                 | Permeases of the major facilitator superfamily                                                                                                                                                                                                                                                                                                                                                                                                                                                                                                                                                       |
| Cnex0444 CDS CDS     | 2.3  | 0.1   | 92.3 | P E G   | COG0477                                                                 | Permeases of the major facilitator superfamily                                                                                                                                                                                                                                                                                                                                                                                                                                                                                                                                                       |
| Bege3358 CDS CDS     | 1.8  | 0.1   | 70.3 | P E G   | COG0477                                                                 | Permeases of the major facilitator superfamily                                                                                                                                                                                                                                                                                                                                                                                                                                                                                                                                                       |
| ShigspD91992 CDS CDS | 14.5 | 1.0   | 48.0 | P E G   | COG0477                                                                 | Permeases of the major facilitator superfamily                                                                                                                                                                                                                                                                                                                                                                                                                                                                                                                                                       |
| Prus2866 CDS CDS     | 1.1  | 0.1   | 44.7 | P E G   | COG0477                                                                 | Permeases of the major facilitator superfamily                                                                                                                                                                                                                                                                                                                                                                                                                                                                                                                                                       |
| Msmi751681 CDS CDS   | 1.1  | 0.1   | 44.7 | P E G   | COG0477                                                                 | Permeases of the major facilitator superfamily                                                                                                                                                                                                                                                                                                                                                                                                                                                                                                                                                       |
| Bcae0408 CDS CDS     | 11.0 | 1.0   | 36.4 | P E G   | COG0477                                                                 | Permeases of the major facilitator superfamily                                                                                                                                                                                                                                                                                                                                                                                                                                                                                                                                                       |
| Msmi740185 CDS CDS   | 0.3  | 0.1   | 12.2 | P E G   | COG0477                                                                 | Permeases of the major facilitator superfamily                                                                                                                                                                                                                                                                                                                                                                                                                                                                                                                                                       |
| Bova1303 CDS CDS     | 1.8  | 0.5   | 12.1 | P E G   | COG0477                                                                 | Permeases of the major facilitator superfamily                                                                                                                                                                                                                                                                                                                                                                                                                                                                                                                                                       |
| Cste0061 CDS CDS     | 3.5  | 1.0   | 11.6 | P E G   | COG0477                                                                 | Permeases of the major facilitator superfamily                                                                                                                                                                                                                                                                                                                                                                                                                                                                                                                                                       |
| Bdor0617 CDS CDS     | 17.5 | 5.0   | 11.6 | P E G   | COG0477 COG2271 COG2814                                                 | Permeases of the major facilitator superfamily Sugar phosphate permease Arabinose efflux permease                                                                                                                                                                                                                                                                                                                                                                                                                                                                                                    |
| Bste2908 CDS CDS     | 10.0 | 3.0   | 11.0 | P E G   | COG0477                                                                 | Permeases of the major facilitator superfamily                                                                                                                                                                                                                                                                                                                                                                                                                                                                                                                                                       |
| Bdor0274 CDS CDS     | 9.7  | 3.0   | 10.7 | P E G   | COG0477                                                                 | Permeases of the major facilitator superfamily                                                                                                                                                                                                                                                                                                                                                                                                                                                                                                                                                       |
| Msmi740824 CDS CDS   | 7.9  | 1.0   | 26.2 | P E G V | COG1131 COG3842 COG3839 COG1126 COG1125 COG1123 COG4172 COG1135 COG4175 | ABC-type multidrug transport system, ATPase component ABC-type spermidine/putrescine transport systems, ATPase components ABC-type sugar transport systems, ATPase components ABC-type polar amino acid transport system, ATPase component ABC-type proline/glycine betaine transport systems, ATPase components ATPase components of various ABC-type transport systems, contain duplicated ATPase ABC-type uncharacterized transport system, duplicated ATPase component ABC-type metal ion transport system, ATPase component ABC-type proline/glycine betaine transport system, ATPase component |
| Cspi0889 CDS CDS     | 14.0 | 1.0   | 46.3 | P E V Q | COG1136 COG4181 COG1126 COG1135 COG4598                                 | ABC-type antimicrobial peptide transport system, ATPase component Predicted ABC-type transport system involved in lysophospholipase L1 biosynthesis, ATPase component ABC-type polar amino acid transport system, ATPase component ABC-type metal ion transport system, ATPase component ABC-type histidine transport system, ATPase component                                                                                                                                                                                                                                                       |
| ShigspD90220 CDS CDS | 5.5  | 1.0   | 18.2 | P F     | COG0248                                                                 | Exopolyphosphatase                                                                                                                                                                                                                                                                                                                                                                                                                                                                                                                                                                                   |
| Bcap2857 CDS CDS     | 6.5  | 0.5   | 43.0 | P G     | COG1629 COG1312                                                         | Outer membrane receptor proteins, mostly Fe transport D-mannanate dehydratase                                                                                                                                                                                                                                                                                                                                                                                                                                                                                                                        |

|                        |       |       |       |         |                                                                                         |                                                                                                                                                                                                                                                                                                                                                                                                                                                                                                                             |
|------------------------|-------|-------|-------|---------|-----------------------------------------------------------------------------------------|-----------------------------------------------------------------------------------------------------------------------------------------------------------------------------------------------------------------------------------------------------------------------------------------------------------------------------------------------------------------------------------------------------------------------------------------------------------------------------------------------------------------------------|
| Bdor0021 CDS CDS       | 11.7  | 1.0   | 38.6  | P G     | COG1218 COG0483                                                                         | 3'-Phosphoadenosine 5'-phosphosulfate (PAPS) 3'-phosphatase Archaeal fructose-1,6-bisphosphatase and related enzymes of inositol monophosphatase family                                                                                                                                                                                                                                                                                                                                                                     |
| Bova1281 CDS CDS       | 5.0   | 0.5   | 33.1  | P G     | COG1218 COG0483                                                                         | 3'-Phosphoadenosine 5'-phosphosulfate (PAPS) 3'-phosphatase Archaeal fructose-1,6-bisphosphatase and related enzymes of inositol monophosphatase family                                                                                                                                                                                                                                                                                                                                                                     |
| Bcap3562 CDS CDS       | 7.5   | 1.5   | 16.5  | P G     | COG1629 COG1312                                                                         | Outer membrane receptor proteins, mostly Fe transport D-mannonate dehydratase                                                                                                                                                                                                                                                                                                                                                                                                                                               |
| Casp1491 CDS CDS       | 9.0   | 1.0   | 29.8  | P H     | COG0607 COG0301                                                                         | Rhodanese-related sulfurtransferase Thiamine biosynthesis ATP pyrophosphatase                                                                                                                                                                                                                                                                                                                                                                                                                                               |
| Msmi741249 CDS CDS     | 3.4   | 0.5   | 22.2  | P H     | COG1122 COG1903                                                                         | ABC-type cobalt transport system, ATPase component Cobalamin biosynthesis protein CbiD                                                                                                                                                                                                                                                                                                                                                                                                                                      |
| Msmi751307 CDS CDS     | 2.9   | 0.5   | 18.8  | P H     | COG0476 COG0607                                                                         | Dinucleotide-utilizing enzymes involved in molybdopterin and thiamine biosynthesis family 2 Rhodanese-related sulfurtransferase                                                                                                                                                                                                                                                                                                                                                                                             |
| TS29Rum21018 CDS CDS   | 10.0  | 3.0   | 11.0  | P H     | COG1179 COG0607 COG0476                                                                 | Dinucleotide-utilizing enzymes involved in molybdopterin and thiamine biosynthesis family 1 Rhodanese-related sulfurtransferase Dinucleotide-utilizing enzymes involved in molybdopterin and thiamine biosynthesis family 2                                                                                                                                                                                                                                                                                                 |
| TS28Rum12300 CDS CDS   | 0.5   | 18.5  | 0.1   | P H     | COG0607 COG0301                                                                         | Rhodanese-related sulfurtransferase Thiamine biosynthesis ATP pyrophosphatase                                                                                                                                                                                                                                                                                                                                                                                                                                               |
| TS28Ali0168 CDS CDS    | 1.0   | 39.0  | 0.1   | P H     | COG4771 COG4206                                                                         | Outer membrane receptor for ferrienterochelin and colicins Outer membrane cobalamin receptor protein                                                                                                                                                                                                                                                                                                                                                                                                                        |
| TS28Fae01187 CDS CDS   | 0.7   | 27.0  | 0.1   | P H     | COG0607 COG0301                                                                         | Rhodanese-related sulfurtransferase Thiamine biosynthesis ATP pyrophosphatase                                                                                                                                                                                                                                                                                                                                                                                                                                               |
| TS28Rum02826 CDS CDS   | 0.5   | 21.5  | 0.1   | P H     | COG1120 COG4604 COG1865                                                                 | ABC-type cobalamin/Fe3+-siderophore transport systems, ATPase components ABC-type enterochelin transport system, ATPase component Uncharacterized conserved protein                                                                                                                                                                                                                                                                                                                                                         |
| TS28Fae14580 CDS CDS   | 13.0  | 3.0   | 14.3  | P I     | COG0657 COG2072                                                                         | Esterase/lipase Predicted flavoprotein involved in K+ transport                                                                                                                                                                                                                                                                                                                                                                                                                                                             |
| TS29RumUnc0659 CDS CDS | 4.0   | 1.0   | 13.2  | P J     | COG0566 COG0474                                                                         | rRNA methylases Cation transport ATPase                                                                                                                                                                                                                                                                                                                                                                                                                                                                                     |
| TS28Rum16435 CDS CDS   | 1.0   | 55.5  | 0.1   | P J     | COG0566 COG0474                                                                         | rRNA methylases Cation transport ATPase                                                                                                                                                                                                                                                                                                                                                                                                                                                                                     |
| TS29Fae05416 CDS CDS   | 4.5   | 1.0   | 14.9  | P K     | COG1918 COG1321                                                                         | Fe2+ transport system protein A Mn-dependent transcriptional regulator                                                                                                                                                                                                                                                                                                                                                                                                                                                      |
| TS29Fae05143 CDS CDS   | 15.3  | 0.5   | 101.4 | P M     | COG0226 COG2885                                                                         | ABC-type phosphate transport system, periplasmic component Outer membrane protein and related peptidoglycan-associated (lipo)proteins                                                                                                                                                                                                                                                                                                                                                                                       |
| FpraM2120301 CDS CDS   | 7.3   | 1.5   | 16.2  | P M     | COG0226 COG2885                                                                         | ABC-type phosphate transport system, periplasmic component Outer membrane protein and related peptidoglycan-associated (lipo)proteins                                                                                                                                                                                                                                                                                                                                                                                       |
| Bthe3734413 CDS CDS    | 1.5   | 0.3   | 14.9  | P M     | COG3015                                                                                 | Uncharacterized lipoprotein NlpE involved in copper resistance                                                                                                                                                                                                                                                                                                                                                                                                                                                              |
| Bthe7331626 CDS CDS    | 1.5   | 0.3   | 14.9  | P M     | COG3015                                                                                 | Uncharacterized lipoprotein NlpE involved in copper resistance                                                                                                                                                                                                                                                                                                                                                                                                                                                              |
| TS29Bac08855 CDS CDS   | 1.5   | 0.3   | 14.9  | P M     | COG3015                                                                                 | Uncharacterized lipoprotein NlpE involved in copper resistance                                                                                                                                                                                                                                                                                                                                                                                                                                                              |
| TS28Fae12475 CDS CDS   | 0.5   | 32.0  | 0.1   | P M     | COG0226 COG2885                                                                         | ABC-type phosphate transport system, periplasmic component Outer membrane protein and related peptidoglycan-associated (lipo)proteins                                                                                                                                                                                                                                                                                                                                                                                       |
| Pmer2305 CDS CDS       | 584.8 | 6.0   | 322.3 | P T     | COG3712                                                                                 | Fe2+-dicitrate sensor, membrane component                                                                                                                                                                                                                                                                                                                                                                                                                                                                                   |
| Bxyl0582 CDS CDS       | 15.0  | 1.0   | 49.6  | P T     | COG3712                                                                                 | Fe2+-dicitrate sensor, membrane component                                                                                                                                                                                                                                                                                                                                                                                                                                                                                   |
| BactD13695 CDS CDS     | 10.2  | 1.0   | 33.6  | P T     | COG3712                                                                                 | Fe2+-dicitrate sensor, membrane component                                                                                                                                                                                                                                                                                                                                                                                                                                                                                   |
| Pmer2795 CDS CDS       | 21.0  | 3.0   | 23.1  | P T     | COG3712                                                                                 | Fe2+-dicitrate sensor, membrane component                                                                                                                                                                                                                                                                                                                                                                                                                                                                                   |
| TS29Bac05028 CDS CDS   | 10.2  | 1.5   | 22.4  | P T     | COG3712                                                                                 | Fe2+-dicitrate sensor, membrane component                                                                                                                                                                                                                                                                                                                                                                                                                                                                                   |
| Bdor2902 CDS CDS       | 3.3   | 0.7   | 16.5  | P T     | COG3712                                                                                 | Fe2+-dicitrate sensor, membrane component                                                                                                                                                                                                                                                                                                                                                                                                                                                                                   |
| Bxyl3703 CDS CDS       | 2.5   | 0.5   | 16.5  | P T     | COG3712                                                                                 | Fe2+-dicitrate sensor, membrane component                                                                                                                                                                                                                                                                                                                                                                                                                                                                                   |
| TS29Bac07248 CDS CDS   | 2.5   | 0.5   | 16.5  | P T     | COG3712                                                                                 | Fe2+-dicitrate sensor, membrane component                                                                                                                                                                                                                                                                                                                                                                                                                                                                                   |
| Bste3074 CDS CDS       | 5.0   | 1.0   | 16.5  | P T     | COG0517 COG0589 COG0038                                                                 | FOG: CBS domain Universal stress protein UspA and related nucleotide-binding proteins Chloride channel protein Eric                                                                                                                                                                                                                                                                                                                                                                                                         |
| Bdor1758 CDS CDS       | 20.2  | 4.8   | 13.8  | P T     | COG3712                                                                                 | Fe2+-dicitrate sensor, membrane component                                                                                                                                                                                                                                                                                                                                                                                                                                                                                   |
| Pmer0905 CDS CDS       | 3.2   | 0.8   | 12.6  | P T     | COG3712                                                                                 | Fe2+-dicitrate sensor, membrane component                                                                                                                                                                                                                                                                                                                                                                                                                                                                                   |
| Bova2503 CDS CDS       | 5.2   | 1.5   | 11.4  | P T     | COG3712                                                                                 | Fe2+-dicitrate sensor, membrane component                                                                                                                                                                                                                                                                                                                                                                                                                                                                                   |
| Bdor2708 CDS CDS       | 19.0  | 6.0   | 10.5  | P T     | COG3712                                                                                 | Fe2+-dicitrate sensor, membrane component                                                                                                                                                                                                                                                                                                                                                                                                                                                                                   |
| Pmer2876 CDS CDS       | 13.0  | 3.0   | 14.3  | P T E K | COG0642 COG2202 COG0784 COG0834 COG2203 COG3437 COG3300 COG3706 COG4191 COG3899 COG2703 | Signal transduction histidine kinase FOG: PAS/PAC domain FOG: CheY-like receiver ABC-type amino acid transport/signal transduction systems, periplasmic component/domain FOG: GAF domain Response regulator containing a CheY-like receiver domain and an HD-GYP domain MHTY domain (predicted integral membrane sensor domain) Response regulator containing a CheY-like receiver domain and a GGDEF domain Signal transduction histidine kinase regulating C4-dicarboxylate transport system Predicted ATPase Hemerythrin |
| Csvm0350 CDS CDS       | 4.0   | 1.0   | 13.2  | P V     | COG0841 COG3696                                                                         | Cation/multidrug efflux pump Putative silver efflux pump                                                                                                                                                                                                                                                                                                                                                                                                                                                                    |
| TS28Col0898 CDS CDS    | 2.0   | 68.0  | 0.1   | P V     | COG0841 COG3696                                                                         | Cation/multidrug efflux pump Putative silver efflux pump                                                                                                                                                                                                                                                                                                                                                                                                                                                                    |
| TS28Bac7939 CDS CDS    | 1.0   | 44.5  | 0.1   | P V     | COG0841 COG3696                                                                         | Cation/multidrug efflux pump Putative silver efflux pump                                                                                                                                                                                                                                                                                                                                                                                                                                                                    |
| TS28Rum04557 CDS CDS   | 5.0   | 0.5   | 33.1  | Q       | COG0500                                                                                 | SAM-dependent methyltransferases                                                                                                                                                                                                                                                                                                                                                                                                                                                                                            |
| TS28Rum14910 CDS CDS   | 5.0   | 0.5   | 33.1  | Q       | COG0500                                                                                 | SAM-dependent methyltransferases                                                                                                                                                                                                                                                                                                                                                                                                                                                                                            |
| ShigspD91724 CDS CDS   | 7.0   | 1.0   | 23.1  | Q       | COG2132                                                                                 | Putative multicopper oxidases                                                                                                                                                                                                                                                                                                                                                                                                                                                                                               |
| ShigspD91231 CDS CDS   | 6.0   | 1.0   | 19.8  | Q       | COG2015                                                                                 | Alkyl sulfatase and related hydrolases                                                                                                                                                                                                                                                                                                                                                                                                                                                                                      |
| Robe3274 CDS CDS       | 10.0  | 2.0   | 16.5  | Q       | COG4869                                                                                 | Propanediol utilization protein                                                                                                                                                                                                                                                                                                                                                                                                                                                                                             |
| TS29Bac07694 CDS CDS   | 1.7   | 0.3   | 16.5  | Q       | COG0500                                                                                 | SAM-dependent methyltransferases                                                                                                                                                                                                                                                                                                                                                                                                                                                                                            |
| Cspi1235 CDS CDS       | 4.0   | 1.0   | 13.2  | Q       | COG0561 COG2050                                                                         | Predicted hydrolases of the HAD superfamily Uncharacterized protein, possibly involved in aromatic compounds catabolism                                                                                                                                                                                                                                                                                                                                                                                                     |
| Ehal0409 CDS CDS       | 7.5   | 2.0   | 12.4  | Q       | COG4910                                                                                 | Propanediol dehydratase, small subunit                                                                                                                                                                                                                                                                                                                                                                                                                                                                                      |
| TS28Rum12776 CDS CDS   | 15.0  | 4.0   | 12.4  | Q       | COG2015                                                                                 | Alkyl sulfatase and related hydrolases                                                                                                                                                                                                                                                                                                                                                                                                                                                                                      |
| TS28Rum02928 CDS CDS   | 4.0   | 170.0 | 0.1   | Q       | COG1020 COG3321 COG3319 COG3320                                                         | Non-ribosomal peptide synthetase modules and related proteins Polyketide synthase modules and related proteins Thioesterase domains of type I polyketide synthases or non-ribosomal peptide synthetases Putative dehydrogenase domain of multifunctional non-ribosomal peptide synthetases and related enzymes                                                                                                                                                                                                              |
| TS28Rum00561 CDS CDS   | 0.5   | 22.3  | 0.1   | Q       | COG4909                                                                                 | Propanediol dehydratase, large subunit                                                                                                                                                                                                                                                                                                                                                                                                                                                                                      |
| TS28Rum15555 CDS CDS   | 0.5   | 24.0  | 0.1   | Q       | COG0561 COG2050                                                                         | Predicted hydrolases of the HAD superfamily Uncharacterized protein, possibly involved in aromatic compounds catabolism                                                                                                                                                                                                                                                                                                                                                                                                     |
| TS28Met1416 CDS CDS    | 0.3   | 13.3  | 0.1   | Q       | COG1228                                                                                 | Imidazolonepropionase and related amidohydrolases                                                                                                                                                                                                                                                                                                                                                                                                                                                                           |

|                      |      |       |       |     |                                                                         |                                                                                                                                                                                                                                                                                                                                                                                                                                                         |
|----------------------|------|-------|-------|-----|-------------------------------------------------------------------------|---------------------------------------------------------------------------------------------------------------------------------------------------------------------------------------------------------------------------------------------------------------------------------------------------------------------------------------------------------------------------------------------------------------------------------------------------------|
| TS28Clo01626 CDS CDS | 1.0  | 75.0  | 0.0   | Q   | COG1335                                                                 | Amidases related to nicotinamidase                                                                                                                                                                                                                                                                                                                                                                                                                      |
| TS28Eub8595 CDS CDS  | 1.0  | 172.0 | 0.0   | Q   | COG2931                                                                 | RTX toxins and related Ca <sup>2+</sup> -binding proteins                                                                                                                                                                                                                                                                                                                                                                                               |
| TS29Bif3494 CDS CDS  | 0.3  | 46.5  | 0.0   | Q   | COG2931                                                                 | RTX toxins and related Ca <sup>2+</sup> -binding proteins                                                                                                                                                                                                                                                                                                                                                                                               |
| TS28Eub5422 CDS CDS  | 1.0  | 274.5 | 0.0   | Q   | COG1020 COG3321 COG3319 COG3320                                         | Non-ribosomal peptide synthetase modules and related proteins Polyketide synthase modules and related proteins Thioesterase domains of type I polyketide synthases or non-ribosomal peptide synthetases Putative dehydrogenase domain of multifunctional non-ribosomal peptide synthetases and related enzymes                                                                                                                                          |
| TS28Fae22148 CDS CDS | 1.0  | 41.0  | 0.1   | Q V | COG1136 COG4181                                                         | ABC-type antimicrobial peptide transport system, ATPase component Predicted ABC-type transport system involved in lysophospholipase L1 biosynthesis, ATPase component                                                                                                                                                                                                                                                                                   |
| Even0449 CDS CDS     | 50.7 | 0.5   | 335.1 | T   | COG0642 COG2202 COG5002                                                 | Signal transduction histidine kinase FOG: PAS/PAC domain Signal transduction histidine kinase                                                                                                                                                                                                                                                                                                                                                           |
| Cnex0540 CDS CDS     | 50.7 | 0.5   | 335.1 | T   | COG0642 COG2202 COG5002                                                 | Signal transduction histidine kinase FOG: PAS/PAC domain Signal transduction histidine kinase                                                                                                                                                                                                                                                                                                                                                           |
| Msmi750943 CDS CDS   | 6.8  | 0.3   | 90.2  | T   | COG0517 COG0589 COG0618 COG3448                                         | FOG: CBS domain Universal stress protein UspA and related nucleotide-binding proteins Exopolysphatase-related proteins CBS-domain-containing membrane protein                                                                                                                                                                                                                                                                                           |
| Hfil2372 CDS CDS     | 17.0 | 1.0   | 56.2  | T   | COG2202 COG3300 COG5001 COG2200                                         | FOG: PAS/PAC domain MHYT domain (predicted integral membrane sensor domain) Predicted signal transduction protein containing a membrane domain, an EAL and a GGDEF domain FOG: EAL domain                                                                                                                                                                                                                                                               |
| ShigspD92172 CDS CDS | 7.5  | 0.5   | 49.6  | T   | COG2202 COG3447 COG3300 COG5001 COG2200 COG3614                         | FOG: PAS/PAC domain Predicted integral membrane sensor domain MHYT domain (predicted integral membrane sensor domain) Predicted signal transduction protein containing a membrane domain, an EAL and a GGDEF domain FOG: EAL domain Predicted periplasmic ligand-binding sensor domain                                                                                                                                                                  |
| CspM6212495 CDS CDS  | 14.0 | 1.0   | 46.3  | T   | COG1217                                                                 | Predicted membrane GTPase involved in stress response                                                                                                                                                                                                                                                                                                                                                                                                   |
| TS29Fae00912 CDS CDS | 6.5  | 0.5   | 43.0  | T   | COG0642 COG5002 COG2202                                                 | Signal transduction histidine kinase Signal transduction histidine kinase FOG: PAS/PAC domain                                                                                                                                                                                                                                                                                                                                                           |
| Bdot2976 CDS CDS     | 11.0 | 1.0   | 36.4  | T   | COG0642                                                                 | Signal transduction histidine kinase                                                                                                                                                                                                                                                                                                                                                                                                                    |
| CspL21207 CDS CDS    | 10.6 | 1.0   | 35.2  | T   | COG0642 COG2202 COG5002 COG2203 COG2205                                 | Signal transduction histidine kinase FOG: PAS/PAC domain Signal transduction histidine kinase FOG: GAF domain Osmosensitive K <sup>+</sup> channel histidine kinase                                                                                                                                                                                                                                                                                     |
| RintL10786 CDS CDS   | 3.2  | 0.3   | 31.4  | T   | COG0642 COG2202 COG5002 COG2203 COG3300 COG3322 COG5001 COG4251 COG2205 | Signal transduction histidine kinase FOG: PAS/PAC domain Signal transduction histidine kinase FOG: GAF domain MHYT domain (predicted integral membrane sensor domain) Predicted periplasmic ligand-binding sensor domain Predicted signal transduction protein containing a membrane domain, an EAL and a GGDEF domain Bacteriophytochrome (light-regulated signal transduction histidine kinase) Osmosensitive K <sup>+</sup> channel histidine kinase |
| Pmer2757 CDS CDS     | 14.0 | 1.5   | 30.9  | T   | COG0642 COG2202 COG5002 COG2770 COG3614 COG2205                         | Signal transduction histidine kinase FOG: PAS/PAC domain Signal transduction histidine kinase FOG: HAMP domain Predicted periplasmic ligand-binding sensor domain Osmosensitive K <sup>+</sup> channel histidine kinase                                                                                                                                                                                                                                 |
| Begg1032 CDS CDS     | 4.5  | 0.5   | 29.8  | T   | COG2310 COG4110                                                         | Uncharacterized proteins involved in stress response, homologs of TerZ and putative cAMP-binding protein CABP1 Uncharacterized protein involved in stress response                                                                                                                                                                                                                                                                                      |
| TS29Par943 CDS CDS   | 4.5  | 0.5   | 29.8  | T   | COG2310 COG4110                                                         | Uncharacterized proteins involved in stress response, homologs of TerZ and putative cAMP-binding protein CABP1 Uncharacterized protein involved in stress response                                                                                                                                                                                                                                                                                      |
| BactD13600 CDS CDS   | 4.3  | 0.5   | 28.7  | T   | COG0589                                                                 | Universal stress protein UspA and related nucleotide-binding proteins                                                                                                                                                                                                                                                                                                                                                                                   |
| TS29Bac04334 CDS CDS | 4.3  | 0.5   | 28.7  | T   | COG0589                                                                 | Universal stress protein UspA and related nucleotide-binding proteins                                                                                                                                                                                                                                                                                                                                                                                   |
| Ceut1555 CDS CDS     | 2.0  | 0.3   | 26.5  | T   | COG1217                                                                 | Predicted membrane GTPase involved in stress response                                                                                                                                                                                                                                                                                                                                                                                                   |
| TS29Fae00607 CDS CDS | 4.0  | 0.5   | 26.5  | T   | COG2202 COG5001 COG2200                                                 | FOG: PAS/PAC domain Predicted signal transduction protein containing a membrane domain, an EAL and a GGDEF domain FOG: EAL domain                                                                                                                                                                                                                                                                                                                       |
| ShigspD91720 CDS CDS | 7.5  | 1.0   | 24.8  | T   | COG0642                                                                 | Signal transduction histidine kinase                                                                                                                                                                                                                                                                                                                                                                                                                    |
| TS29Fae06630 CDS CDS | 7.0  | 1.0   | 23.1  | T   | COG2202 COG2203 COG3300 COG5001 COG2200                                 | FOG: PAS/PAC domain FOG: GAF domain MHYT domain (predicted integral membrane sensor domain) Predicted signal transduction protein containing a membrane domain, an EAL and a GGDEF domain FOG: EAL domain                                                                                                                                                                                                                                               |
| TS29Fae04540 CDS CDS | 3.5  | 0.5   | 23.1  | T   | COG1493                                                                 | Serine kinase of the HPr protein, regulates carbohydrate metabolism                                                                                                                                                                                                                                                                                                                                                                                     |
| TS29Bac01158 CDS CDS | 6.5  | 1.0   | 21.5  | T   | COG0618 COG3887                                                         | Exopolysphatase-related proteins Predicted signaling protein consisting of a modified GGDEF domain and a DHH domain                                                                                                                                                                                                                                                                                                                                     |
| TS29Fae03004 CDS CDS | 8.3  | 1.3   | 20.7  | T   | COG2202 COG2770 COG2203 COG3322 COG5001 COG4251 COG2199 COG2200         | FOG: PAS/PAC domain FOG: HAMP domain FOG: GAF domain Predicted periplasmic ligand-binding sensor domain Predicted signal transduction protein containing a membrane domain, an EAL and a GGDEF domain Bacteriophytochrome (light-regulated signal transduction histidine kinase) FOG: GGDEF domain FOG: EAL domain                                                                                                                                      |
| FpraM2122134 CDS CDS | 8.3  | 1.3   | 20.7  | T   | COG2202 COG2203 COG3322 COG5001 COG2199 COG4251 COG2770 COG2200         | FOG: PAS/PAC domain FOG: GAF domain Predicted periplasmic ligand-binding sensor domain Predicted signal transduction protein containing a membrane domain, an EAL and a GGDEF domain FOG: GGDEF domain Bacteriophytochrome (light-regulated signal transduction histidine kinase) FOG: HAMP domain FOG: EAL domain                                                                                                                                      |
| Casp1960 CDS CDS     | 6.0  | 1.0   | 19.8  | T   | COG2202 COG2203 COG5001 COG2199 COG2200                                 | FOG: PAS/PAC domain FOG: GAF domain Predicted signal transduction protein containing a membrane domain, an EAL and a GGDEF domain FOG: GGDEF domain FOG: EAL domain                                                                                                                                                                                                                                                                                     |
| Acol0407 CDS CDS     | 6.0  | 1.0   | 19.8  | T   | COG0642 COG5002                                                         | Signal transduction histidine kinase Signal transduction histidine kinase                                                                                                                                                                                                                                                                                                                                                                               |

|                        |      |       |      |   |                                                                         |                                                                                                                                                                                                                                                                                                                                                                                                                 |
|------------------------|------|-------|------|---|-------------------------------------------------------------------------|-----------------------------------------------------------------------------------------------------------------------------------------------------------------------------------------------------------------------------------------------------------------------------------------------------------------------------------------------------------------------------------------------------------------|
| TS28Bac4675 CDS CDS    | 6.0  | 1.0   | 19.8 | T | COG0642                                                                 | Signal transduction histidine kinase                                                                                                                                                                                                                                                                                                                                                                            |
| TS29Bac01648 CDS CDS   | 6.0  | 1.0   | 19.8 | T | COG0642                                                                 | Signal transduction histidine kinase                                                                                                                                                                                                                                                                                                                                                                            |
| Pmer1943 CDS CDS       | 39.5 | 7.0   | 18.7 | T | COG1875 COG1702                                                         | Predicted ATPase related to phosphate starvation-inducible protein PhoH Phosphate starvation-inducible protein PhoH, predicted ATPase                                                                                                                                                                                                                                                                           |
| ShigspD92677 CDS CDS   | 5.5  | 1.0   | 18.2 | T | COG2766                                                                 | Putative Ser protein kinase                                                                                                                                                                                                                                                                                                                                                                                     |
| RintL11018 CDS CDS     | 5.5  | 1.0   | 18.2 | T | COG2202 COG3300 COG5001 COG2200 COG3614                                 | FOG: PAS/PAC domain MHYT domain (predicted integral membrane sensor domain) Predicted signal transduction protein containing a membrane domain, an EAL and a GGDEF domain FOG: EAL domain Predicted periplasmic ligand-binding sensor domain                                                                                                                                                                    |
| Hfil1937 CDS CDS       | 11.0 | 2.0   | 18.2 | T | COG2202 COG2203 COG3300 COG3706 COG5001 COG2200                         | FOG: PAS/PAC domain FOG: GAF domain MHYT domain (predicted integral membrane sensor domain) Response regulator containing a CheY-like receiver domain and a GGDEF domain Predicted signal transduction protein containing a membrane domain, an EAL and a GGDEF domain FOG: EAL domain                                                                                                                          |
| TS28Rum08086 CDS CDS   | 69.0 | 13.0  | 17.6 | T | COG2972                                                                 | Predicted signal transduction protein with a C-terminal ATPase domain                                                                                                                                                                                                                                                                                                                                           |
| TS29RumUnc1391 CDS CDS | 2.5  | 0.5   | 16.5 | T | COG0642 COG5002 COG2202 COG2770 COG2203                                 | Signal transduction histidine kinase Signal transduction histidine kinase FOG: PAS/PAC domain FOG: HAMP domain FOG: GAF domain                                                                                                                                                                                                                                                                                  |
| Pmer1554 CDS CDS       | 39.0 | 8.0   | 16.1 | T | COG0589                                                                 | Universal stress protein UspA and related nucleotide-binding proteins                                                                                                                                                                                                                                                                                                                                           |
| BactD23074 CDS CDS     | 4.8  | 1.0   | 15.9 | T | COG1217                                                                 | Predicted membrane GTPase involved in stress response                                                                                                                                                                                                                                                                                                                                                           |
| Bint2045 CDS CDS       | 2.3  | 0.5   | 15.4 | T | COG1734                                                                 | DnaK suppressor protein                                                                                                                                                                                                                                                                                                                                                                                         |
| BWH21305 CDS CDS       | 2.3  | 0.5   | 15.4 | T | COG1734                                                                 | DnaK suppressor protein                                                                                                                                                                                                                                                                                                                                                                                         |
| BactD11172 CDS CDS     | 3.0  | 0.7   | 14.9 | T | COG0642 COG2198 COG2202 COG0784 COG3300 COG3452 COG3614                 | Signal transduction histidine kinase FOG: HPT domain FOG: PAS/PAC domain FOG: CheY-like receiver MHYT domain (predicted integral membrane sensor domain) Predicted periplasmic ligand-binding sensor domain Predicted periplasmic ligand-binding sensor domain                                                                                                                                                  |
| BactD13569 CDS CDS     | 4.0  | 1.0   | 13.2 | T | COG5002 COG3292 COG3706                                                 | Signal transduction histidine kinase Predicted periplasmic ligand-binding sensor domain Response regulator containing a CheY-like receiver domain and a GGDEF domain                                                                                                                                                                                                                                            |
| RintL12076 CDS CDS     | 4.0  | 1.0   | 13.2 | T | COG2202 COG3300 COG3706 COG5001 COG2200                                 | FOG: PAS/PAC domain MHYT domain (predicted integral membrane sensor domain) Response regulator containing a CheY-like receiver domain and a GGDEF domain Predicted signal transduction protein containing a membrane domain, an EAL and a GGDEF domain FOG: EAL domain                                                                                                                                          |
| Bste0574 CDS CDS       | 20.0 | 5.0   | 13.2 | T | COG1875 COG1702                                                         | Predicted ATPase related to phosphate starvation-inducible protein PhoH Phosphate starvation-inducible protein PhoH, predicted ATPase                                                                                                                                                                                                                                                                           |
| TS29Fae08381 CDS CDS   | 4.0  | 1.0   | 13.2 | T | COG1217                                                                 | Predicted membrane GTPase involved in stress response                                                                                                                                                                                                                                                                                                                                                           |
| Csym2462 CDS CDS       | 4.0  | 1.0   | 13.2 | T | COG0642 COG2202 COG5002 COG2770                                         | Signal transduction histidine kinase FOG: PAS/PAC domain Signal transduction histidine kinase FOG: HAMP domain                                                                                                                                                                                                                                                                                                  |
| CspSS22260 CDS CDS     | 2.0  | 0.5   | 13.2 | T | COG0394                                                                 | Protein-tyrosine-phosphatase                                                                                                                                                                                                                                                                                                                                                                                    |
| Bste2938 CDS CDS       | 7.0  | 2.0   | 11.6 | T | COG0664                                                                 | cAMP-binding proteins - catabolite gene activator and regulatory subunit of cAMP-dependent protein kinases                                                                                                                                                                                                                                                                                                      |
| TS28Rum13628 CDS CDS   | 2.0  | 66.5  | 0.1  | T | COG0618 COG3887                                                         | Exopolysphatase-related proteins Predicted signaling protein consisting of a modified GGDEF domain and a DHH domain                                                                                                                                                                                                                                                                                             |
| TS29Rum21102 CDS CDS   | 1.0  | 34.0  | 0.1  | T | COG2310 COG4110                                                         | Uncharacterized proteins involved in stress response, homologs of TerZ and putative cAMP-binding protein CABP1 Uncharacterized protein involved in stress response                                                                                                                                                                                                                                              |
| TS28Col0398 CDS CDS    | 1.0  | 36.0  | 0.1  | T | COG1966                                                                 | Carbon starvation protein, predicted membrane protein                                                                                                                                                                                                                                                                                                                                                           |
| TS29Rum17091 CDS CDS   | 1.0  | 36.0  | 0.1  | T | COG0664                                                                 | cAMP-binding proteins - catabolite gene activator and regulatory subunit of cAMP-dependent protein kinases                                                                                                                                                                                                                                                                                                      |
| TS28Bac6860 CDS CDS    | 0.7  | 24.0  | 0.1  | T | COG0642                                                                 | Signal transduction histidine kinase                                                                                                                                                                                                                                                                                                                                                                            |
| TS28Eub1226 CDS CDS    | 1.0  | 36.5  | 0.1  | T | COG0784                                                                 | FOG: CheY-like receiver                                                                                                                                                                                                                                                                                                                                                                                         |
| TS28Rum15157 CDS CDS   | 1.0  | 37.0  | 0.1  | T | COG2199                                                                 | FOG: GGDEF domain                                                                                                                                                                                                                                                                                                                                                                                               |
| Cnex0560 CDS CDS       | 1.9  | 70.7  | 0.1  | T | COG0642 COG2202 COG5002 COG2205                                         | Signal transduction histidine kinase FOG: PAS/PAC domain Signal transduction histidine kinase Osmosensitive K+ channel histidine kinase                                                                                                                                                                                                                                                                         |
| TS28Fae13067 CDS CDS   | 1.0  | 38.0  | 0.1  | T | COG0642 COG5002 COG2202                                                 | Signal transduction histidine kinase Signal transduction histidine kinase FOG: PAS/PAC domain                                                                                                                                                                                                                                                                                                                   |
| Ehal0756 CDS CDS       | 3.0  | 114.5 | 0.1  | T | COG0642 COG2198 COG2202 COG0784 COG5278 COG3300 COG5001 COG3452 COG3614 | Signal transduction histidine kinase FOG: HPT domain FOG: PAS/PAC domain FOG: CheY-like receiver Predicted periplasmic ligand-binding sensor domain MHYT domain (predicted integral membrane sensor domain) Predicted signal transduction protein containing a membrane domain, an EAL and a GGDEF domain Predicted periplasmic ligand-binding sensor domain Predicted periplasmic ligand-binding sensor domain |
| TS28Rum13923 CDS CDS   | 0.5  | 20.0  | 0.1  | T | COG1966                                                                 | Carbon starvation protein, predicted membrane protein                                                                                                                                                                                                                                                                                                                                                           |
| TS28Fae11159 CDS CDS   | 0.5  | 20.0  | 0.1  | T | COG0664                                                                 | cAMP-binding proteins - catabolite gene activator and regulatory subunit of cAMP-dependent protein kinases                                                                                                                                                                                                                                                                                                      |
| TS29Rum11493 CDS CDS   | 2.5  | 100.5 | 0.1  | T | COG2202 COG2203 COG3300 COG5278 COG5001 COG2200                         | FOG: PAS/PAC domain FOG: GAF domain MHYT domain (predicted integral membrane sensor domain) Predicted periplasmic ligand-binding sensor domain Predicted signal transduction protein containing a membrane domain, an EAL and a GGDEF domain FOG: EAL domain                                                                                                                                                    |
| TS28Fae21179 CDS CDS   | 0.3  | 13.5  | 0.1  | T | COG0664                                                                 | cAMP-binding proteins - catabolite gene activator and regulatory subunit of cAMP-dependent protein kinases                                                                                                                                                                                                                                                                                                      |
| TS28Eub8875 CDS CDS    | 1.5  | 62.5  | 0.1  | T | COG2972                                                                 | Predicted signal transduction protein with a C-terminal ATPase domain                                                                                                                                                                                                                                                                                                                                           |



|                      |     |       |     |   |                                                                         |                                                                                                                                                                                                                                                                                                                                                                                                                                        |
|----------------------|-----|-------|-----|---|-------------------------------------------------------------------------|----------------------------------------------------------------------------------------------------------------------------------------------------------------------------------------------------------------------------------------------------------------------------------------------------------------------------------------------------------------------------------------------------------------------------------------|
| TS28Rum10354 CDS CDS | 1.0 | 42.0  | 0.1 | T | COG2202 COG2203 COG3300 COG3322 COG5001 COG3706 COG4251 COG2199 COG2200 | FOG: PAS/PAC domain FOG: GAF domain MHYT domain (predicted integral membrane sensor domain) Predicted periplasmic ligand-binding sensor domain Predicted signal transduction protein containing a membrane domain, an EAL and a GGDEF domain Response regulator containing a CheY-like receiver domain and a GGDEF domain Bacteriophytochrome (light-regulated signal transduction histidine kinase) FOG: GGDEF domain FOG: EAL domain |
| CspSS20183 CDS CDS   | 0.5 | 21.6  | 0.1 | T | COG0642 COG2202 COG5002 COG2205 COG4250                                 | Signal transduction histidine kinase FOG: PAS/PAC domain Signal transduction histidine kinase Osmosensitive K+ channel histidine kinase Predicted sensor protein/domain                                                                                                                                                                                                                                                                |
| TS28Bac6602 CDS CDS  | 0.7 | 29.0  | 0.1 | T | COG0642                                                                 | Signal transduction histidine kinase                                                                                                                                                                                                                                                                                                                                                                                                   |
| TS28Rum10926 CDS CDS | 1.0 | 45.0  | 0.1 | T | COG0664                                                                 | cAMP-binding proteins - catabolite gene activator and regulatory subunit of cAMP-dependent protein kinases                                                                                                                                                                                                                                                                                                                             |
| FpraM2122506 CDS CDS | 2.8 | 126.8 | 0.1 | T | COG0642 COG2202 COG5002 COG2205 COG4250                                 | Signal transduction histidine kinase FOG: PAS/PAC domain Signal transduction histidine kinase Osmosensitive K+ channel histidine kinase Predicted sensor protein/domain                                                                                                                                                                                                                                                                |
| Even0457 CDS CDS     | 1.7 | 80.4  | 0.1 | T | COG0642 COG2202 COG5002 COG2205 COG4250                                 | Signal transduction histidine kinase FOG: PAS/PAC domain Signal transduction histidine kinase Osmosensitive K+ channel histidine kinase Predicted sensor protein/domain                                                                                                                                                                                                                                                                |
| CspL21156 CDS CDS    | 0.3 | 11.7  | 0.1 | T | COG0642 COG2202 COG5002 COG3300 COG4251 COG2205                         | Signal transduction histidine kinase FOG: PAS/PAC domain Signal transduction histidine kinase MHYT domain (predicted integral membrane sensor domain) Bacteriophytochrome (light-regulated signal transduction histidine kinase) Osmosensitive K+ channel histidine kinase                                                                                                                                                             |
| TS28Rum13607 CDS CDS | 0.5 | 24.5  | 0.1 | T | COG1702                                                                 | Phosphate starvation-inducible protein PhoH, predicted ATPase                                                                                                                                                                                                                                                                                                                                                                          |
| Dfor0143 CDS CDS     | 0.1 | 7.0   | 0.1 | T | COG0642 COG2202 COG0784 COG5002 COG2203 COG2205 COG4250                 | Signal transduction histidine kinase FOG: PAS/PAC domain FOG: CheY-like receiver Signal transduction histidine kinase FOG: GAF domain Osmosensitive K+ channel histidine kinase Predicted sensor protein/domain                                                                                                                                                                                                                        |
| Ccom0780 CDS CDS     | 0.8 | 42.2  | 0.1 | T | COG0642 COG2202 COG5002 COG2203 COG3322 COG2205 COG4250                 | Signal transduction histidine kinase FOG: PAS/PAC domain Signal transduction histidine kinase FOG: GAF domain Predicted periplasmic ligand-binding sensor domain Osmosensitive K+ channel histidine kinase Predicted sensor protein/domain                                                                                                                                                                                             |
| TS28Eub6518 CDS CDS  | 1.0 | 53.0  | 0.1 | T | COG0642 COG5002 COG2202 COG2770                                         | Signal transduction histidine kinase Signal transduction histidine kinase FOG: PAS/PAC domain FOG: HAMP domain                                                                                                                                                                                                                                                                                                                         |
| TS28Fae02109 CDS CDS | 0.5 | 30.0  | 0.1 | T | COG0642 COG5002 COG2202 COG0784 COG2203                                 | Signal transduction histidine kinase Signal transduction histidine kinase FOG: PAS/PAC domain FOG: CheY-like receiver FOG: GAF domain                                                                                                                                                                                                                                                                                                  |
| TS28Bac0861 CDS CDS  | 0.5 | 33.0  | 0.1 | T | COG2204                                                                 | Response regulator containing CheY-like receiver, AAA-type ATPase, and DNA-binding domains                                                                                                                                                                                                                                                                                                                                             |
| TS29Rum17077 CDS CDS | 1.0 | 79.0  | 0.0 | T | COG2202 COG3300 COG3322 COG5001 COG3706 COG2200                         | FOG: PAS/PAC domain MHYT domain (predicted integral membrane sensor domain) Predicted periplasmic ligand-binding sensor domain Predicted signal transduction protein containing a membrane domain, an EAL and a GGDEF domain Response regulator containing a CheY-like receiver domain and a GGDEF domain FOG: EAL domain                                                                                                              |
| CspSS21921 CDS CDS   | 0.2 | 13.4  | 0.0 | T | COG0642 COG5002 COG2205                                                 | Signal transduction histidine kinase Signal transduction histidine kinase Osmosensitive K+ channel histidine kinase                                                                                                                                                                                                                                                                                                                    |
| Ehal1717 CDS CDS     | 0.2 | 13.4  | 0.0 | T | COG0642 COG5002 COG2205                                                 | Signal transduction histidine kinase Signal transduction histidine kinase Osmosensitive K+ channel histidine kinase                                                                                                                                                                                                                                                                                                                    |
| Dlon2019 CDS CDS     | 0.3 | 20.8  | 0.0 | T | COG0642 COG2202 COG5002 COG3300 COG4251 COG2205                         | Signal transduction histidine kinase FOG: PAS/PAC domain Signal transduction histidine kinase MHYT domain (predicted integral membrane sensor domain) Bacteriophytochrome (light-regulated signal transduction histidine kinase) Osmosensitive K+ channel histidine kinase                                                                                                                                                             |
| TS28Fae20439 CDS CDS | 0.3 | 28.0  | 0.0 | T | COG0664                                                                 | cAMP-binding proteins - catabolite gene activator and regulatory subunit of cAMP-dependent protein kinases                                                                                                                                                                                                                                                                                                                             |
| TS29Rum17799 CDS CDS | 0.5 | 42.2  | 0.0 | T | COG0642 COG5002 COG2202 COG3292 COG2205 COG4250                         | Signal transduction histidine kinase Signal transduction histidine kinase FOG: PAS/PAC domain Predicted periplasmic ligand-binding sensor domain Osmosensitive K+ channel histidine kinase Predicted sensor protein/domain                                                                                                                                                                                                             |
| RintL10496 CDS CDS   | 0.5 | 42.2  | 0.0 | T | COG0642 COG2202 COG5002 COG3292 COG2205 COG4250                         | Signal transduction histidine kinase FOG: PAS/PAC domain Signal transduction histidine kinase Predicted periplasmic ligand-binding sensor domain Osmosensitive K+ channel histidine kinase Predicted sensor protein/domain                                                                                                                                                                                                             |
| CspM6212140 CDS CDS  | 0.5 | 42.2  | 0.0 | T | COG0642 COG2202 COG5002 COG3292 COG2205 COG4250                         | Signal transduction histidine kinase FOG: PAS/PAC domain Signal transduction histidine kinase Predicted periplasmic ligand-binding sensor domain Osmosensitive K+ channel histidine kinase Predicted sensor protein/domain                                                                                                                                                                                                             |
| TS28Eub8190 CDS CDS  | 0.5 | 43.5  | 0.0 | T | COG2972                                                                 | Predicted signal transduction protein with a C-terminal ATPase domain                                                                                                                                                                                                                                                                                                                                                                  |
| TS28Fae14486 CDS CDS | 1.0 | 89.5  | 0.0 | T | COG0642 COG5002 COG2202                                                 | Signal transduction histidine kinase Signal transduction histidine kinase FOG: PAS/PAC domain                                                                                                                                                                                                                                                                                                                                          |
| Beap0393 CDS CDS     | 0.3 | 23.0  | 0.0 | T | COG1217                                                                 | Predicted membrane GTPase involved in stress response                                                                                                                                                                                                                                                                                                                                                                                  |
| Dfor2877 CDS CDS     | 0.3 | 25.7  | 0.0 | T | COG0642 COG2202 COG5002 COG3300 COG4251 COG2205                         | Signal transduction histidine kinase FOG: PAS/PAC domain Signal transduction histidine kinase MHYT domain (predicted integral membrane sensor domain) Bacteriophytochrome (light-regulated signal transduction histidine kinase) Osmosensitive K+ channel histidine kinase                                                                                                                                                             |
| TS28Dor2629 CDS CDS  | 0.5 | 57.0  | 0.0 | T | COG2972                                                                 | Predicted signal transduction protein with a C-terminal ATPase domain                                                                                                                                                                                                                                                                                                                                                                  |
| TS29Dor2227 CDS CDS  | 0.5 | 59.0  | 0.0 | T | COG2972                                                                 | Predicted signal transduction protein with a C-terminal ATPase domain                                                                                                                                                                                                                                                                                                                                                                  |
| TS28Fae14120 CDS CDS | 0.5 | 59.2  | 0.0 | T | COG0642 COG5002 COG2202 COG2205 COG4250                                 | Signal transduction histidine kinase Signal transduction histidine kinase FOG: PAS/PAC domain Osmosensitive K+ channel histidine kinase Predicted sensor protein/domain                                                                                                                                                                                                                                                                |

|                      |      |      |       |     |                                                                                 |                                                                                                                                                                                                                                                                                                                                                                                                              |
|----------------------|------|------|-------|-----|---------------------------------------------------------------------------------|--------------------------------------------------------------------------------------------------------------------------------------------------------------------------------------------------------------------------------------------------------------------------------------------------------------------------------------------------------------------------------------------------------------|
| Dlon0976 CDS CDS     | 0.3  | 36.8 | 0.0   | T   | COG0642 COG2202 COG0784 COG5002 COG2203 COG3322 COG2205 COG4250                 | Signal transduction histidine kinase FOG: PAS/PAC domain FOG: CheY-like receiver Signal transduction histidine kinase FOG: GAF domain Predicted periplasmic ligand-binding sensor domain Osmosensitive K+ channel histidine kinase Predicted sensor protein/domain                                                                                                                                           |
| TS28Clo00099 CDS CDS | 0.3  | 30.0 | 0.0   | T   | COG0642 COG5002 COG2205                                                         | Signal transduction histidine kinase Signal transduction histidine kinase Osmosensitive K+ channel histidine kinase                                                                                                                                                                                                                                                                                          |
| Rbro0238 CDS CDS     | 0.3  | 32.0 | 0.0   | T   | COG0642 COG2202 COG5002 COG5001 COG4251 COG2205                                 | Signal transduction histidine kinase FOG: PAS/PAC domain Signal transduction histidine kinase Predicted signal transduction protein containing a membrane domain, an EAL and a GGDEF domain Bacteriophytochrome (light-regulated signal transduction histidine kinase) Osmosensitive K+ channel histidine kinase                                                                                             |
| TS28Eub7238 CDS CDS  | 0.2  | 21.9 | 0.0   | T   | COG0642 COG5002 COG2205                                                         | Signal transduction histidine kinase Signal transduction histidine kinase Osmosensitive K+ channel histidine kinase                                                                                                                                                                                                                                                                                          |
| Robe0036 CDS CDS     | 0.3  | 33.0 | 0.0   | T   | COG0642 COG2202 COG5002 COG3300 COG4251 COG2205                                 | Signal transduction histidine kinase FOG: PAS/PAC domain Signal transduction histidine kinase MHYT domain (predicted integral membrane sensor domain) Bacteriophytochrome (light-regulated signal transduction histidine kinase) Osmosensitive K+ channel histidine kinase                                                                                                                                   |
| CspM6210571 CDS CDS  | 0.3  | 37.8 | 0.0   | T   | COG0642 COG5002 COG3300 COG4251 COG2205                                         | Signal transduction histidine kinase Signal transduction histidine kinase MHYT domain (predicted integral membrane sensor domain) Bacteriophytochrome (light-regulated signal transduction histidine kinase) Osmosensitive K+ channel histidine kinase                                                                                                                                                       |
| Eeli2696 CDS CDS     | 0.3  | 43.1 | 0.0   | T   | COG0642 COG2202 COG5002 COG3300 COG4251 COG2205                                 | Signal transduction histidine kinase FOG: PAS/PAC domain Signal transduction histidine kinase MHYT domain (predicted integral membrane sensor domain) Bacteriophytochrome (light-regulated signal transduction histidine kinase) Osmosensitive K+ channel histidine kinase                                                                                                                                   |
| Ehal1316 CDS CDS     | 0.3  | 50.8 | 0.0   | T   | COG0642 COG2202 COG5002 COG3300 COG4251 COG2205                                 | Signal transduction histidine kinase FOG: PAS/PAC domain Signal transduction histidine kinase MHYT domain (predicted integral membrane sensor domain) Bacteriophytochrome (light-regulated signal transduction histidine kinase) Osmosensitive K+ channel histidine kinase                                                                                                                                   |
| FpraM2120017 CDS CDS | 0.3  | 50.9 | 0.0   | T   | COG0642 COG5002 COG3300 COG4251 COG2205                                         | Signal transduction histidine kinase Signal transduction histidine kinase MHYT domain (predicted integral membrane sensor domain) Bacteriophytochrome (light-regulated signal transduction histidine kinase) Osmosensitive K+ channel histidine kinase                                                                                                                                                       |
| Msmi751551 CDS CDS   | 43.8 | 0.5  | 289.9 | T C | COG0589 COG0633                                                                 | Universal stress protein UspA and related nucleotide-binding proteins Ferredoxin                                                                                                                                                                                                                                                                                                                             |
| Msmi740038 CDS CDS   | 2.8  | 0.3  | 36.6  | T C | COG5635 COG1413                                                                 | Predicted NTPase (NACHT family) FOG: HEAT repeat                                                                                                                                                                                                                                                                                                                                                             |
| TS28Fae09082 CDS CDS | 1.3  | 49.0 | 0.1   | T D | COG1674 COG1716                                                                 | DNA segregation ATPase FtsK/SpoIIIE and related proteins FOG: FHA domain                                                                                                                                                                                                                                                                                                                                     |
| Bpse1757 CDS CDS     | 0.5  | 38.5 | 0.0   | T D | COG1716 COG1674                                                                 | FOG: FHA domain DNA segregation ATPase FtsK/SpoIIIE and related proteins                                                                                                                                                                                                                                                                                                                                     |
| TS28Bif1812 CDS CDS  | 0.5  | 74.5 | 0.0   | T D | COG1674 COG1716                                                                 | DNA segregation ATPase FtsK/SpoIIIE and related proteins FOG: FHA domain                                                                                                                                                                                                                                                                                                                                     |
| BactD13268 CDS CDS   | 7.0  | 0.3  | 69.4  | T E | COG0642 COG2198 COG2202 COG0784 COG0834 COG3322                                 | Signal transduction histidine kinase FOG: HPT domain FOG: PAS/PAC domain FOG: CheY-like receiver ABC-type amino acid transport/signal transduction systems, periplasmic component/domain Predicted periplasmic ligand-binding sensor domain                                                                                                                                                                  |
| Msmi750695 CDS CDS   | 19.8 | 1.6  | 41.2  | T E | COG0834                                                                         | ABC-type amino acid transport/signal transduction systems, periplasmic component/domain                                                                                                                                                                                                                                                                                                                      |
| Msmi740985 CDS CDS   | 19.8 | 1.6  | 41.2  | T E | COG0834                                                                         | ABC-type amino acid transport/signal transduction systems, periplasmic component/domain                                                                                                                                                                                                                                                                                                                      |
| RintL13909 CDS CDS   | 11.0 | 1.0  | 36.4  | T E | COG0642 COG2198 COG2202 COG0784 COG0834 COG2203 COG3300 COG3452 COG3614         | Signal transduction histidine kinase FOG: HPT domain FOG: PAS/PAC domain FOG: CheY-like receiver ABC-type amino acid transport/signal transduction systems, periplasmic component/domain FOG: GAF domain MHYT domain (predicted integral membrane sensor domain) Predicted periplasmic ligand-binding sensor domain Predicted periplasmic ligand-binding sensor domain                                       |
| Msmi750694 CDS CDS   | 2.5  | 0.3  | 33.1  | T E | COG0834 COG0765                                                                 | ABC-type amino acid transport/signal transduction systems, periplasmic component/domain ABC-type amino acid transport system, permease component                                                                                                                                                                                                                                                             |
| Msmi740986 CDS CDS   | 5.0  | 0.6  | 28.3  | T E | COG0834 COG0765                                                                 | ABC-type amino acid transport/signal transduction systems, periplasmic component/domain ABC-type amino acid transport system, permease component                                                                                                                                                                                                                                                             |
| Hfil0004 CDS CDS     | 8.0  | 1.0  | 26.5  | T E | COG0642 COG2202 COG3447 COG0784 COG5002 COG0834 COG2770 COG2205 COG4250         | Signal transduction histidine kinase FOG: PAS/PAC domain Predicted integral membrane sensor domain FOG: CheY-like receiver Signal transduction histidine kinase ABC-type amino acid transport/signal transduction systems, periplasmic component/domain FOG: HAMP domain Osmosensitive K+ channel histidine kinase Predicted sensor protein/domain                                                           |
| ShigspD91559 CDS CDS | 5.0  | 1.0  | 16.5  | T E | COG0834                                                                         | ABC-type amino acid transport/signal transduction systems, periplasmic component/domain                                                                                                                                                                                                                                                                                                                      |
| Bova0146 CDS CDS     | 5.0  | 1.0  | 16.5  | T E | COG0642 COG2198 COG2202 COG0784 COG5002 COG3292 COG0834 COG5278 COG3300 COG2770 | Signal transduction histidine kinase FOG: HPT domain FOG: PAS/PAC domain FOG: CheY-like receiver Signal transduction histidine kinase Predicted periplasmic ligand-binding sensor domain ABC-type amino acid transport/signal transduction systems, periplasmic component/domain Predicted periplasmic ligand-binding sensor domain MHYT domain (predicted integral membrane sensor domain) FOG: HAMP domain |
| Svar1673 CDS CDS     | 17.0 | 5.0  | 11.2  | T E | COG0834                                                                         | ABC-type amino acid transport/signal transduction systems, periplasmic component/domain                                                                                                                                                                                                                                                                                                                      |

|                      |      |      |       |             |                                                                                                                                 |                                                                                                                                                                                                                                                                                                                                                                                                                                                                                                                                                                                                                                                                                                                                                                                                    |
|----------------------|------|------|-------|-------------|---------------------------------------------------------------------------------------------------------------------------------|----------------------------------------------------------------------------------------------------------------------------------------------------------------------------------------------------------------------------------------------------------------------------------------------------------------------------------------------------------------------------------------------------------------------------------------------------------------------------------------------------------------------------------------------------------------------------------------------------------------------------------------------------------------------------------------------------------------------------------------------------------------------------------------------------|
| CspSS22526 CDS CDS   | 5.0  | 1.5  | 11.0  | T E         | COG0834                                                                                                                         | ABC-type amino acid transport/signal transduction systems, periplasmic component/domain                                                                                                                                                                                                                                                                                                                                                                                                                                                                                                                                                                                                                                                                                                            |
| Bdor0746 CDS CDS     | 22.0 | 6.7  | 10.9  | T E         | COG0642 COG2198 COG0784 COG0834 COG2203 COG3300 COG4252 COG2770 COG3452                                                         | Signal transduction histidine kinase FOG: Hpt domain FOG: CheY-like receiver ABC-type amino acid transport/signal transduction systems, periplasmic component/domain FOG: GAF domain MHYT domain (predicted integral membrane sensor domain) Predicted transmembrane sensor domain FOG: HAMP domain Predicted periplasmic ligand-binding sensor domain                                                                                                                                                                                                                                                                                                                                                                                                                                             |
| RintL10436 CDS CDS   | 8.0  | 1.0  | 26.5  | T E K       | COG0642 COG2198 COG0784 COG0834 COG2203 COG3437 COG5278 COG2770 COG3452                                                         | Signal transduction histidine kinase FOG: Hpt domain FOG: CheY-like receiver ABC-type amino acid transport/signal transduction systems, periplasmic component/domain FOG: GAF domain Response regulator containing a CheY-like receiver domain and an HD-GYP domain Predicted periplasmic ligand-binding sensor domain FOG: HAMP domain Predicted periplasmic ligand-binding sensor domain                                                                                                                                                                                                                                                                                                                                                                                                         |
| Robe0731 CDS CDS     | 1.0  | 39.5 | 0.1   | T E K       | COG0642 COG2198 COG0784 COG0834 COG2203 COG3437 COG3300 COG2770 COG3452                                                         | Signal transduction histidine kinase FOG: Hpt domain FOG: CheY-like receiver ABC-type amino acid transport/signal transduction systems, periplasmic component/domain FOG: GAF domain Response regulator containing a CheY-like receiver domain and an HD-GYP domain MHYT domain (predicted integral membrane sensor domain) FOG: HAMP domain Predicted periplasmic ligand-binding sensor domain                                                                                                                                                                                                                                                                                                                                                                                                    |
| Dfor0158 CDS CDS     | 1.0  | 44.0 | 0.1   | T E K       | COG0642 COG2198 COG2202 COG0834 COG2203 COG3437 COG5278 COG3300 COG3452                                                         | Signal transduction histidine kinase FOG: Hpt domain FOG: PAS/PAC domain ABC-type amino acid transport/signal transduction systems, periplasmic component/domain FOG: GAF domain Response regulator containing a CheY-like receiver domain and an HD-GYP domain Predicted periplasmic ligand-binding sensor domain MHYT domain (predicted integral membrane sensor domain) Predicted periplasmic ligand-binding sensor domain                                                                                                                                                                                                                                                                                                                                                                      |
| Robe3764 CDS CDS     | 1.0  | 47.5 | 0.1   | T E K       | COG0642 COG2198 COG0834 COG2203 COG3437 COG5278 COG3300 COG3452 COG3614                                                         | Signal transduction histidine kinase FOG: Hpt domain ABC-type amino acid transport/signal transduction systems, periplasmic component/domain FOG: GAF domain Response regulator containing a CheY-like receiver domain and an HD-GYP domain Predicted periplasmic ligand-binding sensor domain MHYT domain (predicted integral membrane sensor domain) Predicted periplasmic ligand-binding sensor domain Predicted periplasmic ligand-binding sensor domain                                                                                                                                                                                                                                                                                                                                       |
| Robe2726 CDS CDS     | 1.0  | 98.0 | 0.0   | T E K       | COG0642 COG2198 COG2202 COG0784 COG0834 COG2203 COG3437 COG5278 COG3300 COG3452                                                 | Signal transduction histidine kinase FOG: Hpt domain FOG: PAS/PAC domain FOG: CheY-like receiver ABC-type amino acid transport/signal transduction systems, periplasmic component/domain FOG: GAF domain Response regulator containing a CheY-like receiver domain and an HD-GYP domain Predicted periplasmic ligand-binding sensor domain MHYT domain (predicted integral membrane sensor domain) Predicted periplasmic ligand-binding sensor domain                                                                                                                                                                                                                                                                                                                                              |
| Pmer2994 CDS CDS     | 2.0  | 0.5  | 13.2  | T E K L U Q | COG3291 COG0515 COG1506 COG4946 COG0823 COG1228 COG3710                                                                         | FOG: PKD repeat Serine/threonine protein kinase Dipeptidyl aminopeptidases acylaminoacyl-peptidases Uncharacterized protein related to the periplasmic component of the Tol biopolymer transport system Periplasmic component of the Tol biopolymer transport system Imidazolonepropionate and related amidohydrolases DNA-binding winged-HTH domains                                                                                                                                                                                                                                                                                                                                                                                                                                              |
| ShigspD90894 CDS CDS | 3.0  | 0.5  | 19.8  | T E K Q     | COG2204 COG1221 COG3604 COG3829 COG3284 COG3283                                                                                 | Response regulator containing CheY-like receiver, AAA-type ATPase, and DNA-binding domains Transcriptional regulators containing an AAA-type ATPase domain and a DNA-binding domain Transcriptional regulator containing GAF, AAA-type ATPase, and DNA binding domains Transcriptional regulator containing PAS, AAA-type ATPase, and DNA-binding domains Transcriptional activator of acetoin/glycerol metabolism Transcriptional regulator of aromatic amino acids metabolism                                                                                                                                                                                                                                                                                                                    |
| Bste0121 CDS CDS     | 10.0 | 2.0  | 16.5  | T F         | COG0737 COG3103 COG4085                                                                                                         | 5'-nucleotidase/2',3'-cyclic phosphodiesterase and related esterases SH3 domain protein Predicted RNA-binding protein, contains TRAM domain                                                                                                                                                                                                                                                                                                                                                                                                                                                                                                                                                                                                                                                        |
| Even0805 CDS CDS     | 66.0 | 2.0  | 109.1 | T K         | COG0317 COG2357                                                                                                                 | Guanosine polyphosphate pyrophosphohydrolases/synthetases Uncharacterized protein conserved in bacteria                                                                                                                                                                                                                                                                                                                                                                                                                                                                                                                                                                                                                                                                                            |
| Buni2044 CDS CDS     | 54.0 | 2.0  | 89.3  | T K         | COG3279                                                                                                                         | Response regulator of the LysR/AIcR family                                                                                                                                                                                                                                                                                                                                                                                                                                                                                                                                                                                                                                                                                                                                                         |
| Bste1223 CDS CDS     | 31.0 | 2.0  | 51.3  | T K         | COG4753 COG2207                                                                                                                 | Response regulator containing CheY-like receiver domain and AraC-type DNA-binding domain AraC-type DNA-binding domain-containing proteins                                                                                                                                                                                                                                                                                                                                                                                                                                                                                                                                                                                                                                                          |
| BactD13575 CDS CDS   | 6.2  | 0.5  | 41.0  | T K         | COG0745                                                                                                                         | Response regulators consisting of a CheY-like receiver domain and a winged-helix DNA-binding domain                                                                                                                                                                                                                                                                                                                                                                                                                                                                                                                                                                                                                                                                                                |
| Bxyl0397 CDS CDS     | 6.2  | 0.5  | 41.0  | T K         | COG0745                                                                                                                         | Response regulators consisting of a CheY-like receiver domain and a winged-helix DNA-binding domain                                                                                                                                                                                                                                                                                                                                                                                                                                                                                                                                                                                                                                                                                                |
| Bste0986 CDS CDS     | 5.5  | 0.5  | 36.4  | T K         | COG0642 COG2198 COG2202 COG0784 COG5002 COG2203 COG3437 COG3322 COG4252 COG3706 COG5001 COG4585 COG0745 COG2199 COG4251 COG2208 | Signal transduction histidine kinase FOG: Hpt domain FOG: PAS/PAC domain FOG: CheY-like receiver Signal transduction histidine kinase FOG: GAF domain Response regulator containing a CheY-like receiver domain and an HD-GYP domain Predicted periplasmic ligand-binding sensor domain Predicted transmembrane sensor domain Response regulator containing a CheY-like receiver domain and a GGDEF domain Predicted signal transduction protein containing a membrane domain, an EAL and a GGDEF domain Signal transduction histidine kinase Response regulators consisting of a CheY-like receiver domain and a winged-helix DNA-binding domain FOG: GGDEF domain Bacteriophytochrome (light-regulated signal transduction histidine kinase) Serine phosphatase RsbU, regulator of sigma subunit |

|                      |      |      |      |     |                                                                         |                                                                                                                                                                                                                                                                                                                                                                                                                                                                                                                            |
|----------------------|------|------|------|-----|-------------------------------------------------------------------------|----------------------------------------------------------------------------------------------------------------------------------------------------------------------------------------------------------------------------------------------------------------------------------------------------------------------------------------------------------------------------------------------------------------------------------------------------------------------------------------------------------------------------|
| FpraM2120635 CDS CDS | 4.7  | 0.5  | 30.9 | T K | COG4753 COG0745 COG2197 COG4977 COG2207 COG4936 COG3707                 | Response regulator containing CheY-like receiver domain and AraC-type DNA-binding domain Response regulators consisting of a CheY-like receiver domain and a winged-helix DNA-binding domain Response regulator containing a CheY-like receiver domain and an HTH DNA-binding domain Transcriptional regulator containing an amidase domain and an AraC-type DNA-binding HTH domain AraC-type DNA-binding domain-containing proteins Predicted sensor domain Response regulator with putative antiterminator output domain |
| Dfor3138 CDS CDS     | 18.0 | 2.0  | 29.8 | T K | COG0317                                                                 | Guanosine polyphosphate pyrophosphohydrolases/synthetases                                                                                                                                                                                                                                                                                                                                                                                                                                                                  |
| Bcap1917 CDS CDS     | 8.0  | 1.0  | 26.5 | T K | COG0642 COG2202 COG5002 COG0745                                         | Signal transduction histidine kinase FOG: PAS/PAC domain Signal transduction histidine kinase Response regulators consisting of a CheY-like receiver domain and a winged-helix DNA-binding domain                                                                                                                                                                                                                                                                                                                          |
| Bxyl0974 CDS CDS     | 3.7  | 0.5  | 24.3 | T K | COG0745                                                                 | Response regulators consisting of a CheY-like receiver domain and a winged-helix DNA-binding domain                                                                                                                                                                                                                                                                                                                                                                                                                        |
| Msmi740688 CDS CDS   | 3.5  | 0.5  | 22.8 | T K | COG2199 COG0517 COG1475 COG0618 COG1994 COG1900                         | FOG: GGDEF domain FOG: CBS domain Predicted transcriptional regulators Exopolyphosphatase-related proteins Zn-dependent proteases Uncharacterized conserved protein                                                                                                                                                                                                                                                                                                                                                        |
| Msmi750991 CDS CDS   | 3.5  | 0.5  | 22.8 | T K | COG2199 COG0517 COG1475 COG0618 COG1994 COG1900                         | FOG: GGDEF domain FOG: CBS domain Predicted transcriptional regulators Exopolyphosphatase-related proteins Zn-dependent proteases Uncharacterized conserved protein                                                                                                                                                                                                                                                                                                                                                        |
| BactD11047 CDS CDS   | 8.3  | 1.3  | 20.7 | T K | COG4753 COG2207                                                         | Response regulator containing CheY-like receiver domain and AraC-type DNA-binding domain AraC-type DNA-binding domain-containing proteins                                                                                                                                                                                                                                                                                                                                                                                  |
| Bxyl1337 CDS CDS     | 8.3  | 1.3  | 20.7 | T K | COG4753 COG2207                                                         | Response regulator containing CheY-like receiver domain and AraC-type DNA-binding domain AraC-type DNA-binding domain-containing proteins                                                                                                                                                                                                                                                                                                                                                                                  |
| ShigspD92657 CDS CDS | 6.0  | 1.0  | 19.8 | T K | COG3300 COG3322 COG5001 COG2200 COG2771 COG4943                         | MHYT domain (predicted integral membrane sensor domain) Predicted periplasmic ligand-binding sensor domain Predicted signal transduction protein containing a membrane domain, an EAL and a GGDEF domain FOG: EAL domain DNA-binding HTH domain-containing proteins Predicted signal transduction protein containing sensor and EAL domains                                                                                                                                                                                |
| RintL10372 CDS CDS   | 6.0  | 1.0  | 19.8 | T K | COG0745                                                                 | Response regulators consisting of a CheY-like receiver domain and a winged-helix DNA-binding domain                                                                                                                                                                                                                                                                                                                                                                                                                        |
| Msmi741242 CDS CDS   | 5.3  | 0.9  | 18.9 | T K | COG0517 COG0589 COG1994 COG2524 COG3448                                 | FOG: CBS domain Universal stress protein UspA and related nucleotide-binding proteins Zn-dependent proteases Predicted transcriptional regulator, contains C-terminal CBS domains CBS-domain-containing membrane protein                                                                                                                                                                                                                                                                                                   |
| Bdor1216 CDS CDS     | 5.0  | 1.0  | 16.5 | T K | COG4753 COG3279 COG3947                                                 | Response regulator containing CheY-like receiver domain and AraC-type DNA-binding domain Response regulator of the LytR/AlgR family Response regulator containing CheY-like receiver and SARP domains                                                                                                                                                                                                                                                                                                                      |
| Bryfor2860 CDS CDS   | 5.0  | 1.0  | 16.5 | T K | COG0745                                                                 | Response regulators consisting of a CheY-like receiver domain and a winged-helix DNA-binding domain                                                                                                                                                                                                                                                                                                                                                                                                                        |
| BactD12038 CDS CDS   | 3.1  | 0.8  | 13.7 | T K | COG0642 COG2202 COG0784 COG5002 COG2203 COG3437 COG2770 COG3614 COG2205 | Signal transduction histidine kinase FOG: PAS/PAC domain FOG: CheY-like receiver Signal transduction histidine kinase FOG: GAF domain Response regulator containing a CheY-like receiver domain and an HD-GYP domain FOG: HAMP domain Predicted periplasmic ligand-binding sensor domain Osmosensitive K <sup>+</sup> channel histidine kinase                                                                                                                                                                             |
| Acae1083 CDS CDS     | 4.0  | 1.0  | 13.2 | T K | COG3437 COG4252 COG3706 COG5001 COG2199 COG2770 COG2200 COG3614 COG2206 | Response regulator containing a CheY-like receiver domain and an HD-GYP domain Predicted transmembrane sensor domain Response regulator containing a CheY-like receiver domain and a GGDEF domain Predicted signal transduction protein containing a membrane domain, an EAL and a GGDEF domain FOG: GGDEF domain FOG: HAMP domain FOG: EAL domain Predicted periplasmic ligand-binding sensor domain HD-GYP domain                                                                                                        |
| RintL12135 CDS CDS   | 4.0  | 1.0  | 13.2 | T K | COG3437 COG3706 COG2770 COG4936 COG2206                                 | Response regulator containing a CheY-like receiver domain and an HD-GYP domain Response regulator containing a CheY-like receiver domain and a GGDEF domain FOG: HAMP domain Predicted sensor domain HD-GYP domain                                                                                                                                                                                                                                                                                                         |
| Cbol5796 CDS CDS     | 2.0  | 0.5  | 13.2 | T K | COG0745                                                                 | Response regulators consisting of a CheY-like receiver domain and a winged-helix DNA-binding domain                                                                                                                                                                                                                                                                                                                                                                                                                        |
| Pmer0794 CDS CDS     | 15.0 | 4.0  | 12.4 | T K | COG2204 COG1221 COG3604 COG3829                                         | Response regulator containing CheY-like receiver, AAA-type ATPase, and DNA-binding domains Transcriptional regulators containing an AAA-type ATPase domain and a DNA-binding domain Transcriptional regulator containing GAF, AAA-type ATPase, and DNA binding domains Transcriptional regulator containing PAS, AAA-type ATPase, and DNA-binding domains                                                                                                                                                                  |
| Bova2377 CDS CDS     | 3.7  | 1.0  | 12.1 | T K | COG0745                                                                 | Response regulators consisting of a CheY-like receiver domain and a winged-helix DNA-binding domain                                                                                                                                                                                                                                                                                                                                                                                                                        |
| Bdor0494 CDS CDS     | 47.5 | 13.0 | 12.1 | T K | COG0642 COG2202 COG5002 COG2203 COG3437 COG2770 COG2205                 | Signal transduction histidine kinase FOG: PAS/PAC domain Signal transduction histidine kinase FOG: GAF domain Response regulator containing a CheY-like receiver domain and an HD-GYP domain FOG: HAMP domain Osmosensitive K <sup>+</sup> channel histidine kinase                                                                                                                                                                                                                                                        |
| Dfor0997 CDS CDS     | 3.5  | 1.0  | 11.6 | T K | COG0745                                                                 | Response regulators consisting of a CheY-like receiver domain and a winged-helix DNA-binding domain                                                                                                                                                                                                                                                                                                                                                                                                                        |
| Acol1347 CDS CDS     | 10.0 | 3.0  | 11.0 | T K | COG4624 COG3604 COG3829 COG2000                                         | Iron only hydrogenase large subunit, C-terminal domain Transcriptional regulator containing GAF, AAA-type ATPase, and DNA binding domains Transcriptional regulator containing PAS, AAA-type ATPase, and DNA-binding domains Predicted Fe-S protein                                                                                                                                                                                                                                                                        |
| RintL13835 CDS CDS   | 2.5  | 83.0 | 0.1  | T K | COG0745                                                                 | Response regulators consisting of a CheY-like receiver domain and a winged-helix DNA-binding domain                                                                                                                                                                                                                                                                                                                                                                                                                        |

|                         |       |      |      |       |                                                                                                                                                 |                                                                                                                                                                                                                                                                                                                                                                                                                                                                                                                                                                                                                                                                                                                                                                                                                                                                                                                                                                    |
|-------------------------|-------|------|------|-------|-------------------------------------------------------------------------------------------------------------------------------------------------|--------------------------------------------------------------------------------------------------------------------------------------------------------------------------------------------------------------------------------------------------------------------------------------------------------------------------------------------------------------------------------------------------------------------------------------------------------------------------------------------------------------------------------------------------------------------------------------------------------------------------------------------------------------------------------------------------------------------------------------------------------------------------------------------------------------------------------------------------------------------------------------------------------------------------------------------------------------------|
| Rlac0025 CDS CDS        | 0.3   | 9.6  | 0.1  | T K   | COG0745                                                                                                                                         | Response regulators consisting of a CheY-like receiver domain and a winged-helix DNA-binding domain                                                                                                                                                                                                                                                                                                                                                                                                                                                                                                                                                                                                                                                                                                                                                                                                                                                                |
| Ehal0295 CDS CDS        | 0.5   | 23.0 | 0.1  | T K   | COG0317                                                                                                                                         | Guanosine polyphosphate pyrophosphohydrolases/synthetases                                                                                                                                                                                                                                                                                                                                                                                                                                                                                                                                                                                                                                                                                                                                                                                                                                                                                                          |
| Dlon2015 CDS CDS        | 1.0   | 47.5 | 0.1  | T K   | COG0317 COG2357                                                                                                                                 | Guanosine polyphosphate pyrophosphohydrolases/synthetases Uncharacterized protein conserved in bacteria                                                                                                                                                                                                                                                                                                                                                                                                                                                                                                                                                                                                                                                                                                                                                                                                                                                            |
| Even0023 CDS CDS        | 2.0   | 97.5 | 0.1  | T K   | COG0745                                                                                                                                         | Response regulators consisting of a CheY-like receiver domain and a winged-helix DNA-binding domain                                                                                                                                                                                                                                                                                                                                                                                                                                                                                                                                                                                                                                                                                                                                                                                                                                                                |
| Buni2842 CDS CDS        | 0.2   | 10.5 | 0.1  | T K   | COG0317                                                                                                                                         | Guanosine polyphosphate pyrophosphohydrolases/synthetases                                                                                                                                                                                                                                                                                                                                                                                                                                                                                                                                                                                                                                                                                                                                                                                                                                                                                                          |
| Ehal1052 CDS CDS        | 0.6   | 39.5 | 0.0  | T K   | COG0745                                                                                                                                         | Response regulators consisting of a CheY-like receiver domain and a winged-helix DNA-binding domain                                                                                                                                                                                                                                                                                                                                                                                                                                                                                                                                                                                                                                                                                                                                                                                                                                                                |
| Even1454 CDS CDS        | 0.3   | 20.6 | 0.0  | T K   | COG0745                                                                                                                                         | Response regulators consisting of a CheY-like receiver domain and a winged-helix DNA-binding domain                                                                                                                                                                                                                                                                                                                                                                                                                                                                                                                                                                                                                                                                                                                                                                                                                                                                |
| Ccom0781 CDS CDS        | 0.6   | 51.0 | 0.0  | T K   | COG0745                                                                                                                                         | Response regulators consisting of a CheY-like receiver domain and a winged-helix DNA-binding domain                                                                                                                                                                                                                                                                                                                                                                                                                                                                                                                                                                                                                                                                                                                                                                                                                                                                |
| PRABACTJOHN0673 CDS CDS | 9.0   | 1.0  | 29.8 | T K G | COG0642 COG2198 COG2202 COG0784 COG5002 COG3292 COG3322 COG4753 COG3706 COG5001 COG0745 COG0745 COG2972 COG1879 COG2114 COG4251 COG2770 COG2172 | Signal transduction histidine kinase FOG: HPT domain FOG: PAS/PAC domain FOG: CheY-like receiver Signal transduction histidine kinase Predicted periplasmic ligand-binding sensor domain Predicted periplasmic ligand-binding sensor domain Response regulator containing CheY-like receiver domain and AraC-type DNA-binding domain Response regulator containing a CheY-like receiver domain and a GGDEF domain Predicted signal transduction protein containing a membrane domain, an EAL and a GGDEF domain Response regulators consisting of a CheY-like receiver domain and a winged-helix DNA-binding domain Predicted signal transduction protein with a C-terminal ATPase domain ABC-type sugar transport system, periplasmic component Adenylate cyclase, family 3 (some proteins contain HAMP domain) Bacteriophytochrome (light-regulated signal transduction histidine kinase) FOG: HAMP domain Anti-sigma regulatory factor (Ser/Thr protein kinase) |
| Buni2328 CDS CDS        | 181.0 | 32.0 | 18.7 | T K G | COG0642 COG2202 COG0784 COG5002 COG3292 COG3322 COG4753 COG3706 COG5001 COG0745 COG2972 COG1879 COG2114 COG4251 COG2770                         | Signal transduction histidine kinase FOG: PAS/PAC domain FOG: CheY-like receiver Signal transduction histidine kinase Predicted periplasmic ligand-binding sensor domain Predicted periplasmic ligand-binding sensor domain Response regulator containing CheY-like receiver domain and AraC-type DNA-binding domain Response regulator containing a CheY-like receiver domain and a GGDEF domain Predicted signal transduction protein containing a membrane domain, an EAL and a GGDEF domain Response regulators consisting of a CheY-like receiver domain and a winged-helix DNA-binding domain Predicted signal transduction protein with a C-terminal ATPase domain ABC-type sugar transport system, periplasmic component Adenylate cyclase, family 3 (some proteins contain HAMP domain) Bacteriophytochrome (light-regulated signal transduction histidine kinase) FOG: HAMP domain                                                                       |
| PRABACTJOHN0019 CDS CDS | 5.0   | 1.0  | 16.5 | T K G | COG4753 COG2207 COG3664                                                                                                                         | Response regulator containing CheY-like receiver domain and AraC-type DNA-binding domain AraC-type DNA-binding domain-containing proteins Beta-xvlosidase                                                                                                                                                                                                                                                                                                                                                                                                                                                                                                                                                                                                                                                                                                                                                                                                          |
| Bova2147 CDS CDS        | 2.5   | 0.5  | 16.5 | T K G | COG0642 COG2198 COG2202 COG0784 COG5002 COG3292 COG3322 COG4753 COG3706 COG5001 COG4585 COG0745 COG2199 COG2972 COG1879 COG2114 COG4251 COG2207 | Signal transduction histidine kinase FOG: HPT domain FOG: PAS/PAC domain FOG: CheY-like receiver Signal transduction histidine kinase Predicted periplasmic ligand-binding sensor domain Response regulator containing CheY-like receiver domain and AraC-type DNA-binding domain Response regulator containing a CheY-like receiver domain and a GGDEF domain Predicted signal transduction protein containing a membrane domain, an EAL and a GGDEF domain Signal transduction histidine kinase Response regulators consisting of a CheY-like receiver domain and a winged-helix DNA-binding domain FOG: GGDEF domain Predicted signal transduction protein with a C-terminal ATPase domain ABC-type sugar transport system, periplasmic component Adenylate cyclase, family 3 (some proteins contain HAMP domain) Bacteriophytochrome (light-regulated signal transduction histidine kinase) AraC-type DNA-binding domain-containing proteins                   |
| Bdor1046 CDS CDS        | 0.3   | 26.5 | 0.0  | T K G | COG0642 COG2202 COG0784 COG5002 COG3292 COG3300 COG4753 COG3706 COG5001 COG0745 COG2972 COG1879 COG2114 COG4251 COG2770                         | Signal transduction histidine kinase FOG: PAS/PAC domain FOG: CheY-like receiver Signal transduction histidine kinase Predicted periplasmic ligand-binding sensor domain MHYT domain (predicted integral membrane sensor domain) Response regulator containing CheY-like receiver domain and AraC-type DNA-binding domain Response regulator containing a CheY-like receiver domain and a GGDEF domain Predicted signal transduction protein containing a membrane domain, an EAL and a GGDEF domain Response regulators consisting of a CheY-like receiver domain and a winged-helix DNA-binding domain Predicted signal transduction protein with a C-terminal ATPase domain ABC-type sugar transport system, periplasmic component Adenylate cyclase, family 3 (some proteins contain HAMP domain) Bacteriophytochrome (light-regulated signal transduction histidine kinase) FOG: HAMP domain                                                                  |
| RintL12266 CDS CDS      | 46.0  | 3.0  | 50.7 | T K L | COG0515                                                                                                                                         | Serine/threonine protein kinase                                                                                                                                                                                                                                                                                                                                                                                                                                                                                                                                                                                                                                                                                                                                                                                                                                                                                                                                    |
| Robe0717 CDS CDS        | 10.8  | 1.8  | 19.5 | T K L | COG0515 COG3899 COG3391 COG2815 COG5616 COG2319 COG2909                                                                                         | Serine/threonine protein kinase Predicted ATPase Uncharacterized conserved protein Uncharacterized protein conserved in bacterial Predicted integral membrane protein FOG: WD40 repeat ATP-dependent transcriptional regulator                                                                                                                                                                                                                                                                                                                                                                                                                                                                                                                                                                                                                                                                                                                                     |

|                        |       |         |       |       |                                                                 |                                                                                                                                                                                                                                                                                                                                                                                        |
|------------------------|-------|---------|-------|-------|-----------------------------------------------------------------|----------------------------------------------------------------------------------------------------------------------------------------------------------------------------------------------------------------------------------------------------------------------------------------------------------------------------------------------------------------------------------------|
| FpraM2121072 CDS CDS   | 4.0   | 1.0     | 13.2  | T K L | COG0515 COG3899 COG2815 COG0631                                 | Serine/threonine protein kinase Predicted ATPase Uncharacterized protein conserved in bacteria Serine/threonine protein phosphatase                                                                                                                                                                                                                                                    |
| Dfor2334 CDS CDS       | 7.5   | 2.0     | 12.4  | T K L | COG0515 COG3391 COG2815 COG5616                                 | Serine/threonine protein kinase Uncharacterized conserved protein Uncharacterized protein conserved in bacteria Predicted integral membrane protein                                                                                                                                                                                                                                    |
| Bpse1732 CDS CDS       | 10.0  | 3.2     | 10.4  | T K L | COG0515 COG3899 COG3391 COG2815 COG5616 COG1262 COG2909         | Serine/threonine protein kinase Predicted ATPase Uncharacterized conserved protein Uncharacterized protein conserved in bacteria Predicted integral membrane protein Uncharacterized conserved protein ATP-dependent transcriptional regulator                                                                                                                                         |
| Bryfor1746 CDS CDS     | 11.0  | 1.0     | 36.4  | T L G | COG1372 COG0574 COG1080 COG4668 COG3412 COG3605 COG1925         | Intein/homing endonuclease Phosphoenolpyruvate synthase/pyruvate phosphate dikinase Phosphoenolpyruvate-protein kinase (PTS system EI component in bacteria) Mannitol/fructose-specific phosphotransferase system, IIA domain Uncharacterized protein conserved in bacteria Signal transduction protein containing GAF and PtsI domains Phosphotransferase system_HPR-related proteins |
| Ehal1148 CDS CDS       | 10.0  | 3.0     | 11.0  | T M   | COG1388 COG3409 COG3103 COG0860 COG2861                         | FOG: LysM repeat Putative peptidoglycan-binding domain-containing protein SH3 domain protein N-acetylmuramoyl-L-alanine amidase Uncharacterized protein conserved in bacteria                                                                                                                                                                                                          |
| Rbro0064 CDS CDS       | 2.5   | 86.5    | 0.1   | T M   | COG1388 COG3409 COG3103 COG0791 COG3883                         | FOG: LysM repeat Putative peptidoglycan-binding domain-containing protein SH3 domain protein Cell wall-associated hydrolases (invasion-associated proteins) Uncharacterized protein conserved in bacteria                                                                                                                                                                              |
| Ehal0337 CDS CDS       | 1.3   | 48.0    | 0.1   | T M   | COG1388 COG3409 COG3103 COG0791 COG3883 COG0739 COG2951 COG5412 | FOG: LysM repeat Putative peptidoglycan-binding domain-containing protein SH3 domain protein Cell wall-associated hydrolases (invasion-associated proteins) Uncharacterized protein conserved in bacteria Membrane proteins related to metalloendopeptidases Membrane-bound lytic murein transglycosylase B Phage-related protein                                                      |
| Ccom0346 CDS CDS       | 3.8   | 217.5   | 0.1   | T M   | COG1388 COG3409 COG3103 COG0791 COG3883 COG0739 COG2951 COG5412 | FOG: LysM repeat Putative peptidoglycan-binding domain-containing protein SH3 domain protein Cell wall-associated hydrolases (invasion-associated proteins) Uncharacterized protein conserved in bacteria Membrane proteins related to metalloendopeptidases Membrane-bound lytic murein transglycosylase B Phage-related protein                                                      |
| RintL10418 CDS CDS     | 19.0  | 3.0     | 20.9  | T N   | COG2202 COG0840                                                 | FOG: PAS/PAC domain Methyl-accepting chemotaxis protein                                                                                                                                                                                                                                                                                                                                |
| Eeli0733 CDS CDS       | 1.0   | 34.0    | 0.1   | T N   | COG2202 COG5278 COG0840                                         | FOG: PAS/PAC domain Predicted periplasmic ligand-binding sensor domain Methyl-accepting chemotaxis protein                                                                                                                                                                                                                                                                             |
| Bdor3305 CDS CDS       | 9.0   | 1.0     | 29.8  | T O   | COG1225 COG1391                                                 | Peroxiredoxin Glutamine synthetase adenyltransferase                                                                                                                                                                                                                                                                                                                                   |
| Even1108 CDS CDS       | 101.0 | 3.0     | 111.3 | U     | COG3451                                                         | Type IV secretory pathway_VirB4 components                                                                                                                                                                                                                                                                                                                                             |
| Bste0764 CDS CDS       | 21.0  | 1.0     | 69.4  | U     | COG1862                                                         | Preprotein translocase subunit YaiC                                                                                                                                                                                                                                                                                                                                                    |
| Msmi751123 CDS CDS     | 5.7   | 0.3     | 56.2  | U     | COG0681                                                         | Signal peptidase I                                                                                                                                                                                                                                                                                                                                                                     |
| Pmer2423 CDS CDS       | 13.0  | 1.0     | 43.0  | U     | COG0811                                                         | Biopolymer transport proteins                                                                                                                                                                                                                                                                                                                                                          |
| Bste2988 CDS CDS       | 16.0  | 2.0     | 26.5  | U     | COG2095                                                         | Multiple antibiotic transporter                                                                                                                                                                                                                                                                                                                                                        |
| Bdor1195 CDS CDS       | 8.0   | 1.0     | 26.5  | U     | COG1862                                                         | Preprotein translocase subunit YaiC                                                                                                                                                                                                                                                                                                                                                    |
| TS29Fae09073 CDS CDS   | 7.5   | 1.0     | 24.8  | U     | COG3505                                                         | Type IV secretory pathway_VirD4 components                                                                                                                                                                                                                                                                                                                                             |
| Bste1204 CDS CDS       | 7.5   | 1.0     | 24.8  | U     | COG0552                                                         | Signal recognition particle GTPase                                                                                                                                                                                                                                                                                                                                                     |
| Cbol5940 CDS CDS       | 11.0  | 1.5     | 24.3  | U     | COG0653                                                         | Preprotein translocase subunit SecA (ATPase, RNA helicase)                                                                                                                                                                                                                                                                                                                             |
| BactD14280 CDS CDS     | 3.7   | 0.5     | 24.3  | U     | COG0342                                                         | Preprotein translocase subunit SecD                                                                                                                                                                                                                                                                                                                                                    |
| TS29Bac09291 CDS CDS   | 3.6   | 0.5     | 23.7  | U     | COG0811                                                         | Biopolymer transport proteins                                                                                                                                                                                                                                                                                                                                                          |
| Pmer2943 CDS CDS       | 7.0   | 1.0     | 23.1  | U     | COG2095                                                         | Multiple antibiotic transporter                                                                                                                                                                                                                                                                                                                                                        |
| Bdor2771 CDS CDS       | 14.0  | 2.0     | 23.1  | U     | COG0811                                                         | Biopolymer transport proteins                                                                                                                                                                                                                                                                                                                                                          |
| Acol2083 CDS CDS       | 6.5   | 1.0     | 21.5  | U     | COG3505                                                         | Type IV secretory pathway_VirD4 components                                                                                                                                                                                                                                                                                                                                             |
| TS29RumUnc1729 CDS CDS | 6.0   | 1.0     | 19.8  | U     | COG3451                                                         | Type IV secretory pathway_VirB4 components                                                                                                                                                                                                                                                                                                                                             |
| Bxyl1665 CDS CDS       | 1.6   | 0.3     | 15.7  | U     | COG0201                                                         | Preprotein translocase subunit SecY                                                                                                                                                                                                                                                                                                                                                    |
| TS29Fae03868 CDS CDS   | 2.3   | 0.5     | 15.4  | U     | COG0653                                                         | Preprotein translocase subunit SecA (ATPase, RNA helicase)                                                                                                                                                                                                                                                                                                                             |
| Hfil2919 CDS CDS       | 2.2   | 0.5     | 14.3  | U     | COG3843                                                         | Type IV secretory pathway_VirD2 components (relaxase)                                                                                                                                                                                                                                                                                                                                  |
| Msmi740423 CDS CDS     | 5.8   | 1.3     | 14.3  | U     | COG0541                                                         | Signal recognition particle GTPase                                                                                                                                                                                                                                                                                                                                                     |
| Bste2609 CDS CDS       | 20.0  | 5.0     | 13.3  | U     | COG0811                                                         | Biopolymer transport proteins                                                                                                                                                                                                                                                                                                                                                          |
| TS29Fae10381 CDS CDS   | 4.0   | 1.0     | 13.2  | U     | COG3505                                                         | Type IV secretory pathway_VirD4 components                                                                                                                                                                                                                                                                                                                                             |
| Bxyl1500 CDS CDS       | 1.3   | 0.3     | 13.2  | U     | COG0811                                                         | Biopolymer transport proteins                                                                                                                                                                                                                                                                                                                                                          |
| TS29Bac07504 CDS CDS   | 1.3   | 0.3     | 13.2  | U     | COG0811                                                         | Biopolymer transport proteins                                                                                                                                                                                                                                                                                                                                                          |
| BactD11207 CDS CDS     | 1.3   | 0.3     | 13.2  | U     | COG0811                                                         | Biopolymer transport proteins                                                                                                                                                                                                                                                                                                                                                          |
| Bdor2413 CDS CDS       | 8.0   | 2.0     | 13.2  | U     | COG0552                                                         | Signal recognition particle GTPase                                                                                                                                                                                                                                                                                                                                                     |
| TS29RumUnc0587 CDS CDS | 11.0  | 3.0     | 12.1  | U     | COG0653                                                         | Preprotein translocase subunit SecA (ATPase, RNA helicase)                                                                                                                                                                                                                                                                                                                             |
| Bdor4320 CDS CDS       | 17.3  | 5.0     | 11.5  | U     | COG0201                                                         | Preprotein translocase subunit SecY                                                                                                                                                                                                                                                                                                                                                    |
| Msmi751254 CDS CDS     | 5.8   | 1.7     | 11.4  | U     | COG0541                                                         | Signal recognition particle GTPase                                                                                                                                                                                                                                                                                                                                                     |
| TS28Rum13871 CDS CDS   | 8.0   | 275.0   | 0.1   | U     | COG3843                                                         | Type IV secretory pathway_VirD2 components (relaxase)                                                                                                                                                                                                                                                                                                                                  |
| TS28Bif3690 CDS CDS    | 1.0   | 34.5    | 0.1   | U     | COG0552                                                         | Signal recognition particle GTPase                                                                                                                                                                                                                                                                                                                                                     |
| TS28Fae13999 CDS CDS   | 2.0   | 71.0    | 0.1   | U     | COG3843                                                         | Type IV secretory pathway_VirD2 components (relaxase)                                                                                                                                                                                                                                                                                                                                  |
| Clep1867 CDS CDS       | 0.7   | 24.5    | 0.1   | U     | COG3843                                                         | Type IV secretory pathway_VirD2 components (relaxase)                                                                                                                                                                                                                                                                                                                                  |
| TS28Rum00163 CDS CDS   | 1.0   | 37.0    | 0.1   | U     | COG3451                                                         | Type IV secretory pathway_VirB4 components                                                                                                                                                                                                                                                                                                                                             |
| TS28Eub4514 CDS CDS    | 2.0   | 77.0    | 0.1   | U     | COG3210                                                         | Large exoproteins involved in heme utilization or adhesion                                                                                                                                                                                                                                                                                                                             |
| Cnex1094 CDS CDS       | 1.1   | 44.4    | 0.1   | U     | COG3843                                                         | Type IV secretory pathway_VirD2 components (relaxase)                                                                                                                                                                                                                                                                                                                                  |
| TS28Rum14281 CDS CDS   | 3.0   | 118.0   | 0.1   | U     | COG3843                                                         | Type IV secretory pathway_VirD2 components (relaxase)                                                                                                                                                                                                                                                                                                                                  |
| TS28Eub6448 CDS CDS    | 3.0   | 121.5   | 0.1   | U     | COG0342 COG0341                                                 | Preprotein translocase subunit SecD Preprotein translocase subunit SecF                                                                                                                                                                                                                                                                                                                |
| TS28Dor2920 CDS CDS    | 4.0   | 163.0   | 0.1   | U     | COG3843                                                         | Type IV secretory pathway_VirD2 components (relaxase)                                                                                                                                                                                                                                                                                                                                  |
| Clep1850 CDS CDS       | 4.0   | 164.0   | 0.1   | U     | COG3843                                                         | Type IV secretory pathway_VirD2 components (relaxase)                                                                                                                                                                                                                                                                                                                                  |
| TS28Fae14315 CDS CDS   | 0.5   | 21.0    | 0.1   | U     | COG3843                                                         | Type IV secretory pathway_VirD2 components (relaxase)                                                                                                                                                                                                                                                                                                                                  |
| TS28Fae17111 CDS CDS   | 0.5   | 21.0    | 0.1   | U     | COG0805                                                         | Sec-independent protein secretion pathway component TatC                                                                                                                                                                                                                                                                                                                               |
| Cnex3323 CDS CDS       | 27.0  | 1,136.0 | 0.1   | U     | COG3843                                                         | Type IV secretory pathway_VirD2 components (relaxase)                                                                                                                                                                                                                                                                                                                                  |
| TS29Fae10431 CDS CDS   | 1.0   | 43.0    | 0.1   | U     | COG3505                                                         | Type IV secretory pathway_VirD4 components                                                                                                                                                                                                                                                                                                                                             |
| Cnex0501 CDS CDS       | 0.5   | 21.5    | 0.1   | U     | COG3505                                                         | Type IV secretory pathway_VirD4 components                                                                                                                                                                                                                                                                                                                                             |
| Bean2364 CDS CDS       | 2.0   | 87.3    | 0.1   | U     | COG3451                                                         | Type IV secretory pathway_VirB4 components                                                                                                                                                                                                                                                                                                                                             |
| TS29Rum11722 CDS CDS   | 2.5   | 111.0   | 0.1   | U     | COG3505                                                         | Type IV secretory pathway_VirD4 components                                                                                                                                                                                                                                                                                                                                             |
| Casp0367 CDS CDS       | 0.3   | 15.0    | 0.1   | U     | COG3451                                                         | Type IV secretory pathway_VirB4 components                                                                                                                                                                                                                                                                                                                                             |
| TS28Eub3948 CDS CDS    | 0.7   | 31.0    | 0.1   | U     | COG3505                                                         | Type IV secretory pathway_VirD4 components                                                                                                                                                                                                                                                                                                                                             |
| TS29Rum18654 CDS CDS   | 1.0   | 47.0    | 0.1   | U     | COG0706                                                         | Preprotein translocase subunit YidC                                                                                                                                                                                                                                                                                                                                                    |
| Cbol3916 CDS CDS       | 1.9   | 90.8    | 0.1   | U     | COG3843                                                         | Type IV secretory pathway_VirD2 components (relaxase)                                                                                                                                                                                                                                                                                                                                  |

|                      |         |       |       |       |                         |                                                                                                                                       |
|----------------------|---------|-------|-------|-------|-------------------------|---------------------------------------------------------------------------------------------------------------------------------------|
| Rbro0069 CDS CDS     | 3.3     | 159.5 | 0.1   | U     | COG3843                 | Type IV secretory pathway, VirD2 components (relaxase)                                                                                |
| TS29Rum16825 CDS CDS | 2.0     | 99.0  | 0.1   | U     | COG0653                 | Preprotein translocase subunit SecA (ATPase, RNA helicase)                                                                            |
| TS28Clo01318 CDS CDS | 3.0     | 151.0 | 0.1   | U     | COG0706                 | Preprotein translocase subunit YidC                                                                                                   |
| TS29Rum11866 CDS CDS | 2.5     | 129.8 | 0.1   | U     | COG3451                 | Type IV secretory pathway, VirB4 components                                                                                           |
| FpraM2122489 CDS CDS | 1.3     | 66.0  | 0.1   | U     | COG3451                 | Type IV secretory pathway, VirB4 components                                                                                           |
| TS28Clo02892 CDS CDS | 1.0     | 53.0  | 0.1   | U     | COG0653                 | Preprotein translocase subunit SecA (ATPase, RNA helicase)                                                                            |
| TS28Fae08945 CDS CDS | 0.3     | 18.0  | 0.1   | U     | COG3843                 | Type IV secretory pathway, VirD2 components (relaxase)                                                                                |
| TS28Clo01712 CDS CDS | 3.0     | 166.0 | 0.1   | U     | COG0681                 | Signal peptidase I                                                                                                                    |
| Pmer1017 CDS CDS     | 0.2     | 11.1  | 0.1   | U     | COG3505                 | Type IV secretory pathway, VirD4 components                                                                                           |
| TS28Rum10355 CDS CDS | 0.5     | 28.0  | 0.1   | U     | COG0552                 | Signal recognition particle GTPase                                                                                                    |
| FpraM2120047 CDS CDS | 0.6     | 36.7  | 0.1   | U     | COG3843                 | Type IV secretory pathway, VirD2 components (relaxase)                                                                                |
| Csci2501 CDS CDS     | 0.2     | 11.6  | 0.1   | U     | COG3505                 | Type IV secretory pathway, VirD4 components                                                                                           |
| FpraM2122523 CDS CDS | 0.6     | 39.2  | 0.1   | U     | COG3843                 | Type IV secretory pathway, VirD2 components (relaxase)                                                                                |
| TS28Clo00923 CDS CDS | 1.0     | 63.0  | 0.1   | U     | COG0681                 | Signal peptidase I                                                                                                                    |
| CspL20091 CDS CDS    | 1.3     | 79.5  | 0.1   | U     | COG3451                 | Type IV secretory pathway, VirB4 components                                                                                           |
| TS28Clo01547 CDS CDS | 3.0     | 196.0 | 0.1   | U     | COG0541                 | Signal recognition particle GTPase                                                                                                    |
| Buni1972 CDS CDS     | 0.2     | 13.6  | 0.0   | U     | COG3505                 | Type IV secretory pathway, VirD4 components                                                                                           |
| Rena0455 CDS CDS     | 1.0     | 70.0  | 0.0   | U     | COG3451                 | Type IV secretory pathway, VirB4 components                                                                                           |
| TS28Rum11468 CDS CDS | 0.3     | 23.7  | 0.0   | U     | COG0201                 | Preprotein translocase subunit SecY                                                                                                   |
| TS29Rum18923 CDS CDS | 2.0     | 156.0 | 0.0   | U     | COG3451                 | Type IV secretory pathway, VirB4 components                                                                                           |
| TS28Fae19272 CDS CDS | 1.0     | 102.0 | 0.0   | U     | COG3451                 | Type IV secretory pathway, VirB4 components                                                                                           |
| TS28Dor3154 CDS CDS  | 2.5     | 275.8 | 0.0   | U     | COG3451                 | Type IV secretory pathway, VirB4 components                                                                                           |
| TS28Eub5038 CDS CDS  | 1.0     | 113.8 | 0.0   | U     | COG0653                 | Preprotein translocase subunit SecA (ATPase, RNA helicase)                                                                            |
| Acac2246 CDS CDS     | 0.1     | 13.4  | 0.0   | U     | COG3451                 | Type IV secretory pathway, VirB4 components                                                                                           |
| CspM6211845 CDS CDS  | 0.1     | 14.2  | 0.0   | U     | COG3451                 | Type IV secretory pathway, VirB4 components                                                                                           |
| Dfor2038 CDS CDS     | 0.1     | 14.2  | 0.0   | U     | COG3451                 | Type IV secretory pathway, VirB4 components                                                                                           |
| Ceut2222 CDS CDS     | 0.1     | 14.2  | 0.0   | U     | COG3451                 | Type IV secretory pathway, VirB4 components                                                                                           |
| Cbol3082 CDS CDS     | 0.1     | 16.5  | 0.0   | U     | COG3451                 | Type IV secretory pathway, VirB4 components                                                                                           |
| Cnex2291 CDS CDS     | 0.1     | 24.2  | 0.0   | U     | COG3451                 | Type IV secretory pathway, VirB4 components                                                                                           |
| Rbro1718 CDS CDS     | 0.1     | 24.5  | 0.0   | U     | COG3451                 | Type IV secretory pathway, VirB4 components                                                                                           |
| Cbol3071 CDS CDS     | 0.2     | 57.5  | 0.0   | U     | COG3505                 | Type IV secretory pathway, VirD4 components                                                                                           |
| Csci3146 CDS CDS     | 0.1     | 35.4  | 0.0   | U     | COG3451                 | Type IV secretory pathway, VirB4 components                                                                                           |
| Rbro0062 CDS CDS     | 0.5     | 226.3 | 0.0   | U     | COG3451                 | Type IV secretory pathway, VirB4 components                                                                                           |
| Acol2774 CDS CDS     | 0.1     | 62.3  | 0.0   | U     | COG3451                 | Type IV secretory pathway, VirB4 components                                                                                           |
| TS29Bac02191 CDS CDS | 4.5     | 0.5   | 29.8  | U D W | COG1674 COG5295         | DNA segregation ATPase FtsK/SpoIIIE and related proteins/Autotransporter adhesion                                                     |
| Msmi740474 CDS CDS   | 13.0    | 3.0   | 14.3  | U W   | COG3291 COG3210 COG5295 | FOG: PKD repeat/Large exoproteins involved in heme utilization or adhesion/Autotransporter adhesion                                   |
| TS28Rum01438 CDS CDS | 2,466.0 | 24.7  | 330.6 | V     | COG0534                 | Na <sup>+</sup> -driven multidrug efflux pump                                                                                         |
| Even0818 CDS CDS     | 50.0    | 1.0   | 165.3 | V     | COG0577                 | ABC-type antimicrobial peptide transport system, permease component                                                                   |
| TS28Met1299 CDS CDS  | 396.0   | 12.0  | 109.1 | V     | COG3587                 | Restriction endonuclease                                                                                                              |
| Robe2548 CDS CDS     | 7.0     | 0.5   | 46.3  | V     | COG1131 COG4152         | ABC-type multidrug transport system, ATPase component ABC-type uncharacterized transport system, ATPase component                     |
| Msmi740122 CDS CDS   | 4.1     | 0.3   | 40.2  | V     | COG0534                 | Na <sup>+</sup> -driven multidrug efflux pump                                                                                         |
| Msmi741123 CDS CDS   | 3.0     | 0.3   | 39.7  | V     | COG0842                 | ABC-type multidrug transport system, permease component                                                                               |
| FpraM2121867 CDS CDS | 5.5     | 0.5   | 36.4  | V     | COG0534                 | Na <sup>+</sup> -driven multidrug efflux pump                                                                                         |
| RintL13181 CDS CDS   | 9.0     | 1.0   | 29.8  | V     | COG1132                 | ABC-type multidrug transport system, ATPase and permease components                                                                   |
| Bryfor2551 CDS CDS   | 7.5     | 1.0   | 24.8  | V     | COG1132                 | ABC-type multidrug transport system, ATPase and permease components                                                                   |
| Bova1791 CDS CDS     | 6.5     | 1.0   | 21.5  | V     | COG0534                 | Na <sup>+</sup> -driven multidrug efflux pump                                                                                         |
| Even0349 CDS CDS     | 6.0     | 1.0   | 19.8  | V     | COG1132                 | ABC-type multidrug transport system, ATPase and permease components                                                                   |
| TS29Fae05553 CDS CDS | 6.0     | 1.0   | 19.8  | V     | COG1132                 | ABC-type multidrug transport system, ATPase and permease components                                                                   |
| Casp3525 CDS CDS     | 6.0     | 1.0   | 19.8  | V     | COG0841                 | Cation/multidrug efflux pump                                                                                                          |
| Pmer1810 CDS CDS     | 12.0    | 2.0   | 19.8  | V     | COG0841                 | Cation/multidrug efflux pump                                                                                                          |
| TS29Rum14589 CDS CDS | 6.0     | 1.0   | 19.8  | V     | COG0732                 | Restriction endonuclease S subunits                                                                                                   |
| TS29Fae01573 CDS CDS | 1.7     | 0.3   | 16.5  | V     | COG1136                 | ABC-type antimicrobial peptide transport system, ATPase component                                                                     |
| Bryfor4221 CDS CDS   | 5.0     | 1.0   | 16.5  | V     | COG1132                 | ABC-type multidrug transport system, ATPase and permease components                                                                   |
| TS29Fae03472 CDS CDS | 5.0     | 1.0   | 16.5  | V     | COG0732                 | Restriction endonuclease S subunits                                                                                                   |
| TS28Bac3367 CDS CDS  | 2.5     | 0.5   | 16.5  | V     | COG0577                 | ABC-type antimicrobial peptide transport system, permease component                                                                   |
| TS29Fae09897 CDS CDS | 2.5     | 0.5   | 16.5  | V     | COG0534                 | Na <sup>+</sup> -driven multidrug efflux pump                                                                                         |
| TS28Bac4876 CDS CDS  | 29.0    | 6.0   | 16.0  | V     | COG0732                 | Restriction endonuclease S subunits                                                                                                   |
| Msmi750115 CDS CDS   | 4.8     | 1.0   | 15.7  | V     | COG0534                 | Na <sup>+</sup> -driven multidrug efflux pump                                                                                         |
| BactD24599 CDS CDS   | 2.2     | 0.5   | 14.3  | V     | COG0842                 | ABC-type multidrug transport system, permease component                                                                               |
| Bova1144 CDS CDS     | 4.0     | 1.0   | 13.2  | V     | COG1136 COG0577         | ABC-type antimicrobial peptide transport system, ATPase component ABC-type antimicrobial peptide transport system, permease component |
| Casp5521 CDS CDS     | 4.0     | 1.0   | 13.2  | V     | COG1136                 | ABC-type antimicrobial peptide transport system, ATPase component                                                                     |
| Hfil2705 CDS CDS     | 4.0     | 1.0   | 13.2  | V     | COG1132                 | ABC-type multidrug transport system, ATPase and permease components                                                                   |
| Pmer3426 CDS CDS     | 12.0    | 3.0   | 13.2  | V     | COG0534                 | Na <sup>+</sup> -driven multidrug efflux pump                                                                                         |
| BactD10601 CDS CDS   | 2.0     | 0.5   | 13.2  | V     | COG0534                 | Na <sup>+</sup> -driven multidrug efflux pump                                                                                         |
| Even0909 CDS CDS     | 11.0    | 3.0   | 12.1  | V     | COG1132                 | ABC-type multidrug transport system, ATPase and permease components                                                                   |
| Bste0127 CDS CDS     | 14.5    | 4.0   | 12.0  | V     | COG1136 COG0577         | ABC-type antimicrobial peptide transport system, ATPase component ABC-type antimicrobial peptide transport system, permease component |
| TS28Bac1132 CDS CDS  | 14.0    | 4.0   | 11.6  | V     | COG1136 COG0577         | ABC-type antimicrobial peptide transport system, ATPase component ABC-type antimicrobial peptide transport system, permease component |
| Pmer0214 CDS CDS     | 5.0     | 1.5   | 11.0  | V     | COG0577                 | ABC-type antimicrobial peptide transport system, permease component                                                                   |
| TS29Rum00794 CDS CDS | 23.0    | 7.0   | 10.9  | V     | COG2367                 | Beta-lactamase class A                                                                                                                |
| TS28Eub0144 CDS CDS  | 49.0    | 15.0  | 10.8  | V     | COG0286                 | Type I restriction-modification system methyltransferase subunit                                                                      |

|                      |     |       |      |   |                 |                                                                                                                    |
|----------------------|-----|-------|------|---|-----------------|--------------------------------------------------------------------------------------------------------------------|
| TS28Bac0944 CDS CDS  | 6.5 | 2.0   | 10.7 | V | COG0841         | Cation/multidrug efflux pump                                                                                       |
| TS28Eub8425 CDS CDS  | 1.3 | 44.7  | 0.1  | V | COG0534         | Na <sup>+</sup> -driven multidrug efflux pump                                                                      |
| Ehal2443 CDS CDS     | 0.5 | 17.5  | 0.1  | V | COG0534         | Na <sup>+</sup> -driven multidrug efflux pump                                                                      |
| TS28Bac7466 CDS CDS  | 1.0 | 36.5  | 0.1  | V | COG0577         | ABC-type antimicrobial peptide transport system, permease component                                                |
| TS28Eub3905 CDS CDS  | 1.0 | 38.0  | 0.1  | V | COG1136         | ABC-type antimicrobial peptide transport system, ATPase component                                                  |
| TS28Fae16454 CDS CDS | 1.0 | 38.0  | 0.1  | V | COG0610         | Type I site-specific restriction-modification system, R (restriction) subunit and related helicases                |
| TS28Clo10877 CDS CDS | 1.5 | 57.5  | 0.1  | V | COG0577         | ABC-type antimicrobial peptide transport system, permease component                                                |
| TS28Rum00725 CDS CDS | 0.5 | 19.5  | 0.1  | V | COG1131 COG4152 | ABC-type multidrug transport system, ATPase component ABC-type uncharacterized transport system, ATPase component  |
| Msmi751116 CDS CDS   | 0.3 | 9.8   | 0.1  | V | COG0534         | Na <sup>+</sup> -driven multidrug efflux pump                                                                      |
| TS28Eub8422 CDS CDS  | 1.3 | 53.3  | 0.1  | V | COG0534         | Na <sup>+</sup> -driven multidrug efflux pump                                                                      |
| TS28Clo1250 CDS CDS  | 4.0 | 160.5 | 0.1  | V | COG2348         | Uncharacterized protein involved in methicillin resistance                                                         |
| TS29Rum17071 CDS CDS | 2.0 | 81.0  | 0.1  | V | COG1132         | ABC-type multidrug transport system, ATPase and permease components                                                |
| TS28Fae12157 CDS CDS | 2.0 | 82.0  | 0.1  | V | COG0534         | Na <sup>+</sup> -driven multidrug efflux pump                                                                      |
| TS28Bif2291 CDS CDS  | 1.5 | 62.5  | 0.1  | V | COG0610         | Type I site-specific restriction-modification system, R (restriction) subunit and related helicases                |
| TS29Fae02252 CDS CDS | 1.0 | 41.8  | 0.1  | V | COG0286         | Type I restriction-modification system methyltransferase subunit                                                   |
| TS28Rum09994 CDS CDS | 1.0 | 42.0  | 0.1  | V | COG1136         | ABC-type antimicrobial peptide transport system, ATPase component                                                  |
| TS28Dor0838 CDS CDS  | 0.5 | 21.0  | 0.1  | V | COG0534         | Na <sup>+</sup> -driven multidrug efflux pump                                                                      |
| TS28Fae17020 CDS CDS | 0.5 | 21.0  | 0.1  | V | COG0534         | Na <sup>+</sup> -driven multidrug efflux pump                                                                      |
| TS28Clo1720 CDS CDS  | 2.0 | 89.5  | 0.1  | V | COG4845         | Chloramphenicol O-acetyltransferase                                                                                |
| TS28Clo01668 CDS CDS | 7.0 | 314.0 | 0.1  | V | COG1136         | ABC-type antimicrobial peptide transport system, ATPase component                                                  |
| TS28Rum16352 CDS CDS | 1.0 | 47.0  | 0.1  | V | COG1136         | ABC-type antimicrobial peptide transport system, ATPase component                                                  |
| TS28Clo00560 CDS CDS | 6.0 | 296.0 | 0.1  | V | COG0577         | ABC-type antimicrobial peptide transport system, permease component                                                |
| TS28Bac0364 CDS CDS  | 0.5 | 25.0  | 0.1  | V | COG0841         | Cation/multidrug efflux pump                                                                                       |
| TS28Fae21402 CDS CDS | 1.0 | 50.5  | 0.1  | V | COG1132         | ABC-type multidrug transport system, ATPase and permease components                                                |
| Even0576 CDS CDS     | 2.5 | 127.5 | 0.1  | V | COG0577         | ABC-type antimicrobial peptide transport system, permease component                                                |
| TS28Dor3087 CDS CDS  | 0.5 | 26.0  | 0.1  | V | COG1680         | Beta-lactamase class C and other penicillin binding proteins                                                       |
| TS28Fae17738 CDS CDS | 1.0 | 53.0  | 0.1  | V | COG1136         | ABC-type antimicrobial peptide transport system, ATPase component                                                  |
| TS28Fae18163 CDS CDS | 1.5 | 84.0  | 0.1  | V | COG0534         | Na <sup>+</sup> -driven multidrug efflux pump                                                                      |
| TS28Clo01224 CDS CDS | 3.0 | 171.0 | 0.1  | V | COG1132         | ABC-type multidrug transport system, ATPase and permease components                                                |
| Bdor0611 CDS CDS     | 0.3 | 19.0  | 0.1  | V | COG0841         | Cation/multidrug efflux pump                                                                                       |
| TS29Fae09506 CDS CDS | 0.5 | 29.0  | 0.1  | V | COG0534         | Na <sup>+</sup> -driven multidrug efflux pump                                                                      |
| FpraM2121439 CDS CDS | 2.0 | 116.8 | 0.1  | V | COG0577         | ABC-type antimicrobial peptide transport system, permease component                                                |
| TS28Eub4121 CDS CDS  | 1.0 | 62.0  | 0.1  | V | COG0534         | Na <sup>+</sup> -driven multidrug efflux pump                                                                      |
| TS28Clo00788 CDS CDS | 3.0 | 187.0 | 0.1  | V | COG0534         | Na <sup>+</sup> -driven multidrug efflux pump                                                                      |
| Ccom0777 CDS CDS     | 0.2 | 10.5  | 0.1  | V | COG0577         | ABC-type antimicrobial peptide transport system, permease component                                                |
| TS28Rum01570 CDS CDS | 0.5 | 31.5  | 0.1  | V | COG0488 COG0534 | ATPase components of ABC transporters with duplicated ATPase domains Na <sup>+</sup> -driven multidrug efflux pump |
| TS29Clo4619 CDS CDS  | 1.5 | 101.0 | 0.0  | V | COG0577         | ABC-type antimicrobial peptide transport system, permease component                                                |
| Dlon0974 CDS CDS     | 0.4 | 30.3  | 0.0  | V | COG0577         | ABC-type antimicrobial peptide transport system, permease component                                                |
| TS28Fae07372 CDS CDS | 1.0 | 73.0  | 0.0  | V | COG0610         | Type I site-specific restriction-modification system, R (restriction) subunit and related helicases                |
| TS29Bif3552 CDS CDS  | 0.3 | 26.4  | 0.0  | V | COG0577         | ABC-type antimicrobial peptide transport system, permease component                                                |
| RintL13838 CDS CDS   | 2.0 | 159.5 | 0.0  | V | COG0577         | ABC-type antimicrobial peptide transport system, permease component                                                |
| TS28Fae20830 CDS CDS | 1.5 | 123.5 | 0.0  | V | COG1136         | ABC-type antimicrobial peptide transport system, ATPase component                                                  |
| TS28Met1736 CDS CDS  | 0.3 | 21.3  | 0.0  | V | COG0534         | Na <sup>+</sup> -driven multidrug efflux pump                                                                      |
| TS29Fae05124 CDS CDS | 0.5 | 45.0  | 0.0  | V | COG1131         | ABC-type multidrug transport system, ATPase component                                                              |
| Robe3755 CDS CDS     | 0.3 | 31.5  | 0.0  | V | COG0610         | Type I site-specific restriction-modification system, R (restriction) subunit and related helicases                |
| CspL21209 CDS CDS    | 0.4 | 41.1  | 0.0  | V | COG0577         | ABC-type antimicrobial peptide transport system, permease component                                                |
| TS28Fae18246 CDS CDS | 0.7 | 67.0  | 0.0  | V | COG0534         | Na <sup>+</sup> -driven multidrug efflux pump                                                                      |
| TS28Eub4375 CDS CDS  | 0.5 | 53.0  | 0.0  | V | COG1968         | Uncharacterized bacitracin resistance protein                                                                      |
| TS28Fae12266 CDS CDS | 0.5 | 54.0  | 0.0  | V | COG0534         | Na <sup>+</sup> -driven multidrug efflux pump                                                                      |
| TS28Bif2178 CDS CDS  | 0.3 | 39.3  | 0.0  | V | COG0577         | ABC-type antimicrobial peptide transport system, permease component                                                |
| FpraM2122471 CDS CDS | 1.0 | 118.2 | 0.0  | V | COG0577         | ABC-type antimicrobial peptide transport system, permease component                                                |
| Ccom2341 CDS CDS     | 1.0 | 123.0 | 0.0  | V | COG1002         | Type II restriction enzyme, methylase subunits                                                                     |
| Ehal1055 CDS CDS     | 0.2 | 24.3  | 0.0  | V | COG0577         | ABC-type antimicrobial peptide transport system, permease component                                                |
| TS28Eub6501 CDS CDS  | 0.5 | 73.0  | 0.0  | V | COG0534         | Na <sup>+</sup> -driven multidrug efflux pump                                                                      |
| TS28Eub8030 CDS CDS  | 0.5 | 73.5  | 0.0  | V | COG0534         | Na <sup>+</sup> -driven multidrug efflux pump                                                                      |
| Eeli0031 CDS CDS     | 0.4 | 78.6  | 0.0  | V | COG0577         | ABC-type antimicrobial peptide transport system, permease component                                                |
| Robe3151 CDS CDS     | 0.4 | 89.1  | 0.0  | V | COG0577         | ABC-type antimicrobial peptide transport system, permease component                                                |
| TS28Clo00915 CDS CDS | 1.0 | 256.0 | 0.0  | V | COG1132         | ABC-type multidrug transport system, ATPase and permease components                                                |



|                               |       |       |       |     |                         |                                                                                                                                                                       |
|-------------------------------|-------|-------|-------|-----|-------------------------|-----------------------------------------------------------------------------------------------------------------------------------------------------------------------|
| TS28Eub3906 CDS CDS           | 0.5   | 193.5 | 0.0   | V   | COG0577                 | ABC-type antimicrobial peptide transport system, permease component                                                                                                   |
| TS28Rum01059 CDS CDS          | 0.3   | 161.5 | 0.0   | V   | COG0610                 | Type I site-specific restriction-modification system, R (restriction) subunit and related helicases                                                                   |
| Robe3150 CDS CDS              | 0.7   | 67.5  | 0.0   | V Q | COG1136 COG4181         | ABC-type antimicrobial peptide transport system, ATPase component Predicted ABC-type transport system involved in lysophospholipase L1 biosynthesis, ATPase component |
| TS28Fae15596 CDS CDS          | 0.5   | 59.0  | 0.0   | R   | COG0073                 | EMAP domain                                                                                                                                                           |
| Msmi741535 CDS CDS            | 7.8   | 0.5   | 51.8  | R   | COG0110                 | Acetyltransferase (isoleucine patch superfamily)                                                                                                                      |
| Bdor2243 CDS CDS              | 12.1  | 4.0   | 10.0  | R   | COG0217                 | Uncharacterized conserved protein                                                                                                                                     |
| TS28Eub4538 CDS CDS           | 0.3   | 24.0  | 0.0   | R   | COG0217                 | Uncharacterized conserved protein                                                                                                                                     |
| TS28Fae07816 CDS CDS          | 0.2   | 9.0   | 0.1   | R   | COG0218                 | Predicted GTPase                                                                                                                                                      |
| Bste2188 CDS CDS              | 5.0   | 0.5   | 33.1  | R   | COG0312                 | Predicted Zn-dependent proteases and their inactivated homologs                                                                                                       |
| Ebif1781 CDS CDS              | 6.0   | 1.0   | 19.8  | R   | COG0312                 | Predicted Zn-dependent proteases and their inactivated homologs                                                                                                       |
| Msmi750752 CDS CDS            | 7.9   | 1.5   | 17.4  | R   | COG0312                 | Predicted Zn-dependent proteases and their inactivated homologs                                                                                                       |
| Msmi740927 CDS CDS            | 7.9   | 2.0   | 13.1  | R   | COG0312                 | Predicted Zn-dependent proteases and their inactivated homologs                                                                                                       |
| Pmer3547 CDS CDS              | 20.0  | 6.0   | 11.0  | R   | COG0312                 | Predicted Zn-dependent proteases and their inactivated homologs                                                                                                       |
| BVU1837 CDS methy transferase | 29.7  | 2.0   | 49.1  | R   | COG0313                 | Predicted methyltransferases                                                                                                                                          |
| Bdor2872 CDS CDS              | 17.7  | 3.0   | 19.5  | R   | COG0313                 | Predicted methyltransferases                                                                                                                                          |
| Pmer2668 CDS CDS              | 8.0   | 2.0   | 13.2  | R   | COG0313                 | Predicted methyltransferases                                                                                                                                          |
| Bste0572 CDS CDS              | 12.0  | 2.0   | 19.8  | R   | COG0325                 | Predicted enzyme with a TIM-barrel fold                                                                                                                               |
| TS28Met1314 CDS CDS           | 5.5   | 1.5   | 12.1  | R   | COG0375                 | Zn finger protein HypA/HybF (possibly regulating hydrogenase expression)                                                                                              |
| TS28Bac6214 CDS CDS           | 0.5   | 31.2  | 0.1   | R   | COG0388                 | Predicted amidohydrolase                                                                                                                                              |
| TS28Clo0936 CDS CDS           | 1.0   | 60.0  | 0.1   | R   | COG0398                 | Uncharacterized conserved protein                                                                                                                                     |
| ShiapsD90733 CDS CDS          | 17.0  | 0.5   | 112.4 | R   | COG0457                 | FOG: TPR repeat                                                                                                                                                       |
| BactD11202 CDS CDS            | 2.7   | 0.3   | 26.5  | R   | COG0457                 | FOG: TPR repeat                                                                                                                                                       |
| TS29Bac00353 CDS CDS          | 2.7   | 0.3   | 26.5  | R   | COG0457                 | FOG: TPR repeat                                                                                                                                                       |
| Pmer1450 CDS CDS              | 29.0  | 5.0   | 19.2  | R   | COG0457                 | FOG: TPR repeat                                                                                                                                                       |
| TS28Ali0823 CDS CDS           | 46.5  | 12.0  | 12.8  | R   | COG0457                 | FOG: TPR repeat                                                                                                                                                       |
| Bdor2397 CDS CDS              | 30.5  | 10.0  | 10.1  | R   | COG0457                 | FOG: TPR repeat                                                                                                                                                       |
| Aput1126 CDS CDS              | 13.5  | 4.0   | 11.2  | R   | COG0457 COG0666         | FOG: TPR repeat FOG: Ankyrin repeat                                                                                                                                   |
| b3706 CDS GTPase              | 5.0   | 1.0   | 16.5  | R   | COG0486                 | Predicted GTPase                                                                                                                                                      |
| TS29Fae08493 CDS CDS          | 0.3   | 8.5   | 0.1   | R   | COG0486                 | Predicted GTPase                                                                                                                                                      |
| TS28Rum13685 CDS CDS          | 1.0   | 53.0  | 0.1   | R   | COG0486                 | Predicted GTPase                                                                                                                                                      |
| TS28Fae12679 CDS CDS          | 0.3   | 36.0  | 0.0   | R   | COG0486                 | Predicted GTPase                                                                                                                                                      |
| Cbol3211 CDS CDS              | 7.0   | 1.0   | 23.1  | R   | COG0488                 | ATPase components of ABC transporters with duplicated ATPase domains                                                                                                  |
| Bdor3253 CDS CDS              | 32.0  | 10.2  | 10.4  | R   | COG0488                 | ATPase components of ABC transporters with duplicated ATPase domains                                                                                                  |
| Dlon0788 CDS CDS              | 1.0   | 35.0  | 0.1   | R   | COG0488                 | ATPase components of ABC transporters with duplicated ATPase domains                                                                                                  |
| TS28Bac1770 CDS CDS           | 0.3   | 10.0  | 0.1   | R   | COG0488                 | ATPase components of ABC transporters with duplicated ATPase domains                                                                                                  |
| TS28Fae10321 CDS CDS          | 0.3   | 22.3  | 0.0   | R   | COG0488                 | ATPase components of ABC transporters with duplicated ATPase domains                                                                                                  |
| TS28Bif2589 CDS CDS           | 0.3   | 36.3  | 0.0   | R   | COG0488                 | ATPase components of ABC transporters with duplicated ATPase domains                                                                                                  |
| TS28Bif4112 CDS CDS           | 0.3   | 44.7  | 0.0   | R   | COG0488                 | ATPase components of ABC transporters with duplicated ATPase domains                                                                                                  |
| Aput1104 CDS CDS              | 4.0   | 1.0   | 13.2  | R   | COG0496                 | Predicted acid phosphatase                                                                                                                                            |
| Ehal2227 CDS CDS              | 5.0   | 0.5   | 33.1  | R   | COG0517                 | FOG: CBS domain                                                                                                                                                       |
| Acod0213 CDS CDS              | 4.0   | 1.0   | 13.2  | R   | COG0517                 | FOG: CBS domain                                                                                                                                                       |
| Msmi751552 CDS CDS            | 4.0   | 1.3   | 10.6  | R   | COG0517                 | FOG: CBS domain                                                                                                                                                       |
| TS28Fae08593 CDS CDS          | 38.0  | 12.0  | 10.5  | R   | COG0517                 | FOG: CBS domain                                                                                                                                                       |
| TS28Col1732 CDS CDS           | 1.0   | 42.0  | 0.1   | R   | COG0517                 | FOG: CBS domain                                                                                                                                                       |
| TS29Rum11606 CDS CDS          | 1.0   | 42.5  | 0.1   | R   | COG0523                 | Putative GTPases (G3E family)                                                                                                                                         |
| TS28Col0951 CDS CDS           | 0.5   | 23.0  | 0.1   | R   | COG0523                 | Putative GTPases (G3E family)                                                                                                                                         |
| TS29Fae09409 CDS CDS          | 2.5   | 0.5   | 16.5  | R   | COG0535                 | Predicted Fe-S oxidoreductases                                                                                                                                        |
| TS29Rum19807 CDS CDS          | 0.5   | 18.0  | 0.1   | R   | COG0535 COG0641         | Predicted Fe-S oxidoreductases Arylsulfatase regulator (Fe-S oxidoreductase)                                                                                          |
| TS28Eub8072 CDS CDS           | 1.5   | 56.0  | 0.1   | R   | COG0535 COG4001 COG0641 | Predicted Fe-S oxidoreductases Predicted metal-binding protein Arylsulfatase regulator (Fe-S oxidoreductase)                                                          |
| Svar1269 CDS CDS              | 4.0   | 1.0   | 13.2  | R   | COG0536                 | Predicted GTPase                                                                                                                                                      |
| TS29Bif3653 CDS CDS           | 0.3   | 11.5  | 0.1   | R   | COG0536                 | Predicted GTPase                                                                                                                                                      |
| TS28Bif2044 CDS CDS           | 0.3   | 11.5  | 0.1   | R   | COG0536                 | Predicted GTPase                                                                                                                                                      |
| TS29Rum12440 CDS CDS          | 7.0   | 1.0   | 23.1  | R   | COG0546                 | Predicted phosphatases                                                                                                                                                |
| TS29Rum07641 CDS CDS          | 1.3   | 0.3   | 13.2  | R   | COG0546                 | Predicted phosphatases                                                                                                                                                |
| TS28Bac6996 CDS CDS           | 0.3   | 36.5  | 0.0   | R   | COG0546                 | Predicted phosphatases                                                                                                                                                |
| TS28Bac2640 CDS CDS           | 5.0   | 1.0   | 16.5  | R   | COG0561 COG4696         | Predicted hydrolases of the HAD superfamily Uncharacterized protein conserved in bacteria                                                                             |
| Rumhvd3310 CDS CDS            | 4.0   | 1.0   | 13.2  | R   | COG0595                 | Predicted hydrolase of the metallo-beta-lactamase superfamily                                                                                                         |
| TS28Clo01541 CDS CDS          | 7.0   | 254.5 | 0.1   | R   | COG0595                 | Predicted hydrolase of the metallo-beta-lactamase superfamily                                                                                                         |
| TS28Rum12672 CDS CDS          | 1.0   | 42.0  | 0.1   | R   | COG0595                 | Predicted hydrolase of the metallo-beta-lactamase superfamily                                                                                                         |
| TS28Clo0946 CDS CDS           | 2.0   | 190.0 | 0.0   | R   | COG0595                 | Predicted hydrolase of the metallo-beta-lactamase superfamily                                                                                                         |
| TS28Dor0699 CDS CDS           | 0.5   | 17.5  | 0.1   | R   | COG0596                 | Predicted hydrolases or acyltransferases (alpha/beta hydrolase superfamily)                                                                                           |
| TS29Bac03150 CDS CDS          | 1.5   | 0.3   | 14.9  | R   | COG0612                 | Predicted Zn-dependent peptidases                                                                                                                                     |
| TS28Fae12384 CDS CDS          | 25.3  | 6.0   | 14.0  | R   | COG0612                 | Predicted Zn-dependent peptidases                                                                                                                                     |
| Even1555 CDS CDS              | 4.0   | 1.0   | 13.2  | R   | COG0612                 | Predicted Zn-dependent peptidases                                                                                                                                     |
| Bcap1657 CDS CDS              | 7.0   | 2.0   | 11.6  | R   | COG0612                 | Predicted Zn-dependent peptidases                                                                                                                                     |
| TS28Ali1352 CDS CDS           | 251.0 | 72.0  | 11.5  | R   | COG0612                 | Predicted Zn-dependent peptidases                                                                                                                                     |
| Clep0333 CDS CDS              | 7.9   | 1.7   | 15.7  | R   | COG0613                 | Predicted metal-dependent phosphoesterases (PHP family)                                                                                                               |
| Robe3650 CDS CDS              | 4.5   | 0.5   | 29.8  | R   | COG0628                 | Predicted permease                                                                                                                                                    |
| Msmi740750 CDS CDS            | 3.3   | 0.7   | 16.5  | R   | COG0628                 | Predicted permease                                                                                                                                                    |
| TS29Fae08388 CDS CDS          | 4.5   | 1.0   | 14.9  | R   | COG0628                 | Predicted permease                                                                                                                                                    |
| TS28Eub8994 CDS CDS           | 0.5   | 17.0  | 0.1   | R   | COG0628                 | Predicted permease                                                                                                                                                    |

|                         |      |       |       |   |                         |                                                                                                                                            |
|-------------------------|------|-------|-------|---|-------------------------|--------------------------------------------------------------------------------------------------------------------------------------------|
| TS28Clo00715 CDS CDS    | 1.0  | 166.0 | 0.0   | R | COG0628                 | Predicted permease                                                                                                                         |
| TS28Fae02281 CDS CDS    | 0.5  | 22.0  | 0.1   | R | COG0641                 | Arv/sulfatase regulator (Fe-S oxidoreductase)                                                                                              |
| Ehal1041 CDS CDS        | 3.0  | 0.5   | 19.8  | R | COG0655                 | Multimeric flavodoxin WrB                                                                                                                  |
| TS28Met0271 CDS CDS     | 3.3  | 1.0   | 10.7  | R | COG0655                 | Multimeric flavodoxin WrB                                                                                                                  |
| Rlac0013 CDS CDS        | 2.8  | 94.4  | 0.1   | R | COG0655                 | Multimeric flavodoxin WrB                                                                                                                  |
| TS28Met1589 CDS CDS     | 0.3  | 11.0  | 0.1   | R | COG0655                 | Multimeric flavodoxin WrB                                                                                                                  |
| TS28Eub4370 CDS CDS     | 1.0  | 80.0  | 0.0   | R | COG0655                 | Multimeric flavodoxin WrB                                                                                                                  |
| Robe2068 CDS CDS        | 6.0  | 1.0   | 19.8  | R | COG0658 COG2333         | Predicted membrane metal-binding protein Predicted hydrolase (metallo-beta-lactamase superfamily)                                          |
| Bdor0468 CDS CDS        | 0.3  | 17.5  | 0.1   | R | COG0658 COG2333         | Predicted membrane metal-binding protein Predicted hydrolase (metallo-beta-lactamase superfamily)                                          |
| Dlon1005 CDS CDS        | 7.5  | 2.0   | 12.4  | R | COG0661                 | Predicted unusual protein kinase                                                                                                           |
| TS28Clo00730 CDS CDS    | 5.0  | 185.0 | 0.1   | R | COG0661                 | Predicted unusual protein kinase                                                                                                           |
| Msmi740300 CDS CDS      | 5.5  | 0.8   | 24.3  | R | COG0663                 | Carbonic anhydrases/acetyltransferases, isoleucine patch superfamily                                                                       |
| TS29Clo4769 CDS CDS     | 0.5  | 49.5  | 0.0   | R | COG0666                 | FOG: Ankyrin repeat                                                                                                                        |
| TS29Dor0946 CDS CDS     | 9.0  | 1.0   | 29.8  | R | COG0673                 | Predicted dehydrogenases and related proteins                                                                                              |
| TS29Fae04584 CDS CDS    | 3.5  | 0.5   | 23.1  | R | COG0673                 | Predicted dehydrogenases and related proteins                                                                                              |
| Pmer2748 CDS CDS        | 30.0 | 5.0   | 19.8  | R | COG0673                 | Predicted dehydrogenases and related proteins                                                                                              |
| Pmer1779 CDS CDS        | 11.5 | 2.0   | 19.0  | R | COG0673                 | Predicted dehydrogenases and related proteins                                                                                              |
| Bova2380 CDS CDS        | 8.0  | 1.5   | 17.6  | R | COG0673                 | Predicted dehydrogenases and related proteins                                                                                              |
| BactD21105 CDS CDS      | 6.0  | 1.5   | 13.2  | R | COG0673                 | Predicted dehydrogenases and related proteins                                                                                              |
| Pmer2911 CDS CDS        | 19.0 | 6.0   | 10.5  | R | COG0673                 | Predicted dehydrogenases and related proteins                                                                                              |
| Pmer1244 CDS CDS        | 9.5  | 2.0   | 15.7  | R | COG0705 COG3582         | Uncharacterized membrane protein (homolog of Drosophila rhomboid) Predicted nucleic acid binding protein containing the AN1-type Zn-finger |
| TS29Fae03451 CDS CDS    | 7.0  | 1.0   | 23.1  | R | COG0714                 | MoxR-like ATPases                                                                                                                          |
| TS28Fae08998 CDS CDS    | 2.0  | 68.5  | 0.1   | R | COG0714                 | MoxR-like ATPases                                                                                                                          |
| TS28Rum12513 CDS CDS    | 0.5  | 23.8  | 0.1   | R | COG0714                 | MoxR-like ATPases                                                                                                                          |
| Bxyl0536 CDS CDS        | 21.1 | 0.5   | 139.7 | R | COG0724                 | RNA-binding proteins (RRM domain)                                                                                                          |
| TS29Bac00560 CDS CDS    | 20.9 | 0.5   | 138.0 | R | COG0724                 | RNA-binding proteins (RRM domain)                                                                                                          |
| Bste3239 CDS CDS        | 30.5 | 1.0   | 100.9 | R | COG0724                 | RNA-binding proteins (RRM domain)                                                                                                          |
| TS29Bac02527 CDS CDS    | 35.0 | 2.0   | 57.9  | R | COG0724                 | RNA-binding proteins (RRM domain)                                                                                                          |
| PRABACTJOHN2801 CDS CDS | 12.0 | 1.0   | 39.7  | R | COG0724                 | RNA-binding proteins (RRM domain)                                                                                                          |
| Bste0102 CDS CDS        | 70.0 | 6.0   | 38.6  | R | COG0724                 | RNA-binding proteins (RRM domain)                                                                                                          |
| Pmer1512 CDS CDS        | 2.2  | 0.5   | 14.3  | R | COG0724                 | RNA-binding proteins (RRM domain)                                                                                                          |
| Bdor2438 CDS CDS        | 11.5 | 3.0   | 12.7  | R | COG0724                 | RNA-binding proteins (RRM domain)                                                                                                          |
| TS28Par0076 CDS CDS     | 5.2  | 1.5   | 11.4  | R | COG0724                 | RNA-binding proteins (RRM domain)                                                                                                          |
| Bxyl4341 CDS CDS        | 1.6  | 0.5   | 10.9  | R | COG0724                 | RNA-binding proteins (RRM domain)                                                                                                          |
| BactD10044 CDS CDS      | 1.6  | 0.5   | 10.9  | R | COG0724                 | RNA-binding proteins (RRM domain)                                                                                                          |
| TS29Dor1996 CDS CDS     | 4.0  | 1.0   | 13.2  | R | COG0733                 | Na+-dependent transporters of the SNF family                                                                                               |
| TS28Ali1650 CDS CDS     | 1.0  | 35.0  | 0.1   | R | COG0733                 | Na+-dependent transporters of the SNF family                                                                                               |
| TS28Eub5082 CDS CDS     | 0.3  | 70.0  | 0.0   | R | COG0733                 | Na+-dependent transporters of the SNF family                                                                                               |
| Bdor1791 CDS CDS        | 11.0 | 1.0   | 36.4  | R | COG0759                 | Uncharacterized conserved protein                                                                                                          |
| Eeli1313 CDS CDS        | 7.0  | 1.0   | 23.1  | R | COG0779                 | Uncharacterized protein conserved in bacteria                                                                                              |
| TS29Rum19927 CDS CDS    | 9.0  | 2.0   | 14.9  | R | COG0779                 | Uncharacterized protein conserved in bacteria                                                                                              |
| TS28Fae06307 CDS CDS    | 19.0 | 4.0   | 15.7  | R | COG0790                 | FOG: TPR repeat, SEL1 subfamily                                                                                                            |
| TS28Fae13357 CDS CDS    | 53.0 | 15.0  | 11.7  | R | COG0790 COG4249 COG2849 | FOG: TPR repeat, SEL1 subfamily Uncharacterized protein containing caspase domain Uncharacterized protein conserved in bacteria            |
| Bdor3683 CDS CDS        | 3.5  | 0.3   | 34.7  | R | COG0820                 | Predicted Fe-S-cluster redox enzyme                                                                                                        |
| Msmi750558 CDS CDS      | 8.7  | 2.2   | 13.2  | R | COG1011                 | Predicted hydrolase (HAD superfamily)                                                                                                      |
| Rtor1309 CDS CDS        | 19.0 | 5.0   | 12.6  | R | COG1011                 | Predicted hydrolase (HAD superfamily)                                                                                                      |
| TS28Fae00613 CDS CDS    | 1.0  | 40.5  | 0.1   | R | COG1026                 | Predicted Zn-dependent peptidases, insulinase-like                                                                                         |
| CspS21842 CDS CDS       | 0.5  | 38.0  | 0.0   | R | COG1026                 | Predicted Zn-dependent peptidases, insulinase-like                                                                                         |
| TS28Eub4362 CDS CDS     | 1.0  | 80.5  | 0.0   | R | COG1026                 | Predicted Zn-dependent peptidases, insulinase-like                                                                                         |
| TS28Eub6780 CDS CDS     | 1.0  | 43.5  | 0.1   | R | COG1033                 | Predicted exporters of the RND superfamily                                                                                                 |
| TS28Fae09550 CDS CDS    | 0.4  | 40.5  | 0.0   | R | COG1033                 | Predicted exporters of the RND superfamily                                                                                                 |
| TS28Fae19080 CDS CDS    | 0.4  | 31.0  | 0.0   | R | COG1033 COG2409         | Predicted exporters of the RND superfamily Predicted drug exporters of the RND superfamily                                                 |
| TS28Fae17600 CDS CDS    | 0.5  | 37.0  | 0.0   | R | COG1073                 | Hydrolases of the alpha/beta superfamily                                                                                                   |
| Msmi741580 CDS CDS      | 2.9  | 0.5   | 19.3  | R | COG1078                 | HD superfamily phosphohydrolases                                                                                                           |
| TS28Fae22051 CDS CDS    | 1.0  | 42.0  | 0.1   | R | COG1079                 | Uncharacterized ABC-type transport system, permease component                                                                              |
| TS28Clo01121 CDS CDS    | 2.0  | 78.5  | 0.1   | R | COG1092                 | Predicted SAM-dependent methyltransferases                                                                                                 |
| Msmi750844 CDS CDS      | 9.3  | 2.0   | 15.4  | R | COG1094                 | Predicted RNA-binding protein (contains KH domains)                                                                                        |
| TS28Met0234 CDS CDS     | 10.8 | 3.0   | 11.8  | R | COG1094                 | Predicted RNA-binding protein (contains KH domains)                                                                                        |
| TS28Met0233 CDS CDS     | 3.4  | 1.0   | 11.3  | R | COG1094                 | Predicted RNA-binding protein (contains KH domains)                                                                                        |
| TS29Fae04577 CDS CDS    | 3.5  | 1.0   | 11.6  | R | COG1159                 | GTPase                                                                                                                                     |
| Bxyl4337 CDS CDS        | 3.8  | 0.5   | 25.4  | R | COG1160                 | Predicted GTPases                                                                                                                          |
| TS29Bac01265 CDS CDS    | 2.0  | 0.5   | 13.2  | R | COG1160                 | Predicted GTPases                                                                                                                          |
| TS28Rum10174 CDS CDS    | 3.5  | 1.0   | 11.6  | R | COG1160                 | Predicted GTPases                                                                                                                          |
| TS28Fae10403 CDS CDS    | 1.0  | 35.0  | 0.1   | R | COG1160                 | Predicted GTPases                                                                                                                          |
| TS28Col0392 CDS CDS     | 0.5  | 22.5  | 0.1   | R | COG1160                 | Predicted GTPases                                                                                                                          |
| TS29Fae00300 CDS CDS    | 7.0  | 1.5   | 15.4  | R | COG1162                 | Predicted GTPases                                                                                                                          |
| Ccom0377 CDS CDS        | 7.0  | 2.0   | 11.6  | R | COG1201 COG1205         | Lhr-like helicases Distinct helicase family with a unique C-terminal domain including a metal-binding cysteine cluster                     |
| TS28Met0165 CDS CDS     | 1.3  | 43.8  | 0.1   | R | COG1201 COG1205         | Lhr-like helicases Distinct helicase family with a unique C-terminal domain including a metal-binding cysteine cluster                     |
| TS28Fae18151 CDS CDS    | 4.0  | 159.0 | 0.1   | R | COG1203                 | Predicted helicases                                                                                                                        |
| Bdor3609 CDS CDS        | 13.7 | 3.8   | 11.8  | R | COG1234                 | Metal-dependent hydrolases of the beta-lactamase superfamily III                                                                           |
| TS29Clo0772 CDS CDS     | 14.0 | 0.5   | 92.6  | R | COG1272                 | Predicted membrane protein, hemolysin III homolog                                                                                          |
| TS28Clo01378 CDS CDS    | 3.0  | 113.0 | 0.1   | R | COG1284                 | Uncharacterized conserved protein                                                                                                          |
| Csvm1611 CDS CDS        | 14.0 | 1.0   | 46.3  | R | COG1288                 | Predicted membrane protein                                                                                                                 |
| Ceut0478 CDS CDS        | 0.1  | 3.0   | 0.1   | R | COG1289                 | Predicted membrane protein                                                                                                                 |
| CspL21157 CDS CDS       | 0.1  | 7.1   | 0.0   | R | COG1289                 | Predicted membrane protein                                                                                                                 |
| Robe0037 CDS CDS        | 0.1  | 10.1  | 0.0   | R | COG1289                 | Predicted membrane protein                                                                                                                 |
| RintL10785 CDS CDS      | 0.1  | 10.9  | 0.0   | R | COG1289                 | Predicted membrane protein                                                                                                                 |
| Eeli2695 CDS CDS        | 0.1  | 12.8  | 0.0   | R | COG1289                 | Predicted membrane protein                                                                                                                 |
| Dlon2020 CDS CDS        | 0.1  | 13.1  | 0.0   | R | COG1289                 | Predicted membrane protein                                                                                                                 |
| FpraM2120019 CDS CDS    | 0.1  | 18.9  | 0.0   | R | COG1289                 | Predicted membrane protein                                                                                                                 |

|                        |       |       |       |   |                 |                                                                                                      |
|------------------------|-------|-------|-------|---|-----------------|------------------------------------------------------------------------------------------------------|
| CspM6210573 CDS CDS    | 0.1   | 43.7  | 0.0   | R | COG1289         | Predicted membrane protein                                                                           |
| Ehal1317 CDS CDS       | 0.1   | 71.3  | 0.0   | R | COG1289         | Predicted membrane protein                                                                           |
| Rbro0237 CDS CDS       | 0.1   | 93.7  | 0.0   | R | COG1289         | Predicted membrane protein                                                                           |
| TS28Clo01109 CDS CDS   | 2.0   | 110.0 | 0.1   | R | COG1295         | Predicted membrane protein                                                                           |
| TS28Rum13104 CDS CDS   | 1.3   | 0.3   | 13.2  | R | COG1297         | Predicted membrane protein                                                                           |
| Ehal2353 CDS CDS       | 0.5   | 19.5  | 0.1   | R | COG1297         | Predicted membrane protein                                                                           |
| TS28Eub3507 CDS CDS    | 0.5   | 20.5  | 0.1   | R | COG1297         | Predicted membrane protein                                                                           |
| TS28Rum09255 CDS CDS   | 14.0  | 4.0   | 11.6  | R | COG1306         | Uncharacterized conserved protein                                                                    |
| TS28RumUnc0398 CDS CDS | 17.0  | 5.0   | 11.2  | R | COG1306         | Uncharacterized conserved protein                                                                    |
| TS28Fae14048 CDS CDS   | 2.0   | 0.5   | 13.2  | R | COG1307         | Uncharacterized protein conserved in bacteria                                                        |
| TS29Rum05406 CDS CDS   | 2.3   | 0.7   | 11.6  | R | COG1307         | Uncharacterized protein conserved in bacteria                                                        |
| RintL12814 CDS CDS     | 7.0   | 1.0   | 23.1  | R | COG1307 COG1461 | Uncharacterized protein conserved in bacterial Predicted kinase related to dihydroxyacetone kinase   |
| Bste0952 CDS CDS       | 7.0   | 0.5   | 46.3  | R | COG1322         | Uncharacterized protein conserved in bacteria                                                        |
| TS28Clo01130 CDS CDS   | 1.0   | 81.0  | 0.0   | R | COG1354         | Uncharacterized conserved protein                                                                    |
| Bste0789 CDS CDS       | 7.0   | 2.0   | 11.6  | R | COG1357         | Uncharacterized low-complexity proteins                                                              |
| TS28Met0719 CDS CDS    | 8.0   | 1.0   | 26.5  | R | COG1359         | Uncharacterized conserved protein                                                                    |
| Msmi751272 CDS CDS     | 8.0   | 1.0   | 26.5  | R | COG1359         | Uncharacterized conserved protein                                                                    |
| BactD22080 CDS CDS     | 87.0  | 1.0   | 287.7 | R | COG1373         | Predicted ATPase (AAA+ superfamily)                                                                  |
| Bxyl2673 CDS CDS       | 87.0  | 2.0   | 143.9 | R | COG1373         | Predicted ATPase (AAA+ superfamily)                                                                  |
| Bpse1851 CDS CDS       | 8.0   | 1.0   | 26.5  | R | COG1373         | Predicted ATPase (AAA+ superfamily)                                                                  |
| RintL13452 CDS CDS     | 5.0   | 1.0   | 16.5  | R | COG1373         | Predicted ATPase (AAA+ superfamily)                                                                  |
| CspL21205 CDS CDS      | 3.5   | 0.8   | 13.9  | R | COG1373         | Predicted ATPase (AAA+ superfamily)                                                                  |
| Ceut0345 CDS CDS       | 1.0   | 50.0  | 0.1   | R | COG1373         | Predicted ATPase (AAA+ superfamily)                                                                  |
| TS28Rum16221 CDS CDS   | 1.0   | 51.0  | 0.1   | R | COG1373         | Predicted ATPase (AAA+ superfamily)                                                                  |
| TS28Met0533 CDS CDS    | 0.3   | 13.9  | 0.1   | R | COG1373         | Predicted ATPase (AAA+ superfamily)                                                                  |
| TS28Eub0238 CDS CDS    | 0.5   | 98.3  | 0.0   | R | COG1373         | Predicted ATPase (AAA+ superfamily)                                                                  |
| TS29Rum12436 CDS CDS   | 12.0  | 3.0   | 13.2  | R | COG1376         | Uncharacterized protein conserved in bacteria                                                        |
| TS28Rum13543 CDS CDS   | 0.5   | 42.5  | 0.0   | R | COG1376         | Uncharacterized protein conserved in bacteria                                                        |
| Bdor1388 CDS CDS       | 20.0  | 1.0   | 66.1  | R | COG1385         | Uncharacterized protein conserved in bacteria                                                        |
| TS28Eub4232 CDS CDS    | 1.0   | 45.5  | 0.1   | R | COG1385         | Uncharacterized protein conserved in bacteria                                                        |
| Rtor0446 CDS CDS       | 18.0  | 5.0   | 11.9  | R | COG1399         | Predicted metal-binding, possibly nucleic acid-binding protein                                       |
| Bdor4300 CDS CDS       | 2.5   | 0.5   | 16.5  | R | COG1402         | Uncharacterized protein, putative amidase                                                            |
| Msmi751052 CDS CDS     | 3.8   | 1.0   | 12.4  | R | COG1408         | Predicted phosphohydrolases                                                                          |
| Bbre0077 CDS CDS       | 20.0  | 2.0   | 33.1  | R | COG1409         | Predicted phosphohydrolases                                                                          |
| Casp0114 CDS CDS       | 6.0   | 1.0   | 19.8  | R | COG1409         | Predicted phosphohydrolases                                                                          |
| TS28Clo05976 CDS CDS   | 1.0   | 54.0  | 0.1   | R | COG1409         | Predicted phosphohydrolases                                                                          |
| TS28Ali0429 CDS CDS    | 84.0  | 20.0  | 13.9  | R | COG1418         | Predicted HD superfamily hydrolase                                                                   |
| Bdor0584 CDS CDS       | 8.0   | 2.0   | 13.2  | R | COG1418         | Predicted HD superfamily hydrolase                                                                   |
| Bdor3063 CDS CDS       | 28.5  | 9.0   | 10.5  | R | COG1418         | Predicted HD superfamily hydrolase                                                                   |
| TS28Clo01539 CDS CDS   | 1.0   | 224.0 | 0.0   | R | COG1418         | Predicted HD superfamily hydrolase                                                                   |
| TS28Bac5641 CDS CDS    | 0.5   | 20.0  | 0.1   | R | COG1453         | Predicted oxidoreductases of the aldo/keto reductase family                                          |
| TS28Eub7489 CDS CDS    | 2.0   | 89.5  | 0.1   | R | COG1461         | Predicted kinase related to dihydroxyacetone kinase                                                  |
| Csvm4794 CDS CDS       | 6.0   | 1.0   | 19.8  | R | COG1473         | Metal-dependent amidase/aminoacylase/carboxypeptidase                                                |
| Hfil3009 CDS CDS       | 4.0   | 1.0   | 13.2  | R | COG1473         | Metal-dependent amidase/aminoacylase/carboxypeptidase                                                |
| TS28Fae12231 CDS CDS   | 1.0   | 60.5  | 0.1   | R | COG1473         | Metal-dependent amidase/aminoacylase/carboxypeptidase                                                |
| TS29Par858 CDS CDS     | 2.5   | 0.5   | 16.5  | R | COG1479         | Uncharacterized conserved protein                                                                    |
| BactD10459 CDS CDS     | 2.5   | 0.5   | 16.5  | R | COG1479         | Uncharacterized conserved protein                                                                    |
| TS28Eub3845 CDS CDS    | 3.0   | 108.0 | 0.1   | R | COG1479 COG3586 | Uncharacterized conserved protein Uncharacterized conserved protein                                  |
| TS28Clo01408 CDS CDS   | 3.0   | 114.0 | 0.1   | R | COG1481         | Uncharacterized protein conserved in bacteria                                                        |
| Rgna3174 CDS CDS       | 7.0   | 1.0   | 23.1  | R | COG1511         | Predicted membrane protein                                                                           |
| TS28Fae11799 CDS CDS   | 1.0   | 50.0  | 0.1   | R | COG1511 COG2409 | Predicted membrane protein Predicted drug exporters of the RND superfamily                           |
| Msmi751396 CDS CDS     | 5.0   | 0.5   | 33.1  | R | COG1537         | Predicted RNA-binding proteins                                                                       |
| TS28Clo01096 CDS CDS   | 4.0   | 138.0 | 0.1   | R | COG1559         | Predicted periplasmic solute-binding protein                                                         |
| TS28Eub5217 CDS CDS    | 1.0   | 65.0  | 0.1   | R | COG1559         | Predicted periplasmic solute-binding protein                                                         |
| TS28Eub7485 CDS CDS    | 0.5   | 51.0  | 0.0   | R | COG1561         | Uncharacterized stress-induced protein                                                               |
| Msmi751191 CDS CDS     | 8.9   | 2.5   | 11.8  | R | COG1571         | Predicted DNA-binding protein containing a Zn-ribbon domain                                          |
| Msmi740195 CDS CDS     | 2.3   | 0.6   | 13.2  | R | COG1578         | Uncharacterized conserved protein                                                                    |
| Msmi751485 CDS CDS     | 2.3   | 0.6   | 13.2  | R | COG1578         | Uncharacterized conserved protein                                                                    |
| TS28Bac5013 CDS CDS    | 21.2  | 3.5   | 20.0  | R | COG1579         | Zn-ribbon protein, possibly nucleic acid-binding                                                     |
| Bdor2041 CDS CDS       | 38.5  | 3.0   | 42.4  | R | COG1610         | Uncharacterized conserved protein                                                                    |
| Bdor1880 CDS CDS       | 14.7  | 3.7   | 13.2  | R | COG1611         | Predicted Rossmann fold nucleotide-binding protein                                                   |
| TS28Eub1511 CDS CDS    | 1.0   | 41.5  | 0.1   | R | COG1624         | Uncharacterized conserved protein                                                                    |
| TS28Clo00505 CDS CDS   | 2.0   | 75.5  | 0.1   | R | COG1636         | Uncharacterized protein conserved in bacteria                                                        |
| TS28Eub3862 CDS CDS    | 0.5   | 30.0  | 0.1   | R | COG1636         | Uncharacterized protein conserved in bacteria                                                        |
| Ehal1108 CDS CDS       | 9.0   | 2.5   | 11.9  | R | COG1641         | Uncharacterized conserved protein                                                                    |
| Bste2176 CDS CDS       | 8.5   | 2.0   | 14.1  | R | COG1649         | Uncharacterized protein conserved in bacteria                                                        |
| Bumi0908 CDS CDS       | 18.7  | 5.0   | 12.3  | R | COG1649         | Uncharacterized protein conserved in bacteria                                                        |
| TS28Bac2304 CDS CDS    | 18.7  | 5.0   | 12.3  | R | COG1649         | Uncharacterized protein conserved in bacteria                                                        |
| TS28Bac4526 CDS CDS    | 20.0  | 6.5   | 10.2  | R | COG1649         | Uncharacterized protein conserved in bacteria                                                        |
| TS28Clo00572 CDS CDS   | 2.0   | 153.0 | 0.0   | R | COG1649         | Uncharacterized protein conserved in bacteria                                                        |
| TS29Rum12932 CDS CDS   | 2.0   | 0.3   | 19.8  | R | COG1660         | Predicted P-loop-containing kinase                                                                   |
| TS29Fae08070 CDS CDS   | 0.5   | 28.0  | 0.1   | R | COG1672         | Predicted ATPase (AAA+ superfamily)                                                                  |
| TS28Fae17290 CDS CDS   | 0.5   | 28.0  | 0.1   | R | COG1672         | Predicted ATPase (AAA+ superfamily)                                                                  |
| TS29Fae06825 CDS CDS   | 1.0   | 86.0  | 0.0   | R | COG1672         | Predicted ATPase (AAA+ superfamily)                                                                  |
| TS28Fae19056 CDS CDS   | 3.5   | 0.5   | 23.1  | R | COG1683         | Uncharacterized conserved protein                                                                    |
| Msmi740313 CDS CDS     | 7.0   | 0.3   | 92.6  | R | COG1690         | Uncharacterized conserved protein                                                                    |
| Msmi751369 CDS CDS     | 7.5   | 1.8   | 14.2  | R | COG1690         | Uncharacterized conserved protein                                                                    |
| Msmi751569 CDS CDS     | 5.8   | 0.5   | 38.6  | R | COG1712         | Predicted dinucleotide-utilizing enzyme                                                              |
| TS28Met0460 CDS CDS    | 3.1   | 0.7   | 15.3  | R | COG1719         | Predicted hydrocarbon binding protein (contains V4R domain)                                          |
| TS29Rum00049 CDS CDS   | 0.3   | 25.0  | 0.0   | R | COG1720         | Uncharacterized conserved protein                                                                    |
| BactD12067 CDS CDS     | 2.0   | 0.5   | 13.2  | R | COG1721         | Uncharacterized conserved protein (some members contain a von Willebrand factor type A (vWA) domain) |
| FpraM2121018 CDS CDS   | 9.8   | 0.5   | 65.0  | R | COG1744         | Uncharacterized ABC-type transport system, periplasmic component/surface lipoprotein                 |
| Beap2813 CDS CDS       | 90.6  | 6.0   | 50.0  | R | COG1744         | Uncharacterized ABC-type transport system, periplasmic component/surface lipoprotein                 |
| TS28RumUnc1427 CDS CDS | 118.5 | 8.0   | 49.0  | R | COG1744         | Uncharacterized ABC-type transport system, periplasmic component/surface lipoprotein                 |

|                            |      |       |      |   |                 |                                                                                                                                                           |
|----------------------------|------|-------|------|---|-----------------|-----------------------------------------------------------------------------------------------------------------------------------------------------------|
| TS29Fae02846 CDS CDS       | 3.5  | 0.5   | 23.1 | R | COG1744         | Uncharacterized ABC-type transport system, periplasmic component/surface lipoprotein                                                                      |
| TS28RumUnc0265 CDS CDS     | 35.0 | 6.0   | 19.3 | R | COG1744         | Uncharacterized ABC-type transport system, periplasmic component/surface lipoprotein                                                                      |
| TS29Rum17154 CDS CDS       | 4.5  | 1.0   | 14.9 | R | COG1744         | Uncharacterized ABC-type transport system, periplasmic component/surface lipoprotein                                                                      |
| TS29Fae05803 CDS CDS       | 5.5  | 1.5   | 12.1 | R | COG1744         | Uncharacterized ABC-type transport system, periplasmic component/surface lipoprotein                                                                      |
| Svar1090 CDS CDS           | 3.4  | 1.0   | 11.2 | R | COG1744         | Uncharacterized ABC-type transport system, periplasmic component/surface lipoprotein                                                                      |
| Msmi741444 CDS CDS         | 6.0  | 0.7   | 29.8 | R | COG1745         | Predicted metal-binding protein                                                                                                                           |
| TS28Met1087 CDS CDS        | 6.0  | 0.7   | 29.8 | R | COG1745         | Predicted metal-binding protein                                                                                                                           |
| Msmi740033 CDS CDS         | 15.0 | 4.0   | 12.4 | R | COG1759         | ATP-utilizing enzymes of ATP-grasp superfamily (probably carboligases)                                                                                    |
| TS28Fae20114 CDS CDS       | 1.0  | 46.0  | 0.1  | R | COG1768         | Predicted phosphohydrolase                                                                                                                                |
| Msmi741426 CDS CDS         | 5.1  | 1.3   | 12.6 | R | COG1771         | Uncharacterized protein conserved in archaea                                                                                                              |
| Dlon2630 CDS CDS           | 6.0  | 0.5   | 39.7 | R | COG1774         | Uncharacterized homolog of PSP1                                                                                                                           |
| FpraM2120675 CDS CDS       | 6.0  | 0.5   | 39.7 | R | COG1774         | Uncharacterized homolog of PSP1                                                                                                                           |
| Bdor2879 CDS CDS           | 0.3  | 13.0  | 0.1  | R | COG1774         | Uncharacterized homolog of PSP1                                                                                                                           |
| TS28Bac5737 CDS CDS        | 0.3  | 20.0  | 0.1  | R | COG1774         | Uncharacterized homolog of PSP1                                                                                                                           |
| TS29Fae00492 CDS CDS       | 4.5  | 0.5   | 29.8 | R | COG1799         | Uncharacterized protein conserved in bacteria                                                                                                             |
| Dlon2201 CDS CDS           | 5.5  | 1.0   | 18.2 | R | COG1799         | Uncharacterized protein conserved in bacteria                                                                                                             |
| Rtor2147 CDS CDS           | 5.0  | 1.0   | 16.5 | R | COG1799         | Uncharacterized protein conserved in bacteria                                                                                                             |
| TS28Clo00516 CDS CDS       | 1.0  | 68.0  | 0.0  | R | COG1799         | Uncharacterized protein conserved in bacteria                                                                                                             |
| Msmi750254 CDS CDS         | 2.3  | 0.3   | 29.8 | R | COG1817         | Uncharacterized protein conserved in archaea                                                                                                              |
| Msmi740225 CDS CDS         | 3.5  | 0.5   | 23.1 | R | COG1822         | Predicted archaeal membrane protein                                                                                                                       |
| Msmi751377 CDS CDS         | 4.9  | 0.3   | 48.8 | R | COG1836         | Predicted membrane protein                                                                                                                                |
| TS28Rum09890 CDS CDS       | 6.5  | 1.5   | 14.3 | R | COG1837         | Predicted RNA-binding protein (contains KH domain)                                                                                                        |
| Rtor1397 CDS CDS           | 6.5  | 1.5   | 14.3 | R | COG1837         | Predicted RNA-binding protein (contains KH domain)                                                                                                        |
| TS29Rum05911 CDS CDS       | 4.9  | 0.7   | 24.5 | R | COG1847         | Predicted RNA-binding protein                                                                                                                             |
| Rtor0909 CDS CDS           | 4.9  | 1.2   | 14.0 | R | COG1847         | Predicted RNA-binding protein                                                                                                                             |
| Msmi750077 CDS CDS         | 6.0  | 1.0   | 19.0 | R | COG1860         | Uncharacterized protein conserved in archaea                                                                                                              |
| Msmi741633 CDS CDS         | 6.0  | 1.0   | 19.0 | R | COG1860         | Uncharacterized protein conserved in archaea                                                                                                              |
| TS28Fae09811 CDS CDS       | 7.0  | 2.0   | 11.6 | R | COG1873         | Uncharacterized conserved protein                                                                                                                         |
| Msmi740789 CDS CDS         | 10.0 | 3.0   | 11.0 | R | COG1873         | Uncharacterized conserved protein                                                                                                                         |
| Msmi741256 CDS CDS         | 4.0  | 0.8   | 15.9 | R | COG1891         | Uncharacterized protein conserved in archaea                                                                                                              |
| Msmi741440 CDS CDS         | 3.8  | 0.3   | 37.2 | R | COG1900         | Uncharacterized conserved protein                                                                                                                         |
| Casp1085 CDS CDS           | 6.0  | 1.0   | 19.8 | R | COG1915         | Uncharacterized conserved protein                                                                                                                         |
| Robe2729 CDS CDS           | 0.5  | 18.5  | 0.1  | R | COG1917 COG0599 | Uncharacterized conserved protein, contains double-stranded beta-helix domain Uncharacterized homolog of gamma-carboxymuconolactone decarboxylase subunit |
| TS28RumUnc0997 CDS CDS     | 7.0  | 1.0   | 23.1 | R | COG1923         | Uncharacterized host factor I protein                                                                                                                     |
| TS28Dor2914 CDS CDS        | 0.5  | 18.0  | 0.1  | R | COG1964         | Predicted Fe-S oxidoreductases                                                                                                                            |
| Pmer2384 CDS CDS           | 10.0 | 3.0   | 11.0 | R | COG1971         | Predicted membrane protein                                                                                                                                |
| TS28Rum05141 CDS CDS       | 5.4  | 1.0   | 17.9 | R | COG2001         | Uncharacterized protein conserved in bacteria                                                                                                             |
| Dfor0850 CDS CDS           | 10.0 | 3.0   | 11.0 | R | COG2001         | Uncharacterized protein conserved in bacteria                                                                                                             |
| TS28Rum13912 CDS CDS       | 0.5  | 26.0  | 0.1  | R | COG2005 COG2068 | N-terminal domain of molybdenum-binding protein Uncharacterized MobA-related protein                                                                      |
| Pmer1803 CDS CDS           | 8.0  | 2.0   | 13.2 | R | COG2006         | Uncharacterized conserved protein                                                                                                                         |
| Ccom2285 CDS CDS           | 5.0  | 1.0   | 16.5 | R | COG2013         | Uncharacterized conserved protein                                                                                                                         |
| TS28Fae06758 CDS CDS       | 8.0  | 2.0   | 13.2 | R | COG2013         | Uncharacterized conserved protein                                                                                                                         |
| Msmi751431 CDS CDS         | 2.3  | 0.3   | 29.8 | R | COG2054         | Uncharacterized archaeal kinase related to aspartokinases, uridylyate kinases                                                                             |
| TS29Rum14664 CDS CDS       | 10.0 | 2.0   | 16.5 | R | COG2068         | Uncharacterized MobA-related protein                                                                                                                      |
| TS28Fae16637 CDS CDS       | 0.5  | 69.5  | 0.0  | R | COG2070         | Dioxygenases related to 2-nitropropane dioxygenase                                                                                                        |
| Msmi750753 CDS CDS         | 6.6  | 0.5   | 43.3 | R | COG2078 COG3885 | Uncharacterized conserved protein Uncharacterized conserved protein                                                                                       |
| TS29Met0119 CDS CDS        | 4.1  | 0.9   | 14.6 | R | COG2078 COG3885 | Uncharacterized conserved protein Uncharacterized conserved protein                                                                                       |
| Msmi740926 CDS CDS         | 2.8  | 0.9   | 10.1 | R | COG2078 COG3885 | Uncharacterized conserved protein Uncharacterized conserved protein                                                                                       |
| Msmi740549 CDS CDS         | 2.5  | 0.3   | 24.8 | R | COG2081         | Predicted flavoproteins                                                                                                                                   |
| Msmi750311 CDS CDS         | 14.0 | 0.5   | 92.6 | R | COG2085         | Predicted dinucleotide-binding enzymes                                                                                                                    |
| Robe3263 CDS CDS           | 5.3  | 1.5   | 11.8 | R | COG2096 COG3193 | Uncharacterized conserved protein Uncharacterized protein, possibly involved in utilization of glycolate and pronanediol                                  |
| Msmi741493 CDS CDS         | 5.0  | 0.3   | 66.1 | R | COG2102         | Predicted ATPases of PP-loop superfamily                                                                                                                  |
| Msmi750220 CDS CDS         | 3.0  | 0.3   | 39.7 | R | COG2102         | Predicted ATPases of PP-loop superfamily                                                                                                                  |
| ShigspD92223 CDS CDS       | 6.8  | 1.0   | 22.6 | R | COG2103         | Predicted sugar phosphate isomerase                                                                                                                       |
| Bste2157 CDS CDS           | 19.0 | 6.0   | 10.5 | R | COG2103         | Predicted sugar phosphate isomerase                                                                                                                       |
| Msmi741031 CDS CDS         | 5.7  | 0.9   | 20.4 | R | COG2106         | Uncharacterized conserved protein                                                                                                                         |
| Msmi741001 CDS CDS         | 1.8  | 0.3   | 18.2 | R | COG2129         | Predicted phosphoesterases, related to the Ice protein                                                                                                    |
| Msmi740500 CDS CDS         | 9.5  | 0.8   | 37.7 | R | COG2138         | Uncharacterized conserved protein                                                                                                                         |
| TS28Clo00802 CDS CDS       | 1.0  | 52.0  | 0.1  | R | COG2179         | Predicted hydrolase of the HAD superfamily                                                                                                                |
| Msmi750666 CDS CDS         | 6.0  | 0.3   | 79.4 | R | COG2220         | Predicted Zn-dependent hydrolases of the beta-lactamase fold                                                                                              |
| Msmi741015 CDS CDS         | 6.0  | 0.3   | 79.4 | R | COG2220         | Predicted Zn-dependent hydrolases of the beta-lactamase fold                                                                                              |
| BactD20437 CDS CDS         | 2.0  | 0.5   | 13.2 | R | COG2220         | Predicted Zn-dependent hydrolases of the beta-lactamase fold                                                                                              |
| BVU1865 CDS aminopeptidase | 0.3  | 11.7  | 0.1  | R | COG2234         | Predicted aminopeptidases                                                                                                                                 |
| TS28Bac0940 CDS CDS        | 0.3  | 18.7  | 0.1  | R | COG2234         | Predicted aminopeptidases                                                                                                                                 |
| TS28Fae01749 CDS CDS       | 1.0  | 35.5  | 0.1  | R | COG2244         | Membrane protein involved in the export of O-antigen and teichoic acid                                                                                    |
| TS28Clo00691 CDS CDS       | 4.0  | 154.0 | 0.1  | R | COG2244         | Membrane protein involved in the export of O-antigen and teichoic acid                                                                                    |
| TS29Rum16015 CDS CDS       | 1.0  | 41.0  | 0.1  | R | COG2244         | Membrane protein involved in the export of O-antigen and teichoic acid                                                                                    |
| TS28Fae15753 CDS CDS       | 1.0  | 44.0  | 0.1  | R | COG2244         | Membrane protein involved in the export of O-antigen and teichoic acid                                                                                    |
| TS28Eub0884 CDS CDS        | 1.0  | 51.0  | 0.1  | R | COG2244         | Membrane protein involved in the export of O-antigen and teichoic acid                                                                                    |
| TS28Fae20409 CDS CDS       | 1.0  | 66.0  | 0.1  | R | COG2244         | Membrane protein involved in the export of O-antigen and teichoic acid                                                                                    |
| TS28Fae17143 CDS CDS       | 1.0  | 83.0  | 0.0  | R | COG2244         | Membrane protein involved in the export of O-antigen and teichoic acid                                                                                    |

|                         |       |       |      |   |                 |                                                                                             |
|-------------------------|-------|-------|------|---|-----------------|---------------------------------------------------------------------------------------------|
| TS29Rum11095 CDS CDS    | 20.0  | 3.0   | 22.0 | R | COG2252         | Permeases                                                                                   |
| TS28Rum08091 CDS CDS    | 15.0  | 4.0   | 12.4 | R | COG2257         | Uncharacterized homolog of the cytoplasmic domain of flagellar protein Fh1B                 |
| Pmer1168 CDS CDS        | 6.5   | 1.0   | 21.5 | R | COG2259         | Predicted membrane protein                                                                  |
| Bova2305 CDS CDS        | 2.0   | 0.3   | 19.8 | R | COG2262         | GTases                                                                                      |
| TS28Fae08961 CDS CDS    | 2.0   | 74.0  | 0.1  | R | COG2262         | GTases                                                                                      |
| BactD13474 CDS CDS      | 13.3  | 0.5   | 87.6 | R | COG2304         | Uncharacterized protein containing a von Willebrand factor type A (vWA) domain              |
| Bova0525 CDS CDS        | 6.0   | 1.0   | 19.7 | R | COG2304         | Uncharacterized protein containing a von Willebrand factor type A (vWA) domain              |
| Bste1197 CDS CDS        | 26.0  | 8.0   | 10.7 | R | COG2304         | Uncharacterized protein containing a von Willebrand factor type A (vWA) domain              |
| TS28RumUnc1238 CDS CDS  | 4.0   | 1.0   | 13.2 | R | COG2333         | Predicted hydrolase (metallo-beta-lactamase superfamily)                                    |
| PRABACTJOHN3210 CDS CDS | 27.5  | 8.0   | 11.4 | R | COG2333         | Predicted hydrolase (metallo-beta-lactamase superfamily)                                    |
| TS28Par0106 CDS CDS     | 1.0   | 41.0  | 0.1  | R | COG2339         | Predicted membrane protein                                                                  |
| TS28Rum12178 CDS CDS    | 21.0  | 3.0   | 23.1 | R | COG2344         | AT-rich DNA-binding protein                                                                 |
| TS28CloUnc091 CDS CDS   | 20.0  | 6.0   | 11.0 | R | COG2357         | Uncharacterized protein conserved in bacteria                                               |
| TS28Clo0938 CDS CDS     | 1.0   | 100.0 | 0.0  | R | COG2357         | Uncharacterized protein conserved in bacteria                                               |
| TS28Col1689 CDS CDS     | 124.0 | 23.0  | 17.8 | R | COG2358         | TRAP-type uncharacterized transport system, periplasmic component                           |
| TS28Clo01118 CDS CDS    | 1.0   | 40.0  | 0.1  | R | COG2359         | Uncharacterized protein conserved in bacteria                                               |
| Pmer2942 CDS CDS        | 16.0  | 3.0   | 17.6 | R | COG2364         | Predicted membrane protein                                                                  |
| TS28Dor2922 CDS CDS     | 0.5   | 35.0  | 0.0  | R | COG2364         | Predicted membrane protein                                                                  |
| ShigspD92361 CDS CDS    | 7.0   | 1.0   | 23.1 | R | COG2373         | Large extracellular alpha-helical protein                                                   |
| TS29Rum19899 CDS CDS    | 5.0   | 1.0   | 16.5 | R | COG2384         | Predicted SAM-dependent methyltransferase                                                   |
| Bdor3073 CDS CDS        | 4.5   | 1.0   | 14.9 | R | COG2388         | Predicted acetyltransferase                                                                 |
| Msmi750271 CDS CDS      | 4.3   | 0.6   | 24.1 | R | COG2403         | Predicted GTPase                                                                            |
| TS28Met0926 CDS CDS     | 0.3   | 10.0  | 0.1  | R | COG2457         | Uncharacterized conserved protein                                                           |
| TS29Fae10244 CDS CDS    | 6.0   | 1.0   | 19.8 | R | COG2501         | Uncharacterized conserved protein                                                           |
| TS28Fae01729 CDS CDS    | 17.0  | 4.0   | 14.1 | R | COG2501         | Uncharacterized conserved protein                                                           |
| CspS22369 CDS CDS       | 2.0   | 0.5   | 13.2 | R | COG2501         | Uncharacterized conserved protein                                                           |
| TS29Clo09011 CDS CDS    | 11.0  | 3.0   | 12.1 | R | COG2509         | Uncharacterized FAD-dependent dehydrogenases                                                |
| TS28Eub6395 CDS CDS     | 1.0   | 101.5 | 0.0  | R | COG2509         | Uncharacterized FAD-dependent dehydrogenases                                                |
| TS29Clo1899 CDS CDS     | 1.7   | 0.3   | 16.5 | R | COG2607         | Predicted ATPase (AAA+ superfamily)                                                         |
| TS28Rum13839 CDS CDS    | 5.0   | 1.0   | 16.5 | R | COG2607         | Predicted ATPase (AAA+ superfamily)                                                         |
| Bdor0061 CDS CDS        | 21.5  | 3.0   | 23.7 | R | COG2738         | Predicted Zn-dependent protease                                                             |
| TS29Fae00713 CDS CDS    | 11.5  | 0.5   | 76.1 | R | COG2739         | Uncharacterized protein conserved in bacteria                                               |
| ShigspD90529 CDS CDS    | 10.5  | 1.0   | 34.7 | R | COG2828 COG3181 | Uncharacterized protein conserved in bacteria Uncharacterized protein conserved in bacteria |
| Aeol0604 CDS CDS        | 5.0   | 1.0   | 16.5 | R | COG2848         | Uncharacterized conserved protein                                                           |
| Casp2540 CDS CDS        | 4.0   | 1.0   | 13.2 | R | COG2848         | Uncharacterized conserved protein                                                           |
| TS29Rum20177 CDS CDS    | 0.5   | 17.0  | 0.1  | R | COG2848         | Uncharacterized conserved protein                                                           |
| TS28Rum15365 CDS CDS    | 0.5   | 36.0  | 0.0  | R | COG2848         | Uncharacterized conserved protein                                                           |
| Bste0757 CDS CDS        | 20.0  | 5.0   | 13.2 | R | COG2855         | Predicted membrane protein                                                                  |
| TS28Bac0869 CDS CDS     | 0.3   | 19.5  | 0.1  | R | COG2908         | Uncharacterized protein conserved in bacteria                                               |
| TS29Fae06188 CDS CDS    | 38.0  | 2.0   | 62.8 | R | COG2929         | Uncharacterized protein conserved in bacteria                                               |
| Bdor2857 CDS CDS        | 0.3   | 14.5  | 0.1  | R | COG2936         | Predicted acyl esterases                                                                    |
| Pmer24411 CDS CDS       | 5.0   | 1.0   | 16.5 | R | COG2954         | Uncharacterized protein conserved in bacteria                                               |
| BactD11837 CDS CDS      | 4.0   | 1.0   | 13.2 | R | COG2985         | Predicted permease                                                                          |
| TS29Rum11762 CDS CDS    | 1.0   | 38.0  | 0.1  | R | COG2996         | Uncharacterized protein conserved in bacteria                                               |
| ShigspD92643 CDS CDS    | 6.5   | 1.0   | 21.5 | R | COG3008         | Paraquat-inducible protein B                                                                |
| TS28Bac7399 CDS CDS     | 12.0  | 1.0   | 39.7 | R | COG3041         | Uncharacterized protein conserved in bacteria                                               |
| TS29Clo4944 CDS CDS     | 6.3   | 2.0   | 10.3 | R | COG3041         | Uncharacterized protein conserved in bacteria                                               |
| Bdor0596 CDS CDS        | 21.0  | 3.0   | 23.1 | R | COG3055         | Uncharacterized protein conserved in bacteria                                               |
| Bdor2055 CDS CDS        | 3.0   | 0.7   | 14.9 | R | COG3176         | Putative hemolysin                                                                          |
| Bxy12352 CDS CDS        | 5.0   | 1.0   | 16.5 | R | COG3177         | Uncharacterized conserved protein                                                           |
| ShigspD90379 CDS CDS    | 8.0   | 0.5   | 52.9 | R | COG3214         | Uncharacterized protein conserved in bacteria                                               |
| Msmi751170 CDS CDS      | 5.5   | 1.7   | 10.8 | R | COG3273         | Uncharacterized conserved protein                                                           |
| TS28Fae15688 CDS CDS    | 191.0 | 55.0  | 11.5 | R | COG3291         | FOG: PKD repeat                                                                             |
| TS28Rum02197 CDS CDS    | 34.0  | 10.0  | 11.2 | R | COG3291         | FOG: PKD repeat                                                                             |
| TS28Fae11308 CDS CDS    | 1.0   | 44.0  | 0.1  | R | COG3291         | FOG: PKD repeat                                                                             |
| TS28Met1107 CDS CDS     | 0.3   | 15.5  | 0.1  | R | COG3291         | FOG: PKD repeat                                                                             |
| TS28Clo01735 CDS CDS    | 2.0   | 209.0 | 0.0  | R | COG3291         | FOG: PKD repeat                                                                             |
| TS28Bac4220 CDS CDS     | 8.0   | 2.0   | 13.2 | R | COG3304         | Predicted membrane protein                                                                  |
| Bdor2382 CDS CDS        | 12.3  | 3.0   | 13.6 | R | COG3323 COG0327 | Uncharacterized protein conserved in bacteria Uncharacterized conserved protein             |
| Msmi750663 CDS CDS      | 2.9   | 0.3   | 37.7 | R | COG3356         | Predicted membrane protein                                                                  |
| TS29Met0772 CDS CDS     | 5.6   | 1.0   | 18.5 | R | COG3356         | Predicted membrane protein                                                                  |
| TS28Ali1508 CDS CDS     | 126.3 | 10.0  | 41.8 | R | COG3391         | Uncharacterized conserved protein                                                           |
| TS28Ali1510 CDS CDS     | 161.0 | 28.0  | 19.0 | R | COG3391         | Uncharacterized conserved protein                                                           |
| Pmer3415 CDS CDS        | 57.5  | 6.0   | 31.7 | R | COG3533         | Uncharacterized protein conserved in bacteria                                               |
| Bdor2171 CDS CDS        | 44.5  | 8.0   | 18.4 | R | COG3560         | Predicted oxidoreductase related to nitroreductase                                          |
| Pmer1538 CDS CDS        | 9.0   | 2.0   | 14.9 | R | COG3560         | Predicted oxidoreductase related to nitroreductase                                          |
| TS28Fae08800 CDS CDS    | 1.0   | 34.0  | 0.1  | R | COG3567         | Uncharacterized protein conserved in bacteria                                               |
| Pmer2293 CDS CDS        | 7.5   | 1.0   | 24.8 | R | COG3568 COG4412 | Metal-dependent hydrolase Uncharacterized protein conserved in bacteria                     |
| TS28Clo00886 CDS CDS    | 1.0   | 108.0 | 0.0  | R | COG3581 COG3580 | Uncharacterized protein conserved in bacteria Uncharacterized protein conserved in bacteria |
| TS28RumUnc0714 CDS CDS  | 11.0  | 2.0   | 18.2 | R | COG3641         | Predicted membrane protein, putative toxin regulator                                        |
| TS28Dor0443 CDS CDS     | 0.5   | 17.5  | 0.1  | R | COG3681         | Uncharacterized conserved protein                                                           |
| TS29Fae06454 CDS CDS    | 0.5   | 40.5  | 0.0  | R | COG3786         | Uncharacterized protein conserved in bacteria                                               |
| TS28Fae08484 CDS CDS    | 0.5   | 40.5  | 0.0  | R | COG3786         | Uncharacterized protein conserved in bacteria                                               |
| TS28Eub4416 CDS CDS     | 4.0   | 132.5 | 0.1  | R | COG3858         | Predicted glycosyl hydrolase                                                                |
| TS28Fae21833 CDS CDS    | 4.0   | 1.0   | 13.2 | R | COG3862         | Uncharacterized protein with conserved CXXC pairs                                           |
| TS29Fae05457 CDS CDS    | 15.0  | 2.0   | 24.8 | R | COG3876         | Uncharacterized protein conserved in bacteria                                               |
| TS29Bac01591 CDS CDS    | 4.7   | 0.7   | 23.1 | R | COG3876         | Uncharacterized protein conserved in bacteria                                               |
| Msmi751519 CDS CDS      | 16.2  | 4.3   | 12.3 | R | COG3894         | Uncharacterized metal-binding protein                                                       |
| TS28Clo00424 CDS CDS    | 3.0   | 117.0 | 0.1  | R | COG3910         | Predicted ATPase                                                                            |
| TS29LacUnc011 CDS CDS   | 14.0  | 3.0   | 15.4 | R | COG3937         | Uncharacterized conserved protein                                                           |
| TS28Bac8004 CDS CDS     | 1.0   | 33.7  | 0.1  | R | COG3940         | Predicted beta-xylosidase                                                                   |
| TS29Fae03489 CDS CDS    | 12.0  | 2.0   | 19.8 | R | COG3943         | Virulence protein                                                                           |
| Casp5726 CDS CDS        | 5.0   | 1.0   | 16.5 | R | COG3968         | Uncharacterized protein related to glutamine synthetase                                     |

|                        |       |       |       |   |         |                                                                                                                         |
|------------------------|-------|-------|-------|---|---------|-------------------------------------------------------------------------------------------------------------------------|
| TS28Fae20021 CDS CDS   | 1.0   | 39.0  | 0.1   | R | COG3968 | Uncharacterized protein related to glutamine synthetase                                                                 |
| TS28Fae20568 CDS CDS   | 1.0   | 63.5  | 0.1   | R | COG3968 | Uncharacterized protein related to glutamine synthetase                                                                 |
| BactD13448 CDS CDS     | 3.3   | 0.5   | 22.0  | R | COG3969 | Predicted phosphoadenosine phosphosulfate sulfotransferase                                                              |
| TS28Bif3124 CDS CDS    | 1.3   | 44.7  | 0.1   | R | COG3973 | Superfamily I DNA and RNA helicases                                                                                     |
| TS28Clo00690 CDS CDS   | 5.0   | 232.0 | 0.1   | R | COG3973 | Superfamily I DNA and RNA helicases                                                                                     |
| TS28Eub1029 CDS CDS    | 1.0   | 164.0 | 0.0   | R | COG3973 | Superfamily I DNA and RNA helicases                                                                                     |
| BactD13488 CDS CDS     | 7.0   | 1.0   | 23.1  | R | COG3979 | Uncharacterized protein contain chitin-binding domain type 3                                                            |
| Msmi750405 CDS CDS     | 1.0   | 0.3   | 13.2  | R | COG4026 | Uncharacterized protein containing TOPRIM domain, potential nuclease                                                    |
| Msmi750038 CDS CDS     | 4.7   | 0.3   | 46.6  | R | COG4030 | Uncharacterized protein conserved in archaea                                                                            |
| Msmi741676 CDS CDS     | 4.7   | 1.3   | 11.7  | R | COG4030 | Uncharacterized protein conserved in archaea                                                                            |
| TS28Met0625 CDS CDS    | 8.9   | 0.3   | 117.9 | R | COG4036 | Predicted membrane protein                                                                                              |
| Msmi741687 CDS CDS     | 9.6   | 0.8   | 42.3  | R | COG4036 | Predicted membrane protein                                                                                              |
| Msmi741689 CDS CDS     | 2.0   | 0.2   | 33.1  | R | COG4038 | Predicted membrane protein                                                                                              |
| Msmi750025 CDS CDS     | 3.8   | 0.5   | 27.6  | R | COG4038 | Predicted membrane protein                                                                                              |
| TS29Met0091 CDS CDS    | 3.8   | 0.8   | 15.8  | R | COG4038 | Predicted membrane protein                                                                                              |
| TS28Met0628 CDS CDS    | 3.8   | 0.8   | 15.8  | R | COG4038 | Predicted membrane protein                                                                                              |
| Msmi741692 CDS CDS     | 4.3   | 1.0   | 14.1  | R | COG4041 | Predicted membrane protein                                                                                              |
| Msmi740981 CDS CDS     | 2.0   | 0.3   | 19.8  | R | COG4050 | Uncharacterized protein conserved in archaea                                                                            |
| TS28Met1260 CDS CDS    | 0.3   | 17.9  | 0.0   | R | COG4071 | Uncharacterized protein conserved in archaea                                                                            |
| Msmi741110 CDS CDS     | 8.5   | 1.6   | 17.8  | R | COG4079 | Uncharacterized protein conserved in archaea                                                                            |
| Msmi750566 CDS CDS     | 10.8  | 2.3   | 15.9  | R | COG4079 | Uncharacterized protein conserved in archaea                                                                            |
| Msmi750257 CDS CDS     | 10.0  | 0.3   | 99.2  | R | COG4081 | Uncharacterized protein conserved in archaea                                                                            |
| TS28Met1320 CDS CDS    | 10.0  | 2.3   | 14.2  | R | COG4081 | Uncharacterized protein conserved in archaea                                                                            |
| TS29Rum03113 CDS CDS   | 38.0  | 7.0   | 18.0  | R | COG4086 | Predicted secreted protein                                                                                              |
| Bdor2615 CDS CDS       | 39.3  | 7.7   | 17.0  | R | COG4105 | DNA uptake lipoprotein                                                                                                  |
| Pmer1141 CDS CDS       | 20.5  | 2.0   | 33.9  | R | COG4185 | Uncharacterized protein conserved in bacteria                                                                           |
| TS29Bac09669 CDS CDS   | 2.0   | 0.5   | 13.2  | R | COG4198 | Uncharacterized conserved protein                                                                                       |
| TS28Bac2502 CDS CDS    | 36.5  | 10.0  | 12.1  | R | COG4198 | Uncharacterized conserved protein                                                                                       |
| TS28Fae22118 CDS CDS   | 1.0   | 43.5  | 0.1   | R | COG4200 | Uncharacterized protein conserved in bacteria                                                                           |
| TS29Bac05446 CDS CDS   | 2.7   | 0.3   | 26.5  | R | COG4225 | Predicted unsaturated glucuronyl hydrolase involved in regulation of bacterial surface properties, and related proteins |
| TS28Fae18169 CDS CDS   | 1.0   | 39.5  | 0.1   | R | COG4260 | Putative virion core protein (lumphy skin disease virus)                                                                |
| TS28Eub5894 CDS CDS    | 0.5   | 20.0  | 0.1   | R | COG4260 | Putative virion core protein (lumphy skin disease virus)                                                                |
| TS28Clo00615 CDS CDS   | 3.0   | 157.0 | 0.1   | R | COG4260 | Putative virion core protein (lumphy skin disease virus)                                                                |
| TS28Dor0344 CDS CDS    | 0.5   | 24.5  | 0.1   | R | COG4277 | Predicted DNA-binding protein with the Helix-hairpin-helix motif                                                        |
| TS28Eub7197 CDS CDS    | 1.0   | 86.0  | 0.0   | R | COG4277 | Predicted DNA-binding protein with the Helix-hairpin-helix motif                                                        |
| Bste2159 CDS CDS       | 2.5   | 0.5   | 16.5  | R | COG4299 | Uncharacterized conserved protein                                                                                       |
| TS29Bif0648 CDS CDS    | 0.3   | 11.3  | 0.1   | R | COG4393 | Predicted membrane protein                                                                                              |
| Even1979 CDS CDS       | 0.8   | 32.4  | 0.1   | R | COG4422 | Bacteriophage protein gp37                                                                                              |
| Dfor0888 CDS CDS       | 10.0  | 1.0   | 33.1  | R | COG4472 | Uncharacterized protein conserved in bacteria                                                                           |
| TS28Rum02946 CDS CDS   | 9.0   | 1.0   | 29.8  | R | COG4485 | Predicted membrane protein                                                                                              |
| TS28Clo00565 CDS CDS   | 8.0   | 277.0 | 0.1   | R | COG4485 | Predicted membrane protein                                                                                              |
| TS28Dor1957 CDS CDS    | 1.0   | 45.0  | 0.1   | R | COG4485 | Predicted membrane protein                                                                                              |
| TS28Eub5363 CDS CDS    | 2.0   | 95.3  | 0.1   | R | COG4485 | Predicted membrane protein                                                                                              |
| TS28Fae12026 CDS CDS   | 1.0   | 58.5  | 0.1   | R | COG4485 | Predicted membrane protein                                                                                              |
| TS28Clo00756 CDS CDS   | 1.0   | 49.0  | 0.1   | R | COG4495 | Uncharacterized protein conserved in bacteria                                                                           |
| TS28RumUnc0548 CDS CDS | 0.5   | 25.0  | 0.1   | R | COG4603 | ABC-type uncharacterized transport system, permease component                                                           |
| Bdor2372 CDS CDS       | 19.5  | 2.0   | 32.2  | R | COG4642 | Uncharacterized protein conserved in bacteria                                                                           |
| TS29Rum10308 CDS CDS   | 6.0   | 1.0   | 19.8  | R | COG4667 | Predicted esterase of the alpha-beta hydrolase superfamily                                                              |
| TS29Rum00611 CDS CDS   | 2.0   | 0.3   | 19.8  | R | COG4716 | Myosin-crossreactive antigen                                                                                            |
| TS28Clo00490 CDS CDS   | 5.0   | 211.5 | 0.1   | R | COG4716 | Myosin-crossreactive antigen                                                                                            |
| TS28Fae13726 CDS CDS   | 1.0   | 50.0  | 0.1   | R | COG4716 | Myosin-crossreactive antigen                                                                                            |
| TS28Clo00736 CDS CDS   | 1.0   | 37.0  | 0.1   | R | COG4728 | Uncharacterized protein conserved in bacteria                                                                           |
| Msmi741293 CDS CDS     | 4.3   | 0.3   | 42.2  | R | COG4744 | Uncharacterized conserved protein                                                                                       |
| Msmi750390 CDS CDS     | 3.3   | 0.3   | 32.2  | R | COG4744 | Uncharacterized conserved protein                                                                                       |
| BactD11694 CDS CDS     | 14.3  | 1.0   | 47.4  | R | COG4747 | ACT domain-containing protein                                                                                           |
| Bdor0570 CDS CDS       | 5.2   | 1.0   | 17.2  | R | COG4804 | Uncharacterized conserved protein                                                                                       |
| TS29Bac00982 CDS CDS   | 5.0   | 1.0   | 16.5  | R | COG4804 | Uncharacterized conserved protein                                                                                       |
| Bsp1161711 CDS CDS     | 2.3   | 0.5   | 14.9  | R | COG4804 | Uncharacterized conserved protein                                                                                       |
| TS29Bac01072 CDS CDS   | 2.3   | 0.5   | 14.9  | R | COG4804 | Uncharacterized conserved protein                                                                                       |
| TS28Bac5883 CDS CDS    | 0.5   | 52.0  | 0.0   | R | COG4804 | Uncharacterized conserved protein                                                                                       |
| Csp5S21123 CDS CDS     | 0.3   | 23.0  | 0.0   | R | COG4805 | Uncharacterized protein conserved in bacteria                                                                           |
| Csei0185 CDS CDS       | 6.0   | 1.0   | 19.8  | R | COG4824 | Phage-related holin (Lysis protein)                                                                                     |
| TS28Fae21267 CDS CDS   | 26.0  | 3.0   | 28.7  | R | COG4832 | Uncharacterized conserved protein                                                                                       |
| Cspi1195 CDS CDS       | 63.0  | 1.0   | 208.3 | R | COG4856 | Uncharacterized protein conserved in bacteria                                                                           |
| Acol0976 CDS CDS       | 7.0   | 2.0   | 11.6  | R | COG4857 | Predicted kinase                                                                                                        |
| Buni1154 CDS CDS       | 8.8   | 2.5   | 11.7  | R | COG4864 | Uncharacterized protein conserved in bacteria                                                                           |
| TS28Bac3330 CDS CDS    | 8.8   | 2.5   | 11.7  | R | COG4864 | Uncharacterized protein conserved in bacteria                                                                           |
| Bdor1122 CDS CDS       | 8.3   | 2.7   | 10.3  | R | COG4866 | Uncharacterized conserved protein                                                                                       |
| TS28Bif5376 CDS CDS    | 0.7   | 26.2  | 0.1   | R | COG4868 | Uncharacterized protein conserved in bacteria                                                                           |
| Clep0429 CDS CDS       | 163.0 | 8.5   | 63.4  | R | COG4880 | Secreted protein containing C-terminal beta-propeller domain distantly related to WD-40 repeats                         |
| Dfor2715 CDS CDS       | 73.0  | 10.0  | 24.1  | R | COG4880 | Secreted protein containing C-terminal beta-propeller domain distantly related to WD-40 repeats                         |
| TS28Dor1882 CDS CDS    | 172.0 | 39.0  | 14.6  | R | COG4880 | Secreted protein containing C-terminal beta-propeller domain distantly related to WD-40 repeats                         |
| Msmi740702 CDS CDS     | 11.8  | 0.3   | 116.9 | R | COG4883 | Uncharacterized protein conserved in archaea                                                                            |
| Msmi750976 CDS CDS     | 21.5  | 3.3   | 21.3  | R | COG4883 | Uncharacterized protein conserved in archaea                                                                            |
| Rtor0725 CDS CDS       | 30.3  | 9.8   | 10.2  | R | COG4886 | Leucine-rich repeat (LRR) protein                                                                                       |
| Msmi750615 CDS CDS     | 4.0   | 0.6   | 22.7  | R | COG4907 | Predicted membrane protein                                                                                              |
| Msmi741063 CDS CDS     | 4.0   | 1.1   | 12.2  | R | COG4907 | Predicted membrane protein                                                                                              |
| TS28Fae21583 CDS CDS   | 3.0   | 183.3 | 0.1   | R | COG4913 | Uncharacterized protein conserved in bacteria                                                                           |
| TS28Bac6589 CDS CDS    | 6.3   | 1.5   | 14.0  | R | COG4946 | Uncharacterized protein related to the periplasmic component of the Tol biopolymer transport system                     |
| TS28Eub7288 CDS CDS    | 0.5   | 34.5  | 0.0   | R | COG4951 | Uncharacterized protein conserved in bacteria                                                                           |
| TS28Clo01183 CDS CDS   | 2.0   | 67.0  | 0.1   | R | COG5017 | Uncharacterized conserved protein                                                                                       |
| Csvm0815 CDS CDS       | 7.0   | 1.0   | 23.2  | R | COG5263 | FOG: Glucan-binding domain (YG repeat)                                                                                  |
| Cbol1236 CDS CDS       | 32.8  | 5.0   | 21.7  | R | COG5263 | FOG: Glucan-binding domain (YG repeat)                                                                                  |

|                                              |          |       |          |    |                         |                                                                                   |
|----------------------------------------------|----------|-------|----------|----|-------------------------|-----------------------------------------------------------------------------------|
| TS29Clo2651 CDS CDS                          | 9.0      | 2.0   | 14.9     | R  | COG5263                 | FOG: Glucan-binding domain (YG repeat)                                            |
| TS28Rum03315 CDS CDS                         | 2.0      | 74.0  | 0.1      | R  | COG5283 COG5412         | Phage-related tail protein Phage-related protein                                  |
| TS28Fae04439 CDS CDS                         | 1.0      | 46.0  | 0.1      | R  | COG5283 COG5412 COG5280 | Phage-related tail protein Phage-related protein Phage-related minor tail protein |
| TS28RumUnc1879 CDS CDS                       | 2.0      | 135.0 | 0.0      | R  | COG5283 COG5412 COG5280 | Phage-related tail protein Phage-related protein Phage-related minor tail protein |
| Dfor1552 CDS CDS                             | 9.0      | 2.0   | 14.9     | R  | COG5341                 | Uncharacterized protein conserved in bacteria                                     |
| TS28Fae01808 CDS CDS                         | 0.5      | 75.0  | 0.0      | R  | COG5412 COG5280         | Phage-related protein Phage-related minor tail protein                            |
| TS29Fae10219 CDS CDS                         | 8.0      | 2.0   | 13.2     | R  | COG5438                 | Predicted multitransmembrane protein                                              |
| Bdor3895 CDS CDS                             | 11.5     | 1.5   | 25.4     | R  | COG5464                 | Uncharacterized conserved protein                                                 |
| Bxy10019 CDS CDS                             | 2.7      | 0.5   | 17.6     | R  | COG5464                 | Uncharacterized conserved protein                                                 |
| Bste1283 CDS CDS                             | 24.0     | 6.0   | 13.2     | R  | COG5464                 | Uncharacterized conserved protein                                                 |
| Acol2972 CDS CDS                             | 3.0      | 104.0 | 0.1      | R  | COG5511                 | Bacteriophage capsid protein                                                      |
| Bova2285 CDS CDS                             | 6.0      | 1.0   | 19.8     | R  | COG5545                 | Predicted P-loop ATPase and inactivated derivatives                               |
| Bxyl0884 CDS CDS                             | 6.0      | 1.0   | 19.8     | R  | COG5545                 | Predicted P-loop ATPase and inactivated derivatives                               |
| Cnex2744 CDS CDS                             | 2.2      | 94.4  | 0.1      | R  | COG5545                 | Predicted P-loop ATPase and inactivated derivatives                               |
| Ccom0763 CDS CDS                             | 0.8      | 38.9  | 0.1      | R  | COG5545                 | Predicted P-loop ATPase and inactivated derivatives                               |
| Even0585 CDS CDS                             | 2.5      | 149.8 | 0.1      | R  | COG5545                 | Predicted P-loop ATPase and inactivated derivatives                               |
| FpraM2120212 CDS CDS                         | 0.4      | 26.9  | 0.1      | R  | COG5545                 | Predicted P-loop ATPase and inactivated derivatives                               |
| Cnex1526 CDS CDS                             | 0.4      | 28.5  | 0.0      | R  | COG5545                 | Predicted P-loop ATPase and inactivated derivatives                               |
| Ceut1813 CDS CDS                             | 0.3      | 97.2  | 0.0      | R  | COG5545                 | Predicted P-loop ATPase and inactivated derivatives                               |
| Bdor2374 CDS CDS                             | 41.5     | 3.0   | 45.7     | R  | COG5587                 | Uncharacterized conserved protein                                                 |
| TS28Fae04289 CDS CDS                         | 27,602.0 | 2.0   | 45,639.0 | NA | NA                      | hypothetical protein                                                              |
| TS28Par2562 CDS CDS                          | 4,019.0  | 1.0   | 13,290.6 | NA | NA                      | hypothetical protein                                                              |
| TS28Fae17789 CDS CDS                         | 7,989.0  | 2.0   | 13,209.5 | NA | NA                      | hypothetical protein                                                              |
| TS29Fae02022 CDS CDS                         | 11,443.5 | 5.0   | 7,568.6  | NA | NA                      | hypothetical protein                                                              |
| Ccom1560 CDS CDS                             | 2,277.9  | 1.0   | 7,532.9  | NA | NA                      | hypothetical protein                                                              |
| TS29Rum02227 CDS CDS                         | 1,723.0  | 1.0   | 5,697.8  | NA | NA                      | hypothetical protein                                                              |
| TS29Fae02023 CDS CDS                         | 1,595.7  | 1.0   | 5,276.8  | NA | NA                      | hypothetical protein                                                              |
| Robe2147 CDS CDS                             | 4,405.1  | 3.0   | 4,855.8  | NA | NA                      | hypothetical protein                                                              |
| TS29Fae01517 CDS CDS                         | 31,785.2 | 28.0  | 3,754.0  | NA | NA                      | hypothetical protein                                                              |
| TS29Fae05352 CDS CDS                         | 2,249.0  | 2.0   | 3,718.6  | NA | NA                      | hypothetical protein                                                              |
| Rgna2691 CDS CDS                             | 5,387.0  | 5.0   | 3,562.9  | NA | NA                      | hypothetical protein                                                              |
| TS29Fae09565 CDS CDS                         | 13,183.0 | 15.0  | 2,906.4  | NA | NA                      | hypothetical protein                                                              |
| TS28Fae18234 CDS CDS                         | 2,812.0  | 4.0   | 2,324.8  | NA | NA                      | hypothetical protein                                                              |
| TS29Fae00793 CDS CDS                         | 1,851.0  | 3.0   | 2,040.4  | NA | NA                      | hypothetical protein                                                              |
| TS29Fae05351 CDS CDS                         | 912.5    | 1.5   | 2,011.7  | NA | NA                      | hypothetical protein                                                              |
| TS28Fae18841 CDS CDS                         | 912.5    | 1.5   | 2,011.7  | NA | NA                      | hypothetical protein                                                              |
| TS28Rum15487 CDS CDS                         | 592.0    | 1.0   | 1,957.7  | NA | NA                      | hypothetical protein                                                              |
| TS28Rum10074 CDS CDS                         | 553.0    | 1.0   | 1,828.7  | NA | NA                      | hypothetical protein                                                              |
| TS29Fae03670 CDS CDS                         | 1,536.0  | 3.0   | 1,693.1  | NA | NA                      | hypothetical protein                                                              |
| TS28Bac7805 CDS CDS                          | 2,025.0  | 4.0   | 1,674.1  | NA | NA                      | hypothetical protein                                                              |
| BDI0358 CDS hypothetical                     | 982.0    | 2.0   | 1,623.7  | NA | NA                      | hypothetical protein                                                              |
| TS28Rum13907 CDS CDS                         | 1,918.5  | 5.5   | 1,153.5  | NA | NA                      | hypothetical protein                                                              |
| TS29Rum16880 CDS CDS                         | 1,918.5  | 5.5   | 1,153.5  | NA | NA                      | hypothetical protein                                                              |
| TS29Fae04643 CDS CDS                         | 1,286.5  | 4.0   | 1,063.6  | NA | NA                      | hypothetical protein                                                              |
| Acod0202 CDS CDS                             | 312.0    | 1.0   | 1,031.8  | NA | NA                      | hypothetical protein                                                              |
| TS28Rum04305 CDS CDS                         | 310.0    | 1.0   | 1,025.1  | NA | NA                      | hypothetical protein                                                              |
| TS28Rum10982 CDS CDS                         | 305.0    | 1.0   | 1,008.6  | NA | NA                      | hypothetical protein                                                              |
| Msm1017 CDS methvl-coenzym                   | 196.8    | 0.7   | 976.0    | NA | NA                      | hypothetical protein                                                              |
| Bste1270 CDS CDS                             | 143.0    | 0.5   | 945.8    | NA | NA                      | hypothetical protein                                                              |
| TS29Bac03469 CDS CDS                         | 143.0    | 0.5   | 945.8    | NA | NA                      | hypothetical protein                                                              |
| Bden1557 CDS CDS                             | 129.0    | 0.5   | 853.2    | NA | NA                      | hypothetical protein                                                              |
| TS28Rum04833 CDS CDS                         | 368.0    | 1.5   | 811.3    | NA | NA                      | hypothetical protein                                                              |
| Rtor0713 CDS CDS                             | 368.0    | 1.5   | 811.3    | NA | NA                      | hypothetical protein                                                              |
| TS29Rum18028 CDS CDS                         | 483.0    | 2.0   | 798.6    | NA | NA                      | hypothetical protein                                                              |
| Msm1018 CDS methvl-coenzym                   | 54.0     | 0.3   | 714.3    | NA | NA                      | hypothetical protein                                                              |
| Rbro1223 CDS CDS                             | 1,928.0  | 9.0   | 708.4    | NA | NA                      | hypothetical protein                                                              |
| TS29Fae06146 CDS CDS                         | 203.0    | 1.0   | 671.3    | NA | NA                      | hypothetical protein                                                              |
| TS28Al12041 CDS CDS                          | 1,001.5  | 5.0   | 662.4    | NA | NA                      | hypothetical protein                                                              |
| TS29Fae05350 CDS CDS                         | 1,394.0  | 7.0   | 658.6    | NA | NA                      | hypothetical protein                                                              |
| TS29Fae07012 CDS CDS                         | 2,822.0  | 15.0  | 622.1    | NA | NA                      | hypothetical protein                                                              |
| Bxyl0898 CDS CDS                             | 91.4     | 0.5   | 604.6    | NA | NA                      | hypothetical protein                                                              |
| TS28ErvUnc75 CDS CDS                         | 836.0    | 5.0   | 552.9    | NA | NA                      | hypothetical protein                                                              |
| Msm0884 CDS adhesin-like                     | 133.7    | 0.8   | 530.5    | NA | NA                      | hypothetical protein                                                              |
| TS29Dor0588 CDS CDS                          | 316.0    | 2.0   | 522.5    | NA | NA                      | hypothetical protein                                                              |
| Bdor2038 CDS CDS                             | 157.0    | 1.0   | 519.2    | NA | NA                      | hypothetical protein                                                              |
| TS29Rum16879 CDS CDS                         | 1,458.0  | 10.0  | 482.2    | NA | NA                      | hypothetical protein                                                              |
| TS29Fae05353 CDS CDS                         | 1,248.0  | 9.0   | 458.6    | NA | NA                      | hypothetical protein                                                              |
| BFvch462748 CDS hypothetical                 | 402.5    | 3.0   | 443.7    | NA | NA                      | hypothetical protein                                                              |
| Acod1370 CDS CDS                             | 122.0    | 1.0   | 403.4    | NA | NA                      | hypothetical protein                                                              |
| TS29Fae02024 CDS CDS                         | 363.3    | 3.0   | 400.5    | NA | NA                      | hypothetical protein                                                              |
| TS28RumUnc0888 CDS CDS                       | 119.0    | 1.0   | 393.5    | NA | NA                      | hypothetical protein                                                              |
| TS28Rum04903 CDS CDS                         | 2,822.0  | 24.0  | 388.8    | NA | NA                      | hypothetical protein                                                              |
| TS28Col1110 CDS CDS                          | 884.0    | 8.0   | 365.4    | NA | NA                      | hypothetical protein                                                              |
| Rlac1489 CDS CDS                             | 651.5    | 6.0   | 359.1    | NA | NA                      | hypothetical protein                                                              |
| TS28Fae04055 CDS CDS                         | 106.0    | 1.0   | 350.5    | NA | NA                      | hypothetical protein                                                              |
| TS28Eub3781 CDS CDS                          | 106.0    | 1.0   | 350.5    | NA | NA                      | hypothetical protein                                                              |
| TS29Rum18027 CDS CDS                         | 201.0    | 2.0   | 332.3    | NA | NA                      | hypothetical protein                                                              |
| TS29Fae01516 CDS CDS                         | 1,280.5  | 13.5  | 313.7    | NA | NA                      | hypothetical protein                                                              |
| TS28Fae00002 CDS CDS                         | 187.0    | 2.0   | 309.1    | NA | NA                      | hypothetical protein                                                              |
| TS28Clo06847 CDS CDS                         | 170.0    | 2.0   | 281.1    | NA | NA                      | hypothetical protein                                                              |
| BDI0370 CDS hypothetical                     | 675.0    | 8.0   | 279.0    | NA | NA                      | hypothetical protein                                                              |
| Msm0542 CDS methvlenetetrahydromethanopterin | 151.0    | 1.8   | 272.5    | NA | NA                      | hypothetical protein                                                              |
| Msm0221 CDS adhesin-like                     | 81.8     | 1.0   | 270.5    | NA | NA                      | hypothetical protein                                                              |
| BL1101 CDS hypothetical                      | 230.0    | 3.0   | 253.5    | NA | NA                      | hypothetical protein                                                              |
| TS29Bac00036 CDS CDS                         | 141.5    | 2.0   | 234.0    | NA | NA                      | hypothetical protein                                                              |
| BFvch461128 CDS hypothetical                 | 210.0    | 3.0   | 231.5    | NA | NA                      | hypothetical protein                                                              |
| BFnc1040 CDS hypothetical                    | 210.0    | 3.0   | 231.5    | NA | NA                      | hypothetical protein                                                              |
| Cbar0702 CDS CDS                             | 70.0     | 1.0   | 231.5    | NA | NA                      | hypothetical protein                                                              |
| TS28RumUnc0887 CDS CDS                       | 70.0     | 1.0   | 231.5    | NA | NA                      | hypothetical protein                                                              |
| TS29Fae08572 CDS CDS                         | 554.0    | 8.0   | 229.0    | NA | NA                      | hypothetical protein                                                              |

|                                          |         |      |       |    |    |                      |
|------------------------------------------|---------|------|-------|----|----|----------------------|
| Msm1349 CDS F420H2-oxidase/ flavoprotein | 57.1    | 0.8  | 226.7 | NA | NA | hypothetical protein |
| Dlon0995 CDS CDS                         | 135.0   | 2.0  | 223.2 | NA | NA | hypothetical protein |
| Msmi750779 CDS CDS                       | 176.5   | 2.7  | 218.9 | NA | NA | hypothetical protein |
| Msm0844 CDS histone                      | 82.2    | 1.3  | 217.3 | NA | NA | hypothetical protein |
| TS29Fae00137 CDS CDS                     | 65.5    | 1.0  | 216.6 | NA | NA | hypothetical protein |
| Bste1533 CDS CDS                         | 128.5   | 2.0  | 212.5 | NA | NA | hypothetical protein |
| TS29Fae08622 CDS CDS                     | 64.2    | 1.0  | 212.2 | NA | NA | hypothetical protein |
| TS29Fae08440 CDS CDS                     | 62.0    | 1.0  | 205.0 | NA | NA | hypothetical protein |
| Msm1009 CDS tetrahydromethanopterin      | 15.3    | 0.3  | 201.7 | NA | NA | hypothetical protein |
| TS28Met0362 CDS CDS                      | 15.3    | 0.3  | 201.7 | NA | NA | hypothetical protein |
| TS28Fae19195 CDS CDS                     | 302.0   | 5.0  | 199.7 | NA | NA | hypothetical protein |
| TS28Par0058 CDS CDS                      | 29.2    | 0.5  | 192.9 | NA | NA | hypothetical protein |
| RintL13873 CDS CDS                       | 57.5    | 1.0  | 190.1 | NA | NA | hypothetical protein |
| EUBREC1396 CDS hypothetical              | 27.5    | 0.5  | 181.9 | NA | NA | hypothetical protein |
| Pmer2646 CDS CDS                         | 27.2    | 0.5  | 179.7 | NA | NA | hypothetical protein |
| BVU2266 CDS hypothetical                 | 27.0    | 0.5  | 178.6 | NA | NA | hypothetical protein |
| Msm1019 CDS methvl-coenzvme              | 175.4   | 3.3  | 178.5 | NA | NA | hypothetical protein |
| b3498 CDS oligonoptidase                 | 26.0    | 0.5  | 172.0 | NA | NA | hypothetical protein |
| Bdor0668 CDS CDS                         | 50.5    | 1.0  | 167.0 | NA | NA | hypothetical protein |
| Msm0550 CDS protein                      | 12.5    | 0.3  | 165.3 | NA | NA | hypothetical protein |
| BVU1389 CDS 30S                          | 641.3   | 13.0 | 163.1 | NA | NA | hypothetical protein |
| TS28Col0962 CDS CDS                      | 529.0   | 11.0 | 159.0 | NA | NA | hypothetical protein |
| TS28Fae18976 CDS CDS                     | 480.0   | 10.0 | 158.7 | NA | NA | hypothetical protein |
| Msmi741566 CDS CDS                       | 111.3   | 2.3  | 157.7 | NA | NA | hypothetical protein |
| Msmi750152 CDS CDS                       | 111.3   | 2.3  | 157.7 | NA | NA | hypothetical protein |
| Bdor0683 CDS CDS                         | 190.5   | 4.0  | 157.5 | NA | NA | hypothetical protein |
| TS28Col02074 CDS CDS                     | 136.0   | 3.0  | 149.9 | NA | NA | hypothetical protein |
| Msm0666 CDS hypothetical                 | 11.0    | 0.3  | 145.5 | NA | NA | hypothetical protein |
| TS28Fae16003 CDS CDS                     | 171.0   | 4.0  | 141.4 | NA | NA | hypothetical protein |
| Msm1544 CDS lipopolysaccharide           | 10.7    | 0.3  | 141.1 | NA | NA | hypothetical protein |
| TS28Ali0695 CDS CDS                      | 169.0   | 4.0  | 139.7 | NA | NA | hypothetical protein |
| TS29Rum17607 CDS CDS                     | 83.0    | 2.0  | 137.2 | NA | NA | hypothetical protein |
| TS28Ali0057 CDS CDS                      | 124.0   | 3.0  | 136.7 | NA | NA | hypothetical protein |
| Msm1223 CDS carbonic                     | 10.3    | 0.3  | 135.6 | NA | NA | hypothetical protein |
| Pmer0925 CDS CDS                         | 41.0    | 1.0  | 135.6 | NA | NA | hypothetical protein |
| TS28Dor0749 CDS CDS                      | 122.0   | 3.0  | 134.5 | NA | NA | hypothetical protein |
| EUBREC3394 CDS hypothetical              | 20.0    | 0.5  | 132.3 | NA | NA | hypothetical protein |
| Msmi750378 CDS CDS                       | 26.3    | 0.7  | 130.2 | NA | NA | hypothetical protein |
| Bdor0047 CDS CDS                         | 39.0    | 1.0  | 129.0 | NA | NA | hypothetical protein |
| Bdor2768 CDS CDS                         | 77.3    | 2.0  | 127.7 | NA | NA | hypothetical protein |
| b3476 CDS nickel                         | 19.0    | 0.5  | 125.7 | NA | NA | hypothetical protein |
| TS29Fae08068 CDS CDS                     | 76.0    | 2.0  | 125.7 | NA | NA | hypothetical protein |
| TS28Ali0655 CDS CDS                      | 600.0   | 16.0 | 124.0 | NA | NA | hypothetical protein |
| Bste1192 CDS CDS                         | 36.0    | 1.0  | 119.0 | NA | NA | hypothetical protein |
| TS28Col0105 CDS CDS                      | 35.0    | 1.0  | 115.7 | NA | NA | hypothetical protein |
| b3056 CDS fused                          | 17.5    | 0.5  | 115.7 | NA | NA | hypothetical protein |
| TS29Rum07439 CDS CDS                     | 11.2    | 0.3  | 110.8 | NA | NA | hypothetical protein |
| Rtor0839 CDS CDS                         | 11.2    | 0.3  | 110.8 | NA | NA | hypothetical protein |
| Rtor2195 CDS CDS                         | 11.2    | 0.3  | 110.8 | NA | NA | hypothetical protein |
| TS29Bif3379 CDS CDS                      | 230.0   | 7.0  | 108.7 | NA | NA | hypothetical protein |
| TS28Bac5720 CDS CDS                      | 16.3    | 0.5  | 108.0 | NA | NA | hypothetical protein |
| Msmi741305 CDS CDS                       | 32.6    | 1.0  | 107.8 | NA | NA | hypothetical protein |
| Msm1008 CDS tetrahydromethanopterin      | 48.8    | 1.5  | 107.5 | NA | NA | hypothetical protein |
| Pmer2753 CDS CDS                         | 65.0    | 2.0  | 107.5 | NA | NA | hypothetical protein |
| b3530 CDS cellulose                      | 16.0    | 0.5  | 105.8 | NA | NA | hypothetical protein |
| TS28Fae11007 CDS CDS                     | 32.0    | 1.0  | 105.8 | NA | NA | hypothetical protein |
| Dfor0044 CDS CDS                         | 32.0    | 1.0  | 105.8 | NA | NA | hypothetical protein |
| TS28Rum15904 CDS CDS                     | 222.0   | 7.0  | 104.9 | NA | NA | hypothetical protein |
| FpraM2121587 CDS CDS                     | 62.8    | 2.0  | 103.8 | NA | NA | hypothetical protein |
| TS28Fae15723 CDS CDS                     | 313.2   | 10.0 | 103.6 | NA | NA | hypothetical protein |
| BVU3832 CDS hypothetical                 | 46.8    | 1.5  | 103.2 | NA | NA | hypothetical protein |
| Msmi751003 CDS CDS                       | 78.0    | 2.5  | 103.2 | NA | NA | hypothetical protein |
| TS28Fae04551 CDS CDS                     | 248.0   | 8.0  | 102.5 | NA | NA | hypothetical protein |
| CspM6210398 CDS CDS                      | 31.0    | 1.0  | 102.5 | NA | NA | hypothetical protein |
| TS29Fae08439 CDS CDS                     | 216.0   | 7.0  | 102.0 | NA | NA | hypothetical protein |
| Bege0284 CDS CDS                         | 10.2    | 0.3  | 101.5 | NA | NA | hypothetical protein |
| TS29Fae08624 CDS CDS                     | 122.5   | 4.0  | 101.3 | NA | NA | hypothetical protein |
| BVU1960 CDS isocitrate                   | 20.3    | 0.7  | 100.9 | NA | NA | hypothetical protein |
| TS28Ali2040 CDS CDS                      | 1,817.5 | 60.0 | 100.2 | NA | NA | hypothetical protein |
| CspL2189 CDS CDS                         | 120.3   | 4.0  | 99.5  | NA | NA | hypothetical protein |
| Msm0104 CDS hypothetical                 | 10.0    | 0.3  | 99.2  | NA | NA | hypothetical protein |
| Msm0822 CDS photosynthetic               | 7.5     | 0.3  | 99.2  | NA | NA | hypothetical protein |
| TS29Bac11180 CDS CDS                     | 30.0    | 1.0  | 99.2  | NA | NA | hypothetical protein |
| Msmi740970 CDS CDS                       | 7.5     | 0.3  | 99.2  | NA | NA | hypothetical protein |
| Msmi750710 CDS CDS                       | 7.5     | 0.3  | 99.2  | NA | NA | hypothetical protein |
| BVU3944 CDS putative                     | 298.5   | 10.0 | 98.7  | NA | NA | hypothetical protein |
| TS28Fae07911 CDS CDS                     | 59.0    | 2.0  | 97.6  | NA | NA | hypothetical protein |
| Bdor2833 CDS CDS                         | 29.0    | 1.0  | 95.9  | NA | NA | hypothetical protein |
| b3409 CDS fused                          | 14.3    | 0.5  | 94.8  | NA | NA | hypothetical protein |
| Bdor2539 CDS CDS                         | 28.5    | 1.0  | 94.2  | NA | NA | hypothetical protein |
| TS28Fae20214 CDS CDS                     | 28.5    | 1.0  | 94.2  | NA | NA | hypothetical protein |
| BVU3539 CDS superoxide                   | 142.0   | 5.0  | 93.9  | NA | NA | hypothetical protein |
| TS28Rum10073 CDS CDS                     | 85.0    | 3.0  | 93.7  | NA | NA | hypothetical protein |
| BVU4068 CDS hypothetical                 | 196.5   | 7.0  | 92.8  | NA | NA | hypothetical protein |
| Acol2751 CDS CDS                         | 14.0    | 0.5  | 92.6  | NA | NA | hypothetical protein |
| Pmer0290 CDS CDS                         | 14.0    | 0.5  | 92.6  | NA | NA | hypothetical protein |
| BVU3949 CDS glucose-1-phosphate          | 14.0    | 0.5  | 92.6  | NA | NA | hypothetical protein |
| Msm1015 CDS methvl-coenzvme              | 106.3   | 3.8  | 91.7  | NA | NA | hypothetical protein |
| Dfor0622 CDS CDS                         | 13.8    | 0.5  | 91.5  | NA | NA | hypothetical protein |
| Dfor2068 CDS CDS                         | 13.8    | 0.5  | 91.5  | NA | NA | hypothetical protein |
| TS28Fae04550 CDS CDS                     | 82.0    | 3.0  | 90.4  | NA | NA | hypothetical protein |
| Buni1677 CDS CDS                         | 76.7    | 2.8  | 89.5  | NA | NA | hypothetical protein |



|                                              |         |      |      |    |    |                      |
|----------------------------------------------|---------|------|------|----|----|----------------------|
| TS29Bac08434/CDS/CDS                         | 76.7    | 2.8  | 89.5 | NA | NA | hypothetical protein |
| Bdor2612/CDS/CDS                             | 13.5    | 0.5  | 89.3 | NA | NA | hypothetical protein |
| CspSS21224/CDS/CDS                           | 27.0    | 1.0  | 89.3 | NA | NA | hypothetical protein |
| TS28Par1632/CDS/CDS                          | 13.5    | 0.5  | 89.3 | NA | NA | hypothetical protein |
| b4117/CDS biodegradative                     | 13.5    | 0.5  | 89.3 | NA | NA | hypothetical protein |
| TS28Ali0694/CDS/CDS                          | 1,233.0 | 46.0 | 88.6 | NA | NA | hypothetical protein |
| TS28Ali2038/CDS/CDS                          | 562.0   | 21.0 | 88.5 | NA | NA | hypothetical protein |
| Msm1406/CDS mol y b denum                    | 6.7     | 0.3  | 88.2 | NA | NA | hypothetical protein |
| TS28Rum07281/CDS/CDS                         | 53.0    | 2.0  | 87.6 | NA | NA | hypothetical protein |
| TS28Bac1165/CDS/CDS                          | 26.3    | 1.0  | 87.1 | NA | NA | hypothetical protein |
| TS29Rum10730/CDS/CDS                         | 39.5    | 1.5  | 87.1 | NA | NA | hypothetical protein |
| Msm0807/CDS polar                            | 19.8    | 0.8  | 87.1 | NA | NA | hypothetical protein |
| Aco11441/CDS/CDS                             | 26.0    | 1.0  | 86.0 | NA | NA | hypothetical protein |
| TS28Clo08426/CDS/CDS                         | 52.0    | 2.0  | 86.0 | NA | NA | hypothetical protein |
| TS28Ali1833/CDS/CDS                          | 26.0    | 1.0  | 86.0 | NA | NA | hypothetical protein |
| BactD13479/CDS/CDS                           | 13.0    | 0.5  | 86.0 | NA | NA | hypothetical protein |
| b0586/CDS enterobactin                       | 13.0    | 0.5  | 86.0 | NA | NA | hypothetical protein |
| BFvch462844/CDS hypothetical                 | 13.0    | 0.5  | 86.0 | NA | NA | hypothetical protein |
| TS29Bac07886/CDS/CDS                         | 12.8    | 0.5  | 84.9 | NA | NA | hypothetical protein |
| Bxyl3210/CDS/CDS                             | 12.8    | 0.5  | 84.9 | NA | NA | hypothetical protein |
| TS28Par2296/CDS/CDS                          | 101.3   | 4.0  | 83.8 | NA | NA | hypothetical protein |
| Msm1006/CDS hypothetical                     | 6.3     | 0.3  | 83.3 | NA | NA | hypothetical protein |
| TS29Fae09944/CDS/CDS                         | 12.5    | 0.5  | 82.7 | NA | NA | hypothetical protein |
| Msmi750941/CDS/CDS                           | 6.3     | 0.3  | 82.7 | NA | NA | hypothetical protein |
| TS28Clo07265/CDS/CDS                         | 75.0    | 3.0  | 82.7 | NA | NA | hypothetical protein |
| Msmi740190/CDS/CDS                           | 6.3     | 0.3  | 82.7 | NA | NA | hypothetical protein |
| TS29Rum03677/CDS/CDS                         | 25.0    | 1.0  | 82.7 | NA | NA | hypothetical protein |
| Msm1016/CDS methyl-coenzym                   | 112.4   | 4.5  | 82.6 | NA | NA | hypothetical protein |
| TS28Fae22715/CDS/CDS                         | 489.0   | 20.0 | 80.9 | NA | NA | hypothetical protein |
| Msm1274/CDS predicted                        | 8.1     | 0.3  | 80.5 | NA | NA | hypothetical protein |
| TS28Clo02078/CDS/CDS                         | 145.0   | 6.0  | 79.9 | NA | NA | hypothetical protein |
| Bdor3553/CDS/CDS                             | 48.3    | 2.0  | 79.9 | NA | NA | hypothetical protein |
| TS28Rum11980/CDS/CDS                         | 217.0   | 9.0  | 79.7 | NA | NA | hypothetical protein |
| Msmi740853/CDS/CDS                           | 18.0    | 0.8  | 79.4 | NA | NA | hypothetical protein |
| TS29Fae01541/CDS/CDS                         | 144.0   | 6.0  | 79.4 | NA | NA | hypothetical protein |
| TS28Fae03563/CDS/CDS                         | 95.5    | 4.0  | 79.0 | NA | NA | hypothetical protein |
| TS28Ali1507/CDS/CDS                          | 286.0   | 12.0 | 78.8 | NA | NA | hypothetical protein |
| TS29Rum03899/CDS/CDS                         | 71.0    | 3.0  | 78.3 | NA | NA | hypothetical protein |
| Bdor1900/CDS/CDS                             | 508.5   | 22.0 | 76.4 | NA | NA | hypothetical protein |
| TS28Bac6363/CDS/CDS                          | 23.0    | 1.0  | 76.1 | NA | NA | hypothetical protein |
| Bste2123/CDS/CDS                             | 23.0    | 1.0  | 76.1 | NA | NA | hypothetical protein |
| Bdor3578/CDS/CDS                             | 11.5    | 0.5  | 76.1 | NA | NA | hypothetical protein |
| Cbar2665/CDS/CDS                             | 23.0    | 1.0  | 76.1 | NA | NA | hypothetical protein |
| BVU3280/CDS S05                              | 45.5    | 2.0  | 75.2 | NA | NA | hypothetical protein |
| Bova3105/CDS/CDS                             | 34.0    | 1.5  | 75.0 | NA | NA | hypothetical protein |
| b0497/CDS rhsD                               | 22.2    | 1.0  | 73.3 | NA | NA | hypothetical protein |
| Rbro0053/CDS/CDS                             | 14.8    | 0.7  | 73.2 | NA | NA | hypothetical protein |
| FpraM2121034/CDS/CDS                         | 11.0    | 0.5  | 72.8 | NA | NA | hypothetical protein |
| TS29Clo2882/CDS/CDS                          | 22.0    | 1.0  | 72.8 | NA | NA | hypothetical protein |
| TS29Fae08441/CDS/CDS                         | 11.0    | 0.5  | 72.8 | NA | NA | hypothetical protein |
| BactD12196/CDS/CDS                           | 22.0    | 1.0  | 72.8 | NA | NA | hypothetical protein |
| TS29Rum14197/CDS/CDS                         | 44.0    | 2.0  | 72.8 | NA | NA | hypothetical protein |
| Msmi750226/CDS/CDS                           | 5.4     | 0.3  | 71.7 | NA | NA | hypothetical protein |
| BVU0762/CDS putative                         | 43.0    | 2.0  | 71.1 | NA | NA | hypothetical protein |
| BVU2582/CDS ribonuclease                     | 17.7    | 0.8  | 70.1 | NA | NA | hypothetical protein |
| TS28Bac7374/CDS/CDS                          | 21.2    | 1.0  | 70.1 | NA | NA | hypothetical protein |
| BactD13476/CDS/CDS                           | 21.2    | 1.0  | 70.0 | NA | NA | hypothetical protein |
| TS28Par1295/CDS/CDS                          | 7.0     | 0.3  | 69.4 | NA | NA | hypothetical protein |
| TS28RumUnc0591/CDS/CDS                       | 21.0    | 1.0  | 69.4 | NA | NA | hypothetical protein |
| b2503/CDS predicted                          | 10.5    | 0.5  | 69.4 | NA | NA | hypothetical protein |
| TS28Fae04304/CDS/CDS                         | 21.0    | 1.0  | 69.4 | NA | NA | hypothetical protein |
| BVU0462/CDS malate                           | 72.7    | 3.5  | 68.7 | NA | NA | hypothetical protein |
| Bova3103/CDS/CDS                             | 10.3    | 0.5  | 68.3 | NA | NA | hypothetical protein |
| BactD11217/CDS/CDS                           | 6.8     | 0.3  | 67.3 | NA | NA | hypothetical protein |
| Msm0706/CDS ribosomal                        | 20.3    | 1.0  | 67.2 | NA | NA | hypothetical protein |
| RintL13367/CDS/CDS                           | 6.7     | 0.3  | 66.1 | NA | NA | hypothetical protein |
| Cbar0932/CDS/CDS                             | 20.0    | 1.0  | 66.1 | NA | NA | hypothetical protein |
| Msm0142/CDS predicted                        | 5.0     | 0.3  | 66.1 | NA | NA | hypothetical protein |
| TS28Ali1674/CDS/CDS                          | 280.0   | 14.0 | 66.1 | NA | NA | hypothetical protein |
| TS28Clo02075/CDS/CDS                         | 259.0   | 13.0 | 65.9 | NA | NA | hypothetical protein |
| TS28Bac0803/CDS/CDS                          | 9.8     | 0.5  | 65.0 | NA | NA | hypothetical protein |
| TS28Ali1761/CDS/CDS                          | 98.0    | 5.0  | 64.8 | NA | NA | hypothetical protein |
| TS28Rum01946/CDS/CDS                         | 39.0    | 2.0  | 64.5 | NA | NA | hypothetical protein |
| TS29Bac01387/CDS/CDS                         | 19.3    | 1.0  | 63.9 | NA | NA | hypothetical protein |
| TS29Fae03719/CDS/CDS                         | 9.7     | 0.5  | 63.9 | NA | NA | hypothetical protein |
| TS28Bac8384/CDS/CDS                          | 38.5    | 2.0  | 63.7 | NA | NA | hypothetical protein |
| TS28Ali2037/CDS/CDS                          | 306.0   | 16.0 | 63.2 | NA | NA | hypothetical protein |
| TS28Ali0286/CDS/CDS                          | 57.0    | 3.0  | 62.8 | NA | NA | hypothetical protein |
| BVU0572/CDS hypothetical                     | 19.0    | 1.0  | 62.8 | NA | NA | hypothetical protein |
| b3234/CDS serine                             | 19.0    | 1.0  | 62.8 | NA | NA | hypothetical protein |
| Msm0320/CDS predicted                        | 4.8     | 0.3  | 62.8 | NA | NA | hypothetical protein |
| HPAG10210/CDS outer                          | 19.0    | 1.0  | 62.8 | NA | NA | hypothetical protein |
| b0436/CDS peptidyl-prolyl                    | 19.0    | 1.0  | 62.8 | NA | NA | hypothetical protein |
| TS28Clo08420/CDS/CDS                         | 94.0    | 5.0  | 62.2 | NA | NA | hypothetical protein |
| Msm1551/CDS glucosamine-fructose-6-phosphate | 12.5    | 0.7  | 62.0 | NA | NA | hypothetical protein |
| b3956/CDS phosphoenolpyruvate                | 18.5    | 1.0  | 61.2 | NA | NA | hypothetical protein |
| BVU3326/CDS putative                         | 18.5    | 1.0  | 61.2 | NA | NA | hypothetical protein |
| TS28Fae04509/CDS/CDS                         | 92.0    | 5.0  | 60.8 | NA | NA | hypothetical protein |
| EUBREC1884/CDS hypothetical                  | 73.3    | 4.0  | 60.6 | NA | NA | hypothetical protein |
| BVU4064/CDS hypothetical                     | 54.5    | 3.0  | 60.1 | NA | NA | hypothetical protein |
| Msm1730/CDS hypothetical                     | 36.3    | 2.0  | 59.9 | NA | NA | hypothetical protein |
| TS28Fae22716/CDS/CDS                         | 163.0   | 9.0  | 59.9 | NA | NA | hypothetical protein |

|                                                             |       |      |      |    |    |                      |
|-------------------------------------------------------------|-------|------|------|----|----|----------------------|
| Bova0460 CDS CDS                                            | 18.1  | 1.0  | 59.7 | NA | NA | hypothetical protein |
| BL1481 CDS hypothetical                                     | 6.0   | 0.81 | 59.5 | NA | NA | hypothetical protein |
| HPAG10035 CDS NADH-ubiquinone                               | 18.0  | 1.0  | 59.5 | NA | NA | hypothetical protein |
| TS28Fae05431 CDS CDS                                        | 90.0  | 5.0  | 59.5 | NA | NA | hypothetical protein |
| b4317 CDS outer                                             | 9.0   | 0.5  | 59.5 | NA | NA | hypothetical protein |
| Msm1153 CDS cation                                          | 4.5   | 0.3  | 59.5 | NA | NA | hypothetical protein |
| TS29Fae09418 CDS CDS                                        | 9.0   | 0.5  | 59.5 | NA | NA | hypothetical protein |
| HPAG10388 CDS Holliday                                      | 18.0  | 1.0  | 59.5 | NA | NA | hypothetical protein |
| Dlon0992 CDS CDS                                            | 9.0   | 0.5  | 59.5 | NA | NA | hypothetical protein |
| Msm1336 CDS heterodisulfide                                 | 59.2  | 3.3  | 58.7 | NA | NA | hypothetical protein |
| PRABACT JOHN1057 CDS CDS                                    | 53.0  | 3.0  | 58.4 | NA | NA | hypothetical protein |
| BVU0311 CDS putative                                        | 23.5  | 1.3  | 58.3 | NA | NA | hypothetical protein |
| TS28Bif3719 CDS CDS                                         | 229.0 | 13.0 | 58.3 | NA | NA | hypothetical protein |
| BVU0325 CDS electron                                        | 26.3  | 1.5  | 58.1 | NA | NA | hypothetical protein |
| TS28Met1690 CDS CDS                                         | 17.5  | 1.0  | 57.9 | NA | NA | hypothetical protein |
| TS28Bac5675 CDS CDS                                         | 17.5  | 1.0  | 57.9 | NA | NA | hypothetical protein |
| Msm0515 CDS methanol:cobalamin                              | 25.8  | 1.5  | 57.0 | NA | NA | hypothetical protein |
| TS28Bif3718 CDS CDS                                         | 119.0 | 7.0  | 56.2 | NA | NA | hypothetical protein |
| TS28Clo06517 CDS CDS                                        | 17.0  | 1.0  | 56.2 | NA | NA | hypothetical protein |
| TS29Fae05195 CDS CDS                                        | 8.5   | 0.5  | 56.2 | NA | NA | hypothetical protein |
| Bdor1541 CDS CDS                                            | 34.0  | 2.0  | 56.2 | NA | NA | hypothetical protein |
| Msm0933 CDS cobalamin-5-phosphate                           | 4.3   | 0.3  | 56.2 | NA | NA | hypothetical protein |
| TS28Bac4438 CDS CDS                                         | 17.0  | 1.0  | 56.2 | NA | NA | hypothetical protein |
| Msm1562 CDS acetyl-CoA                                      | 8.4   | 0.5  | 55.6 | NA | NA | hypothetical protein |
| TS28Ali0449 CDS CDS                                         | 84.0  | 5.0  | 55.6 | NA | NA | hypothetical protein |
| BactD22816 CDS CDS                                          | 25.0  | 1.5  | 55.1 | NA | NA | hypothetical protein |
| TS28Clo05689 CDS CDS                                        | 198.0 | 12.0 | 54.6 | NA | NA | hypothetical protein |
| Pmer0292 CDS CDS                                            | 33.0  | 2.0  | 54.6 | NA | NA | hypothetical protein |
| BVU0477 CDS pyridoxal                                       | 13.5  | 0.8  | 53.6 | NA | NA | hypothetical protein |
| Msm0867 CDS AMMECR1-related                                 | 4.1   | 0.3  | 53.6 | NA | NA | hypothetical protein |
| BVU3983 CDS two-component                                   | 177.0 | 11.0 | 53.2 | NA | NA | hypothetical protein |
| TS29Bac03392 CDS CDS                                        | 5.3   | 0.3  | 52.9 | NA | NA | hypothetical protein |
| TS28Par0489 CDS CDS                                         | 24.0  | 1.5  | 52.9 | NA | NA | hypothetical protein |
| TS28Bac6789 CDS CDS                                         | 16.0  | 1.0  | 52.9 | NA | NA | hypothetical protein |
| HPAG10975 CDS hypothetical                                  | 16.0  | 1.0  | 52.9 | NA | NA | hypothetical protein |
| TS28Par0864 CDS CDS                                         | 16.0  | 1.0  | 52.9 | NA | NA | hypothetical protein |
| Dlon2637 CDS CDS                                            | 32.0  | 2.0  | 52.9 | NA | NA | hypothetical protein |
| RintL10294 CDS CDS                                          | 16.0  | 1.0  | 52.9 | NA | NA | hypothetical protein |
| HPAG11373 CDS 50S                                           | 16.0  | 1.0  | 52.9 | NA | NA | hypothetical protein |
| Msm1421 CDS hypothetical                                    | 4.0   | 0.3  | 52.9 | NA | NA | hypothetical protein |
| Msm1741511 CDS CDS                                          | 4.0   | 0.3  | 52.9 | NA | NA | hypothetical protein |
| HPAG10853 CDS flagellar                                     | 16.0  | 1.0  | 52.9 | NA | NA | hypothetical protein |
| TS28Clo08395 CDS CDS                                        | 32.0  | 2.0  | 52.9 | NA | NA | hypothetical protein |
| TS28Met0841 CDS CDS                                         | 16.0  | 1.0  | 52.9 | NA | NA | hypothetical protein |
| b0916 CDS conserved                                         | 8.0   | 0.5  | 52.9 | NA | NA | hypothetical protein |
| b0830 CDS predicted                                         | 8.0   | 0.5  | 52.9 | NA | NA | hypothetical protein |
| Cbar2626 CDS CDS                                            | 16.0  | 1.0  | 52.9 | NA | NA | hypothetical protein |
| Pmer3585 CDS CDS                                            | 16.0  | 1.0  | 52.9 | NA | NA | hypothetical protein |
| Bdor1385 CDS CDS                                            | 31.7  | 2.0  | 52.4 | NA | NA | hypothetical protein |
| Msm1227 CDS phosphoribosylamine-glycine                     | 3.9   | 0.3  | 51.8 | NA | NA | hypothetical protein |
| TS29Bac03345 CDS CDS                                        | 5.2   | 0.3  | 51.5 | NA | NA | hypothetical protein |
| TS28Clo02080 CDS CDS                                        | 187.0 | 12.0 | 51.5 | NA | NA | hypothetical protein |
| TS28Ali1770 CDS CDS                                         | 77.5  | 5.0  | 51.3 | NA | NA | hypothetical protein |
| b4242 CDS magnesium                                         | 15.5  | 1.0  | 51.3 | NA | NA | hypothetical protein |
| TS29Bac08221 CDS CDS                                        | 15.5  | 1.0  | 51.3 | NA | NA | hypothetical protein |
| TS28Ali0659 CDS CDS                                         | 464.5 | 30.0 | 51.2 | NA | NA | hypothetical protein |
| Msm1547 CDS phosphoribosylaminoimidazole-succinocarboxamide | 5.2   | 0.3  | 51.1 | NA | NA | hypothetical protein |
| BVU0053 CDS hypothetical                                    | 7.7   | 0.5  | 50.7 | NA | NA | hypothetical protein |
| Dlon0163 CDS CDS                                            | 23.0  | 1.5  | 50.7 | NA | NA | hypothetical protein |
| TS28Fae22763 CDS CDS                                        | 7.7   | 0.5  | 50.7 | NA | NA | hypothetical protein |
| TS28Fae20009 CDS CDS                                        | 210.5 | 13.8 | 50.3 | NA | NA | hypothetical protein |
| TS29Fae08124 CDS CDS                                        | 210.5 | 13.8 | 50.3 | NA | NA | hypothetical protein |
| TS28Rum01945 CDS CDS                                        | 196.0 | 13.0 | 49.9 | NA | NA | hypothetical protein |
| Rbro0564 CDS CDS                                            | 5.0   | 0.3  | 49.6 | NA | NA | hypothetical protein |
| Vvad5483385 CDS CDS                                         | 5.0   | 0.3  | 49.6 | NA | NA | hypothetical protein |
| b2076 CDS multidrug                                         | 15.0  | 1.0  | 49.6 | NA | NA | hypothetical protein |
| TS28Ali0047 CDS CDS                                         | 15.0  | 1.0  | 49.6 | NA | NA | hypothetical protein |
| TS28Bac5974 CDS CDS                                         | 7.5   | 0.5  | 49.6 | NA | NA | hypothetical protein |
| TS28Bif1200 CDS CDS                                         | 3.8   | 0.3  | 49.6 | NA | NA | hypothetical protein |
| b2822 CDS exonuclease                                       | 7.5   | 0.5  | 49.6 | NA | NA | hypothetical protein |
| Bdor3167 CDS CDS                                            | 15.0  | 1.0  | 49.6 | NA | NA | hypothetical protein |
| Msm0843 CDS 2-deoxyribose-5-phosphate                       | 3.8   | 0.3  | 49.6 | NA | NA | hypothetical protein |
| CspM6212552 CDS CDS                                         | 15.0  | 1.0  | 49.6 | NA | NA | hypothetical protein |
| Msm0136 CDS putative                                        | 3.8   | 0.3  | 49.6 | NA | NA | hypothetical protein |
| Bova3213 CDS CDS                                            | 14.8  | 1.0  | 49.1 | NA | NA | hypothetical protein |
| TS28Ali2036 CDS CDS                                         | 415.0 | 28.0 | 49.0 | NA | NA | hypothetical protein |
| TS29Eub0956 CDS CDS                                         | 22.2  | 1.5  | 48.9 | NA | NA | hypothetical protein |
| BVU3197 CDS putative                                        | 66.5  | 4.5  | 48.9 | NA | NA | hypothetical protein |
| Msm1123 CDS coenzyme                                        | 84.5  | 5.8  | 48.6 | NA | NA | hypothetical protein |
| BVU0796 CDS 30S                                             | 14.7  | 1.0  | 48.5 | NA | NA | hypothetical protein |
| Msm1740907 CDS CDS                                          | 174.4 | 12.0 | 48.0 | NA | NA | hypothetical protein |
| b1588 CDS oxidoreductase                                    | 14.5  | 1.0  | 48.0 | NA | NA | hypothetical protein |
| PRABACT JOHN3211 CDS CDS                                    | 7.3   | 0.5  | 48.0 | NA | NA | hypothetical protein |
| b0927 CDS predicted                                         | 14.5  | 1.0  | 48.0 | NA | NA | hypothetical protein |
| Msm1124 CDS coenzyme                                        | 43.5  | 3.0  | 47.9 | NA | NA | hypothetical protein |
| BFych464196 CDS 50S                                         | 7.2   | 0.5  | 47.8 | NA | NA | hypothetical protein |
| BFntc4019 CDS 50S                                           | 7.2   | 0.5  | 47.8 | NA | NA | hypothetical protein |
| Bste2175 CDS CDS                                            | 86.0  | 6.0  | 47.4 | NA | NA | hypothetical protein |
| Cbar2411 CDS CDS                                            | 43.0  | 3.0  | 47.4 | NA | NA | hypothetical protein |
| TS29Rum17530 CDS CDS                                        | 43.0  | 3.0  | 47.4 | NA | NA | hypothetical protein |
| Msm1054 CDS IMP                                             | 7.1   | 0.5  | 47.0 | NA | NA | hypothetical protein |

|                                           |       |      |      |    |    |                      |
|-------------------------------------------|-------|------|------|----|----|----------------------|
| Msm0155 CDS predicted                     | 3.6   | 0.3  | 47.0 | NA | NA | hypothetical protein |
| TS28Fae22762 CDS CDS                      | 56.5  | 4.0  | 46.7 | NA | NA | hypothetical protein |
| Msm0309 CDS hypothetical                  | 4.7   | 0.3  | 46.6 | NA | NA | hypothetical protein |
| TS28Fae19798 CDS CDS                      | 14.0  | 1.0  | 46.3 | NA | NA | hypothetical protein |
| TS28Bif1935 CDS CDS                       | 14.0  | 1.0  | 46.3 | NA | NA | hypothetical protein |
| TS28Clo04540 CDS CDS                      | 28.0  | 2.0  | 46.3 | NA | NA | hypothetical protein |
| b0418 CDS phosphatidylinositolphosphatase | 14.0  | 1.0  | 46.3 | NA | NA | hypothetical protein |
| BVU1364 CDS glycoside                     | 7.0   | 0.5  | 46.3 | NA | NA | hypothetical protein |
| TS29Bac00469 CDS CDS                      | 7.0   | 0.5  | 46.3 | NA | NA | hypothetical protein |
| Dlon1079 CDS CDS                          | 7.0   | 0.5  | 46.3 | NA | NA | hypothetical protein |
| BactD10690 CDS CDS                        | 7.0   | 0.5  | 46.3 | NA | NA | hypothetical protein |
| Rtor1308 CDS CDS                          | 14.0  | 1.0  | 46.3 | NA | NA | hypothetical protein |
| Bste1123 CDS CDS                          | 14.0  | 1.0  | 46.3 | NA | NA | hypothetical protein |
| Dfor2250 CDS CDS                          | 14.0  | 1.0  | 46.3 | NA | NA | hypothetical protein |
| TS28Ali0782 CDS CDS                       | 28.0  | 2.0  | 46.3 | NA | NA | hypothetical protein |
| Bova2011 CDS CDS                          | 3.5   | 0.3  | 46.3 | NA | NA | hypothetical protein |
| TS28Fae20726 CDS CDS                      | 14.0  | 1.0  | 46.3 | NA | NA | hypothetical protein |
| FpraM2120184 CDS CDS                      | 7.0   | 0.5  | 46.3 | NA | NA | hypothetical protein |
| b4466 CDS predicted                       | 7.0   | 0.5  | 46.3 | NA | NA | hypothetical protein |
| TS28Fae07168 CDS CDS                      | 14.0  | 1.0  | 46.3 | NA | NA | hypothetical protein |
| TS29Rum19031 CDS CDS                      | 14.0  | 1.0  | 46.3 | NA | NA | hypothetical protein |
| Msm1740351 CDS CDS                        | 28.0  | 2.0  | 46.3 | NA | NA | hypothetical protein |
| BFnctc2138 CDS carboxymuconolactone       | 7.0   | 0.5  | 46.3 | NA | NA | hypothetical protein |
| Bdor2871 CDS CDS                          | 28.0  | 2.0  | 46.3 | NA | NA | hypothetical protein |
| BVU0742 CDS glycoside                     | 7.0   | 0.5  | 46.3 | NA | NA | hypothetical protein |
| HPAG10491 CDS GTP-binding                 | 14.0  | 1.0  | 46.3 | NA | NA | hypothetical protein |
| TS28Bac0562 CDS CDS                       | 7.0   | 0.5  | 46.3 | NA | NA | hypothetical protein |
| BVU3515 CDS phosphoglycerate              | 3.5   | 0.3  | 46.0 | NA | NA | hypothetical protein |
| Msm0813 CDS hypothetical                  | 9.3   | 0.7  | 45.9 | NA | NA | hypothetical protein |
| Msm0918 CDS phosphoglycerate              | 4.6   | 0.3  | 45.8 | NA | NA | hypothetical protein |
| Msm0943 CDS hypothetical                  | 19.3  | 1.4  | 45.1 | NA | NA | hypothetical protein |
| Msm1750833 CDS CDS                        | 19.3  | 1.4  | 45.1 | NA | NA | hypothetical protein |
| Cspl21862 CDS CDS                         | 36.3  | 2.7  | 45.0 | NA | NA | hypothetical protein |
| Ccom0008 CDS CDS                          | 1.1   | 0.1  | 44.7 | NA | NA | hypothetical protein |
| BactD12856 CDS CDS                        | 4.5   | 0.3  | 44.6 | NA | NA | hypothetical protein |
| TS29Bac09576 CDS CDS                      | 4.5   | 0.3  | 44.6 | NA | NA | hypothetical protein |
| b3339 CDS protein                         | 4.5   | 0.3  | 44.6 | NA | NA | hypothetical protein |
| TS28Rum04583 CDS CDS                      | 13.5  | 1.0  | 44.6 | NA | NA | hypothetical protein |
| TS28Ali1351 CDS CDS                       | 67.0  | 5.0  | 44.3 | NA | NA | hypothetical protein |
| Msm0292 CDS predicted                     | 26.8  | 2.0  | 44.2 | NA | NA | hypothetical protein |
| Msm1741640 CDS CDS                        | 26.8  | 2.0  | 44.2 | NA | NA | hypothetical protein |
| Msm0560 CDS pyruvate                      | 15.3  | 1.2  | 43.5 | NA | NA | hypothetical protein |
| BactD22821 CDS CDS                        | 13.0  | 1.0  | 43.0 | NA | NA | hypothetical protein |
| TS28Fae03566 CDS CDS                      | 13.0  | 1.0  | 43.0 | NA | NA | hypothetical protein |
| Msm0402 CDS deoxyxvctidine                | 3.3   | 0.3  | 43.0 | NA | NA | hypothetical protein |
| HPAG10727 CDS rod                         | 13.0  | 1.0  | 43.0 | NA | NA | hypothetical protein |
| Cbol4054 CDS CDS                          | 13.0  | 1.0  | 43.0 | NA | NA | hypothetical protein |
| TS29Rum17713 CDS CDS                      | 13.0  | 1.0  | 43.0 | NA | NA | hypothetical protein |
| HPAG11395 CDS type                        | 13.0  | 1.0  | 43.0 | NA | NA | hypothetical protein |
| Pmer1475 CDS CDS                          | 26.0  | 2.0  | 43.0 | NA | NA | hypothetical protein |
| TS28Bif0202 CDS CDS                       | 13.0  | 1.0  | 43.0 | NA | NA | hypothetical protein |
| Bdor3697 CDS CDS                          | 13.0  | 1.0  | 43.0 | NA | NA | hypothetical protein |
| Msm1714 CDS coenzyme                      | 3.3   | 0.3  | 43.0 | NA | NA | hypothetical protein |
| TS28Clo08513 CDS CDS                      | 13.0  | 1.0  | 43.0 | NA | NA | hypothetical protein |
| Csci2335 CDS CDS                          | 13.0  | 1.0  | 43.0 | NA | NA | hypothetical protein |
| TS28Rum07549 CDS CDS                      | 13.0  | 1.0  | 43.0 | NA | NA | hypothetical protein |
| Robe3564 CDS CDS                          | 52.0  | 4.0  | 43.0 | NA | NA | hypothetical protein |
| Msm0298 CDS S0S                           | 3.3   | 0.3  | 43.0 | NA | NA | hypothetical protein |
| Msm1741148 CDS CDS                        | 13.0  | 1.0  | 43.0 | NA | NA | hypothetical protein |
| Msm1413 CDS tunesten                      | 5.8   | 0.5  | 42.6 | NA | NA | hypothetical protein |
| Msm1388 CDS thiamine                      | 8.6   | 0.7  | 42.6 | NA | NA | hypothetical protein |
| BVU0198 CDS hypothetical                  | 25.7  | 2.0  | 42.4 | NA | NA | hypothetical protein |
| Msm1405 CDS formate                       | 30.9  | 2.4  | 42.2 | NA | NA | hypothetical protein |
| Msm0999 CDS methyl                        | 36.2  | 2.8  | 42.2 | NA | NA | hypothetical protein |
| Msm1620 CDS cobalt                        | 4.2   | 0.3  | 42.0 | NA | NA | hypothetical protein |
| b0924 CDS fused                           | 6.3   | 0.5  | 41.9 | NA | NA | hypothetical protein |
| TS28Fae17686 CDS CDS                      | 253.0 | 20.0 | 41.8 | NA | NA | hypothetical protein |
| TS28Met0137 CDS CDS                       | 142.3 | 11.3 | 41.5 | NA | NA | hypothetical protein |
| BVU3435 CDS hypothetical                  | 238.0 | 19.0 | 41.4 | NA | NA | hypothetical protein |
| TS28Fae10756 CDS CDS                      | 12.5  | 1.0  | 41.3 | NA | NA | hypothetical protein |
| TS28Fae07888 CDS CDS                      | 12.5  | 1.0  | 41.3 | NA | NA | hypothetical protein |
| Dfor0627 CDS CDS                          | 50.0  | 4.0  | 41.3 | NA | NA | hypothetical protein |
| TS29Fae05258 CDS CDS                      | 12.5  | 1.0  | 41.3 | NA | NA | hypothetical protein |
| TS28Ali0660 CDS CDS                       | 854.0 | 69.0 | 40.9 | NA | NA | hypothetical protein |
| BVU1158 CDS putative                      | 41.2  | 3.3  | 40.8 | NA | NA | hypothetical protein |
| b0772 CDS predicted                       | 6.2   | 0.5  | 40.8 | NA | NA | hypothetical protein |
| BVU1429 CDS putative                      | 37.0  | 3.0  | 40.8 | NA | NA | hypothetical protein |
| Pmer2779 CDS CDS                          | 256.7 | 21.0 | 40.4 | NA | NA | hypothetical protein |
| TS29Fae02498 CDS CDS                      | 36.5  | 3.0  | 40.2 | NA | NA | hypothetical protein |
| TS28Bac3283 CDS CDS                       | 16.2  | 1.3  | 40.1 | NA | NA | hypothetical protein |
| TS28Bac5722 CDS CDS                       | 48.5  | 4.0  | 40.1 | NA | NA | hypothetical protein |
| BVU3347 CDS RNA                           | 66.7  | 5.5  | 40.1 | NA | NA | hypothetical protein |
| Msm1550 CDS uroporphyrin-III              | 4.0   | 0.3  | 39.7 | NA | NA | hypothetical protein |
| TS28Euh8348 CDS CDS                       | 36.0  | 3.0  | 39.7 | NA | NA | hypothetical protein |
| BVU0996 CDS DNA-binding                   | 72.0  | 6.0  | 39.7 | NA | NA | hypothetical protein |
| b2549 CDS conserved                       | 12.0  | 1.0  | 39.7 | NA | NA | hypothetical protein |
| TS29Bac03734 CDS CDS                      | 6.0   | 0.5  | 39.7 | NA | NA | hypothetical protein |
| Pmer0449 CDS CDS                          | 12.0  | 1.0  | 39.7 | NA | NA | hypothetical protein |
| TS28Par2430 CDS CDS                       | 6.0   | 0.5  | 39.7 | NA | NA | hypothetical protein |
| TS28Fae10035 CDS CDS                      | 12.0  | 1.0  | 39.7 | NA | NA | hypothetical protein |
| Pmer3017 CDS CDS                          | 12.0  | 1.0  | 39.7 | NA | NA | hypothetical protein |
| TS29Met0434 CDS CDS                       | 12.0  | 1.0  | 39.7 | NA | NA | hypothetical protein |

|                                               |       |      |      |    |    |                      |
|-----------------------------------------------|-------|------|------|----|----|----------------------|
| Cbar2386/CDS/CDS                              | 12.0  | 1.0  | 39.7 | NA | NA | hypothetical protein |
| TS28Rum02425/CDS/CDS                          | 6.0   | 0.5  | 39.7 | NA | NA | hypothetical protein |
| TS28Bac2367/CDS/CDS                           | 12.0  | 1.0  | 39.7 | NA | NA | hypothetical protein |
| Bcap0334/CDS/CDS                              | 12.0  | 1.0  | 39.7 | NA | NA | hypothetical protein |
| Robe2215/CDS/CDS                              | 12.0  | 1.0  | 39.7 | NA | NA | hypothetical protein |
| TS29Fae02057/CDS/CDS                          | 6.0   | 0.5  | 39.7 | NA | NA | hypothetical protein |
| HPAG10088/CDS/hypothetical                    | 12.0  | 1.0  | 39.7 | NA | NA | hypothetical protein |
| b3355/CDS/predicted                           | 6.0   | 0.5  | 39.7 | NA | NA | hypothetical protein |
| TS28RumUnc0868/CDS/CDS                        | 12.0  | 1.0  | 39.7 | NA | NA | hypothetical protein |
| TS28RumUnc1083/CDS/CDS                        | 12.0  | 1.0  | 39.7 | NA | NA | hypothetical protein |
| HPAG10811/CDS/thioredoxin                     | 12.0  | 1.0  | 39.7 | NA | NA | hypothetical protein |
| HPAG10774/CDS/outer                           | 12.0  | 1.0  | 39.7 | NA | NA | hypothetical protein |
| b2805/CDS/DNA-binding                         | 12.0  | 1.0  | 39.7 | NA | NA | hypothetical protein |
| Dlon0993/CDS/CDS                              | 6.0   | 0.5  | 39.7 | NA | NA | hypothetical protein |
| TS28Fae04555/CDS/CDS                          | 264.0 | 22.0 | 39.7 | NA | NA | hypothetical protein |
| TS29Fae02346/CDS/CDS                          | 59.8  | 5.0  | 39.5 | NA | NA | hypothetical protein |
| Msm1750899/CDS/CDS                            | 20.8  | 1.8  | 39.2 | NA | NA | hypothetical protein |
| Msm1740784/CDS/CDS                            | 20.8  | 1.8  | 39.2 | NA | NA | hypothetical protein |
| b3158/CDS/predicted                           | 5.9   | 0.5  | 39.1 | NA | NA | hypothetical protein |
| Bdor0223/CDS/CDS                              | 35.3  | 3.0  | 38.9 | NA | NA | hypothetical protein |
| Bxyl1100/CDS/CDS                              | 9.8   | 0.8  | 38.8 | NA | NA | hypothetical protein |
| Pmer3005/CDS/CDS                              | 35.0  | 3.0  | 38.6 | NA | NA | hypothetical protein |
| TS28Bac1144/CDS/CDS                           | 23.3  | 2.0  | 38.6 | NA | NA | hypothetical protein |
| TS29Fae01327/CDS/CDS                          | 127.0 | 11.0 | 38.2 | NA | NA | hypothetical protein |
| TS29Bac02077/CDS/CDS                          | 11.5  | 1.0  | 38.0 | NA | NA | hypothetical protein |
| BVU2312/CDS/hypothetical                      | 11.5  | 1.0  | 38.0 | NA | NA | hypothetical protein |
| TS28Fae17103/CDS/CDS                          | 11.5  | 1.0  | 38.0 | NA | NA | hypothetical protein |
| Bdor3903/CDS/CDS                              | 11.5  | 1.0  | 38.0 | NA | NA | hypothetical protein |
| Msm1359/CDS/adenine                           | 5.8   | 0.5  | 38.0 | NA | NA | hypothetical protein |
| TS28Clo06388/CDS/CDS                          | 46.0  | 4.0  | 38.0 | NA | NA | hypothetical protein |
| TS29Fae09430/CDS/CDS                          | 11.5  | 1.0  | 38.0 | NA | NA | hypothetical protein |
| TS28Rum04676/CDS/CDS                          | 23.0  | 2.0  | 38.0 | NA | NA | hypothetical protein |
| TS28Ali1509/CDS/CDS                           | 489.0 | 43.0 | 37.6 | NA | NA | hypothetical protein |
| Bste2342/CDS/CDS                              | 17.0  | 1.5  | 37.5 | NA | NA | hypothetical protein |
| Bxyl1461/CDS/CDS                              | 5.7   | 0.5  | 37.5 | NA | NA | hypothetical protein |
| TS29Bac03596/CDS/CDS                          | 5.7   | 0.5  | 37.5 | NA | NA | hypothetical protein |
| Msm0171/CDS/hypothetical                      | 2.8   | 0.3  | 37.5 | NA | NA | hypothetical protein |
| TS28Bac7339/CDS/CDS                           | 5.7   | 0.5  | 37.5 | NA | NA | hypothetical protein |
| TS28Rum09603/CDS/CDS                          | 73.5  | 6.5  | 37.4 | NA | NA | hypothetical protein |
| EFER3774/CDS/protein                          | 3.7   | 0.3  | 36.9 | NA | NA | hypothetical protein |
| Msm0501/CDS/phycocyanin                       | 2.8   | 0.3  | 36.6 | NA | NA | hypothetical protein |
| TS28Ali0285/CDS/CDS                           | 94.0  | 8.5  | 36.6 | NA | NA | hypothetical protein |
| TS28Ali1506/CDS/CDS                           | 232.0 | 21.0 | 36.5 | NA | NA | hypothetical protein |
| Msm0518/CDS/methylcobalamin.coenzyme          | 3.7   | 0.3  | 36.4 | NA | NA | hypothetical protein |
| Msm0025/CDS/lacvL-CoA                         | 3.7   | 0.3  | 36.4 | NA | NA | hypothetical protein |
| TS29Bac07656/CDS/CDS                          | 3.7   | 0.3  | 36.4 | NA | NA | hypothetical protein |
| Rtor1204/CDS/CDS                              | 7.3   | 0.7  | 36.4 | NA | NA | hypothetical protein |
| BVU1156/CDS/hypothetical                      | 20.2  | 1.8  | 36.4 | NA | NA | hypothetical protein |
| TS29Bac09800/CDS/CDS                          | 5.5   | 0.5  | 36.4 | NA | NA | hypothetical protein |
| TS28Fae06012/CDS/CDS                          | 11.0  | 1.0  | 36.4 | NA | NA | hypothetical protein |
| Dfor0045/CDS/CDS                              | 66.0  | 6.0  | 36.4 | NA | NA | hypothetical protein |
| Bxyl2905/CDS/CDS                              | 5.5   | 0.5  | 36.4 | NA | NA | hypothetical protein |
| TS29Bac01342/CDS/CDS                          | 11.0  | 1.0  | 36.4 | NA | NA | hypothetical protein |
| TS28Rum09199/CDS/CDS                          | 11.0  | 1.0  | 36.4 | NA | NA | hypothetical protein |
| Msm0262/CDS/desulfoferrodoxin                 | 5.5   | 0.5  | 36.4 | NA | NA | hypothetical protein |
| TS29Met1016/CDS/CDS                           | 5.5   | 0.5  | 36.4 | NA | NA | hypothetical protein |
| TS28Ali1870/CDS/CDS                           | 352.0 | 32.0 | 36.4 | NA | NA | hypothetical protein |
| HPAG11027/CDS/hypothetical                    | 11.0  | 1.0  | 36.4 | NA | NA | hypothetical protein |
| HPAG10265/CDS/type                            | 11.0  | 1.0  | 36.4 | NA | NA | hypothetical protein |
| TS28Rum09602/CDS/CDS                          | 11.0  | 1.0  | 36.4 | NA | NA | hypothetical protein |
| TS29Rum13936/CDS/CDS                          | 33.0  | 3.0  | 36.4 | NA | NA | hypothetical protein |
| TS29Bif3099/CDS/CDS                           | 11.0  | 1.0  | 36.4 | NA | NA | hypothetical protein |
| TS29Rum17608/CDS/CDS                          | 11.0  | 1.0  | 36.4 | NA | NA | hypothetical protein |
| TS29Fae08298/CDS/CDS                          | 5.5   | 0.5  | 36.4 | NA | NA | hypothetical protein |
| Pmer3260/CDS/CDS                              | 11.0  | 1.0  | 36.4 | NA | NA | hypothetical protein |
| Bcap1628/CDS/CDS                              | 11.0  | 1.0  | 36.4 | NA | NA | hypothetical protein |
| b2810/CDS/evsteine                            | 5.5   | 0.5  | 36.4 | NA | NA | hypothetical protein |
| Msm1549/CDS/phosphoribosylformylglycinamidine | 2.8   | 0.3  | 36.4 | NA | NA | hypothetical protein |
| Msm0229/CDS/hypothetical                      | 5.5   | 0.5  | 36.4 | NA | NA | hypothetical protein |
| HPAG11422/CDS/phosphate                       | 11.0  | 1.0  | 36.4 | NA | NA | hypothetical protein |
| Pmer3259/CDS/CDS                              | 33.0  | 3.0  | 36.4 | NA | NA | hypothetical protein |
| b4586/CDS/hypothetical                        | 11.0  | 1.0  | 36.4 | NA | NA | hypothetical protein |
| Msm1468/CDS/adenylosuccinate                  | 5.5   | 0.5  | 36.4 | NA | NA | hypothetical protein |
| Bcoproc2742/CDS/CDS                           | 3.7   | 0.3  | 36.4 | NA | NA | hypothetical protein |
| Msm1446/CDS/hydroxylamine                     | 31.0  | 2.8  | 36.2 | NA | NA | hypothetical protein |
| BactD12171/CDS/CDS                            | 10.8  | 1.0  | 35.8 | NA | NA | hypothetical protein |
| Msm1086/CDS/hypothetical                      | 10.8  | 1.0  | 35.7 | NA | NA | hypothetical protein |
| TS29Rum17529/CDS/CDS                          | 16.0  | 1.5  | 35.3 | NA | NA | hypothetical protein |
| Bdor0861/CDS/CDS                              | 32.0  | 3.0  | 35.3 | NA | NA | hypothetical protein |
| TS28Ali1871/CDS/CDS                           | 85.0  | 8.0  | 35.1 | NA | NA | hypothetical protein |
| TS28Clo02073/CDS/CDS                          | 106.0 | 10.0 | 35.1 | NA | NA | hypothetical protein |
| Bxyl4368/CDS/CDS                              | 3.5   | 0.3  | 34.7 | NA | NA | hypothetical protein |
| TS28Fae13859/CDS/CDS                          | 10.5  | 1.0  | 34.7 | NA | NA | hypothetical protein |
| TS29Fae02457/CDS/CDS                          | 10.5  | 1.0  | 34.7 | NA | NA | hypothetical protein |
| Msm0934/CDS/predicted                         | 5.3   | 0.5  | 34.7 | NA | NA | hypothetical protein |
| Bxyl1523/CDS/CDS                              | 5.3   | 0.5  | 34.7 | NA | NA | hypothetical protein |
| Pmer1156/CDS/CDS                              | 26.0  | 2.5  | 34.4 | NA | NA | hypothetical protein |
| Bste2607/CDS/CDS                              | 10.4  | 1.0  | 34.4 | NA | NA | hypothetical protein |
| Msm0517/CDS/methyltransferase                 | 24.2  | 2.3  | 34.3 | NA | NA | hypothetical protein |
| TS28Clo09195/CDS/CDS                          | 31.0  | 3.0  | 34.2 | NA | NA | hypothetical protein |
| BWH25667/CDS/CDS                              | 5.2   | 0.5  | 34.2 | NA | NA | hypothetical protein |

|                                   |       |      |      |    |    |                      |
|-----------------------------------|-------|------|------|----|----|----------------------|
| Bthe3735771 CDS CDS               | 5.2   | 0.5  | 34.2 | NA | NA | hypothetical protein |
| TS28Rum09321 CDS CDS              | 6.8   | 0.7  | 33.9 | NA | NA | hypothetical protein |
| BactD13477 CDS CDS                | 15.3  | 1.5  | 33.8 | NA | NA | hypothetical protein |
| Msmi751415 CDS CDS                | 2.6   | 0.3  | 33.7 | NA | NA | hypothetical protein |
| Rbro0754 CDS CDS                  | 117.0 | 11.5 | 33.6 | NA | NA | hypothetical protein |
| Rbro0865 CDS CDS                  | 10.2  | 1.0  | 33.6 | NA | NA | hypothetical protein |
| Msm0056 CDS fructose-bisphosphate | 5.1   | 0.5  | 33.6 | NA | NA | hypothetical protein |
| Pmer3255 CDS CDS                  | 61.0  | 6.0  | 33.6 | NA | NA | hypothetical protein |
| BVU0052 CDS putative              | 131.5 | 13.0 | 33.5 | NA | NA | hypothetical protein |
| b3988 CDS IRNA                    | 18.5  | 1.8  | 33.4 | NA | NA | hypothetical protein |
| Bste1494 CDS CDS                  | 121.0 | 12.0 | 33.3 | NA | NA | hypothetical protein |
| TS28Fae15213 CDS CDS              | 20.1  | 2.0  | 33.2 | NA | NA | hypothetical protein |
| stu1963 CDS anaerobic             | 6.7   | 0.7  | 33.1 | NA | NA | hypothetical protein |
| str1963 CDS anaerobic             | 6.7   | 0.7  | 33.1 | NA | NA | hypothetical protein |
| Rbro0220 CDS CDS                  | 3.3   | 0.3  | 33.1 | NA | NA | hypothetical protein |
| TS29Eub1098 CDS CDS               | 3.3   | 0.3  | 33.1 | NA | NA | hypothetical protein |
| TS29Eub2139 CDS CDS               | 3.3   | 0.3  | 33.1 | NA | NA | hypothetical protein |
| TS28Fae20389 CDS CDS              | 15.0  | 1.5  | 33.1 | NA | NA | hypothetical protein |
| TS28Bac5962 CDS CDS               | 3.3   | 0.3  | 33.1 | NA | NA | hypothetical protein |
| TS28Par0865 CDS CDS               | 10.0  | 1.0  | 33.1 | NA | NA | hypothetical protein |
| HPAG10139 CDS L-lactate           | 10.0  | 1.0  | 33.1 | NA | NA | hypothetical protein |
| TS29Rum11259 CDS CDS              | 10.0  | 1.0  | 33.1 | NA | NA | hypothetical protein |
| TS29Dor1234 CDS CDS               | 10.0  | 1.0  | 33.1 | NA | NA | hypothetical protein |
| BVU1470 CDS hypothetical          | 5.0   | 0.5  | 33.1 | NA | NA | hypothetical protein |
| Msm0355 CDS predicted             | 2.5   | 0.3  | 33.1 | NA | NA | hypothetical protein |
| BVU1770 CDS hypothetical          | 5.0   | 0.5  | 33.1 | NA | NA | hypothetical protein |
| TS28Fae20867 CDS CDS              | 10.0  | 1.0  | 33.1 | NA | NA | hypothetical protein |
| TS29Bac00100 CDS CDS              | 10.0  | 1.0  | 33.1 | NA | NA | hypothetical protein |
| BVU2291 CDS hypothetical          | 5.0   | 0.5  | 33.1 | NA | NA | hypothetical protein |
| TS28Fae15810 CDS CDS              | 10.0  | 1.0  | 33.1 | NA | NA | hypothetical protein |
| Bint0432 CDS CDS                  | 2.5   | 0.3  | 33.1 | NA | NA | hypothetical protein |
| M23Apeg793 CDS Transcription      | 10.0  | 1.0  | 33.1 | NA | NA | hypothetical protein |
| Msm0358 CDS hypothetical          | 5.0   | 0.5  | 33.1 | NA | NA | hypothetical protein |
| TS28Ali0215 CDS CDS               | 20.0  | 2.0  | 33.1 | NA | NA | hypothetical protein |
| TS28Ali2078 CDS CDS               | 20.0  | 2.0  | 33.1 | NA | NA | hypothetical protein |
| Pmer3266 CDS CDS                  | 10.0  | 1.0  | 33.1 | NA | NA | hypothetical protein |
| TS28Ali1772 CDS CDS               | 5.0   | 0.5  | 33.1 | NA | NA | hypothetical protein |
| Cbar1717 CDS CDS                  | 10.0  | 1.0  | 33.1 | NA | NA | hypothetical protein |
| TS29Fae09396 CDS CDS              | 5.0   | 0.5  | 33.1 | NA | NA | hypothetical protein |
| Bxyl2632 CDS CDS                  | 10.0  | 1.0  | 33.1 | NA | NA | hypothetical protein |
| Bste2720 CDS CDS                  | 10.0  | 1.0  | 33.1 | NA | NA | hypothetical protein |
| TS29Fae10254 CDS CDS              | 5.0   | 0.5  | 33.1 | NA | NA | hypothetical protein |
| Buni1024 CDS CDS                  | 10.0  | 1.0  | 33.1 | NA | NA | hypothetical protein |
| TS28Bac5553 CDS CDS               | 20.0  | 2.0  | 33.1 | NA | NA | hypothetical protein |
| Bste0988 CDS CDS                  | 10.0  | 1.0  | 33.1 | NA | NA | hypothetical protein |
| Bste1147 CDS CDS                  | 10.0  | 1.0  | 33.1 | NA | NA | hypothetical protein |
| str0993 CDS hypothetical          | 10.0  | 1.0  | 33.1 | NA | NA | hypothetical protein |
| TS28Clo09662 CDS CDS              | 10.0  | 1.0  | 33.1 | NA | NA | hypothetical protein |
| Even1132 CDS CDS                  | 10.0  | 1.0  | 33.1 | NA | NA | hypothetical protein |
| Cnex1122 CDS CDS                  | 10.0  | 1.0  | 33.1 | NA | NA | hypothetical protein |
| TS28Par2128 CDS CDS               | 10.0  | 1.0  | 33.1 | NA | NA | hypothetical protein |
| BactD22540 CDS CDS                | 5.0   | 0.5  | 33.1 | NA | NA | hypothetical protein |
| Acol1276 CDS CDS                  | 10.0  | 1.0  | 33.1 | NA | NA | hypothetical protein |
| HPAG10405 CDS hypothetical        | 10.0  | 1.0  | 33.1 | NA | NA | hypothetical protein |
| TS29Rum10573 CDS CDS              | 5.0   | 0.5  | 33.1 | NA | NA | hypothetical protein |
| EUBREC0301 CDS hypothetical       | 5.0   | 0.5  | 33.1 | NA | NA | hypothetical protein |
| Bdor2757 CDS CDS                  | 19.8  | 2.0  | 32.8 | NA | NA | hypothetical protein |
| TS28Bac5716 CDS CDS               | 19.8  | 2.0  | 32.8 | NA | NA | hypothetical protein |
| BVU2597 CDS glucosyltransferase   | 16.5  | 1.7  | 32.7 | NA | NA | hypothetical protein |
| TS28Clo10782 CDS CDS              | 108.5 | 11.0 | 32.6 | NA | NA | hypothetical protein |
| Bste2866 CDS CDS                  | 49.0  | 5.0  | 32.4 | NA | NA | hypothetical protein |
| BVU2243 CDS hypothetical          | 8.2   | 0.8  | 32.4 | NA | NA | hypothetical protein |
| Msm0002 CDS integrase-recombinase | 3.3   | 0.3  | 32.2 | NA | NA | hypothetical protein |
| TS28Fae04554 CDS CDS              | 68.0  | 7.0  | 32.1 | NA | NA | hypothetical protein |
| Msm1332 CDS replication           | 4.9   | 0.5  | 32.1 | NA | NA | hypothetical protein |
| Bdor3171 CDS CDS                  | 33.8  | 3.5  | 32.0 | NA | NA | hypothetical protein |
| TS28Ali2060 CDS CDS               | 58.0  | 6.0  | 32.0 | NA | NA | hypothetical protein |
| TS29Bac08946 CDS CDS              | 4.8   | 0.5  | 32.0 | NA | NA | hypothetical protein |
| b2616 CDS recombination           | 4.8   | 0.5  | 32.0 | NA | NA | hypothetical protein |
| BVU2271 CDS outer                 | 226.8 | 23.5 | 31.9 | NA | NA | hypothetical protein |
| Bste1493 CDS CDS                  | 77.0  | 8.0  | 31.8 | NA | NA | hypothetical protein |
| TS28Ali1019 CDS CDS               | 67.0  | 7.0  | 31.7 | NA | NA | hypothetical protein |
| TS28Fae12733 CDS CDS              | 181.0 | 19.0 | 31.5 | NA | NA | hypothetical protein |
| BVU2754 CDS ferritin              | 100.0 | 10.5 | 31.5 | NA | NA | hypothetical protein |
| str0255 CDS glutamate             | 3.2   | 0.3  | 31.4 | NA | NA | hypothetical protein |
| STER0302 CDS glutamate            | 3.2   | 0.3  | 31.4 | NA | NA | hypothetical protein |
| Bxyl1414 CDS CDS                  | 3.2   | 0.3  | 31.4 | NA | NA | hypothetical protein |
| TS28Fae01288 CDS CDS              | 14.3  | 1.5  | 31.4 | NA | NA | hypothetical protein |
| Pmer2476 CDS CDS                  | 19.0  | 2.0  | 31.4 | NA | NA | hypothetical protein |
| Bova1217 CDS CDS                  | 9.5   | 1.0  | 31.4 | NA | NA | hypothetical protein |
| Bxyl0576 CDS CDS                  | 4.8   | 0.5  | 31.4 | NA | NA | hypothetical protein |
| TS28Fae04361 CDS CDS              | 38.0  | 4.0  | 31.4 | NA | NA | hypothetical protein |
| TS28Clo03262 CDS CDS              | 19.0  | 2.0  | 31.4 | NA | NA | hypothetical protein |
| Buni0158 CDS CDS                  | 9.5   | 1.0  | 31.4 | NA | NA | hypothetical protein |
| TS28Par0848 CDS CDS               | 9.5   | 1.0  | 31.4 | NA | NA | hypothetical protein |
| Bdor1158 CDS CDS                  | 19.0  | 2.0  | 31.4 | NA | NA | hypothetical protein |
| TS29Fae06102 CDS CDS              | 9.5   | 1.0  | 31.4 | NA | NA | hypothetical protein |
| TS28Ali0287 CDS CDS               | 33.0  | 3.5  | 31.2 | NA | NA | hypothetical protein |
| Msm0923 CDS multimeric            | 4.7   | 0.5  | 31.1 | NA | NA | hypothetical protein |
| Bdor1760 CDS CDS                  | 40.7  | 4.3  | 31.0 | NA | NA | hypothetical protein |
| TS29Bac00037 CDS CDS              | 93.5  | 10.0 | 30.9 | NA | NA | hypothetical protein |
| TS28Clo10781 CDS CDS              | 93.5  | 10.0 | 30.9 | NA | NA | hypothetical protein |

|                                     |       |      |      |    |    |                      |
|-------------------------------------|-------|------|------|----|----|----------------------|
| TS28Fae16376/CDS/CDS                | 28.0  | 3.0  | 30.9 | NA | NA | hypothetical protein |
| b3800/CDS/predicted                 | 9.3   | 1.0  | 30.9 | NA | NA | hypothetical protein |
| Bdor2589/CDS/CDS                    | 9.3   | 1.0  | 30.9 | NA | NA | hypothetical protein |
| TS28Clo02049/CDS/CDS                | 121.0 | 13.0 | 30.8 | NA | NA | hypothetical protein |
| Pmer1555/CDS/CDS                    | 46.5  | 5.0  | 30.8 | NA | NA | hypothetical protein |
| Bste0376/CDS/CDS                    | 55.3  | 6.0  | 30.5 | NA | NA | hypothetical protein |
| Bste2248/CDS/CDS                    | 55.3  | 6.0  | 30.5 | NA | NA | hypothetical protein |
| TS28Bac3636/CDS/CDS                 | 76.7  | 8.3  | 30.4 | NA | NA | hypothetical protein |
| TS28Met1709/CDS/CDS                 | 4.6   | 0.5  | 30.3 | NA | NA | hypothetical protein |
| BVU3775/CDS/hypothetical            | 9.2   | 1.0  | 30.3 | NA | NA | hypothetical protein |
| Msm0786/CDS/transglutaminase-like   | 13.8  | 1.5  | 30.3 | NA | NA | hypothetical protein |
| Msm0626/CDS/cell                    | 24.3  | 2.7  | 30.2 | NA | NA | hypothetical protein |
| BVU3160/CDS/haloacid                | 18.2  | 2.0  | 30.0 | NA | NA | hypothetical protein |
| TS28Met0541/CDS/CDS                 | 221.9 | 24.5 | 29.9 | NA | NA | hypothetical protein |
| BVU2897/CDS/glucosyltransferase     | 36.2  | 4.0  | 29.9 | NA | NA | hypothetical protein |
| BVU2579/CDS/hypothetical            | 126.3 | 14.0 | 29.8 | NA | NA | hypothetical protein |
| TS29Bac11652/CDS/CDS                | 3.0   | 0.3  | 29.8 | NA | NA | hypothetical protein |
| Msm1151/CDS/adenylosuccinate        | 3.0   | 0.3  | 29.8 | NA | NA | hypothetical protein |
| Bxy13265/CDS/CDS                    | 3.0   | 0.3  | 29.8 | NA | NA | hypothetical protein |
| EnraM2122295/CDS/CDS                | 3.0   | 0.3  | 29.8 | NA | NA | hypothetical protein |
| Msm1636/CDS/ProFAR                  | 3.0   | 0.3  | 29.8 | NA | NA | hypothetical protein |
| Msm1750380/CDS/CDS                  | 3.0   | 0.3  | 29.8 | NA | NA | hypothetical protein |
| HPAG11146/CDS/translation           | 9.0   | 1.0  | 29.8 | NA | NA | hypothetical protein |
| TS28RumUnc1537/CDS/CDS              | 9.0   | 1.0  | 29.8 | NA | NA | hypothetical protein |
| Msm1492/CDS/hydrogenase             | 2.3   | 0.3  | 29.8 | NA | NA | hypothetical protein |
| b1189/CDS/D-amino                   | 9.0   | 1.0  | 29.8 | NA | NA | hypothetical protein |
| TS29Fae00114/CDS/CDS                | 18.0  | 2.0  | 29.8 | NA | NA | hypothetical protein |
| Msm0121/CDS/DNA                     | 2.3   | 0.3  | 29.8 | NA | NA | hypothetical protein |
| TS28Par0285/CDS/CDS                 | 18.0  | 2.0  | 29.8 | NA | NA | hypothetical protein |
| TS29Rum17013/CDS/CDS                | 4.5   | 0.5  | 29.8 | NA | NA | hypothetical protein |
| b2546/CDS/predicted                 | 4.5   | 0.5  | 29.8 | NA | NA | hypothetical protein |
| Cbar0312/CDS/CDS                    | 18.0  | 2.0  | 29.8 | NA | NA | hypothetical protein |
| TS28Bac7187/CDS/CDS                 | 4.5   | 0.5  | 29.8 | NA | NA | hypothetical protein |
| Bste1085/CDS/CDS                    | 18.0  | 2.0  | 29.8 | NA | NA | hypothetical protein |
| TS29Fae06926/CDS/CDS                | 4.5   | 0.5  | 29.8 | NA | NA | hypothetical protein |
| L169301/CDS/hypothetical            | 9.0   | 1.0  | 29.8 | NA | NA | hypothetical protein |
| BLD1312/CDS/Heat                    | 2.3   | 0.3  | 29.8 | NA | NA | hypothetical protein |
| TS29Ali429/CDS/CDS                  | 4.5   | 0.5  | 29.8 | NA | NA | hypothetical protein |
| TS28Fae06148/CDS/CDS                | 27.0  | 3.0  | 29.8 | NA | NA | hypothetical protein |
| Dfor1495/CDS/CDS                    | 9.0   | 1.0  | 29.8 | NA | NA | hypothetical protein |
| TS28Fae16883/CDS/CDS                | 4.5   | 0.5  | 29.8 | NA | NA | hypothetical protein |
| TS28Bac7392/CDS/CDS                 | 9.0   | 1.0  | 29.8 | NA | NA | hypothetical protein |
| Bova3279/CDS/CDS                    | 4.5   | 0.5  | 29.8 | NA | NA | hypothetical protein |
| TS28Par2038/CDS/CDS                 | 4.5   | 0.5  | 29.8 | NA | NA | hypothetical protein |
| TS29Fae05222/CDS/CDS                | 4.5   | 0.5  | 29.8 | NA | NA | hypothetical protein |
| Bthe3730719/CDS/CDS                 | 4.5   | 0.5  | 29.8 | NA | NA | hypothetical protein |
| Bdor3226/CDS/CDS                    | 72.0  | 8.0  | 29.8 | NA | NA | hypothetical protein |
| Aput127/CDS/CDS                     | 4.5   | 0.5  | 29.8 | NA | NA | hypothetical protein |
| Msm0604/CDS/predicted               | 2.3   | 0.3  | 29.8 | NA | NA | hypothetical protein |
| Msm1279/CDS/predicted               | 2.3   | 0.3  | 29.8 | NA | NA | hypothetical protein |
| TS29Rum04907/CDS/CDS                | 9.0   | 1.0  | 29.8 | NA | NA | hypothetical protein |
| Bste0034/CDS/CDS                    | 9.0   | 1.0  | 29.8 | NA | NA | hypothetical protein |
| Aput1553/CDS/CDS                    | 9.0   | 1.0  | 29.8 | NA | NA | hypothetical protein |
| TS28Col1196/CDS/CDS                 | 9.0   | 1.0  | 29.8 | NA | NA | hypothetical protein |
| Cbar2442/CDS/CDS                    | 9.0   | 1.0  | 29.8 | NA | NA | hypothetical protein |
| Rena2802/CDS/CDS                    | 9.0   | 1.0  | 29.8 | NA | NA | hypothetical protein |
| Buni0105/CDS/CDS                    | 9.0   | 1.0  | 29.8 | NA | NA | hypothetical protein |
| TS28Ali0822/CDS/CDS                 | 4.5   | 0.5  | 29.8 | NA | NA | hypothetical protein |
| Cbar0109/CDS/CDS                    | 9.0   | 1.0  | 29.8 | NA | NA | hypothetical protein |
| RintL1272/CDS/CDS                   | 2.3   | 0.3  | 29.8 | NA | NA | hypothetical protein |
| EU BRE C2855/CDS/hypothetical       | 81.0  | 9.0  | 29.8 | NA | NA | hypothetical protein |
| TS28Eub6029/CDS/CDS                 | 9.0   | 1.0  | 29.8 | NA | NA | hypothetical protein |
| Bege2395/CDS/CDS                    | 9.0   | 1.0  | 29.8 | NA | NA | hypothetical protein |
| Robe2671/CDS/CDS                    | 2.3   | 0.3  | 29.8 | NA | NA | hypothetical protein |
| BactD21542/CDS/CDS                  | 4.5   | 0.5  | 29.8 | NA | NA | hypothetical protein |
| b0801/CDS/predicted                 | 9.0   | 1.0  | 29.8 | NA | NA | hypothetical protein |
| Dfor3105/CDS/CDS                    | 2.3   | 0.3  | 29.8 | NA | NA | hypothetical protein |
| Bege2484/CDS/CDS                    | 9.0   | 1.0  | 29.8 | NA | NA | hypothetical protein |
| b2866/CDS/xanthine                  | 4.5   | 0.5  | 29.8 | NA | NA | hypothetical protein |
| BVU3077/CDS/putative                | 9.0   | 1.0  | 29.8 | NA | NA | hypothetical protein |
| Rena3025/CDS/CDS                    | 9.0   | 1.0  | 29.8 | NA | NA | hypothetical protein |
| BVU3001/CDS/ATP                     | 9.0   | 1.0  | 29.8 | NA | NA | hypothetical protein |
| TS28Fae01911/CDS/CDS                | 9.0   | 1.0  | 29.8 | NA | NA | hypothetical protein |
| HPAG10864/CDS/hypothetical          | 9.0   | 1.0  | 29.8 | NA | NA | hypothetical protein |
| Msm0090/CDS/hypothetical            | 6.0   | 0.7  | 29.8 | NA | NA | hypothetical protein |
| TS28Fae14005/CDS/CDS                | 53.8  | 6.0  | 29.7 | NA | NA | hypothetical protein |
| BactD22268/CDS/CDS                  | 4.5   | 0.5  | 29.5 | NA | NA | hypothetical protein |
| BVU0345/CDS/chaperonin              | 102.3 | 11.5 | 29.4 | NA | NA | hypothetical protein |
| Bdor0313/CDS/CDS                    | 26.7  | 3.0  | 29.4 | NA | NA | hypothetical protein |
| TS29Bac01388/CDS/CDS                | 8.8   | 1.0  | 29.2 | NA | NA | hypothetical protein |
| TS28Clo10288/CDS/CDS                | 97.0  | 11.0 | 29.2 | NA | NA | hypothetical protein |
| Msm1409/CDS/tungsten                | 9.1   | 1.0  | 29.0 | NA | NA | hypothetical protein |
| BVU0789/CDS/S0S                     | 43.7  | 5.0  | 28.9 | NA | NA | hypothetical protein |
| BVU2519/CDS/hypothetical            | 87.3  | 10.0 | 28.9 | NA | NA | hypothetical protein |
| TS28Rum00783/CDS/CDS                | 61.0  | 7.0  | 28.8 | NA | NA | hypothetical protein |
| TS28Ali0679/CDS/CDS                 | 165.5 | 19.0 | 28.8 | NA | NA | hypothetical protein |
| Msm1411/CDS/tungsten                | 8.7   | 1.0  | 28.8 | NA | NA | hypothetical protein |
| TS29Bac01389/CDS/CDS                | 13.0  | 1.5  | 28.7 | NA | NA | hypothetical protein |
| TS28Fae01512/CDS/CDS                | 26.0  | 3.0  | 28.7 | NA | NA | hypothetical protein |
| Msm0653/CDS/histidinol-phosphate    | 6.5   | 0.8  | 28.7 | NA | NA | hypothetical protein |
| Msm0154/CDS/homoserine              | 8.7   | 1.0  | 28.7 | NA | NA | hypothetical protein |
| Msm1013/CDS/tetrahydromethanopterin | 13.7  | 1.6  | 28.5 | NA | NA | hypothetical protein |

|                                     |       |      |      |    |    |                      |
|-------------------------------------|-------|------|------|----|----|----------------------|
| BT1957 CDS hypothetical             | 0.6   | 0.1  | 28.5 | NA | NA | hypothetical protein |
| Bsp1162037 CDS CDS                  | 0.6   | 0.1  | 28.5 | NA | NA | hypothetical protein |
| Msm1014 CDS tetrahydromethanopterin | 25.8  | 3.0  | 28.5 | NA | NA | hypothetical protein |
| Bste2174 CDS CDS                    | 86.0  | 10.0 | 28.4 | NA | NA | hypothetical protein |
| TS29Fae04046 CDS CDS                | 43.0  | 5.0  | 28.4 | NA | NA | hypothetical protein |
| Msm1702 CDS UDP-glucose             | 24.3  | 2.8  | 28.3 | NA | NA | hypothetical protein |
| TS29Fae01563 CDS CDS                | 34.0  | 4.0  | 28.1 | NA | NA | hypothetical protein |
| TS28Fae20365 CDS CDS                | 17.0  | 2.0  | 28.1 | NA | NA | hypothetical protein |
| Msm1024 CDS pheromone               | 4.3   | 0.5  | 28.1 | NA | NA | hypothetical protein |
| BVU0581 CDS possible                | 8.5   | 1.0  | 28.1 | NA | NA | hypothetical protein |
| HPAG10230 CDS outer                 | 8.5   | 1.0  | 28.1 | NA | NA | hypothetical protein |
| TS28Bac5992 CDS CDS                 | 34.0  | 4.0  | 28.1 | NA | NA | hypothetical protein |
| TS28RumUnc0539 CDS CDS              | 17.0  | 2.0  | 28.1 | NA | NA | hypothetical protein |
| Rlac0021 CDS CDS                    | 8.5   | 1.0  | 28.1 | NA | NA | hypothetical protein |
| b3691 CDS D-galactonate             | 8.5   | 1.0  | 28.1 | NA | NA | hypothetical protein |
| TS28Par1032 CDS CDS                 | 8.5   | 1.0  | 28.1 | NA | NA | hypothetical protein |
| TS29Fae01621 CDS CDS                | 25.3  | 3.0  | 27.9 | NA | NA | hypothetical protein |
| TS28Clo09678 CDS CDS                | 59.0  | 7.0  | 27.9 | NA | NA | hypothetical protein |
| Msm0031 CDS adhesin-like            | 8.4   | 1.0  | 27.8 | NA | NA | hypothetical protein |
| Bova3911 CDS CDS                    | 8.4   | 1.0  | 27.8 | NA | NA | hypothetical protein |
| TS29Fae09675 CDS CDS                | 67.0  | 8.0  | 27.7 | NA | NA | hypothetical protein |
| TS29Rum15337 CDS CDS                | 8.3   | 1.0  | 27.6 | NA | NA | hypothetical protein |
| TS29Eub1245 CDS CDS                 | 8.3   | 1.0  | 27.6 | NA | NA | hypothetical protein |
| TS29Met0211 CDS CDS                 | 5.4   | 0.7  | 27.5 | NA | NA | hypothetical protein |
| BVU1027 CDS hypothetical            | 54.0  | 6.5  | 27.5 | NA | NA | hypothetical protein |
| TS28Ali0623 CDS CDS                 | 547.0 | 66.0 | 27.4 | NA | NA | hypothetical protein |
| TS29Rum11874 CDS CDS                | 58.0  | 7.0  | 27.4 | NA | NA | hypothetical protein |
| Msm0457 CDS D-3-phosphoglycerate    | 13.1  | 1.6  | 27.4 | NA | NA | hypothetical protein |
| TS28Rum10231 CDS CDS                | 33.0  | 4.0  | 27.3 | NA | NA | hypothetical protein |
| TS28Ali1826 CDS CDS                 | 33.0  | 4.0  | 27.3 | NA | NA | hypothetical protein |
| TS28Clo06588 CDS CDS                | 33.0  | 4.0  | 27.3 | NA | NA | hypothetical protein |
| Buni2356 CDS CDS                    | 24.7  | 3.0  | 27.2 | NA | NA | hypothetical protein |
| Msm1458 CDS hypothetical            | 2.1   | 0.3  | 27.1 | NA | NA | hypothetical protein |
| Msmi741100 CDS CDS                  | 2.1   | 0.3  | 27.1 | NA | NA | hypothetical protein |
| Msm1371 CDS diaminopimelate         | 12.3  | 1.5  | 27.0 | NA | NA | hypothetical protein |
| Pmer0725 CDS CDS                    | 49.0  | 6.0  | 27.0 | NA | NA | hypothetical protein |
| TS28Par1198 CDS CDS                 | 24.5  | 3.0  | 27.0 | NA | NA | hypothetical protein |
| Msmi751581 CDS CDS                  | 10.1  | 1.3  | 26.8 | NA | NA | hypothetical protein |
| TS28Clo07264 CDS CDS                | 113.0 | 14.0 | 26.7 | NA | NA | hypothetical protein |
| BVU2338 CDS RNA                     | 20.2  | 2.5  | 26.7 | NA | NA | hypothetical protein |
| BVU3343 CDS outer                   | 80.7  | 10.0 | 26.7 | NA | NA | hypothetical protein |
| TS28Bac4595 CDS CDS                 | 2.7   | 0.3  | 26.5 | NA | NA | hypothetical protein |
| Bege0845 CDS CDS                    | 0.9   | 0.1  | 26.5 | NA | NA | hypothetical protein |
| Bxv11212 CDS CDS                    | 0.9   | 0.1  | 26.5 | NA | NA | hypothetical protein |
| Bthe3733903 CDS CDS                 | 0.9   | 0.1  | 26.5 | NA | NA | hypothetical protein |
| Bfin1132 CDS CDS                    | 0.9   | 0.1  | 26.5 | NA | NA | hypothetical protein |
| Bthe7332533 CDS CDS                 | 0.9   | 0.1  | 26.5 | NA | NA | hypothetical protein |
| TS28Col1450 CDS CDS                 | 24.0  | 3.0  | 26.5 | NA | NA | hypothetical protein |
| TS29Fae00286 CDS CDS                | 40.0  | 5.0  | 26.5 | NA | NA | hypothetical protein |
| TS29Eub1927 CDS CDS                 | 24.0  | 3.0  | 26.5 | NA | NA | hypothetical protein |
| TS28Ali0678 CDS CDS                 | 40.0  | 5.0  | 26.5 | NA | NA | hypothetical protein |
| Svar0834 CDS CDS                    | 8.0   | 1.0  | 26.5 | NA | NA | hypothetical protein |
| TS28Fae18727 CDS CDS                | 8.0   | 1.0  | 26.5 | NA | NA | hypothetical protein |
| TS28Rum01520 CDS CDS                | 16.0  | 2.0  | 26.5 | NA | NA | hypothetical protein |
| Pmer3039 CDS CDS                    | 16.0  | 2.0  | 26.5 | NA | NA | hypothetical protein |
| HPAG10684 CDS hypothetical          | 8.0   | 1.0  | 26.5 | NA | NA | hypothetical protein |
| TS29Bac06930 CDS CDS                | 8.0   | 1.0  | 26.5 | NA | NA | hypothetical protein |
| TS29Fae06071 CDS CDS                | 4.0   | 0.5  | 26.5 | NA | NA | hypothetical protein |
| TS28Rum02385 CDS CDS                | 16.0  | 2.0  | 26.5 | NA | NA | hypothetical protein |
| TS28Fae09495 CDS CDS                | 4.0   | 0.5  | 26.5 | NA | NA | hypothetical protein |
| CspM6210397 CDS CDS                 | 8.0   | 1.0  | 26.5 | NA | NA | hypothetical protein |
| TS29Fae03224 CDS CDS                | 8.0   | 1.0  | 26.5 | NA | NA | hypothetical protein |
| Rbro0388 CDS CDS                    | 4.0   | 0.5  | 26.5 | NA | NA | hypothetical protein |
| TS28Fae08415 CDS CDS                | 16.0  | 2.0  | 26.5 | NA | NA | hypothetical protein |
| Bste1459 CDS CDS                    | 8.0   | 1.0  | 26.5 | NA | NA | hypothetical protein |
| b2700 CDS conserved                 | 8.0   | 1.0  | 26.5 | NA | NA | hypothetical protein |
| Bple3171 CDS CDS                    | 8.0   | 1.0  | 26.5 | NA | NA | hypothetical protein |
| TS29Fae01210 CDS CDS                | 4.0   | 0.5  | 26.5 | NA | NA | hypothetical protein |
| TS28Clo02036 CDS CDS                | 8.0   | 1.0  | 26.5 | NA | NA | hypothetical protein |
| b0037 CDS predicted                 | 8.0   | 1.0  | 26.5 | NA | NA | hypothetical protein |
| Bova2456 CDS CDS                    | 8.0   | 1.0  | 26.5 | NA | NA | hypothetical protein |
| TS28Rum04558 CDS CDS                | 4.0   | 0.5  | 26.5 | NA | NA | hypothetical protein |
| TS28Rum05387 CDS CDS                | 16.0  | 2.0  | 26.5 | NA | NA | hypothetical protein |
| BL1131 CDS NADPH-quinone            | 2.0   | 0.3  | 26.5 | NA | NA | hypothetical protein |
| TS28Bac2370 CDS CDS                 | 8.0   | 1.0  | 26.5 | NA | NA | hypothetical protein |
| Cbar1309 CDS CDS                    | 8.0   | 1.0  | 26.5 | NA | NA | hypothetical protein |
| TS29Col1353 CDS CDS                 | 4.0   | 0.5  | 26.5 | NA | NA | hypothetical protein |
| Aput0526 CDS CDS                    | 8.0   | 1.0  | 26.5 | NA | NA | hypothetical protein |
| HPAG10287 CDS hypothetical          | 8.0   | 1.0  | 26.5 | NA | NA | hypothetical protein |
| b3562 CDS conserved                 | 8.0   | 1.0  | 26.5 | NA | NA | hypothetical protein |
| TS29Rum18975 CDS CDS                | 8.0   | 1.0  | 26.5 | NA | NA | hypothetical protein |
| b2292 CDS predicted                 | 8.0   | 1.0  | 26.5 | NA | NA | hypothetical protein |
| HPAG11445 CDS DNA                   | 8.0   | 1.0  | 26.5 | NA | NA | hypothetical protein |
| Bege0450 CDS CDS                    | 2.0   | 0.3  | 26.5 | NA | NA | hypothetical protein |
| TS28Clo03748 CDS CDS                | 8.0   | 1.0  | 26.5 | NA | NA | hypothetical protein |
| HPAG10640 CDS protective            | 8.0   | 1.0  | 26.5 | NA | NA | hypothetical protein |
| Bxv12730 CDS CDS                    | 4.0   | 0.5  | 26.5 | NA | NA | hypothetical protein |
| Bdor2808 CDS CDS                    | 16.0  | 2.0  | 26.5 | NA | NA | hypothetical protein |
| Pmer1162 CDS CDS                    | 16.0  | 2.0  | 26.5 | NA | NA | hypothetical protein |
| TS28Ali2301 CDS CDS                 | 8.0   | 1.0  | 26.5 | NA | NA | hypothetical protein |
| TS28Rum06803 CDS CDS                | 4.0   | 0.5  | 26.5 | NA | NA | hypothetical protein |
| TS28Fae02335 CDS CDS                | 8.0   | 1.0  | 26.5 | NA | NA | hypothetical protein |

|                                              |       |      |        |    |    |                      |
|----------------------------------------------|-------|------|--------|----|----|----------------------|
| Pmer1293 CDS CDS                             | 8.0   | 1.0  | 26.5   | NA | NA | hypothetical protein |
| b2407 CDS purine                             | 8.0   | 1.0  | 26.5   | NA | NA | hypothetical protein |
| TS28Par0600 CDS CDS                          | 4.0   | 0.5  | 26.5   | NA | NA | hypothetical protein |
| BVU2208 CDS hypothetical                     | 4.0   | 0.5  | 26.5   | NA | NA | hypothetical protein |
| TS29Bac05182 CDS CDS                         | 4.0   | 0.5  | 26.5   | NA | NA | hypothetical protein |
| TS28Bac6677 CDS CDS                          | 4.0   | 0.5  | 26.5   | NA | NA | hypothetical protein |
| Aput0771 CDS CDS                             | 8.0   | 1.0  | 26.5   | NA | NA | hypothetical protein |
| TS29Fae05270 CDS CDS                         | 4.0   | 0.5  | 26.5   | NA | NA | hypothetical protein |
| Aput2026 CDS CDS                             | 8.0   | 1.0  | 26.5   | NA | NA | hypothetical protein |
| TS29Bac11768 CDS CDS                         | 8.0   | 1.0  | 26.5   | NA | NA | hypothetical protein |
| TS29Rum13953 CDS CDS                         | 8.0   | 1.0  | 26.5   | NA | NA | hypothetical protein |
| Msm0702 CDS prefoldin                        | 4.0   | 0.5  | 26.5   | NA | NA | hypothetical protein |
| Pmer0379 CDS CDS                             | 4.0   | 0.5  | 26.5   | NA | NA | hypothetical protein |
| TS28Eub3035 CDS CDS                          | 8.0   | 1.0  | 26.5   | NA | NA | hypothetical protein |
| Cbol4849 CDS CDS                             | 8.0   | 1.0  | 26.5   | NA | NA | hypothetical protein |
| Aput0909 CDS CDS                             | 16.0  | 2.0  | 26.5   | NA | NA | hypothetical protein |
| Pmer1442 CDS CDS                             | 4.0   | 0.5  | 26.5   | NA | NA | hypothetical protein |
| TS28Rum07351 CDS CDS                         | 4.0   | 0.5  | 26.5   | NA | NA | hypothetical protein |
| Msmi740568 CDS CDS                           | 2.0   | 0.3  | 26.5   | NA | NA | hypothetical protein |
| EUBREC2216 CDS ADP-glucose                   | 16.0  | 2.0  | 26.5   | NA | NA | hypothetical protein |
| TS29Fae02730 CDS CDS                         | 4.0   | 0.5  | 26.5   | NA | NA | hypothetical protein |
| Rma1217 CDS CDS                              | 8.0   | 1.0  | 26.5   | NA | NA | hypothetical protein |
| HPAG10893 CDS rep                            | 8.0   | 1.0  | 26.5   | NA | NA | hypothetical protein |
| Msmi740338 CDS CDS                           | 4.0   | 0.5  | 26.5   | NA | NA | hypothetical protein |
| HPAG10034 CDS hypothetical                   | 16.0  | 2.0  | 26.5   | NA | NA | hypothetical protein |
| HPAG11274 CDS cation                         | 16.0  | 2.0  | 26.5   | NA | NA | hypothetical protein |
| Rtor2060 CDS CDS                             | 4.0   | 0.5  | 26.5   | NA | NA | hypothetical protein |
| Msm0580 CDS putative                         | 2.0   | 0.3  | 26.5   | NA | NA | hypothetical protein |
| Dlon2160 CDS CDS                             | 4.0   | 0.5  | 26.5   | NA | NA | hypothetical protein |
| BactD12190 CDS CDS                           | 2.7   | 0.3  | 26.5   | NA | NA | hypothetical protein |
| TS29Bac08957 CDS CDS                         | 2.7   | 0.3  | 26.5   | NA | NA | hypothetical protein |
| Bxyl4132 CDS CDS                             | 2.7   | 0.3  | 26.5   | NA | NA | hypothetical protein |
| BVU1286 CDS putative                         | 712.2 | 90.0 | 26.2   | NA | NA | hypothetical protein |
| Bova3104 CDS CDS                             | 11.8  | 1.5  | 26.1   | NA | NA | hypothetical protein |
| EUBREC0542 CDS putative                      | 31.5  | 4.0  | 26.0   | NA | NA | hypothetical protein |
| b3003 CDS predicted                          | 7.8   | 1.0  | 25.9   | NA | NA | hypothetical protein |
| Msmi750687 CDS CDS                           | 6.5   | 0.8  | 25.8   | NA | NA | hypothetical protein |
| TS28Clo03129 CDS CDS                         | 39.0  | 5.0  | 25.8   | NA | NA | hypothetical protein |
| TS28Ali0408 CDS CDS                          | 156.0 | 20.0 | 25.8   | NA | NA | hypothetical protein |
| BVU1050 CDS 3-oxoacyl-[acyl-carrier-protein] | 23.3  | 3.0  | 25.7   | NA | NA | hypothetical protein |
| TS28Clo02770 CDS CDS                         | 62.0  | 8.0  | 25.6   | NA | NA | hypothetical protein |
| TS29Fae01743 CDS CDS                         | 38.8  | 5.0  | 25.6   | NA | NA | hypothetical protein |
| BVU0800 CDS SOS                              | 84.9  | 11.0 | 25.5   | NA | NA | hypothetical protein |
| TS28Bac1004 CDS CDS                          | 39.7  | 5.2  | 25.4   | NA | NA | hypothetical protein |
| Msm1403 CDS formate/nitrite                  | 12.8  | 1.7  | 25.4   | NA | NA | hypothetical protein |
| TS28Fae18233 CDS CDS                         | 46.0  | 6.0  | 25.4   | NA | NA | hypothetical protein |
| Msm1418 CDS glutamine                        | 3.5   | 0.5  | 25.4   | NA | NA | hypothetical protein |
| Rtor0085 CDS CDS                             | 7.7   | 1.0  | 25.4   | NA | NA | hypothetical protein |
| b1812 CDS aminodeoxychorismate               | 3.8   | 0.5  | 25.4   | NA | NA | hypothetical protein |
| Msm0622 CDS SOS                              | 6.0   | 0.8  | 25.3   | NA | NA | hypothetical protein |
| Msm0866 CDS Zn                               | 7.7   | 1.0  | 25.3   | NA | NA | hypothetical protein |
| Msm0147 CDS CTP                              | 8.9   | 1.2  | 25.3   | NA | NA | hypothetical protein |
| TS28Clo02091 CDS CDS                         | 61.0  | 8.0  | 25.2   | NA | NA | hypothetical protein |
| BactD20603 CDS CDS                           | 3.8   | 0.5  | 25.1   | NA | NA | hypothetical protein |
| Bova1802 CDS CDS                             | 3.8   | 0.5  | 25.1   | NA | NA | hypothetical protein |
| Bdor0236 CDS CDS                             | 37.8  | 5.0  | 25.0   | NA | NA | hypothetical protein |
| Msm0993 CDS putative                         | 5.0   | 0.7  | 24.8   | NA | NA | hypothetical protein |
| BVU4060 CDS putative                         | 22.5  | 3.0  | 24.8   | NA | NA | hypothetical protein |
| BT4738 CDS formate                           | 2.5   | 0.3  | 24.8   | NA | NA | hypothetical protein |
| Msm1585 CDS adhesin-like                     | 60.0  | 8.0  | 24.8   | NA | NA | hypothetical protein |
| Bste2850 CDS CDS                             | 15.0  | 2.0  | 24.8   | NA | NA | hypothetical protein |
| TS28Clo02362 CDS CDS                         | 15.0  | 2.0  | 24.8   | NA | NA | hypothetical protein |
| Cbar2100 CDS CDS                             | 15.0  | 2.0  | 24.8   | NA | NA | hypothetical protein |
| Bint4554 CDS CDS                             | 15.0  | 2.0  | 24.8   | NA | NA | hypothetical protein |
| b4334 CDS predicted                          | 7.5   | 1.0  | 24.8   | NA | NA | hypothetical protein |
| TS29Bac11809 CDS CDS                         | 15.0  | 2.0  | 24.8   | NA | NA | hypothetical protein |
| TS28Ali0526 CDS CDS                          | 7.5   | 1.0  | 24.8   | NA | NA | hypothetical protein |
| Bova3945 CDS CDS                             | 7.5   | 1.0  | 24.8   | NA | NA | hypothetical protein |
| Bste2931 CDS CDS                             | 7.5   | 1.0  | 24.8   | NA | NA | hypothetical protein |
| b3589 CDS predicted                          | 7.5   | 1.0  | 24.8   | NA | NA | hypothetical protein |
| b3144 CDS predicted                          | 7.5   | 1.0  | 24.8   | NA | NA | hypothetical protein |
| Bste0125 CDS CDS                             | 7.5   | 1.0  | 24.8   | NA | NA | hypothetical protein |
| BactD24006 CDS CDS                           | 7.5   | 1.0  | 24.8   | NA | NA | hypothetical protein |
| TS29Rum09418 CDS CDS                         | 15.0  | 2.0  | 24.8   | NA | NA | hypothetical protein |
| TS28Ali2080 CDS CDS                          | 15.0  | 2.0  | 24.8   | NA | NA | hypothetical protein |
| Msm1472 CDS hypothetical                     | 6.8   | 0.9  | 24.7   | NA | NA | hypothetical protein |
| TS28Ali2090 CDS CDS                          | 148.7 | 20.0 | 24.6   | NA | NA | hypothetical protein |
| TS28Fae17636 CDS CDS                         | 37.0  | 5.0  | 24.5   | NA | NA | hypothetical protein |
| TS28Ali0070 CDS CDS                          | 74.0  | 10.0 | 24.5   | NA | NA | hypothetical protein |
| Bste0575 CDS CDS                             | 3.7   | 0.5  | 24.3   | NA | NA | hypothetical protein |
| FpraM2121052 CDS CDS                         | 7.3   | 1.0  | 24.3   | NA | NA | hypothetical protein |
| Msm0654 CDS carbonic                         | 5.5   | 0.8  | 24.3   | NA | NA | hypothetical protein |
| TS28Clo02775 CDS CDS                         | 22.0  | 3.0  | 24.3   | NA | NA | hypothetical protein |
| BVU3859 CDS hypothetical                     | 40.3  | 5.5  | 24.3   | NA | NA | hypothetical protein |
| str1542 CDS cytoplasmic                      | 3.7   | 0.5  | 24.251 | NA | NA | hypothetical protein |
| Msm0932 CDS hypothetical                     | 3.7   | 0.5  | 24.251 | NA | NA | hypothetical protein |
| Bxyl1657 CDS CDS                             | 3.7   | 0.5  | 24.251 | NA | NA | hypothetical protein |
| stul1542 CDS cytoplasmic                     | 3.7   | 0.5  | 24.251 | NA | NA | hypothetical protein |
| BVU3269 CDS two-component                    | 14.5  | 2.0  | 23.975 | NA | NA | hypothetical protein |
| Bdor3704 CDS CDS                             | 14.5  | 2.0  | 23.975 | NA | NA | hypothetical protein |
| Bdor3607 CDS CDS                             | 58.0  | 8.0  | 23.975 | NA | NA | hypothetical protein |
| Bdor4064 CDS CDS                             | 29.0  | 4.0  | 23.975 | NA | NA | hypothetical protein |



|                                   |       |      |        |    |    |                      |
|-----------------------------------|-------|------|--------|----|----|----------------------|
| TS29Fae01016/CDS/CDS              | 7.3   | 1.0  | 23.975 | NA | NA | hypothetical protein |
| Bxvl2080/CDS/CDS                  | 1.5   | 0.2  | 23.975 | NA | NA | hypothetical protein |
| Msm0954/CDS/predicted             | 14.5  | 2.0  | 23.975 | NA | NA | hypothetical protein |
| Msm0439/CDS/vacuolar-type         | 2.9   | 0.4  | 23.975 | NA | NA | hypothetical protein |
| BactD11293/CDS/CDS                | 1.8   | 0.3  | 23.936 | NA | NA | hypothetical protein |
| BVU3610/CDS/hypothetical          | 10.8  | 1.5  | 23.883 | NA | NA | hypothetical protein |
| BactD12055/CDS/CDS                | 2.4   | 0.3  | 23.810 | NA | NA | hypothetical protein |
| Bxvl0959/CDS/CDS                  | 2.4   | 0.3  | 23.810 | NA | NA | hypothetical protein |
| Msm0796/CDS/heterodisulfide       | 23.3  | 3.3  | 23.742 | NA | NA | hypothetical protein |
| b3407/CDS/predicted               | 7.2   | 1.0  | 23.700 | NA | NA | hypothetical protein |
| BVU0885/CDS/lycosyltransferase    | 7.2   | 1.0  | 23.700 | NA | NA | hypothetical protein |
| TS28Bac3843/CDS/CDS               | 7.2   | 1.0  | 23.700 | NA | NA | hypothetical protein |
| Msmi741131/CDS/CDS                | 4.8   | 0.7  | 23.562 | NA | NA | hypothetical protein |
| Msmi750546/CDS/CDS                | 4.8   | 0.7  | 23.562 | NA | NA | hypothetical protein |
| TS28Met1065/CDS/CDS               | 4.8   | 0.7  | 23.562 | NA | NA | hypothetical protein |
| TS28Ali1360/CDS/CDS               | 121.0 | 17.0 | 23.538 | NA | NA | hypothetical protein |
| TS28Fae12734/CDS/CDS              | 78.0  | 11.0 | 23.449 | NA | NA | hypothetical protein |
| TS28Clo2774/CDS/CDS               | 248.0 | 35.0 | 23.432 | NA | NA | hypothetical protein |
| TS28Ali1252/CDS/CDS               | 197.5 | 28.0 | 23.326 | NA | NA | hypothetical protein |
| BactD22971/CDS/CDS                | 2.3   | 0.3  | 23.149 | NA | NA | hypothetical protein |
| BT4002/CDS/ATPase                 | 2.3   | 0.3  | 23.149 | NA | NA | hypothetical protein |
| Bsp1162318/CDS/CDS                | 2.3   | 0.3  | 23.149 | NA | NA | hypothetical protein |
| TS29Rum12973/CDS/CDS              | 2.3   | 0.3  | 23.149 | NA | NA | hypothetical protein |
| Msm1119/CDS/hypothetical          | 4.7   | 0.7  | 23.149 | NA | NA | hypothetical protein |
| EFER3766/CDS/RNA                  | 7.0   | 1.0  | 23.149 | NA | NA | hypothetical protein |
| TS29Rum05538/CDS/CDS              | 4.7   | 0.7  | 23.149 | NA | NA | hypothetical protein |
| BVU3198/CDS/putative              | 52.5  | 7.5  | 23.149 | NA | NA | hypothetical protein |
| Cbar0165/CDS/CDS                  | 14.0  | 2.0  | 23.149 | NA | NA | hypothetical protein |
| Bste2230/CDS/CDS                  | 14.0  | 2.0  | 23.149 | NA | NA | hypothetical protein |
| PRABACTJOHN2647/CDS/CDS           | 7.0   | 1.0  | 23.149 | NA | NA | hypothetical protein |
| TS28Clo09437/CDS/CDS              | 7.0   | 1.0  | 23.149 | NA | NA | hypothetical protein |
| TS29Rum11840/CDS/CDS              | 7.0   | 1.0  | 23.149 | NA | NA | hypothetical protein |
| Bova0453/CDS/CDS                  | 7.0   | 1.0  | 23.149 | NA | NA | hypothetical protein |
| TS29Rum20539/CDS/CDS              | 7.0   | 1.0  | 23.149 | NA | NA | hypothetical protein |
| BactD10240/CDS/CDS                | 3.5   | 0.5  | 23.149 | NA | NA | hypothetical protein |
| TS28RumUnc1061/CDS/CDS            | 7.0   | 1.0  | 23.149 | NA | NA | hypothetical protein |
| TS28Col0207/CDS/CDS               | 14.0  | 2.0  | 23.149 | NA | NA | hypothetical protein |
| TS28Bac0696/CDS/CDS               | 3.5   | 0.5  | 23.149 | NA | NA | hypothetical protein |
| TS28Bac8374/CDS/CDS               | 3.5   | 0.5  | 23.149 | NA | NA | hypothetical protein |
| TS28Rum15903/CDS/CDS              | 42.0  | 6.0  | 23.149 | NA | NA | hypothetical protein |
| TS28Fae06925/CDS/CDS              | 14.0  | 2.0  | 23.149 | NA | NA | hypothetical protein |
| Cbar1166/CDS/CDS                  | 7.0   | 1.0  | 23.149 | NA | NA | hypothetical protein |
| TS28Rum10230/CDS/CDS              | 35.0  | 5.0  | 23.149 | NA | NA | hypothetical protein |
| EURBREC0767/CDS/hypothetical      | 3.5   | 0.5  | 23.149 | NA | NA | hypothetical protein |
| Bcro0095/CDS/CDS                  | 7.0   | 1.0  | 23.149 | NA | NA | hypothetical protein |
| Robe2615/CDS/CDS                  | 7.0   | 1.0  | 23.149 | NA | NA | hypothetical protein |
| Pmer0241/CDS/CDS                  | 3.5   | 0.5  | 23.149 | NA | NA | hypothetical protein |
| Dfor2402/CDS/CDS                  | 7.0   | 1.0  | 23.149 | NA | NA | hypothetical protein |
| HPAG10375/CDS/copper-transporting | 7.0   | 1.0  | 23.149 | NA | NA | hypothetical protein |
| Dfor2465/CDS/CDS                  | 7.0   | 1.0  | 23.149 | NA | NA | hypothetical protein |
| TS28Fae08893/CDS/CDS              | 7.0   | 1.0  | 23.149 | NA | NA | hypothetical protein |
| TS29Bac01575/CDS/CDS              | 7.0   | 1.0  | 23.149 | NA | NA | hypothetical protein |
| TS28Fae07113/CDS/CDS              | 14.0  | 2.0  | 23.149 | NA | NA | hypothetical protein |
| TS28Clo08589/CDS/CDS              | 7.0   | 1.0  | 23.149 | NA | NA | hypothetical protein |
| TS28Ali0717/CDS/CDS               | 28.0  | 4.0  | 23.149 | NA | NA | hypothetical protein |
| Msm0852/CDS/predicted             | 1.8   | 0.3  | 23.149 | NA | NA | hypothetical protein |
| TS28Fae14572/CDS/CDS              | 7.0   | 1.0  | 23.149 | NA | NA | hypothetical protein |
| Ccom1704/CDS/CDS                  | 7.0   | 1.0  | 23.149 | NA | NA | hypothetical protein |
| Bdor3591/CDS/CDS                  | 35.0  | 5.0  | 23.149 | NA | NA | hypothetical protein |
| HPAG10559/CDS/hypothetical        | 7.0   | 1.0  | 23.149 | NA | NA | hypothetical protein |
| TS29Rum00252/CDS/CDS              | 7.0   | 1.0  | 23.149 | NA | NA | hypothetical protein |
| TS29Bac11216/CDS/CDS              | 7.0   | 1.0  | 23.149 | NA | NA | hypothetical protein |
| Bfin1178/CDS/CDS                  | 7.0   | 1.0  | 23.149 | NA | NA | hypothetical protein |
| TS29Rum14225/CDS/CDS              | 7.0   | 1.0  | 23.149 | NA | NA | hypothetical protein |
| TS28Bac6640/CDS/CDS               | 3.5   | 0.5  | 23.149 | NA | NA | hypothetical protein |
| BactD22860/CDS/CDS                | 7.0   | 1.0  | 23.149 | NA | NA | hypothetical protein |
| TS28RumUnc1811/CDS/CDS            | 7.0   | 1.0  | 23.149 | NA | NA | hypothetical protein |
| Cbar1454/CDS/CDS                  | 7.0   | 1.0  | 23.149 | NA | NA | hypothetical protein |
| Csvm2463/CDS/CDS                  | 7.0   | 1.0  | 23.149 | NA | NA | hypothetical protein |
| TS29Bac07953/CDS/CDS              | 3.5   | 0.5  | 23.149 | NA | NA | hypothetical protein |
| HPAG10031/CDS/ATP-dependent       | 7.0   | 1.0  | 23.149 | NA | NA | hypothetical protein |
| TS28Fae09784/CDS/CDS              | 7.0   | 1.0  | 23.149 | NA | NA | hypothetical protein |
| PRABACTJOHN2234/CDS/CDS           | 7.0   | 1.0  | 23.149 | NA | NA | hypothetical protein |
| TS29Bac05948/CDS/CDS              | 7.0   | 1.0  | 23.149 | NA | NA | hypothetical protein |
| TS29Rum10339/CDS/CDS              | 7.0   | 1.0  | 23.149 | NA | NA | hypothetical protein |
| TS29Rum12282/CDS/CDS              | 7.0   | 1.0  | 23.149 | NA | NA | hypothetical protein |
| TS28Bac0258/CDS/CDS               | 3.5   | 0.5  | 23.149 | NA | NA | hypothetical protein |
| TS28Rum16007/CDS/CDS              | 35.0  | 5.0  | 23.149 | NA | NA | hypothetical protein |
| TS28Fae08102/CDS/CDS              | 14.0  | 2.0  | 23.149 | NA | NA | hypothetical protein |
| Even1363/CDS/CDS                  | 7.0   | 1.0  | 23.149 | NA | NA | hypothetical protein |
| Bova1220/CDS/CDS                  | 7.0   | 1.0  | 23.149 | NA | NA | hypothetical protein |
| TS28Rum12904/CDS/CDS              | 7.0   | 1.0  | 23.149 | NA | NA | hypothetical protein |
| TS29Rum11984/CDS/CDS              | 7.0   | 1.0  | 23.149 | NA | NA | hypothetical protein |
| Ccom1113/CDS/CDS                  | 7.0   | 1.0  | 23.149 | NA | NA | hypothetical protein |
| Pmer2749/CDS/CDS                  | 14.0  | 2.0  | 23.149 | NA | NA | hypothetical protein |
| TS28Fae03909/CDS/CDS              | 7.0   | 1.0  | 23.149 | NA | NA | hypothetical protein |
| Bste1850/CDS/CDS                  | 7.0   | 1.0  | 23.149 | NA | NA | hypothetical protein |
| FpraM2122218/CDS/CDS              | 7.0   | 1.0  | 23.149 | NA | NA | hypothetical protein |
| TS28Fae22172/CDS/CDS              | 7.0   | 1.0  | 23.149 | NA | NA | hypothetical protein |
| TS29Bac09117/CDS/CDS              | 7.0   | 1.0  | 23.149 | NA | NA | hypothetical protein |
| TS28Rum11154/CDS/CDS              | 7.0   | 1.0  | 23.149 | NA | NA | hypothetical protein |
| Bthe3730729/CDS/CDS               | 7.0   | 1.0  | 23.149 | NA | NA | hypothetical protein |

|                                         |       |      |        |    |    |                      |
|-----------------------------------------|-------|------|--------|----|----|----------------------|
| TS28Clo08495 CDS CDS                    | 7.0   | 1.0  | 23.149 | NA | NA | hypothetical protein |
| Cbar2055 CDS CDS                        | 7.0   | 1.0  | 23.149 | NA | NA | hypothetical protein |
| EUBREC2729 CDS hypothetical             | 3.5   | 0.5  | 23.149 | NA | NA | hypothetical protein |
| TS29RumUnc0315 CDS CDS                  | 7.0   | 1.0  | 23.149 | NA | NA | hypothetical protein |
| TS28Fae01396 CDS CDS                    | 7.0   | 1.0  | 23.149 | NA | NA | hypothetical protein |
| Dfor0385 CDS CDS                        | 7.0   | 1.0  | 23.149 | NA | NA | hypothetical protein |
| TS29Eub1926 CDS CDS                     | 7.0   | 1.0  | 23.149 | NA | NA | hypothetical protein |
| TS28Rum15313 CDS CDS                    | 7.0   | 1.0  | 23.149 | NA | NA | hypothetical protein |
| HPAG10764 CDS bifunctional              | 7.0   | 1.0  | 23.149 | NA | NA | hypothetical protein |
| Msmi741221 CDS CDS                      | 7.0   | 1.0  | 23.149 | NA | NA | hypothetical protein |
| TS29Fae06161 CDS CDS                    | 7.0   | 1.0  | 23.149 | NA | NA | hypothetical protein |
| HPAG11409 CDS putative                  | 7.0   | 1.0  | 23.149 | NA | NA | hypothetical protein |
| TS28Ali0882 CDS CDS                     | 7.0   | 1.0  | 23.149 | NA | NA | hypothetical protein |
| Dfor1021 CDS CDS                        | 7.0   | 1.0  | 23.149 | NA | NA | hypothetical protein |
| TS29Bac09424 CDS CDS                    | 14.0  | 2.0  | 23.149 | NA | NA | hypothetical protein |
| Even1954 CDS CDS                        | 7.0   | 1.0  | 23.149 | NA | NA | hypothetical protein |
| TS28Par1461 CDS CDS                     | 7.0   | 1.0  | 23.149 | NA | NA | hypothetical protein |
| Robe1069 CDS CDS                        | 3.5   | 0.5  | 23.149 | NA | NA | hypothetical protein |
| TS28RumUnc0277 CDS CDS                  | 7.0   | 1.0  | 23.149 | NA | NA | hypothetical protein |
| HPAG11183 CDS alanyl-tRNA               | 7.0   | 1.0  | 23.149 | NA | NA | hypothetical protein |
| Bthe3732923 CDS CDS                     | 7.0   | 1.0  | 23.149 | NA | NA | hypothetical protein |
| Msm1056 CDS 6-pyruvovl-tetrahydropterin | 3.5   | 0.5  | 23.149 | NA | NA | hypothetical protein |
| Bste1799 CDS CDS                        | 3.5   | 0.5  | 23.149 | NA | NA | hypothetical protein |
| TS28Rum05265 CDS CDS                    | 14.0  | 2.0  | 23.149 | NA | NA | hypothetical protein |
| b0523 CDS N5-carboxyaminoimidazole      | 7.0   | 1.0  | 23.149 | NA | NA | hypothetical protein |
| BactD11392 CDS CDS                      | 2.3   | 0.3  | 23.149 | NA | NA | hypothetical protein |
| TS29Bac00797 CDS CDS                    | 2.3   | 0.3  | 23.149 | NA | NA | hypothetical protein |
| BVU2570 CDS hypothetical                | 38.3  | 5.5  | 23.048 | NA | NA | hypothetical protein |
| TS28Rum14625 CDS CDS                    | 20.8  | 3.0  | 22.965 | NA | NA | hypothetical protein |
| TS28Fae21577 CDS CDS                    | 55.5  | 8.0  | 22.942 | NA | NA | hypothetical protein |
| Msm1202 CDS branched-chain-amino-acid   | 4.0   | 0.6  | 22.865 | NA | NA | hypothetical protein |
| BVU0512 CDS two-component               | 10.3  | 1.5  | 22.781 | NA | NA | hypothetical protein |
| TS28Fae12331 CDS CDS                    | 55.0  | 8.0  | 22.735 | NA | NA | hypothetical protein |
| Msm1735 CDS adhesin-like                | 8.0   | 1.2  | 22.676 | NA | NA | hypothetical protein |
| BLD1770 CDS Putative                    | 2.3   | 0.3  | 22.322 | NA | NA | hypothetical protein |
| Bova2144 CDS CDS                        | 2.3   | 0.3  | 22.322 | NA | NA | hypothetical protein |
| BactD14049 CDS CDS                      | 2.3   | 0.3  | 22.322 | NA | NA | hypothetical protein |
| TS28Ali0084 CDS CDS                     | 54.0  | 8.0  | 22.322 | NA | NA | hypothetical protein |
| TS28Rum10451 CDS CDS                    | 13.5  | 2.0  | 22.322 | NA | NA | hypothetical protein |
| TS28Bac0563 CDS CDS                     | 13.5  | 2.0  | 22.322 | NA | NA | hypothetical protein |
| BVU2965 CDS hypothetical                | 13.5  | 2.0  | 22.322 | NA | NA | hypothetical protein |
| TS29Fae09130 CDS CDS                    | 6.8   | 1.0  | 22.322 | NA | NA | hypothetical protein |
| Bste0897 CDS CDS                        | 13.5  | 2.0  | 22.322 | NA | NA | hypothetical protein |
| BVU3041 CDS hypothetical                | 34.8  | 5.2  | 22.295 | NA | NA | hypothetical protein |
| Bumi0266 CDS CDS                        | 128.0 | 19.0 | 22.278 | NA | NA | hypothetical protein |
| TS28Ali1250 CDS CDS                     | 37.0  | 5.5  | 22.247 | NA | NA | hypothetical protein |
| BVU2712 CDS hypothetical                | 47.0  | 7.0  | 22.204 | NA | NA | hypothetical protein |
| TS28Clo05823 CDS CDS                    | 127.0 | 19.0 | 22.104 | NA | NA | hypothetical protein |
| Msmi750766 CDS CDS                      | 13.4  | 2.0  | 22.074 | NA | NA | hypothetical protein |
| Msmi740081 CDS CDS                      | 3.3   | 0.5  | 22.046 | NA | NA | hypothetical protein |
| TS28Clo04582 CDS CDS                    | 20.0  | 3.0  | 22.046 | NA | NA | hypothetical protein |
| Bumi2847 CDS CDS                        | 3.3   | 0.5  | 22.046 | NA | NA | hypothetical protein |
| Msm0107 CDS hydrogenase                 | 8.3   | 1.3  | 22.046 | NA | NA | hypothetical protein |
| BVU4104 CDS putative                    | 3.3   | 0.5  | 22.046 | NA | NA | hypothetical protein |
| Pmer2076 CDS CDS                        | 3.3   | 0.5  | 22.046 | NA | NA | hypothetical protein |
| HPAG11127 CDS hypothetical              | 2.2   | 0.3  | 21.826 | NA | NA | hypothetical protein |
| Msm1528 CDS predicted                   | 16.5  | 2.5  | 21.826 | NA | NA | hypothetical protein |
| TS28Met0022 CDS CDS                     | 16.5  | 2.5  | 21.826 | NA | NA | hypothetical protein |
| TS28Ali0122 CDS CDS                     | 66.0  | 10.0 | 21.826 | NA | NA | hypothetical protein |
| TS28Fae04553 CDS CDS                    | 46.0  | 7.0  | 21.731 | NA | NA | hypothetical protein |
| Msm1412 CDS tungsten                    | 15.1  | 2.3  | 21.639 | NA | NA | hypothetical protein |
| Bdor3550 CDS CDS                        | 16.3  | 2.5  | 21.605 | NA | NA | hypothetical protein |
| TS28Clo02076 CDS CDS                    | 111.0 | 17.0 | 21.592 | NA | NA | hypothetical protein |
| Msm0198 CDS inorganic                   | 3.8   | 0.6  | 21.542 | NA | NA | hypothetical protein |
| TS28Fae15725 CDS CDS                    | 143.2 | 22.0 | 21.520 | NA | NA | hypothetical protein |
| BVU3153 CDS hypothetical                | 19.5  | 3.0  | 21.495 | NA | NA | hypothetical protein |
| Bste2608 CDS CDS                        | 13.0  | 2.0  | 21.495 | NA | NA | hypothetical protein |
| Bdor1207 CDS CDS                        | 6.5   | 1.0  | 21.495 | NA | NA | hypothetical protein |
| Bxyl0775 CDS CDS                        | 6.5   | 1.0  | 21.495 | NA | NA | hypothetical protein |
| TS28Fae20341 CDS CDS                    | 13.0  | 2.0  | 21.495 | NA | NA | hypothetical protein |
| EUBREC3652 CDS hypothetical             | 13.0  | 2.0  | 21.495 | NA | NA | hypothetical protein |
| TS29Rum00345 CDS CDS                    | 3.3   | 0.5  | 21.495 | NA | NA | hypothetical protein |
| TS29Bac12204 CDS CDS                    | 6.5   | 1.0  | 21.495 | NA | NA | hypothetical protein |
| TS29Rum13310 CDS CDS                    | 6.5   | 1.0  | 21.495 | NA | NA | hypothetical protein |
| TS28Clo04463 CDS CDS                    | 13.0  | 2.0  | 21.495 | NA | NA | hypothetical protein |
| b4336 CDS conserved                     | 6.5   | 1.0  | 21.495 | NA | NA | hypothetical protein |
| TS28Par1009 CDS CDS                     | 6.5   | 1.0  | 21.495 | NA | NA | hypothetical protein |
| Bumi1588 CDS CDS                        | 26.0  | 4.0  | 21.495 | NA | NA | hypothetical protein |
| Brvfor4421 CDS CDS                      | 6.5   | 1.0  | 21.495 | NA | NA | hypothetical protein |

|                                       |       |      |        |    |    |                      |
|---------------------------------------|-------|------|--------|----|----|----------------------|
| TS28Col0689/CDS/CDS                   | 13.0  | 2.0  | 21.495 | NA | NA | hypothetical protein |
| TS28Fae04617/CDS/CDS                  | 13.0  | 2.0  | 21.495 | NA | NA | hypothetical protein |
| Dfor0621/CDS/CDS                      | 6.5   | 1.0  | 21.495 | NA | NA | hypothetical protein |
| TS29Bac01780/CDS/CDS                  | 4.3   | 0.7  | 21.495 | NA | NA | hypothetical protein |
| Buni1961/CDS/CDS                      | 4.3   | 0.7  | 21.495 | NA | NA | hypothetical protein |
| BVU2305/CDS/hypothetical              | 292.0 | 45.0 | 21.458 | NA | NA | hypothetical protein |
| TS28Ali1359/CDS/CDS                   | 415.0 | 64.0 | 21.443 | NA | NA | hypothetical protein |
| TS29Bac09240/CDS/CDS                  | 18.3  | 2.8  | 21.398 | NA | NA | hypothetical protein |
| FpraM2121900/CDS/CDS                  | 19.3  | 3.0  | 21.311 | NA | NA | hypothetical protein |
| TS28Fae21570/CDS/CDS                  | 528.0 | 82.0 | 21.293 | NA | NA | hypothetical protein |
| Msmi750883/CDS/CDS                    | 7.5   | 1.2  | 21.259 | NA | NA | hypothetical protein |
| TS28Fae05702/CDS/CDS                  | 45.0  | 7.0  | 21.259 | NA | NA | hypothetical protein |
| Msm1007/CDS/tetrahydromethanopterin   | 19.3  | 3.0  | 21.219 | NA | NA | hypothetical protein |
| TS28Bac7637/CDS/CDS                   | 12.8  | 2.0  | 21.219 | NA | NA | hypothetical protein |
| Bdor3258/CDS/CDS                      | 12.8  | 2.0  | 21.219 | NA | NA | hypothetical protein |
| Msm1069/CDS/energy-converting         | 1.6   | 0.3  | 21.164 | NA | NA | hypothetical protein |
| TS29Fae08625/CDS/CDS                  | 51.0  | 8.0  | 21.082 | NA | NA | hypothetical protein |
| TS29Eub1925/CDS/CDS                   | 44.5  | 7.0  | 21.023 | NA | NA | hypothetical protein |
| EUBREC2215/CDS/glucose-1-phosphate    | 9.5   | 1.5  | 20.944 | NA | NA | hypothetical protein |
| Msmi741479/CDS/CDS                    | 6.3   | 1.0  | 20.944 | NA | NA | hypothetical protein |
| b0462/CDS/multidrug                   | 6.3   | 1.0  | 20.944 | NA | NA | hypothetical protein |
| BVU1160/CDS/larvsulfatase             | 21.0  | 3.3  | 20.834 | NA | NA | hypothetical protein |
| Msm1414/CDS/tungsten                  | 4.4   | 0.7  | 20.786 | NA | NA | hypothetical protein |
| Bova3099/CDS/CDS                      | 22.0  | 3.5  | 20.786 | NA | NA | hypothetical protein |
| TS29Bac00519/CDS/CDS                  | 6.3   | 1.0  | 20.786 | NA | NA | hypothetical protein |
| Msm0559/CDS/pyruvate:ferredoxin       | 18.8  | 3.0  | 20.742 | NA | NA | hypothetical protein |
| b0074/CDS/2-isonopropylmalate         | 12.5  | 2.0  | 20.668 | NA | NA | hypothetical protein |
| TS28Clo07297/CDS/CDS                  | 12.5  | 2.0  | 20.668 | NA | NA | hypothetical protein |
| Cbar2604/CDS/CDS                      | 12.5  | 2.0  | 20.668 | NA | NA | hypothetical protein |
| TS28Fae17952/CDS/CDS                  | 25.0  | 4.0  | 20.668 | NA | NA | hypothetical protein |
| BVU0012/CDS/30S                       | 25.0  | 4.0  | 20.668 | NA | NA | hypothetical protein |
| b0922/CDS/Involved                    | 6.3   | 1.0  | 20.668 | NA | NA | hypothetical protein |
| PRABACTJOHN1062/CDS/CDS               | 28.0  | 4.5  | 20.576 | NA | NA | hypothetical protein |
| BVU3897/CDS/putative                  | 9.3   | 1.5  | 20.576 | NA | NA | hypothetical protein |
| BVU3771/CDS/small                     | 43.5  | 7.0  | 20.550 | NA | NA | hypothetical protein |
| TS28Ali0569/CDS/CDS                   | 31.0  | 5.0  | 20.503 | NA | NA | hypothetical protein |
| BVU1171/CDS/putative                  | 6.2   | 1.0  | 20.393 | NA | NA | hypothetical protein |
| TS28Dor1132/CDS/CDS                   | 18.5  | 3.0  | 20.393 | NA | NA | hypothetical protein |
| TS28Fae18047/CDS/CDS                  | 18.5  | 3.0  | 20.393 | NA | NA | hypothetical protein |
| TS28Fae07504/CDS/CDS                  | 37.0  | 6.0  | 20.393 | NA | NA | hypothetical protein |
| TS29Bac01386/CDS/CDS                  | 24.7  | 4.0  | 20.393 | NA | NA | hypothetical protein |
| BVU2971/CDS/Recombination             | 8.2   | 1.3  | 20.255 | NA | NA | hypothetical protein |
| Bdor3598/CDS/CDS                      | 21.3  | 3.5  | 20.157 | NA | NA | hypothetical protein |
| BVU0792/CDS/30S                       | 36.5  | 6.0  | 20.117 | NA | NA | hypothetical protein |
| TS28Ali1244/CDS/CDS                   | 175.0 | 29.0 | 19.956 | NA | NA | hypothetical protein |
| Msm0881/CDS/porphobilinogen           | 13.0  | 2.2  | 19.892 | NA | NA | hypothetical protein |
| TS29Bac04377/CDS/CDS                  | 2.0   | 0.3  | 19.842 | NA | NA | hypothetical protein |
| BLD1908/CDS/neutral                   | 2.0   | 0.3  | 19.842 | NA | NA | hypothetical protein |
| BactD11137/CDS/CDS                    | 2.0   | 0.3  | 19.842 | NA | NA | hypothetical protein |
| Msmi740056/CDS/CDS                    | 2.0   | 0.3  | 19.842 | NA | NA | hypothetical protein |
| BactD11147/CDS/CDS                    | 2.0   | 0.3  | 19.842 | NA | NA | hypothetical protein |
| BactD12681/CDS/CDS                    | 2.0   | 0.3  | 19.842 | NA | NA | hypothetical protein |
| Msmi740374/CDS/CDS                    | 2.0   | 0.3  | 19.842 | NA | NA | hypothetical protein |
| Bxyl3055/CDS/CDS                      | 2.0   | 0.3  | 19.842 | NA | NA | hypothetical protein |
| TS29Met0536/CDS/CDS                   | 2.0   | 0.3  | 19.842 | NA | NA | hypothetical protein |
| STER1722/CDS/lexinuclease             | 2.0   | 0.3  | 19.842 | NA | NA | hypothetical protein |
| Pmer3147/CDS/CDS                      | 9.0   | 1.5  | 19.842 | NA | NA | hypothetical protein |
| Msm1795/CDS/predicted                 | 9.0   | 1.5  | 19.842 | NA | NA | hypothetical protein |
| TS28RumUnc1280/CDS/CDS                | 36.0  | 6.0  | 19.842 | NA | NA | hypothetical protein |
| TS28Clo01242/CDS/CDS                  | 102.0 | 17.0 | 19.842 | NA | NA | hypothetical protein |
| TS28Met1238/CDS/CDS                   | 7.5   | 1.3  | 19.842 | NA | NA | hypothetical protein |
| Rena2950/CDS/CDS                      | 15.0  | 2.5  | 19.842 | NA | NA | hypothetical protein |
| HPAG11097/CDS/pyrroline-5-carboxylate | 6.0   | 1.0  | 19.842 | NA | NA | hypothetical protein |
| TS29Fae05069/CDS/CDS                  | 6.0   | 1.0  | 19.842 | NA | NA | hypothetical protein |
| Msm0757/CDS/50S                       | 1.5   | 0.3  | 19.842 | NA | NA | hypothetical protein |
| Pmer2710/CDS/CDS                      | 12.0  | 2.0  | 19.842 | NA | NA | hypothetical protein |
| TS28RumUnc0646/CDS/CDS                | 12.0  | 2.0  | 19.842 | NA | NA | hypothetical protein |
| TS29Rum11382/CDS/CDS                  | 6.0   | 1.0  | 19.842 | NA | NA | hypothetical protein |
| Cbar2144/CDS/CDS                      | 6.0   | 1.0  | 19.842 | NA | NA | hypothetical protein |
| Bste0234/CDS/CDS                      | 6.0   | 1.0  | 19.842 | NA | NA | hypothetical protein |
| Cste1153/CDS/CDS                      | 6.0   | 1.0  | 19.842 | NA | NA | hypothetical protein |
| Robe0359/CDS/CDS                      | 6.0   | 1.0  | 19.842 | NA | NA | hypothetical protein |
| Bste1301/CDS/CDS                      | 6.0   | 1.0  | 19.842 | NA | NA | hypothetical protein |
| TS29Fae00458/CDS/CDS                  | 6.0   | 1.0  | 19.842 | NA | NA | hypothetical protein |
| Cbar1167/CDS/CDS                      | 12.0  | 2.0  | 19.842 | NA | NA | hypothetical protein |
| TS28Clo06462/CDS/CDS                  | 6.0   | 1.0  | 19.842 | NA | NA | hypothetical protein |
| Ehal0743/CDS/CDS                      | 6.0   | 1.0  | 19.842 | NA | NA | hypothetical protein |
| TS28Fae12240/CDS/CDS                  | 6.0   | 1.0  | 19.842 | NA | NA | hypothetical protein |
| HPAG11393/CDS/type                    | 6.0   | 1.0  | 19.842 | NA | NA | hypothetical protein |
| b0269/CDS/CP4-6                       | 6.0   | 1.0  | 19.842 | NA | NA | hypothetical protein |
| TS28Fae10328/CDS/CDS                  | 6.0   | 1.0  | 19.842 | NA | NA | hypothetical protein |
| TS28Rum05596/CDS/CDS                  | 12.0  | 2.0  | 19.842 | NA | NA | hypothetical protein |
| TS28Clo08471/CDS/CDS                  | 6.0   | 1.0  | 19.842 | NA | NA | hypothetical protein |
| b3024/CDS/conserved                   | 6.0   | 1.0  | 19.842 | NA | NA | hypothetical protein |
| TS29Bac03632/CDS/CDS                  | 6.0   | 1.0  | 19.842 | NA | NA | hypothetical protein |
| TS28Ali1831/CDS/CDS                   | 6.0   | 1.0  | 19.842 | NA | NA | hypothetical protein |
| TS28Rum00807/CDS/CDS                  | 6.0   | 1.0  | 19.842 | NA | NA | hypothetical protein |
| TS28Bac2287/CDS/CDS                   | 6.0   | 1.0  | 19.842 | NA | NA | hypothetical protein |
| Msm0832/CDS/aspartate                 | 13.5  | 2.3  | 19.842 | NA | NA | hypothetical protein |
| TS29Rum14185/CDS/CDS                  | 12.0  | 2.0  | 19.842 | NA | NA | hypothetical protein |
| TS28Fae01478/CDS/CDS                  | 6.0   | 1.0  | 19.842 | NA | NA | hypothetical protein |
| TS29Rum13033/CDS/CDS                  | 6.0   | 1.0  | 19.842 | NA | NA | hypothetical protein |

|                                                              |       |      |        |    |    |                      |
|--------------------------------------------------------------|-------|------|--------|----|----|----------------------|
| TS29Bac09926/CDS/CDS                                         | 6.0   | 1.0  | 19.842 | NA | NA | hypothetical protein |
| Cnex0884/CDS/CDS                                             | 6.0   | 1.0  | 19.842 | NA | NA | hypothetical protein |
| Beap0861/CDS/CDS                                             | 6.0   | 1.0  | 19.842 | NA | NA | hypothetical protein |
| TS29Rum06012/CDS/CDS                                         | 6.0   | 1.0  | 19.842 | NA | NA | hypothetical protein |
| b0511/CDS/predicted                                          | 6.0   | 1.0  | 19.842 | NA | NA | hypothetical protein |
| BVU1968/CDS/putative                                         | 3.0   | 0.5  | 19.842 | NA | NA | hypothetical protein |
| Msm0407/CDS/P-loop                                           | 1.5   | 0.3  | 19.842 | NA | NA | hypothetical protein |
| TS28Fae03774/CDS/CDS                                         | 12.0  | 2.0  | 19.842 | NA | NA | hypothetical protein |
| Acod0503/CDS/CDS                                             | 6.0   | 1.0  | 19.842 | NA | NA | hypothetical protein |
| TS29Fae05178/CDS/CDS                                         | 6.0   | 1.0  | 19.842 | NA | NA | hypothetical protein |
| Bxyl2615/CDS/CDS                                             | 3.0   | 0.5  | 19.842 | NA | NA | hypothetical protein |
| TS29Rum20236/CDS/CDS                                         | 6.0   | 1.0  | 19.842 | NA | NA | hypothetical protein |
| TS29Fae01701/CDS/CDS                                         | 3.0   | 0.5  | 19.842 | NA | NA | hypothetical protein |
| HPAG10950/CDS/cobalt-zinc-cadmium                            | 6.0   | 1.0  | 19.842 | NA | NA | hypothetical protein |
| TS28Met1413/CDS/CDS                                          | 6.0   | 1.0  | 19.842 | NA | NA | hypothetical protein |
| TS28CorUnc036/CDS/CDS                                        | 12.0  | 2.0  | 19.842 | NA | NA | hypothetical protein |
| TS29Fae03005/CDS/CDS                                         | 12.0  | 2.0  | 19.842 | NA | NA | hypothetical protein |
| TS29Rum14148/CDS/CDS                                         | 6.0   | 1.0  | 19.842 | NA | NA | hypothetical protein |
| TS29Bac08280/CDS/CDS                                         | 6.0   | 1.0  | 19.842 | NA | NA | hypothetical protein |
| Msm1495/CDS/nuclease                                         | 1.5   | 0.3  | 19.842 | NA | NA | hypothetical protein |
| TS28Rum09358/CDS/CDS                                         | 6.0   | 1.0  | 19.842 | NA | NA | hypothetical protein |
| Bdor0720/CDS/CDS                                             | 12.0  | 2.0  | 19.842 | NA | NA | hypothetical protein |
| FpraM2120998/CDS/CDS                                         | 6.0   | 1.0  | 19.842 | NA | NA | hypothetical protein |
| Cbo10452/CDS/CDS                                             | 6.0   | 1.0  | 19.842 | NA | NA | hypothetical protein |
| Dfor3069/CDS/CDS                                             | 3.0   | 0.5  | 19.842 | NA | NA | hypothetical protein |
| b2255/CDS/fused                                              | 3.0   | 0.5  | 19.842 | NA | NA | hypothetical protein |
| Bste2553/CDS/CDS                                             | 6.0   | 1.0  | 19.842 | NA | NA | hypothetical protein |
| Bste2382/CDS/CDS                                             | 6.0   | 1.0  | 19.842 | NA | NA | hypothetical protein |
| TS28Clo06666/CDS/CDS                                         | 6.0   | 1.0  | 19.842 | NA | NA | hypothetical protein |
| Robe3907/CDS/CDS                                             | 6.0   | 1.0  | 19.842 | NA | NA | hypothetical protein |
| M23Apeg1252/CDS/ATP                                          | 6.0   | 1.0  | 19.842 | NA | NA | hypothetical protein |
| EUBREC3137/CDS/hypothetical                                  | 3.0   | 0.5  | 19.842 | NA | NA | hypothetical protein |
| Csym0962/CDS/CDS                                             | 6.0   | 1.0  | 19.842 | NA | NA | hypothetical protein |
| TS28Ali0676/CDS/CDS                                          | 6.0   | 1.0  | 19.842 | NA | NA | hypothetical protein |
| Rtor1223/CDS/CDS                                             | 12.0  | 2.0  | 19.842 | NA | NA | hypothetical protein |
| TS28Bac2015/CDS/CDS                                          | 12.0  | 2.0  | 19.842 | NA | NA | hypothetical protein |
| Pmer2421/CDS/CDS                                             | 12.0  | 2.0  | 19.842 | NA | NA | hypothetical protein |
| TS29Bac09716/CDS/CDS                                         | 6.0   | 1.0  | 19.842 | NA | NA | hypothetical protein |
| PRABACTJOHN2247/CDS/CDS                                      | 6.0   | 1.0  | 19.842 | NA | NA | hypothetical protein |
| TS28Par1404/CDS/CDS                                          | 12.0  | 2.0  | 19.842 | NA | NA | hypothetical protein |
| FpraM2121219/CDS/CDS                                         | 3.0   | 0.5  | 19.842 | NA | NA | hypothetical protein |
| TS29Rum07142/CDS/CDS                                         | 6.0   | 1.0  | 19.842 | NA | NA | hypothetical protein |
| TS29Rum01632/CDS/CDS                                         | 6.0   | 1.0  | 19.842 | NA | NA | hypothetical protein |
| TS29Fae04583/CDS/CDS                                         | 6.0   | 1.0  | 19.842 | NA | NA | hypothetical protein |
| TS28Clo08751/CDS/CDS                                         | 6.0   | 1.0  | 19.842 | NA | NA | hypothetical protein |
| TS28Fae10828/CDS/CDS                                         | 6.0   | 1.0  | 19.842 | NA | NA | hypothetical protein |
| TS29Bif3147/CDS/CDS                                          | 3.0   | 0.5  | 19.842 | NA | NA | hypothetical protein |
| TS29Rum13819/CDS/CDS                                         | 6.0   | 1.0  | 19.842 | NA | NA | hypothetical protein |
| Ceut1169/CDS/CDS                                             | 3.0   | 0.5  | 19.842 | NA | NA | hypothetical protein |
| b4160/CDS/iphosphatidylserine                                | 6.0   | 1.0  | 19.842 | NA | NA | hypothetical protein |
| b0086/CDS/UDP-N-acetylmuramoyl-tripeptide-D-alanyl-D-alanine | 6.0   | 1.0  | 19.842 | NA | NA | hypothetical protein |
| TS28Ali0590/CDS/CDS                                          | 21.0  | 3.5  | 19.842 | NA | NA | hypothetical protein |
| TS28Par0556/CDS/CDS                                          | 3.0   | 0.5  | 19.842 | NA | NA | hypothetical protein |
| TS28Clo08394/CDS/CDS                                         | 24.0  | 4.0  | 19.842 | NA | NA | hypothetical protein |
| TS29Eub1007/CDS/CDS                                          | 3.0   | 0.5  | 19.842 | NA | NA | hypothetical protein |
| TS28Ali1114/CDS/CDS                                          | 6.0   | 1.0  | 19.842 | NA | NA | hypothetical protein |
| TS28Col1469/CDS/CDS                                          | 6.0   | 1.0  | 19.842 | NA | NA | hypothetical protein |
| EUBREC3667/CDS/hypothetical                                  | 3.0   | 0.5  | 19.842 | NA | NA | hypothetical protein |
| RintL11107/CDS/CDS                                           | 12.0  | 2.0  | 19.842 | NA | NA | hypothetical protein |
| TS28Bac2480/CDS/CDS                                          | 6.0   | 1.0  | 19.842 | NA | NA | hypothetical protein |
| TS28Clo07943/CDS/CDS                                         | 6.0   | 1.0  | 19.842 | NA | NA | hypothetical protein |
| TS28Clo06123/CDS/CDS                                         | 6.0   | 1.0  | 19.842 | NA | NA | hypothetical protein |
| Bean2605/CDS/CDS                                             | 6.0   | 1.0  | 19.842 | NA | NA | hypothetical protein |
| Dfor1979/CDS/CDS                                             | 3.0   | 0.5  | 19.842 | NA | NA | hypothetical protein |
| Eef10695/CDS/CDS                                             | 3.0   | 0.5  | 19.842 | NA | NA | hypothetical protein |
| Robe0993/CDS/CDS                                             | 3.0   | 0.5  | 19.842 | NA | NA | hypothetical protein |
| TS28Fae01319/CDS/CDS                                         | 6.0   | 1.0  | 19.842 | NA | NA | hypothetical protein |
| FpraM2120692/CDS/CDS                                         | 3.0   | 0.5  | 19.842 | NA | NA | hypothetical protein |
| Char0635/CDS/CDS                                             | 6.0   | 1.0  | 19.842 | NA | NA | hypothetical protein |
| BVU0322/CDS/hypothetical                                     | 3.0   | 0.5  | 19.842 | NA | NA | hypothetical protein |
| Bdor0848/CDS/CDS                                             | 6.0   | 1.0  | 19.842 | NA | NA | hypothetical protein |
| HPAG11022/CDS/biotin                                         | 6.0   | 1.0  | 19.842 | NA | NA | hypothetical protein |
| TS29Clo4878/CDS/CDS                                          | 3.0   | 0.5  | 19.842 | NA | NA | hypothetical protein |
| Cbar2670/CDS/CDS                                             | 12.0  | 2.0  | 19.842 | NA | NA | hypothetical protein |
| TS28Clo02092/CDS/CDS                                         | 6.0   | 1.0  | 19.842 | NA | NA | hypothetical protein |
| Pmer0371/CDS/CDS                                             | 6.0   | 1.0  | 19.842 | NA | NA | hypothetical protein |
| TS28Clo08322/CDS/CDS                                         | 54.0  | 9.0  | 19.842 | NA | NA | hypothetical protein |
| TS29Fae08351/CDS/CDS                                         | 3.0   | 0.5  | 19.842 | NA | NA | hypothetical protein |
| Bthe3733475/CDS/CDS                                          | 6.0   | 1.0  | 19.842 | NA | NA | hypothetical protein |
| BFych462832/CDS/hypothetical                                 | 6.0   | 1.0  | 19.842 | NA | NA | hypothetical protein |
| Bdor1198/CDS/CDS                                             | 6.0   | 1.0  | 19.842 | NA | NA | hypothetical protein |
| Bdor1594/CDS/CDS                                             | 39.7  | 6.7  | 19.676 | NA | NA | hypothetical protein |
| Msm0219/CDS/putative                                         | 7.9   | 1.3  | 19.635 | NA | NA | hypothetical protein |
| TS28RumUnc2041/CDS/CDS                                       | 65.0  | 11.0 | 19.541 | NA | NA | hypothetical protein |
| Bdor3155/CDS/CDS                                             | 62.0  | 10.5 | 19.527 | NA | NA | hypothetical protein |
| TS28Ali1423/CDS/CDS                                          | 106.0 | 18.0 | 19.474 | NA | NA | hypothetical protein |
| Msmi750871/CDS/CDS                                           | 9.7   | 1.7  | 19.312 | NA | NA | hypothetical protein |
| BVU0763/CDS/putative                                         | 70.0  | 12.0 | 19.290 | NA | NA | hypothetical protein |
| TS28Ali1427/CDS/CDS                                          | 35.0  | 6.0  | 19.290 | NA | NA | hypothetical protein |
| BVU3585/CDS/glyceraldehdvde                                  | 34.9  | 6.0  | 19.245 | NA | NA | hypothetical protein |
| TS28Clo10250/CDS/CDS                                         | 157.0 | 27.0 | 19.229 | NA | NA | hypothetical protein |

|                                |       |      |        |    |    |                      |
|--------------------------------|-------|------|--------|----|----|----------------------|
| TS28Bac2231 CDS CDS            | 23.3  | 4.0  | 19.222 | NA | NA | hypothetical protein |
| Bconrac0082 CDS CDS            | 1.9   | 0.3  | 19.180 | NA | NA | hypothetical protein |
| Bple1063 CDS CDS               | 1.9   | 0.3  | 19.180 | NA | NA | hypothetical protein |
| Msm1377 CDS S0S                | 14.5  | 2.5  | 19.180 | NA | NA | hypothetical protein |
| Msm1001 CDS methvl             | 18.8  | 3.3  | 19.163 | NA | NA | hypothetical protein |
| BactD10315 CDS CDS             | 1.9   | 0.3  | 19.133 | NA | NA | hypothetical protein |
| Rena2454 CDS CDS               | 155.8 | 27.0 | 19.086 | NA | NA | hypothetical protein |
| BVU1488 CDS RNA                | 121.2 | 21.0 | 19.080 | NA | NA | hypothetical protein |
| Pmer0317 CDS CDS               | 49.0  | 8.5  | 19.063 | NA | NA | hypothetical protein |
| BVU0801 CDS S0S                | 46.0  | 8.0  | 19.015 | NA | NA | hypothetical protein |
| BT1920 CDS hypothetical        | 11.5  | 2.0  | 19.015 | NA | NA | hypothetical protein |
| TS28Ali1050 CDS CDS            | 46.0  | 8.0  | 19.015 | NA | NA | hypothetical protein |
| Msm0969 CDS predicted          | 5.8   | 1.0  | 19.015 | NA | NA | hypothetical protein |
| Msm0870 CDS molecular          | 14.4  | 2.5  | 18.982 | NA | NA | hypothetical protein |
| Buni0615 CDS CDS               | 11.5  | 2.0  | 18.956 | NA | NA | hypothetical protein |
| TS28Ali1173 CDS CDS            | 20.0  | 3.5  | 18.897 | NA | NA | hypothetical protein |
| TS29Fae01548 CDS CDS           | 20.0  | 3.5  | 18.897 | NA | NA | hypothetical protein |
| Msm1160 CDS nitrogenase        | 5.9   | 1.0  | 18.882 | NA | NA | hypothetical protein |
| Msm0729 CDS molybdopterin      | 2.9   | 0.5  | 18.850 | NA | NA | hypothetical protein |
| BVU14086 CDS hypothetical      | 45.5  | 8.0  | 18.808 | NA | NA | hypothetical protein |
| TS28Bac7924 CDS CDS            | 2.8   | 0.5  | 18.739 | NA | NA | hypothetical protein |
| b3533 CDS cellulose            | 5.7   | 1.0  | 18.739 | NA | NA | hypothetical protein |
| Buni0612 CDS CDS               | 5.7   | 1.0  | 18.739 | NA | NA | hypothetical protein |
| TS28Clo06726 CDS CDS           | 17.0  | 3.0  | 18.739 | NA | NA | hypothetical protein |
| TS29Bac10948 CDS CDS           | 8.5   | 1.5  | 18.739 | NA | NA | hypothetical protein |
| TS28Fae03818 CDS CDS           | 17.0  | 3.0  | 18.739 | NA | NA | hypothetical protein |
| TS28Fae03118 CDS CDS           | 17.0  | 3.0  | 18.739 | NA | NA | hypothetical protein |
| L129481 CDS hypothetical       | 5.7   | 1.0  | 18.739 | NA | NA | hypothetical protein |
| Bova1588 CDS CDS               | 2.8   | 0.5  | 18.739 | NA | NA | hypothetical protein |
| BVU14056 CDS hypothetical      | 2.8   | 0.5  | 18.739 | NA | NA | hypothetical protein |
| BactD10771 CDS CDS             | 2.8   | 0.5  | 18.739 | NA | NA | hypothetical protein |
| BVU0826 CDS tyrosine           | 141.5 | 25.0 | 18.717 | NA | NA | hypothetical protein |
| Bfych462831 CDS hypothetical   | 6.6   | 1.2  | 18.708 | NA | NA | hypothetical protein |
| BVU1945 CDS hypothetical       | 50.8  | 9.0  | 18.647 | NA | NA | hypothetical protein |
| TS28Bac8247 CDS CDS            | 62.0  | 11.0 | 18.639 | NA | NA | hypothetical protein |
| Bste2614 CDS CDS               | 22.5  | 4.0  | 18.602 | NA | NA | hypothetical protein |
| BVU1354 CDS transcription      | 44.8  | 8.0  | 18.531 | NA | NA | hypothetical protein |
| BVU2904 CDS putative           | 4.7   | 0.8  | 18.519 | NA | NA | hypothetical protein |
| BactD11817 CDS CDS             | 2.8   | 0.5  | 18.519 | NA | NA | hypothetical protein |
| Msm1474 CDS chorismate         | 2.8   | 0.5  | 18.519 | NA | NA | hypothetical protein |
| TS29Bac04870 CDS CDS           | 2.8   | 0.5  | 18.519 | NA | NA | hypothetical protein |
| TS28Fae06890 CDS CDS           | 28.0  | 5.0  | 18.519 | NA | NA | hypothetical protein |
| BLD0102 CDS Membrane           | 9.5   | 1.7  | 18.480 | NA | NA | hypothetical protein |
| BVU3301 CDS putative           | 243.5 | 44.0 | 18.301 | NA | NA | hypothetical protein |
| BVU1109 CDS dihydrofolinoamide | 13.8  | 2.5  | 18.298 | NA | NA | hypothetical protein |
| TS28Clo02077 CDS CDS           | 116.0 | 21.0 | 18.267 | NA | NA | hypothetical protein |
| Msm1751652 CDS CDS             | 3.7   | 0.7  | 18.188 | NA | NA | hypothetical protein |
| Msm1740158 CDS CDS             | 3.7   | 0.7  | 18.188 | NA | NA | hypothetical protein |
| TS28Met0053 CDS CDS            | 3.7   | 0.7  | 18.188 | NA | NA | hypothetical protein |
| Msm1751006 CDS CDS             | 3.7   | 0.7  | 18.188 | NA | NA | hypothetical protein |
| BVU0795 CDS S0S                | 27.5  | 5.0  | 18.188 | NA | NA | hypothetical protein |
| TS28Dor1751 CDS CDS            | 11.0  | 2.0  | 18.188 | NA | NA | hypothetical protein |
| Dlon0756 CDS CDS               | 11.0  | 2.0  | 18.188 | NA | NA | hypothetical protein |
| TS28Fae18480 CDS CDS           | 11.0  | 2.0  | 18.188 | NA | NA | hypothetical protein |
| TS29Bac00254 CDS CDS           | 11.0  | 2.0  | 18.188 | NA | NA | hypothetical protein |
| TS29Fae03223 CDS CDS           | 5.5   | 1.0  | 18.188 | NA | NA | hypothetical protein |
| Bfych462824 CDS putative       | 2.8   | 0.5  | 18.188 | NA | NA | hypothetical protein |
| Msm1729 CDS hypothetical       | 2.8   | 0.5  | 18.188 | NA | NA | hypothetical protein |
| TS29Fae06323 CDS CDS           | 5.5   | 1.0  | 18.188 | NA | NA | hypothetical protein |
| HPAG10438 CDS type             | 11.0  | 2.0  | 18.188 | NA | NA | hypothetical protein |
| Pmer0472 CDS CDS               | 11.0  | 2.0  | 18.188 | NA | NA | hypothetical protein |
| TS28Rum07101 CDS CDS           | 11.0  | 2.0  | 18.188 | NA | NA | hypothetical protein |
| Bdor3766 CDS CDS               | 11.0  | 2.0  | 18.188 | NA | NA | hypothetical protein |
| Msm1750111 CDS CDS             | 2.8   | 0.5  | 18.188 | NA | NA | hypothetical protein |
| TS28Fae01301 CDS CDS           | 5.5   | 1.0  | 18.188 | NA | NA | hypothetical protein |
| Msm0257 CDS hypothetical       | 2.8   | 0.5  | 18.188 | NA | NA | hypothetical protein |
| Bste2641 CDS CDS               | 5.5   | 1.0  | 18.188 | NA | NA | hypothetical protein |
| Bste1053 CDS CDS               | 11.0  | 2.0  | 18.188 | NA | NA | hypothetical protein |
| Eeli0873 CDS CDS               | 11.0  | 2.0  | 18.188 | NA | NA | hypothetical protein |
| TS28Clo08418 CDS CDS           | 11.0  | 2.0  | 18.188 | NA | NA | hypothetical protein |
| TS28Ali2279 CDS CDS            | 11.0  | 2.0  | 18.188 | NA | NA | hypothetical protein |
| Bova1767 CDS CDS               | 5.5   | 1.0  | 18.188 | NA | NA | hypothetical protein |
| TS29Fae07796 CDS CDS           | 5.5   | 1.0  | 18.188 | NA | NA | hypothetical protein |
| TS29Fae04746 CDS CDS           | 5.5   | 1.0  | 18.188 | NA | NA | hypothetical protein |
| TS29Fae09428 CDS CDS           | 11.0  | 2.0  | 18.188 | NA | NA | hypothetical protein |
| HPAG11502 CDS ATP-dependent    | 11.0  | 2.0  | 18.188 | NA | NA | hypothetical protein |
| Pmer0107 CDS CDS               | 11.0  | 2.0  | 18.188 | NA | NA | hypothetical protein |
| Cspl21861 CDS CDS              | 5.5   | 1.0  | 18.188 | NA | NA | hypothetical protein |
| TS29Bac11605 CDS CDS           | 11.0  | 2.0  | 18.188 | NA | NA | hypothetical protein |
| TS29Bac05017 CDS CDS           | 5.5   | 1.0  | 18.188 | NA | NA | hypothetical protein |
| b2113 CDS antiporter           | 5.5   | 1.0  | 18.188 | NA | NA | hypothetical protein |
| b1493 CDS glutamate            | 5.5   | 1.0  | 18.188 | NA | NA | hypothetical protein |
| TS28Clo0177 CDS CDS            | 11.0  | 2.0  | 18.188 | NA | NA | hypothetical protein |
| TS28Rum02101 CDS CDS           | 5.5   | 1.0  | 18.188 | NA | NA | hypothetical protein |
| TS28Clo07103 CDS CDS           | 11.0  | 2.0  | 18.188 | NA | NA | hypothetical protein |
| TS29Bac10785 CDS CDS           | 5.5   | 1.0  | 18.188 | NA | NA | hypothetical protein |
| HPAG10636 CDS alpha            | 5.5   | 1.0  | 18.188 | NA | NA | hypothetical protein |
| TS28Fae01305 CDS CDS           | 22.0  | 4.0  | 18.188 | NA | NA | hypothetical protein |
| BVU0191 CDS ROK                | 33.0  | 6.0  | 18.188 | NA | NA | hypothetical protein |
| TS28Ali1012 CDS CDS            | 181.0 | 33.0 | 18.138 | NA | NA | hypothetical protein |
| Msm0424 CDS transcription      | 8.7   | 1.6  | 18.136 | NA | NA | hypothetical protein |
| TS28Rum08672 CDS CDS           | 52.0  | 9.5  | 18.101 | NA | NA | hypothetical protein |

|                                               |       |      |        |    |    |                      |
|-----------------------------------------------|-------|------|--------|----|----|----------------------|
| BVU2080 CDS hypothetical                      | 65.5  | 12.0 | 18.050 | NA | NA | hypothetical protein |
| Bint0742 CDS CDS                              | 1.1   | 0.2  | 18.038 | NA | NA | hypothetical protein |
| Bdor1465 CDS CDS                              | 1.1   | 0.2  | 18.038 | NA | NA | hypothetical protein |
| Pmer0670 CDS CDS                              | 1.1   | 0.2  | 18.038 | NA | NA | hypothetical protein |
| TS28Bac7061 CDS CDS                           | 38.2  | 7.0  | 18.031 | NA | NA | hypothetical protein |
| BVU3614 CDS hypothetical                      | 38.2  | 7.0  | 18.031 | NA | NA | hypothetical protein |
| BVU3584 CDS tRNA                              | 10.8  | 2.0  | 17.913 | NA | NA | hypothetical protein |
| TS28Ali1246 CDS CDS                           | 92.0  | 17.0 | 17.896 | NA | NA | hypothetical protein |
| TS28Met1117 CDS CDS                           | 9.0   | 1.7  | 17.857 | NA | NA | hypothetical protein |
| TS28Clo05901 CDS CDS                          | 27.0  | 5.0  | 17.857 | NA | NA | hypothetical protein |
| TS28Bac8240 CDS CDS                           | 81.0  | 15.0 | 17.857 | NA | NA | hypothetical protein |
| TS29Bac11276 CDS CDS                          | 13.5  | 2.5  | 17.857 | NA | NA | hypothetical protein |
| TS28Ali0654 CDS CDS                           | 151.0 | 28.0 | 17.834 | NA | NA | hypothetical protein |
| TS28Ali1847 CDS CDS                           | 248.0 | 46.0 | 17.829 | NA | NA | hypothetical protein |
| TS28Ali0436 CDS CDS                           | 167.0 | 31.0 | 17.815 | NA | NA | hypothetical protein |
| Bum0657 CDS CDS                               | 58.8  | 11.0 | 17.687 | NA | NA | hypothetical protein |
| TS28Ali0680 CDS CDS                           | 181.5 | 34.0 | 17.653 | NA | NA | hypothetical protein |
| Bxv12128 CDS CDS                              | 2.7   | 0.5  | 17.637 | NA | NA | hypothetical protein |
| TS28Rum02142 CDS CDS                          | 16.0  | 3.0  | 17.637 | NA | NA | hypothetical protein |
| TS28Ali0149 CDS CDS                           | 32.0  | 6.0  | 17.637 | NA | NA | hypothetical protein |
| BL1181 CDS hypothetical                       | 4.0   | 0.8  | 17.637 | NA | NA | hypothetical protein |
| Pmer0471 CDS CDS                              | 16.0  | 3.0  | 17.637 | NA | NA | hypothetical protein |
| TS29Rum12028 CDS CDS                          | 16.0  | 3.0  | 17.637 | NA | NA | hypothetical protein |
| TS28Clo02039 CDS CDS                          | 32.0  | 6.0  | 17.637 | NA | NA | hypothetical protein |
| TS28Fae07973 CDS CDS                          | 16.0  | 3.0  | 17.637 | NA | NA | hypothetical protein |
| TS28Par0638 CDS CDS                           | 8.0   | 1.5  | 17.637 | NA | NA | hypothetical protein |
| Pmer1161 CDS CDS                              | 16.0  | 3.0  | 17.637 | NA | NA | hypothetical protein |
| TS28Eub5571 CDS CDS                           | 2.7   | 0.5  | 17.637 | NA | NA | hypothetical protein |
| TS28Clo02082 CDS CDS                          | 16.0  | 3.0  | 17.637 | NA | NA | hypothetical protein |
| Rtor0319 CDS CDS                              | 16.0  | 3.0  | 17.637 | NA | NA | hypothetical protein |
| Bova3371 CDS CDS                              | 2.7   | 0.5  | 17.637 | NA | NA | hypothetical protein |
| Msm1695 CDS excinuclease                      | 1.3   | 0.3  | 17.637 | NA | NA | hypothetical protein |
| BVU3511 CDS putative                          | 2.4   | 0.5  | 17.622 | NA | NA | hypothetical protein |
| BacD11029 CDS CDS                             | 20.3  | 3.8  | 17.541 | NA | NA | hypothetical protein |
| TS28Fae12311 CDS CDS                          | 37.0  | 7.0  | 17.480 | NA | NA | hypothetical protein |
| BVU0803 CDS S0S                               | 52.6  | 10.0 | 17.391 | NA | NA | hypothetical protein |
| TS28Ali0950 CDS CDS                           | 268.0 | 51.0 | 17.378 | NA | NA | hypothetical protein |
| Msm0652 CDS pyruvate                          | 1.8   | 0.3  | 17.361 | NA | NA | hypothetical protein |
| TS29Rum21191 CDS CDS                          | 21.0  | 4.0  | 17.361 | NA | NA | hypothetical protein |
| Bdor1384 CDS CDS                              | 10.5  | 2.0  | 17.361 | NA | NA | hypothetical protein |
| Msm0821 CDS orotate                           | 3.5   | 0.7  | 17.361 | NA | NA | hypothetical protein |
| TS28Ali0055 CDS CDS                           | 26.0  | 5.0  | 17.196 | NA | NA | hypothetical protein |
| Bste2573 CDS CDS                              | 26.0  | 5.0  | 17.196 | NA | NA | hypothetical protein |
| Bste3065 CDS CDS                              | 26.0  | 5.0  | 17.196 | NA | NA | hypothetical protein |
| TS28Clo02071 CDS CDS                          | 26.0  | 5.0  | 17.196 | NA | NA | hypothetical protein |
| BT4012 CDS putative                           | 17.3  | 3.3  | 17.196 | NA | NA | hypothetical protein |
| BVU2337 CDS hypothetical                      | 10.3  | 2.0  | 17.086 | NA | NA | hypothetical protein |
| Bdor2769 CDS CDS                              | 10.3  | 2.0  | 17.086 | NA | NA | hypothetical protein |
| BFvch462834 CDS hypothetical                  | 6.0   | 1.2  | 17.007 | NA | NA | hypothetical protein |
| Bthe3733477 CDS CDS                           | 6.0   | 1.2  | 17.007 | NA | NA | hypothetical protein |
| BVU2573 CDS hypothetical                      | 13.7  | 2.7  | 16.948 | NA | NA | hypothetical protein |
| TS28Fae22740 CDS CDS                          | 20.5  | 4.0  | 16.948 | NA | NA | hypothetical protein |
| TS28Bac2397 CDS CDS                           | 7.7   | 1.5  | 16.902 | NA | NA | hypothetical protein |
| TS28Ali1675 CDS CDS                           | 153.0 | 30.0 | 16.865 | NA | NA | hypothetical protein |
| TS28Ali0116 CDS CDS                           | 28.0  | 5.5  | 16.835 | NA | NA | hypothetical protein |
| Msm0273 CDS 3-phosphoshikimate                | 6.8   | 1.3  | 16.824 | NA | NA | hypothetical protein |
| BVU2964 CDS hypothetical                      | 33.0  | 6.5  | 16.789 | NA | NA | hypothetical protein |
| Bdor0464 CDS CDS                              | 15.2  | 3.0  | 16.718 | NA | NA | hypothetical protein |
| TS28Fae15749 CDS CDS                          | 96.0  | 19.0 | 16.709 | NA | NA | hypothetical protein |
| TS28Fae05414 CDS CDS                          | 111.0 | 22.0 | 16.685 | NA | NA | hypothetical protein |
| Msm0981 CDS hypothetical                      | 8.4   | 1.7  | 16.667 | NA | NA | hypothetical protein |
| Bdor2812 CDS CDS                              | 55.2  | 11.0 | 16.585 | NA | NA | hypothetical protein |
| BVU0798 CDS S0S                               | 57.6  | 11.5 | 16.576 | NA | NA | hypothetical protein |
| BacD13746 CDS CDS                             | 1.7   | 0.3  | 16.535 | NA | NA | hypothetical protein |
| TS28Par2502 CDS CDS                           | 1.7   | 0.3  | 16.535 | NA | NA | hypothetical protein |
| PRABACTJOHN3202 CDS CDS                       | 1.7   | 0.3  | 16.535 | NA | NA | hypothetical protein |
| BDI2136 CDS hypothetical                      | 1.7   | 0.3  | 16.535 | NA | NA | hypothetical protein |
| Bxv11816 CDS CDS                              | 1.7   | 0.3  | 16.535 | NA | NA | hypothetical protein |
| TS29Rum11723 CDS CDS                          | 2.5   | 0.5  | 16.535 | NA | NA | hypothetical protein |
| TS28Eub5700 CDS CDS                           | 2.5   | 0.5  | 16.535 | NA | NA | hypothetical protein |
| TS29Bac00382 CDS CDS                          | 1.7   | 0.3  | 16.535 | NA | NA | hypothetical protein |
| BVU2311 CDS ketoisovalerate                   | 5.0   | 1.0  | 16.535 | NA | NA | hypothetical protein |
| TS28Dor0410 CDS CDS                           | 7.5   | 1.5  | 16.535 | NA | NA | hypothetical protein |
| TS28Bac5058 CDS CDS                           | 15.0  | 3.0  | 16.535 | NA | NA | hypothetical protein |
| Bova2231 CDS CDS                              | 30.0  | 6.0  | 16.535 | NA | NA | hypothetical protein |
| TS29Rum20344 CDS CDS                          | 7.5   | 1.5  | 16.535 | NA | NA | hypothetical protein |
| Msm0814 CDS phosphoribosylformylglycinamidine | 3.3   | 0.7  | 16.535 | NA | NA | hypothetical protein |
| TS29Bac02021 CDS CDS                          | 3.3   | 0.7  | 16.535 | NA | NA | hypothetical protein |
| TS28ErvUnc38 CDS CDS                          | 15.0  | 3.0  | 16.535 | NA | NA | hypothetical protein |
| TS28Par1049 CDS CDS                           | 15.0  | 3.0  | 16.535 | NA | NA | hypothetical protein |
| TS28Fae04140 CDS CDS                          | 30.0  | 6.0  | 16.535 | NA | NA | hypothetical protein |
| Eeli0600 CDS CDS                              | 15.0  | 3.0  | 16.535 | NA | NA | hypothetical protein |
| Dlon2094 CDS CDS                              | 7.5   | 1.5  | 16.535 | NA | NA | hypothetical protein |
| BVU4106 CDS hypothetical                      | 2.5   | 0.5  | 16.535 | NA | NA | hypothetical protein |
| TS28Eub1849 CDS CDS                           | 5.0   | 1.0  | 16.535 | NA | NA | hypothetical protein |
| RintL10526 CDS CDS                            | 5.0   | 1.0  | 16.535 | NA | NA | hypothetical protein |
| M23Apez361 CDS hypothetical                   | 5.0   | 1.0  | 16.535 | NA | NA | hypothetical protein |
| Beat0773 CDS CDS                              | 5.0   | 1.0  | 16.535 | NA | NA | hypothetical protein |
| Ehal2078 CDS CDS                              | 2.5   | 0.5  | 16.535 | NA | NA | hypothetical protein |
| TS29Bac00340 CDS CDS                          | 5.0   | 1.0  | 16.535 | NA | NA | hypothetical protein |
| TS28Fae07933 CDS CDS                          | 10.0  | 2.0  | 16.535 | NA | NA | hypothetical protein |

|                                   |      |     |        |    |    |                      |
|-----------------------------------|------|-----|--------|----|----|----------------------|
| TS29Rum06488 CDS CDS              | 5.0  | 1.0 | 16.535 | NA | NA | hypothetical protein |
| TS28RumUnc1298 CDS CDS            | 10.0 | 2.0 | 16.535 | NA | NA | hypothetical protein |
| b4021 CDS (alpha)-aspartyl        | 5.0  | 1.0 | 16.535 | NA | NA | hypothetical protein |
| b0356 CDS alcohol                 | 5.0  | 1.0 | 16.535 | NA | NA | hypothetical protein |
| BL1735 CDS hypothetical           | 1.3  | 0.3 | 16.535 | NA | NA | hypothetical protein |
| EFER0010 CDS chaperone            | 5.0  | 1.0 | 16.535 | NA | NA | hypothetical protein |
| HPAG11238 CDS DNA-directed        | 5.0  | 1.0 | 16.535 | NA | NA | hypothetical protein |
| Cbo13622 CDS CDS                  | 5.0  | 1.0 | 16.535 | NA | NA | hypothetical protein |
| TS29Clo2174 CDS CDS               | 5.0  | 1.0 | 16.535 | NA | NA | hypothetical protein |
| Cspi0219 CDS CDS                  | 10.0 | 2.0 | 16.535 | NA | NA | hypothetical protein |
| TS29Fae00685 CDS CDS              | 5.0  | 1.0 | 16.535 | NA | NA | hypothetical protein |
| TS28Fae07785 CDS CDS              | 5.0  | 1.0 | 16.535 | NA | NA | hypothetical protein |
| HPAG11191 CDS 3'-5'               | 5.0  | 1.0 | 16.535 | NA | NA | hypothetical protein |
| BL1571 CDS 50S                    | 1.3  | 0.3 | 16.535 | NA | NA | hypothetical protein |
| Casp4857 CDS CDS                  | 5.0  | 1.0 | 16.535 | NA | NA | hypothetical protein |
| TS28Bac3906 CDS CDS               | 2.5  | 0.5 | 16.535 | NA | NA | hypothetical protein |
| Brvfor2144 CDS CDS                | 5.0  | 1.0 | 16.535 | NA | NA | hypothetical protein |
| HPAG10326 CDS membrane            | 5.0  | 1.0 | 16.535 | NA | NA | hypothetical protein |
| Cbo14929 CDS CDS                  | 2.5  | 0.5 | 16.535 | NA | NA | hypothetical protein |
| Pmer1192 CDS CDS                  | 5.0  | 1.0 | 16.535 | NA | NA | hypothetical protein |
| TS28RumUnc0399 CDS CDS            | 5.0  | 1.0 | 16.535 | NA | NA | hypothetical protein |
| HPAG10728 CDS hypothetical        | 5.0  | 1.0 | 16.535 | NA | NA | hypothetical protein |
| Cmet0699 CDS CDS                  | 5.0  | 1.0 | 16.535 | NA | NA | hypothetical protein |
| TS28Bac5925 CDS CDS               | 5.0  | 1.0 | 16.535 | NA | NA | hypothetical protein |
| Rtor0331 CDS CDS                  | 2.5  | 0.5 | 16.535 | NA | NA | hypothetical protein |
| Bbre1162 CDS CDS                  | 5.0  | 1.0 | 16.535 | NA | NA | hypothetical protein |
| TS28Bac5221 CDS CDS               | 10.0 | 2.0 | 16.535 | NA | NA | hypothetical protein |
| HPAG10442 CDS hypothetical        | 5.0  | 1.0 | 16.535 | NA | NA | hypothetical protein |
| Msm1539 CDS sialic                | 1.3  | 0.3 | 16.535 | NA | NA | hypothetical protein |
| TS28Fae11611 CDS CDS              | 5.0  | 1.0 | 16.535 | NA | NA | hypothetical protein |
| TS28Ali0229 CDS CDS               | 5.0  | 1.0 | 16.535 | NA | NA | hypothetical protein |
| TS28Par2312 CDS CDS               | 5.0  | 1.0 | 16.535 | NA | NA | hypothetical protein |
| TS28Bif0372 CDS CDS               | 5.0  | 1.0 | 16.535 | NA | NA | hypothetical protein |
| TS29Bif2567 CDS CDS               | 5.0  | 1.0 | 16.535 | NA | NA | hypothetical protein |
| TS28Clo03997 CDS CDS              | 10.0 | 2.0 | 16.535 | NA | NA | hypothetical protein |
| TS29Rum15434 CDS CDS              | 5.0  | 1.0 | 16.535 | NA | NA | hypothetical protein |
| Cbo16475 CDS CDS                  | 2.5  | 0.5 | 16.535 | NA | NA | hypothetical protein |
| b3426 CDS sn-glycerol-3-phosphate | 5.0  | 1.0 | 16.535 | NA | NA | hypothetical protein |
| TS29Fae08067 CDS CDS              | 10.0 | 2.0 | 16.535 | NA | NA | hypothetical protein |
| Csvm3648 CDS CDS                  | 5.0  | 1.0 | 16.535 | NA | NA | hypothetical protein |
| Msm1499 CDS predicted             | 2.5  | 0.5 | 16.535 | NA | NA | hypothetical protein |
| RintL11285 CDS CDS                | 5.0  | 1.0 | 16.535 | NA | NA | hypothetical protein |
| TS29Rum03540 CDS CDS              | 2.5  | 0.5 | 16.535 | NA | NA | hypothetical protein |
| TS29Rum19980 CDS CDS              | 17.5 | 3.5 | 16.535 | NA | NA | hypothetical protein |
| TS28Clo05011 CDS CDS              | 10.0 | 2.0 | 16.535 | NA | NA | hypothetical protein |
| TS28Rum13181 CDS CDS              | 5.0  | 1.0 | 16.535 | NA | NA | hypothetical protein |
| Cbar1101 CDS CDS                  | 10.0 | 2.0 | 16.535 | NA | NA | hypothetical protein |
| TS28Fae14138 CDS CDS              | 5.0  | 1.0 | 16.535 | NA | NA | hypothetical protein |
| Svar1806 CDS CDS                  | 5.0  | 1.0 | 16.535 | NA | NA | hypothetical protein |
| TS29Fae00075 CDS CDS              | 5.0  | 1.0 | 16.535 | NA | NA | hypothetical protein |
| b2985 CDS predicted               | 5.0  | 1.0 | 16.535 | NA | NA | hypothetical protein |
| RintL13438 CDS CDS                | 5.0  | 1.0 | 16.535 | NA | NA | hypothetical protein |
| Bdor0105 CDS CDS                  | 10.0 | 2.0 | 16.535 | NA | NA | hypothetical protein |
| HPAG10505 CDS cag                 | 5.0  | 1.0 | 16.535 | NA | NA | hypothetical protein |
| TS29Fae05896 CDS CDS              | 2.5  | 0.5 | 16.535 | NA | NA | hypothetical protein |
| TS28Bac0025 CDS CDS               | 5.0  | 1.0 | 16.535 | NA | NA | hypothetical protein |
| HPAG10297 CDS flagellar           | 10.0 | 2.0 | 16.535 | NA | NA | hypothetical protein |
| b3465 CDS predicted               | 5.0  | 1.0 | 16.535 | NA | NA | hypothetical protein |
| Bste1906 CDS CDS                  | 5.0  | 1.0 | 16.535 | NA | NA | hypothetical protein |
| BLD0256 CDS ABC-type              | 5.0  | 1.0 | 16.535 | NA | NA | hypothetical protein |
| b3807 CDS ifritaxin               | 5.0  | 1.0 | 16.535 | NA | NA | hypothetical protein |
| RintL11580 CDS CDS                | 5.0  | 1.0 | 16.535 | NA | NA | hypothetical protein |
| HPAG10518 CDS cag                 | 5.0  | 1.0 | 16.535 | NA | NA | hypothetical protein |
| b2895 CDS flavodoxin              | 5.0  | 1.0 | 16.535 | NA | NA | hypothetical protein |
| TS29Bac11661 CDS CDS              | 5.0  | 1.0 | 16.535 | NA | NA | hypothetical protein |
| Bdor3519 CDS CDS                  | 10.0 | 2.0 | 16.535 | NA | NA | hypothetical protein |
| TS29Fae09972 CDS CDS              | 2.5  | 0.5 | 16.535 | NA | NA | hypothetical protein |
| CspL20959 CDS CDS                 | 5.0  | 1.0 | 16.535 | NA | NA | hypothetical protein |
| Cbar0701 CDS CDS                  | 5.0  | 1.0 | 16.535 | NA | NA | hypothetical protein |
| Eeli1332 CDS CDS                  | 5.0  | 1.0 | 16.535 | NA | NA | hypothetical protein |
| HPAG10344 CDS CTP                 | 5.0  | 1.0 | 16.535 | NA | NA | hypothetical protein |
| b0560 CDS DLP12                   | 5.0  | 1.0 | 16.535 | NA | NA | hypothetical protein |
| Ccom1706 CDS CDS                  | 5.0  | 1.0 | 16.535 | NA | NA | hypothetical protein |
| FpraM2120500 CDS CDS              | 5.0  | 1.0 | 16.535 | NA | NA | hypothetical protein |
| CspSS20532 CDS CDS                | 5.0  | 1.0 | 16.535 | NA | NA | hypothetical protein |
| Acol0421 CDS CDS                  | 5.0  | 1.0 | 16.535 | NA | NA | hypothetical protein |
| RintL10311 CDS CDS                | 5.0  | 1.0 | 16.535 | NA | NA | hypothetical protein |
| FpraM2121640 CDS CDS              | 10.0 | 2.0 | 16.535 | NA | NA | hypothetical protein |
| TS28Bac4467 CDS CDS               | 5.0  | 1.0 | 16.535 | NA | NA | hypothetical protein |
| TS28Fae03802 CDS CDS              | 5.0  | 1.0 | 16.535 | NA | NA | hypothetical protein |
| Hfli3398 CDS CDS                  | 5.0  | 1.0 | 16.535 | NA | NA | hypothetical protein |
| TS28Par1419 CDS CDS               | 2.5  | 0.5 | 16.535 | NA | NA | hypothetical protein |
| TS29Fae04635 CDS CDS              | 2.5  | 0.5 | 16.535 | NA | NA | hypothetical protein |
| TS28Met0229 CDS CDS               | 5.0  | 1.0 | 16.535 | NA | NA | hypothetical protein |
| TS28Bac1039 CDS CDS               | 5.0  | 1.0 | 16.535 | NA | NA | hypothetical protein |
| Rlac0751 CDS CDS                  | 5.0  | 1.0 | 16.535 | NA | NA | hypothetical protein |
| TS28Bac2039 CDS CDS               | 5.0  | 1.0 | 16.535 | NA | NA | hypothetical protein |
| TS29Rum12358 CDS CDS              | 5.0  | 1.0 | 16.535 | NA | NA | hypothetical protein |
| TS28Clo07275 CDS CDS              | 10.0 | 2.0 | 16.535 | NA | NA | hypothetical protein |
| Aput0794 CDS CDS                  | 5.0  | 1.0 | 16.535 | NA | NA | hypothetical protein |
| BLD1913 CDS Hypothetical          | 1.3  | 0.3 | 16.535 | NA | NA | hypothetical protein |
| BactD12275 CDS CDS                | 2.5  | 0.5 | 16.535 | NA | NA | hypothetical protein |

|                                             |       |      |        |    |    |                      |
|---------------------------------------------|-------|------|--------|----|----|----------------------|
| Msmi741458/CDS/CDS                          | 5.0   | 1.0  | 16.535 | NA | NA | hypothetical protein |
| TS28Eub3595/CDS/CDS                         | 5.0   | 1.0  | 16.535 | NA | NA | hypothetical protein |
| TS28Col1389/CDS/CDS                         | 5.0   | 1.0  | 16.535 | NA | NA | hypothetical protein |
| TS29Bac05372/CDS/CDS                        | 5.0   | 1.0  | 16.535 | NA | NA | hypothetical protein |
| TS29Cio0774/CDS/CDS                         | 5.0   | 1.0  | 16.535 | NA | NA | hypothetical protein |
| TS28Fae00850/CDS/CDS                        | 1.7   | 0.3  | 16.535 | NA | NA | hypothetical protein |
| TS28Fae17537/CDS/CDS                        | 74.0  | 15.0 | 16.314 | NA | NA | hypothetical protein |
| Msmi741304/CDS/CDS                          | 5.8   | 1.2  | 16.298 | NA | NA | hypothetical protein |
| TS28Met0294/CDS/CDS                         | 7.3   | 1.5  | 16.167 | NA | NA | hypothetical protein |
| Msm0377/CDS[2-C-methyl-D-erythritol         | 3.3   | 0.7  | 16.121 | NA | NA | hypothetical protein |
| Bdor1836/CDS/CDS                            | 19.5  | 4.0  | 16.121 | NA | NA | hypothetical protein |
| Msm0766/CDS[biotin-[acetyl-CoA-carboxylase] | 9.8   | 2.0  | 16.121 | NA | NA | hypothetical protein |
| TS28Rum14135/CDS/CDS                        | 34.0  | 7.0  | 16.062 | NA | NA | hypothetical protein |
| TS28Par0007/CDS/CDS                         | 1.8   | 0.4  | 16.026 | NA | NA | hypothetical protein |
| BT4263/CDS[gluceraldehyde                   | 1.2   | 0.3  | 16.020 | NA | NA | hypothetical protein |
| Bsp1162550/CDS/CDS                          | 1.2   | 0.3  | 16.020 | NA | NA | hypothetical protein |
| Bdor0018/CDS/CDS                            | 9.7   | 2.0  | 15.984 | NA | NA | hypothetical protein |
| TS28Rum03031/CDS/CDS                        | 29.0  | 6.0  | 15.984 | NA | NA | hypothetical protein |
| TS29Bac02877/CDS/CDS                        | 4.8   | 1.0  | 15.984 | NA | NA | hypothetical protein |
| TS28Ali2086/CDS/CDS                         | 48.0  | 10.0 | 15.873 | NA | NA | hypothetical protein |
| BVU3609/CDS/ABC                             | 24.0  | 5.0  | 15.873 | NA | NA | hypothetical protein |
| BVU2993/CDS/F0F1                            | 26.3  | 5.5  | 15.833 | NA | NA | hypothetical protein |
| Msm0322/CDS[predicted                       | 3.8   | 0.8  | 15.831 | NA | NA | hypothetical protein |
| TS28Fae10171/CDS/CDS                        | 67.0  | 14.0 | 15.826 | NA | NA | hypothetical protein |
| TS28Fae10173/CDS/CDS                        | 43.0  | 9.0  | 15.800 | NA | NA | hypothetical protein |
| Msm1454/CDS[predicted                       | 10.3  | 2.2  | 15.772 | NA | NA | hypothetical protein |
| TS28Fae17838/CDS/CDS                        | 9.5   | 2.0  | 15.708 | NA | NA | hypothetical protein |
| Msmi740339/CDS/CDS                          | 9.5   | 2.0  | 15.708 | NA | NA | hypothetical protein |
| TS28Fae10170/CDS/CDS                        | 19.0  | 4.0  | 15.708 | NA | NA | hypothetical protein |
| Pmer1229/CDS/CDS                            | 9.5   | 2.0  | 15.708 | NA | NA | hypothetical protein |
| Bste2164/CDS/CDS                            | 19.0  | 4.0  | 15.708 | NA | NA | hypothetical protein |
| Pmer2645/CDS/CDS                            | 9.5   | 2.0  | 15.708 | NA | NA | hypothetical protein |
| TS28Ali1633/CDS/CDS                         | 85.5  | 18.0 | 15.708 | NA | NA | hypothetical protein |
| TS28Fae11485/CDS/CDS                        | 19.0  | 4.0  | 15.708 | NA | NA | hypothetical protein |
| BVU1943/CDS[hypothetical                    | 52.0  | 11.0 | 15.633 | NA | NA | hypothetical protein |
| Aput0299/CDS/CDS                            | 33.0  | 7.0  | 15.590 | NA | NA | hypothetical protein |
| TS28Col0633/CDS/CDS                         | 33.0  | 7.0  | 15.590 | NA | NA | hypothetical protein |
| BVU3530/CDS[glutamine                       | 23.5  | 5.0  | 15.543 | NA | NA | hypothetical protein |
| TS28Bac4616/CDS/CDS                         | 23.5  | 5.0  | 15.543 | NA | NA | hypothetical protein |
| TS28Eub5740/CDS/CDS                         | 23.5  | 5.0  | 15.543 | NA | NA | hypothetical protein |
| Bova4219/CDS/CDS                            | 2.4   | 0.5  | 15.543 | NA | NA | hypothetical protein |
| Bxv11316/CDS/CDS                            | 20.3  | 4.3  | 15.517 | NA | NA | hypothetical protein |
| TS28Ali1771/CDS/CDS                         | 37.5  | 8.0  | 15.501 | NA | NA | hypothetical protein |
| TS28Met0821/CDS/CDS                         | 52.9  | 11.3 | 15.440 | NA | NA | hypothetical protein |
| Buni3623/CDS/CDS                            | 14.0  | 3.0  | 15.432 | NA | NA | hypothetical protein |
| TS28Bif1446/CDS/CDS                         | 7.0   | 1.5  | 15.432 | NA | NA | hypothetical protein |
| Bdor0684/CDS/CDS                            | 14.0  | 3.0  | 15.432 | NA | NA | hypothetical protein |
| TS28Eub8606/CDS/CDS                         | 14.0  | 3.0  | 15.432 | NA | NA | hypothetical protein |
| Msm1471/CDS[acetyl-CoA                      | 14.0  | 3.0  | 15.432 | NA | NA | hypothetical protein |
| Rumhyd3576/CDS/CDS                          | 28.0  | 6.0  | 15.432 | NA | NA | hypothetical protein |
| Bdor4427/CDS/CDS                            | 63.0  | 13.5 | 15.432 | NA | NA | hypothetical protein |
| Aco12273/CDS/CDS                            | 14.0  | 3.0  | 15.432 | NA | NA | hypothetical protein |
| TS28Par0392/CDS/CDS                         | 7.0   | 1.5  | 15.432 | NA | NA | hypothetical protein |
| HPAG10625/CDS[putative                      | 14.0  | 3.0  | 15.432 | NA | NA | hypothetical protein |
| FpraM2122221/CDS/CDS                        | 14.0  | 3.0  | 15.432 | NA | NA | hypothetical protein |
| TS28Ali0075/CDS/CDS                         | 14.0  | 3.0  | 15.432 | NA | NA | hypothetical protein |
| Pmer0570/CDS/CDS                            | 14.0  | 3.0  | 15.432 | NA | NA | hypothetical protein |
| TS28Ali1725/CDS/CDS                         | 14.0  | 3.0  | 15.432 | NA | NA | hypothetical protein |
| Bova2171/CDS/CDS                            | 2.3   | 0.5  | 15.432 | NA | NA | hypothetical protein |
| TS29Bac12023/CDS/CDS                        | 4.7   | 1.0  | 15.432 | NA | NA | hypothetical protein |
| b2942/CDS[imethionine                       | 4.7   | 1.0  | 15.432 | NA | NA | hypothetical protein |
| TS29Fae04859/CDS/CDS                        | 2.3   | 0.5  | 15.432 | NA | NA | hypothetical protein |
| TS29Rum02139/CDS/CDS                        | 2.3   | 0.5  | 15.432 | NA | NA | hypothetical protein |
| FpraM2120878/CDS/CDS                        | 5.8   | 1.3  | 15.344 | NA | NA | hypothetical protein |
| TS28Ali2376/CDS/CDS                         | 88.0  | 19.0 | 15.316 | NA | NA | hypothetical protein |
| Acae0859/CDS/CDS                            | 0.9   | 0.2  | 15.295 | NA | NA | hypothetical protein |
| TS28Rum15902/CDS/CDS                        | 69.0  | 15.0 | 15.212 | NA | NA | hypothetical protein |
| Bdor1963/CDS/CDS                            | 11.5  | 2.5  | 15.212 | NA | NA | hypothetical protein |
| Buni3559/CDS/CDS                            | 4.6   | 1.0  | 15.157 | NA | NA | hypothetical protein |
| TS28Bac2481/CDS/CDS                         | 4.6   | 1.0  | 15.157 | NA | NA | hypothetical protein |
| TS28Bac6559/CDS/CDS                         | 40.3  | 8.8  | 15.100 | NA | NA | hypothetical protein |
| TS28RumUnc1683/CDS/CDS                      | 105.0 | 23.0 | 15.097 | NA | NA | hypothetical protein |
| Bdor0190/CDS/CDS                            | 13.7  | 3.0  | 15.065 | NA | NA | hypothetical protein |
| TS29Fae03931/CDS/CDS                        | 18.2  | 4.0  | 15.019 | NA | NA | hypothetical protein |
| BVU4120/CDS[glucosamine-6-phosphate         | 28.7  | 6.3  | 14.968 | NA | NA | hypothetical protein |
| Msm1020/CDS[Fe-S                            | 1.5   | 0.3  | 14.881 | NA | NA | hypothetical protein |
| TS29Bac10053/CDS/CDS                        | 3.0   | 0.7  | 14.881 | NA | NA | hypothetical protein |
| TS29Fae03933/CDS/CDS                        | 3.0   | 0.7  | 14.881 | NA | NA | hypothetical protein |
| Msm0972/CDS[tRNA-dihydrouridine             | 1.5   | 0.3  | 14.881 | NA | NA | hypothetical protein |
| Msm0428/CDS[integrase-recombinase           | 1.5   | 0.3  | 14.881 | NA | NA | hypothetical protein |
| Buni0453/CDS/CDS                            | 1.5   | 0.3  | 14.881 | NA | NA | hypothetical protein |
| Msm1785/CDS[hypothetical                    | 1.5   | 0.3  | 14.881 | NA | NA | hypothetical protein |
| Msm0054/CDS[2'-5'                           | 1.5   | 0.3  | 14.881 | NA | NA | hypothetical protein |
| CspM6212207/CDS/CDS                         | 6.0   | 1.3  | 14.881 | NA | NA | hypothetical protein |
| Bdor0123/CDS/CDS                            | 19.5  | 4.3  | 14.881 | NA | NA | hypothetical protein |
| TS29Fae10158/CDS/CDS                        | 4.5   | 1.0  | 14.881 | NA | NA | hypothetical protein |
| TS28Rum1142/CDS/CDS                         | 9.0   | 2.0  | 14.881 | NA | NA | hypothetical protein |
| TS29Fae01274/CDS/CDS                        | 9.0   | 2.0  | 14.881 | NA | NA | hypothetical protein |
| TS29Rum15412/CDS/CDS                        | 9.0   | 2.0  | 14.881 | NA | NA | hypothetical protein |
| Char0708/CDS/CDS                            | 9.0   | 2.0  | 14.881 | NA | NA | hypothetical protein |
| TS29Fae00281/CDS/CDS                        | 4.5   | 1.0  | 14.881 | NA | NA | hypothetical protein |
| CspSS22348/CDS/CDS                          | 9.0   | 2.0  | 14.881 | NA | NA | hypothetical protein |



|                                   |       |      |        |    |    |                      |
|-----------------------------------|-------|------|--------|----|----|----------------------|
| TS28Fae00774 CDS CDS              | 9.0   | 2.0  | 14.881 | NA | NA | hypothetical protein |
| b2761 CDS conserved               | 4.5   | 1.0  | 14.881 | NA | NA | hypothetical protein |
| Bste2587 CDS CDS                  | 9.0   | 2.0  | 14.881 | NA | NA | hypothetical protein |
| TS29Rum09372 CDS CDS              | 9.0   | 2.0  | 14.881 | NA | NA | hypothetical protein |
| HPAG11388 CDS hypothetical        | 9.0   | 2.0  | 14.881 | NA | NA | hypothetical protein |
| TS29Bac02133 CDS CDS              | 9.0   | 2.0  | 14.881 | NA | NA | hypothetical protein |
| b2067 CDS predicted               | 4.5   | 1.0  | 14.881 | NA | NA | hypothetical protein |
| Ccom1871 CDS CDS                  | 9.0   | 2.0  | 14.881 | NA | NA | hypothetical protein |
| b3519 CDS evtonplasmic            | 4.5   | 1.0  | 14.881 | NA | NA | hypothetical protein |
| TS29Fae01399 CDS CDS              | 9.0   | 2.0  | 14.881 | NA | NA | hypothetical protein |
| HPAG11469 CDS Siiron(III)         | 9.0   | 2.0  | 14.881 | NA | NA | hypothetical protein |
| TS29Fae01599 CDS CDS              | 9.0   | 2.0  | 14.881 | NA | NA | hypothetical protein |
| TS29Rum03632 CDS CDS              | 9.0   | 2.0  | 14.881 | NA | NA | hypothetical protein |
| Pmer0604 CDS CDS                  | 9.0   | 2.0  | 14.881 | NA | NA | hypothetical protein |
| TS28Par2125 CDS CDS               | 4.5   | 1.0  | 14.881 | NA | NA | hypothetical protein |
| TS28Fae16047 CDS CDS              | 9.0   | 2.0  | 14.881 | NA | NA | hypothetical protein |
| TS28Rum02284 CDS CDS              | 2.3   | 0.5  | 14.881 | NA | NA | hypothetical protein |
| BDI2375 CDS 50S                   | 9.0   | 2.0  | 14.881 | NA | NA | hypothetical protein |
| TS28Ali1262 CDS CDS               | 9.0   | 2.0  | 14.881 | NA | NA | hypothetical protein |
| TS28Clo05407 CDS CDS              | 9.0   | 2.0  | 14.881 | NA | NA | hypothetical protein |
| BVU1469 CDS hypothetical          | 22.5  | 5.0  | 14.881 | NA | NA | hypothetical protein |
| TS29Fae08913 CDS CDS              | 4.5   | 1.0  | 14.881 | NA | NA | hypothetical protein |
| b3588 CDS aldehdvde               | 4.5   | 1.0  | 14.881 | NA | NA | hypothetical protein |
| Buni3577 CDS CDS                  | 11.3  | 2.5  | 14.881 | NA | NA | hypothetical protein |
| b2456 CDS predicted               | 4.5   | 1.0  | 14.881 | NA | NA | hypothetical protein |
| HPAG11013 CDS alpha               | 4.5   | 1.0  | 14.881 | NA | NA | hypothetical protein |
| TS28Par2060 CDS CDS               | 4.5   | 1.0  | 14.881 | NA | NA | hypothetical protein |
| TS28Clo07192 CDS CDS              | 18.0  | 4.0  | 14.881 | NA | NA | hypothetical protein |
| Rumhvd3570 CDS CDS                | 9.0   | 2.0  | 14.881 | NA | NA | hypothetical protein |
| b3955 CDS conserved               | 4.5   | 1.0  | 14.881 | NA | NA | hypothetical protein |
| TS28Eub5220 CDS CDS               | 217.5 | 48.5 | 14.830 | NA | NA | hypothetical protein |
| TS28Ali2286 CDS CDS               | 215.0 | 48.0 | 14.812 | NA | NA | hypothetical protein |
| TS28Bac7403 CDS CDS               | 38.0  | 8.5  | 14.784 | NA | NA | hypothetical protein |
| TS28Ali1840 CDS CDS               | 58.0  | 13.0 | 14.754 | NA | NA | hypothetical protein |
| Msm0530 CDS predicted             | 8.9   | 2.0  | 14.743 | NA | NA | hypothetical protein |
| TS29Fae06615 CDS CDS              | 93.5  | 21.0 | 14.724 | NA | NA | hypothetical protein |
| BVU1887 CDS hypothetical          | 40.0  | 9.0  | 14.697 | NA | NA | hypothetical protein |
| TS29Bac01847 CDS CDS              | 13.3  | 3.0  | 14.697 | NA | NA | hypothetical protein |
| Msm0516 CDS corrinoid             | 5.9   | 1.3  | 14.675 | NA | NA | hypothetical protein |
| TS28Fae13772 CDS CDS              | 24.3  | 5.5  | 14.581 | NA | NA | hypothetical protein |
| Msm0558 CDS pyruvate:ferredoxin   | 7.3   | 1.7  | 14.551 | NA | NA | hypothetical protein |
| BVU4141 CDS sialate               | 3.7   | 0.8  | 14.551 | NA | NA | hypothetical protein |
| Robe0842 CDS CDS                  | 11.0  | 2.5  | 14.551 | NA | NA | hypothetical protein |
| TS28RumUnc0011 CDS CDS            | 22.0  | 5.0  | 14.551 | NA | NA | hypothetical protein |
| TS28Clo07962 CDS CDS              | 22.0  | 5.0  | 14.551 | NA | NA | hypothetical protein |
| Bova1547 CDS CDS                  | 2.2   | 0.5  | 14.551 | NA | NA | hypothetical protein |
| BVU3048 CDS putative              | 11.0  | 2.5  | 14.551 | NA | NA | hypothetical protein |
| TS28Par1962 CDS CDS               | 11.0  | 2.5  | 14.551 | NA | NA | hypothetical protein |
| Msm1750667 CDS CDS                | 6.6   | 1.5  | 14.514 | NA | NA | hypothetical protein |
| BVU2737 CDS serine                | 175.5 | 40.0 | 14.509 | NA | NA | hypothetical protein |
| BVU2304 CDS hypothetical          | 144.5 | 33.0 | 14.480 | NA | NA | hypothetical protein |
| Msm1122 CDS coenzvme              | 18.2  | 4.2  | 14.471 | NA | NA | hypothetical protein |
| TS28Fae20467 CDS CDS              | 305.0 | 70.0 | 14.409 | NA | NA | hypothetical protein |
| Msm1284 CDS pyruvate              | 2.2   | 0.5  | 14.330 | NA | NA | hypothetical protein |
| Bdor3136 CDS CDS                  | 21.7  | 5.0  | 14.330 | NA | NA | hypothetical protein |
| BVU3054 CDS transcriptional       | 8.7   | 2.0  | 14.330 | NA | NA | hypothetical protein |
| Msm1480 CDS predicted             | 8.7   | 2.0  | 14.330 | NA | NA | hypothetical protein |
| HPAG11210 CDS NADH                | 13.0  | 3.0  | 14.330 | NA | NA | hypothetical protein |
| TS29Clo4979 CDS CDS               | 13.0  | 3.0  | 14.330 | NA | NA | hypothetical protein |
| Rtor0412 CDS CDS                  | 13.0  | 3.0  | 14.330 | NA | NA | hypothetical protein |
| BVU3234 CDS Na(+)-translocating   | 6.5   | 1.5  | 14.330 | NA | NA | hypothetical protein |
| Pmer2965 CDS CDS                  | 6.5   | 1.5  | 14.330 | NA | NA | hypothetical protein |
| Bxyl3032 CDS CDS                  | 6.5   | 1.5  | 14.330 | NA | NA | hypothetical protein |
| TS28Clo02037 CDS CDS              | 52.0  | 12.0 | 14.330 | NA | NA | hypothetical protein |
| TS29Fae01271 CDS CDS              | 13.0  | 3.0  | 14.330 | NA | NA | hypothetical protein |
| TS29Bac12187 CDS CDS              | 13.0  | 3.0  | 14.330 | NA | NA | hypothetical protein |
| TS28Ali0196 CDS CDS               | 39.0  | 9.0  | 14.330 | NA | NA | hypothetical protein |
| Bdor4047 CDS CDS                  | 13.0  | 3.0  | 14.330 | NA | NA | hypothetical protein |
| TS28Clo02047 CDS CDS              | 26.0  | 6.0  | 14.330 | NA | NA | hypothetical protein |
| TS29Bac02389 CDS CDS              | 6.5   | 1.5  | 14.330 | NA | NA | hypothetical protein |
| TS28Fae06331 CDS CDS              | 13.0  | 3.0  | 14.330 | NA | NA | hypothetical protein |
| TS28Clo02816 CDS CDS              | 13.0  | 3.0  | 14.330 | NA | NA | hypothetical protein |
| TS28Rum10815 CDS CDS              | 13.0  | 3.0  | 14.330 | NA | NA | hypothetical protein |
| TS29Rum05543 CDS CDS              | 4.3   | 1.0  | 14.330 | NA | NA | hypothetical protein |
| b0660 CDS predicted               | 4.3   | 1.0  | 14.330 | NA | NA | hypothetical protein |
| TS28Met1235 CDS CDS               | 2.2   | 0.5  | 14.330 | NA | NA | hypothetical protein |
| Msm1085 CDS aquaporin             | 2.9   | 0.7  | 14.302 | NA | NA | hypothetical protein |
| Msm1740637 CDS CDS                | 5.8   | 1.3  | 14.261 | NA | NA | hypothetical protein |
| TS28Fae10754 CDS CDS              | 32.3  | 7.5  | 14.257 | NA | NA | hypothetical protein |
| TS29Fae09687 CDS CDS              | 32.3  | 7.5  | 14.257 | NA | NA | hypothetical protein |
| BVU2254 CDS hypothetical          | 118.5 | 27.5 | 14.250 | NA | NA | hypothetical protein |
| TS29Fae06988 CDS CDS              | 21.5  | 5.0  | 14.220 | NA | NA | hypothetical protein |
| Msm0156 CDS asparyl/glutamyl-tRNA | 2.2   | 0.5  | 14.220 | NA | NA | hypothetical protein |
| BVU0051 CDS hypothetical          | 72.3  | 16.8 | 14.210 | NA | NA | hypothetical protein |
| TS28Bac5355 CDS CDS               | 30.0  | 7.0  | 14.173 | NA | NA | hypothetical protein |
| Msm1561 CDS hypothetical          | 11.8  | 2.8  | 14.150 | NA | NA | hypothetical protein |
| BVU0517 CDS dihydropteroate       | 5.7   | 1.3  | 14.054 | NA | NA | hypothetical protein |
| Msm1232 CDS signal                | 5.7   | 1.3  | 14.054 | NA | NA | hypothetical protein |
| Msm0325 CDS hypothetical          | 4.3   | 1.0  | 14.054 | NA | NA | hypothetical protein |
| TS29Fae02120 CDS CDS              | 8.5   | 2.0  | 14.054 | NA | NA | hypothetical protein |
| TS28Bac5799 CDS CDS               | 8.5   | 2.0  | 14.054 | NA | NA | hypothetical protein |
| BactD14017 CDS CDS                | 4.3   | 1.0  | 14.054 | NA | NA | hypothetical protein |

|                                       |       |      |        |    |    |                      |
|---------------------------------------|-------|------|--------|----|----|----------------------|
| TS28Bac7626/CDS/CDS                   | 8.5   | 2.0  | 14.054 | NA | NA | hypothetical protein |
| Msm0966/CDS/predicted                 | 4.3   | 1.0  | 14.054 | NA | NA | hypothetical protein |
| TS28Clo06556/CDS/CDS                  | 17.0  | 4.0  | 14.054 | NA | NA | hypothetical protein |
| TS28Clo07006/CDS/CDS                  | 17.0  | 4.0  | 14.054 | NA | NA | hypothetical protein |
| BactD12151/CDS/CDS                    | 4.3   | 1.0  | 14.054 | NA | NA | hypothetical protein |
| TS28Ali0628/CDS/CDS                   | 17.0  | 4.0  | 14.054 | NA | NA | hypothetical protein |
| TS28Ali1053/CDS/CDS                   | 34.0  | 8.0  | 14.054 | NA | NA | hypothetical protein |
| TS29Rum00095/CDS/CDS                  | 8.5   | 2.0  | 14.054 | NA | NA | hypothetical protein |
| TS28Ali0288/CDS/CDS                   | 266.0 | 63.0 | 13.963 | NA | NA | hypothetical protein |
| BVU0790/CDS/S0S                       | 67.2  | 16.0 | 13.896 | NA | NA | hypothetical protein |
| Msm0848/CDS/predicted                 | 3.5   | 0.8  | 13.889 | NA | NA | hypothetical protein |
| Msm1478/CDS/phenylalanyl-tRNA         | 10.5  | 2.5  | 13.889 | NA | NA | hypothetical protein |
| TS28Rum03425/CDS/CDS                  | 10.5  | 2.5  | 13.889 | NA | NA | hypothetical protein |
| TS28Bac1064/CDS/CDS                   | 21.0  | 5.0  | 13.889 | NA | NA | hypothetical protein |
| TS28Bac5486/CDS/CDS                   | 29.3  | 7.0  | 13.858 | NA | NA | hypothetical protein |
| TS28Eub2090/CDS/CDS                   | 20.9  | 5.0  | 13.801 | NA | NA | hypothetical protein |
| TS28Fae10167/CDS/CDS                  | 8.3   | 2.0  | 13.779 | NA | NA | hypothetical protein |
| TS29Fae03168/CDS/CDS                  | 12.5  | 3.0  | 13.779 | NA | NA | hypothetical protein |
| TS28Par0360/CDS/CDS                   | 12.5  | 3.0  | 13.779 | NA | NA | hypothetical protein |
| BVU12795/CDS/G-phosphogluconate       | 25.0  | 6.0  | 13.779 | NA | NA | hypothetical protein |
| FpraM2120394/CDS/CDS                  | 2.1   | 0.5  | 13.779 | NA | NA | hypothetical protein |
| BVU2242/CDS/putative                  | 12.5  | 3.0  | 13.779 | NA | NA | hypothetical protein |
| Msm0849/CDS/molvbdenum                | 3.8   | 0.9  | 13.709 | NA | NA | hypothetical protein |
| TS28Clo02045/CDS/CDS                  | 29.0  | 7.0  | 13.700 | NA | NA | hypothetical protein |
| Dfor0620/CDS/CDS                      | 14.5  | 3.5  | 13.700 | NA | NA | hypothetical protein |
| TS28Eub4865/CDS/CDS                   | 124.2 | 30.0 | 13.687 | NA | NA | hypothetical protein |
| TS28Ali2331/CDS/CDS                   | 155.0 | 37.5 | 13.669 | NA | NA | hypothetical protein |
| Pmer3010/CDS/CDS                      | 41.3  | 10.0 | 13.669 | NA | NA | hypothetical protein |
| Msm0075/CDS/DNA                       | 5.5   | 1.3  | 13.641 | NA | NA | hypothetical protein |
| Msm1037/CDS/proteasome                | 2.8   | 0.7  | 13.641 | NA | NA | hypothetical protein |
| Msm1750586/CDS/CDS                    | 2.8   | 0.7  | 13.641 | NA | NA | hypothetical protein |
| Bxyl1553/CDS/CDS                      | 5.5   | 1.3  | 13.641 | NA | NA | hypothetical protein |
| TS29Bac00399/CDS/CDS                  | 5.5   | 1.3  | 13.641 | NA | NA | hypothetical protein |
| CspM6211317/CDS/CDS                   | 13.7  | 3.3  | 13.558 | NA | NA | hypothetical protein |
| Cnex1177/CDS/CDS                      | 4.1   | 1.0  | 13.528 | NA | NA | hypothetical protein |
| TS29Fae10123/CDS/CDS                  | 24.5  | 6.0  | 13.503 | NA | NA | hypothetical protein |
| Msm1751678/CDS/CDS                    | 10.2  | 2.5  | 13.448 | NA | NA | hypothetical protein |
| TS28Fae01246/CDS/CDS                  | 65.0  | 16.0 | 13.434 | NA | NA | hypothetical protein |
| TS29Eub0058/CDS/CDS                   | 32.5  | 8.0  | 13.434 | NA | NA | hypothetical protein |
| TS28Clo02042/CDS/CDS                  | 69.0  | 17.0 | 13.422 | NA | NA | hypothetical protein |
| TS28Ali1426/CDS/CDS                   | 52.5  | 13.0 | 13.355 | NA | NA | hypothetical protein |
| BVU0013/CDS/S0S                       | 64.5  | 16.0 | 13.338 | NA | NA | hypothetical protein |
| TS28Ali1358/CDS/CDS                   | 197.0 | 49.0 | 13.295 | NA | NA | hypothetical protein |
| FpraM2120354/CDS/CDS                  | 2.0   | 0.5  | 13.228 | NA | NA | hypothetical protein |
| STER1942/CDS/anaerobic                | 6.7   | 1.7  | 13.228 | NA | NA | hypothetical protein |
| BL0615/CDS/alkyl                      | 1.3   | 0.3  | 13.228 | NA | NA | hypothetical protein |
| TS29Rum05541/CDS/CDS                  | 1.3   | 0.3  | 13.228 | NA | NA | hypothetical protein |
| TS28Clo03934/CDS/CDS                  | 12.0  | 3.0  | 13.228 | NA | NA | hypothetical protein |
| TS28Ali1027/CDS/CDS                   | 52.0  | 13.0 | 13.228 | NA | NA | hypothetical protein |
| Bdor0496/CDS/CDS                      | 12.0  | 3.0  | 13.228 | NA | NA | hypothetical protein |
| TS28Fae07864/CDS/CDS                  | 20.0  | 5.0  | 13.228 | NA | NA | hypothetical protein |
| TS28Fae03912/CDS/CDS                  | 12.0  | 3.0  | 13.228 | NA | NA | hypothetical protein |
| TS28Clo02083/CDS/CDS                  | 12.0  | 3.0  | 13.228 | NA | NA | hypothetical protein |
| TS28Clo07921/CDS/CDS                  | 20.0  | 5.0  | 13.228 | NA | NA | hypothetical protein |
| TS28Fae10851/CDS/CDS                  | 12.0  | 3.0  | 13.228 | NA | NA | hypothetical protein |
| Bste1800/CDS/CDS                      | 6.0   | 1.5  | 13.228 | NA | NA | hypothetical protein |
| Bthe3733487/CDS/CDS                   | 6.0   | 1.5  | 13.228 | NA | NA | hypothetical protein |
| Bdor0286/CDS/CDS                      | 12.0  | 3.0  | 13.228 | NA | NA | hypothetical protein |
| BactD13831/CDS/CDS                    | 6.0   | 1.5  | 13.228 | NA | NA | hypothetical protein |
| TS29Fae06140/CDS/CDS                  | 6.0   | 1.5  | 13.228 | NA | NA | hypothetical protein |
| TS28Clo09581/CDS/CDS                  | 12.0  | 3.0  | 13.228 | NA | NA | hypothetical protein |
| TS28Clo05714/CDS/CDS                  | 12.0  | 3.0  | 13.228 | NA | NA | hypothetical protein |
| TS28RumUnc1569/CDS/CDS                | 12.0  | 3.0  | 13.228 | NA | NA | hypothetical protein |
| TS28Ali2393/CDS/CDS                   | 12.0  | 3.0  | 13.228 | NA | NA | hypothetical protein |
| Cbar2741/CDS/CDS                      | 4.0   | 1.0  | 13.228 | NA | NA | hypothetical protein |
| TS29Rum08845/CDS/CDS                  | 4.0   | 1.0  | 13.228 | NA | NA | hypothetical protein |
| HPAG10807/CDS/excinuclease            | 4.0   | 1.0  | 13.228 | NA | NA | hypothetical protein |
| CspM6211664/CDS/CDS                   | 4.0   | 1.0  | 13.228 | NA | NA | hypothetical protein |
| TS29Bac06166/CDS/CDS                  | 1.0   | 0.3  | 13.228 | NA | NA | hypothetical protein |
| Ehal1545/CDS/CDS                      | 2.0   | 0.5  | 13.228 | NA | NA | hypothetical protein |
| Dfor0358/CDS/CDS                      | 4.0   | 1.0  | 13.228 | NA | NA | hypothetical protein |
| Svar0140/CDS/CDS                      | 4.0   | 1.0  | 13.228 | NA | NA | hypothetical protein |
| Bdor2574/CDS/CDS                      | 8.0   | 2.0  | 13.228 | NA | NA | hypothetical protein |
| TS28Bac5689/CDS/CDS                   | 16.0  | 4.0  | 13.228 | NA | NA | hypothetical protein |
| Msm1048/CDS/phosphonothienovlcysteine | 1.0   | 0.3  | 13.228 | NA | NA | hypothetical protein |
| CspSS21914/CDS/CDS                    | 2.0   | 0.5  | 13.228 | NA | NA | hypothetical protein |
| TS29Bac02429/CDS/CDS                  | 8.0   | 2.0  | 13.228 | NA | NA | hypothetical protein |
| TS28Clo09424/CDS/CDS                  | 8.0   | 2.0  | 13.228 | NA | NA | hypothetical protein |
| BVU3877/CDS/hypothetical              | 4.0   | 1.0  | 13.228 | NA | NA | hypothetical protein |
| TS29Rum13848/CDS/CDS                  | 8.0   | 2.0  | 13.228 | NA | NA | hypothetical protein |
| TS28Par0861/CDS/CDS                   | 4.0   | 1.0  | 13.228 | NA | NA | hypothetical protein |
| TS29Fae04484/CDS/CDS                  | 4.0   | 1.0  | 13.228 | NA | NA | hypothetical protein |
| EUBREC2217/CDS/homoserine             | 4.0   | 1.0  | 13.228 | NA | NA | hypothetical protein |
| TS28Par2021/CDS/CDS                   | 2.0   | 0.5  | 13.228 | NA | NA | hypothetical protein |
| TS28Bac1168/CDS/CDS                   | 4.0   | 1.0  | 13.228 | NA | NA | hypothetical protein |
| BactD20559/CDS/CDS                    | 4.0   | 1.0  | 13.228 | NA | NA | hypothetical protein |
| TS29Eub1214/CDS/CDS                   | 4.0   | 1.0  | 13.228 | NA | NA | hypothetical protein |
| Cbo14050/CDS/CDS                      | 4.0   | 1.0  | 13.228 | NA | NA | hypothetical protein |
| TS28Fae14836/CDS/CDS                  | 2.0   | 0.5  | 13.228 | NA | NA | hypothetical protein |
| TS28Bac7821/CDS/CDS                   | 8.0   | 2.0  | 13.228 | NA | NA | hypothetical protein |
| Msm1543/CDS/hypothetical              | 1.0   | 0.3  | 13.228 | NA | NA | hypothetical protein |
| TS28Ali1438/CDS/CDS                   | 4.0   | 1.0  | 13.228 | NA | NA | hypothetical protein |

|                                            |      |     |        |    |    |                      |
|--------------------------------------------|------|-----|--------|----|----|----------------------|
| TS29Fae05935/CDS/CDS                       | 8.0  | 2.0 | 13.228 | NA | NA | hypothetical protein |
| Robe2378/CDS/CDS                           | 2.0  | 0.5 | 13.228 | NA | NA | hypothetical protein |
| b4130/CDS/predicted                        | 4.0  | 1.0 | 13.228 | NA | NA | hypothetical protein |
| TS29Rum17254/CDS/CDS                       | 4.0  | 1.0 | 13.228 | NA | NA | hypothetical protein |
| Ccom0430/CDS/CDS                           | 4.0  | 1.0 | 13.228 | NA | NA | hypothetical protein |
| b3958/CDS/N-acetyl-gamma-glutamylphosphate | 2.0  | 0.5 | 13.228 | NA | NA | hypothetical protein |
| Rtor0930/CDS/CDS                           | 4.0  | 1.0 | 13.228 | NA | NA | hypothetical protein |
| HPAG10528/CDS/transcription                | 4.0  | 1.0 | 13.228 | NA | NA | hypothetical protein |
| Csci0744/CDS/CDS                           | 4.0  | 1.0 | 13.228 | NA | NA | hypothetical protein |
| BactD10157/CDS/CDS                         | 1.0  | 0.3 | 13.228 | NA | NA | hypothetical protein |
| Bxyl1605/CDS/CDS                           | 2.0  | 0.5 | 13.228 | NA | NA | hypothetical protein |
| TS28Rum14905/CDS/CDS                       | 8.0  | 2.0 | 13.228 | NA | NA | hypothetical protein |
| Msm0661/CDS/30S                            | 1.0  | 0.3 | 13.228 | NA | NA | hypothetical protein |
| Dlon0951/CDS/CDS                           | 4.0  | 1.0 | 13.228 | NA | NA | hypothetical protein |
| TS28Fae15722/CDS/CDS                       | 8.0  | 2.0 | 13.228 | NA | NA | hypothetical protein |
| TS29Rum13482/CDS/CDS                       | 4.0  | 1.0 | 13.228 | NA | NA | hypothetical protein |
| HPAG10951/CDS/cobalt-zinc-cadmium          | 4.0  | 1.0 | 13.228 | NA | NA | hypothetical protein |
| TS28Eub0441/CDS/CDS                        | 2.0  | 0.5 | 13.228 | NA | NA | hypothetical protein |
| Msmi750006/CDS/CDS                         | 1.0  | 0.3 | 13.228 | NA | NA | hypothetical protein |
| TS28CloUnc085/CDS/CDS                      | 8.0  | 2.0 | 13.228 | NA | NA | hypothetical protein |
| TS28Fae19769/CDS/CDS                       | 8.0  | 2.0 | 13.228 | NA | NA | hypothetical protein |
| FpraM2122646/CDS/CDS                       | 2.0  | 0.5 | 13.228 | NA | NA | hypothetical protein |
| TS28Fae19788/CDS/CDS                       | 4.0  | 1.0 | 13.228 | NA | NA | hypothetical protein |
| TS28Ali1304/CDS/CDS                        | 4.0  | 1.0 | 13.228 | NA | NA | hypothetical protein |
| TS29Bac01238/CDS/CDS                       | 8.0  | 2.0 | 13.228 | NA | NA | hypothetical protein |
| HPAG11075/CDS/F0F1                         | 4.0  | 1.0 | 13.228 | NA | NA | hypothetical protein |
| Bova2602/CDS/CDS                           | 2.0  | 0.5 | 13.228 | NA | NA | hypothetical protein |
| Bthe7331635/CDS/CDS                        | 1.0  | 0.3 | 13.228 | NA | NA | hypothetical protein |
| Cbar0278/CDS/CDS                           | 4.0  | 1.0 | 13.228 | NA | NA | hypothetical protein |
| HPAG11351/CDS/hypothetical                 | 4.0  | 1.0 | 13.228 | NA | NA | hypothetical protein |
| Bthe7331630/CDS/CDS                        | 1.0  | 0.3 | 13.228 | NA | NA | hypothetical protein |
| Rbro0611/CDS/CDS                           | 2.0  | 0.5 | 13.228 | NA | NA | hypothetical protein |
| TS29Fae03042/CDS/CDS                       | 4.0  | 1.0 | 13.228 | NA | NA | hypothetical protein |
| Cspi1679/CDS/CDS                           | 4.0  | 1.0 | 13.228 | NA | NA | hypothetical protein |
| FpraM2121275/CDS/CDS                       | 8.0  | 2.0 | 13.228 | NA | NA | hypothetical protein |
| HPAG10819/CDS/hypothetical                 | 4.0  | 1.0 | 13.228 | NA | NA | hypothetical protein |
| HPAG10063/CDS/hypothetical                 | 4.0  | 1.0 | 13.228 | NA | NA | hypothetical protein |
| TS29Bac00022/CDS/CDS                       | 4.0  | 1.0 | 13.228 | NA | NA | hypothetical protein |
| Bdor3923/CDS/CDS                           | 4.0  | 1.0 | 13.228 | NA | NA | hypothetical protein |
| TS28Bac3703/CDS/CDS                        | 4.0  | 1.0 | 13.228 | NA | NA | hypothetical protein |
| TS28Clo04876/CDS/CDS                       | 4.0  | 1.0 | 13.228 | NA | NA | hypothetical protein |
| TS28Eub0683/CDS/CDS                        | 4.0  | 1.0 | 13.228 | NA | NA | hypothetical protein |
| EUBREC1612/CDS/unspecific                  | 2.0  | 0.5 | 13.228 | NA | NA | hypothetical protein |
| Acod0937/CDS/CDS                           | 4.0  | 1.0 | 13.228 | NA | NA | hypothetical protein |
| BactD10457/CDS/CDS                         | 4.0  | 1.0 | 13.228 | NA | NA | hypothetical protein |
| Cbar2423/CDS/CDS                           | 4.0  | 1.0 | 13.228 | NA | NA | hypothetical protein |
| TS29Fae04461/CDS/CDS                       | 4.0  | 1.0 | 13.228 | NA | NA | hypothetical protein |
| TS28Fae00154/CDS/CDS                       | 2.0  | 0.5 | 13.228 | NA | NA | hypothetical protein |
| HPAG10866/CDS/cysteinyI-tRNA               | 4.0  | 1.0 | 13.228 | NA | NA | hypothetical protein |
| HPAG10527/CDS/ glutamate                   | 4.0  | 1.0 | 13.228 | NA | NA | hypothetical protein |
| Bdor2760/CDS/CDS                           | 4.0  | 1.0 | 13.228 | NA | NA | hypothetical protein |
| Hfil1034/CDS/CDS                           | 4.0  | 1.0 | 13.228 | NA | NA | hypothetical protein |
| TS28Bac0284/CDS/CDS                        | 2.0  | 0.5 | 13.228 | NA | NA | hypothetical protein |
| TS28Clo04648/CDS/CDS                       | 16.0 | 4.0 | 13.228 | NA | NA | hypothetical protein |
| TS29Bac04550/CDS/CDS                       | 4.0  | 1.0 | 13.228 | NA | NA | hypothetical protein |
| EUBREC1870/CDS/DNA                         | 2.0  | 0.5 | 13.228 | NA | NA | hypothetical protein |
| TS28Bac5987/CDS/CDS                        | 4.0  | 1.0 | 13.228 | NA | NA | hypothetical protein |
| TS28Fae22056/CDS/CDS                       | 4.0  | 1.0 | 13.228 | NA | NA | hypothetical protein |
| Msm0344/CDS/hypothetical                   | 1.0  | 0.3 | 13.228 | NA | NA | hypothetical protein |
| FpraM2120641/CDS/CDS                       | 8.0  | 2.0 | 13.228 | NA | NA | hypothetical protein |
| Bdor0836/CDS/CDS                           | 4.0  | 1.0 | 13.228 | NA | NA | hypothetical protein |
| TS29Rum11626/CDS/CDS                       | 4.0  | 1.0 | 13.228 | NA | NA | hypothetical protein |
| TS28Par1876/CDS/CDS                        | 4.0  | 1.0 | 13.228 | NA | NA | hypothetical protein |
| TS29Bif0719/CDS/CDS                        | 4.0  | 1.0 | 13.228 | NA | NA | hypothetical protein |
| BVU2417/CDS/naphthoate                     | 8.0  | 2.0 | 13.228 | NA | NA | hypothetical protein |
| BactD10535/CDS/CDS                         | 8.0  | 2.0 | 13.228 | NA | NA | hypothetical protein |
| CspM6210520/CDS/CDS                        | 8.0  | 2.0 | 13.228 | NA | NA | hypothetical protein |
| TS28Par0874/CDS/CDS                        | 4.0  | 1.0 | 13.228 | NA | NA | hypothetical protein |
| Aput2122/CDS/CDS                           | 4.0  | 1.0 | 13.228 | NA | NA | hypothetical protein |
| TS29Rum13291/CDS/CDS                       | 4.0  | 1.0 | 13.228 | NA | NA | hypothetical protein |
| TS29Fae00819/CDS/CDS                       | 2.0  | 0.5 | 13.228 | NA | NA | hypothetical protein |
| Bdor0799/CDS/CDS                           | 2.0  | 0.5 | 13.228 | NA | NA | hypothetical protein |
| Bfin1852/CDS/CDS                           | 8.0  | 2.0 | 13.228 | NA | NA | hypothetical protein |
| TS28Par0261/CDS/CDS                        | 8.0  | 2.0 | 13.228 | NA | NA | hypothetical protein |
| BVU0261/CDS/hypothetical                   | 8.0  | 2.0 | 13.228 | NA | NA | hypothetical protein |
| BactD10160/CDS/CDS                         | 1.0  | 0.3 | 13.228 | NA | NA | hypothetical protein |
| TS28Col1158/CDS/CDS                        | 16.0 | 4.0 | 13.228 | NA | NA | hypothetical protein |
| Robe1610/CDS/CDS                           | 2.0  | 0.5 | 13.228 | NA | NA | hypothetical protein |
| CspSS22098/CDS/CDS                         | 4.0  | 1.0 | 13.228 | NA | NA | hypothetical protein |
| FpraM2122510/CDS/CDS                       | 4.0  | 1.0 | 13.228 | NA | NA | hypothetical protein |
| Bint0431/CDS/CDS                           | 1.0  | 0.3 | 13.228 | NA | NA | hypothetical protein |
| TS28Bac8326/CDS/CDS                        | 4.0  | 1.0 | 13.228 | NA | NA | hypothetical protein |
| Bfra31123676/CDS/CDS                       | 4.0  | 1.0 | 13.228 | NA | NA | hypothetical protein |
| BLD1592/CDS/NTP                            | 1.0  | 0.3 | 13.228 | NA | NA | hypothetical protein |
| EUBREC1648/CDS/ glutamate                  | 2.0  | 0.5 | 13.228 | NA | NA | hypothetical protein |
| TS29Rum08446/CDS/CDS                       | 4.0  | 1.0 | 13.228 | NA | NA | hypothetical protein |
| TS28Rum15686/CDS/CDS                       | 4.0  | 1.0 | 13.228 | NA | NA | hypothetical protein |
| BWH25658/CDS/CDS                           | 1.0  | 0.3 | 13.228 | NA | NA | hypothetical protein |
| L0277/CDS/DNA                              | 4.0  | 1.0 | 13.228 | NA | NA | hypothetical protein |
| Begg1204/CDS/CDS                           | 8.0  | 2.0 | 13.228 | NA | NA | hypothetical protein |
| HPAG10840/CDS/ phosphoheptose              | 4.0  | 1.0 | 13.228 | NA | NA | hypothetical protein |
| HPAG10347/CDS/ flagellar                   | 4.0  | 1.0 | 13.228 | NA | NA | hypothetical protein |

|                                 |       |      |        |    |    |                      |
|---------------------------------|-------|------|--------|----|----|----------------------|
| Acol0903/CDS/CDS                | 4.0   | 1.0  | 13.228 | NA | NA | hypothetical protein |
| TS28Fae07282/CDS/CDS            | 4.0   | 1.0  | 13.228 | NA | NA | hypothetical protein |
| TS28Rum01490/CDS/CDS            | 4.0   | 1.0  | 13.228 | NA | NA | hypothetical protein |
| Aput1043/CDS/CDS                | 1.0   | 0.3  | 13.228 | NA | NA | hypothetical protein |
| BactD20912/CDS/CDS              | 2.0   | 0.5  | 13.228 | NA | NA | hypothetical protein |
| TS28Fae03013/CDS/CDS            | 4.0   | 1.0  | 13.228 | NA | NA | hypothetical protein |
| Bova3305/CDS/CDS                | 4.0   | 1.0  | 13.228 | NA | NA | hypothetical protein |
| TS28Bac5336/CDS/CDS             | 4.0   | 1.0  | 13.228 | NA | NA | hypothetical protein |
| TS28Ali2349/CDS/CDS             | 4.0   | 1.0  | 13.228 | NA | NA | hypothetical protein |
| M23Apeg869/CDS/SSU              | 4.0   | 1.0  | 13.228 | NA | NA | hypothetical protein |
| TS28Eub2564/CDS/CDS             | 4.0   | 1.0  | 13.228 | NA | NA | hypothetical protein |
| Bdor0225/CDS/CDS                | 16.0  | 4.0  | 13.228 | NA | NA | hypothetical protein |
| Bdor3858/CDS/CDS                | 4.0   | 1.0  | 13.228 | NA | NA | hypothetical protein |
| TS28Bac1156/CDS/CDS             | 4.0   | 1.0  | 13.228 | NA | NA | hypothetical protein |
| TS29Rum13937/CDS/CDS            | 4.0   | 1.0  | 13.228 | NA | NA | hypothetical protein |
| Msm0779/CDS/predicted           | 1.0   | 0.3  | 13.228 | NA | NA | hypothetical protein |
| BactD12679/CDS/CDS              | 4.0   | 1.0  | 13.228 | NA | NA | hypothetical protein |
| TS29Fae00530/CDS/CDS            | 2.0   | 0.5  | 13.228 | NA | NA | hypothetical protein |
| Ccom1985/CDS/CDS                | 4.0   | 1.0  | 13.228 | NA | NA | hypothetical protein |
| TS28Fae05114/CDS/CDS            | 4.0   | 1.0  | 13.228 | NA | NA | hypothetical protein |
| BVU3855/CDS/putative            | 4.0   | 1.0  | 13.228 | NA | NA | hypothetical protein |
| TS28Fae14915/CDS/CDS            | 4.0   | 1.0  | 13.228 | NA | NA | hypothetical protein |
| Ehal1724/CDS/CDS                | 2.0   | 0.5  | 13.228 | NA | NA | hypothetical protein |
| TS29Bac02966/CDS/CDS            | 8.0   | 2.0  | 13.228 | NA | NA | hypothetical protein |
| TS28Fae13488/CDS/CDS            | 4.0   | 1.0  | 13.228 | NA | NA | hypothetical protein |
| TS29Eub1935/CDS/CDS             | 4.0   | 1.0  | 13.228 | NA | NA | hypothetical protein |
| HPAG10024/CDS/tyrne             | 4.0   | 1.0  | 13.228 | NA | NA | hypothetical protein |
| Bxyl4376/CDS/CDS                | 2.0   | 0.5  | 13.228 | NA | NA | hypothetical protein |
| Msmi750110/CDS/CDS              | 1.0   | 0.3  | 13.228 | NA | NA | hypothetical protein |
| Bega1865/CDS/CDS                | 8.0   | 2.0  | 13.228 | NA | NA | hypothetical protein |
| Pmer2373/CDS/CDS                | 4.0   | 1.0  | 13.228 | NA | NA | hypothetical protein |
| Dlon2195/CDS/CDS                | 8.0   | 2.0  | 13.228 | NA | NA | hypothetical protein |
| TS29Rum14917/CDS/CDS            | 2.0   | 0.5  | 13.228 | NA | NA | hypothetical protein |
| TS28Bac7744/CDS/CDS             | 2.0   | 0.5  | 13.228 | NA | NA | hypothetical protein |
| TS29Fae05047/CDS/CDS            | 4.0   | 1.0  | 13.228 | NA | NA | hypothetical protein |
| TS28Fae08291/CDS/CDS            | 4.0   | 1.0  | 13.228 | NA | NA | hypothetical protein |
| TS29Rum18577/CDS/CDS            | 4.0   | 1.0  | 13.228 | NA | NA | hypothetical protein |
| TS29Rum13085/CDS/CDS            | 8.0   | 2.0  | 13.228 | NA | NA | hypothetical protein |
| Hfil3435/CDS/CDS                | 4.0   | 1.0  | 13.228 | NA | NA | hypothetical protein |
| TS29Rum14482/CDS/CDS            | 8.0   | 2.0  | 13.228 | NA | NA | hypothetical protein |
| Bthe3734423/CDS/CDS             | 1.0   | 0.3  | 13.228 | NA | NA | hypothetical protein |
| Bthe3735760/CDS/CDS             | 1.0   | 0.3  | 13.228 | NA | NA | hypothetical protein |
| TS28Rum02945/CDS/CDS            | 4.0   | 1.0  | 13.228 | NA | NA | hypothetical protein |
| Msm1075/CDS/putative            | 1.0   | 0.3  | 13.228 | NA | NA | hypothetical protein |
| Acol1322/CDS/CDS                | 4.0   | 1.0  | 13.228 | NA | NA | hypothetical protein |
| Msmi740740/CDS/CDS              | 1.0   | 0.3  | 13.228 | NA | NA | hypothetical protein |
| TS29Bac04680/CDS/CDS            | 2.0   | 0.5  | 13.228 | NA | NA | hypothetical protein |
| TS29Bac11462/CDS/CDS            | 4.0   | 1.0  | 13.228 | NA | NA | hypothetical protein |
| Bthe3734418/CDS/CDS             | 1.0   | 0.3  | 13.228 | NA | NA | hypothetical protein |
| CspL21890/CDS/CDS               | 5.3   | 1.3  | 13.228 | NA | NA | hypothetical protein |
| TS29Rum06242/CDS/CDS            | 4.0   | 1.0  | 13.228 | NA | NA | hypothetical protein |
| TS28Bac6131/CDS/CDS             | 1.3   | 0.3  | 13.228 | NA | NA | hypothetical protein |
| BactD11099/CDS/CDS              | 1.3   | 0.3  | 13.228 | NA | NA | hypothetical protein |
| TS29Rum12818/CDS/CDS            | 1.3   | 0.3  | 13.228 | NA | NA | hypothetical protein |
| str1997/CDS/30S                 | 1.3   | 0.3  | 13.228 | NA | NA | hypothetical protein |
| stu1997/CDS/30S                 | 1.3   | 0.3  | 13.228 | NA | NA | hypothetical protein |
| Bova0103/CDS/CDS                | 1.3   | 0.3  | 13.228 | NA | NA | hypothetical protein |
| Msmi740189/CDS/CDS              | 1.3   | 0.3  | 13.228 | NA | NA | hypothetical protein |
| Bum0317/CDS/CDS                 | 1.3   | 0.3  | 13.228 | NA | NA | hypothetical protein |
| STER1973/CDS/30S                | 1.3   | 0.3  | 13.228 | NA | NA | hypothetical protein |
| BVU1351/CDS/protein             | 2.0   | 0.5  | 13.228 | NA | NA | hypothetical protein |
| TS29Fae00065/CDS/CDS            | 27.8  | 7.0  | 13.118 | NA | NA | hypothetical protein |
| Pmer2301/CDS/CDS                | 39.5  | 10.0 | 13.062 | NA | NA | hypothetical protein |
| BVU2888/CDS/putative            | 11.8  | 3.0  | 13.044 | NA | NA | hypothetical protein |
| BVU2668/CDS/hypothetical        | 59.0  | 15.0 | 13.007 | NA | NA | hypothetical protein |
| BVU0794/CDS/50S                 | 15.7  | 4.0  | 12.952 | NA | NA | hypothetical protein |
| TS28Ali1091/CDS/CDS             | 47.0  | 12.0 | 12.952 | NA | NA | hypothetical protein |
| TS28Ali0581/CDS/CDS             | 78.0  | 20.0 | 12.897 | NA | NA | hypothetical protein |
| BVU0865/CDS/hypothetical        | 19.5  | 5.0  | 12.897 | NA | NA | hypothetical protein |
| TS28Eub8039/CDS/CDS             | 56.5  | 14.5 | 12.886 | NA | NA | hypothetical protein |
| BVU0817/CDS/50S                 | 44.7  | 11.5 | 12.865 | NA | NA | hypothetical protein |
| BVU4062/CDS/Hollidav            | 5.8   | 1.5  | 12.860 | NA | NA | hypothetical protein |
| BactD13478/CDS/CDS              | 23.3  | 6.0  | 12.860 | NA | NA | hypothetical protein |
| BVU4109/CDS/glucose-6-phosphate | 15.5  | 4.0  | 12.814 | NA | NA | hypothetical protein |
| TS29Bac11641/CDS/CDS            | 9.7   | 2.5  | 12.787 | NA | NA | hypothetical protein |
| Msm0795/CDS/heterodisulfide     | 13.5  | 3.5  | 12.787 | NA | NA | hypothetical protein |
| Bova3102/CDS/CDS                | 23.2  | 6.0  | 12.768 | NA | NA | hypothetical protein |
| Msm0382/CDS/hypothetical        | 2.3   | 0.6  | 12.755 | NA | NA | hypothetical protein |
| Msmi740154/CDS/CDS              | 2.3   | 0.6  | 12.755 | NA | NA | hypothetical protein |
| TS29Bac09836/CDS/CDS            | 4.5   | 1.2  | 12.755 | NA | NA | hypothetical protein |
| BactD11680/CDS/CDS              | 4.5   | 1.2  | 12.755 | NA | NA | hypothetical protein |
| EUBREC0736/CDS/electron         | 28.8  | 7.5  | 12.713 | NA | NA | hypothetical protein |
| TS28Ali1057/CDS/CDS             | 96.0  | 25.0 | 12.699 | NA | NA | hypothetical protein |
| TS28Fae21972/CDS/CDS            | 56.3  | 14.7 | 12.683 | NA | NA | hypothetical protein |
| TS28Ali1935/CDS/CDS             | 161.0 | 42.0 | 12.677 | NA | NA | hypothetical protein |
| Ccom1703/CDS/CDS                | 23.0  | 6.0  | 12.677 | NA | NA | hypothetical protein |
| BVU1353/CDS/hypothetical        | 23.0  | 6.0  | 12.677 | NA | NA | hypothetical protein |
| Bdor1989/CDS/CDS                | 23.0  | 6.0  | 12.677 | NA | NA | hypothetical protein |
| TS29Rum20035/CDS/CDS            | 23.0  | 6.0  | 12.677 | NA | NA | hypothetical protein |
| TS28RumUnc1462/CDS/CDS          | 23.0  | 6.0  | 12.677 | NA | NA | hypothetical protein |
| TS29Bac03080/CDS/CDS            | 3.8   | 1.0  | 12.677 | NA | NA | hypothetical protein |
| Bxyl0906/CDS/CDS                | 3.8   | 1.0  | 12.677 | NA | NA | hypothetical protein |

|                                                                   |       |      |        |    |    |                      |
|-------------------------------------------------------------------|-------|------|--------|----|----|----------------------|
| Bcro1215/CDS/CDS                                                  | 3.8   | 1.0  | 12.677 | NA | NA | hypothetical protein |
| BactD11218/CDS/CDS                                                | 3.8   | 1.0  | 12.677 | NA | NA | hypothetical protein |
| TS29Bac12101/CDS/CDS                                              | 3.8   | 1.0  | 12.677 | NA | NA | hypothetical protein |
| BVU3815/CDS/endorpeptidase                                        | 119.5 | 31.3 | 12.612 | NA | NA | hypothetical protein |
| BVU2745/CDS/putative                                              | 38.0  | 10.0 | 12.566 | NA | NA | hypothetical protein |
| TS28Fae13014/CDS/CDS                                              | 57.0  | 15.0 | 12.566 | NA | NA | hypothetical protein |
| TS29Rum17049/CDS/CDS                                              | 9.5   | 2.5  | 12.566 | NA | NA | hypothetical protein |
| TS28Rum15068/CDS/CDS                                              | 9.5   | 2.5  | 12.566 | NA | NA | hypothetical protein |
| TS28Rum06856/CDS/CDS                                              | 9.5   | 2.5  | 12.566 | NA | NA | hypothetical protein |
| TS28Bac8354/CDS/CDS                                               | 19.0  | 5.0  | 12.566 | NA | NA | hypothetical protein |
| TS28Clo02090/CDS/CDS                                              | 19.0  | 5.0  | 12.566 | NA | NA | hypothetical protein |
| TS28Rum00347/CDS/CDS                                              | 34.0  | 9.0  | 12.493 | NA | NA | hypothetical protein |
| TS28Fae03758/CDS/CDS                                              | 7.5   | 2.0  | 12.456 | NA | NA | hypothetical protein |
| BVU1404/CDS/S-adenosyl-methyltransferase                          | 13.2  | 3.5  | 12.440 | NA | NA | hypothetical protein |
| Buni3230/CDS/CDS                                                  | 5.0   | 1.3  | 12.401 | NA | NA | hypothetical protein |
| Msm0854/CDS/hypothetical                                          | 1.3   | 0.3  | 12.401 | NA | NA | hypothetical protein |
| Msm1564/CDS/predicted                                             | 1.3   | 0.3  | 12.401 | NA | NA | hypothetical protein |
| Msm1750297/CDS/CDS                                                | 1.3   | 0.3  | 12.401 | NA | NA | hypothetical protein |
| Msm1750742/CDS/CDS                                                | 1.3   | 0.3  | 12.401 | NA | NA | hypothetical protein |
| Msm0064/CDS/hypothetical                                          | 1.3   | 0.3  | 12.401 | NA | NA | hypothetical protein |
| Bpse1841/CDS/CDS                                                  | 1.3   | 0.3  | 12.401 | NA | NA | hypothetical protein |
| STER1546/CDS/leatoin                                              | 1.3   | 0.3  | 12.401 | NA | NA | hypothetical protein |
| Msm1740353/CDS/CDS                                                | 1.3   | 0.3  | 12.401 | NA | NA | hypothetical protein |
| TS28Bif5273/CDS/CDS                                               | 1.3   | 0.3  | 12.401 | NA | NA | hypothetical protein |
| TS28Bif0036/CDS/CDS                                               | 1.3   | 0.3  | 12.401 | NA | NA | hypothetical protein |
| Msm0712/CDS/hypothetical                                          | 1.3   | 0.3  | 12.401 | NA | NA | hypothetical protein |
| Msm1697/CDS/hypothetical                                          | 1.3   | 0.3  | 12.401 | NA | NA | hypothetical protein |
| Bira31123867/CDS/CDS                                              | 2.5   | 0.7  | 12.401 | NA | NA | hypothetical protein |
| Msm1750398/CDS/CDS                                                | 1.3   | 0.3  | 12.401 | NA | NA | hypothetical protein |
| Bste1198/CDS/CDS                                                  | 15.0  | 4.0  | 12.401 | NA | NA | hypothetical protein |
| TS28RumUnc0628/CDS/CDS                                            | 30.0  | 8.0  | 12.401 | NA | NA | hypothetical protein |
| Aput2153/CDS/CDS                                                  | 7.5   | 2.0  | 12.401 | NA | NA | hypothetical protein |
| TS28Clo02339/CDS/CDS                                              | 15.0  | 4.0  | 12.401 | NA | NA | hypothetical protein |
| TS28Clo02607/CDS/CDS                                              | 15.0  | 4.0  | 12.401 | NA | NA | hypothetical protein |
| Bdor2704/CDS/CDS                                                  | 7.5   | 2.0  | 12.401 | NA | NA | hypothetical protein |
| TS28Fae10484/CDS/CDS                                              | 15.0  | 4.0  | 12.401 | NA | NA | hypothetical protein |
| Bste1678/CDS/CDS                                                  | 15.0  | 4.0  | 12.401 | NA | NA | hypothetical protein |
| Aput0646/CDS/CDS                                                  | 0.6   | 0.2  | 12.381 | NA | NA | hypothetical protein |
| Msm1404/CDS/formate                                               | 24.5  | 6.6  | 12.353 | NA | NA | hypothetical protein |
| TS28Rum11527/CDS/CDS                                              | 1.9   | 0.5  | 12.346 | NA | NA | hypothetical protein |
| Msm0677/CDS/aspartate                                             | 2.8   | 0.8  | 12.346 | NA | NA | hypothetical protein |
| BVU1987/CDS/hypothetical                                          | 9.3   | 2.5  | 12.346 | NA | NA | hypothetical protein |
| Msm1750093/CDS/CDS                                                | 10.3  | 2.8  | 12.326 | NA | NA | hypothetical protein |
| FpraM2120971/CDS/CDS                                              | 13.0  | 3.5  | 12.283 | NA | NA | hypothetical protein |
| TS28Clo02064/CDS/CDS                                              | 137.0 | 37.0 | 12.245 | NA | NA | hypothetical protein |
| Msm1286/CDS/3-octaprenyl-4-hydroxybenzoate                        | 1.2   | 0.3  | 12.236 | NA | NA | hypothetical protein |
| TS28Aii0452/CDS/CDS                                               | 48.0  | 13.0 | 12.210 | NA | NA | hypothetical protein |
| TS28Aii1227/CDS/CDS                                               | 81.0  | 22.0 | 12.176 | NA | NA | hypothetical protein |
| Msm0765/CDS/pyruvate                                              | 7.7   | 2.1  | 12.170 | NA | NA | hypothetical protein |
| BVU3440/CDS/hypothetical                                          | 3.7   | 1.0  | 12.125 | NA | NA | hypothetical protein |
| Cspi0974/CDS/CDS                                                  | 3.7   | 1.0  | 12.125 | NA | NA | hypothetical protein |
| Msm1750728/CDS/CDS                                                | 0.9   | 0.3  | 12.125 | NA | NA | hypothetical protein |
| TS29Bac11215/CDS/CDS                                              | 11.0  | 3.0  | 12.125 | NA | NA | hypothetical protein |
| Dlon0618/CDS/CDS                                                  | 5.5   | 1.5  | 12.125 | NA | NA | hypothetical protein |
| Bste2550/CDS/CDS                                                  | 11.0  | 3.0  | 12.125 | NA | NA | hypothetical protein |
| Rtor1585/CDS/CDS                                                  | 11.0  | 3.0  | 12.125 | NA | NA | hypothetical protein |
| TS28Bac1125/CDS/CDS                                               | 11.0  | 3.0  | 12.125 | NA | NA | hypothetical protein |
| TS28Bac6257/CDS/CDS                                               | 11.0  | 3.0  | 12.125 | NA | NA | hypothetical protein |
| TS29Rum20803/CDS/CDS                                              | 11.0  | 3.0  | 12.125 | NA | NA | hypothetical protein |
| FpraM2120995/CDS/CDS                                              | 11.0  | 3.0  | 12.125 | NA | NA | hypothetical protein |
| Aco13854/CDS/CDS                                                  | 11.0  | 3.0  | 12.125 | NA | NA | hypothetical protein |
| TS28RumUnc1175/CDS/CDS                                            | 11.0  | 3.0  | 12.125 | NA | NA | hypothetical protein |
| TS29Rum01328/CDS/CDS                                              | 11.0  | 3.0  | 12.125 | NA | NA | hypothetical protein |
| TS29Rum13036/CDS/CDS                                              | 11.0  | 3.0  | 12.125 | NA | NA | hypothetical protein |
| TS29Fae08172/CDS/CDS                                              | 5.5   | 1.5  | 12.125 | NA | NA | hypothetical protein |
| M23Ape48/CDS/Pyruvate.phosphate                                   | 11.0  | 3.0  | 12.125 | NA | NA | hypothetical protein |
| TS28Fae04521/CDS/CDS                                              | 22.0  | 6.0  | 12.125 | NA | NA | hypothetical protein |
| Bdor0160/CDS/CDS                                                  | 5.5   | 1.5  | 12.125 | NA | NA | hypothetical protein |
| TS29Rum15040/CDS/CDS                                              | 11.0  | 3.0  | 12.125 | NA | NA | hypothetical protein |
| TS29Eub0873/CDS/CDS                                               | 22.0  | 6.0  | 12.125 | NA | NA | hypothetical protein |
| TS28Fae09935/CDS/CDS                                              | 11.0  | 3.0  | 12.125 | NA | NA | hypothetical protein |
| TS28Par2261/CDS/CDS                                               | 11.0  | 3.0  | 12.125 | NA | NA | hypothetical protein |
| TS28Rum13928/CDS/CDS                                              | 7.3   | 2.0  | 12.125 | NA | NA | hypothetical protein |
| BL1160/CDS/peptide                                                | 3.7   | 1.0  | 12.125 | NA | NA | hypothetical protein |
| TS28Fae21066/CDS/CDS                                              | 21.9  | 6.0  | 12.052 | NA | NA | hypothetical protein |
| BVU2367/CDS/putative                                              | 65.5  | 18.0 | 12.034 | NA | NA | hypothetical protein |
| TS29Bac10371/CDS/CDS                                              | 13.3  | 3.7  | 12.025 | NA | NA | hypothetical protein |
| BWH21673/CDS/CDS                                                  | 4.8   | 1.3  | 11.988 | NA | NA | hypothetical protein |
| BFnctc1734/CDS/hypothetical                                       | 4.8   | 1.3  | 11.988 | NA | NA | hypothetical protein |
| TS28Rum01944/CDS/CDS                                              | 58.0  | 16.0 | 11.988 | NA | NA | hypothetical protein |
| TS29Bac09289/CDS/CDS                                              | 14.5  | 4.0  | 11.988 | NA | NA | hypothetical protein |
| Msm0506/CDS/5-aminoimidazole-4-carboxamide-1-beta-D-ribofuranosyl | 12.7  | 3.5  | 11.968 | NA | NA | hypothetical protein |
| TS28Met0529/CDS/CDS                                               | 79.4  | 22.0 | 11.930 | NA | NA | hypothetical protein |
| HPAG10119/CDS/hypothetical                                        | 1.2   | 0.3  | 11.905 | NA | NA | hypothetical protein |
| Bxyl4378/CDS/CDS                                                  | 3.0   | 0.8  | 11.905 | NA | NA | hypothetical protein |
| TS28Aii0326/CDS/CDS                                               | 36.0  | 10.0 | 11.905 | NA | NA | hypothetical protein |
| TS28Col0872/CDS/CDS                                               | 18.0  | 5.0  | 11.905 | NA | NA | hypothetical protein |
| TS28Clo06585/CDS/CDS                                              | 18.0  | 5.0  | 11.905 | NA | NA | hypothetical protein |
| Msm0704/CDS/translation                                           | 4.5   | 1.3  | 11.905 | NA | NA | hypothetical protein |
| TS28Clo02048/CDS/CDS                                              | 108.0 | 30.0 | 11.905 | NA | NA | hypothetical protein |
| Msm0919/CDS/triisophosphate                                       | 0.9   | 0.3  | 11.905 | NA | NA | hypothetical protein |

|                                 |       |      |        |    |    |                      |
|---------------------------------|-------|------|--------|----|----|----------------------|
| Bumi0291 CDS CDS                | 3.0   | 0.8  | 11.905 | NA | NA | hypothetical protein |
| TS28Bac1538 CDS CDS             | 3.0   | 0.8  | 11.905 | NA | NA | hypothetical protein |
| TS29Bac11275 CDS CDS            | 13.8  | 3.8  | 11.891 | NA | NA | hypothetical protein |
| BVU2319 CDS xylulose            | 7.2   | 2.0  | 11.850 | NA | NA | hypothetical protein |
| BVU1927 CDS aminoacyl-histidine | 12.5  | 3.5  | 11.810 | NA | NA | hypothetical protein |
| TS29Rum13035 CDS CDS            | 25.0  | 7.0  | 11.810 | NA | NA | hypothetical protein |
| TS28Met0241 CDS CDS             | 8.3   | 2.3  | 11.810 | NA | NA | hypothetical protein |
| BLD1015 CDS hypothetical        | 2.1   | 0.6  | 11.810 | NA | NA | hypothetical protein |
| FrnaM2120511 CDS CDS            | 3.0   | 0.8  | 11.773 | NA | NA | hypothetical protein |
| BVU2612 CDS preprotein          | 32.0  | 9.0  | 11.758 | NA | NA | hypothetical protein |
| TS28Fae14026 CDS CDS            | 145.5 | 41.0 | 11.736 | NA | NA | hypothetical protein |
| BVU1157 CDS putative            | 56.3  | 16.0 | 11.643 | NA | NA | hypothetical protein |
| Aput0648 CDS CDS                | 0.5   | 0.2  | 11.594 | NA | NA | hypothetical protein |
| BVU2340 CDS hypothetical        | 59.5  | 17.0 | 11.574 | NA | NA | hypothetical protein |
| TS28Rum07220 CDS CDS            | 3.5   | 1.0  | 11.574 | NA | NA | hypothetical protein |
| BactD23789 CDS CDS              | 1.8   | 0.5  | 11.574 | NA | NA | hypothetical protein |
| b3038 CDS predicted             | 3.5   | 1.0  | 11.574 | NA | NA | hypothetical protein |
| TS28Eub4356 CDS CDS             | 3.5   | 1.0  | 11.574 | NA | NA | hypothetical protein |
| Bdor0502 CDS CDS                | 21.0  | 6.0  | 11.574 | NA | NA | hypothetical protein |
| TS29Rum01499 CDS CDS            | 14.0  | 4.0  | 11.574 | NA | NA | hypothetical protein |
| Bste0766 CDS CDS                | 7.0   | 2.0  | 11.574 | NA | NA | hypothetical protein |
| TS28Par2433 CDS CDS             | 3.5   | 1.0  | 11.574 | NA | NA | hypothetical protein |
| Msm1055 CDS coenzym             | 3.5   | 1.0  | 11.574 | NA | NA | hypothetical protein |
| TS28Clo02431 CDS CDS            | 14.0  | 4.0  | 11.574 | NA | NA | hypothetical protein |
| TS28Clo02072 CDS CDS            | 14.0  | 4.0  | 11.574 | NA | NA | hypothetical protein |
| Pmer2612 CDS CDS                | 7.0   | 2.0  | 11.574 | NA | NA | hypothetical protein |
| Cbar0305 CDS CDS                | 7.0   | 2.0  | 11.574 | NA | NA | hypothetical protein |
| TS29Fae05910 CDS CDS            | 3.5   | 1.0  | 11.574 | NA | NA | hypothetical protein |
| TS28Clo08419 CDS CDS            | 7.0   | 2.0  | 11.574 | NA | NA | hypothetical protein |
| Bpse0864 CDS CDS                | 7.0   | 2.0  | 11.574 | NA | NA | hypothetical protein |
| TS28Clo07310 CDS CDS            | 21.0  | 6.0  | 11.574 | NA | NA | hypothetical protein |
| TS29Bac10054 CDS CDS            | 3.5   | 1.0  | 11.574 | NA | NA | hypothetical protein |
| TS28Ali1230 CDS CDS             | 7.0   | 2.0  | 11.574 | NA | NA | hypothetical protein |
| TS28Rum07214 CDS CDS            | 3.5   | 1.0  | 11.574 | NA | NA | hypothetical protein |
| TS28Clo06590 CDS CDS            | 7.0   | 2.0  | 11.574 | NA | NA | hypothetical protein |
| TS28Rum06945 CDS CDS            | 7.0   | 2.0  | 11.574 | NA | NA | hypothetical protein |
| TS28Fae10797 CDS CDS            | 10.5  | 3.0  | 11.574 | NA | NA | hypothetical protein |
| Csci3403 CDS CDS                | 3.5   | 1.0  | 11.574 | NA | NA | hypothetical protein |
| Bxyl3820 CDS CDS                | 1.8   | 0.5  | 11.574 | NA | NA | hypothetical protein |
| b3247 CDS ribonuclease          | 7.0   | 2.0  | 11.574 | NA | NA | hypothetical protein |
| Bste3163 CDS CDS                | 3.5   | 1.0  | 11.574 | NA | NA | hypothetical protein |
| TS28Par1622 CDS CDS             | 3.5   | 1.0  | 11.574 | NA | NA | hypothetical protein |
| BactD23409 CDS CDS              | 3.5   | 1.0  | 11.574 | NA | NA | hypothetical protein |
| TS28Bac7667 CDS CDS             | 3.5   | 1.0  | 11.574 | NA | NA | hypothetical protein |
| Pmer1296 CDS CDS                | 3.5   | 1.0  | 11.574 | NA | NA | hypothetical protein |
| b2319 CDS predicted             | 3.5   | 1.0  | 11.574 | NA | NA | hypothetical protein |
| BDI3889 CDS conserved           | 3.5   | 1.0  | 11.574 | NA | NA | hypothetical protein |
| Msm0883 CDS sorbitate           | 3.5   | 1.0  | 11.574 | NA | NA | hypothetical protein |
| ShigspD91340 CDS CDS            | 3.5   | 1.0  | 11.574 | NA | NA | hypothetical protein |
| TS29Bac07957 CDS CDS            | 3.5   | 1.0  | 11.574 | NA | NA | hypothetical protein |
| Cbar0569 CDS CDS                | 7.0   | 2.0  | 11.574 | NA | NA | hypothetical protein |
| Pmer3064 CDS CDS                | 3.5   | 1.0  | 11.574 | NA | NA | hypothetical protein |
| EUBREC2228 CDS RecA             | 3.5   | 1.0  | 11.574 | NA | NA | hypothetical protein |
| TS28Fae04866 CDS CDS            | 14.0  | 4.0  | 11.574 | NA | NA | hypothetical protein |
| BVU0543 CDS putative            | 56.0  | 16.0 | 11.574 | NA | NA | hypothetical protein |
| Msmi741494 CDS CDS              | 1.8   | 0.5  | 11.574 | NA | NA | hypothetical protein |
| ShigspD9249 CDS CDS             | 3.5   | 1.0  | 11.574 | NA | NA | hypothetical protein |
| TS29Fae05171 CDS CDS            | 7.0   | 2.0  | 11.574 | NA | NA | hypothetical protein |
| TS28Met1224 CDS CDS             | 1.8   | 0.5  | 11.574 | NA | NA | hypothetical protein |
| Rtor2091 CDS CDS                | 3.5   | 1.0  | 11.574 | NA | NA | hypothetical protein |
| TS29Fae00175 CDS CDS            | 3.5   | 1.0  | 11.574 | NA | NA | hypothetical protein |
| b1268 CDS predicted             | 3.5   | 1.0  | 11.574 | NA | NA | hypothetical protein |
| TS28Ali0014 CDS CDS             | 7.0   | 2.0  | 11.574 | NA | NA | hypothetical protein |
| EUBREC3100 CDS mrp              | 7.0   | 2.0  | 11.574 | NA | NA | hypothetical protein |
| Bean2089 CDS CDS                | 7.0   | 2.0  | 11.574 | NA | NA | hypothetical protein |
| TS28Bif1396 CDS CDS             | 7.0   | 2.0  | 11.574 | NA | NA | hypothetical protein |
| TS28Fae01893 CDS CDS            | 3.5   | 1.0  | 11.574 | NA | NA | hypothetical protein |
| TS28Fae08306 CDS CDS            | 7.0   | 2.0  | 11.574 | NA | NA | hypothetical protein |
| Eeli1338 CDS CDS                | 7.0   | 2.0  | 11.574 | NA | NA | hypothetical protein |
| TS29Bac06322 CDS CDS            | 1.8   | 0.5  | 11.574 | NA | NA | hypothetical protein |
| Msm0686 CDS acetolactate        | 3.5   | 1.0  | 11.574 | NA | NA | hypothetical protein |
| Dfor0628 CDS CDS                | 7.0   | 2.0  | 11.574 | NA | NA | hypothetical protein |
| TS29Bac10900 CDS CDS            | 7.0   | 2.0  | 11.574 | NA | NA | hypothetical protein |
| EUBREC1905 CDS DnaJ             | 10.5  | 3.0  | 11.574 | NA | NA | hypothetical protein |
| Bste2231 CDS CDS                | 7.0   | 2.0  | 11.574 | NA | NA | hypothetical protein |
| TS28Fae19886 CDS CDS            | 7.0   | 2.0  | 11.574 | NA | NA | hypothetical protein |
| TS28Rum13721 CDS CDS            | 14.0  | 4.0  | 11.574 | NA | NA | hypothetical protein |
| HPAG11529 CDS undecaprenyl      | 3.5   | 1.0  | 11.574 | NA | NA | hypothetical protein |
| Even0032 CDS CDS                | 7.0   | 2.0  | 11.574 | NA | NA | hypothetical protein |
| TS29Bac07809 CDS CDS            | 3.5   | 1.0  | 11.574 | NA | NA | hypothetical protein |
| Bbre1603 CDS CDS                | 7.0   | 2.0  | 11.574 | NA | NA | hypothetical protein |
| Bxyl0626 CDS CDS                | 3.5   | 1.0  | 11.574 | NA | NA | hypothetical protein |
| TS28Par0598 CDS CDS             | 7.0   | 2.0  | 11.574 | NA | NA | hypothetical protein |
| Bumi3484 CDS CDS                | 3.5   | 1.0  | 11.574 | NA | NA | hypothetical protein |
| Msmi741490 CDS CDS              | 1.8   | 0.5  | 11.574 | NA | NA | hypothetical protein |
| TS28Bac7738 CDS CDS             | 7.0   | 2.0  | 11.574 | NA | NA | hypothetical protein |
| Dfor1505 CDS CDS                | 7.0   | 2.0  | 11.574 | NA | NA | hypothetical protein |
| TS28Bac6422 CDS CDS             | 3.5   | 1.0  | 11.574 | NA | NA | hypothetical protein |
| TS28Par0725 CDS CDS             | 3.5   | 1.0  | 11.574 | NA | NA | hypothetical protein |
| TS29Bac04313 CDS CDS            | 7.0   | 2.0  | 11.574 | NA | NA | hypothetical protein |
| TS29Bac04216 CDS CDS            | 14.0  | 4.0  | 11.574 | NA | NA | hypothetical protein |
| TS28Fae19390 CDS CDS            | 7.0   | 2.0  | 11.574 | NA | NA | hypothetical protein |

|                                   |       |      |        |    |    |                      |
|-----------------------------------|-------|------|--------|----|----|----------------------|
| Aco1288 CDS CDS                   | 7.0   | 2.0  | 11.574 | NA | NA | hypothetical protein |
| TS28Rum04826 CDS CDS              | 7.0   | 2.0  | 11.574 | NA | NA | hypothetical protein |
| TS28Ali1378 CDS CDS               | 7.0   | 2.0  | 11.574 | NA | NA | hypothetical protein |
| TS28Rum16145 CDS CDS              | 3.5   | 1.0  | 11.574 | NA | NA | hypothetical protein |
| RintL12691 CDS CDS                | 7.0   | 2.0  | 11.574 | NA | NA | hypothetical protein |
| Cbar1947 CDS CDS                  | 7.0   | 2.0  | 11.574 | NA | NA | hypothetical protein |
| TS28Par2008 CDS CDS               | 3.5   | 1.0  | 11.574 | NA | NA | hypothetical protein |
| Msm0659 CDS hypothetical          | 1.8   | 0.5  | 11.574 | NA | NA | hypothetical protein |
| TS28Fac15131 CDS CDS              | 7.0   | 2.0  | 11.574 | NA | NA | hypothetical protein |
| TS29Rum05175 CDS CDS              | 7.0   | 2.0  | 11.574 | NA | NA | hypothetical protein |
| TS28Col0173 CDS CDS               | 7.0   | 2.0  | 11.574 | NA | NA | hypothetical protein |
| Bxv14218 CDS CDS                  | 3.5   | 1.0  | 11.574 | NA | NA | hypothetical protein |
| BT1103 CDS RNA                    | 1.8   | 0.5  | 11.574 | NA | NA | hypothetical protein |
| BVU0251 CDS glutamate             | 70.7  | 20.5 | 11.410 | NA | NA | hypothetical protein |
| BactD12781 CDS CDS                | 6.9   | 2.0  | 11.397 | NA | NA | hypothetical protein |
| Msm1625 CDS thiol: fumarate       | 4.6   | 1.3  | 11.368 | NA | NA | hypothetical protein |
| Bum0658 CDS CDS                   | 10.3  | 3.0  | 11.358 | NA | NA | hypothetical protein |
| Msmi740223 CDS CDS                | 2.0   | 0.6  | 11.338 | NA | NA | hypothetical protein |
| Msmi751456 CDS CDS                | 2.0   | 0.6  | 11.338 | NA | NA | hypothetical protein |
| BVU13241 CDS phosphoserine        | 37.7  | 11.0 | 11.324 | NA | NA | hypothetical protein |
| BVU0016 CDS two-component         | 133.5 | 39.0 | 11.320 | NA | NA | hypothetical protein |
| BVU3907 CDS hypothetical          | 32.5  | 9.5  | 11.313 | NA | NA | hypothetical protein |
| TS28Col0352 CDS CDS               | 54.7  | 16.0 | 11.299 | NA | NA | hypothetical protein |
| Bste1338 CDS CDS                  | 51.0  | 15.0 | 11.244 | NA | NA | hypothetical protein |
| EUBREC3019 CDS hypothetical       | 17.0  | 5.0  | 11.244 | NA | NA | hypothetical protein |
| TS28Fac13589 CDS CDS              | 17.0  | 5.0  | 11.244 | NA | NA | hypothetical protein |
| BVU0988 CDS 2-amino-3-ketobutrate | 59.5  | 17.5 | 11.244 | NA | NA | hypothetical protein |
| Msm1529 CDS putative              | 8.5   | 2.5  | 11.244 | NA | NA | hypothetical protein |
| BVU0981 CDS 2-amino-3-ketobutrate | 59.5  | 17.5 | 11.244 | NA | NA | hypothetical protein |
| TS28Fac06397 CDS CDS              | 17.0  | 5.0  | 11.244 | NA | NA | hypothetical protein |
| BFych462845 CDS hypothetical      | 10.7  | 3.2  | 11.209 | NA | NA | hypothetical protein |
| TS28Ali0298 CDS CDS               | 88.0  | 26.0 | 11.193 | NA | NA | hypothetical protein |
| TS28Rum10997 CDS CDS              | 27.0  | 8.0  | 11.161 | NA | NA | hypothetical protein |
| TS28Fac19847 CDS CDS              | 6.8   | 2.0  | 11.161 | NA | NA | hypothetical protein |
| TS28Clo08465 CDS CDS              | 27.0  | 8.0  | 11.161 | NA | NA | hypothetical protein |
| TS28Par0404 CDS CDS               | 13.5  | 4.0  | 11.161 | NA | NA | hypothetical protein |
| Msm0707 CDS predicted             | 4.2   | 1.3  | 11.111 | NA | NA | hypothetical protein |
| TS28Ali1354 CDS CDS               | 84.0  | 25.0 | 11.111 | NA | NA | hypothetical protein |
| TS28Bac6680 CDS CDS               | 70.5  | 21.0 | 11.102 | NA | NA | hypothetical protein |
| BVU0799 CDS 30S                   | 66.5  | 19.8 | 11.091 | NA | NA | hypothetical protein |
| Msmi740013 CDS CDS                | 8.9   | 2.7  | 11.058 | NA | NA | hypothetical protein |
| Msmi741320 CDS CDS                | 1.7   | 0.5  | 11.023 | NA | NA | hypothetical protein |
| Bxv10905 CDS CDS                  | 1.7   | 0.5  | 11.023 | NA | NA | hypothetical protein |
| Msmi751577 CDS CDS                | 3.3   | 1.0  | 11.023 | NA | NA | hypothetical protein |
| Bint2002 CDS CDS                  | 3.3   | 1.0  | 11.023 | NA | NA | hypothetical protein |
| Pmer3221 CDS CDS                  | 10.0  | 3.0  | 11.023 | NA | NA | hypothetical protein |
| TS28Fac00145 CDS CDS              | 10.0  | 3.0  | 11.023 | NA | NA | hypothetical protein |
| BactD1315 CDS CDS                 | 1.7   | 0.5  | 11.023 | NA | NA | hypothetical protein |
| TS28Rum13199 CDS CDS              | 10.0  | 3.0  | 11.023 | NA | NA | hypothetical protein |
| TS28Rum13115 CDS CDS              | 5.0   | 1.5  | 11.023 | NA | NA | hypothetical protein |
| TS28RumUnc1425 CDS CDS            | 10.0  | 3.0  | 11.023 | NA | NA | hypothetical protein |
| Bxv11368 CDS CDS                  | 1.7   | 0.5  | 11.023 | NA | NA | hypothetical protein |
| Even1782 CDS CDS                  | 20.0  | 6.0  | 11.023 | NA | NA | hypothetical protein |
| FpraM2120422 CDS CDS              | 1.7   | 0.5  | 11.023 | NA | NA | hypothetical protein |
| BVU2994 CDS ATP                   | 10.0  | 3.0  | 11.023 | NA | NA | hypothetical protein |
| TS29Bif3258 CDS CDS               | 5.0   | 1.5  | 11.023 | NA | NA | hypothetical protein |
| TS28Fac10978 CDS CDS              | 10.0  | 3.0  | 11.023 | NA | NA | hypothetical protein |
| CspM6210548 CDS CDS               | 3.3   | 1.0  | 11.023 | NA | NA | hypothetical protein |
| TS29Rum03114 CDS CDS              | 10.0  | 3.0  | 11.023 | NA | NA | hypothetical protein |
| stu0164 CDS ABC                   | 1.7   | 0.5  | 11.023 | NA | NA | hypothetical protein |
| BactD10434 CDS CDS                | 5.0   | 1.5  | 11.023 | NA | NA | hypothetical protein |
| b2996 CDS hydrogenase             | 3.3   | 1.0  | 11.023 | NA | NA | hypothetical protein |
| CspSS21448 CDS CDS                | 5.0   | 1.5  | 11.023 | NA | NA | hypothetical protein |
| TS29Bac07908 CDS CDS              | 5.0   | 1.5  | 11.023 | NA | NA | hypothetical protein |
| BLD0921 CDS MalE-type             | 10.0  | 3.0  | 11.023 | NA | NA | hypothetical protein |
| TS28Rum13096 CDS CDS              | 10.0  | 3.0  | 11.023 | NA | NA | hypothetical protein |
| Bste2906 CDS CDS                  | 5.0   | 1.5  | 11.023 | NA | NA | hypothetical protein |
| TS28Rum06350 CDS CDS              | 10.0  | 3.0  | 11.023 | NA | NA | hypothetical protein |
| TS29Par836 CDS CDS                | 5.0   | 1.5  | 11.023 | NA | NA | hypothetical protein |
| Eeli1384 CDS CDS                  | 10.0  | 3.0  | 11.023 | NA | NA | hypothetical protein |
| TS29Fac03142 CDS CDS              | 5.0   | 1.5  | 11.023 | NA | NA | hypothetical protein |
| TS28Bac8124 CDS CDS               | 10.0  | 3.0  | 11.023 | NA | NA | hypothetical protein |
| TS28Ali1145 CDS CDS               | 10.0  | 3.0  | 11.023 | NA | NA | hypothetical protein |
| Msm1781 CDS hypothetical          | 6.7   | 2.0  | 11.023 | NA | NA | hypothetical protein |
| Bdor1537 CDS CDS                  | 5.0   | 1.5  | 11.023 | NA | NA | hypothetical protein |
| TS28Bif4659 CDS CDS               | 5.0   | 1.5  | 11.023 | NA | NA | hypothetical protein |
| TS28Ali0094 CDS CDS               | 40.0  | 12.0 | 11.023 | NA | NA | hypothetical protein |
| TS28Clo02517 CDS CDS              | 10.0  | 3.0  | 11.023 | NA | NA | hypothetical protein |
| str0164 CDS ABC                   | 1.7   | 0.5  | 11.023 | NA | NA | hypothetical protein |
| Aput0975 CDS CDS                  | 10.0  | 3.0  | 11.023 | NA | NA | hypothetical protein |
| Aput0549 CDS CDS                  | 10.0  | 3.0  | 11.023 | NA | NA | hypothetical protein |
| Bdor1552 CDS CDS                  | 30.0  | 9.0  | 11.023 | NA | NA | hypothetical protein |
| TS28Bac6889 CDS CDS               | 10.0  | 3.0  | 11.023 | NA | NA | hypothetical protein |
| BVU2268 CDS hypothetical          | 11.7  | 3.5  | 11.023 | NA | NA | hypothetical protein |
| EFER3760 CDS thiamin              | 3.3   | 1.0  | 11.023 | NA | NA | hypothetical protein |
| TS29Eub2143 CDS CDS               | 3.3   | 1.0  | 11.023 | NA | NA | hypothetical protein |
| BactD22959 CDS CDS                | 3.3   | 1.0  | 11.023 | NA | NA | hypothetical protein |
| TS28Clo0339 CDS CDS               | 3.3   | 1.0  | 11.023 | NA | NA | hypothetical protein |
| Bado0890 CDS CDS                  | 1.7   | 0.5  | 11.023 | NA | NA | hypothetical protein |
| STER1622 CDS pyruvate             | 1.7   | 0.5  | 11.023 | NA | NA | hypothetical protein |
| Msm0620 CDS 50S                   | 3.1   | 0.9  | 11.003 | NA | NA | hypothetical protein |
| TS28Met1808 CDS CDS               | 3.1   | 0.9  | 11.003 | NA | NA | hypothetical protein |

|                                          |       |      |        |    |    |                      |
|------------------------------------------|-------|------|--------|----|----|----------------------|
| Msm1337/CDS/serine                       | 6.7   | 2.0  | 10.996 | NA | NA | hypothetical protein |
| Bdor3601/CDS/CDS                         | 22.2  | 6.7  | 10.996 | NA | NA | hypothetical protein |
| EUBREC0477/CDS/galactose/glucose-binding | 18.3  | 5.5  | 10.973 | NA | NA | hypothetical protein |
| TS28Ali2375/CDS/CDS                      | 63.0  | 19.0 | 10.965 | NA | NA | hypothetical protein |
| BVU2537/CDS/chorismate                   | 54.7  | 16.5 | 10.956 | NA | NA | hypothetical protein |
| Msm1152/CDS/hypothetical                 | 4.4   | 1.3  | 10.954 | NA | NA | hypothetical protein |
| Bdor3069/CDS/CDS                         | 21.5  | 6.5  | 10.938 | NA | NA | hypothetical protein |
| Bthe3733474/CDS/CDS                      | 6.6   | 2.0  | 10.913 | NA | NA | hypothetical protein |
| Bcopron2838/CDS/CDS                      | 6.6   | 2.0  | 10.913 | NA | NA | hypothetical protein |
| TS29Fae06535/CDS/CDS                     | 3.3   | 1.0  | 10.913 | NA | NA | hypothetical protein |
| Robe1900/CDS/CDS                         | 61.0  | 18.5 | 10.904 | NA | NA | hypothetical protein |
| BL1799/CDS/hypothetical                  | 3.8   | 1.2  | 10.866 | NA | NA | hypothetical protein |
| Bste1394/CDS/CDS                         | 16.4  | 5.0  | 10.847 | NA | NA | hypothetical protein |
| TS29Bac11470/CDS/CDS                     | 4.9   | 1.5  | 10.839 | NA | NA | hypothetical protein |
| BactD13580/CDS/CDS                       | 4.9   | 1.5  | 10.839 | NA | NA | hypothetical protein |
| Bple1077/CDS/CDS                         | 3.9   | 1.2  | 10.839 | NA | NA | hypothetical protein |
| BWH21661/CDS/CDS                         | 3.9   | 1.2  | 10.839 | NA | NA | hypothetical protein |
| Bcoproc0096/CDS/CDS                      | 3.9   | 1.2  | 10.839 | NA | NA | hypothetical protein |
| Bcoproc0192/CDS/CDS                      | 3.9   | 1.2  | 10.839 | NA | NA | hypothetical protein |
| BVU2329/CDS/chanerone                    | 24.5  | 7.5  | 10.803 | NA | NA | hypothetical protein |
| TS28Met1053/CDS/CDS                      | 9.3   | 2.8  | 10.796 | NA | NA | hypothetical protein |
| BactD23268/CDS/CDS                       | 9.8   | 3.0  | 10.748 | NA | NA | hypothetical protein |
| TS28Rum03768/CDS/CDS                     | 6.5   | 2.0  | 10.748 | NA | NA | hypothetical protein |
| TS28Bac8382/CDS/CDS                      | 6.5   | 2.0  | 10.748 | NA | NA | hypothetical protein |
| TS28Fae12196/CDS/CDS                     | 3.3   | 1.0  | 10.748 | NA | NA | hypothetical protein |
| Ehal1458/CDS/CDS                         | 13.0  | 4.0  | 10.748 | NA | NA | hypothetical protein |
| TS29Fae01275/CDS/CDS                     | 13.0  | 4.0  | 10.748 | NA | NA | hypothetical protein |
| BVU3860/CDS/glycosyltransferase          | 6.5   | 2.0  | 10.748 | NA | NA | hypothetical protein |
| TS28Clo5849/CDS/CDS                      | 13.0  | 4.0  | 10.748 | NA | NA | hypothetical protein |
| Bova3645/CDS/CDS                         | 6.5   | 2.0  | 10.748 | NA | NA | hypothetical protein |
| Ehal1995/CDS/CDS                         | 6.5   | 2.0  | 10.748 | NA | NA | hypothetical protein |
| BVU3635/CDS/50S                          | 6.5   | 2.0  | 10.748 | NA | NA | hypothetical protein |
| Bdor2130/CDS/CDS                         | 6.5   | 2.0  | 10.748 | NA | NA | hypothetical protein |
| M23Apea881/CDS/Translation               | 6.5   | 2.0  | 10.748 | NA | NA | hypothetical protein |
| TS28Bac7712/CDS/CDS                      | 6.5   | 2.0  | 10.748 | NA | NA | hypothetical protein |
| Bdor2614/CDS/CDS                         | 6.5   | 2.0  | 10.748 | NA | NA | hypothetical protein |
| TS29Rum01213/CDS/CDS                     | 13.0  | 4.0  | 10.748 | NA | NA | hypothetical protein |
| Msm1713/CDS/predicted                    | 1.1   | 0.3  | 10.748 | NA | NA | hypothetical protein |
| Msmi740739/CDS/CDS                       | 6.8   | 2.1  | 10.714 | NA | NA | hypothetical protein |
| Bova0264/CDS/CDS                         | 4.9   | 1.5  | 10.692 | NA | NA | hypothetical protein |
| BactD23742/CDS/CDS                       | 4.9   | 1.5  | 10.692 | NA | NA | hypothetical protein |
| TS28Bac8216/CDS/CDS                      | 32.3  | 10.0 | 10.692 | NA | NA | hypothetical protein |
| Msm0997/CDS/dihydroorotase               | 7.0   | 2.2  | 10.684 | NA | NA | hypothetical protein |
| TS28Bac6866/CDS/CDS                      | 54.3  | 16.8 | 10.674 | NA | NA | hypothetical protein |
| Bdor3225/CDS/CDS                         | 64.5  | 20.0 | 10.665 | NA | NA | hypothetical protein |
| TS28Rum03202/CDS/CDS                     | 6.4   | 2.0  | 10.610 | NA | NA | hypothetical protein |
| Msm0561/CDS/formate                      | 6.4   | 2.0  | 10.610 | NA | NA | hypothetical protein |
| TS28Par2305/CDS/CDS                      | 8.0   | 2.5  | 10.582 | NA | NA | hypothetical protein |
| Msm0307/CDS/sugar                        | 1.6   | 0.5  | 10.582 | NA | NA | hypothetical protein |
| BactD21983/CDS/CDS                       | 8.0   | 2.5  | 10.582 | NA | NA | hypothetical protein |
| BFych462788/CDS/tyrosine                 | 0.8   | 0.3  | 10.582 | NA | NA | hypothetical protein |
| Bova2652/CDS/CDS                         | 8.0   | 2.5  | 10.582 | NA | NA | hypothetical protein |
| TS28Par2453/CDS/CDS                      | 8.0   | 2.5  | 10.582 | NA | NA | hypothetical protein |
| TS28Bif0948/CDS/CDS                      | 2.7   | 0.8  | 10.582 | NA | NA | hypothetical protein |
| Bpse1839/CDS/CDS                         | 2.7   | 0.8  | 10.582 | NA | NA | hypothetical protein |
| Msm0102/CDS/methionine                   | 5.3   | 1.7  | 10.582 | NA | NA | hypothetical protein |
| Msmi751507/CDS/CDS                       | 4.3   | 1.3  | 10.541 | NA | NA | hypothetical protein |
| TS29Bac03564/CDS/CDS                     | 4.3   | 1.3  | 10.541 | NA | NA | hypothetical protein |
| Bova2164/CDS/CDS                         | 4.3   | 1.3  | 10.541 | NA | NA | hypothetical protein |
| Bxvl2122/CDS/CDS                         | 4.3   | 1.3  | 10.541 | NA | NA | hypothetical protein |
| TS28Ali1642/CDS/CDS                      | 51.0  | 16.0 | 10.541 | NA | NA | hypothetical protein |
| Rena0966/CDS/CDS                         | 3.7   | 1.2  | 10.528 | NA | NA | hypothetical protein |
| BVU2762/CDS/hypothetical                 | 17.5  | 5.5  | 10.522 | NA | NA | hypothetical protein |
| TS28Ali2243/CDS/CDS                      | 35.0  | 11.0 | 10.522 | NA | NA | hypothetical protein |
| Msm1626/CDS/predicted                    | 1.9   | 0.6  | 10.488 | NA | NA | hypothetical protein |
| Msm1174/CDS/heat                         | 3.2   | 1.0  | 10.472 | NA | NA | hypothetical protein |
| b3902/CDS/rhamnulose-1-phosphate         | 3.2   | 1.0  | 10.472 | NA | NA | hypothetical protein |
| TS28Fae00848/CDS/CDS                     | 9.5   | 3.0  | 10.472 | NA | NA | hypothetical protein |
| TS28Par2283/CDS/CDS                      | 9.5   | 3.0  | 10.472 | NA | NA | hypothetical protein |
| TS28Dor0805/CDS/CDS                      | 38.0  | 12.0 | 10.472 | NA | NA | hypothetical protein |
| TS28Bac0256/CDS/CDS                      | 9.5   | 3.0  | 10.472 | NA | NA | hypothetical protein |
| Pmer0600/CDS/CDS                         | 19.0  | 6.0  | 10.472 | NA | NA | hypothetical protein |
| TS28Clo08427/CDS/CDS                     | 19.0  | 6.0  | 10.472 | NA | NA | hypothetical protein |
| L0368/CDS/elongation                     | 3.2   | 1.0  | 10.472 | NA | NA | hypothetical protein |
| TS28Rum14110/CDS/CDS                     | 19.0  | 6.0  | 10.472 | NA | NA | hypothetical protein |
| Msm0427/CDS/DNA                          | 6.3   | 2.0  | 10.472 | NA | NA | hypothetical protein |
| TS28Clo03127/CDS/CDS                     | 98.0  | 31.0 | 10.454 | NA | NA | hypothetical protein |
| Msmi751277/CDS/CDS                       | 3.7   | 1.2  | 10.440 | NA | NA | hypothetical protein |
| TS28Ali0766/CDS/CDS                      | 101.0 | 32.0 | 10.438 | NA | NA | hypothetical protein |
| BVU2086/CDS/hypothetical                 | 53.5  | 17.0 | 10.407 | NA | NA | hypothetical protein |
| TS28Clo09194/CDS/CDS                     | 44.0  | 14.0 | 10.393 | NA | NA | hypothetical protein |
| TS28Ali0894/CDS/CDS                      | 22.0  | 7.0  | 10.393 | NA | NA | hypothetical protein |
| BVU2608/CDS/myo-inositol-1-phosphate     | 15.7  | 5.0  | 10.362 | NA | NA | hypothetical protein |
| BVU1163/CDS/putative                     | 23.5  | 7.5  | 10.362 | NA | NA | hypothetical protein |
| TS29Rum08907/CDS/CDS                     | 7.8   | 2.5  | 10.362 | NA | NA | hypothetical protein |
| BVU3880/CDS/aspartate                    | 28.2  | 9.0  | 10.349 | NA | NA | hypothetical protein |
| BVU1767/CDS/glycoside                    | 4.2   | 1.3  | 10.334 | NA | NA | hypothetical protein |
| TS28Rum12603/CDS/CDS                     | 25.0  | 8.0  | 10.334 | NA | NA | hypothetical protein |
| TS28Par1118/CDS/CDS                      | 12.5  | 4.0  | 10.334 | NA | NA | hypothetical protein |
| TS29Bac09496/CDS/CDS                     | 10.9  | 3.5  | 10.330 | NA | NA | hypothetical protein |
| TS28Met0874/CDS/CDS                      | 40.5  | 13.0 | 10.302 | NA | NA | hypothetical protein |
| BVU0384/CDS/l3-oxoacyl-facyl-carrier     | 18.7  | 6.0  | 10.288 | NA | NA | hypothetical protein |



|                                       |      |       |        |    |    |                      |
|---------------------------------------|------|-------|--------|----|----|----------------------|
| Bdor0470/CDS/CDS                      | 14.0 | 4.5   | 10.288 | NA | NA | hypothetical protein |
| TS28Ali0428/CDS/CDS                   | 90.0 | 29.0  | 10.263 | NA | NA | hypothetical protein |
| FpraM2120623/CDS/CDS                  | 28.9 | 9.3   | 10.246 | NA | NA | hypothetical protein |
| Msm0313/CDS/[NiFe]-hydrogenase-3-type | 5.0  | 1.6   | 10.228 | NA | NA | hypothetical protein |
| BVU4084/CDS/hypothetical              | 37.0 | 12.0  | 10.196 | NA | NA | hypothetical protein |
| TS28Clo00072/CDS/CDS                  | 40.0 | 13.0  | 10.175 | NA | NA | hypothetical protein |
| BVU2313/CDS/2-ketoisovalerate         | 44.5 | 14.5  | 10.149 | NA | NA | hypothetical protein |
| BVU3634/CDS/S0S                       | 27.5 | 9.0   | 10.105 | NA | NA | hypothetical protein |
| TS29Fae08595/CDS/CDS                  | 36.5 | 12.0  | 10.059 | NA | NA | hypothetical protein |
| BVU1319/CDS/phosphate                 | 13.7 | 4.5   | 10.043 | NA | NA | hypothetical protein |
| TS29Eub2152/CDS/CDS                   | 0.5  | 16.6  | 0.100  | NA | NA | hypothetical protein |
| Clep1858/CDS/CDS                      | 3.0  | 99.5  | 0.100  | NA | NA | hypothetical protein |
| Bin2023/CDS/CDS                       | 0.3  | 11.1  | 0.099  | NA | NA | hypothetical protein |
| TS28Bac4061/CDS/CDS                   | 3.0  | 100.0 | 0.099  | NA | NA | hypothetical protein |
| EUBREC2012/CDS/hypothetical           | 5.5  | 183.3 | 0.099  | NA | NA | hypothetical protein |
| EUBREC1182/CDS/hypothetical           | 5.5  | 183.3 | 0.099  | NA | NA | hypothetical protein |
| BVU2880/CDS/formate                   | 1.0  | 33.5  | 0.099  | NA | NA | hypothetical protein |
| FpraM2120295/CDS/CDS                  | 2.0  | 67.0  | 0.099  | NA | NA | hypothetical protein |
| BVU0340/CDS/putative                  | 1.0  | 33.5  | 0.099  | NA | NA | hypothetical protein |
| EUBREC3573/CDS/penitidase             | 0.3  | 11.2  | 0.099  | NA | NA | hypothetical protein |
| TS28Eub7929/CDS/CDS                   | 2.5  | 84.0  | 0.098  | NA | NA | hypothetical protein |
| BVU2229/CDS/glycoside                 | 1.0  | 33.7  | 0.098  | NA | NA | hypothetical protein |
| TS28Clo00931/CDS/CDS                  | 3.0  | 101.0 | 0.098  | NA | NA | hypothetical protein |
| EUBREC0465/CDS/sensor                 | 1.5  | 50.5  | 0.098  | NA | NA | hypothetical protein |
| TS28Fae19036/CDS/CDS                  | 1.5  | 50.5  | 0.098  | NA | NA | hypothetical protein |
| EUBREC2543/CDS/glutamine              | 2.0  | 67.5  | 0.098  | NA | NA | hypothetical protein |
| Robe2661/CDS/CDS                      | 1.0  | 33.8  | 0.098  | NA | NA | hypothetical protein |
| BL1707/CDS/hypothetical               | 0.3  | 8.5   | 0.097  | NA | NA | hypothetical protein |
| TS28Fae17383/CDS/CDS                  | 0.5  | 17.0  | 0.097  | NA | NA | hypothetical protein |
| BVU3044/CDS/hypothetical              | 0.5  | 17.0  | 0.097  | NA | NA | hypothetical protein |
| TS29Rum18921/CDS/CDS                  | 2.0  | 68.0  | 0.097  | NA | NA | hypothetical protein |
| TS29Fae00076/CDS/CDS                  | 1.0  | 34.0  | 0.097  | NA | NA | hypothetical protein |
| TS29Fae03980/CDS/CDS                  | 0.5  | 17.0  | 0.097  | NA | NA | hypothetical protein |
| TS28Bac6304/CDS/CDS                   | 1.0  | 34.0  | 0.097  | NA | NA | hypothetical protein |
| TS28Fae11970/CDS/CDS                  | 0.5  | 17.0  | 0.097  | NA | NA | hypothetical protein |
| TS29Fae05304/CDS/CDS                  | 0.5  | 17.0  | 0.097  | NA | NA | hypothetical protein |
| TS29Fae01831/CDS/CDS                  | 0.3  | 8.5   | 0.097  | NA | NA | hypothetical protein |
| EUBREC1965/CDS/YjeF-like              | 1.0  | 34.0  | 0.097  | NA | NA | hypothetical protein |
| TS28Clo01072/CDS/CDS                  | 12.0 | 410.0 | 0.097  | NA | NA | hypothetical protein |
| Bifra31120119/CDS/CDS                 | 0.4  | 13.2  | 0.097  | NA | NA | hypothetical protein |
| PRABACTJOHN1627/CDS/CDS               | 0.4  | 13.2  | 0.097  | NA | NA | hypothetical protein |
| Bste0891/CDS/CDS                      | 0.4  | 13.2  | 0.097  | NA | NA | hypothetical protein |
| Cbo13992/CDS/CDS                      | 0.4  | 13.8  | 0.096  | NA | NA | hypothetical protein |
| TS28Bac0395/CDS/CDS                   | 2.7  | 92.0  | 0.096  | NA | NA | hypothetical protein |
| TS28Eub0880/CDS/CDS                   | 2.0  | 69.0  | 0.096  | NA | NA | hypothetical protein |
| TS28Eub6143/CDS/CDS                   | 2.0  | 69.0  | 0.096  | NA | NA | hypothetical protein |
| TS28Fae17554/CDS/CDS                  | 0.3  | 11.5  | 0.096  | NA | NA | hypothetical protein |
| TS29Bac09962/CDS/CDS                  | 1.2  | 41.5  | 0.096  | NA | NA | hypothetical protein |
| FpraM2122486/CDS/CDS                  | 1.2  | 41.9  | 0.095  | NA | NA | hypothetical protein |
| BVU1274/CDS/laminonpeptidase          | 1.5  | 52.3  | 0.095  | NA | NA | hypothetical protein |
| Ccom1638/CDS/CDS                      | 0.3  | 9.0   | 0.095  | NA | NA | hypothetical protein |
| BFncet3865/CDS/fusion                 | 0.1  | 5.0   | 0.094  | NA | NA | hypothetical protein |
| TS28Clo00741/CDS/CDS                  | 3.0  | 105.0 | 0.094  | NA | NA | hypothetical protein |
| TS29Fae08072/CDS/CDS                  | 0.5  | 17.5  | 0.094  | NA | NA | hypothetical protein |
| TS28Fae14830/CDS/CDS                  | 0.5  | 17.5  | 0.094  | NA | NA | hypothetical protein |
| TS29Rum15490/CDS/CDS                  | 0.5  | 17.5  | 0.094  | NA | NA | hypothetical protein |
| EUBREC3434/CDS/DNA/RNA                | 2.0  | 70.0  | 0.094  | NA | NA | hypothetical protein |
| TS28Rum14592/CDS/CDS                  | 0.5  | 17.5  | 0.094  | NA | NA | hypothetical protein |
| Bste1778/CDS/CDS                      | 0.5  | 17.5  | 0.094  | NA | NA | hypothetical protein |
| TS28Col0454/CDS/CDS                   | 1.0  | 35.0  | 0.094  | NA | NA | hypothetical protein |
| BVU2245/CDS/hypothetical              | 0.5  | 17.5  | 0.094  | NA | NA | hypothetical protein |
| TS29Bac08027/CDS/CDS                  | 0.5  | 17.5  | 0.094  | NA | NA | hypothetical protein |
| TS29Bac08012/CDS/CDS                  | 0.7  | 23.5  | 0.094  | NA | NA | hypothetical protein |
| Bste1789/CDS/CDS                      | 0.7  | 23.5  | 0.094  | NA | NA | hypothetical protein |
| TS28Clo00999/CDS/CDS                  | 4.0  | 141.0 | 0.094  | NA | NA | hypothetical protein |
| TS28Bac5136/CDS/CDS                   | 0.7  | 23.5  | 0.094  | NA | NA | hypothetical protein |
| TS28Eub4255/CDS/CDS                   | 3.0  | 106.0 | 0.094  | NA | NA | hypothetical protein |
| Cnex2281/CDS/CDS                      | 0.3  | 10.1  | 0.093  | NA | NA | hypothetical protein |
| Rbro1727/CDS/CDS                      | 0.3  | 10.1  | 0.093  | NA | NA | hypothetical protein |
| Ceut2207/CDS/CDS                      | 0.3  | 10.1  | 0.093  | NA | NA | hypothetical protein |
| Dfor2026/CDS/CDS                      | 0.3  | 10.1  | 0.093  | NA | NA | hypothetical protein |
| TS29Rum01264/CDS/CDS                  | 0.3  | 10.1  | 0.093  | NA | NA | hypothetical protein |
| TS28Rum13917/CDS/CDS                  | 1.0  | 35.5  | 0.093  | NA | NA | hypothetical protein |
| TS28Eub6745/CDS/CDS                   | 2.0  | 71.0  | 0.093  | NA | NA | hypothetical protein |
| FpraM2121174/CDS/CDS                  | 1.0  | 35.5  | 0.093  | NA | NA | hypothetical protein |
| TS28Bac8472/CDS/CDS                   | 1.0  | 35.5  | 0.093  | NA | NA | hypothetical protein |
| BLD0787/CDS/Cation                    | 0.3  | 8.9   | 0.093  | NA | NA | hypothetical protein |
| TS28Fae21303/CDS/CDS                  | 1.0  | 36.0  | 0.092  | NA | NA | hypothetical protein |
| TS28Clo00992/CDS/CDS                  | 1.0  | 36.0  | 0.092  | NA | NA | hypothetical protein |
| TS28Fae16975/CDS/CDS                  | 1.0  | 36.0  | 0.092  | NA | NA | hypothetical protein |
| TS28Fae12953/CDS/CDS                  | 0.5  | 18.0  | 0.092  | NA | NA | hypothetical protein |
| TS28Ali0960/CDS/CDS                   | 1.0  | 36.0  | 0.092  | NA | NA | hypothetical protein |
| TS28Bac7592/CDS/CDS                   | 0.5  | 18.0  | 0.092  | NA | NA | hypothetical protein |
| BVU2387/CDS/putative                  | 0.5  | 18.0  | 0.092  | NA | NA | hypothetical protein |
| Bdor4008/CDS/CDS                      | 1.5  | 54.0  | 0.092  | NA | NA | hypothetical protein |
| TS28Fae17291/CDS/CDS                  | 0.5  | 18.0  | 0.092  | NA | NA | hypothetical protein |
| FpraM2120961/CDS/CDS                  | 0.5  | 18.0  | 0.092  | NA | NA | hypothetical protein |
| TS28Ali2208/CDS/CDS                   | 1.0  | 36.0  | 0.092  | NA | NA | hypothetical protein |
| TS28Clo01681/CDS/CDS                  | 2.0  | 72.0  | 0.092  | NA | NA | hypothetical protein |
| TS28Bac8335/CDS/CDS                   | 0.3  | 12.0  | 0.092  | NA | NA | hypothetical protein |
| TS28Clo1828/CDS/CDS                   | 0.3  | 12.0  | 0.092  | NA | NA | hypothetical protein |
| FpraM2120898/CDS/CDS                  | 5.0  | 180.5 | 0.092  | NA | NA | hypothetical protein |

|                                      |     |       |       |    |    |                      |
|--------------------------------------|-----|-------|-------|----|----|----------------------|
| TS28Clo01074/CDS/CDS                 | 6.0 | 217.0 | 0.091 | NA | NA | hypothetical protein |
| BVU2574/CDS/svnl-tRNA                | 1.5 | 54.3  | 0.091 | NA | NA | hypothetical protein |
| EUBREC2996/CDS/alginate              | 1.0 | 36.5  | 0.091 | NA | NA | hypothetical protein |
| HflI2137/CDS/CDS                     | 0.2 | 7.3   | 0.090 | NA | NA | hypothetical protein |
| Dlon2156/CDS/CDS                     | 0.7 | 24.7  | 0.089 | NA | NA | hypothetical protein |
| TS28Fae08745/CDS/CDS                 | 1.0 | 37.0  | 0.089 | NA | NA | hypothetical protein |
| TS28Fae22548/CDS/CDS                 | 0.5 | 18.5  | 0.089 | NA | NA | hypothetical protein |
| RintL10789/CDS/CDS                   | 0.5 | 18.5  | 0.089 | NA | NA | hypothetical protein |
| TS28Eub7903/CDS/CDS                  | 1.0 | 37.0  | 0.089 | NA | NA | hypothetical protein |
| BVU1253/CDS/putative                 | 0.5 | 18.5  | 0.089 | NA | NA | hypothetical protein |
| BVU1130/CDS/multiple                 | 1.0 | 37.0  | 0.089 | NA | NA | hypothetical protein |
| TS28Eub6997/CDS/CDS                  | 1.0 | 37.0  | 0.089 | NA | NA | hypothetical protein |
| TS28Clo01578/CDS/CDS                 | 3.0 | 111.0 | 0.089 | NA | NA | hypothetical protein |
| BFvch460108/CDS/hypothetical         | 0.7 | 24.7  | 0.089 | NA | NA | hypothetical protein |
| EUBREC1095/CDS/hypothetical          | 3.5 | 130.0 | 0.089 | NA | NA | hypothetical protein |
| TS29Fae09750/CDS/CDS                 | 2.0 | 74.5  | 0.089 | NA | NA | hypothetical protein |
| TS29Fae07130/CDS/CDS                 | 0.8 | 28.0  | 0.089 | NA | NA | hypothetical protein |
| TS28Fae16906/CDS/CDS                 | 0.7 | 25.0  | 0.088 | NA | NA | hypothetical protein |
| TS28Clo00445/CDS/CDS                 | 1.0 | 37.5  | 0.088 | NA | NA | hypothetical protein |
| Bdor0336/CDS/CDS                     | 0.3 | 12.5  | 0.088 | NA | NA | hypothetical protein |
| BVU3633/CDS/HPPr(Ser)                | 0.3 | 12.5  | 0.088 | NA | NA | hypothetical protein |
| CspSS21812/CDS/CDS                   | 0.9 | 32.0  | 0.088 | NA | NA | hypothetical protein |
| TS28Eub6783/CDS/CDS                  | 1.5 | 56.5  | 0.088 | NA | NA | hypothetical protein |
| TS28Bac7122/CDS/CDS                  | 1.0 | 37.7  | 0.088 | NA | NA | hypothetical protein |
| TS28Fae22192/CDS/CDS                 | 2.0 | 76.0  | 0.087 | NA | NA | hypothetical protein |
| EUBREC1119/CDS/ glycine              | 1.0 | 38.0  | 0.087 | NA | NA | hypothetical protein |
| TS28Rum02391/CDS/CDS                 | 1.0 | 38.0  | 0.087 | NA | NA | hypothetical protein |
| TS28Eub4655/CDS/CDS                  | 1.0 | 38.0  | 0.087 | NA | NA | hypothetical protein |
| EUBREC2391/CDS/hypothetical          | 1.0 | 38.0  | 0.087 | NA | NA | hypothetical protein |
| EUBREC2602/CDS/hypothetical          | 1.0 | 38.0  | 0.087 | NA | NA | hypothetical protein |
| BVU1011/CDS[3-oxoacyl-l-acyl-carrier | 0.5 | 19.0  | 0.087 | NA | NA | hypothetical protein |
| TS28Bac5238/CDS/CDS                  | 0.5 | 19.0  | 0.087 | NA | NA | hypothetical protein |
| BVU1256/CDS/hypothetical             | 0.5 | 19.0  | 0.087 | NA | NA | hypothetical protein |
| TS29Bac06574/CDS/CDS                 | 1.0 | 38.0  | 0.087 | NA | NA | hypothetical protein |
| TS28Clo00878/CDS/CDS                 | 2.0 | 76.0  | 0.087 | NA | NA | hypothetical protein |
| EUBREC3500/CDS/hypothetical          | 1.0 | 38.2  | 0.087 | NA | NA | hypothetical protein |
| TS29Fae09519/CDS/CDS                 | 1.5 | 57.5  | 0.086 | NA | NA | hypothetical protein |
| TS28Eub8336/CDS/CDS                  | 1.5 | 57.5  | 0.086 | NA | NA | hypothetical protein |
| TS28Bac6904/CDS/CDS                  | 1.0 | 38.5  | 0.086 | NA | NA | hypothetical protein |
| FpraM2120591/CDS/CDS                 | 2.0 | 77.0  | 0.086 | NA | NA | hypothetical protein |
| TS28Eub8527/CDS/CDS                  | 1.0 | 38.5  | 0.086 | NA | NA | hypothetical protein |
| TS28Clo01077/CDS/CDS                 | 2.0 | 77.0  | 0.086 | NA | NA | hypothetical protein |
| BVU13651/CDS/tRNA                    | 1.0 | 38.5  | 0.086 | NA | NA | hypothetical protein |
| TS28Fae11127/CDS/CDS                 | 1.3 | 51.5  | 0.086 | NA | NA | hypothetical protein |
| BL0724/CDS/hreonyl-tRNA              | 0.2 | 6.5   | 0.085 | NA | NA | hypothetical protein |
| FpraM2120610/CDS/CDS                 | 0.5 | 19.5  | 0.085 | NA | NA | hypothetical protein |
| TS28AiI2018/CDS/CDS                  | 1.0 | 39.0  | 0.085 | NA | NA | hypothetical protein |
| TS29Fae06141/CDS/CDS                 | 0.5 | 19.5  | 0.085 | NA | NA | hypothetical protein |
| TS28Eub4169/CDS/CDS                  | 0.5 | 19.5  | 0.085 | NA | NA | hypothetical protein |
| BVU2935/CDS/hypothetical             | 1.0 | 39.0  | 0.085 | NA | NA | hypothetical protein |
| TS28Bac6294/CDS/CDS                  | 5.0 | 195.0 | 0.085 | NA | NA | hypothetical protein |
| TS28Fae20102/CDS/CDS                 | 1.0 | 39.0  | 0.085 | NA | NA | hypothetical protein |
| EUBREC0433/CDS/50S                   | 0.5 | 19.5  | 0.085 | NA | NA | hypothetical protein |
| TS28Clo00874/CDS/CDS                 | 2.0 | 78.0  | 0.085 | NA | NA | hypothetical protein |
| TS28Fae10688/CDS/CDS                 | 0.5 | 19.5  | 0.085 | NA | NA | hypothetical protein |
| TS28Bac6511/CDS/CDS                  | 0.3 | 13.0  | 0.085 | NA | NA | hypothetical protein |
| TS28Rum06775/CDS/CDS                 | 0.3 | 13.0  | 0.085 | NA | NA | hypothetical protein |
| TS28Bac5945/CDS/CDS                  | 3.0 | 117.8 | 0.084 | NA | NA | hypothetical protein |
| BVU1757/CDS/NADH                     | 1.0 | 39.3  | 0.084 | NA | NA | hypothetical protein |
| TS28Clo01570/CDS/CDS                 | 3.0 | 118.0 | 0.084 | NA | NA | hypothetical protein |
| TS28Clo01017/CDS/CDS                 | 2.0 | 79.0  | 0.084 | NA | NA | hypothetical protein |
| TS28Clo00902/CDS/CDS                 | 2.0 | 79.0  | 0.084 | NA | NA | hypothetical protein |
| EUBREC0308/CDS/cysteine              | 1.0 | 39.5  | 0.084 | NA | NA | hypothetical protein |
| EUBREC3563/CDS/hypothetical          | 1.0 | 39.9  | 0.083 | NA | NA | hypothetical protein |
| BFnetc1739/CDS/hypothetical          | 0.4 | 14.7  | 0.083 | NA | NA | hypothetical protein |
| TS28Clo00759/CDS/CDS                 | 1.0 | 40.0  | 0.083 | NA | NA | hypothetical protein |
| TS28Eub8893/CDS/CDS                  | 2.0 | 80.0  | 0.083 | NA | NA | hypothetical protein |
| TS29Fae10148/CDS/CDS                 | 2.0 | 80.0  | 0.083 | NA | NA | hypothetical protein |
| TS28Clo01047/CDS/CDS                 | 2.0 | 80.0  | 0.083 | NA | NA | hypothetical protein |
| TS28Rum02014/CDS/CDS                 | 0.5 | 20.0  | 0.083 | NA | NA | hypothetical protein |
| TS28Eub6732/CDS/CDS                  | 1.0 | 40.0  | 0.083 | NA | NA | hypothetical protein |
| TS28Met1423/CDS/CDS                  | 0.5 | 20.0  | 0.083 | NA | NA | hypothetical protein |
| TS28Clo01136/CDS/CDS                 | 1.0 | 40.0  | 0.083 | NA | NA | hypothetical protein |
| TS28Eub4043/CDS/CDS                  | 1.0 | 40.0  | 0.083 | NA | NA | hypothetical protein |
| TS28Clo00460/CDS/CDS                 | 1.0 | 40.0  | 0.083 | NA | NA | hypothetical protein |
| TS28Clo02444/CDS/CDS                 | 0.5 | 20.0  | 0.083 | NA | NA | hypothetical protein |
| TS28Rum12055/CDS/CDS                 | 0.5 | 20.0  | 0.083 | NA | NA | hypothetical protein |
| BWH22235/CDS/CDS                     | 0.4 | 14.8  | 0.082 | NA | NA | hypothetical protein |
| EUBREC0002/CDS/DNA                   | 1.0 | 40.5  | 0.082 | NA | NA | hypothetical protein |
| TS28Eub8902/CDS/CDS                  | 1.0 | 40.5  | 0.082 | NA | NA | hypothetical protein |
| FpraM2120220/CDS/CDS                 | 1.0 | 40.5  | 0.082 | NA | NA | hypothetical protein |
| BVU0082/CDS/putative                 | 1.0 | 40.5  | 0.082 | NA | NA | hypothetical protein |
| TS28Clo01070/CDS/CDS                 | 3.0 | 122.0 | 0.081 | NA | NA | hypothetical protein |
| BVU2881/CDS/hypothetical             | 0.7 | 29.1  | 0.081 | NA | NA | hypothetical protein |
| BVU1691/CDS/hypothetical             | 0.7 | 29.1  | 0.081 | NA | NA | hypothetical protein |
| BL1757/CDS/hypothetical              | 1.0 | 40.8  | 0.081 | NA | NA | hypothetical protein |
| TS28Clo01082/CDS/CDS                 | 1.0 | 41.0  | 0.081 | NA | NA | hypothetical protein |
| BVU2796/CDS/ glucose-6-phosphate     | 1.0 | 41.0  | 0.081 | NA | NA | hypothetical protein |
| BVU2556/CDS/acetohydroxyacid         | 0.5 | 20.5  | 0.081 | NA | NA | hypothetical protein |
| EUBREC1453/CDS/putative              | 2.0 | 82.0  | 0.081 | NA | NA | hypothetical protein |
| TS28AiI1207/CDS/CDS                  | 1.0 | 41.0  | 0.081 | NA | NA | hypothetical protein |
| TS29Fae08113/CDS/CDS                 | 1.0 | 41.3  | 0.080 | NA | NA | hypothetical protein |

|                                    |      |       |       |    |    |                      |
|------------------------------------|------|-------|-------|----|----|----------------------|
| TS28Clo00764 CDS CDS               | 3.0  | 124.0 | 0.080 | NA | NA | hypothetical protein |
| BVL1565 CDS conserved              | 0.3  | 10.3  | 0.080 | NA | NA | hypothetical protein |
| TS28Bac7839 CDS CDS                | 2.3  | 96.5  | 0.080 | NA | NA | hypothetical protein |
| TS28Eub7436 CDS CDS                | 1.0  | 41.5  | 0.080 | NA | NA | hypothetical protein |
| TS28Bac1117 CDS CDS                | 1.0  | 41.5  | 0.080 | NA | NA | hypothetical protein |
| TS28Bac6293 CDS CDS                | 4.0  | 166.0 | 0.080 | NA | NA | hypothetical protein |
| TS28Clo00697 CDS CDS               | 10.0 | 416.0 | 0.079 | NA | NA | hypothetical protein |
| Rgna2288 CDS CDS                   | 2.2  | 91.7  | 0.079 | NA | NA | hypothetical protein |
| Dfor0547 CDS CDS                   | 0.2  | 7.0   | 0.079 | NA | NA | hypothetical protein |
| EUBREC0552 CDS NLP/P60             | 0.5  | 21.0  | 0.079 | NA | NA | hypothetical protein |
| EUBREC1838 CDS metal               | 1.0  | 42.0  | 0.079 | NA | NA | hypothetical protein |
| EUBREC3645 CDS hypothetical        | 1.0  | 42.0  | 0.079 | NA | NA | hypothetical protein |
| TS29Fae02179 CDS CDS               | 0.5  | 21.0  | 0.079 | NA | NA | hypothetical protein |
| TS28Fae16966 CDS CDS               | 1.0  | 42.0  | 0.079 | NA | NA | hypothetical protein |
| EUBREC0251 CDS hypothetical        | 0.5  | 21.0  | 0.079 | NA | NA | hypothetical protein |
| TS28Fae17816 CDS CDS               | 0.5  | 21.0  | 0.079 | NA | NA | hypothetical protein |
| TS28Clo00700 CDS CDS               | 1.0  | 42.0  | 0.079 | NA | NA | hypothetical protein |
| EUBREC3644 CDS hypothetical        | 1.0  | 42.0  | 0.079 | NA | NA | hypothetical protein |
| TS29Fae00811 CDS CDS               | 0.5  | 21.0  | 0.079 | NA | NA | hypothetical protein |
| Robe2900 CDS CDS                   | 0.5  | 21.0  | 0.079 | NA | NA | hypothetical protein |
| BWH22245 CDS CDS                   | 0.3  | 10.5  | 0.079 | NA | NA | hypothetical protein |
| EUBREC1766 CDS putative            | 1.0  | 42.0  | 0.079 | NA | NA | hypothetical protein |
| TS28Fae18334 CDS CDS               | 0.3  | 14.0  | 0.079 | NA | NA | hypothetical protein |
| Bege3361 CDS CDS                   | 0.1  | 2.1   | 0.079 | NA | NA | hypothetical protein |
| TS28Eub3950 CDS CDS                | 1.7  | 70.1  | 0.079 | NA | NA | hypothetical protein |
| TS29Rum18282 CDS CDS               | 0.9  | 36.0  | 0.078 | NA | NA | hypothetical protein |
| RinL10352 CDS CDS                  | 1.8  | 74.0  | 0.078 | NA | NA | hypothetical protein |
| Rbro0048 CDS CDS                   | 1.8  | 74.0  | 0.078 | NA | NA | hypothetical protein |
| BWH22270 CDS CDS                   | 0.4  | 15.6  | 0.078 | NA | NA | hypothetical protein |
| BVU3095 CDS TonB-dependent         | 1.0  | 42.5  | 0.078 | NA | NA | hypothetical protein |
| TS28Dor3147 CDS CDS                | 1.0  | 42.5  | 0.078 | NA | NA | hypothetical protein |
| Rbro0066 CDS CDS                   | 1.0  | 42.7  | 0.078 | NA | NA | hypothetical protein |
| TS28Clo10465 CDS CDS               | 1.0  | 42.7  | 0.078 | NA | NA | hypothetical protein |
| TS28Eub5978 CDS CDS                | 1.5  | 64.0  | 0.078 | NA | NA | hypothetical protein |
| TS28Clo1592 CDS CDS                | 1.0  | 43.0  | 0.077 | NA | NA | hypothetical protein |
| TS28Eub7583 CDS CDS                | 1.0  | 43.0  | 0.077 | NA | NA | hypothetical protein |
| TS29Rum18619 CDS CDS               | 0.5  | 21.5  | 0.077 | NA | NA | hypothetical protein |
| TS28Eub8337 CDS CDS                | 0.5  | 21.5  | 0.077 | NA | NA | hypothetical protein |
| TS29Bac02045 CDS CDS               | 0.5  | 21.5  | 0.077 | NA | NA | hypothetical protein |
| TS28Clo01463 CDS CDS               | 1.0  | 43.0  | 0.077 | NA | NA | hypothetical protein |
| TS29Fae09566 CDS CDS               | 0.5  | 21.5  | 0.077 | NA | NA | hypothetical protein |
| Dfor2615 CDS CDS                   | 0.6  | 25.8  | 0.077 | NA | NA | hypothetical protein |
| EUBREC0814 CDS hypothetical        | 1.0  | 43.2  | 0.077 | NA | NA | hypothetical protein |
| EUBREC2680 CDS hypothetical        | 1.0  | 43.2  | 0.077 | NA | NA | hypothetical protein |
| TS28Clo02095 CDS CDS               | 1.0  | 43.5  | 0.076 | NA | NA | hypothetical protein |
| TS28Met0193 CDS CDS                | 0.3  | 14.6  | 0.076 | NA | NA | hypothetical protein |
| EUBREC1221 CDS NADH                | 2.0  | 89.0  | 0.076 | NA | NA | hypothetical protein |
| TS28Fae21214 CDS CDS               | 3.0  | 131.5 | 0.075 | NA | NA | hypothetical protein |
| Bcro1276 CDS CDS                   | 2.0  | 88.0  | 0.075 | NA | NA | hypothetical protein |
| BVU2928 CDS hypothetical           | 0.5  | 22.0  | 0.075 | NA | NA | hypothetical protein |
| TS28Fae16382 CDS CDS               | 0.5  | 22.0  | 0.075 | NA | NA | hypothetical protein |
| TS28Clo00824 CDS CDS               | 3.0  | 132.0 | 0.075 | NA | NA | hypothetical protein |
| TS28Fae14948 CDS CDS               | 0.5  | 22.0  | 0.075 | NA | NA | hypothetical protein |
| TS29Rum18587 CDS CDS               | 0.5  | 22.0  | 0.075 | NA | NA | hypothetical protein |
| TS28Fae21581 CDS CDS               | 1.0  | 44.0  | 0.075 | NA | NA | hypothetical protein |
| TS28Ali1393 CDS CDS                | 1.0  | 44.0  | 0.075 | NA | NA | hypothetical protein |
| TS28Clo01525 CDS CDS               | 1.0  | 44.0  | 0.075 | NA | NA | hypothetical protein |
| TS28Fae22354 CDS CDS               | 0.5  | 22.0  | 0.075 | NA | NA | hypothetical protein |
| TS29Fae06611 CDS CDS               | 1.0  | 44.0  | 0.075 | NA | NA | hypothetical protein |
| TS28Clo01622 CDS CDS               | 2.0  | 88.5  | 0.075 | NA | NA | hypothetical protein |
| TS28Clo00762 CDS CDS               | 2.0  | 88.5  | 0.075 | NA | NA | hypothetical protein |
| Buni1905 CDS CDS                   | 0.5  | 22.2  | 0.075 | NA | NA | hypothetical protein |
| Even0433 CDS CDS                   | 1.0  | 44.5  | 0.074 | NA | NA | hypothetical protein |
| TS28Eub4351 CDS CDS                | 4.0  | 178.0 | 0.074 | NA | NA | hypothetical protein |
| FpraM2121613 CDS CDS               | 1.3  | 55.8  | 0.074 | NA | NA | hypothetical protein |
| EUBREC0331 CDS transketolase       | 0.8  | 33.5  | 0.074 | NA | NA | hypothetical protein |
| BL0529 CDS alpha-1,4-glucosidase   | 0.3  | 11.2  | 0.074 | NA | NA | hypothetical protein |
| BVU2644 CDS hypothetical           | 1.0  | 45.0  | 0.073 | NA | NA | hypothetical protein |
| EUBREC1887 CDS two-component       | 0.5  | 22.5  | 0.073 | NA | NA | hypothetical protein |
| TS28Eub5932 CDS CDS                | 1.0  | 45.0  | 0.073 | NA | NA | hypothetical protein |
| TS28Fae05485 CDS CDS               | 1.0  | 45.0  | 0.073 | NA | NA | hypothetical protein |
| TS28Eub4271 CDS CDS                | 1.0  | 45.0  | 0.073 | NA | NA | hypothetical protein |
| EUBREC2325 CDS ABC                 | 2.0  | 90.0  | 0.073 | NA | NA | hypothetical protein |
| TS28Fae11740 CDS CDS               | 1.0  | 45.0  | 0.073 | NA | NA | hypothetical protein |
| BVU0144 CDS aspartate              | 0.3  | 15.0  | 0.073 | NA | NA | hypothetical protein |
| EUBREC2968 CDS cation-transporting | 1.5  | 68.0  | 0.073 | NA | NA | hypothetical protein |
| EUBREC1410 CDS hypothetical        | 0.5  | 22.7  | 0.073 | NA | NA | hypothetical protein |
| Buni1620 CDS CDS                   | 0.5  | 23.0  | 0.072 | NA | NA | hypothetical protein |
| TS29Fae02488 CDS CDS               | 0.5  | 23.0  | 0.072 | NA | NA | hypothetical protein |
| BVU1672 CDS transcriptional        | 0.5  | 23.0  | 0.072 | NA | NA | hypothetical protein |
| TS28Clo01534 CDS CDS               | 2.0  | 92.0  | 0.072 | NA | NA | hypothetical protein |
| TS28Rum14107 CDS CDS               | 1.0  | 46.0  | 0.072 | NA | NA | hypothetical protein |
| TS28Clo00591 CDS CDS               | 2.0  | 92.0  | 0.072 | NA | NA | hypothetical protein |
| TS28Met1710 CDS CDS                | 0.5  | 23.0  | 0.072 | NA | NA | hypothetical protein |
| TS28Clo00664 CDS CDS               | 0.5  | 23.0  | 0.072 | NA | NA | hypothetical protein |
| TS28Eub0817 CDS CDS                | 0.5  | 23.0  | 0.072 | NA | NA | hypothetical protein |
| FpraM2120797 CDS CDS               | 1.0  | 46.0  | 0.072 | NA | NA | hypothetical protein |
| TS28Clo01865 CDS CDS               | 0.5  | 23.0  | 0.072 | NA | NA | hypothetical protein |
| FpraM2120067 CDS CDS               | 1.0  | 46.0  | 0.072 | NA | NA | hypothetical protein |
| EUBREC0430 CDS 50S                 | 0.5  | 23.0  | 0.072 | NA | NA | hypothetical protein |
| TS28Eub0391 CDS CDS                | 2.0  | 92.0  | 0.072 | NA | NA | hypothetical protein |
| BL1637 CDS hypothetical            | 0.3  | 15.3  | 0.072 | NA | NA | hypothetical protein |

|                                                         |     |       |       |    |    |                      |
|---------------------------------------------------------|-----|-------|-------|----|----|----------------------|
| TS29Clo4938/CDS/CDS                                     | 7.0 | 325.5 | 0.071 | NA | NA | hypothetical protein |
| TS28Rum02094/CDS/CDS                                    | 2.0 | 93.0  | 0.071 | NA | NA | hypothetical protein |
| BVU1098/CDS/hypothetical                                | 0.5 | 23.5  | 0.070 | NA | NA | hypothetical protein |
| Bdor4009/CDS/CDS                                        | 1.0 | 47.0  | 0.070 | NA | NA | hypothetical protein |
| FpraM2121408/CDS/CDS                                    | 0.5 | 23.5  | 0.070 | NA | NA | hypothetical protein |
| TS28Fae18390/CDS/CDS                                    | 1.0 | 47.0  | 0.070 | NA | NA | hypothetical protein |
| Bint1992/CDS/CDS                                        | 1.0 | 47.0  | 0.070 | NA | NA | hypothetical protein |
| TS28Fae16526/CDS/CDS                                    | 1.0 | 47.0  | 0.070 | NA | NA | hypothetical protein |
| PRABACTJOHN1626/CDS/CDS                                 | 0.1 | 3.6   | 0.070 | NA | NA | hypothetical protein |
| TS28Eub6361/CDS/CDS                                     | 1.0 | 47.4  | 0.070 | NA | NA | hypothetical protein |
| TS29Rum21229/CDS/CDS                                    | 1.0 | 47.4  | 0.070 | NA | NA | hypothetical protein |
| Robe0210/CDS/CDS                                        | 1.2 | 55.5  | 0.070 | NA | NA | hypothetical protein |
| Dfor2556/CDS/CDS                                        | 0.2 | 11.0  | 0.069 | NA | NA | hypothetical protein |
| Cbar1013/CDS/CDS                                        | 0.3 | 13.7  | 0.069 | NA | NA | hypothetical protein |
| TS28Bif4317/CDS/CDS                                     | 1.0 | 47.8  | 0.069 | NA | NA | hypothetical protein |
| TS29Fae05832/CDS/CDS                                    | 0.7 | 32.0  | 0.069 | NA | NA | hypothetical protein |
| BWH22260/CDS/CDS                                        | 0.3 | 12.0  | 0.069 | NA | NA | hypothetical protein |
| EUBREC1172/CDS/DNA                                      | 1.0 | 48.0  | 0.069 | NA | NA | hypothetical protein |
| EUBREC1949/CDS/UDP-glucose                              | 0.5 | 24.0  | 0.069 | NA | NA | hypothetical protein |
| BWH25656/CDS/CDS                                        | 0.2 | 9.6   | 0.069 | NA | NA | hypothetical protein |
| Bint0429/CDS/CDS                                        | 0.2 | 9.6   | 0.069 | NA | NA | hypothetical protein |
| TS29Bac08050/CDS/CDS                                    | 1.0 | 48.0  | 0.069 | NA | NA | hypothetical protein |
| BactD10023/CDS/CDS                                      | 0.2 | 9.6   | 0.069 | NA | NA | hypothetical protein |
| TS29Bac08025/CDS/CDS                                    | 1.0 | 48.0  | 0.069 | NA | NA | hypothetical protein |
| Bthe3735758/CDS/CDS                                     | 0.2 | 9.6   | 0.069 | NA | NA | hypothetical protein |
| TS29Bac07259/CDS/CDS                                    | 0.2 | 9.6   | 0.069 | NA | NA | hypothetical protein |
| BVU2011/CDS/hypothetical                                | 0.5 | 24.0  | 0.069 | NA | NA | hypothetical protein |
| TS29Fae00028/CDS/CDS                                    | 1.0 | 48.0  | 0.069 | NA | NA | hypothetical protein |
| TS28Rum10925/CDS/CDS                                    | 1.0 | 48.0  | 0.069 | NA | NA | hypothetical protein |
| BVU0159/CDS/hypothetical                                | 1.7 | 80.5  | 0.068 | NA | NA | hypothetical protein |
| TS29Fae06508/CDS/CDS                                    | 1.0 | 48.5  | 0.068 | NA | NA | hypothetical protein |
| TS28Clo00949/CDS/CDS                                    | 2.0 | 97.0  | 0.068 | NA | NA | hypothetical protein |
| EUBREC3341/CDS/hypothetical                             | 1.0 | 48.5  | 0.068 | NA | NA | hypothetical protein |
| TS29Rum17917/CDS/CDS                                    | 0.4 | 19.5  | 0.068 | NA | NA | hypothetical protein |
| TS28Bac7169/CDS/CDS                                     | 0.7 | 32.5  | 0.068 | NA | NA | hypothetical protein |
| TS29Eub0209/CDS/CDS                                     | 0.5 | 24.5  | 0.067 | NA | NA | hypothetical protein |
| TS28Bac0071/CDS/CDS                                     | 1.0 | 49.0  | 0.067 | NA | NA | hypothetical protein |
| TS28Fae07407/CDS/CDS                                    | 0.5 | 24.5  | 0.067 | NA | NA | hypothetical protein |
| TS28Eub6443/CDS/CDS                                     | 1.0 | 49.0  | 0.067 | NA | NA | hypothetical protein |
| TS28Fae12527/CDS/CDS                                    | 1.0 | 49.0  | 0.067 | NA | NA | hypothetical protein |
| BLD1516/CDS/SalY-type                                   | 0.3 | 16.4  | 0.067 | NA | NA | hypothetical protein |
| TS28Bac6946/CDS/CDS                                     | 2.0 | 99.0  | 0.067 | NA | NA | hypothetical protein |
| TS28Clo00683/CDS/CDS                                    | 2.0 | 99.0  | 0.067 | NA | NA | hypothetical protein |
| EUBREC0214/CDS/hypothetical                             | 1.3 | 66.0  | 0.067 | NA | NA | hypothetical protein |
| BVU12051/CDS/cofactor-independent                       | 0.3 | 16.5  | 0.067 | NA | NA | hypothetical protein |
| TS28Fae22430/CDS/CDS                                    | 0.7 | 33.3  | 0.066 | NA | NA | hypothetical protein |
| TS28Fae00197/CDS/CDS                                    | 0.5 | 25.0  | 0.066 | NA | NA | hypothetical protein |
| TS28Rum16284/CDS/CDS                                    | 1.0 | 50.0  | 0.066 | NA | NA | hypothetical protein |
| TS28Eub5044/CDS/CDS                                     | 1.0 | 50.0  | 0.066 | NA | NA | hypothetical protein |
| EUBREC2884/CDS/sugar                                    | 2.0 | 100.5 | 0.066 | NA | NA | hypothetical protein |
| TS28Eub6500/CDS/CDS                                     | 1.0 | 50.5  | 0.065 | NA | NA | hypothetical protein |
| EUBREC1412/CDS/glucuronide                              | 1.0 | 50.8  | 0.065 | NA | NA | hypothetical protein |
| Cmet1600/CDS/CDS                                        | 0.2 | 8.5   | 0.065 | NA | NA | hypothetical protein |
| TS28Clo1010/CDS/CDS                                     | 1.0 | 51.0  | 0.065 | NA | NA | hypothetical protein |
| TS28Eub7284/CDS/CDS                                     | 1.0 | 51.0  | 0.065 | NA | NA | hypothetical protein |
| TS29Rum11749/CDS/CDS                                    | 0.3 | 17.0  | 0.065 | NA | NA | hypothetical protein |
| TS28Rum11489/CDS/CDS                                    | 0.3 | 17.0  | 0.065 | NA | NA | hypothetical protein |
| Bdor1706/CDS/CDS                                        | 1.0 | 51.2  | 0.065 | NA | NA | hypothetical protein |
| Bste0823/CDS/CDS                                        | 0.2 | 11.1  | 0.065 | NA | NA | hypothetical protein |
| Bste0014/CDS/CDS                                        | 0.2 | 11.1  | 0.065 | NA | NA | hypothetical protein |
| TS28Clo01765/CDS/CDS                                    | 4.0 | 205.5 | 0.064 | NA | NA | hypothetical protein |
| TS28Rum13599/CDS/CDS                                    | 1.0 | 51.5  | 0.064 | NA | NA | hypothetical protein |
| BVU2193/CDS/TonB-dependent                              | 1.0 | 51.5  | 0.064 | NA | NA | hypothetical protein |
| TS28Rum14265/CDS/CDS                                    | 2.0 | 103.0 | 0.064 | NA | NA | hypothetical protein |
| TS29Fae06530/CDS/CDS                                    | 0.5 | 25.8  | 0.064 | NA | NA | hypothetical protein |
| BLD1743/CDS/Translation                                 | 0.5 | 26.0  | 0.064 | NA | NA | hypothetical protein |
| TS28Eub5549/CDS/CDS                                     | 0.5 | 26.0  | 0.064 | NA | NA | hypothetical protein |
| TS28Eub8390/CDS/CDS                                     | 4.0 | 208.5 | 0.063 | NA | NA | hypothetical protein |
| TS28Eub8473/CDS/CDS                                     | 0.7 | 35.0  | 0.063 | NA | NA | hypothetical protein |
| Ceum0015/CDS/CDS                                        | 0.4 | 21.0  | 0.063 | NA | NA | hypothetical protein |
| TS28Fae18989/CDS/CDS                                    | 0.3 | 17.5  | 0.063 | NA | NA | hypothetical protein |
| Dfor3094/CDS/CDS                                        | 0.7 | 36.6  | 0.063 | NA | NA | hypothetical protein |
| Ccom2068/CDS/CDS                                        | 0.7 | 36.6  | 0.063 | NA | NA | hypothetical protein |
| TS28Bif3723/CDS/CDS                                     | 1.3 | 70.2  | 0.063 | NA | NA | hypothetical protein |
| EUBREC2580/CDS/valyl-tRNA                               | 3.0 | 158.0 | 0.063 | NA | NA | hypothetical protein |
| TS28Ali1768/CDS/CDS                                     | 0.5 | 26.5  | 0.062 | NA | NA | hypothetical protein |
| EUBREC2250/CDS/UDP-N-acetyl-muramoylalanine-D-glutamate | 0.5 | 26.5  | 0.062 | NA | NA | hypothetical protein |
| TS29Fae06618/CDS/CDS                                    | 0.5 | 26.5  | 0.062 | NA | NA | hypothetical protein |
| TS28Bac0075/CDS/CDS                                     | 1.0 | 53.0  | 0.062 | NA | NA | hypothetical protein |
| TS28Met0525/CDS/CDS                                     | 0.3 | 17.8  | 0.062 | NA | NA | hypothetical protein |
| TS28Clo01654/CDS/CDS                                    | 3.0 | 160.0 | 0.062 | NA | NA | hypothetical protein |
| TS28Fae12737/CDS/CDS                                    | 2.0 | 107.0 | 0.062 | NA | NA | hypothetical protein |
| TS28Clo00447/CDS/CDS                                    | 3.0 | 161.0 | 0.062 | NA | NA | hypothetical protein |
| TS28Met1428/CDS/CDS                                     | 0.8 | 40.3  | 0.061 | NA | NA | hypothetical protein |
| RintL10087/CDS/CDS                                      | 0.3 | 15.4  | 0.061 | NA | NA | hypothetical protein |
| Csci3164/CDS/CDS                                        | 0.3 | 15.4  | 0.061 | NA | NA | hypothetical protein |
| TS29Fae07277/CDS/CDS                                    | 0.5 | 27.0  | 0.061 | NA | NA | hypothetical protein |
| BVU4189/CDS/TonB-dependent                              | 0.5 | 27.0  | 0.061 | NA | NA | hypothetical protein |
| BVU2307/CDS/putative                                    | 0.5 | 27.0  | 0.061 | NA | NA | hypothetical protein |
| TS28Rum13641/CDS/CDS                                    | 0.5 | 27.0  | 0.061 | NA | NA | hypothetical protein |
| EUBREC1878/CDS/3-isopropylmalate                        | 0.5 | 27.0  | 0.061 | NA | NA | hypothetical protein |

|                                               |     |       |       |    |    |                      |
|-----------------------------------------------|-----|-------|-------|----|----|----------------------|
| FpraM2120773/CDS/CDS                          | 0.3 | 18.0  | 0.061 | NA | NA | hypothetical protein |
| BVL0548/CDS/hypothetical                      | 0.3 | 18.0  | 0.061 | NA | NA | hypothetical protein |
| TS29Rum19624/CDS/CDS                          | 1.0 | 54.3  | 0.061 | NA | NA | hypothetical protein |
| TS28Clo00448/CDS/CDS                          | 2.0 | 109.0 | 0.061 | NA | NA | hypothetical protein |
| TS29Rum00383/CDS/CDS                          | 2.5 | 136.5 | 0.061 | NA | NA | hypothetical protein |
| TS28Eub4277/CDS/CDS                           | 1.0 | 55.0  | 0.060 | NA | NA | hypothetical protein |
| TS28Ali0566/CDS/CDS                           | 1.0 | 55.0  | 0.060 | NA | NA | hypothetical protein |
| BVL02915/CDS/polysaccharide                   | 1.0 | 55.0  | 0.060 | NA | NA | hypothetical protein |
| BVL0892/CDS/glycosyltransferase               | 0.5 | 27.5  | 0.060 | NA | NA | hypothetical protein |
| Robe2898/CDS/CDS                              | 1.0 | 55.0  | 0.060 | NA | NA | hypothetical protein |
| BLD0861/CDS/Phosphoribosylformylglycinamidine | 0.3 | 18.4  | 0.060 | NA | NA | hypothetical protein |
| EUBREC0046/CDS/hypothetical                   | 2.0 | 111.0 | 0.060 | NA | NA | hypothetical protein |
| TS28Clo0667/CDS/CDS                           | 2.0 | 111.0 | 0.060 | NA | NA | hypothetical protein |
| TS29Fae06763/CDS/CDS                          | 0.3 | 14.0  | 0.059 | NA | NA | hypothetical protein |
| Robe3851/CDS/CDS                              | 0.5 | 28.0  | 0.059 | NA | NA | hypothetical protein |
| TS28Eub7859/CDS/CDS                           | 0.5 | 28.0  | 0.059 | NA | NA | hypothetical protein |
| TS28Clo00941/CDS/CDS                          | 1.0 | 56.0  | 0.059 | NA | NA | hypothetical protein |
| TS28Fae18280/CDS/CDS                          | 0.5 | 28.0  | 0.059 | NA | NA | hypothetical protein |
| TS28Clo00896/CDS/CDS                          | 2.0 | 112.0 | 0.059 | NA | NA | hypothetical protein |
| TS28Fae16649/CDS/CDS                          | 0.5 | 28.0  | 0.059 | NA | NA | hypothetical protein |
| TS29Rum16988/CDS/CDS                          | 1.0 | 56.0  | 0.059 | NA | NA | hypothetical protein |
| TS28Bac6295/CDS/CDS                           | 3.0 | 169.0 | 0.059 | NA | NA | hypothetical protein |
| Dfor3093/CDS/CDS                              | 2.0 | 113.0 | 0.059 | NA | NA | hypothetical protein |
| Rtor0960/CDS/CDS                              | 0.3 | 17.5  | 0.058 | NA | NA | hypothetical protein |
| Robe0055/CDS/CDS                              | 0.3 | 14.2  | 0.058 | NA | NA | hypothetical protein |
| CspSS21646/CDS/CDS                            | 1.1 | 61.0  | 0.058 | NA | NA | hypothetical protein |
| TS28Clo01056/CDS/CDS                          | 1.0 | 57.0  | 0.058 | NA | NA | hypothetical protein |
| TS29Rum11599/CDS/CDS                          | 1.0 | 57.0  | 0.058 | NA | NA | hypothetical protein |
| BVL1419/CDS/RNA                               | 0.3 | 19.0  | 0.058 | NA | NA | hypothetical protein |
| Msm1534/CDS/adhesin-like                      | 0.7 | 38.3  | 0.058 | NA | NA | hypothetical protein |
| Bdor1741/CDS/CDS                              | 0.3 | 19.2  | 0.058 | NA | NA | hypothetical protein |
| TS29Bac08638/CDS/CDS                          | 0.4 | 21.2  | 0.057 | NA | NA | hypothetical protein |
| EUBREC3385/CDS/hypothetical                   | 2.0 | 115.5 | 0.057 | NA | NA | hypothetical protein |
| EUBREC1492/CDS/3-dehydroquinate               | 1.0 | 58.0  | 0.057 | NA | NA | hypothetical protein |
| TS28Par2472/CDS/CDS                           | 1.0 | 58.0  | 0.057 | NA | NA | hypothetical protein |
| TS28Fae14509/CDS/CDS                          | 1.0 | 58.0  | 0.057 | NA | NA | hypothetical protein |
| TS28Fae05387/CDS/CDS                          | 1.0 | 58.0  | 0.057 | NA | NA | hypothetical protein |
| Ebi0556/CDS/CDS                               | 0.7 | 39.0  | 0.057 | NA | NA | hypothetical protein |
| CspM6211849/CDS/CDS                           | 0.3 | 18.1  | 0.056 | NA | NA | hypothetical protein |
| Rbro1723/CDS/CDS                              | 0.3 | 18.1  | 0.056 | NA | NA | hypothetical protein |
| Acol2781/CDS/CDS                              | 0.3 | 18.1  | 0.056 | NA | NA | hypothetical protein |
| Dfor2033/CDS/CDS                              | 0.3 | 18.1  | 0.056 | NA | NA | hypothetical protein |
| TS28Clo00184/CDS/CDS                          | 0.3 | 18.1  | 0.056 | NA | NA | hypothetical protein |
| Acae2252/CDS/CDS                              | 0.3 | 18.1  | 0.056 | NA | NA | hypothetical protein |
| Cnex2286/CDS/CDS                              | 0.3 | 18.1  | 0.056 | NA | NA | hypothetical protein |
| BLD0034/CDS/truncated                         | 0.8 | 45.9  | 0.056 | NA | NA | hypothetical protein |
| TS28Fae05287/CDS/CDS                          | 0.2 | 9.8   | 0.056 | NA | NA | hypothetical protein |
| TS29Fae09069/CDS/CDS                          | 0.5 | 29.5  | 0.056 | NA | NA | hypothetical protein |
| TS29Fae01773/CDS/CDS                          | 0.5 | 29.5  | 0.056 | NA | NA | hypothetical protein |
| BVL1268/CDS/glycoside                         | 1.0 | 59.0  | 0.056 | NA | NA | hypothetical protein |
| TS28Clo00480/CDS/CDS                          | 3.0 | 178.0 | 0.056 | NA | NA | hypothetical protein |
| EUBREC1173/CDS/hypothetical                   | 2.0 | 119.0 | 0.056 | NA | NA | hypothetical protein |
| TS28Bac1201/CDS/CDS                           | 0.3 | 19.8  | 0.056 | NA | NA | hypothetical protein |
| TS28Clo10837/CDS/CDS                          | 0.7 | 40.0  | 0.055 | NA | NA | hypothetical protein |
| TS29Dor2086/CDS/CDS                           | 1.0 | 60.0  | 0.055 | NA | NA | hypothetical protein |
| TS29Bac07992/CDS/CDS                          | 1.5 | 90.0  | 0.055 | NA | NA | hypothetical protein |
| TS29Fae06583/CDS/CDS                          | 0.5 | 30.0  | 0.055 | NA | NA | hypothetical protein |
| TS29Bac08057/CDS/CDS                          | 3.0 | 181.2 | 0.055 | NA | NA | hypothetical protein |
| Rumhvd1704/CDS/CDS                            | 1.0 | 61.8  | 0.055 | NA | NA | hypothetical protein |
| TS28Dor2258/CDS/CDS                           | 6.0 | 364.0 | 0.055 | NA | NA | hypothetical protein |
| BL1411/CDS/cell                               | 0.3 | 15.3  | 0.054 | NA | NA | hypothetical protein |
| TS28Fae18222/CDS/CDS                          | 1.0 | 61.0  | 0.054 | NA | NA | hypothetical protein |
| EUBREC3685/CDS/hypothetical                   | 2.5 | 152.5 | 0.054 | NA | NA | hypothetical protein |
| TS28Clo01065/CDS/CDS                          | 1.0 | 61.0  | 0.054 | NA | NA | hypothetical protein |
| Dlon2013/CDS/CDS                              | 0.6 | 36.8  | 0.054 | NA | NA | hypothetical protein |
| EUBREC3570/CDS/DNA                            | 1.0 | 58.4  | 0.054 | NA | NA | hypothetical protein |
| Ceut2234/CDS/CDS                              | 0.3 | 20.5  | 0.054 | NA | NA | hypothetical protein |
| TS28Dor0606/CDS/CDS                           | 0.3 | 20.5  | 0.054 | NA | NA | hypothetical protein |
| Bconroc0600/CDS/CDS                           | 0.4 | 22.6  | 0.054 | NA | NA | hypothetical protein |
| Bple1110/CDS/CDS                              | 0.4 | 22.6  | 0.054 | NA | NA | hypothetical protein |
| FpraM2121552/CDS/CDS                          | 0.8 | 51.5  | 0.054 | NA | NA | hypothetical protein |
| TS28Fae21222/CDS/CDS                          | 2.0 | 124.0 | 0.053 | NA | NA | hypothetical protein |
| Rtor0962/CDS/CDS                              | 0.1 | 9.0   | 0.052 | NA | NA | hypothetical protein |
| TS28Clo01372/CDS/CDS                          | 1.0 | 63.0  | 0.052 | NA | NA | hypothetical protein |
| Acol1939/CDS/CDS                              | 0.3 | 21.0  | 0.052 | NA | NA | hypothetical protein |
| Cho14015/CDS/CDS                              | 0.2 | 12.7  | 0.052 | NA | NA | hypothetical protein |
| TS28Bif5373/CDS/CDS                           | 0.3 | 15.8  | 0.052 | NA | NA | hypothetical protein |
| TS28Fae08466/CDS/CDS                          | 1.0 | 64.0  | 0.052 | NA | NA | hypothetical protein |
| TS29Fae03678/CDS/CDS                          | 0.3 | 16.0  | 0.052 | NA | NA | hypothetical protein |
| Bin2007/CDS/CDS                               | 0.3 | 16.0  | 0.052 | NA | NA | hypothetical protein |
| Rtor0322/CDS/CDS                              | 0.3 | 20.0  | 0.051 | NA | NA | hypothetical protein |
| TS29Dor2225/CDS/CDS                           | 0.5 | 32.5  | 0.051 | NA | NA | hypothetical protein |
| TS28Bac8044/CDS/CDS                           | 0.5 | 32.5  | 0.051 | NA | NA | hypothetical protein |
| TS28Dor2627/CDS/CDS                           | 0.5 | 32.5  | 0.051 | NA | NA | hypothetical protein |
| TS29Fae06075/CDS/CDS                          | 0.4 | 26.0  | 0.051 | NA | NA | hypothetical protein |
| TS28Eub1526/CDS/CDS                           | 2.0 | 130.5 | 0.051 | NA | NA | hypothetical protein |
| Rbro0068/CDS/CDS                              | 2.5 | 163.5 | 0.051 | NA | NA | hypothetical protein |
| TS28Fae12986/CDS/CDS                          | 0.5 | 33.0  | 0.050 | NA | NA | hypothetical protein |
| TS29Fae09070/CDS/CDS                          | 1.0 | 66.0  | 0.050 | NA | NA | hypothetical protein |
| TS28Clo1384/CDS/CDS                           | 1.0 | 66.0  | 0.050 | NA | NA | hypothetical protein |
| TS28Eub6436/CDS/CDS                           | 1.5 | 99.5  | 0.050 | NA | NA | hypothetical protein |

|                                             |     |       |       |    |    |                      |
|---------------------------------------------|-----|-------|-------|----|----|----------------------|
| RintL11240/CDS/CDS                          | 0.3 | 20.4  | 0.050 | NA | NA | hypothetical protein |
| EUBREC0458/CDS/transcription-repair         | 1.5 | 100.0 | 0.050 | NA | NA | hypothetical protein |
| TS28Clo01370/CDS/CDS                        | 1.0 | 67.0  | 0.049 | NA | NA | hypothetical protein |
| TS29Fae07181/CDS/CDS                        | 1.0 | 67.0  | 0.049 | NA | NA | hypothetical protein |
| BVU1555/CDS/putative                        | 0.2 | 13.6  | 0.049 | NA | NA | hypothetical protein |
| TS28Fae08953/CDS/CDS                        | 1.0 | 68.0  | 0.049 | NA | NA | hypothetical protein |
| TS28Clo01235/CDS/CDS                        | 1.0 | 68.0  | 0.049 | NA | NA | hypothetical protein |
| EUBREC1977/CDS/hypothetical                 | 1.0 | 68.0  | 0.049 | NA | NA | hypothetical protein |
| BVU0679/CDS/putative                        | 0.2 | 13.6  | 0.049 | NA | NA | hypothetical protein |
| Cbo13997/CDS/CDS                            | 0.3 | 17.0  | 0.049 | NA | NA | hypothetical protein |
| Cbar1002/CDS/CDS                            | 1.0 | 68.2  | 0.049 | NA | NA | hypothetical protein |
| TS29RumUnc1290/CDS/CDS                      | 2.5 | 171.0 | 0.048 | NA | NA | hypothetical protein |
| TS28Clo00982/CDS/CDS                        | 1.0 | 68.5  | 0.048 | NA | NA | hypothetical protein |
| BVU12622/CDS/putative                       | 0.1 | 3.4   | 0.048 | NA | NA | hypothetical protein |
| BVU1425/CDS/putative                        | 0.1 | 3.4   | 0.048 | NA | NA | hypothetical protein |
| TS28Clo10832/CDS/CDS                        | 0.5 | 34.5  | 0.048 | NA | NA | hypothetical protein |
| TS28Eub0795/CDS/CDS                         | 0.5 | 34.5  | 0.048 | NA | NA | hypothetical protein |
| TS29Rum13608/CDS/CDS                        | 0.5 | 35.0  | 0.047 | NA | NA | hypothetical protein |
| TS28Clo01058/CDS/CDS                        | 1.0 | 71.0  | 0.047 | NA | NA | hypothetical protein |
| TS28Bac5143/CDS/CDS                         | 1.0 | 71.0  | 0.047 | NA | NA | hypothetical protein |
| EUBREC1053/CDS/isoleucyl-tRNA               | 0.5 | 35.5  | 0.047 | NA | NA | hypothetical protein |
| Rbro0328/CDS/CDS                            | 0.3 | 23.7  | 0.047 | NA | NA | hypothetical protein |
| Bpse0931/CDS/CDS                            | 0.6 | 42.7  | 0.047 | NA | NA | hypothetical protein |
| TS28Clo00918/CDS/CDS                        | 2.0 | 142.5 | 0.046 | NA | NA | hypothetical protein |
| TS28Bac1206/CDS/CDS                         | 0.8 | 53.8  | 0.046 | NA | NA | hypothetical protein |
| TS28Clo01133/CDS/CDS                        | 2.0 | 144.0 | 0.046 | NA | NA | hypothetical protein |
| TS28Rum08536/CDS/CDS                        | 0.3 | 18.0  | 0.046 | NA | NA | hypothetical protein |
| EUBREC2171/CDS/putative                     | 1.0 | 72.0  | 0.046 | NA | NA | hypothetical protein |
| TS28Bac5647/CDS/CDS                         | 0.5 | 36.0  | 0.046 | NA | NA | hypothetical protein |
| TS28Clo01725/CDS/CDS                        | 3.0 | 217.0 | 0.046 | NA | NA | hypothetical protein |
| Ccom1805/CDS/CDS                            | 0.2 | 14.5  | 0.046 | NA | NA | hypothetical protein |
| EUBREC0381/CDS/ribosomal                    | 0.4 | 26.5  | 0.046 | NA | NA | hypothetical protein |
| FpraM2121398/CDS/CDS                        | 1.0 | 73.0  | 0.045 | NA | NA | hypothetical protein |
| TS28Dor1842/CDS/CDS                         | 1.0 | 74.0  | 0.045 | NA | NA | hypothetical protein |
| TS28Bac7301/CDS/CDS                         | 1.0 | 74.0  | 0.045 | NA | NA | hypothetical protein |
| TS28Eub4340/CDS/CDS                         | 1.0 | 74.0  | 0.045 | NA | NA | hypothetical protein |
| TS29Fae08071/CDS/CDS                        | 0.5 | 37.0  | 0.045 | NA | NA | hypothetical protein |
| EUBREC3482/CDS/phosphatidylglycerophosphate | 0.5 | 40.2  | 0.045 | NA | NA | hypothetical protein |
| TS28Bac7857/CDS/CDS                         | 1.0 | 74.2  | 0.045 | NA | NA | hypothetical protein |
| TS28Clo00907/CDS/CDS                        | 2.0 | 149.0 | 0.044 | NA | NA | hypothetical protein |
| TS28Clo00883/CDS/CDS                        | 2.0 | 149.0 | 0.044 | NA | NA | hypothetical protein |
| BVU1198/CDS/hypothetical                    | 0.5 | 37.5  | 0.044 | NA | NA | hypothetical protein |
| TS28Eub4093/CDS/CDS                         | 1.0 | 75.0  | 0.044 | NA | NA | hypothetical protein |
| TS28Clo00488/CDS/CDS                        | 1.0 | 75.0  | 0.044 | NA | NA | hypothetical protein |
| TS28Bif4932/CDS/CDS                         | 0.3 | 19.1  | 0.043 | NA | NA | hypothetical protein |
| TS28Clo01036/CDS/CDS                        | 2.0 | 153.0 | 0.043 | NA | NA | hypothetical protein |
| TS28Bif2996/CDS/CDS                         | 0.6 | 46.7  | 0.043 | NA | NA | hypothetical protein |
| TS28Clo01126/CDS/CDS                        | 1.0 | 78.0  | 0.042 | NA | NA | hypothetical protein |
| TS28Clo01501/CDS/CDS                        | 1.0 | 78.0  | 0.042 | NA | NA | hypothetical protein |
| BVU1141/CDS/hypothetical                    | 0.3 | 26.2  | 0.042 | NA | NA | hypothetical protein |
| EUBREC1134/CDS/putative                     | 1.0 | 79.0  | 0.042 | NA | NA | hypothetical protein |
| TS28Eub3890/CDS/CDS                         | 0.5 | 39.5  | 0.042 | NA | NA | hypothetical protein |
| TS28Eub8377/CDS/CDS                         | 3.5 | 276.5 | 0.042 | NA | NA | hypothetical protein |
| TS28Bif2711/CDS/CDS                         | 2.0 | 158.5 | 0.042 | NA | NA | hypothetical protein |
| EUBREC3564/CDS/possible                     | 2.0 | 158.5 | 0.042 | NA | NA | hypothetical protein |
| TS28Dor2650/CDS/CDS                         | 1.0 | 79.3  | 0.042 | NA | NA | hypothetical protein |
| TS28Clo10371/CDS/CDS                        | 0.3 | 20.1  | 0.041 | NA | NA | hypothetical protein |
| TS28Dor2993/CDS/CDS                         | 1.0 | 80.5  | 0.041 | NA | NA | hypothetical protein |
| TS28Met0493/CDS/CDS                         | 0.3 | 27.0  | 0.041 | NA | NA | hypothetical protein |
| FpraM2122627/CDS/CDS                        | 0.3 | 27.0  | 0.041 | NA | NA | hypothetical protein |
| TS28Clo00497/CDS/CDS                        | 2.0 | 162.5 | 0.041 | NA | NA | hypothetical protein |
| TS29Fae08867/CDS/CDS                        | 1.3 | 101.7 | 0.041 | NA | NA | hypothetical protein |
| TS28Clo00782/CDS/CDS                        | 4.0 | 326.0 | 0.041 | NA | NA | hypothetical protein |
| TS28Eub4083/CDS/CDS                         | 0.5 | 41.0  | 0.040 | NA | NA | hypothetical protein |
| TS28Bif5176/CDS/CDS                         | 0.3 | 20.5  | 0.040 | NA | NA | hypothetical protein |
| TS28Fae21314/CDS/CDS                        | 0.5 | 41.3  | 0.040 | NA | NA | hypothetical protein |
| TS28Clo01767/CDS/CDS                        | 1.0 | 83.0  | 0.040 | NA | NA | hypothetical protein |
| TS28Fae01105/CDS/CDS                        | 1.0 | 83.0  | 0.040 | NA | NA | hypothetical protein |
| TS28Clo00679/CDS/CDS                        | 1.0 | 83.0  | 0.040 | NA | NA | hypothetical protein |
| TS28Clo01038/CDS/CDS                        | 2.0 | 166.0 | 0.040 | NA | NA | hypothetical protein |
| TS28Bac6292/CDS/CDS                         | 2.0 | 166.0 | 0.040 | NA | NA | hypothetical protein |
| TS28Clo01231/CDS/CDS                        | 1.0 | 83.0  | 0.040 | NA | NA | hypothetical protein |
| BL1470/CDS/hypothetical                     | 1.5 | 125.8 | 0.039 | NA | NA | hypothetical protein |
| TS28Fae22189/CDS/CDS                        | 0.5 | 42.0  | 0.039 | NA | NA | hypothetical protein |
| TS29Fae06459/CDS/CDS                        | 0.5 | 42.0  | 0.039 | NA | NA | hypothetical protein |
| BVU13827/CDS/putative                       | 0.3 | 28.0  | 0.039 | NA | NA | hypothetical protein |
| TS29Rum18681/CDS/CDS                        | 0.6 | 50.7  | 0.039 | NA | NA | hypothetical protein |
| EUBREC3015/CDS/hypothetical                 | 1.0 | 84.5  | 0.039 | NA | NA | hypothetical protein |
| TS28Clo00751/CDS/CDS                        | 1.0 | 85.0  | 0.039 | NA | NA | hypothetical protein |
| Csci3153/CDS/CDS                            | 0.3 | 26.3  | 0.039 | NA | NA | hypothetical protein |
| TS28Met1332/CDS/CDS                         | 0.5 | 42.8  | 0.039 | NA | NA | hypothetical protein |
| TS28Clo00922/CDS/CDS                        | 1.0 | 86.0  | 0.038 | NA | NA | hypothetical protein |
| BVU1365/CDS/glycoside                       | 1.0 | 86.0  | 0.038 | NA | NA | hypothetical protein |
| EUBREC1029/CDS/long-chain-fatty-acid        | 1.0 | 86.0  | 0.038 | NA | NA | hypothetical protein |
| BVU3467/CDS/DNA                             | 0.3 | 28.8  | 0.038 | NA | NA | hypothetical protein |
| TS28Rum02259/CDS/CDS                        | 2.0 | 173.5 | 0.038 | NA | NA | hypothetical protein |
| TS28Eub4687/CDS/CDS                         | 0.5 | 43.5  | 0.038 | NA | NA | hypothetical protein |
| TS28Fae22126/CDS/CDS                        | 1.0 | 87.5  | 0.038 | NA | NA | hypothetical protein |
| TS28Bac6333/CDS/CDS                         | 1.0 | 88.0  | 0.038 | NA | NA | hypothetical protein |
| EUBREC0033/CDS/serine/threonine             | 1.0 | 88.5  | 0.037 | NA | NA | hypothetical protein |
| BVU3523/CDS/putative                        | 0.7 | 59.0  | 0.037 | NA | NA | hypothetical protein |
| Cnex1095/CDS/CDS                            | 0.8 | 71.0  | 0.037 | NA | NA | hypothetical protein |

|                              |     |       |       |    |    |                      |
|------------------------------|-----|-------|-------|----|----|----------------------|
| EUBREC2964/CDS glycogen      | 0.5 | 44.5  | 0.037 | NA | NA | hypothetical protein |
| BFncte4052/CDS putative      | 0.3 | 29.7  | 0.037 | NA | NA | hypothetical protein |
| TS28Bac1205/CDS/CDS          | 0.8 | 67.3  | 0.037 | NA | NA | hypothetical protein |
| TS28Fae22125/CDS/CDS         | 0.5 | 45.0  | 0.037 | NA | NA | hypothetical protein |
| EUBREC2203/CDS stage         | 1.0 | 90.0  | 0.037 | NA | NA | hypothetical protein |
| FpraM2121214/CDS/CDS         | 0.3 | 22.5  | 0.037 | NA | NA | hypothetical protein |
| CspM6210574/CDS/CDS          | 0.5 | 49.3  | 0.036 | NA | NA | hypothetical protein |
| TS28Clo00858/CDS/CDS         | 1.0 | 91.0  | 0.036 | NA | NA | hypothetical protein |
| TS28Eub3931/CDS/CDS          | 0.5 | 45.5  | 0.036 | NA | NA | hypothetical protein |
| TS28Fae19000/CDS/CDS         | 0.3 | 23.0  | 0.036 | NA | NA | hypothetical protein |
| TS28Clo01351/CDS/CDS         | 1.0 | 94.0  | 0.035 | NA | NA | hypothetical protein |
| TS28Fae16430/CDS/CDS         | 0.5 | 47.0  | 0.035 | NA | NA | hypothetical protein |
| TS28Fae22693/CDS/CDS         | 1.5 | 141.0 | 0.035 | NA | NA | hypothetical protein |
| TS29Fae03003/CDS/CDS         | 1.0 | 96.0  | 0.034 | NA | NA | hypothetical protein |
| TS29Rum13270/CDS/CDS         | 0.7 | 64.5  | 0.034 | NA | NA | hypothetical protein |
| TS28Clo00787/CDS/CDS         | 1.0 | 97.0  | 0.034 | NA | NA | hypothetical protein |
| TS28Clo00568/CDS/CDS         | 1.0 | 97.0  | 0.034 | NA | NA | hypothetical protein |
| TS28Clo01659/CDS/CDS         | 1.0 | 97.0  | 0.034 | NA | NA | hypothetical protein |
| BVU1858/CDS slutaryl-7-ACA   | 0.3 | 32.5  | 0.034 | NA | NA | hypothetical protein |
| TS28Eub7968/CDS/CDS          | 0.7 | 65.3  | 0.034 | NA | NA | hypothetical protein |
| EUBREC1241/CDS hypothetical  | 1.0 | 99.0  | 0.033 | NA | NA | hypothetical protein |
| Cnex0003/CDS/CDS             | 0.1 | 9.0   | 0.033 | NA | NA | hypothetical protein |
| TS29Eub2196/CDS/CDS          | 0.5 | 49.8  | 0.033 | NA | NA | hypothetical protein |
| TS28Eub8935/CDS/CDS          | 0.5 | 50.0  | 0.033 | NA | NA | hypothetical protein |
| TS29Fae03174/CDS/CDS         | 0.3 | 25.0  | 0.033 | NA | NA | hypothetical protein |
| TS28Fae11974/CDS/CDS         | 1.0 | 100.5 | 0.033 | NA | NA | hypothetical protein |
| TS28Clo00670/CDS/CDS         | 1.0 | 101.0 | 0.033 | NA | NA | hypothetical protein |
| TS28Clo00800/CDS/CDS         | 2.0 | 202.0 | 0.033 | NA | NA | hypothetical protein |
| TS28Clo01557/CDS/CDS         | 2.0 | 204.0 | 0.032 | NA | NA | hypothetical protein |
| TS28Clo01671/CDS/CDS         | 1.0 | 103.0 | 0.032 | NA | NA | hypothetical protein |
| TS28Clo00437/CDS/CDS         | 1.0 | 103.0 | 0.032 | NA | NA | hypothetical protein |
| TS28Fae13655/CDS/CDS         | 1.0 | 103.0 | 0.032 | NA | NA | hypothetical protein |
| TS28Clo01025/CDS/CDS         | 1.0 | 103.5 | 0.032 | NA | NA | hypothetical protein |
| TS28Clo10839/CDS/CDS         | 0.5 | 46.8  | 0.032 | NA | NA | hypothetical protein |
| FpraM2122280/CDS/CDS         | 0.2 | 21.0  | 0.031 | NA | NA | hypothetical protein |
| BVU2323/CDS Na+/glucose      | 0.5 | 52.5  | 0.031 | NA | NA | hypothetical protein |
| TS28Bac7919/CDS/CDS          | 0.5 | 53.0  | 0.031 | NA | NA | hypothetical protein |
| TS28Clo01210/CDS/CDS         | 1.0 | 106.5 | 0.031 | NA | NA | hypothetical protein |
| Cnex2347/CDS/CDS             | 0.2 | 17.8  | 0.031 | NA | NA | hypothetical protein |
| EUBREC1583/CDS ferrous       | 1.0 | 108.0 | 0.031 | NA | NA | hypothetical protein |
| TS29Fae04113/CDS/CDS         | 0.5 | 54.2  | 0.031 | NA | NA | hypothetical protein |
| TS28Eub8554/CDS/CDS          | 0.5 | 54.5  | 0.030 | NA | NA | hypothetical protein |
| EUBREC2148/CDS DNA           | 1.0 | 110.0 | 0.030 | NA | NA | hypothetical protein |
| TS28Bac6246/CDS/CDS          | 0.3 | 36.7  | 0.030 | NA | NA | hypothetical protein |
| RintL10500/CDS/CDS           | 0.2 | 25.6  | 0.030 | NA | NA | hypothetical protein |
| TS28Clo00544/CDS/CDS         | 1.0 | 111.0 | 0.030 | NA | NA | hypothetical protein |
| TS28Clo00904/CDS/CDS         | 1.0 | 111.0 | 0.030 | NA | NA | hypothetical protein |
| TS28Clo01613/CDS/CDS         | 1.0 | 111.0 | 0.030 | NA | NA | hypothetical protein |
| TS28Fae01810/CDS/CDS         | 1.0 | 111.0 | 0.030 | NA | NA | hypothetical protein |
| TS28Met1431/CDS/CDS          | 0.3 | 37.3  | 0.030 | NA | NA | hypothetical protein |
| EUBREC3489/CDS citrate       | 0.3 | 37.3  | 0.030 | NA | NA | hypothetical protein |
| Beonroc1108/CDS/CDS          | 0.1 | 8.6   | 0.030 | NA | NA | hypothetical protein |
| BFvch460145/CDS hypothetical | 0.1 | 8.6   | 0.030 | NA | NA | hypothetical protein |
| Bfra31120121/CDS/CDS         | 0.1 | 8.6   | 0.030 | NA | NA | hypothetical protein |
| Bste0893/CDS/CDS             | 0.1 | 8.6   | 0.030 | NA | NA | hypothetical protein |
| BWH20426/CDS/CDS             | 0.1 | 8.6   | 0.030 | NA | NA | hypothetical protein |
| Bple3091/CDS/CDS             | 0.1 | 8.6   | 0.030 | NA | NA | hypothetical protein |
| TS28Ali0488/CDS/CDS          | 0.1 | 8.6   | 0.030 | NA | NA | hypothetical protein |
| Bege2729/CDS/CDS             | 0.1 | 8.6   | 0.030 | NA | NA | hypothetical protein |
| BactD10619/CDS/CDS           | 0.1 | 8.6   | 0.030 | NA | NA | hypothetical protein |
| Bdor4450/CDS/CDS             | 0.1 | 8.6   | 0.030 | NA | NA | hypothetical protein |
| Bint0769/CDS/CDS             | 0.1 | 8.6   | 0.030 | NA | NA | hypothetical protein |
| Pmer0644/CDS/CDS             | 0.1 | 8.6   | 0.030 | NA | NA | hypothetical protein |
| TS28Fae11464/CDS/CDS         | 0.7 | 75.5  | 0.029 | NA | NA | hypothetical protein |
| Ceut2216/CDS/CDS             | 0.3 | 34.9  | 0.029 | NA | NA | hypothetical protein |
| TS28Fae17681/CDS/CDS         | 0.5 | 57.0  | 0.029 | NA | NA | hypothetical protein |
| Dfor3099/CDS/CDS             | 1.8 | 211.1 | 0.029 | NA | NA | hypothetical protein |
| TS29Fae09818/CDS/CDS         | 0.5 | 58.5  | 0.028 | NA | NA | hypothetical protein |
| TS28Clo00832/CDS/CDS         | 1.0 | 118.0 | 0.028 | NA | NA | hypothetical protein |
| Bean2523/CDS/CDS             | 0.1 | 14.8  | 0.028 | NA | NA | hypothetical protein |
| BVU0493/CDS putative         | 0.5 | 59.5  | 0.028 | NA | NA | hypothetical protein |
| CspL22633/CDS/CDS            | 0.2 | 27.5  | 0.028 | NA | NA | hypothetical protein |
| TS29Fae06839/CDS/CDS         | 0.5 | 60.0  | 0.028 | NA | NA | hypothetical protein |
| EUBREC1011/CDS arylsulfatase | 0.5 | 60.0  | 0.028 | NA | NA | hypothetical protein |
| TS28Clo10627/CDS/CDS         | 0.3 | 37.2  | 0.027 | NA | NA | hypothetical protein |
| TS28Clo01502/CDS/CDS         | 1.0 | 122.0 | 0.027 | NA | NA | hypothetical protein |
| TS28Fae19761/CDS/CDS         | 0.3 | 31.0  | 0.027 | NA | NA | hypothetical protein |
| TS28Clo01178/CDS/CDS         | 1.0 | 125.0 | 0.026 | NA | NA | hypothetical protein |
| TS29RumUnc1369/CDS/CDS       | 0.5 | 62.5  | 0.026 | NA | NA | hypothetical protein |
| Bsp1161254/CDS/CDS           | 0.3 | 42.0  | 0.026 | NA | NA | hypothetical protein |
| EUBREC0024/CDS hypothetical  | 0.5 | 64.0  | 0.026 | NA | NA | hypothetical protein |
| BVU1240/CDS succinate        | 0.5 | 64.0  | 0.026 | NA | NA | hypothetical protein |
| TS29Fae00933/CDS/CDS         | 0.5 | 66.0  | 0.025 | NA | NA | hypothetical protein |
| TS28Clo00558/CDS/CDS         | 1.0 | 133.0 | 0.025 | NA | NA | hypothetical protein |
| BFvch460147/CDS hypothetical | 0.1 | 19.0  | 0.025 | NA | NA | hypothetical protein |
| TS28Clo00870/CDS/CDS         | 2.0 | 267.0 | 0.025 | NA | NA | hypothetical protein |
| EUBREC0655/CDS type          | 0.5 | 68.5  | 0.024 | NA | NA | hypothetical protein |
| TS28Fae22121/CDS/CDS         | 0.5 | 69.0  | 0.024 | NA | NA | hypothetical protein |
| TS29Rum19572/CDS/CDS         | 0.3 | 46.0  | 0.024 | NA | NA | hypothetical protein |
| TS28Bac6628/CDS/CDS          | 0.3 | 46.3  | 0.024 | NA | NA | hypothetical protein |
| Rlac0829/CDS/CDS             | 0.5 | 70.0  | 0.024 | NA | NA | hypothetical protein |
| FpraM2121437/CDS/CDS         | 0.5 | 71.0  | 0.023 | NA | NA | hypothetical protein |

|                              |     |       |       |    |    |                      |
|------------------------------|-----|-------|-------|----|----|----------------------|
| BWH22274/CDS/CDS             | 0.3 | 47.5  | 0.023 | NA | NA | hypothetical protein |
| TS28Bac7818/CDS/CDS          | 0.5 | 72.5  | 0.023 | NA | NA | hypothetical protein |
| Cbol3090/CDS/CDS             | 0.3 | 46.4  | 0.022 | NA | NA | hypothetical protein |
| BL1199/CDS/fibronectin       | 0.3 | 38.2  | 0.022 | NA | NA | hypothetical protein |
| TS28Clo01083/CDS/CDS         | 3.0 | 459.0 | 0.022 | NA | NA | hypothetical protein |
| TS28Bac4701/CDS/CDS          | 0.3 | 38.3  | 0.022 | NA | NA | hypothetical protein |
| EUBREC2239/CDS/larginyl-tRNA | 0.5 | 78.0  | 0.021 | NA | NA | hypothetical protein |
| Bum2461/CDS/CDS              | 0.2 | 26.7  | 0.021 | NA | NA | hypothetical protein |
| TS29Clo4936/CDS/CDS          | 1.0 | 163.5 | 0.020 | NA | NA | hypothetical protein |
| TS29Bif3127/CDS/CDS          | 0.3 | 41.0  | 0.020 | NA | NA | hypothetical protein |
| BVU0853/CDS/hypothetical     | 0.4 | 59.1  | 0.020 | NA | NA | hypothetical protein |
| TS29RumUnc1298/CDS/CDS       | 1.0 | 170.8 | 0.019 | NA | NA | hypothetical protein |
| TS28Eub0316/CDS/CDS          | 1.0 | 171.0 | 0.019 | NA | NA | hypothetical protein |
| RintL13987/CDS/CDS           | 0.4 | 65.8  | 0.018 | NA | NA | hypothetical protein |
| EUBREC0667/CDS/putative      | 0.7 | 121.0 | 0.018 | NA | NA | hypothetical protein |
| TS29LacUnc129/CDS/CDS        | 0.1 | 22.8  | 0.018 | NA | NA | hypothetical protein |
| Even1751/CDS/CDS             | 0.1 | 12.2  | 0.018 | NA | NA | hypothetical protein |
| Robe3843/CDS/CDS             | 0.4 | 68.8  | 0.018 | NA | NA | hypothetical protein |
| TS28Eub8453/CDS/CDS          | 0.3 | 62.7  | 0.018 | NA | NA | hypothetical protein |
| TS28Clo01724/CDS/CDS         | 1.0 | 190.0 | 0.017 | NA | NA | hypothetical protein |
| TS28Dor2647/CDS/CDS          | 0.7 | 128.0 | 0.017 | NA | NA | hypothetical protein |
| EUBREC1072/CDS/hypothetical  | 0.8 | 160.0 | 0.017 | NA | NA | hypothetical protein |
| Ccom1795/CDS/CDS             | 0.4 | 74.7  | 0.016 | NA | NA | hypothetical protein |
| EUBREC0006/CDS/DNA           | 0.5 | 105.0 | 0.016 | NA | NA | hypothetical protein |
| Cnex1457/CDS/CDS             | 0.3 | 70.0  | 0.016 | NA | NA | hypothetical protein |
| TS28Eub0701/CDS/CDS          | 0.3 | 52.8  | 0.016 | NA | NA | hypothetical protein |
| Ebif1241/CDS/CDS             | 0.2 | 42.5  | 0.016 | NA | NA | hypothetical protein |
| Ccom0029/CDS/CDS             | 0.1 | 15.2  | 0.015 | NA | NA | hypothetical protein |
| TS29Fae06006/CDS/CDS         | 0.1 | 15.9  | 0.014 | NA | NA | hypothetical protein |
| EUBREC3569/CDS/hypothetical  | 0.2 | 48.1  | 0.014 | NA | NA | hypothetical protein |
| FpraM2121402/CDS/CDS         | 0.5 | 131.2 | 0.013 | NA | NA | hypothetical protein |
| Robe3842/CDS/CDS             | 0.2 | 62.4  | 0.011 | NA | NA | hypothetical protein |
| Cbar1018/CDS/CDS             | 0.7 | 241.0 | 0.009 | NA | NA | hypothetical protein |
| Rrna2287/CDS/CDS             | 0.2 | 88.7  | 0.007 | NA | NA | hypothetical protein |
| Bste3181/CDS/CDS             | 0.1 | 23.3  | 0.007 | NA | NA | hypothetical protein |
| Ccom1796/CDS/CDS             | 0.2 | 97.3  | 0.007 | NA | NA | hypothetical protein |
| CspSS22982/CDS/CDS           | 0.2 | 86.2  | 0.006 | NA | NA | hypothetical protein |
| CspSS22981/CDS/CDS           | 0.2 | 141.0 | 0.005 | NA | NA | hypothetical protein |
| EUBREC3483/CDS/hypothetical  | 0.1 | 53.7  | 0.004 | NA | NA | hypothetical protein |



**Table S12: Genes with high or low relative expression in the TS29 fecal meta-transcriptome.**

| Gene                         | cDNA sequences | DNA sequences | Ratio | COG categories | COGs                                | COG Annotations                                                                                                                                                                                                                                                                                         |
|------------------------------|----------------|---------------|-------|----------------|-------------------------------------|---------------------------------------------------------------------------------------------------------------------------------------------------------------------------------------------------------------------------------------------------------------------------------------------------------|
| TS29Bif3929 CDS CDS          | 0.4            | 23.2          | 0.1   | A              | COG1949                             | Oligoribonuclease (3'->5' exoribonuclease)                                                                                                                                                                                                                                                              |
| TS28Bif0658 CDS CDS          | 0.4            | 23.2          | 0.1   | A              | COG1949                             | Oligoribonuclease (3'->5' exoribonuclease)                                                                                                                                                                                                                                                              |
| BL1723 CDS oligoribonuclease | 0.4            | 23.2          | 0.1   | A              | COG1949                             | Oligoribonuclease (3'->5' exoribonuclease)                                                                                                                                                                                                                                                              |
| Msmi750160 CDS CDS           | 9.5            | 0.5           | 86.3  | B              | COG2036                             | Histones H3 and H4                                                                                                                                                                                                                                                                                      |
| Bsp1160960 CDS CDS           | 22.0           | 0.2           | 600.0 | C              | COG1014 COG1013 <br>COG0674         | Pyruvate:ferredoxin oxidoreductase and related 2-oxoacid:ferredoxin oxidoreductases, gamma subunit Pyruvate:ferredoxin oxidoreductase and related 2-oxoacid:ferredoxin oxidoreductases, beta subunit Pyruvate:ferredoxin oxidoreductase and related 2-oxoacid:ferredoxin oxidoreductases, alpha subunit |
| Bthe3734721 CDS CDS          | 21.4           | 0.2           | 583.0 | C              | COG1014 COG1013 <br>COG0674         | Pyruvate:ferredoxin oxidoreductase and related 2-oxoacid:ferredoxin oxidoreductases, gamma subunit Pyruvate:ferredoxin oxidoreductase and related 2-oxoacid:ferredoxin oxidoreductases, beta subunit Pyruvate:ferredoxin oxidoreductase and related 2-oxoacid:ferredoxin oxidoreductases, alpha subunit |
| Bthe7331302 CDS CDS          | 20.9           | 0.2           | 568.1 | C              | COG1014 COG1013 <br>COG0674         | Pyruvate:ferredoxin oxidoreductase and related 2-oxoacid:ferredoxin oxidoreductases, gamma subunit Pyruvate:ferredoxin oxidoreductase and related 2-oxoacid:ferredoxin oxidoreductases, beta subunit Pyruvate:ferredoxin oxidoreductase and related 2-oxoacid:ferredoxin oxidoreductases, alpha subunit |
| Bthe7330297 CDS CDS          | 98.1           | 1.1           | 411.1 | C              | COG1866                             | Phosphoenolpyruvate carboxykinase (ATP)                                                                                                                                                                                                                                                                 |
| Bthe3731370 CDS CDS          | 98.1           | 1.1           | 411.1 | C              | COG1866                             | Phosphoenolpyruvate carboxykinase (ATP)                                                                                                                                                                                                                                                                 |
| Bsp1162970 CDS CDS           | 63.6           | 0.8           | 384.8 | C              | COG1866                             | Phosphoenolpyruvate carboxykinase (ATP)                                                                                                                                                                                                                                                                 |
| TS29Bac01465 CDS CDS         | 81.0           | 1.0           | 367.7 | C              | COG1773 COG1853 <br>COG2025 COG1592 | Rubredoxin Conserved protein/domain typically associated with flavoprotein oxygenases, DIM6/NTAB family Electron transfer flavoprotein, alpha subunit Rubrerythrin                                                                                                                                      |
| Bova1491 CDS CDS             | 6.3            | 0.2           | 143.1 | C              | COG1866                             | Phosphoenolpyruvate carboxykinase (ATP)                                                                                                                                                                                                                                                                 |
| Buni2102 CDS CDS             | 10.3           | 0.3           | 140.7 | C              | COG0055                             | F0F1-type ATP synthase, beta subunit                                                                                                                                                                                                                                                                    |
| BactD23071 CDS CDS           | 5.1            | 0.2           | 115.0 | C              | COG1866                             | Phosphoenolpyruvate carboxykinase (ATP)                                                                                                                                                                                                                                                                 |
| TS28Eub5382 CDS CDS          | 11.5           | 0.5           | 104.4 | C              | COG1454                             | Alcohol dehydrogenase, class IV                                                                                                                                                                                                                                                                         |
| BactD11821 CDS CDS           | 10.9           | 0.5           | 99.3  | C              | COG0711                             | F0F1-type ATP synthase, subunit b                                                                                                                                                                                                                                                                       |
| TS28Met1185 CDS CDS          | 10.9           | 0.5           | 99.3  | C              | COG3383 COG0243                     | Uncharacterized anaerobic dehydrogenase Anaerobic dehydrogenases, typically selenocysteine-containing                                                                                                                                                                                                   |
| BT2414 CDS ferredoxin        | 20.3           | 1.0           | 91.9  | C              | COG1145 COG5015                     | ferredoxin Uncharacterized conserved protein                                                                                                                                                                                                                                                            |
| Bxyl0243 CDS CDS             | 12.9           | 0.7           | 88.1  | C              | COG0056                             | F0F1-type ATP synthase, alpha subunit                                                                                                                                                                                                                                                                   |
| TS28Rum1177 CDS CDS          | 8.0            | 0.5           | 72.6  | C              | COG0224                             | F0F1-type ATP synthase, gamma subunit                                                                                                                                                                                                                                                                   |
| TS28Fae15025 CDS CDS         | 7.5            | 0.5           | 68.1  | C              | COG1592                             | Rubrerythrin                                                                                                                                                                                                                                                                                            |
| TS28Fae12704 CDS CDS         | 29.5           | 2.0           | 66.9  | C              | COG1014 COG1013                     | Pyruvate:ferredoxin oxidoreductase and related 2-oxoacid:ferredoxin oxidoreductases, gamma subunit Pyruvate:ferredoxin oxidoreductase and related 2-oxoacid:ferredoxin oxidoreductases, beta subunit                                                                                                    |
| Buni0328 CDS CDS             | 19.0           | 1.3           | 64.7  | C              | COG0039                             | Malate/lactate dehydrogenases                                                                                                                                                                                                                                                                           |
| TS28Clo03297 CDS CDS         | 7.0            | 0.5           | 63.6  | C              | COG1592                             | Rubrerythrin                                                                                                                                                                                                                                                                                            |
| Msmi740998 CDS CDS           | 3.5            | 0.3           | 62.6  | C              | COG0479 COG2048                     | Succinate dehydrogenase/fumarate reductase, Fe-S protein subunit Heterodisulfide reductase, subunit B                                                                                                                                                                                                   |
| TS29Rum10999 CDS CDS         | 25.0           | 2.0           | 56.7  | C              | COG2086                             | Electron transfer flavoprotein, beta subunit                                                                                                                                                                                                                                                            |
| Bxyl3870 CDS CDS             | 6.2            | 0.5           | 56.0  | C              | COG1592                             | Rubrerythrin                                                                                                                                                                                                                                                                                            |
| BactD14279 CDS CDS           | 6.2            | 0.5           | 55.8  | C              | COG1014 COG0674                     | Pyruvate:ferredoxin oxidoreductase and related 2-oxoacid:ferredoxin oxidoreductases, gamma subunit Pyruvate:ferredoxin oxidoreductase and related 2-oxoacid:ferredoxin oxidoreductases, alpha subunit                                                                                                   |
| Msmi740377 CDS CDS           | 5.5            | 0.5           | 55.5  | C              | COG3383 COG0243 <br>COG1029         | Uncharacterized anaerobic dehydrogenase Anaerobic dehydrogenases, typically selenocysteine-containing Formylmethanofuran dehydrogenase subunit B                                                                                                                                                        |
| FpraM2120466 CDS CDS         | 6.0            | 0.5           | 54.5  | C              | COG0224                             | F0F1-type ATP synthase, gamma subunit                                                                                                                                                                                                                                                                   |
| TS29Met0433 CDS CDS          | 23.1           | 2.0           | 52.3  | C              | COG0680                             | Ni,Fe-hydrogenase maturation factor                                                                                                                                                                                                                                                                     |
| TS28Rum11773 CDS CDS         | 5.7            | 0.5           | 51.8  | C              | COG0711                             | F0F1-type ATP synthase, subunit b                                                                                                                                                                                                                                                                       |
| Aput0333 CDS CDS             | 21.5           | 2.0           | 48.8  | C              | COG1014 COG0674                     | Pyruvate:ferredoxin oxidoreductase and related 2-oxoacid:ferredoxin oxidoreductases, gamma subunit Pyruvate:ferredoxin oxidoreductase and related 2-oxoacid:ferredoxin oxidoreductases, alpha subunit                                                                                                   |
| Msmi740380 CDS CDS           | 4.8            | 0.5           | 48.4  | C              | COG1145                             | ferredoxin                                                                                                                                                                                                                                                                                              |
| Bthe3734372 CDS CDS          | 10.6           | 1.0           | 48.0  | C              | COG1882                             | Pyruvate-formate lyase                                                                                                                                                                                                                                                                                  |
| Bhan2746 CDS CDS             | 10.5           | 1.0           | 47.7  | C              | COG1014 COG1013 <br>COG0674         | Pyruvate:ferredoxin oxidoreductase and related 2-oxoacid:ferredoxin oxidoreductases, gamma subunit Pyruvate:ferredoxin oxidoreductase and related 2-oxoacid:ferredoxin oxidoreductases, beta subunit Pyruvate:ferredoxin oxidoreductase and related 2-oxoacid:ferredoxin oxidoreductases, alpha subunit |
| Bova1292 CDS CDS             | 41.0           | 4.0           | 46.5  | C              | COG1145                             | ferredoxin                                                                                                                                                                                                                                                                                              |
| TS28Met0338 CDS CDS          | 10.0           | 1.0           | 45.4  | C              | COG2141                             | Coenzyme F420-dependent N5,N10-methylene tetrahydromethanopterin reductase and related flavin-dependent oxidoreductases                                                                                                                                                                                 |
| TS28Rum15623 CDS CDS         | 19.2           | 2.0           | 43.5  | C              | COG4656                             | Predicted NADH:ubiquinone oxidoreductase, subunit RnfC                                                                                                                                                                                                                                                  |
| Pmer2049 CDS CDS             | 3.1            | 0.3           | 41.6  | C              | COG1014 COG1013 <br>COG0674         | Pyruvate:ferredoxin oxidoreductase and related 2-oxoacid:ferredoxin oxidoreductases, gamma subunit Pyruvate:ferredoxin oxidoreductase and related 2-oxoacid:ferredoxin oxidoreductases, beta subunit Pyruvate:ferredoxin oxidoreductase and related 2-oxoacid:ferredoxin oxidoreductases, alpha subunit |
| TS28Clo07501 CDS CDS         | 9.0            | 1.0           | 40.9  | C              | COG0778                             | Nitroreductase                                                                                                                                                                                                                                                                                          |
| Cbol3480 CDS CDS             | 9.0            | 1.0           | 40.9  | C              | COG0355                             | F0F1-type ATP synthase, epsilon subunit (mitochondrial delta subunit)                                                                                                                                                                                                                                   |
| Bfin3327 CDS CDS             | 13.3           | 1.5           | 40.4  | C              | COG5016 COG1038                     | Pyruvate:oxaloacetate carboxyltransferase Pyruvate carboxylase                                                                                                                                                                                                                                          |
| Rumhyd2691 CDS CDS           | 8.7            | 1.0           | 39.3  | C              | COG1456                             | CO dehydrogenase/acetyl-CoA synthase gamma subunit (corrinoid Fe-S protein)                                                                                                                                                                                                                             |
| Rlac1178 CDS CDS             | 8.6            | 1.0           | 39.1  | C              | COG1014 COG1013 <br>COG0674         | Pyruvate:ferredoxin oxidoreductase and related 2-oxoacid:ferredoxin oxidoreductases, gamma subunit Pyruvate:ferredoxin oxidoreductase and related 2-oxoacid:ferredoxin oxidoreductases, beta subunit Pyruvate:ferredoxin oxidoreductase and related 2-oxoacid:ferredoxin oxidoreductases, alpha subunit |
| TS29Met0501 CDS CDS          | 1.7            | 0.2           | 37.5  | C              | COG1035 COG1145                     | Coenzyme F420-reducing hydrogenase, beta subunit ferredoxin                                                                                                                                                                                                                                             |
| Buni2911 CDS CDS             | 12.2           | 1.5           | 36.8  | C              | COG1951 COG1838                     | Tartrate dehydratase alpha subunit Fumarate hydratase class I, N-terminal domain Tartrate dehydratase beta subunit Fumarate hydratase class I, C-terminal domain                                                                                                                                        |
| TS28Fae22603 CDS CDS         | 36.2           | 4.5           | 36.6  | C              | COG1866                             | Phosphoenolpyruvate carboxykinase (ATP)                                                                                                                                                                                                                                                                 |
| Rtor1001 CDS CDS             | 28.0           | 3.5           | 36.3  | C              | COG1454                             | Alcohol dehydrogenase, class IV                                                                                                                                                                                                                                                                         |
| Msmi751594 CDS CDS           | 1.6            | 0.2           | 36.3  | C              | COG1390                             | Archaeal/vacuolar-type H <sup>+</sup> -ATPase subunit E                                                                                                                                                                                                                                                 |
| BFvch46450 CDS rubredoxin    | 8.0            | 1.0           | 36.3  | C              | COG1773                             | Rubredoxin                                                                                                                                                                                                                                                                                              |

|                      |      |      |      |   |                                 |                                                                                                                                                                                                                                                                                                         |
|----------------------|------|------|------|---|---------------------------------|---------------------------------------------------------------------------------------------------------------------------------------------------------------------------------------------------------------------------------------------------------------------------------------------------------|
| Svar2374 CDS CDS     | 8.0  | 1.0  | 36.2 | C | COG2086 COG2025                 | Electron transfer flavoprotein, beta subunit Electron transfer flavoprotein, alpha subunit                                                                                                                                                                                                              |
| TS28Fae08859 CDS CDS | 23.7 | 3.0  | 35.8 | C | COG1592                         | Rubryerthrin                                                                                                                                                                                                                                                                                            |
| Eeli1407 CDS CDS     | 7.9  | 1.0  | 35.7 | C | COG1866                         | Phosphoenolpyruvate carboxykinase (ATP)                                                                                                                                                                                                                                                                 |
| Bfin2282 CDS CDS     | 1.9  | 0.3  | 34.8 | C | COG0039                         | Malate/lactate dehydrogenases                                                                                                                                                                                                                                                                           |
| Svar1559 CDS CDS     | 3.8  | 0.5  | 34.8 | C | COG1882                         | Pyruvate-formate lyase                                                                                                                                                                                                                                                                                  |
| TS28Met0352 CDS CDS  | 10.0 | 1.3  | 34.0 | C | COG3259 COG0374                 | Coenzyme F420-reducing hydrogenase, alpha subunit Ni,Fe-hydrogenase I large subunit                                                                                                                                                                                                                     |
| TS28Fae18580 CDS CDS | 30.0 | 4.0  | 34.0 | C | COG2025 COG2086                 | Electron transfer flavoprotein, alpha subunit Electron transfer flavoprotein, beta subunit                                                                                                                                                                                                              |
| TS28Fae12038 CDS CDS | 7.5  | 1.0  | 34.0 | C | COG2878                         | Predicted NADH:ubiquinone oxidoreductase, subunit RnfB                                                                                                                                                                                                                                                  |
| TS28Fae15052 CDS CDS | 18.5 | 2.5  | 33.6 | C | COG0056                         | F0F1-type ATP synthase, alpha subunit                                                                                                                                                                                                                                                                   |
| TS28Rum13674 CDS CDS | 75.3 | 10.5 | 32.5 | C | COG1151                         | 6Fe-6S prismatic cluster-containing protein                                                                                                                                                                                                                                                             |
| TS29Bac10233 CDS CDS | 2.3  | 0.3  | 31.8 | C | COG1454                         | Alcohol dehydrogenase, class IV                                                                                                                                                                                                                                                                         |
| Bxyl4312 CDS CDS     | 1.8  | 0.3  | 31.8 | C | COG5016 COG1038                 | Pyruvate/oxaloacetate carboxyltransferase Pyruvate carboxylase                                                                                                                                                                                                                                          |
| Cste1580 CDS CDS     | 7.0  | 1.0  | 31.8 | C | COG1014 COG1013 COG0674         | Pyruvate:ferredoxin oxidoreductase and related 2-oxoacid:ferredoxin oxidoreductases, gamma subunit Pyruvate:ferredoxin oxidoreductase and related 2-oxoacid:ferredoxin oxidoreductases, beta subunit Pyruvate:ferredoxin oxidoreductase and related 2-oxoacid:ferredoxin oxidoreductases, alpha subunit |
| Cint819 CDS CDS      | 7.0  | 1.0  | 31.8 | C | COG1014 COG1013 COG0674         | Pyruvate:ferredoxin oxidoreductase and related 2-oxoacid:ferredoxin oxidoreductases, gamma subunit Pyruvate:ferredoxin oxidoreductase and related 2-oxoacid:ferredoxin oxidoreductases, beta subunit Pyruvate:ferredoxin oxidoreductase and related 2-oxoacid:ferredoxin oxidoreductases, alpha subunit |
| Msmi740445 CDS CDS   | 12.7 | 1.8  | 31.4 | C | COG1148 COG1908                 | Heterodisulfide reductase, subunit A and related polyferredoxins Coenzyme F420-reducing hydrogenase, delta subunit                                                                                                                                                                                      |
| Cbol4815 CDS CDS     | 20.5 | 3.0  | 31.0 | C | COG0554                         | Glycerol kinase                                                                                                                                                                                                                                                                                         |
| TS28Clo06647 CDS CDS | 23.7 | 3.5  | 30.7 | C | COG1882                         | Pyruvate-formate lyase                                                                                                                                                                                                                                                                                  |
| TS29Clo4495 CDS CDS  | 27.0 | 4.0  | 30.6 | C | COG0277                         | FAD/FMN-containing dehydrogenases                                                                                                                                                                                                                                                                       |
| TS28Fae20658 CDS CDS | 33.2 | 5.0  | 30.1 | C | COG1592                         | Rubryerthrin                                                                                                                                                                                                                                                                                            |
| Msmi750889 CDS CDS   | 14.3 | 2.2  | 30.0 | C | COG0374 COG3259                 | Ni,Fe-hydrogenase I large subunit Coenzyme F420-reducing hydrogenase, alpha subunit                                                                                                                                                                                                                     |
| TS28Met1193 CDS CDS  | 5.0  | 0.8  | 29.0 | C | COG3383 COG0243 COG1029         | Uncharacterized anaerobic dehydrogenase Anaerobic dehydrogenases, typically selenocysteine-containing Formylmethanofuran dehydrogenase subunit B                                                                                                                                                        |
| Buni3129 CDS CDS     | 2.0  | 0.3  | 27.2 | C | COG1013                         | Pyruvate:ferredoxin oxidoreductase and related 2-oxoacid:ferredoxin oxidoreductases, beta subunit                                                                                                                                                                                                       |
| Bxyl0686 CDS CDS     | 2.0  | 0.3  | 27.2 | C | COG1294                         | Cytochrome bd-type quinol oxidase, subunit 2                                                                                                                                                                                                                                                            |
| TS28Bac7205 CDS CDS  | 2.0  | 0.3  | 27.2 | C | COG1013                         | Pyruvate:ferredoxin oxidoreductase and related 2-oxoacid:ferredoxin oxidoreductases, beta subunit                                                                                                                                                                                                       |
| BactD21003 CDS CDS   | 6.0  | 1.0  | 27.2 | C | COG0372                         | Citrate synthase                                                                                                                                                                                                                                                                                        |
| TS28Clo04378 CDS CDS | 6.0  | 1.0  | 27.2 | C | COG1032                         | Fe-S oxidoreductase                                                                                                                                                                                                                                                                                     |
| TS28Rum03156 CDS CDS | 3.0  | 0.5  | 27.2 | C | COG1614                         | CO dehydrogenase/acetyl-CoA synthase beta subunit                                                                                                                                                                                                                                                       |
| Msmi741088 CDS CDS   | 1.5  | 0.3  | 27.2 | C | COG1151                         | 6Fe-6S prismatic cluster-containing protein                                                                                                                                                                                                                                                             |
| TS28Rum13667 CDS CDS | 3.0  | 0.5  | 27.2 | C | COG0240                         | Glycerol-3-phosphate dehydrogenase                                                                                                                                                                                                                                                                      |
| TS29Rum09446 CDS CDS | 6.0  | 1.0  | 27.2 | C | COG0636                         | F0F1-type ATP synthase, subunit c Archaeal/vacuolar-type H+-ATPase, subunit K                                                                                                                                                                                                                           |
| Ehal0970 CDS CDS     | 15.0 | 2.5  | 27.2 | C | COG0554                         | Glycerol kinase                                                                                                                                                                                                                                                                                         |
| Rumhyd1742 CDS CDS   | 6.0  | 1.0  | 27.2 | C | COG4231                         | Indolepyruvate ferredoxin oxidoreductase, alpha and beta subunits                                                                                                                                                                                                                                       |
| Caer2168 CDS CDS     | 3.0  | 0.5  | 27.2 | C | COG0711                         | F0F1-type ATP synthase, subunit b                                                                                                                                                                                                                                                                       |
| ShispD92089 CDS CDS  | 6.0  | 1.0  | 27.2 | C | COG1012                         | NAD-dependent aldehyde dehydrogenases                                                                                                                                                                                                                                                                   |
| TS28Bac1044 CDS CDS  | 8.0  | 1.3  | 27.2 | C | COG0039                         | Malate/lactate dehydrogenases                                                                                                                                                                                                                                                                           |
| Bxyl1299 CDS CDS     | 1.2  | 0.2  | 27.1 | C | COG2086                         | Electron transfer flavoprotein, beta subunit                                                                                                                                                                                                                                                            |
| Rtor0314 CDS CDS     | 11.5 | 2.0  | 26.1 | C | COG1592                         | Rubryerthrin                                                                                                                                                                                                                                                                                            |
| Buni1043 CDS CDS     | 11.5 | 2.0  | 26.1 | C | COG1014 COG1013                 | Pyruvate:ferredoxin oxidoreductase and related 2-oxoacid:ferredoxin oxidoreductases, gamma subunit Pyruvate:ferredoxin oxidoreductase and related 2-oxoacid:ferredoxin oxidoreductases, beta subunit                                                                                                    |
| TS28Bac6799 CDS CDS  | 18.5 | 3.3  | 25.2 | C | COG0055                         | F0F1-type ATP synthase, beta subunit                                                                                                                                                                                                                                                                    |
| Acae3064 CDS CDS     | 5.5  | 1.0  | 25.0 | C | COG1592                         | Rubryerthrin                                                                                                                                                                                                                                                                                            |
| TS28Bac0410 CDS CDS  | 3.7  | 0.7  | 25.0 | C | COG3808                         | Inorganic pyrophosphatase                                                                                                                                                                                                                                                                               |
| Msmi740795 CDS CDS   | 2.8  | 0.5  | 25.0 | C | COG1145                         | Ferredoxin                                                                                                                                                                                                                                                                                              |
| Cbol1760 CDS CDS     | 11.0 | 2.0  | 25.0 | C | COG0372                         | Citrate synthase                                                                                                                                                                                                                                                                                        |
| TS29Met0432 CDS CDS  | 21.8 | 4.0  | 24.7 | C | COG3259 COG0374                 | Coenzyme F420-reducing hydrogenase, alpha subunit Ni,Fe-hydrogenase I large subunit                                                                                                                                                                                                                     |
| TS29Rum08442 CDS CDS | 16.0 | 3.0  | 24.2 | C | COG1454 COG1012                 | Alcohol dehydrogenase, class IV NAD-dependent aldehyde dehydrogenases                                                                                                                                                                                                                                   |
| TS28Bac2658 CDS CDS  | 12.4 | 2.3  | 24.2 | C | COG0056                         | F0F1-type ATP synthase, alpha subunit                                                                                                                                                                                                                                                                   |
| Bam2099 CDS CDS      | 12.4 | 2.3  | 24.2 | C | COG0056                         | F0F1-type ATP synthase, alpha subunit                                                                                                                                                                                                                                                                   |
| TS29Met0212 CDS CDS  | 1.1  | 0.2  | 23.8 | C | COG1390                         | Archaeal/vacuolar-type H+-ATPase subunit E                                                                                                                                                                                                                                                              |
| Msmi751230 CDS CDS   | 13.0 | 2.5  | 23.7 | C | COG1148 COG1908                 | Heterodisulfide reductase, subunit A and related polyferredoxins Coenzyme F420-reducing hydrogenase, delta subunit                                                                                                                                                                                      |
| Begg1665 CDS CDS     | 5.2  | 1.0  | 23.6 | C | COG1014 COG1013 COG0674         | Pyruvate:ferredoxin oxidoreductase and related 2-oxoacid:ferredoxin oxidoreductases, gamma subunit Pyruvate:ferredoxin oxidoreductase and related 2-oxoacid:ferredoxin oxidoreductases, beta subunit Pyruvate:ferredoxin oxidoreductase and related 2-oxoacid:ferredoxin oxidoreductases, alpha subunit |
| Rumhyd1810 CDS CDS   | 15.5 | 3.0  | 23.5 | C | COG1894 COG4656                 | NADH:ubiquinone oxidoreductase, NADH-binding (51 kD) subunit Predicted NADH:ubiquinone oxidoreductase, subunit RnfC                                                                                                                                                                                     |
| Bcap2157 CDS CDS     | 10.3 | 2.0  | 23.3 | C | COG4624 COG3383 COG1034 COG0243 | Iron only hydrogenase large subunit, C-terminal domain Uncharacterized anaerobic dehydrogenase NADH dehydrogenase/NADH:ubiquinone oxidoreductase 75 kD subunit (chain G) Anaerobic dehydrogenases, typically selenocysteine-containing                                                                  |
| Cspl21837 CDS CDS    | 1.7  | 0.3  | 22.7 | C | COG2033                         | Desulfoferredoxin                                                                                                                                                                                                                                                                                       |
| TS29Clo3088 CDS CDS  | 10.0 | 2.0  | 22.7 | C | COG1319                         | Aerobic-type carbon monoxide dehydrogenase, middle subunit CoxM/CutM homologs                                                                                                                                                                                                                           |
| Cbol10145 CDS CDS    | 5.0  | 1.0  | 22.7 | C | COG1014 COG1146 COG4231         | Pyruvate:ferredoxin oxidoreductase and related 2-oxoacid:ferredoxin oxidoreductases, gamma subunit Ferredoxin Indolepyruvate ferredoxin oxidoreductase, alpha and beta subunits                                                                                                                         |
| Cspi1525 CDS CDS     | 5.0  | 1.0  | 22.7 | C | COG4624 COG3383 COG1034 COG0243 | Iron only hydrogenase large subunit, C-terminal domain Uncharacterized anaerobic dehydrogenase NADH dehydrogenase/NADH:ubiquinone oxidoreductase 75 kD subunit (chain G) Anaerobic dehydrogenases, typically selenocysteine-containing                                                                  |
| TS28Rum16120 CDS CDS | 2.5  | 0.5  | 22.7 | C | COG1145                         | Ferredoxin                                                                                                                                                                                                                                                                                              |
| Aput0085 CDS CDS     | 5.0  | 1.0  | 22.7 | C | COG2878                         | Predicted NADH:ubiquinone oxidoreductase, subunit RnfB                                                                                                                                                                                                                                                  |
| TS28Rum04448 CDS CDS | 2.5  | 0.5  | 22.7 | C | COG0538                         | Isocitrate dehydrogenases                                                                                                                                                                                                                                                                               |

|                      |       |      |      |   |                         |                                                                                                                                                                                                                                                                                                         |
|----------------------|-------|------|------|---|-------------------------|---------------------------------------------------------------------------------------------------------------------------------------------------------------------------------------------------------------------------------------------------------------------------------------------------------|
| Chv12945 CDS CDS     | 5.0   | 1.0  | 22.7 | C | COG4656                 | Predicted NADH:ubiquinone oxidoreductase, subunit RnfC                                                                                                                                                                                                                                                  |
| Dlon2331 CDS CDS     | 5.0   | 1.0  | 22.7 | C | COG0822                 | NiRu homolog involved in Fe-S cluster formation                                                                                                                                                                                                                                                         |
| Rtor1059 CDS CDS     | 2.5   | 0.5  | 22.7 | C | COG1145                 | Ferredoxin                                                                                                                                                                                                                                                                                              |
| Csvm1861 CDS CDS     | 5.0   | 1.0  | 22.7 | C | COG5016 COG1038         | Pyruvate/oxaloacetate carboxyltransferase Pyruvate carboxylase                                                                                                                                                                                                                                          |
| ShigspD90775 CDS CDS | 4.9   | 1.0  | 22.3 | C | COG2055                 | Malate/L-lactate dehydrogenases                                                                                                                                                                                                                                                                         |
| TS28Clo10641 CDS CDS | 129.0 | 26.5 | 22.1 | C | COG1882                 | Pyruvate-formate lyase                                                                                                                                                                                                                                                                                  |
| Clep2055 CDS CDS     | 9.5   | 2.0  | 21.6 | C | COG1894 COG3411         | NADH:ubiquinone oxidoreductase, NADH-binding (51 kD) subunit Ferredoxin                                                                                                                                                                                                                                 |
| Msmi751592 CDS CDS   | 6.8   | 1.5  | 21.3 | C | COG1269                 | Archaeal/vacuolar-type H <sup>+</sup> -ATPase subunit I                                                                                                                                                                                                                                                 |
| BactD10568 CDS CDS   | 2.3   | 0.5  | 21.2 | C | COG0074                 | Succinyl-CoA synthetase, alpha subunit                                                                                                                                                                                                                                                                  |
| Aput0035 CDS CDS     | 23.0  | 5.0  | 20.9 | C | COG1014 COG0674         | Pyruvate:ferredoxin oxidoreductase and related 2-oxoacid:ferredoxin oxidoreductases, gamma subunit Pyruvate:ferredoxin oxidoreductase and related 2-oxoacid:ferredoxin oxidoreductases, alpha subunit                                                                                                   |
| Msmi751292 CDS CDS   | 11.3  | 2.5  | 20.5 | C | COG3383 COG0243         | Uncharacterized anaerobic dehydrogenase Anaerobic dehydrogenases, typically selenocysteine-containing                                                                                                                                                                                                   |
| Msmi740385 CDS CDS   | 11.3  | 2.5  | 20.5 | C | COG3383 COG0243         | Uncharacterized anaerobic dehydrogenase Anaerobic dehydrogenases, typically selenocysteine-containing                                                                                                                                                                                                   |
| Bova3369 CDS CDS     | 1.5   | 0.3  | 20.4 | C | COG1883                 | Na <sup>+</sup> -transporting methylmalonyl-CoA/oxaloacetate decarboxylase, beta subunit                                                                                                                                                                                                                |
| Bxyl4311 CDS CDS     | 1.5   | 0.3  | 20.4 | C | COG1883                 | Na <sup>+</sup> -transporting methylmalonyl-CoA/oxaloacetate decarboxylase, beta subunit                                                                                                                                                                                                                |
| TS29Bac09081 CDS CDS | 1.5   | 0.3  | 20.4 | C | COG1048                 | Aconitase A                                                                                                                                                                                                                                                                                             |
| Bxyl3889 CDS CDS     | 2.3   | 0.5  | 20.4 | C | COG1032                 | Fe-S oxidoreductase                                                                                                                                                                                                                                                                                     |
| Bcel4637 CDS CDS     | 2.2   | 0.5  | 20.3 | C | COG1014 COG1013 COG0674 | Pyruvate:ferredoxin oxidoreductase and related 2-oxoacid:ferredoxin oxidoreductases, gamma subunit Pyruvate:ferredoxin oxidoreductase and related 2-oxoacid:ferredoxin oxidoreductases, beta subunit Pyruvate:ferredoxin oxidoreductase and related 2-oxoacid:ferredoxin oxidoreductases, alpha subunit |
| TS28Rum11189 CDS CDS | 46.3  | 10.5 | 20.0 | C | COG0280 COG0857         | Phosphotransacetylase BioD-like N-terminal domain of phosphotransacetylase                                                                                                                                                                                                                              |
| Msmi740097 CDS CDS   | 2.4   | 0.5  | 20.0 | C | COG1390                 | Archaeal/vacuolar-type H <sup>+</sup> -ATPase subunit E                                                                                                                                                                                                                                                 |
| TS28Met1780 CDS CDS  | 2.4   | 0.5  | 20.0 | C | COG1390                 | Archaeal/vacuolar-type H <sup>+</sup> -ATPase subunit E                                                                                                                                                                                                                                                 |
| Bxyl1082 CDS CDS     | 2.2   | 0.5  | 19.7 | C | COG1048                 | Aconitase A                                                                                                                                                                                                                                                                                             |
| TS28Rum04663 CDS CDS | 4.3   | 1.0  | 19.7 | C | COG0056                 | F0F1-type ATP synthase, alpha subunit                                                                                                                                                                                                                                                                   |
| Msmi751299 CDS CDS   | 4.3   | 1.0  | 19.5 | C | COG1153                 | Formylmethanofuran dehydrogenase subunit D                                                                                                                                                                                                                                                              |
| TS28Rum15925 CDS CDS | 23.3  | 5.5  | 19.2 | C | COG1894 COG1905         | NADH:ubiquinone oxidoreductase, NADH-binding (51 kD) subunit NADH:ubiquinone oxidoreductase 24 kD subunit                                                                                                                                                                                               |
| TS28Rum02367 CDS CDS | 56.1  | 13.5 | 18.9 | C | COG1454 COG1012         | Alcohol dehydrogenase, class IV NAD-dependent aldehyde dehydrogenases                                                                                                                                                                                                                                   |
| Buni1798 CDS CDS     | 18.3  | 4.5  | 18.5 | C | COG5016 COG1038         | Pyruvate/oxaloacetate carboxyltransferase Pyruvate carboxylase                                                                                                                                                                                                                                          |
| TS28Met1385 CDS CDS  | 4.1   | 1.0  | 18.4 | C | COG0680                 | Ni-Fe-hydrogenase maturation factor                                                                                                                                                                                                                                                                     |
| TS29Rum19013 CDS CDS | 64.5  | 16.0 | 18.3 | C | COG2069                 | CO dehydrogenase/acetyl-CoA synthase delta subunit (corrinoid Fe-S protein)                                                                                                                                                                                                                             |
| TS29Bac00722 CDS CDS | 20.0  | 5.0  | 18.2 | C | COG0711                 | F0F1-type ATP synthase, subunit b                                                                                                                                                                                                                                                                       |
| Msmi740376 CDS CDS   | 8.8   | 2.2  | 18.2 | C | COG1229                 | Formylmethanofuran dehydrogenase subunit A                                                                                                                                                                                                                                                              |
| Msmi740096 CDS CDS   | 1.0   | 0.3  | 18.2 | C | COG0636                 | F0F1-type ATP synthase, subunit c Archaeal/vacuolar-type H <sup>+</sup> -ATPase, subunit K                                                                                                                                                                                                              |
| Rumhyd0090 CDS CDS   | 4.0   | 1.0  | 18.2 | C | COG1951                 | Tartrate dehydratase alpha subunit/Fumarate hydratase class I, N-terminal domain                                                                                                                                                                                                                        |
| TS28Clo05768 CDS CDS | 6.0   | 1.5  | 18.2 | C | COG1894 COG1905         | NADH:ubiquinone oxidoreductase, NADH-binding (51 kD) subunit NADH:ubiquinone oxidoreductase 24 kD subunit                                                                                                                                                                                               |
| TS29Dor0921 CDS CDS  | 48.0  | 12.0 | 18.2 | C | COG1902                 | NADH:flavin oxidoreductases, Old Yellow Enzyme family                                                                                                                                                                                                                                                   |
| TS29Met0565 CDS CDS  | 4.0   | 1.0  | 18.2 | C | COG3260                 | Ni-Fe-hydrogenase III small subunit                                                                                                                                                                                                                                                                     |
| Acae0816 CDS CDS     | 16.0  | 4.0  | 18.2 | C | COG1014 COG1013 COG0674 | Pyruvate:ferredoxin oxidoreductase and related 2-oxoacid:ferredoxin oxidoreductases, gamma subunit Pyruvate:ferredoxin oxidoreductase and related 2-oxoacid:ferredoxin oxidoreductases, beta subunit Pyruvate:ferredoxin oxidoreductase and related 2-oxoacid:ferredoxin oxidoreductases, alpha subunit |
| DpigGOR10762 CDS CDS | 4.0   | 1.0  | 18.2 | C | COG1148 COG1908         | Heterodisulfide reductase, subunit A and related polyferredoxins Coenzyme F420-reducing hydrogenase, delta subunit                                                                                                                                                                                      |
| Buni1807 CDS CDS     | 8.0   | 2.0  | 18.2 | C | COG2869                 | Na <sup>+</sup> -transporting NADH:ubiquinone oxidoreductase, subunit NqrC                                                                                                                                                                                                                              |
| TS28Fae00076 CDS CDS | 4.0   | 1.0  | 18.2 | C | COG5016 COG1038         | Pyruvate/oxaloacetate carboxyltransferase Pyruvate carboxylase                                                                                                                                                                                                                                          |
| Chol0419 CDS CDS     | 4.0   | 1.0  | 18.2 | C | COG2221                 | Dissimilatory sulfite reductase (desulfovibrium), alpha and beta subunits                                                                                                                                                                                                                               |
| TS28Rum02230 CDS CDS | 5.3   | 1.3  | 18.2 | C | COG1454 COG1012         | Alcohol dehydrogenase, class IV NAD-dependent aldehyde dehydrogenases                                                                                                                                                                                                                                   |
| Bova2870 CDS CDS     | 1.3   | 0.3  | 18.2 | C | COG1979 COG1454         | Uncharacterized oxidoreductases, Fe-dependent alcohol dehydrogenase family Alcohol dehydrogenase, class IV                                                                                                                                                                                              |
| TS28Met1016 CDS CDS  | 2.0   | 0.5  | 17.7 | C | COG1927                 | Coenzyme F420-dependent N(5),N(10)-methyltetrahydromethanopterin dehydrogenase                                                                                                                                                                                                                          |
| Msmi751092 CDS CDS   | 2.0   | 0.5  | 17.7 | C | COG1927                 | Coenzyme F420-dependent N(5),N(10)-methyltetrahydromethanopterin dehydrogenase                                                                                                                                                                                                                          |
| Msmi740582 CDS CDS   | 2.0   | 0.5  | 17.7 | C | COG1927                 | Coenzyme F420-dependent N(5),N(10)-methyltetrahydromethanopterin dehydrogenase                                                                                                                                                                                                                          |
| TS28Met1194 CDS CDS  | 8.6   | 2.2  | 17.6 | C | COG1229                 | Formylmethanofuran dehydrogenase subunit A                                                                                                                                                                                                                                                              |
| BactD21416 CDS CDS   | 1.3   | 0.3  | 17.5 | C | COG1014 COG1013         | Pyruvate:ferredoxin oxidoreductase and related 2-oxoacid:ferredoxin oxidoreductases, gamma subunit Pyruvate:ferredoxin oxidoreductase and related 2-oxoacid:ferredoxin oxidoreductases, beta subunit                                                                                                    |
| Msmi751494 CDS CDS   | 11.5  | 3.0  | 17.4 | C | COG2141                 | Coenzyme F420-dependent N5,N10-methylene tetrahydromethanopterin reductase and related flavin-dependent oxidoreductases                                                                                                                                                                                 |
| Bova2002 CDS CDS     | 4.1   | 1.1  | 17.2 | C | COG1053                 | Succinate dehydrogenase/fumarate reductase, flavoprotein subunit                                                                                                                                                                                                                                        |
| TS28Fae08713 CDS CDS | 22.7  | 6.0  | 17.2 | C | COG2086                 | Electron transfer flavoprotein, beta subunit                                                                                                                                                                                                                                                            |
| TS28Clo09282 CDS CDS | 15.0  | 4.0  | 17.0 | C | COG3288 COG1282         | NAD/NADP transhydrogenase alpha subunit NAD/NADP transhydrogenase beta subunit                                                                                                                                                                                                                          |
| TS29Bac02967 CDS CDS | 6.9   | 1.9  | 16.8 | C | COG1866                 | Phosphoenolpyruvate carboxykinase (ATP)                                                                                                                                                                                                                                                                 |
| Msmi751300 CDS CDS   | 5.3   | 1.5  | 16.7 | C | COG3383 COG0243 COG1029 | Uncharacterized anaerobic dehydrogenase Anaerobic dehydrogenases, typically selenocysteine-containing Formylmethanofuran dehydrogenase subunit B                                                                                                                                                        |
| TS28Rum14310 CDS CDS | 5.5   | 1.5  | 16.6 | C | COG0371                 | Glycerol dehydrogenase and related enzymes                                                                                                                                                                                                                                                              |
| Bcap2399 CDS CDS     | 7.3   | 2.0  | 16.6 | C | COG1454 COG1012         | Alcohol dehydrogenase, class IV NAD-dependent aldehyde dehydrogenases                                                                                                                                                                                                                                   |
| FpraM2122074 CDS CDS | 7.3   | 2.0  | 16.6 | C | COG2086 COG2025         | Electron transfer flavoprotein, beta subunit Electron transfer flavoprotein, alpha subunit                                                                                                                                                                                                              |
| Buni3135 CDS CDS     | 21.9  | 6.0  | 16.6 | C | COG1866                 | Phosphoenolpyruvate carboxykinase (ATP)                                                                                                                                                                                                                                                                 |
| TS28Met1186 CDS CDS  | 6.4   | 1.8  | 16.3 | C | COG1908 COG1035 COG1145 | Coenzyme F420-reducing hydrogenase, delta subunit Coenzyme F420-reducing hydrogenase, beta subunit Ferredoxin                                                                                                                                                                                           |
| Buni1040 CDS CDS     | 8.9   | 2.5  | 16.2 | C | COG1014 COG0674         | Pyruvate:ferredoxin oxidoreductase and related 2-oxoacid:ferredoxin oxidoreductases, gamma subunit Pyruvate:ferredoxin oxidoreductase and related 2-oxoacid:ferredoxin oxidoreductases, alpha subunit                                                                                                   |
| TS29Rum13364 CDS CDS | 177.5 | 50.0 | 16.1 | C | COG2069                 | CO dehydrogenase/acetyl-CoA synthase delta subunit (corrinoid Fe-S protein)                                                                                                                                                                                                                             |
| Svar2525 CDS CDS     | 1.2   | 0.3  | 15.9 | C | COG0822                 | NiRu homolog involved in Fe-S cluster formation                                                                                                                                                                                                                                                         |

|                      |       |      |      |   |                                 |                                                                                                                                                                                                                                                                                                         |
|----------------------|-------|------|------|---|---------------------------------|---------------------------------------------------------------------------------------------------------------------------------------------------------------------------------------------------------------------------------------------------------------------------------------------------------|
| TS28Rum01872 CDS CDS | 3.5   | 1.0  | 15.9 | C | COG2080 COG3427                 | Aerobic-type carbon monoxide dehydrogenase, small subunit CoxS/CutS homologs Uncharacterized conserved protein                                                                                                                                                                                          |
| TS28Eub8528 CDS CDS  | 3.5   | 1.0  | 15.9 | C | COG1014 COG1013 COG0674         | Pyruvate:ferredoxin oxidoreductase and related 2-oxoacid:ferredoxin oxidoreductases, gamma subunit Pyruvate:ferredoxin oxidoreductase and related 2-oxoacid:ferredoxin oxidoreductases, beta subunit Pyruvate:ferredoxin oxidoreductase and related 2-oxoacid:ferredoxin oxidoreductases, alpha subunit |
| Chyl3388 CDS CDS     | 3.5   | 1.0  | 15.9 | C | COG1014 COG1013 COG0674         | Pyruvate:ferredoxin oxidoreductase and related 2-oxoacid:ferredoxin oxidoreductases, gamma subunit Pyruvate:ferredoxin oxidoreductase and related 2-oxoacid:ferredoxin oxidoreductases, beta subunit Pyruvate:ferredoxin oxidoreductase and related 2-oxoacid:ferredoxin oxidoreductases, alpha subunit |
| Msmi740794 CDS CDS   | 13.3  | 3.8  | 15.8 | C | COG0374 COG3259                 | Ni,Fe-hydrogenase 1 large subunit Coenzyme F420-reducing hydrogenase, alpha subunit                                                                                                                                                                                                                     |
| TS28Fae16152 CDS CDS | 17.3  | 5.0  | 15.7 | C | COG1454                         | Alcohol dehydrogenase, class IV                                                                                                                                                                                                                                                                         |
| TS28Met1782 CDS CDS  | 7.0   | 2.0  | 15.6 | C | COG1269                         | Archaeal/vacuolar-type H <sup>+</sup> -ATPase subunit I                                                                                                                                                                                                                                                 |
| Bbre0811 CDS CDS     | 3.4   | 1.0  | 15.4 | C | COG1882                         | Pyruvate-formate lyase                                                                                                                                                                                                                                                                                  |
| TS28Met0473 CDS CDS  | 14.0  | 4.2  | 15.3 | C | COG1148 COG1908                 | Heterodisulfide reductase, subunit A and related polyferredoxins Coenzyme F420-reducing hydrogenase, delta subunit                                                                                                                                                                                      |
| TS29Bac04864 CDS CDS | 13.4  | 4.0  | 15.3 | C | COG0711                         | F0F1-type ATP synthase, subunit b                                                                                                                                                                                                                                                                       |
| Rbro0916 CDS CDS     | 15.0  | 4.5  | 15.1 | C | COG1454                         | Alcohol dehydrogenase, class IV                                                                                                                                                                                                                                                                         |
| TS28Fae21291 CDS CDS | 5.0   | 1.5  | 15.1 | C | COG2033                         | Desulfoferredoxin                                                                                                                                                                                                                                                                                       |
| TS28Clo04623 CDS CDS | 5.0   | 1.5  | 15.1 | C | COG1454 COG1979                 | Alcohol dehydrogenase, class IV Uncharacterized oxidoreductases, Fe-dependent alcohol dehydrogenase family                                                                                                                                                                                              |
| Dfor2667 CDS CDS     | 10.0  | 3.0  | 15.1 | C | COG1592                         | Rubryerythrin                                                                                                                                                                                                                                                                                           |
| Aput0086 CDS CDS     | 10.0  | 3.0  | 15.1 | C | COG4656                         | Predicted NADH:ubiquinone oxidoreductase, subunit RnfC                                                                                                                                                                                                                                                  |
| TS28Rum11774 CDS CDS | 16.5  | 5.0  | 15.0 | C | COG0712                         | F0F1-type ATP synthase, delta subunit (mitochondrial oligomycin sensitivity protein)                                                                                                                                                                                                                    |
| Bxyl1943 CDS CDS     | 4.1   | 1.3  | 14.9 | C | COG1053                         | Succinate dehydrogenase/fumarate reductase, flavoprotein subunit                                                                                                                                                                                                                                        |
| TS29Bac07742 CDS CDS | 8.2   | 2.5  | 14.8 | C | COG1592                         | Rubryerythrin                                                                                                                                                                                                                                                                                           |
| TS28Clo0763 CDS CDS  | 6.5   | 2.0  | 14.8 | C | COG0822                         | NiFU homolog involved in Fe-S cluster formation                                                                                                                                                                                                                                                         |
| TS29Bac08258 CDS CDS | 26.0  | 8.0  | 14.8 | C | COG1592                         | Rubryerythrin                                                                                                                                                                                                                                                                                           |
| Rlae0637 CDS CDS     | 4.8   | 1.5  | 14.4 | C | COG1866                         | Phosphoenolpyruvate carboxykinase (ATP)                                                                                                                                                                                                                                                                 |
| TS28Fae08714 CDS CDS | 19.0  | 6.0  | 14.4 | C | COG2025 COG2086                 | Electron transfer flavoprotein, alpha subunit Electron transfer flavoprotein, beta subunit                                                                                                                                                                                                              |
| TS29Rum20003 CDS CDS | 23.6  | 7.5  | 14.3 | C | COG0822                         | NiFU homolog involved in Fe-S cluster formation                                                                                                                                                                                                                                                         |
| TS28Eub0367 CDS CDS  | 11.0  | 3.5  | 14.3 | C | COG0554                         | Glycerol kinase                                                                                                                                                                                                                                                                                         |
| TS28Rum09777 CDS CDS | 38.3  | 12.3 | 14.1 | C | COG1866                         | Phosphoenolpyruvate carboxykinase (ATP)                                                                                                                                                                                                                                                                 |
| TS28Fae01835 CDS CDS | 10.8  | 3.5  | 14.1 | C | COG1882                         | Pyruvate-formate lyase                                                                                                                                                                                                                                                                                  |
| TS28Dor0740 CDS CDS  | 8.7   | 2.8  | 13.9 | C | COG1592                         | Rubryerythrin                                                                                                                                                                                                                                                                                           |
| TS29Clo0432 CDS CDS  | 19.7  | 6.5  | 13.7 | C | COG1882                         | Pyruvate-formate lyase                                                                                                                                                                                                                                                                                  |
| Bova3669 CDS CDS     | 1.0   | 0.3  | 13.6 | C | COG1007                         | NADH:ubiquinone oxidoreductase subunit 2 (chain N)                                                                                                                                                                                                                                                      |
| Bxyl1379 CDS CDS     | 1.0   | 0.3  | 13.6 | C | COG1014 COG0674                 | Pyruvate:ferredoxin oxidoreductase and related 2-oxoacid:ferredoxin oxidoreductases, gamma subunit Pyruvate:ferredoxin oxidoreductase and related 2-oxoacid:ferredoxin oxidoreductases, alpha subunit                                                                                                   |
| TS28Met1148 CDS CDS  | 2.5   | 0.8  | 13.6 | C | COG1145                         | Ferredoxin                                                                                                                                                                                                                                                                                              |
| TS29Clo0895 CDS CDS  | 6.0   | 2.0  | 13.6 | C | COG0280 COG0857                 | Phosphotransacetylase BioD-like N-terminal domain of phosphotransacetylase                                                                                                                                                                                                                              |
| TS28Rum03174 CDS CDS | 1.5   | 0.5  | 13.6 | C | COG0356                         | F0F1-type ATP synthase, subunit a                                                                                                                                                                                                                                                                       |
| Rumhyd2637 CDS CDS   | 3.0   | 1.0  | 13.6 | C | COG0281 COG0280 COG0857         | Malic enzyme Phosphotransacetylase BioD-like N-terminal domain of phosphotransacetylase                                                                                                                                                                                                                 |
| Robe3511 CDS CDS     | 1.5   | 0.5  | 13.6 | C | COG0356                         | F0F1-type ATP synthase, subunit a                                                                                                                                                                                                                                                                       |
| Buni1806 CDS CDS     | 3.0   | 1.0  | 13.6 | C | COG4658 COG1805                 | Predicted NADH:ubiquinone oxidoreductase, subunit RnfD Na <sup>+</sup> -transporting NADH:ubiquinone oxidoreductase, subunit NqrB                                                                                                                                                                       |
| TS28Dor2656 CDS CDS  | 3.0   | 1.0  | 13.6 | C | COG1269                         | Archaeal/vacuolar-type H <sup>+</sup> -ATPase subunit I                                                                                                                                                                                                                                                 |
| TS28Met0556 CDS CDS  | 3.0   | 1.0  | 13.6 | C | COG1145                         | Ferredoxin                                                                                                                                                                                                                                                                                              |
| Rumhyd2688 CDS CDS   | 3.0   | 1.0  | 13.6 | C | COG1614                         | CO dehydrogenase/acetyl-CoA synthase beta subunit                                                                                                                                                                                                                                                       |
| Acae0251 CDS CDS     | 3.0   | 1.0  | 13.6 | C | COG2086                         | Electron transfer flavoprotein, beta subunit                                                                                                                                                                                                                                                            |
| Aput1545 CDS CDS     | 3.0   | 1.0  | 13.6 | C | COG1902                         | NADH:flavin oxidoreductases, Old Yellow Enzyme family                                                                                                                                                                                                                                                   |
| TS28Rum04771 CDS CDS | 1.5   | 0.5  | 13.6 | C | COG4656                         | Predicted NADH:ubiquinone oxidoreductase, subunit RnfC                                                                                                                                                                                                                                                  |
| Csvm1329 CDS CDS     | 3.0   | 1.0  | 13.6 | C | COG2086                         | Electron transfer flavoprotein, beta subunit                                                                                                                                                                                                                                                            |
| TS29Bac02279 CDS CDS | 4.5   | 1.5  | 13.6 | C | COG1592                         | Rubryerythrin                                                                                                                                                                                                                                                                                           |
| Dlon0162 CDS CDS     | 4.5   | 1.5  | 13.6 | C | COG4656                         | Predicted NADH:ubiquinone oxidoreductase, subunit RnfC                                                                                                                                                                                                                                                  |
| TS28Met1190 CDS CDS  | 4.8   | 1.6  | 13.5 | C | COG1145                         | Ferredoxin                                                                                                                                                                                                                                                                                              |
| TS28Rum1190 CDS CDS  | 16.3  | 5.5  | 13.4 | C | COG0282                         | Acetate kinase                                                                                                                                                                                                                                                                                          |
| Msmi751009 CDS CDS   | 2.9   | 1.0  | 13.2 | C | COG1941                         | Coenzyme F420-reducing hydrogenase, gamma subunit                                                                                                                                                                                                                                                       |
| Bova3395 CDS CDS     | 12.8  | 4.5  | 12.9 | C | COG1014 COG1013 COG0674         | Pyruvate:ferredoxin oxidoreductase and related 2-oxoacid:ferredoxin oxidoreductases, gamma subunit Pyruvate:ferredoxin oxidoreductase and related 2-oxoacid:ferredoxin oxidoreductases, beta subunit Pyruvate:ferredoxin oxidoreductase and related 2-oxoacid:ferredoxin oxidoreductases, alpha subunit |
| TS28Rum11776 CDS CDS | 8.5   | 3.0  | 12.9 | C | COG0056                         | F0F1-type ATP synthase, alpha subunit                                                                                                                                                                                                                                                                   |
| Buni2097 CDS CDS     | 8.5   | 3.0  | 12.9 | C | COG0224                         | F0F1-type ATP synthase, gamma subunit                                                                                                                                                                                                                                                                   |
| Rumhyd1672 CDS CDS   | 2.8   | 1.0  | 12.9 | C | COG0055                         | F0F1-type ATP synthase, beta subunit                                                                                                                                                                                                                                                                    |
| Bhan2076 CDS CDS     | 2.8   | 1.0  | 12.9 | C | COG1614                         | CO dehydrogenase/acetyl-CoA synthase beta subunit                                                                                                                                                                                                                                                       |
| TS29Met0823 CDS CDS  | 31.1  | 11.0 | 12.8 | C | COG1941                         | Coenzyme F420-reducing hydrogenase, gamma subunit                                                                                                                                                                                                                                                       |
| TS29Rum14199 CDS CDS | 39.5  | 14.0 | 12.8 | C | COG1592                         | Rubryerythrin                                                                                                                                                                                                                                                                                           |
| TS29Rum11000 CDS CDS | 31.0  | 11.0 | 12.8 | C | COG2025 COG2086                 | Electron transfer flavoprotein, alpha subunit Electron transfer flavoprotein, beta subunit                                                                                                                                                                                                              |
| TS29Rum13363 CDS CDS | 222.2 | 79.0 | 12.8 | C | COG1456                         | CO dehydrogenase/acetyl-CoA synthase gamma subunit (corrinoid Fe-S protein)                                                                                                                                                                                                                             |
| BactD11824 CDS CDS   | 8.4   | 3.0  | 12.7 | C | COG0224                         | F0F1-type ATP synthase, gamma subunit                                                                                                                                                                                                                                                                   |
| Msmi740375 CDS CDS   | 1.4   | 0.5  | 12.7 | C | COG2218                         | Formylmethanofuran dehydrogenase subunit C                                                                                                                                                                                                                                                              |
| Dlon2091 CDS CDS     | 4.2   | 1.5  | 12.7 | C | COG1592                         | Rubryerythrin                                                                                                                                                                                                                                                                                           |
| BactD12161 CDS CDS   | 1.9   | 0.7  | 12.6 | C | COG1979 COG1454                 | Uncharacterized oxidoreductases, Fe-dependent alcohol dehydrogenase family Alcohol dehydrogenase, class IV                                                                                                                                                                                              |
| Bxyl0241 CDS CDS     | 12.4  | 4.5  | 12.6 | C | COG0711                         | F0F1-type ATP synthase, subunit b                                                                                                                                                                                                                                                                       |
| Cbo13054 CDS CDS     | 11.0  | 4.0  | 12.5 | C | COG1529 COG2080                 | Aerobic-type carbon monoxide dehydrogenase, large subunit CoxL/CutL homologs Aerobic-type carbon monoxide dehydrogenase, small subunit CoxS/CutS homologs                                                                                                                                               |
| TS29Met0285 CDS CDS  | 24.4  | 9.0  | 12.3 | C | COG2048 COG0247 COG1150         | Heterodisulfide reductase, subunit B Fe-S oxidoreductase Heterodisulfide reductase, subunit C                                                                                                                                                                                                           |
| Bxyl0844 CDS CDS     | 8.1   | 3.0  | 12.2 | C | COG1145                         | Ferredoxin                                                                                                                                                                                                                                                                                              |
| TS28Met1301 CDS CDS  | 7.0   | 2.6  | 12.2 | C | COG2048 COG0479 COG0247 COG1139 | Heterodisulfide reductase, subunit B Succinate dehydrogenase/fumarate reductase, Fe-S protein subunit Fe-S oxidoreductase Uncharacterized conserved protein containing a ferredoxin-like domain                                                                                                         |

|                           |       |       |      |   |                                 |                                                                                                                                                                                                                                                                                                                                             |
|---------------------------|-------|-------|------|---|---------------------------------|---------------------------------------------------------------------------------------------------------------------------------------------------------------------------------------------------------------------------------------------------------------------------------------------------------------------------------------------|
| BactD10967 CDS CDS        | 4.3   | 1.6   | 12.2 | C | COG5016 COG1038                 | Pyruvate/oxaloacetate carboxyltransferase Pyruvate carboxylase                                                                                                                                                                                                                                                                              |
| TS29Rum13367 CDS CDS      | 124.6 | 46.5  | 12.2 | C | COG1151                         | 6Fe-6S prismatic cluster-containing protein                                                                                                                                                                                                                                                                                                 |
| TS29Bac00274 CDS CDS      | 25.3  | 9.5   | 12.1 | C | COG5016 COG1038                 | Pyruvate/oxaloacetate carboxyltransferase Pyruvate carboxylase                                                                                                                                                                                                                                                                              |
| TS28Fae10823 CDS CDS      | 2.7   | 1.0   | 12.1 | C | COG1454                         | Alcohol dehydrogenase, class IV                                                                                                                                                                                                                                                                                                             |
| Bum0871 CDS CDS           | 4.0   | 1.5   | 12.1 | C | COG1145                         | Ferredoxin                                                                                                                                                                                                                                                                                                                                  |
| TS28Rum16063 CDS CDS      | 8.0   | 3.0   | 12.1 | C | COG3383 COG0243                 | Uncharacterized anaerobic dehydrogenase Anaerobic dehydrogenases, typically selenocysteine-containing                                                                                                                                                                                                                                       |
| TS29Clo4498 CDS CDS       | 8.0   | 3.0   | 12.1 | C | COG1620                         | L-lactate permease                                                                                                                                                                                                                                                                                                                          |
| TS29Met0924 CDS CDS       | 21.2  | 8.0   | 12.0 | C | COG1148 COG1908                 | Heterodisulfide reductase, subunit A and related polyferredoxins Coenzyme F420-reducing hydrogenase, delta subunit                                                                                                                                                                                                                          |
| TS29Bac10921 CDS CDS      | 13.1  | 5.0   | 11.9 | C | COG1866                         | Phosphoenolpyruvate carboxylkinase (ATP)                                                                                                                                                                                                                                                                                                    |
| TS29Rum13368 CDS CDS      | 69.6  | 26.5  | 11.9 | C | COG1151                         | 6Fe-6S prismatic cluster-containing protein                                                                                                                                                                                                                                                                                                 |
| Msmi740099 CDS CDS        | 1.8   | 0.7   | 11.9 | C | COG1436                         | Archaeal/vacuolar-type H <sup>+</sup> -ATPase subunit F                                                                                                                                                                                                                                                                                     |
| Msmi751596 CDS CDS        | 1.8   | 0.7   | 11.9 | C | COG1436                         | Archaeal/vacuolar-type H <sup>+</sup> -ATPase subunit F                                                                                                                                                                                                                                                                                     |
| BDI3032 CDS rubrerythrin  | 9.0   | 3.5   | 11.7 | C | COG1592                         | Rubrerythrin                                                                                                                                                                                                                                                                                                                                |
| TS28Rum15923 CDS CDS      | 36.0  | 14.0  | 11.7 | C | COG4624 COG1034 COG3383 COG0243 | Iron only hydrogenase large subunit, C-terminal domain NADH dehydrogenase/NADH:ubiquinone oxidoreductase 75 kD subunit (chain G) Uncharacterized anaerobic dehydrogenase Anaerobic dehydrogenases, typically selenocysteine-containing                                                                                                      |
| Bxvl1962 CDS CDS          | 3.4   | 1.3   | 11.6 | C | COG5016 COG1038                 | Pyruvate/oxaloacetate carboxyltransferase Pyruvate carboxylase                                                                                                                                                                                                                                                                              |
| Msmi1348 CDS rubrerythrin | 2.6   | 1.0   | 11.6 | C | COG1592                         | Rubrerythrin                                                                                                                                                                                                                                                                                                                                |
| TS28Met0463 CDS CDS       | 2.6   | 1.0   | 11.6 | C | COG1592                         | Rubrerythrin                                                                                                                                                                                                                                                                                                                                |
| TS29Clo1666 CDS CDS       | 144.0 | 56.5  | 11.6 | C | COG1882                         | Pyruvate-formate lyase                                                                                                                                                                                                                                                                                                                      |
| BactD13022 CDS CDS        | 10.2  | 4.0   | 11.6 | C | COG0822                         | NiFU homolog involved in Fe-S cluster formation                                                                                                                                                                                                                                                                                             |
| Acae0053 CDS CDS          | 5.0   | 2.0   | 11.3 | C | COG3808                         | Inorganic pyrophosphatase                                                                                                                                                                                                                                                                                                                   |
| Rena1692 CDS CDS          | 10.0  | 4.0   | 11.3 | C | COG0224                         | F0F1-type ATP synthase, gamma subunit                                                                                                                                                                                                                                                                                                       |
| Rumhyd2795 CDS CDS        | 5.0   | 2.0   | 11.3 | C | COG0508 COG1071 COG0022         | Pyruvate/2-oxoglutarate dehydrogenase complex, dihydroliipoamide acyltransferase (E2) component, and related enzymes Pyruvate/2-oxoglutarate dehydrogenase complex, dehydrogenase (E1) component, eukaryotic type, alpha subunit Pyruvate/2-oxoglutarate dehydrogenase complex, dehydrogenase (E1) component, eukaryotic type, beta subunit |
| TS28Fae09992 CDS CDS      | 2.5   | 1.0   | 11.3 | C | COG0280 COG0857                 | Phosphotransacetylase BioD-like N-terminal domain of phosphotransacetylase                                                                                                                                                                                                                                                                  |
| TS28Rum01176 CDS CDS      | 2.5   | 1.0   | 11.3 | C | COG2878 COG1145                 | Predicted NADH:ubiquinone oxidoreductase, subunit RnfB Ferredoxin                                                                                                                                                                                                                                                                           |
| TS29Dor0452 CDS CDS       | 5.0   | 2.0   | 11.3 | C | COG1014 COG4231 COG1146         | Pyruvate:ferredoxin oxidoreductase and related 2-oxoacid:ferredoxin oxidoreductases, gamma subunit Indolepyruvate ferredoxin oxidoreductase, alpha and beta subunits Ferredoxin                                                                                                                                                             |
| TS28Rum15926 CDS CDS      | 7.5   | 3.0   | 11.3 | C | COG1905                         | NADH:ubiquinone oxidoreductase 24 kD subunit                                                                                                                                                                                                                                                                                                |
| Msmi740095 CDS CDS        | 6.3   | 2.5   | 11.3 | C | COG1269                         | Archaeal/vacuolar-type H <sup>+</sup> -ATPase subunit I                                                                                                                                                                                                                                                                                     |
| TS29Par274 CDS CDS        | 7.3   | 3.0   | 11.1 | C | COG1592                         | Rubrerythrin                                                                                                                                                                                                                                                                                                                                |
| TS28Rum09669 CDS CDS      | 74.1  | 30.5  | 11.0 | C | COG0822                         | NiFU homolog involved in Fe-S cluster formation                                                                                                                                                                                                                                                                                             |
| Msmi740379 CDS CDS        | 0.6   | 0.3   | 10.9 | C | COG1145                         | Ferredoxin                                                                                                                                                                                                                                                                                                                                  |
| TS29Met0497 CDS CDS       | 0.6   | 0.3   | 10.9 | C | COG1145                         | Ferredoxin                                                                                                                                                                                                                                                                                                                                  |
| Msmi751298 CDS CDS        | 0.6   | 0.3   | 10.9 | C | COG1145                         | Ferredoxin                                                                                                                                                                                                                                                                                                                                  |
| TS28Met1191 CDS CDS       | 0.6   | 0.3   | 10.9 | C | COG1145                         | Ferredoxin                                                                                                                                                                                                                                                                                                                                  |
| Msmi740384 CDS CDS        | 6.7   | 2.8   | 10.8 | C | COG1035 COG1145 COG1908         | Coenzyme F420-reducing hydrogenase, beta subunit Ferredoxin Coenzyme F420-reducing hydrogenase, delta subunit                                                                                                                                                                                                                               |
| Bhan1765 CDS CDS          | 7.2   | 3.0   | 10.8 | C | COG1866                         | Phosphoenolpyruvate carboxylkinase (ATP)                                                                                                                                                                                                                                                                                                    |
| TS28Rum15656 CDS CDS      | 10.8  | 4.5   | 10.8 | C | COG2080 COG1529                 | Aerobic-type carbon monoxide dehydrogenase, small subunit CoxS/CutS homologs Aerobic-type carbon monoxide dehydrogenase, large subunit CoxL/CutL homologs                                                                                                                                                                                   |
| Robe2012 CDS CDS          | 17.8  | 7.5   | 10.8 | C | COG1151                         | 6Fe-6S prismatic cluster-containing protein                                                                                                                                                                                                                                                                                                 |
| TS29Rum21138 CDS CDS      | 99.2  | 42.0  | 10.7 | C | COG1592                         | Rubrerythrin                                                                                                                                                                                                                                                                                                                                |
| TS29Met0431 CDS CDS       | 11.8  | 5.0   | 10.7 | C | COG3259                         | Coenzyme F420-reducing hydrogenase, alpha subunit                                                                                                                                                                                                                                                                                           |
| Msmi750888 CDS CDS        | 2.8   | 1.2   | 10.7 | C | COG1145                         | Ferredoxin                                                                                                                                                                                                                                                                                                                                  |
| TS28Fae16104 CDS CDS      | 8.6   | 3.7   | 10.6 | C | COG4656                         | Predicted NADH:ubiquinone oxidoreductase, subunit RnfC                                                                                                                                                                                                                                                                                      |
| Acae1342 CDS CDS          | 2.3   | 1.0   | 10.6 | C | COG0822                         | NiFU homolog involved in Fe-S cluster formation                                                                                                                                                                                                                                                                                             |
| Bxyl1361 CDS CDS          | 3.5   | 1.5   | 10.6 | C | COG1249                         | Pyruvate/2-oxoglutarate dehydrogenase complex, dihydroliipoamide dehydrogenase (E3) component, and related enzymes                                                                                                                                                                                                                          |
| TS28Rum08609 CDS CDS      | 3.5   | 1.5   | 10.6 | C | COG5016 COG1038                 | Pyruvate/oxaloacetate carboxyltransferase Pyruvate carboxylase                                                                                                                                                                                                                                                                              |
| Cbol1485 CDS CDS          | 7.0   | 3.0   | 10.6 | C | COG2710                         | Nitrogenase molybdenum-iron protein, alpha and beta chains                                                                                                                                                                                                                                                                                  |
| TS28Fae20696 CDS CDS      | 2.3   | 1.0   | 10.6 | C | COG0584 COG4781                 | Glycerophosphoryl diester phosphodiesterase Membrane domain of membrane-anchored glycerophosphoryl diester phosphodiesterase                                                                                                                                                                                                                |
| TS29Bac03237 CDS CDS      | 11.5  | 5.0   | 10.4 | C | COG1394                         | Archaeal/vacuolar-type H <sup>+</sup> -ATPase subunit D                                                                                                                                                                                                                                                                                     |
| TS28Met1779 CDS CDS       | 3.1   | 1.4   | 10.4 | C | COG1527 COG1436                 | Archaeal/vacuolar-type H <sup>+</sup> -ATPase subunit C Archaeal/vacuolar-type H <sup>+</sup> -ATPase subunit F                                                                                                                                                                                                                             |
| Bfra31121738 CDS CDS      | 2.3   | 1.0   | 10.2 | C | COG2086                         | Electron transfer flavoprotein, beta subunit                                                                                                                                                                                                                                                                                                |
| Rumhyd1367 CDS CDS        | 4.5   | 2.0   | 10.2 | C | COG1014 COG1013 COG0674         | Pyruvate:ferredoxin oxidoreductase and related 2-oxoacid:ferredoxin oxidoreductases, gamma subunit Pyruvate:ferredoxin oxidoreductase and related 2-oxoacid:ferredoxin oxidoreductases, beta subunit Pyruvate:ferredoxin oxidoreductase and related 2-oxoacid:ferredoxin oxidoreductases, alpha subunit                                     |
| TS29Rum05362 CDS CDS      | 4.5   | 2.0   | 10.2 | C | COG1902                         | NADH:flavin oxidoreductases, Old Yellow Enzyme family                                                                                                                                                                                                                                                                                       |
| FpraM2120923 CDS CDS      | 3.3   | 1.5   | 10.1 | C | COG1454                         | Alcohol dehydrogenase, class IV                                                                                                                                                                                                                                                                                                             |
| FpraM2121279 CDS CDS      | 208.8 | 94.0  | 10.1 | C | COG1014 COG1013 COG0674         | Pyruvate:ferredoxin oxidoreductase and related 2-oxoacid:ferredoxin oxidoreductases, gamma subunit Pyruvate:ferredoxin oxidoreductase and related 2-oxoacid:ferredoxin oxidoreductases, beta subunit Pyruvate:ferredoxin oxidoreductase and related 2-oxoacid:ferredoxin oxidoreductases, alpha subunit                                     |
| Msmi750891 CDS CDS        | 4.4   | 2.0   | 10.0 | C | COG1908 COG1941                 | Coenzyme F420-reducing hydrogenase, delta subunit Coenzyme F420-reducing hydrogenase, gamma subunit                                                                                                                                                                                                                                         |
| TS28Met0354 CDS CDS       | 4.4   | 2.0   | 10.0 | C | COG1908 COG1941                 | Coenzyme F420-reducing hydrogenase, delta subunit Coenzyme F420-reducing hydrogenase, gamma subunit                                                                                                                                                                                                                                         |
| TS28Bif4766 CDS CDS       | 1.3   | 57.5  | 0.1  | C | COG1249                         | Pyruvate/2-oxoglutarate dehydrogenase complex, dihydroliipoamide dehydrogenase (E3) component, and related enzymes                                                                                                                                                                                                                          |
| TS28Bif0847 CDS CDS       | 2.8   | 130.5 | 0.1  | C | COG1454 COG1012                 | Alcohol dehydrogenase, class IV NAD-dependent aldehyde dehydrogenases                                                                                                                                                                                                                                                                       |
| TS29Bif3771 CDS CDS       | 2.8   | 130.5 | 0.1  | C | COG1454 COG1012                 | Alcohol dehydrogenase, class IV NAD-dependent aldehyde dehydrogenases                                                                                                                                                                                                                                                                       |
| TS29Col0474 CDS CDS       | 1.0   | 48.0  | 0.1  | C | COG0554                         | Glycerol kinase                                                                                                                                                                                                                                                                                                                             |
| TS29Bif2730 CDS CDS       | 0.5   | 24.8  | 0.1  | C | COG0039                         | Malate/lactate dehydrogenases                                                                                                                                                                                                                                                                                                               |
| Bpse1451 CDS CDS          | 0.3   | 16.8  | 0.1  | C | COG1804                         | Predicted acyl-CoA transferases/carnitine dehydratase                                                                                                                                                                                                                                                                                       |
| TS29Bif1456 CDS CDS       | 0.7   | 33.8  | 0.1  | C | COG1454                         | Alcohol dehydrogenase, class IV                                                                                                                                                                                                                                                                                                             |
| TS29Rum13605 CDS CDS      | 1.0   | 51.0  | 0.1  | C | COG1151                         | 6Fe-6S prismatic cluster-containing protein                                                                                                                                                                                                                                                                                                 |
| TS29Bif2221 CDS CDS       | 1.5   | 77.0  | 0.1  | C | COG1048                         | Aconitase A                                                                                                                                                                                                                                                                                                                                 |
| TS29Rum00849 CDS CDS      | 1.0   | 55.0  | 0.1  | C | COG1409 COG0584                 | Predicted phosphohydrolases Glycerophosphoryl diester phosphodiesterase                                                                                                                                                                                                                                                                     |
| TS28Fae12108 CDS CDS      | 0.5   | 28.5  | 0.1  | C | COG4658 COG1805                 | Predicted NADH:ubiquinone oxidoreductase, subunit RnfD Na <sup>+</sup> -transporting NADH:ubiquinone oxidoreductase, subunit NqrB                                                                                                                                                                                                           |

|                             |      |       |      |     |                                                                 |                                                                                                                                                                                                                                           |
|-----------------------------|------|-------|------|-----|-----------------------------------------------------------------|-------------------------------------------------------------------------------------------------------------------------------------------------------------------------------------------------------------------------------------------|
| TS29Col0483 CDS CDS         | 1.0  | 57.5  | 0.1  | C   | COG0055                                                         | F0F1-type ATP synthase, beta subunit                                                                                                                                                                                                      |
| TS28Bif4574 CDS CDS         | 0.5  | 29.8  | 0.1  | C   | COG0039                                                         | Malate/lactate dehydrogenases                                                                                                                                                                                                             |
| TS29Bif0986 CDS CDS         | 0.7  | 39.8  | 0.1  | C   | COG0039                                                         | Malate/lactate dehydrogenases                                                                                                                                                                                                             |
| TS29Col0805 CDS CDS         | 0.5  | 30.0  | 0.1  | C   | COG0656 COG0667 COG1453                                         | Aldo/keto reductases, related to diketoglutarate reductase Predicted oxidoreductases (related to aryl-alcohol dehydrogenases) Predicted oxidoreductases of the aldo/keto reductase family                                                 |
| TS28Bif5371 CDS CDS         | 0.5  | 27.3  | 0.1  | C   | COG0282                                                         | Acetate kinase                                                                                                                                                                                                                            |
| TS29RumUnc0107 CDS CDS      | 1.0  | 64.0  | 0.1  | C   | COG0056                                                         | F0F1-type ATP synthase, alpha subunit                                                                                                                                                                                                     |
| TS29Bif0211 CDS CDS         | 0.3  | 21.3  | 0.1  | C   | COG1804                                                         | Predicted acyl-CoA transferases/carnitine dehydratase                                                                                                                                                                                     |
| TS29Rum13342 CDS CDS        | 0.3  | 22.0  | 0.1  | C   | COG0716                                                         | Flavodoxins                                                                                                                                                                                                                               |
| TS28Fae17794 CDS CDS        | 0.4  | 27.0  | 0.1  | C   | COG0056 COG4933                                                 | F0F1-type ATP synthase, alpha subunit Uncharacterized conserved protein                                                                                                                                                                   |
| TS29Bif0507 CDS CDS         | 3.8  | 258.7 | 0.1  | C   | COG2352                                                         | Phosphoenolpyruvate carboxylase                                                                                                                                                                                                           |
| Bnse1442 CDS CDS            | 0.1  | 9.8   | 0.1  | C   | COG0055                                                         | F0F1-type ATP synthase, beta subunit                                                                                                                                                                                                      |
| TS28Bif3354 CDS CDS         | 0.5  | 35.3  | 0.1  | C   | COG1048                                                         | Aconitase A                                                                                                                                                                                                                               |
| TS29Rum00947 CDS CDS        | 0.5  | 37.5  | 0.1  | C   | COG1882                                                         | Pyruvate-formate lyase                                                                                                                                                                                                                    |
| TS29Bif3900 CDS CDS         | 1.5  | 113.2 | 0.1  | C   | COG1454 COG1979                                                 | Alcohol dehydrogenase, class IV Uncharacterized oxidoreductases, Fe-dependent alcohol dehydrogenase family                                                                                                                                |
| TS28Fae07401 CDS CDS        | 0.5  | 38.5  | 0.1  | C   | COG0426 COG0446 COG1773 COG1853                                 | Uncharacterized flavoproteins Uncharacterized NAD(FAD)-dependent dehydrogenases Rubredoxin Conserved protein/domain typically associated with flavoprotein oxygenases, DIM6/NTAB family                                                   |
| TS29Rum20557 CDS CDS        | 0.5  | 39.5  | 0.1  | C   | COG1454 COG1979                                                 | Alcohol dehydrogenase, class IV Uncharacterized oxidoreductases, Fe-dependent alcohol dehydrogenase family                                                                                                                                |
| TS28Bif0786 CDS CDS         | 0.8  | 67.2  | 0.1  | C   | COG1249                                                         | Pyruvate/2-oxoglutarate dehydrogenase complex, dihydroliipoamide dehydrogenase (E3) component, and related enzymes                                                                                                                        |
| TS29Bif3820 CDS CDS         | 0.8  | 67.2  | 0.1  | C   | COG1249                                                         | Pyruvate/2-oxoglutarate dehydrogenase complex, dihydroliipoamide dehydrogenase (E3) component, and related enzymes                                                                                                                        |
| TS29Bif1598 CDS CDS         | 0.3  | 29.0  | 0.1  | C   | COG1454                                                         | Alcohol dehydrogenase, class IV                                                                                                                                                                                                           |
| TS29Bif2955 CDS CDS         | 0.3  | 21.8  | 0.1  | C   | COG0822                                                         | NiRu homolog involved in Fe-S cluster formation                                                                                                                                                                                           |
| TS29Bif0237 CDS CDS         | 0.3  | 21.8  | 0.1  | C   | COG0822                                                         | NiRu homolog involved in Fe-S cluster formation                                                                                                                                                                                           |
| TS29Rum14576 CDS CDS        | 0.5  | 44.0  | 0.1  | C   | COG1148 COG1908                                                 | Heterodisulfide reductase, subunit A and related polyferredoxins Coenzyme F420-reducing hydrogenase, delta subunit                                                                                                                        |
| TS29Rum15722 CDS CDS        | 0.5  | 44.5  | 0.1  | C   | COG1012                                                         | NAD-dependent aldehyde dehydrogenases                                                                                                                                                                                                     |
| TS29Bif2805 CDS CDS         | 0.3  | 29.7  | 0.1  | C   | COG0045                                                         | Succinyl-CoA synthetase, beta subunit                                                                                                                                                                                                     |
| TS28Bif1906 CDS CDS         | 0.3  | 29.7  | 0.1  | C   | COG0045                                                         | Succinyl-CoA synthetase, beta subunit                                                                                                                                                                                                     |
| TS28Bif3811 CDS CDS         | 0.2  | 17.8  | 0.1  | C   | COG0240                                                         | Glycerol-3-phosphate dehydrogenase                                                                                                                                                                                                        |
| TS28Fae14489 CDS CDS        | 0.3  | 24.0  | 0.0  | C   | COG4658                                                         | Predicted NADH:ubiquinone oxidoreductase, subunit RnfD                                                                                                                                                                                    |
| TS28Bif1622 CDS CDS         | 0.1  | 14.3  | 0.0  | C   | COG0055                                                         | F0F1-type ATP synthase, beta subunit                                                                                                                                                                                                      |
| TS29Col3364 CDS CDS         | 0.3  | 39.0  | 0.0  | C   | COG1894 COG1905                                                 | NADH:ubiquinone oxidoreductase, NADH-binding (51 kD) subunit NADH:ubiquinone oxidoreductase 24 kD subunit                                                                                                                                 |
| TS29Bif3391 CDS CDS         | 0.8  | 99.1  | 0.0  | C   | COG1757                                                         | Na+/H+ antiporter                                                                                                                                                                                                                         |
| TS29Bif3354 CDS CDS         | 0.3  | 34.5  | 0.0  | C   | COG1249                                                         | Pyruvate/2-oxoglutarate dehydrogenase complex, dihydroliipoamide dehydrogenase (E3) component, and related enzymes                                                                                                                        |
| TS29Bif1208 CDS CDS         | 0.2  | 27.8  | 0.0  | C   | COG0240                                                         | Glycerol-3-phosphate dehydrogenase                                                                                                                                                                                                        |
| TS29Bif0245 CDS CDS         | 0.1  | 21.8  | 0.0  | C   | COG0055                                                         | F0F1-type ATP synthase, beta subunit                                                                                                                                                                                                      |
| TS29Bif3083 CDS CDS         | 0.5  | 69.0  | 0.0  | C   | COG0282                                                         | Acetate kinase                                                                                                                                                                                                                            |
| TS29Bif3039 CDS CDS         | 0.5  | 79.8  | 0.0  | C   | COG1053                                                         | Succinate dehydrogenase/fumarate reductase, flavoprotein subunit                                                                                                                                                                          |
| TS29Bif2942 CDS CDS         | 0.3  | 43.3  | 0.0  | C   | COG1282                                                         | NAD/NADP transhydrogenase beta subunit                                                                                                                                                                                                    |
| TS29Bif3407 CDS CDS         | 0.2  | 117.5 | 0.0  | C   | COG1012                                                         | NAD-dependent aldehyde dehydrogenases                                                                                                                                                                                                     |
| TS29Bif3301 CDS CDS         | 0.3  | 55.8  | 0.0  | C   | COG0656 COG0667                                                 | Aldo/keto reductases, related to diketoglutarate reductase Predicted oxidoreductases (related to aryl-alcohol dehydrogenases)                                                                                                             |
| TS29Bif3082 CDS CDS         | 0.5  | 143.8 | 0.0  | C   | COG0280 COG0857                                                 | Phosphotransacetylase BioD-like N-terminal domain of phosphotransacetylase                                                                                                                                                                |
| TS28Bif4538 CDS CDS         | 0.3  | 72.7  | 0.0  | C   | COG0778                                                         | Nitroreductase                                                                                                                                                                                                                            |
| TS29Bif3534 CDS CDS         | 0.3  | 72.7  | 0.0  | C   | COG0778                                                         | Nitroreductase                                                                                                                                                                                                                            |
| TS28Fae16539 CDS CDS        | 0.1  | 67.0  | 0.0  | C   | COG1882                                                         | Pyruvate-formate lyase                                                                                                                                                                                                                    |
| Robe0280 CDS CDS            | 2.0  | 0.5   | 18.2 | C F | COG1319 COG4630                                                 | Aerobic-type carbon monoxide dehydrogenase, middle subunit CoxM/CutM homologs Xanthine dehydrogenase, iron-sulfur cluster and FAD-binding subunit A                                                                                       |
| Cbo13053 CDS CDS            | 3.0  | 1.0   | 13.6 | C F | COG1319 COG2080 COG4630                                         | Aerobic-type carbon monoxide dehydrogenase, middle subunit CoxM/CutM homologs Aerobic-type carbon monoxide dehydrogenase, small subunit CoxS/CutS homologs Xanthine dehydrogenase, iron-sulfur cluster and FAD-binding subunit A          |
| FpraM2121978 CDS CDS        | 8.0  | 3.5   | 10.4 | C F | COG1529 COG2080 COG4631                                         | Aerobic-type carbon monoxide dehydrogenase, large subunit CoxL/CutL homologs Aerobic-type carbon monoxide dehydrogenase, small subunit CoxS/CutS homologs Xanthine dehydrogenase, molybdopterin-binding subunit B                         |
| BactD20750 CDS CDS          | 1.2  | 0.5   | 10.9 | C G | COG1070 COG1069                                                 | Sugar (pentulose and hexulose) kinases Ribulose kinase                                                                                                                                                                                    |
| Bova1898 CDS CDS            | 1.2  | 0.5   | 10.9 | C G | COG1070 COG1069                                                 | Sugar (pentulose and hexulose) kinases Ribulose kinase                                                                                                                                                                                    |
| TS28Rum11278 CDS CDS        | 1.7  | 0.3   | 22.7 | C H | COG0543                                                         | 2-polyvinylphenol hydroxylase and related flavodoxin oxidoreductases                                                                                                                                                                      |
| TS29Rum07782 CDS CDS        | 1.7  | 0.3   | 22.7 | C H | COG0543                                                         | 2-polyvinylphenol hydroxylase and related flavodoxin oxidoreductases                                                                                                                                                                      |
| TS28Rum04107 CDS CDS        | 1.7  | 0.5   | 15.1 | C H | COG2243 COG2073 COG2241 COG2082 COG1010 COG1251 COG1492 COG2158 | Precorrin-2 methylase Cobalamin biosynthesis protein CbiG Precorrin-6B methylase 1 Precorrin isomerase Precorrin-3B methylase NAD(P)H-nitrite reductase Cobryric acid synthase Uncharacterized protein containing a Zn-finger-like domain |
| TS29Rum13395 CDS CDS        | 94.0 | 41.0  | 10.4 | C H | COG0543                                                         | 2-polyvinylphenol hydroxylase and related flavodoxin oxidoreductases                                                                                                                                                                      |
| TS28Bac1795 CDS CDS         | 4.3  | 0.7   | 29.5 | C I | COG2030 COG0280 COG0857                                         | Acyl dehydratase Phosphotransacetylase BioD-like N-terminal domain of phosphotransacetylase                                                                                                                                               |
| TS28Fae18582 CDS CDS        | 13.0 | 2.0   | 29.5 | C I | COG1960 COG2025                                                 | Acyl-CoA dehydrogenases Electron transfer flavoprotein, alpha subunit                                                                                                                                                                     |
| TS29Rum10998 CDS CDS        | 13.0 | 2.0   | 29.5 | C I | COG1960 COG2025                                                 | Acyl-CoA dehydrogenases Electron transfer flavoprotein, alpha subunit                                                                                                                                                                     |
| M23Apg4243 CDS Rubrerythrin | 6.0  | 1.0   | 27.2 | C I | COG1592 COG1607                                                 | Rubrerythrin Acyl-CoA hydrolase                                                                                                                                                                                                           |
| Rumhyd1369 CDS CDS          | 6.0  | 1.0   | 27.2 | C I | COG1038 COG0439 COG4770                                         | Pyruvate carboxylase Biotin carboxylase Acetyl/propionyl-CoA carboxylase, alpha subunit                                                                                                                                                   |
| Bxyl12120 CDS CDS           | 4.8  | 1.0   | 21.7 | C I | COG1592 COG1607                                                 | Rubrerythrin Acyl-CoA hydrolase                                                                                                                                                                                                           |
| TS29Rum10997 CDS CDS        | 19.5 | 5.0   | 17.7 | C I | COG1960 COG2025                                                 | Acyl-CoA dehydrogenases Electron transfer flavoprotein, alpha subunit                                                                                                                                                                     |
| TS28Col1695 CDS CDS         | 15.5 | 4.0   | 17.6 | C I | COG1960 COG2025                                                 | Acyl-CoA dehydrogenases Electron transfer flavoprotein, alpha subunit                                                                                                                                                                     |
| TS28Fae08712 CDS CDS        | 26.5 | 7.0   | 17.2 | C I | COG1960 COG2025                                                 | Acyl-CoA dehydrogenases Electron transfer flavoprotein, alpha subunit                                                                                                                                                                     |
| Acac2774 CDS CDS            | 7.0  | 2.0   | 15.9 | C I | COG1592 COG1607                                                 | Rubrerythrin Acyl-CoA hydrolase                                                                                                                                                                                                           |
| BactD22531 CDS CDS          | 3.3  | 1.0   | 14.9 | C I | COG1592 COG1607                                                 | Rubrerythrin Acyl-CoA hydrolase                                                                                                                                                                                                           |
| TS28Fae20638 CDS CDS        | 41.5 | 13.0  | 14.5 | C I | COG1960 COG2025                                                 | Acyl-CoA dehydrogenases Electron transfer flavoprotein, alpha subunit                                                                                                                                                                     |
| Bum0198 CDS CDS             | 12.0 | 4.5   | 12.1 | C I | COG5016 COG1038 COG0511                                         | Pyruvate/oxaloacetate carboxyltransferase Pyruvate carboxylase Biotin carboxyl carrier protein                                                                                                                                            |
| Bum0879 CDS CDS             | 5.2  | 2.0   | 11.7 | C I | COG2025 COG1960                                                 | Electron transfer flavoprotein, alpha subunit Acyl-CoA dehydrogenases                                                                                                                                                                     |
| Cspl.21839 CDS CDS          | 3.2  | 1.3   | 10.9 | C I | COG1592 COG1853 COG1607                                         | Rubrerythrin Conserved protein/domain typically associated with flavoprotein oxygenases, DIM6/NTAB family Acyl-CoA hydrolase                                                                                                              |
| BactD14019 CDS CDS          | 5.2  | 2.3   | 10.1 | C I | COG1592 COG1607                                                 | Rubrerythrin Acyl-CoA hydrolase                                                                                                                                                                                                           |
| Bova2162 CDS CDS            | 5.2  | 2.3   | 10.1 | C I | COG1592 COG1607                                                 | Rubrerythrin Acyl-CoA hydrolase                                                                                                                                                                                                           |
| TS29Bac03567 CDS CDS        | 5.2  | 2.3   | 10.1 | C I | COG1592 COG1607                                                 | Rubrerythrin Acyl-CoA hydrolase                                                                                                                                                                                                           |

|                         |       |       |       |       |                                         |                                                                                                                                                                                                                                                                                                                                                                                                                                                                           |
|-------------------------|-------|-------|-------|-------|-----------------------------------------|---------------------------------------------------------------------------------------------------------------------------------------------------------------------------------------------------------------------------------------------------------------------------------------------------------------------------------------------------------------------------------------------------------------------------------------------------------------------------|
| TS28Fae20631 CDS CDS    | 4.5   | 1.0   | 20.4  | C K   | COG0427 COG0454                         | Acetyl-CoA hydrolase Histone acetyltransferase HPA2 and related acetyltransferases                                                                                                                                                                                                                                                                                                                                                                                        |
| TS28Bac0879 CDS CDS     | 14.3  | 5.0   | 13.0  | C K   | COG1595 COG5016 COG1038                 | DNA-directed RNA polymerase specialized sigma subunit, sigma24 homolog Pyruvate:oxaloacetate carboxyltransferase Pyruvate carboxylase                                                                                                                                                                                                                                                                                                                                     |
| TS28Bac6174 CDS CDS     | 3.3   | 0.5   | 30.3  | C L   | COG1372 COG1155                         | Intein/homing endonuclease Archaea vacuolar-type H+-ATPase subunit A                                                                                                                                                                                                                                                                                                                                                                                                      |
| TS29Met0241 CDS CDS     | 2.2   | 0.9   | 11.1  | C L   | COG1156 COG1372 COG1155                 | Archaea vacuolar-type H+-ATPase subunit B Intein/homing endonuclease Archaea vacuolar-type H+-ATPase subunit A                                                                                                                                                                                                                                                                                                                                                            |
| Bxy11990 CDS CDS        | 11.7  | 1.0   | 53.0  | C M G | COG3507 COG3291 COG2273 COG5498 COG3488 | Beta-xylosidase FOG: PKD repeat Beta-glucanase/Beta-glucan synthetase Predicted glycosyl hydrolase Predicted thiol oxidoreductase                                                                                                                                                                                                                                                                                                                                         |
| Cbol1698 CDS CDS        | 62.0  | 4.0   | 70.4  | C O   | COG0526 COG0492                         | Thiol-disulfide isomerase and thioredoxins Thioredoxin reductase                                                                                                                                                                                                                                                                                                                                                                                                          |
| BD11978 CDS thioredoxin | 19.0  | 2.0   | 43.1  | C O   | COG0526 COG3118                         | Thiol-disulfide isomerase and thioredoxins Thioredoxin domain-containing protein                                                                                                                                                                                                                                                                                                                                                                                          |
| Dfor0624 CDS CDS        | 42.5  | 6.0   | 32.2  | C O   | COG0526 COG0492                         | Thiol-disulfide isomerase and thioredoxins Thioredoxin reductase                                                                                                                                                                                                                                                                                                                                                                                                          |
| Dfor0623 CDS CDS        | 7.0   | 1.0   | 31.8  | C O   | COG0526                                 | Thiol-disulfide isomerase and thioredoxins                                                                                                                                                                                                                                                                                                                                                                                                                                |
| BD11711 CDS thioredoxin | 16.0  | 3.0   | 24.2  | C O   | COG0526 COG3118                         | Thiol-disulfide isomerase and thioredoxins Thioredoxin domain-containing protein                                                                                                                                                                                                                                                                                                                                                                                          |
| Cbol1697 CDS CDS        | 10.0  | 2.0   | 22.7  | C O   | COG0526                                 | Thiol-disulfide isomerase and thioredoxins                                                                                                                                                                                                                                                                                                                                                                                                                                |
| Dfor2069 CDS CDS        | 7.0   | 2.0   | 15.9  | C O   | COG0526                                 | Thiol-disulfide isomerase and thioredoxins                                                                                                                                                                                                                                                                                                                                                                                                                                |
| Bun11323 CDS CDS        | 6.0   | 2.0   | 13.6  | C O   | COG0526 COG0229 COG0225                 | Thiol-disulfide isomerase and thioredoxins Conserved domain frequently associated with peptide methionine sulfoxide reductase Peptide methionine sulfoxide reductase                                                                                                                                                                                                                                                                                                      |
| Aput2323 CDS CDS        | 6.0   | 2.0   | 13.6  | C O   | COG0526 COG0785                         | Thiol-disulfide isomerase and thioredoxins Cytochrome c biogenesis protein                                                                                                                                                                                                                                                                                                                                                                                                |
| Dlon0990 CDS CDS        | 6.0   | 2.0   | 13.6  | C O   | COG0526 COG0492                         | Thiol-disulfide isomerase and thioredoxins Thioredoxin reductase                                                                                                                                                                                                                                                                                                                                                                                                          |
| Dcom1705 CDS CDS        | 11.0  | 4.0   | 12.5  | C O   | COG0526 COG0492                         | Thiol-disulfide isomerase and thioredoxins Thioredoxin reductase                                                                                                                                                                                                                                                                                                                                                                                                          |
| Dfor2070 CDS CDS        | 11.0  | 4.0   | 12.5  | C O   | COG0526 COG0492                         | Thiol-disulfide isomerase and thioredoxins Thioredoxin reductase                                                                                                                                                                                                                                                                                                                                                                                                          |
| Cbol5405 CDS CDS        | 5.0   | 2.0   | 11.3  | C O   | COG0526 COG0492                         | Thiol-disulfide isomerase and thioredoxins Thioredoxin reductase                                                                                                                                                                                                                                                                                                                                                                                                          |
| Bxy14091 CDS CDS        | 9.0   | 4.0   | 10.2  | C O   | COG0526 COG3118                         | Thiol-disulfide isomerase and thioredoxins Thioredoxin domain-containing protein                                                                                                                                                                                                                                                                                                                                                                                          |
| TS29Coi1519 CDS CDS     | 2.0   | 137.0 | 0.1   | C P   | COG1009 COG2111 COG0650                 | NADH:ubiquinone oxidoreductase subunit 5 (chain L)/Multisubunit Na+/H+ antiporter, MnhA subunit Multisubunit Na+/H+ antiporter, MnhB subunit Formate hydrogenlyase subunit 4                                                                                                                                                                                                                                                                                              |
| TS28Dor3117 CDS CDS     | 3.0   | 1.3   | 10.2  | C P V | COG1131 COG4152 COG4555                 | ABC-type multidrug transport system, ATPase component ABC-type uncharacterized transport system, ATPase component ABC-type Na+ transport system, ATPase component                                                                                                                                                                                                                                                                                                         |
| TS29Bif3316 CDS CDS     | 0.2   | 25.9  | 0.0   | C P V | COG1131 COG4152 COG4586 COG4555         | ABC-type multidrug transport system, ATPase component ABC-type uncharacterized transport system, ATPase component ABC-type uncharacterized transport system, ATPase component ABC-type Na+ transport system, ATPase component                                                                                                                                                                                                                                             |
| TS28Bif4720 CDS CDS     | 0.2   | 25.9  | 0.0   | C P V | COG1131 COG4152 COG4586 COG4555         | ABC-type multidrug transport system, ATPase component ABC-type uncharacterized transport system, ATPase component ABC-type uncharacterized transport system, ATPase component ABC-type Na+ transport system, ATPase component                                                                                                                                                                                                                                             |
| TS28Rum15626 CDS CDS    | 42.8  | 1.5   | 129.5 | C Q   | COG4577                                 | Carbon dioxide concentrating mechanism/carboxysome shell protein                                                                                                                                                                                                                                                                                                                                                                                                          |
| Robe3271 CDS CDS        | 12.5  | 0.5   | 113.5 | C Q   | COG4577                                 | Carbon dioxide concentrating mechanism/carboxysome shell protein                                                                                                                                                                                                                                                                                                                                                                                                          |
| Ehal0413 CDS CDS        | 6.0   | 0.5   | 54.5  | C Q   | COG4577                                 | Carbon dioxide concentrating mechanism/carboxysome shell protein                                                                                                                                                                                                                                                                                                                                                                                                          |
| TS28Eub0625 CDS CDS     | 6.0   | 0.5   | 54.5  | C Q   | COG4577                                 | Carbon dioxide concentrating mechanism/carboxysome shell protein                                                                                                                                                                                                                                                                                                                                                                                                          |
| TS28Bac7267 CDS CDS     | 6.0   | 0.7   | 40.9  | C O   | COG0282 COG4869                         | Acetate kinase Propanediol utilization protein                                                                                                                                                                                                                                                                                                                                                                                                                            |
| Bun10164 CDS CDS        | 6.0   | 0.7   | 40.9  | C Q   | COG0282 COG4869                         | Acetate kinase Propanediol utilization protein                                                                                                                                                                                                                                                                                                                                                                                                                            |
| Robe3277 CDS CDS        | 2.7   | 0.5   | 24.5  | C Q   | COG4577                                 | Carbon dioxide concentrating mechanism/carboxysome shell protein                                                                                                                                                                                                                                                                                                                                                                                                          |
| TS28Rum15682 CDS CDS    | 7.0   | 1.5   | 21.3  | C Q   | COG4577                                 | Carbon dioxide concentrating mechanism/carboxysome shell protein                                                                                                                                                                                                                                                                                                                                                                                                          |
| TS29Rum08440 CDS CDS    | 16.0  | 4.0   | 18.2  | C Q   | COG4577                                 | Carbon dioxide concentrating mechanism/carboxysome shell protein                                                                                                                                                                                                                                                                                                                                                                                                          |
| TS29Rum00111 CDS CDS    | 64.8  | 17.5  | 16.8  | C Q   | COG4577                                 | Carbon dioxide concentrating mechanism/carboxysome shell protein                                                                                                                                                                                                                                                                                                                                                                                                          |
| TS29Rum12353 CDS CDS    | 26.3  | 8.0   | 14.9  | C Q   | COG4577                                 | Carbon dioxide concentrating mechanism/carboxysome shell protein                                                                                                                                                                                                                                                                                                                                                                                                          |
| Cbol6610 CDS CDS        | 3.0   | 1.0   | 13.6  | C Q   | COG4577                                 | Carbon dioxide concentrating mechanism/carboxysome shell protein                                                                                                                                                                                                                                                                                                                                                                                                          |
| TS28Rum04248 CDS CDS    | 3.0   | 1.0   | 13.6  | C Q   | COG0282 COG4869                         | Acetate kinase Propanediol utilization protein                                                                                                                                                                                                                                                                                                                                                                                                                            |
| Rumhyd2638 CDS CDS      | 3.0   | 1.0   | 13.6  | C Q   | COG0282 COG4869                         | Acetate kinase Propanediol utilization protein                                                                                                                                                                                                                                                                                                                                                                                                                            |
| TS28Rum15627 CDS CDS    | 8.8   | 3.5   | 11.3  | C Q   | COG4577                                 | Carbon dioxide concentrating mechanism/carboxysome shell protein                                                                                                                                                                                                                                                                                                                                                                                                          |
| Bbre1583 CDS CDS        | 3.3   | 0.3   | 44.3  | C V O | COG2274 COG1132 COG4987 COG4988 COG5265 | ABC-type bacteriocin/lantibiotic exporters, contain an N-terminal double-glycine peptidase domain ABC-type multidrug transport system, ATPase and permease components ABC-type transport system involved in cytochrome bd biosynthesis, fused ATPase and permease components ABC-type transport system involved in cytochrome bd biosynthesis, ATPase and permease components ABC-type transport system involved in Fe-S cluster assembly, permease and ATPase components |
| RintL11975 CDS CDS      | 8.0   | 3.0   | 12.1  | C V O | COG1132 COG4988 COG5265                 | ABC-type multidrug transport system, ATPase and permease components ABC-type transport system involved in cytochrome bd biosynthesis, ATPase and permease components ABC-type transport system involved in Fe-S cluster assembly, permease and ATPase components                                                                                                                                                                                                          |
| TS28Rum13672 CDS CDS    | 20.5  | 1.0   | 93.1  | D     | COG3640                                 | CO dehydrogenase maturation factor                                                                                                                                                                                                                                                                                                                                                                                                                                        |
| TS29Fae09031 CDS CDS    | 5.5   | 0.5   | 49.9  | D     | COG2184                                 | Protein involved in cell division                                                                                                                                                                                                                                                                                                                                                                                                                                         |
| TS28Col1205 CDS CDS     | 10.0  | 1.0   | 45.4  | D     | COG0206                                 | Cell division GTPase                                                                                                                                                                                                                                                                                                                                                                                                                                                      |
| Rumhyd2687 CDS CDS      | 9.0   | 1.0   | 40.9  | D     | COG3640                                 | CO dehydrogenase maturation factor                                                                                                                                                                                                                                                                                                                                                                                                                                        |
| TS29Rum13366 CDS CDS    | 206.5 | 28.5  | 32.9  | D     | COG3640                                 | CO dehydrogenase maturation factor                                                                                                                                                                                                                                                                                                                                                                                                                                        |
| TS28Fae02149 CDS CDS    | 19.0  | 3.0   | 28.8  | D     | COG3599                                 | Cell division initiation protein                                                                                                                                                                                                                                                                                                                                                                                                                                          |
| Casp3452 CDS CDS        | 12.3  | 2.0   | 27.8  | D     | COG0206                                 | Cell division GTPase                                                                                                                                                                                                                                                                                                                                                                                                                                                      |
| Dlon1840 CDS CDS        | 6.0   | 1.0   | 27.2  | D     | COG0772                                 | Bacterial cell division membrane protein                                                                                                                                                                                                                                                                                                                                                                                                                                  |
| TS29Rum17365 CDS CDS    | 3.0   | 0.5   | 27.2  | D     | COG3640                                 | CO dehydrogenase maturation factor                                                                                                                                                                                                                                                                                                                                                                                                                                        |
| Bun13012 CDS CDS        | 14.0  | 2.5   | 25.4  | D     | COG0206                                 | Cell division GTPase                                                                                                                                                                                                                                                                                                                                                                                                                                                      |
| Bxyl2772 CDS CDS        | 1.8   | 0.3   | 25.0  | D     | COG0489                                 | ATPases involved in chromosome partitioning                                                                                                                                                                                                                                                                                                                                                                                                                               |
| BactD11569 CDS CDS      | 1.8   | 0.3   | 25.0  | D     | COG0489                                 | ATPases involved in chromosome partitioning                                                                                                                                                                                                                                                                                                                                                                                                                               |
| BactD12549 CDS CDS      | 1.8   | 0.3   | 23.8  | D     | COG2385                                 | Sporulation protein and related proteins                                                                                                                                                                                                                                                                                                                                                                                                                                  |
| Bun12388 CDS CDS        | 7.5   | 1.5   | 22.7  | D     | COG0489                                 | ATPases involved in chromosome partitioning                                                                                                                                                                                                                                                                                                                                                                                                                               |
| Rumhyd0764 CDS CDS      | 4.0   | 1.0   | 18.2  | D     | COG0206                                 | Cell division GTPase                                                                                                                                                                                                                                                                                                                                                                                                                                                      |
| Bova2776 CDS CDS        | 1.0   | 0.3   | 18.2  | D     | COG1077                                 | Actin-like ATPase involved in cell morphogenesis                                                                                                                                                                                                                                                                                                                                                                                                                          |
| BactD21851 CDS CDS      | 1.0   | 0.3   | 18.2  | D     | COG1077                                 | Actin-like ATPase involved in cell morphogenesis                                                                                                                                                                                                                                                                                                                                                                                                                          |
| Robe2011 CDS CDS        | 16.5  | 4.5   | 16.6  | D     | COG3640                                 | CO dehydrogenase maturation factor                                                                                                                                                                                                                                                                                                                                                                                                                                        |
| Bple3408 CDS CDS        | 3.3   | 1.0   | 15.1  | D     | COG1192                                 | ATPases involved in chromosome partitioning                                                                                                                                                                                                                                                                                                                                                                                                                               |
| Bcoproc1024 CDS CDS     | 3.3   | 1.0   | 15.1  | D     | COG1192                                 | ATPases involved in chromosome partitioning                                                                                                                                                                                                                                                                                                                                                                                                                               |
| Msm1751409 CDS CDS      | 3.3   | 1.0   | 14.8  | D     | COG0206                                 | Cell division GTPase                                                                                                                                                                                                                                                                                                                                                                                                                                                      |
| Msm1740271 CDS CDS      | 3.3   | 1.0   | 14.8  | D     | COG0206                                 | Cell division GTPase                                                                                                                                                                                                                                                                                                                                                                                                                                                      |
| TS28Rum10356 CDS CDS    | 8.0   | 2.5   | 14.5  | D     | COG1196                                 | Chromosome segregation ATPases                                                                                                                                                                                                                                                                                                                                                                                                                                            |
| Clep0715 CDS CDS        | 5.0   | 1.7   | 13.6  | D     | COG2894 COG0455                         | Septum formation inhibitor-activating ATPase ATPases involved in chromosome partitioning                                                                                                                                                                                                                                                                                                                                                                                  |

|                        |      |       |       |       |                                     |                                                                                                                                                                                                                  |
|------------------------|------|-------|-------|-------|-------------------------------------|------------------------------------------------------------------------------------------------------------------------------------------------------------------------------------------------------------------|
| TS29Clo4347/CDS/CDS    | 5.0  | 1.7   | 13.6  | D     | COG2894/COG0455                     | Septum formation inhibitor-activating ATPase ATPases involved in chromosome partitioning                                                                                                                         |
| Bthe3730956/CDS/CDS    | 1.0  | 0.3   | 13.6  | D     | COG1192                             | ATPases involved in chromosome partitioning                                                                                                                                                                      |
| TS28Fae18349/CDS/CDS   | 1.5  | 0.5   | 13.6  | D     | COG0772                             | Bacterial cell division membrane protein                                                                                                                                                                         |
| TS28Rum12409/CDS/CDS   | 1.5  | 0.5   | 13.6  | D     | COG1196                             | Chromosome segregation ATPases                                                                                                                                                                                   |
| Acol2658/CDS/CDS       | 3.0  | 1.0   | 13.6  | D     | COG1196                             | Chromosome segregation ATPases                                                                                                                                                                                   |
| TS28Rum00123/CDS/CDS   | 4.5  | 1.5   | 13.6  | D     | COG0489                             | ATPases involved in chromosome partitioning                                                                                                                                                                      |
| ShigspD90371/CDS/CDS   | 2.8  | 1.0   | 12.9  | D     | COG3096                             | Uncharacterized protein involved in chromosome partitioning                                                                                                                                                      |
| Aput0467/CDS/CDS       | 33.5 | 12.0  | 12.7  | D     | COG0206                             | Cell division GTPase                                                                                                                                                                                             |
| TS28Col0667/CDS/CDS    | 11.0 | 4.0   | 12.5  | D     | COG3599                             | Cell division initiation protein                                                                                                                                                                                 |
| Buni3010/CDS/CDS       | 16.2 | 6.0   | 12.2  | D     | COG0849                             | Actin-like ATPase involved in cell division                                                                                                                                                                      |
| Rior2137/CDS/CDS       | 1.3  | 0.5   | 12.1  | D     | COG0850                             | Septum formation inhibitor                                                                                                                                                                                       |
| TS29Rum19274/CDS/CDS   | 45.8 | 19.5  | 10.7  | D     | COG0206                             | Cell division GTPase                                                                                                                                                                                             |
| TS28Fae19350/CDS/CDS   | 7.0  | 3.0   | 10.6  | D     | COG3599                             | Cell division initiation protein                                                                                                                                                                                 |
| TS29Fae08499/CDS/CDS   | 1.0  | 49.0  | 0.1   | D     | COG1192                             | ATPases involved in chromosome partitioning                                                                                                                                                                      |
| TS29Bif2523/CDS/CDS    | 2.0  | 105.0 | 0.1   | D     | COG1674                             | DNA segregation ATPase FtsK/SpoIIIE and related proteins                                                                                                                                                         |
| TS29Fae09303/CDS/CDS   | 1.5  | 79.0  | 0.1   | D     | COG1674                             | DNA segregation ATPase FtsK/SpoIIIE and related proteins                                                                                                                                                         |
| TS29Rum00036/CDS/CDS   | 0.5  | 28.0  | 0.1   | D     | COG0424                             | Nucleotide-binding protein implicated in inhibition of septum formation                                                                                                                                          |
| TS28Fae18705/CDS/CDS   | 0.5  | 28.0  | 0.1   | D     | COG0037                             | Predicted ATPase of the PP-loop superfamily implicated in cell cycle control                                                                                                                                     |
| Dfor3114/CDS/CDS       | 0.5  | 30.8  | 0.1   | D     | COG1192                             | ATPases involved in chromosome partitioning                                                                                                                                                                      |
| TS29RumUnc1679/CDS/CDS | 1.0  | 66.0  | 0.1   | D     | COG0772                             | Bacterial cell division membrane protein                                                                                                                                                                         |
| CspM6211948/CDS/CDS    | 0.5  | 34.7  | 0.1   | D     | COG1192                             | ATPases involved in chromosome partitioning                                                                                                                                                                      |
| TS29Rum19437/CDS/CDS   | 1.0  | 74.5  | 0.1   | D     | COG1674                             | DNA segregation ATPase FtsK/SpoIIIE and related proteins                                                                                                                                                         |
| TS28Fae18143/CDS/CDS   | 0.5  | 37.5  | 0.1   | D     | COG1192                             | ATPases involved in chromosome partitioning                                                                                                                                                                      |
| TS29Fae00047/CDS/CDS   | 0.5  | 37.5  | 0.1   | D     | COG1192                             | ATPases involved in chromosome partitioning                                                                                                                                                                      |
| TS29Fae00895/CDS/CDS   | 1.5  | 124.5 | 0.1   | D     | COG5279                             | Uncharacterized protein involved in cytokinesis, contains TGc (transglutaminase/protease-like) domain                                                                                                            |
| TS29Rum12397/CDS/CDS   | 0.5  | 47.5  | 0.0   | D     | COG0445                             | NAD/FAD-utilizing enzyme apparently involved in cell division                                                                                                                                                    |
| TS29Fae08494/CDS/CDS   | 1.1  | 110.5 | 0.0   | D     | COG0445                             | NAD/FAD-utilizing enzyme apparently involved in cell division                                                                                                                                                    |
| TS29Rum16532/CDS/CDS   | 0.3  | 32.3  | 0.0   | D     | COG2184                             | Protein involved in cell division                                                                                                                                                                                |
| TS29Rum11742/CDS/CDS   | 1.0  | 104.0 | 0.0   | D     | COG1192                             | ATPases involved in chromosome partitioning                                                                                                                                                                      |
| TS29Bac07786/CDS/CDS   | 0.3  | 28.2  | 0.0   | D     | COG0772                             | Bacterial cell division membrane protein                                                                                                                                                                         |
| TS29Bac09561/CDS/CDS   | 0.2  | 25.0  | 0.0   | D     | COG0445                             | NAD/FAD-utilizing enzyme apparently involved in cell division                                                                                                                                                    |
| TS29Bif0528/CDS/CDS    | 0.3  | 78.9  | 0.0   | D     | COG0772                             | Bacterial cell division membrane protein                                                                                                                                                                         |
| TS28Bif497/CDS/CDS     | 0.3  | 78.9  | 0.0   | D     | COG0772                             | Bacterial cell division membrane protein                                                                                                                                                                         |
| TS29Bif2423/CDS/CDS    | 0.3  | 91.8  | 0.0   | D     | COG0772                             | Bacterial cell division membrane protein                                                                                                                                                                         |
| TS29Bif2465/CDS/CDS    | 0.3  | 234.7 | 0.0   | D     | COG1196                             | Chromosome segregation ATPases                                                                                                                                                                                   |
| Rumhyd1512/CDS/CDS     | 0.2  | 28.0  | 0.0   | D V Q | COG1136/COG4181 <br>COG2884         | ABC-type antimicrobial peptide transport system, ATPase component Predicted ABC-type transport system involved in lysophospholipase L1 biosynthesis, ATPase component Predicted ATPase involved in cell division |
| TS28Dor0707/CDS/CDS    | 14.9 | 0.5   | 135.4 | E     | COG0686                             | Alanine dehydrogenase                                                                                                                                                                                            |
| Dlon0626/CDS/CDS       | 12.9 | 0.5   | 117.3 | E     | COG0686                             | Alanine dehydrogenase                                                                                                                                                                                            |
| BDI2672/CDS arginase   | 20.0 | 1.0   | 90.8  | E     | COG1359/COG4992 <br>COG1982/COG0010 | Uncharacterized conserved protein Ornithine/acetylornithine aminotransferase Arginine/lysine/ornithine decarboxylases Arginase/agmatinase/formimionoglutamate hydrolase, arginase family                         |
| Buni2819/CDS/CDS       | 14.0 | 1.0   | 63.6  | E     | COG2195                             | Di- and tripeptidases                                                                                                                                                                                            |
| Buni3421/CDS/CDS       | 6.5  | 0.5   | 59.0  | E     | COG0019/COG0527                     | Diaminopimelate decarboxylase Aspartokinases                                                                                                                                                                     |
| TS28Fae18414/CDS/CDS   | 6.5  | 0.5   | 59.0  | E     | COG0460                             | Homoserine dehydrogenase                                                                                                                                                                                         |
| TS28Rum13611/CDS/CDS   | 32.0 | 2.5   | 58.1  | E     | COG0014                             | Gamma-glutamyl phosphate reductase                                                                                                                                                                               |
| Buni1224/CDS/CDS       | 43.9 | 4.0   | 49.8  | E     | COG0334                             | Glutamate dehydrogenase/leucine dehydrogenase                                                                                                                                                                    |
| CspM6212980/CDS/CDS    | 30.5 | 3.0   | 46.2  | E     | COG0334                             | Glutamate dehydrogenase/leucine dehydrogenase                                                                                                                                                                    |
| FprM2120941/CDS/CDS    | 5.0  | 0.5   | 45.4  | E     | COG2502                             | Asparagine synthetase A                                                                                                                                                                                          |
| TS28Aii0217/CDS/CDS    | 10.0 | 1.0   | 45.4  | E     | COG1506                             | Dipeptidyl aminopeptidases/acvlaminoacyl-peptidases                                                                                                                                                              |
| TS28Dor0655/CDS/CDS    | 9.0  | 1.0   | 40.9  | E     | COG0531                             | Amino acid transporters                                                                                                                                                                                          |
| Caer1800/CDS/CDS       | 8.0  | 1.0   | 36.3  | E     | COG0722                             | 3-deoxy-D-arabino-heptulosonate 7-phosphate (DAH) synthase                                                                                                                                                       |
| TS28Rum16250/CDS/CDS   | 4.0  | 0.5   | 36.3  | E     | COG4810                             | Ethanolamine utilization protein                                                                                                                                                                                 |
| Acae3379/CDS/CDS       | 8.0  | 1.0   | 36.3  | E     | COG0128/COG0287                     | 5-enolpyruvylshikimate-3-phosphate synthase Prephenate dehydrogenase                                                                                                                                             |
| TS28RumUnc1995/CDS/CDS | 8.0  | 1.0   | 36.3  | E     | COG1126/COG4598                     | ABC-type polar amino acid transport system, ATPase component ABC-type histidine transport system, ATPase component                                                                                               |
| Aput1087/CDS/CDS       | 8.0  | 1.0   | 36.3  | E     | COG0334                             | Glutamate dehydrogenase/leucine dehydrogenase                                                                                                                                                                    |
| Buni0628/CDS/CDS       | 7.7  | 1.0   | 34.8  | E     | COG0006                             | Xaa-Pro aminopeptidase                                                                                                                                                                                           |
| ShigspD92234/CDS/CDS   | 3.5  | 0.5   | 31.8  | E     | COG2981                             | Uncharacterized protein involved in cysteine biosynthesis                                                                                                                                                        |
| TS28Bac2692/CDS/CDS    | 4.3  | 0.7   | 29.5  | E     | COG2987                             | Urocanate hydratase                                                                                                                                                                                              |
| CspM6210827/CDS/CDS    | 6.5  | 1.0   | 29.5  | E     | COG1775                             | Benzoyl-CoA reductase/2-hydroxyglutaryl-CoA dehydratase subunit, BcrC/BadD/HgdB                                                                                                                                  |
| Dfor0629/CDS/CDS       | 19.0 | 3.0   | 28.8  | E     | COG1115                             | Na+/alanine symporter                                                                                                                                                                                            |
| ShigspD91594/CDS/CDS   | 6.3  | 1.0   | 28.8  | E     | COG0070                             | Glutamate synthase domain 3                                                                                                                                                                                      |
| Dfor1168/CDS/CDS       | 6.0  | 1.0   | 27.2  | E     | COG2008                             | Threonine aldolase                                                                                                                                                                                               |
| Riac1849/CDS/CDS       | 6.0  | 1.0   | 27.2  | E     | COG0253                             | Diaminopimelate epimerase                                                                                                                                                                                        |
| Cbol5528/CDS/CDS       | 6.0  | 1.0   | 27.2  | E     | COG0078                             | Ornithine carbamoyltransferase                                                                                                                                                                                   |
| TS28Col1292/CDS/CDS    | 6.0  | 1.0   | 27.2  | E     | COG0548/COG1364                     | Acetylglutamate kinase N-acetylglutamate synthase (N-acetylornithine aminotransferase)                                                                                                                           |
| TS28Fae19190/CDS/CDS   | 6.0  | 1.0   | 27.2  | E     | COG1123/COG4608                     | ATPase components of various ABC-type transport systems, contain duplicated ATPase ABC-type oligopeptide transport system, ATPase component                                                                      |
| Bxyl3854/CDS/CDS       | 4.0  | 0.7   | 27.2  | E     | COG0040                             | ATP phosphoribosyltransferase                                                                                                                                                                                    |
| BactD13049/CDS/CDS     | 4.0  | 0.7   | 27.2  | E     | COG0040                             | ATP phosphoribosyltransferase                                                                                                                                                                                    |
| TS28Rum01864/CDS/CDS   | 33.5 | 6.0   | 25.3  | E     | COG1171                             | Threonine dehydratase                                                                                                                                                                                            |
| TS28Rum01867/CDS/CDS   | 24.3 | 4.5   | 24.5  | E     | COG0078                             | Ornithine carbamoyltransferase                                                                                                                                                                                   |
| BactD20947/CDS/CDS     | 5.3  | 1.0   | 24.0  | E     | COG0334                             | Glutamate dehydrogenase/leucine dehydrogenase                                                                                                                                                                    |
| TS28Rum13305/CDS/CDS   | 26.0 | 5.0   | 23.6  | E     | COG0493                             | NADPH-dependent glutamate synthase beta chain and related oxidoreductases                                                                                                                                        |
| TS28Rum11259/CDS/CDS   | 5.0  | 1.0   | 22.7  | E     | COG1748                             | Saccharonine dehydrogenase and related proteins                                                                                                                                                                  |
| Aput0292/CDS/CDS       | 5.0  | 1.0   | 22.7  | E     | COG0686                             | Alanine dehydrogenase                                                                                                                                                                                            |
| Cbol6056/CDS/CDS       | 5.0  | 1.0   | 22.7  | E     | COG0410/COG0411                     | ABC-type branched-chain amino acid transport systems, ATPase component ABC-type branched-chain amino acid transport systems, ATPase component                                                                    |
| TS28Col1313/CDS/CDS    | 15.0 | 3.0   | 22.7  | E     | COG0334                             | Glutamate dehydrogenase/leucine dehydrogenase                                                                                                                                                                    |
| Csci2185/CDS/CDS       | 4.7  | 1.0   | 21.3  | E     | COG3938                             | Proline racemase                                                                                                                                                                                                 |
| TS28Rum02864/CDS/CDS   | 7.0  | 1.5   | 21.2  | E     | COG0747                             | ABC-type dipeptide transport system, periplasmic component                                                                                                                                                       |
| Cbol1397/CDS/CDS       | 9.0  | 2.0   | 20.4  | E     | COG1003/COG0403                     | Glycine cleavage system protein P (pyridoxal-binding), C-terminal domain Glycine cleavage system protein P (pyridoxal-binding), N-terminal domain                                                                |
| TS28Rum13723/CDS/CDS   | 9.0  | 2.0   | 20.4  | E     | COG0436/COG1168                     | Aspartate/tyrosine/aromatic aminotransferase Bifunctional PLP-dependent enzyme with beta-cystathionase and maltose regulon repressor activities                                                                  |



|                                      |      |      |      |   |                 |                                                                                                                                                   |
|--------------------------------------|------|------|------|---|-----------------|---------------------------------------------------------------------------------------------------------------------------------------------------|
| BactD14479 CDS CDS                   | 4.3  | 1.0  | 19.7 | E | COG2987         | Urocanate hydratase                                                                                                                               |
| TS29Rum06400 CDS CDS                 | 42.0 | 10.0 | 19.1 | E | COG0624 COG3195 | Acetylornithine deacetylase/Succinyl-diaminopimelate desuccinylase and related deacylases Uncharacterized protein conserved in bacteria           |
| TS28Rum01868 CDS CDS                 | 8.0  | 2.0  | 18.2 | E | COG0549         | Carbamate kinase                                                                                                                                  |
| Bova0736 CDS CDS                     | 4.0  | 1.0  | 18.2 | E | COG2987         | Urocanate hydratase                                                                                                                               |
| Aput0090 CDS CDS                     | 4.0  | 1.0  | 18.2 | E | COG1045         | Serine acetyltransferase                                                                                                                          |
| BactD11115 CDS CDS                   | 2.0  | 0.5  | 18.2 | E | COG0509         | Glycine cleavage system H protein (lipoate-binding)                                                                                               |
| TS29Rum11025 CDS CDS                 | 4.0  | 1.0  | 18.2 | E | COG1003 COG0403 | Glycine cleavage system protein P (pyridoxal-binding), C-terminal domain Glycine cleavage system protein P (pyridoxal-binding), N-terminal domain |
| Eha11409 CDS CDS                     | 2.0  | 0.5  | 18.2 | E | COG0665 COG0579 | Glycine/D-amino acid oxidases (deaminating) Predicted dehydrogenase                                                                               |
| Acac2993 CDS CDS                     | 4.0  | 1.0  | 18.2 | E | COG0703         | Shikimate kinase                                                                                                                                  |
| TS28Fae10841 CDS CDS                 | 4.0  | 1.0  | 18.2 | E | COG1171         | Threonine dehydratase                                                                                                                             |
| Buni3618 CDS CDS                     | 2.0  | 0.5  | 18.2 | E | COG0110 COG1605 | Acetyltransferase (isoleucine patch superfamily) Chorismate mutase                                                                                |
| BFnct1597 CDS histidinol-phosphatase | 2.0  | 0.5  | 18.2 | E | COG1387         | Histidinol phosphatase and related hydrolases of the PHP family                                                                                   |
| TS28Dor1889 CDS CDS                  | 2.0  | 0.5  | 18.2 | E | COG3104         | Dipeptide/tripeptide permease                                                                                                                     |
| TS28Fae02113 CDS CDS                 | 8.0  | 2.0  | 18.2 | E | COG1897         | Homoserine trans-succinylase                                                                                                                      |
| TS28Rum11533 CDS CDS                 | 2.0  | 0.5  | 18.2 | E | COG0141         | Histidinol dehydrogenase                                                                                                                          |
| Dlon0125 CDS CDS                     | 2.0  | 0.5  | 18.2 | E | COG3104         | Dipeptide/tripeptide permease                                                                                                                     |
| Even0466 CDS CDS                     | 4.0  | 1.0  | 18.2 | E | COG0460         | Homoserine dehydrogenase                                                                                                                          |
| Rena3372 CDS CDS                     | 4.0  | 1.0  | 18.2 | E | COG0289         | Dihydrodipicolinate reductase                                                                                                                     |
| BactD11193 CDS CDS                   | 1.3  | 0.3  | 18.2 | E | COG2066         | Glutaminase                                                                                                                                       |
| TS28Bac5565 CDS CDS                  | 1.3  | 0.3  | 18.2 | E | COG1305         | Transglutaminase-like enzymes, putative cysteine proteases                                                                                        |
| TS28Clo09626 CDS CDS                 | 1.3  | 0.3  | 18.2 | E | COG0263         | Glutamate 5-kinase                                                                                                                                |
| Buni3364 CDS CDS                     | 1.3  | 0.3  | 18.2 | E | COG1305         | Transglutaminase-like enzymes, putative cysteine proteases                                                                                        |
| Bova1829 CDS CDS                     | 2.0  | 0.5  | 17.9 | E | COG0112         | Glycine/serine hydroxymethyltransferase                                                                                                           |
| BactD20631 CDS CDS                   | 2.0  | 0.5  | 17.9 | E | COG0112         | Glycine/serine hydroxymethyltransferase                                                                                                           |
| TS28Rum13609 CDS CDS                 | 3.8  | 1.0  | 17.4 | E | COG0263         | Glutamate 5-kinase                                                                                                                                |
| Bova2853 CDS CDS                     | 3.1  | 0.8  | 16.8 | E | COG0070         | Glutamate synthase domain 3                                                                                                                       |
| Bxyl1344 CDS CDS                     | 1.8  | 0.5  | 16.6 | E | COG0119         | Isopropylmalate/homocitrate/citramalate synthases                                                                                                 |
| Robe2006 CDS CDS                     | 9.0  | 2.5  | 16.3 | E | COG1410         | Methionine synthase I, cobalamin-binding domain                                                                                                   |
| Buni3493 CDS CDS                     | 7.7  | 2.2  | 16.1 | E | COG0174         | Glutamine synthetase                                                                                                                              |
| TS28Bac2259 CDS CDS                  | 7.7  | 2.2  | 16.1 | E | COG0174         | Glutamine synthetase                                                                                                                              |
| TS28Eub5273 CDS CDS                  | 1.2  | 0.3  | 15.9 | E | COG3869         | Arginine kinase                                                                                                                                   |
| FpraM2121980 CDS CDS                 | 3.5  | 1.0  | 15.9 | E | COG0709         | Selenophosphate synthase                                                                                                                          |
| TS29Rum08488 CDS CDS                 | 7.0  | 2.0  | 15.9 | E | COG0136         | Aspartate-semialdehyde dehydrogenase                                                                                                              |
| TS29Clo3826 CDS CDS                  | 14.0 | 4.0  | 15.9 | E | COG0747 COG4166 | ABC-type dipeptide transport system, periplasmic component ABC-type oligopeptide transport system, periplasmic component                          |
| TS28Col0144 CDS CDS                  | 7.0  | 2.0  | 15.9 | E | COG2987         | Urocanate hydratase                                                                                                                               |
| TS28Fae18755 CDS CDS                 | 3.5  | 1.0  | 15.9 | E | COG1126         | ABC-type polar amino acid transport system, ATPase component                                                                                      |
| TS28Rum14197 CDS CDS                 | 3.5  | 1.0  | 15.9 | E | COG0410 COG0411 | ABC-type branched-chain amino acid transport systems, ATPase component ABC-type branched-chain amino acid transport systems, ATPase component     |
| BactD11007 CDS CDS                   | 1.7  | 0.5  | 15.1 | E | COG3579         | Aminopeptidase C                                                                                                                                  |
| TS28Rum13573 CDS CDS                 | 5.0  | 1.5  | 15.1 | E | COG1362         | Aspartyl aminopeptidase                                                                                                                           |
| Cbol2809 CDS CDS                     | 10.0 | 3.0  | 15.1 | E | COG0624         | Acetylornithine deacetylase/Succinyl-diaminopimelate desuccinylase and related deacylases                                                         |
| TS29Bac07339 CDS CDS                 | 10.0 | 3.0  | 15.1 | E | COG0140 COG0139 | Phosphoribosyl-ATP pyrophosphohydrolase Phosphoribosyl-AMP cyclohydrolase                                                                         |
| Caer0388 CDS CDS                     | 69.3 | 21.0 | 15.0 | E | COG2235         | Arginine deiminase                                                                                                                                |
| Anut2087 CDS CDS                     | 23.0 | 7.0  | 14.9 | E | COG1770 COG1505 | Protease II Serine proteases of the peptidase family S9A                                                                                          |
| Chv13169 CDS CDS                     | 3.1  | 1.0  | 14.0 | E | COG0686         | Alanine dehydrogenase                                                                                                                             |
| BactD11839 CDS CDS                   | 3.1  | 1.0  | 13.9 | E | COG0112         | Glycine/serine hydroxymethyltransferase                                                                                                           |
| ShigsppD90033 CDS CDS                | 1.0  | 0.3  | 13.6 | E | COG0626         | Cystathionine beta-lyases/cystathionine gamma-synthases                                                                                           |
| Bpse0051 CDS CDS                     | 1.0  | 0.3  | 13.6 | E | COG2873         | O-acetylhomoserine sulphydrylase                                                                                                                  |
| TS28Bac3870 CDS CDS                  | 1.0  | 0.3  | 13.6 | E | COG1166         | Arginine decarboxylase (spermidine biosynthesis)                                                                                                  |
| Bxyl2491 CDS CDS                     | 1.0  | 0.3  | 13.6 | E | COG0548         | Acetylglutamate kinase                                                                                                                            |
| TS28Clo02956 CDS CDS                 | 6.0  | 2.0  | 13.6 | E | COG0165 COG1246 | Argininosuccinate lyase N-acetylglutamate synthase and related acetyltransferases                                                                 |
| Dfor1586 CDS CDS                     | 6.0  | 2.0  | 13.6 | E | COG0136         | Aspartate-semialdehyde dehydrogenase                                                                                                              |
| Ccom1370 CDS CDS                     | 6.0  | 2.0  | 13.6 | E | COG0289         | Dihydrodipicolinate reductase                                                                                                                     |
| Cbol4326 CDS CDS                     | 3.0  | 1.0  | 13.6 | E | COG2355         | Zn-dependent dipeptidase, microsomal dipeptidase homolog                                                                                          |
| Ccom1359 CDS CDS                     | 3.0  | 1.0  | 13.6 | E | COG4608 COG1123 | ABC-type oligopeptide transport system, ATPase component ATPase components of various ABC-type transport systems, contain duplicated ATPase       |
| Cbol2464 CDS CDS                     | 3.0  | 1.0  | 13.6 | E | COG0436         | Aspartate/tyrosine/aromatic aminotransferase                                                                                                      |
| TS28Bac6124 CDS CDS                  | 3.0  | 1.0  | 13.6 | E | COG1410 COG0646 | Methionine synthase I, cobalamin-binding domain Methionine synthase I (cobalamin-dependent), methyltransferase domain                             |
| TS28Fae19128 CDS CDS                 | 6.0  | 2.0  | 13.6 | E | COG1177         | ABC-type spermidine/putrescine transport system, permease component II                                                                            |
| Bcap1238 CDS CDS                     | 6.0  | 2.0  | 13.6 | E | COG4303         | Ethanolamine ammonia-lyase, large subunit                                                                                                         |
| Cnex2500 CDS CDS                     | 3.0  | 1.0  | 13.6 | E | COG0136         | Aspartate-semialdehyde dehydrogenase                                                                                                              |
| Bcap3331 CDS CDS                     | 6.0  | 2.0  | 13.6 | E | COG0006         | Xaa-Pro aminopeptidase                                                                                                                            |
| TS28Rum15684 CDS CDS                 | 9.9  | 3.3  | 13.5 | E | COG1063         | Threonine dehydrogenase and related Zn-dependent dehydrogenases                                                                                   |
| TS29Bac03111 CDS CDS                 | 26.7 | 9.0  | 13.5 | E | COG0031         | Cysteine synthase                                                                                                                                 |
| TS29Dor1624 CDS CDS                  | 17.8 | 6.0  | 13.4 | E | COG0686         | Alanine dehydrogenase                                                                                                                             |
| TS29Bac03244 CDS CDS                 | 11.5 | 4.0  | 13.1 | E | COG0334         | Glutamate dehydrogenase/leucine dehydrogenase                                                                                                     |
| Bfin0217 CDS CDS                     | 1.4  | 0.5  | 12.9 | E | COG2873         | O-acetylhomoserine sulphydrylase                                                                                                                  |
| Buni0596 CDS CDS                     | 4.7  | 1.7  | 12.7 | E | COG3643         | Glutamate formiminotransferase                                                                                                                    |
| TS28Bif2245 CDS CDS                  | 2.3  | 0.8  | 12.7 | E | COG1760         | L-serine deaminase                                                                                                                                |
| Bxyl2991 CDS CDS                     | 7.4  | 2.7  | 12.6 | E | COG2755 COG3401 | Lysophospholipase L1 and related esterases Fibronectin type 3 domain-containing protein                                                           |
| Bova0053 CDS CDS                     | 2.7  | 1.0  | 12.4 | E | COG0334         | Glutamate dehydrogenase/leucine dehydrogenase                                                                                                     |
| Dlon0161 CDS CDS                     | 5.5  | 2.0  | 12.4 | E | COG3938         | Proline racemase                                                                                                                                  |
| TS28Fae03687 CDS CDS                 | 8.0  | 3.0  | 12.1 | E | COG1760         | L-serine deaminase                                                                                                                                |
| BactD11598 CDS CDS                   | 1.3  | 0.5  | 12.1 | E | COG0287         | Prephenate dehydrogenase                                                                                                                          |
| TS28Dor0367 CDS CDS                  | 8.0  | 3.0  | 12.0 | E | COG3938         | Proline racemase                                                                                                                                  |
| TS28Rum01865 CDS CDS                 | 25.2 | 10.0 | 11.4 | E | COG0624         | Acetylornithine deacetylase/Succinyl-diaminopimelate desuccinylase and related deacylases                                                         |
| Robe3472 CDS CDS                     | 0.8  | 0.3  | 11.3 | E | COG0079         | Histidinol-phosphate/aromatic aminotransferase and coberic acid decarboxylase                                                                     |
| TS29Bac04218 CDS CDS                 | 2.5  | 1.0  | 11.3 | E | COG1760         | L-serine deaminase                                                                                                                                |
| Buni2088 CDS CDS                     | 2.5  | 1.0  | 11.3 | E | COG0112         | Glycine/serine hydroxymethyltransferase                                                                                                           |
| Acol3044 CDS CDS                     | 10.0 | 4.0  | 11.3 | E | COG3033         | Trvptophanase                                                                                                                                     |
| TS28Rum09533 CDS CDS                 | 5.0  | 2.0  | 11.3 | E | COG0440         | Acetolactate synthase, small (regulatory) subunit                                                                                                 |
| TS29Rum10908 CDS CDS                 | 5.0  | 2.0  | 11.3 | E | COG1362         | Aspartyl aminopeptidase                                                                                                                           |
| Bova4190 CDS CDS                     | 1.3  | 0.5  | 11.3 | E | COG1760         | L-serine deaminase                                                                                                                                |

|                        |      |       |      |   |                 |                                                                                                                                                 |
|------------------------|------|-------|------|---|-----------------|-------------------------------------------------------------------------------------------------------------------------------------------------|
| TS29Rum19010 CDS CDS   | 27.0 | 11.0  | 11.1 | E | COG1410         | Methionine synthase I, cobalamin-binding domain                                                                                                 |
| TS28Fae01474 CDS CDS   | 3.7  | 1.5   | 11.1 | E | COG0460         | Homoserine dehydrogenase                                                                                                                        |
| TS29Bac11144 CDS CDS   | 40.9 | 17.0  | 10.9 | E | COG0334         | Glutamate dehydrogenase/leucine dehydrogenase                                                                                                   |
| Bthe7335567 CDS CDS    | 6.0  | 2.5   | 10.9 | E | COG0686         | Alanine dehydrogenase                                                                                                                           |
| BactD20930 CDS CDS     | 2.4  | 1.0   | 10.9 | E | COG0334         | Glutamate dehydrogenase/leucine dehydrogenase                                                                                                   |
| TS28Rum09539 CDS CDS   | 9.3  | 4.0   | 10.6 | E | COG0136         | Aspartate-semialdehyde dehydrogenase                                                                                                            |
| Clep0705 CDS CDS       | 7.0  | 3.0   | 10.6 | E | COG1104         | Cysteine sulfinate desulfinate/cysteine desulfurase and related enzymes                                                                         |
| Dlon2773 CDS CDS       | 2.3  | 1.0   | 10.6 | E | COG2355         | Zn-dependent dipeptidase, microsomal dipeptidase homolog                                                                                        |
| TS28Bac5243 CDS CDS    | 2.3  | 1.0   | 10.6 | E | COG2008         | Threonine aldolase                                                                                                                              |
| TS28Eub8503 CDS CDS    | 8.0  | 3.5   | 10.4 | E | COG0520         | Selenocysteine lyase                                                                                                                            |
| BactD22465 CDS CDS     | 0.8  | 0.3   | 10.2 | E | COG1045 COG2151 | Serine acetyltransferase Predicted metal-sulfur cluster biosynthetic enzyme                                                                     |
| TS28Rum11618 CDS CDS   | 4.5  | 2.0   | 10.2 | E | COG0174         | Glutamine synthetase                                                                                                                            |
| TS28Bif2022 CDS CDS    | 0.5  | 22.8  | 0.1  | E | COG0436         | Aspartate/tyrosine/aromatic aminotransferase                                                                                                    |
| TS29Bif3111 CDS CDS    | 1.0  | 45.5  | 0.1  | E | COG0014         | Gamma-glutamyl phosphate reductase                                                                                                              |
| TS29Bif2878 CDS CDS    | 0.5  | 22.8  | 0.1  | E | COG0436         | Aspartate/tyrosine/aromatic aminotransferase                                                                                                    |
| TS28Bif3412 CDS CDS    | 0.8  | 34.5  | 0.1  | E | COG0006         | Xaa-Pro aminopeptidase                                                                                                                          |
| TS29Rum11505 CDS CDS   | 1.0  | 46.0  | 0.1  | E | COG1123 COG4608 | ATPase components of various ABC-type transport systems, contain duplicated ATPase ABC-type oligopeptide transport system, ATPase component     |
| TS29Col1172 CDS CDS    | 1.0  | 47.0  | 0.1  | E | COG0460         | Homoserine dehydrogenase                                                                                                                        |
| TS29Bac08799 CDS CDS   | 0.5  | 23.5  | 0.1  | E | COG4690         | Dipeptidase                                                                                                                                     |
| TS29Bif3924 CDS CDS    | 0.7  | 31.7  | 0.1  | E | COG0110 COG1605 | Acetyltransferase (isoleucine patch superfamily) Chorismate mutase                                                                              |
| TS29RumUnc0615 CDS CDS | 2.0  | 97.0  | 0.1  | E | COG1305         | Transglutaminase-like enzymes, putative cysteine proteases                                                                                      |
| TS29Bif3520 CDS CDS    | 2.2  | 105.3 | 0.1  | E | COG1505 COG1770 | Serine proteases of the peptidase family S9A Protease II                                                                                        |
| TS28Bif4961 CDS CDS    | 2.2  | 105.3 | 0.1  | E | COG1505 COG1770 | Serine proteases of the peptidase family S9A Protease II                                                                                        |
| TS29RumUnc0655 CDS CDS | 1.0  | 50.0  | 0.1  | E | COG0367         | Asparagine synthase (glutamine-hydrolyzing)                                                                                                     |
| TS29Rum20044 CDS CDS   | 1.0  | 50.0  | 0.1  | E | COG0436         | Aspartate/tyrosine/aromatic aminotransferase                                                                                                    |
| TS28Fae16508 CDS CDS   | 0.5  | 25.0  | 0.1  | E | COG0031         | Cysteine synthase                                                                                                                               |
| TS29Rum19983 CDS CDS   | 1.0  | 51.0  | 0.1  | E | COG2873         | O-acetylhomoserine sulphydrylase                                                                                                                |
| TS29Bif3486 CDS CDS    | 2.5  | 129.5 | 0.1  | E | COG0308         | Aminopeptidase N                                                                                                                                |
| TS29Bac03354 CDS CDS   | 0.5  | 26.0  | 0.1  | E | COG0006         | Xaa-Pro aminopeptidase                                                                                                                          |
| Bxyl1347 CDS CDS       | 0.1  | 6.5   | 0.1  | E | COG0119         | Isopropylmalate/homocitrate/citramalate synthases                                                                                               |
| TS28Fae18160 CDS CDS   | 0.5  | 26.0  | 0.1  | E | COG2008         | Threonine aldolase                                                                                                                              |
| Bun12157 CDS CDS       | 0.3  | 17.8  | 0.1  | E | COG0591 COG4146 | Na+/proline symporter Predicted symporter                                                                                                       |
| Robe0045 CDS CDS       | 0.6  | 32.0  | 0.1  | E | COG3340         | Pentidase E                                                                                                                                     |
| TS29RumUnc1228 CDS CDS | 1.0  | 54.0  | 0.1  | E | COG0367         | Asparagine synthase (glutamine-hydrolyzing)                                                                                                     |
| TS28Fae21249 CDS CDS   | 0.3  | 18.0  | 0.1  | E | COG0137         | Argininosuccinate synthase                                                                                                                      |
| Clep1279 CDS CDS       | 0.1  | 7.0   | 0.1  | E | COG2355         | Zn-dependent dipeptidase, microsomal dipeptidase homolog                                                                                        |
| TS28Fae10044 CDS CDS   | 0.3  | 14.0  | 0.1  | E | COG4992         | Ornithine/acetylornithine aminotransferase                                                                                                      |
| TS28Fae14980 CDS CDS   | 0.5  | 28.0  | 0.1  | E | COG4177         | ABC-type branched-chain amino acid transport system, permease component                                                                         |
| Rbro0079 CDS CDS       | 0.5  | 28.3  | 0.1  | E | COG0070         | Glutamate synthase domain 3                                                                                                                     |
| TS29Fae08560 CDS CDS   | 1.5  | 85.5  | 0.1  | E | COG0367         | Asparagine synthase (glutamine-hydrolyzing)                                                                                                     |
| TS29RumUnc0021 CDS CDS | 1.0  | 58.0  | 0.1  | E | COG1760         | L-serine deaminase                                                                                                                              |
| TS28Rum13901 CDS CDS   | 0.3  | 19.3  | 0.1  | E | COG3968 COG0174 | Uncharacterized protein related to glutamine synthetase Glutamine synthetase                                                                    |
| TS28Fae19462 CDS CDS   | 1.0  | 58.5  | 0.1  | E | COG0436         | Aspartate/tyrosine/aromatic aminotransferase                                                                                                    |
| TS29Fae09984 CDS CDS   | 1.5  | 88.5  | 0.1  | E | COG1982         | Arginine/lysine/ornithine decarboxylases                                                                                                        |
| TS28Fae01764 CDS CDS   | 0.7  | 39.5  | 0.1  | E | COG1982         | Arginine/lysine/ornithine decarboxylases                                                                                                        |
| TS28Fae12080 CDS CDS   | 0.5  | 30.0  | 0.1  | E | COG0263         | Glutamate 5-kinase                                                                                                                              |
| TS29Rum17182 CDS CDS   | 0.5  | 30.0  | 0.1  | E | COG2755         | Lysophospholipase L1 and related esterases                                                                                                      |
| TS29Fae08006 CDS CDS   | 0.5  | 30.5  | 0.1  | E | COG0070         | Glutamate synthase domain 3                                                                                                                     |
| TS29RumUnc0053 CDS CDS | 1.0  | 63.0  | 0.1  | E | COG4992         | Ornithine/acetylornithine aminotransferase                                                                                                      |
| TS29Bif3640 CDS CDS    | 0.8  | 49.5  | 0.1  | E | COG0019         | Diaminopimelate decarboxylase                                                                                                                   |
| TS28Bif0858 CDS CDS    | 0.7  | 44.3  | 0.1  | E | COG0346         | Lactoylglutathione lyase and related lyases                                                                                                     |
| TS28Bif3788 CDS CDS    | 0.3  | 16.7  | 0.1  | E | COG4690         | Dipeptidase                                                                                                                                     |
| TS29Bif3982 CDS CDS    | 2.0  | 133.5 | 0.1  | E | COG0436 COG1168 | Aspartate/tyrosine/aromatic aminotransferase Bifunctional PLP-dependent enzyme with beta-cystathionase and maltose regulon repressor activities |
| TS29Bac05576 CDS CDS   | 0.3  | 22.3  | 0.1  | E | COG0591 COG4146 | Na+/proline symporter Predicted symporter                                                                                                       |
| Rtor2036 CDS CDS       | 0.6  | 40.5  | 0.1  | E | COG3340         | Pentidase E                                                                                                                                     |
| TS29Fae00433 CDS CDS   | 0.5  | 35.0  | 0.1  | E | COG4177         | ABC-type branched-chain amino acid transport system, permease component                                                                         |
| TS28Bif097 CDS CDS     | 0.3  | 18.0  | 0.1  | E | COG0006         | Xaa-Pro aminopeptidase                                                                                                                          |
| TS29Bif2494 CDS CDS    | 0.4  | 29.0  | 0.1  | E | COG1605 COG0077 | Chorismate mutase Prephenate dehydratase                                                                                                        |
| TS29Bif1333 CDS CDS    | 0.7  | 49.0  | 0.1  | E | COG0747 COG4166 | ABC-type dipeptide transport system, periplasmic component ABC-type oligonucleotide transport system, periplasmic component                     |
| TS29Bif1105 CDS CDS    | 1.0  | 75.0  | 0.1  | E | COG4690         | Dipeptidase                                                                                                                                     |
| TS28Bif201 CDS CDS     | 1.8  | 133.8 | 0.1  | E | COG0070         | Glutamate synthase domain 3                                                                                                                     |
| TS29Fae00851 CDS CDS   | 1.0  | 77.5  | 0.1  | E | COG0141         | Histidinol dehydrogenase                                                                                                                        |
| Robe3181 CDS CDS       | 0.2  | 15.5  | 0.1  | E | COG0334         | Glutamate dehydrogenase/leucine dehydrogenase                                                                                                   |
| Bnse0846 CDS CDS       | 0.1  | 7.9   | 0.1  | E | COG0174         | Glutamine synthetase                                                                                                                            |
| TS29Bac07802 CDS CDS   | 0.3  | 27.0  | 0.1  | E | COG1506         | Dipeptidyl aminonucleotidases/acylaminoacyl-peptidases                                                                                          |
| TS29Fae00077 CDS CDS   | 0.5  | 41.0  | 0.1  | E | COG2755         | Lysophospholipase L1 and related esterases                                                                                                      |
| TS28Bif2059 CDS CDS    | 0.4  | 30.9  | 0.1  | E | COG0460         | Homoserine dehydrogenase                                                                                                                        |
| TS29Bac07219 CDS CDS   | 0.3  | 27.8  | 0.1  | E | COG0531         | Amino acid transporters                                                                                                                         |
| TS29Fae03184 CDS CDS   | 1.0  | 86.5  | 0.1  | E | COG4690         | Dipeptidase                                                                                                                                     |
| TS29Fae00664 CDS CDS   | 0.3  | 30.0  | 0.1  | E | COG1115         | Na+/alanine symporter                                                                                                                           |
| Bpse1086 CDS CDS       | 0.3  | 22.7  | 0.1  | E | COG4690         | Dipeptidase                                                                                                                                     |
| TS29Bif1190 CDS CDS    | 0.3  | 22.7  | 0.1  | E | COG4690         | Dipeptidase                                                                                                                                     |
| TS29Bac09129 CDS CDS   | 0.2  | 18.3  | 0.0  | E | COG1506         | Dipeptidyl aminonucleotidases/acylaminoacyl-peptidases                                                                                          |
| TS29Fae08425 CDS CDS   | 0.2  | 18.5  | 0.0  | E | COG0141         | Histidinol dehydrogenase                                                                                                                        |
| TS29Rum15995 CDS CDS   | 0.5  | 46.5  | 0.0  | E | COG0687 COG1177 | Spermidine/putrescine-binding periplasmic protein ABC-type spermidine/putrescine transport system, permease component II                        |
| TS29Bif2257 CDS CDS    | 0.3  | 23.5  | 0.0  | E | COG0006         | Xaa-Pro aminopeptidase                                                                                                                          |
| TS28Bif2887 CDS CDS    | 0.1  | 9.4   | 0.0  | E | COG0174         | Glutamine synthetase                                                                                                                            |
| TS29Bac00843 CDS CDS   | 0.3  | 31.5  | 0.0  | E | COG0263         | Glutamate 5-kinase                                                                                                                              |
| TS29Bif1146 CDS CDS    | 0.3  | 31.5  | 0.0  | E | COG0136         | Aspartate-semialdehyde dehydrogenase                                                                                                            |
| TS28Eub4474 CDS CDS    | 0.3  | 32.5  | 0.0  | E | COG3340         | Pentidase E                                                                                                                                     |
| TS29Bif2919 CDS CDS    | 1.8  | 173.9 | 0.0  | E | COG0070         | Glutamate synthase domain 3                                                                                                                     |
| TS29Rum11664 CDS CDS   | 1.0  | 100.0 | 0.0  | E | COG0747         | ABC-type dipeptide transport system, periplasmic component                                                                                      |
| Cnex0637 CDS CDS       | 0.3  | 25.2  | 0.0  | E | COG3340         | Pentidase E                                                                                                                                     |
| TS29Fae03211 CDS CDS   | 0.7  | 69.5  | 0.0  | E | COG1982         | Arginine/lysine/ornithine decarboxylases                                                                                                        |
| TS29Bif2734 CDS CDS    | 1.0  | 106.5 | 0.0  | E | COG1114         | Branched-chain amino acid permeases                                                                                                             |
| TS28Fae01739 CDS CDS   | 0.5  | 55.0  | 0.0  | E | COG0710         | 3-dehydroquinate dehydratase                                                                                                                    |
| TS28Bif0199 CDS CDS    | 0.5  | 51.1  | 0.0  | E | COG0747 COG4166 | ABC-type dipeptide transport system, periplasmic component ABC-type oligonucleotide transport system, periplasmic component                     |
| TS28Fae18412 CDS CDS   | 0.5  | 58.0  | 0.0  | E | COG0527         | Aspartokinases                                                                                                                                  |
| TS28Bif4745 CDS CDS    | 0.3  | 29.0  | 0.0  | E | COG0137         | Argininosuccinate synthase                                                                                                                      |
| TS29Col0167 CDS CDS    | 0.5  | 58.5  | 0.0  | E | COG0498         | Threonine synthase                                                                                                                              |

|                      |      |       |      |       |                                                                                 |                                                                                                                                                                                                                                                                                                                                                                                                                                                                                                                                                                                                                                                                                                   |
|----------------------|------|-------|------|-------|---------------------------------------------------------------------------------|---------------------------------------------------------------------------------------------------------------------------------------------------------------------------------------------------------------------------------------------------------------------------------------------------------------------------------------------------------------------------------------------------------------------------------------------------------------------------------------------------------------------------------------------------------------------------------------------------------------------------------------------------------------------------------------------------|
| TS29Bif2462/CDS/CDS  | 0.8  | 88.3  | 0.0  | E     | COG0006                                                                         | Xaa-Pro aminopeptidase                                                                                                                                                                                                                                                                                                                                                                                                                                                                                                                                                                                                                                                                            |
| TS29Bif3864/CDS/CDS  | 0.3  | 29.6  | 0.0  | E     | COG1296                                                                         | Predicted branched-chain amino acid permease (azalucine resistance)                                                                                                                                                                                                                                                                                                                                                                                                                                                                                                                                                                                                                               |
| TS28Bif0738/CDS/CDS  | 0.3  | 29.6  | 0.0  | E     | COG1296                                                                         | Predicted branched-chain amino acid permease (azalucine resistance)                                                                                                                                                                                                                                                                                                                                                                                                                                                                                                                                                                                                                               |
| TS29Fae01113/CDS/CDS | 0.5  | 59.5  | 0.0  | E     | COG4166                                                                         | ABC-type oligopeptide transport system, periplasmic component                                                                                                                                                                                                                                                                                                                                                                                                                                                                                                                                                                                                                                     |
| TS29Bif2095/CDS/CDS  | 0.1  | 12.4  | 0.0  | E     | COG0174                                                                         | Glutamine synthetase                                                                                                                                                                                                                                                                                                                                                                                                                                                                                                                                                                                                                                                                              |
| TS29Fae08348/CDS/CDS | 0.5  | 64.5  | 0.0  | E     | COG0119                                                                         | Isopropylmalate/homocitrate/citramalate synthases                                                                                                                                                                                                                                                                                                                                                                                                                                                                                                                                                                                                                                                 |
| Dfor2604/CDS/CDS     | 0.1  | 18.5  | 0.0  | E     | COG2856                                                                         | Predicted Zn peptidase                                                                                                                                                                                                                                                                                                                                                                                                                                                                                                                                                                                                                                                                            |
| TS29Rum18693/CDS/CDS | 0.1  | 18.5  | 0.0  | E     | COG2856                                                                         | Predicted Zn peptidase                                                                                                                                                                                                                                                                                                                                                                                                                                                                                                                                                                                                                                                                            |
| TS29Bac06512/CDS/CDS | 0.1  | 16.3  | 0.0  | E     | COG0119                                                                         | Isopropylmalate/homocitrate/citramalate synthases                                                                                                                                                                                                                                                                                                                                                                                                                                                                                                                                                                                                                                                 |
| TS29Bif3356/CDS/CDS  | 0.8  | 101.3 | 0.0  | E     | COG0174                                                                         | Glutamine synthetase                                                                                                                                                                                                                                                                                                                                                                                                                                                                                                                                                                                                                                                                              |
| TS28Bif2005/CDS/CDS  | 0.3  | 37.2  | 0.0  | E     | COG0620                                                                         | Methionine synthase II (cobalamin-independent)                                                                                                                                                                                                                                                                                                                                                                                                                                                                                                                                                                                                                                                    |
| TS28Fae18783/CDS/CDS | 0.5  | 75.5  | 0.0  | E     | COG1775                                                                         | Benzoyl-CoA reductase/2-hydroxyglutaryl-CoA dehydratase subunit, BcrC/BadD/HgdB                                                                                                                                                                                                                                                                                                                                                                                                                                                                                                                                                                                                                   |
| TS28Fae21242/CDS/CDS | 0.3  | 38.0  | 0.0  | E     | COG4992                                                                         | Ornithine/acetvlornithine aminotransferase                                                                                                                                                                                                                                                                                                                                                                                                                                                                                                                                                                                                                                                        |
| TS28Bif1004/CDS/CDS  | 0.3  | 42.6  | 0.0  | E     | COG0747/COG4166/COG4533                                                         | ABC-type dipeptide transport system, periplasmic component ABC-type oligopeptide transport system, periplasmic component ABC-type uncharacterized transport system, periplasmic component                                                                                                                                                                                                                                                                                                                                                                                                                                                                                                         |
| TS28Bif4769/CDS/CDS  | 0.1  | 17.1  | 0.0  | E     | COG0174                                                                         | Glutamine synthetase                                                                                                                                                                                                                                                                                                                                                                                                                                                                                                                                                                                                                                                                              |
| TS29Bif0256/CDS/CDS  | 0.3  | 42.8  | 0.0  | E     | COG0019                                                                         | Diaminopimelate decarboxylase                                                                                                                                                                                                                                                                                                                                                                                                                                                                                                                                                                                                                                                                     |
| TS29Bif3641/CDS/CDS  | 0.4  | 68.4  | 0.0  | E     | COG0460                                                                         | Homoserine dehydrogenase                                                                                                                                                                                                                                                                                                                                                                                                                                                                                                                                                                                                                                                                          |
| TS29Rum20032/CDS/CDS | 1.0  | 183.0 | 0.0  | E     | COG0070                                                                         | Glutamate synthase domain 3                                                                                                                                                                                                                                                                                                                                                                                                                                                                                                                                                                                                                                                                       |
| TS29Bif3343/CDS/CDS  | 0.3  | 49.5  | 0.0  | E     | COG1364                                                                         | N-acetylglutamate synthase (N-acetylornithine aminotransferase)                                                                                                                                                                                                                                                                                                                                                                                                                                                                                                                                                                                                                                   |
| TS29Bif3642/CDS/CDS  | 0.3  | 50.0  | 0.0  | E     | COG0083                                                                         | Homoserine kinase                                                                                                                                                                                                                                                                                                                                                                                                                                                                                                                                                                                                                                                                                 |
| TS29Bif2917/CDS/CDS  | 0.5  | 92.0  | 0.0  | E     | COG0747/COG4166                                                                 | ABC-type dipeptide transport system, periplasmic component ABC-type oligopeptide transport system, periplasmic component                                                                                                                                                                                                                                                                                                                                                                                                                                                                                                                                                                          |
| TS29Bif3338/CDS/CDS  | 0.3  | 53.5  | 0.0  | E     | COG0137                                                                         | Argininosuccinate synthase                                                                                                                                                                                                                                                                                                                                                                                                                                                                                                                                                                                                                                                                        |
| TS29Bif3655/CDS/CDS  | 0.3  | 60.2  | 0.0  | E     | COG0436                                                                         | Aspartate/tyrosine/aromatic aminotransferase                                                                                                                                                                                                                                                                                                                                                                                                                                                                                                                                                                                                                                                      |
| TS29Bif3553/CDS/CDS  | 0.3  | 65.4  | 0.0  | E     | COG1113                                                                         | Gamma-aminobutyrate permease and related permeases                                                                                                                                                                                                                                                                                                                                                                                                                                                                                                                                                                                                                                                |
| TS29Bif3497/CDS/CDS  | 0.3  | 90.2  | 0.0  | E     | COG1305                                                                         | Transglutaminase-like enzymes, putative cysteine proteases                                                                                                                                                                                                                                                                                                                                                                                                                                                                                                                                                                                                                                        |
| TS28Bif4936/CDS/CDS  | 0.3  | 90.2  | 0.0  | E     | COG1305                                                                         | Transglutaminase-like enzymes, putative cysteine proteases                                                                                                                                                                                                                                                                                                                                                                                                                                                                                                                                                                                                                                        |
| TS29Bif2893/CDS/CDS  | 0.3  | 69.2  | 0.0  | E     | COG0620                                                                         | Methionine synthase II (cobalamin-independent)                                                                                                                                                                                                                                                                                                                                                                                                                                                                                                                                                                                                                                                    |
| TS29Bif0481/CDS/CDS  | 0.3  | 69.3  | 0.0  | E     | COG0334                                                                         | Glutamate dehydrogenase/leucine dehydrogenase                                                                                                                                                                                                                                                                                                                                                                                                                                                                                                                                                                                                                                                     |
| TS29Bif0983/CDS/CDS  | 0.2  | 46.8  | 0.0  | E     | COG0334                                                                         | Glutamate dehydrogenase/leucine dehydrogenase                                                                                                                                                                                                                                                                                                                                                                                                                                                                                                                                                                                                                                                     |
| TS28Bif4432/CDS/CDS  | 0.3  | 70.3  | 0.0  | E     | COG0334                                                                         | Glutamate dehydrogenase/leucine dehydrogenase                                                                                                                                                                                                                                                                                                                                                                                                                                                                                                                                                                                                                                                     |
| TS29Bif0708/CDS/CDS  | 0.3  | 75.6  | 0.0  | E     | COG0747/COG4166/COG4533                                                         | ABC-type dipeptide transport system, periplasmic component ABC-type oligopeptide transport system, periplasmic component ABC-type uncharacterized transport system, periplasmic component                                                                                                                                                                                                                                                                                                                                                                                                                                                                                                         |
| TS29Bif3342/CDS/CDS  | 0.3  | 78.5  | 0.0  | E     | COG0548/COG1364                                                                 | Acetylglutamate kinase N-acetylglutamate synthase (N-acetylornithine aminotransferase)                                                                                                                                                                                                                                                                                                                                                                                                                                                                                                                                                                                                            |
| TS28Bif2042/CDS/CDS  | 0.3  | 83.2  | 0.0  | E     | COG0436                                                                         | Aspartate/tyrosine/aromatic aminotransferase                                                                                                                                                                                                                                                                                                                                                                                                                                                                                                                                                                                                                                                      |
| TS29Bif3033/CDS/CDS  | 0.3  | 112.0 | 0.0  | E     | COG2873                                                                         | O-acetylhomoserine sulfhydrylase                                                                                                                                                                                                                                                                                                                                                                                                                                                                                                                                                                                                                                                                  |
| TS28Bif2177/CDS/CDS  | 0.3  | 113.4 | 0.0  | E     | COG1113                                                                         | Gamma-aminobutyrate permease and related permeases                                                                                                                                                                                                                                                                                                                                                                                                                                                                                                                                                                                                                                                |
| Acac1337/CDS/CDS     | 19.0 | 1.0   | 86.3 | E C   | COG1063/COG1064/COG1062                                                         | Threonine dehydrogenase and related Zn-dependent dehydrogenases Zn-dependent alcohol dehydrogenases Zn-dependent alcohol dehydrogenases, class III                                                                                                                                                                                                                                                                                                                                                                                                                                                                                                                                                |
| CspM6210670/CDS/CDS  | 4.0  | 1.0   | 18.2 | E C   | COG0473                                                                         | Isocitrate/isopropylmalate dehydrogenase                                                                                                                                                                                                                                                                                                                                                                                                                                                                                                                                                                                                                                                          |
| TS28Fae20772/CDS/CDS | 22.5 | 6.0   | 17.0 | E C   | COG1252/COG0709                                                                 | NADH dehydrogenase, FAD-containing subunit Selenophosphate synthase                                                                                                                                                                                                                                                                                                                                                                                                                                                                                                                                                                                                                               |
| Dfor0576/CDS/CDS     | 3.0  | 1.0   | 13.6 | E C   | COG0473                                                                         | Isocitrate/isopropylmalate dehydrogenase                                                                                                                                                                                                                                                                                                                                                                                                                                                                                                                                                                                                                                                          |
| TS28Rum12958/CDS/CDS | 3.0  | 1.0   | 13.6 | E C   | COG1063/COG1062                                                                 | Threonine dehydrogenase and related Zn-dependent dehydrogenases Zn-dependent alcohol dehydrogenases, class III                                                                                                                                                                                                                                                                                                                                                                                                                                                                                                                                                                                    |
| Bfin3168/CDS/CDS     | 3.0  | 1.0   | 13.5 | E C   | COG0473                                                                         | Isocitrate/isopropylmalate dehydrogenase                                                                                                                                                                                                                                                                                                                                                                                                                                                                                                                                                                                                                                                          |
| TS28Eub6200/CDS/CDS  | 4.0  | 1.5   | 12.1 | E C   | COG0065/COG1048                                                                 | 3-isopropylmalate dehydratase large subunit Aconitase A                                                                                                                                                                                                                                                                                                                                                                                                                                                                                                                                                                                                                                           |
| TS28Rum13906/CDS/CDS | 13.3 | 5.5   | 10.9 | E C   | COG0065/COG1048                                                                 | 3-isopropylmalate dehydratase large subunit Aconitase A                                                                                                                                                                                                                                                                                                                                                                                                                                                                                                                                                                                                                                           |
| TS28Fae20375/CDS/CDS | 1.0  | 53.0  | 0.1  | E C   | COG0065/COG1048                                                                 | 3-isopropylmalate dehydratase large subunit Aconitase A                                                                                                                                                                                                                                                                                                                                                                                                                                                                                                                                                                                                                                           |
| TS29Fae04274/CDS/CDS | 1.0  | 59.0  | 0.1  | E C   | COG0578/COG0579/COG0665                                                         | Glycerol-3-phosphate dehydrogenase Predicted dehydrogenase Glycine/D-amino acid oxidases (deaminating)                                                                                                                                                                                                                                                                                                                                                                                                                                                                                                                                                                                            |
| TS29Bif0808/CDS/CDS  | 0.6  | 59.6  | 0.0  | E C   | COG1027/COG0114                                                                 | Aspartate ammonia-lyase Fumarase                                                                                                                                                                                                                                                                                                                                                                                                                                                                                                                                                                                                                                                                  |
| TS29C011392/CDS/CDS  | 0.5  | 60.0  | 0.0  | E C   | COG0065/COG1048                                                                 | 3-isopropylmalate dehydratase large subunit Aconitase A                                                                                                                                                                                                                                                                                                                                                                                                                                                                                                                                                                                                                                           |
| TS28Bif0478/CDS/CDS  | 0.6  | 75.1  | 0.0  | E C   | COG1027/COG0114                                                                 | Aspartate ammonia-lyase Fumarase                                                                                                                                                                                                                                                                                                                                                                                                                                                                                                                                                                                                                                                                  |
| TS29Dor0636/CDS/CDS  | 74.0 | 8.0   | 42.0 | E C H | COG1148/COG4624/COG0493/COG0543/COG1034/COG1142/COG1894/COG1144                 | Heterodisulfide reductase, subunit A and related polyferredoxins Iron only hydrogenase large subunit, C-terminal domain NADPH-dependent glutamate synthase beta chain and related oxidoreductases 2-polyprenylphenol hydroxylase and related flavodoxin oxidoreductases NADH dehydrogenase/NADH:ubiquinone oxidoreductase 75 kD subunit (chain G) Fe-S-cluster-containing hydrogenase components 2 NADH:ubiquinone oxidoreductase, NADH-binding (51 kD) subunit Pyruvate:ferredoxin oxidoreductase and related 2-oxoacid:ferredoxin oxidoreductases, delta subunit                                                                                                                                |
| TS28Rum13304/CDS/CDS | 33.0 | 7.5   | 20.0 | E C H | COG1148/COG4624/COG0493/COG0543/COG1034/COG1894/COG1145/COG1143/COG1144/COG1319 | Heterodisulfide reductase, subunit A and related polyferredoxins Iron only hydrogenase large subunit, C-terminal domain NADPH-dependent glutamate synthase beta chain and related oxidoreductases 2-polyprenylphenol hydroxylase and related flavodoxin oxidoreductases NADH dehydrogenase/NADH:ubiquinone oxidoreductase 75 kD subunit (chain G) NADH:ubiquinone oxidoreductase, NADH-binding (51 kD) subunit Ferredoxin Formate hydrogenlyase subunit 6 NADH:ubiquinone oxidoreductase 23 kD subunit (chain I) Pyruvate:ferredoxin oxidoreductase and related 2-oxoacid:ferredoxin oxidoreductases, delta subunit Aerobic-type carbon monoxide dehydrogenase, middle subunit CoxM/CutM homologs |
| TS29Bif0562/CDS/CDS  | 1.3  | 63.8  | 0.1  | E C H | COG0493/COG0543/COG1034/COG1142/COG1894/COG1146                                 | NADPH-dependent glutamate synthase beta chain and related oxidoreductases 2-polyprenylphenol hydroxylase and related flavodoxin oxidoreductases NADH dehydrogenase/NADH:ubiquinone oxidoreductase 75 kD subunit (chain G) Fe-S-cluster-containing hydrogenase components 2 NADH:ubiquinone oxidoreductase, NADH-binding (51 kD) subunit Ferredoxin                                                                                                                                                                                                                                                                                                                                                |
| TS28Bif1219/CDS/CDS  | 1.3  | 63.8  | 0.1  | E C H | COG0493/COG0543/COG1034/COG1142/COG1894/COG1146                                 | NADPH-dependent glutamate synthase beta chain and related oxidoreductases 2-polyprenylphenol hydroxylase and related flavodoxin oxidoreductases NADH dehydrogenase/NADH:ubiquinone oxidoreductase 75 kD subunit (chain G) Fe-S-cluster-containing hydrogenase components 2 NADH:ubiquinone oxidoreductase, NADH-binding (51 kD) subunit Ferredoxin                                                                                                                                                                                                                                                                                                                                                |

|                      |     |       |      |           |                                                                                                                                                         |                                                                                                                                                                                                                                                                                                                                                                                                                                                                                                                                                                                                                                                                                                                                                                                                                                                                                                                                                                                                                                                                                                                                             |
|----------------------|-----|-------|------|-----------|---------------------------------------------------------------------------------------------------------------------------------------------------------|---------------------------------------------------------------------------------------------------------------------------------------------------------------------------------------------------------------------------------------------------------------------------------------------------------------------------------------------------------------------------------------------------------------------------------------------------------------------------------------------------------------------------------------------------------------------------------------------------------------------------------------------------------------------------------------------------------------------------------------------------------------------------------------------------------------------------------------------------------------------------------------------------------------------------------------------------------------------------------------------------------------------------------------------------------------------------------------------------------------------------------------------|
| TS29Fae09240 CDS CDS | 0.3 | 17.0  | 0.1  | E C H     | COG4624 COG0493 COG0543 COG1034 COG1142 COG1894                                                                                                         | Iron only hydrogenase large subunit, C-terminal domain NADPH-dependent glutamate synthase beta chain and related oxidoreductases 2-polyprenylphenol hydroxylase and related flavodoxin oxidoreductases NADH dehydrogenase/NADH:ubiquinone oxidoreductase 75 kD subunit (chain G) Fe-S-cluster-containing hydrogenase components 2 NADH:ubiquinone oxidoreductase, NADH-binding (51 kD) subunit                                                                                                                                                                                                                                                                                                                                                                                                                                                                                                                                                                                                                                                                                                                                              |
| TS29Fae03160 CDS CDS | 1.0 | 87.5  | 0.1  | E C H     | COG4624 COG0493 COG0543 COG1034 COG1142 COG1894                                                                                                         | Iron only hydrogenase large subunit, C-terminal domain NADPH-dependent glutamate synthase beta chain and related oxidoreductases 2-polyprenylphenol hydroxylase and related flavodoxin oxidoreductases NADH dehydrogenase/NADH:ubiquinone oxidoreductase 75 kD subunit (chain G) Fe-S-cluster-containing hydrogenase components 2 NADH:ubiquinone oxidoreductase, NADH-binding (51 kD) subunit                                                                                                                                                                                                                                                                                                                                                                                                                                                                                                                                                                                                                                                                                                                                              |
| TS29Clo2732 CDS CDS  | 5.0 | 1.0   | 22.7 | E F       | COG0462                                                                                                                                                 | Phosphoribosylpyrophosphate synthetase                                                                                                                                                                                                                                                                                                                                                                                                                                                                                                                                                                                                                                                                                                                                                                                                                                                                                                                                                                                                                                                                                                      |
| Bova0252 CDS CDS     | 7.0 | 2.0   | 15.8 | E F       | COG0458                                                                                                                                                 | Carbamoylphosphate synthase large subunit (split gene in MJ)                                                                                                                                                                                                                                                                                                                                                                                                                                                                                                                                                                                                                                                                                                                                                                                                                                                                                                                                                                                                                                                                                |
| Dlon0288 CDS CDS     | 1.5 | 0.5   | 13.6 | E F       | COG0462                                                                                                                                                 | Phosphoribosylpyrophosphate synthetase                                                                                                                                                                                                                                                                                                                                                                                                                                                                                                                                                                                                                                                                                                                                                                                                                                                                                                                                                                                                                                                                                                      |
| TS29Rum06710 CDS CDS | 3.0 | 1.0   | 13.6 | E F       | COG0458                                                                                                                                                 | Carbamoylphosphate synthase large subunit (split gene in MJ)                                                                                                                                                                                                                                                                                                                                                                                                                                                                                                                                                                                                                                                                                                                                                                                                                                                                                                                                                                                                                                                                                |
| Buni2883 CDS CDS     | 4.3 | 1.5   | 13.1 | E F       | COG0283 COG0128 COG0287                                                                                                                                 | Cytidylate kinase 5-enolpyruvylshikimate-3-phosphate synthase Prephenate dehydrogenase                                                                                                                                                                                                                                                                                                                                                                                                                                                                                                                                                                                                                                                                                                                                                                                                                                                                                                                                                                                                                                                      |
| Bnse0389 CDS CDS     | 0.3 | 19.0  | 0.1  | E F       | COG0458                                                                                                                                                 | Carbamoylphosphate synthase large subunit (split gene in MJ)                                                                                                                                                                                                                                                                                                                                                                                                                                                                                                                                                                                                                                                                                                                                                                                                                                                                                                                                                                                                                                                                                |
| TS28Fae18950 CDS CDS | 0.3 | 23.0  | 0.1  | E F       | COG0505                                                                                                                                                 | Carbamoylphosphate synthase small subunit                                                                                                                                                                                                                                                                                                                                                                                                                                                                                                                                                                                                                                                                                                                                                                                                                                                                                                                                                                                                                                                                                                   |
| TS29Bif4095 CDS CDS  | 2.9 | 206.4 | 0.1  | E F       | COG0458                                                                                                                                                 | Carbamoylphosphate synthase large subunit (split gene in MJ)                                                                                                                                                                                                                                                                                                                                                                                                                                                                                                                                                                                                                                                                                                                                                                                                                                                                                                                                                                                                                                                                                |
| TS29Fae08614 CDS CDS | 1.0 | 82.5  | 0.1  | E F       | COG0505                                                                                                                                                 | Carbamoylphosphate synthase small subunit                                                                                                                                                                                                                                                                                                                                                                                                                                                                                                                                                                                                                                                                                                                                                                                                                                                                                                                                                                                                                                                                                                   |
| TS28Bif4271 CDS CDS  | 0.3 | 29.5  | 0.1  | E F       | COG0458                                                                                                                                                 | Carbamoylphosphate synthase large subunit (split gene in MJ)                                                                                                                                                                                                                                                                                                                                                                                                                                                                                                                                                                                                                                                                                                                                                                                                                                                                                                                                                                                                                                                                                |
| TS29Bif0682 CDS CDS  | 0.3 | 31.8  | 0.0  | E F       | COG0462                                                                                                                                                 | Phosphoribosylpyrophosphate synthetase                                                                                                                                                                                                                                                                                                                                                                                                                                                                                                                                                                                                                                                                                                                                                                                                                                                                                                                                                                                                                                                                                                      |
| TS28Bif5326 CDS CDS  | 0.3 | 43.3  | 0.0  | E F       | COG0462                                                                                                                                                 | Phosphoribosylpyrophosphate synthetase                                                                                                                                                                                                                                                                                                                                                                                                                                                                                                                                                                                                                                                                                                                                                                                                                                                                                                                                                                                                                                                                                                      |
| TS29Bif1622 CDS CDS  | 0.3 | 58.5  | 0.0  | E F       | COG0458                                                                                                                                                 | Carbamoylphosphate synthase large subunit (split gene in MJ)                                                                                                                                                                                                                                                                                                                                                                                                                                                                                                                                                                                                                                                                                                                                                                                                                                                                                                                                                                                                                                                                                |
| TS28Bif1907 CDS CDS  | 0.3 | 15.0  | 0.1  | E F P     | COG0601 COG0503                                                                                                                                         | ABC-type dipeptide/oligopeptide/nickel transport systems, permease components Adenine/guanine phosphoribosyltransferases and related PRPP-binding proteins                                                                                                                                                                                                                                                                                                                                                                                                                                                                                                                                                                                                                                                                                                                                                                                                                                                                                                                                                                                  |
| TS29Bif2804 CDS CDS  | 0.3 | 15.0  | 0.1  | E F P     | COG0601 COG0503                                                                                                                                         | ABC-type dipeptide/oligopeptide/nickel transport systems, permease components Adenine/guanine phosphoribosyltransferases and related PRPP-binding proteins                                                                                                                                                                                                                                                                                                                                                                                                                                                                                                                                                                                                                                                                                                                                                                                                                                                                                                                                                                                  |
| TS29Fae09059 CDS CDS | 5.3 | 1.0   | 23.8 | E G       | COG2190 COG2008                                                                                                                                         | Phosphotransferase system IIA components Threonine aldolase                                                                                                                                                                                                                                                                                                                                                                                                                                                                                                                                                                                                                                                                                                                                                                                                                                                                                                                                                                                                                                                                                 |
| TS28Clo06242 CDS CDS | 5.0 | 1.0   | 22.7 | E G       | COG0129                                                                                                                                                 | Dihydroxyacid dehydratase/phosphogluconate dehydratase                                                                                                                                                                                                                                                                                                                                                                                                                                                                                                                                                                                                                                                                                                                                                                                                                                                                                                                                                                                                                                                                                      |
| TS28Rum10836 CDS CDS | 2.7 | 0.8   | 14.5 | E G       | COG0129                                                                                                                                                 | Dihydroxyacid dehydratase/phosphogluconate dehydratase                                                                                                                                                                                                                                                                                                                                                                                                                                                                                                                                                                                                                                                                                                                                                                                                                                                                                                                                                                                                                                                                                      |
| Chol2052 CDS CDS     | 7.0 | 3.0   | 10.6 | E G       | COG3842 COG3839                                                                                                                                         | ABC-type spermidine/putrescine transport systems, ATPase components ABC-type sugar transport systems, ATPase components                                                                                                                                                                                                                                                                                                                                                                                                                                                                                                                                                                                                                                                                                                                                                                                                                                                                                                                                                                                                                     |
| ShigspD90225 CDS CDS | 2.3 | 1.0   | 10.6 | E G       | COG0129 COG0676                                                                                                                                         | Dihydroxyacid dehydratase/phosphogluconate dehydratase Uncharacterized enzymes related to aldose 1-epimerase                                                                                                                                                                                                                                                                                                                                                                                                                                                                                                                                                                                                                                                                                                                                                                                                                                                                                                                                                                                                                                |
| TS29Fae06074 CDS CDS | 3.0 | 142.0 | 0.1  | E G       | COG0129 COG0676                                                                                                                                         | Dihydroxyacid dehydratase/phosphogluconate dehydratase Uncharacterized enzymes related to aldose 1-epimerase                                                                                                                                                                                                                                                                                                                                                                                                                                                                                                                                                                                                                                                                                                                                                                                                                                                                                                                                                                                                                                |
| TS29Bif3992 CDS CDS  | 1.8 | 83.8  | 0.1  | E G       | COG0129 COG0676                                                                                                                                         | Dihydroxyacid dehydratase/phosphogluconate dehydratase Uncharacterized enzymes related to aldose 1-epimerase                                                                                                                                                                                                                                                                                                                                                                                                                                                                                                                                                                                                                                                                                                                                                                                                                                                                                                                                                                                                                                |
| FpraM2120170 CDS CDS | 0.3 | 16.5  | 0.1  | E G       | COG2610                                                                                                                                                 | H <sup>+</sup> /gluconate symporter and related permeases                                                                                                                                                                                                                                                                                                                                                                                                                                                                                                                                                                                                                                                                                                                                                                                                                                                                                                                                                                                                                                                                                   |
| TS28Bif3344 CDS CDS  | 0.5 | 30.5  | 0.1  | E G       | COG0697                                                                                                                                                 | Permeases of the drug/metabolite transporter (DMT) superfamily                                                                                                                                                                                                                                                                                                                                                                                                                                                                                                                                                                                                                                                                                                                                                                                                                                                                                                                                                                                                                                                                              |
| TS29Bif2518 CDS CDS  | 0.5 | 75.0  | 0.0  | E G       | COG0697                                                                                                                                                 | Permeases of the drug/metabolite transporter (DMT) superfamily                                                                                                                                                                                                                                                                                                                                                                                                                                                                                                                                                                                                                                                                                                                                                                                                                                                                                                                                                                                                                                                                              |
| TS29Bac09681 CDS CDS | 0.3 | 23.7  | 0.1  | E G K T   | COG0642 COG5002 COG2202 COG0834 COG0745 COG4753 COG2770 COG0784 COG2198 COG3322 COG3292 COG2972 COG5001 COG3706 COG4251 COG1879 COG2114 COG3447         | Signal transduction histidine kinase Signal transduction histidine kinase FOG: PAS/PAC domain ABC-type amino acid transport/signal transduction systems, periplasmic component/domain Response regulators consisting of a CheY-like receiver domain and a winged-helix DNA-binding domain Response regulator containing CheY-like receiver domain and AraC-type DNA-binding domain FOG: HAMP domain FOG: CheY-like receiver FOG: HPr domain Predicted periplasmic ligand-binding sensor domain Predicted periplasmic ligand-binding sensor domain Predicted signal transduction protein with a C-terminal ATPase domain Predicted signal transduction protein containing a membrane domain, an EAL and a GGDEF domain Response regulator containing a CheY-like receiver domain and a GGDEF domain Bacteriophytochrome (light-regulated signal transduction histidine kinase) ABC-type sugar transport system, periplasmic component Adenylylate cyclase, family 3 (some proteins contain HAMP domain) Predicted integral membrane sensor domain                                                                                            |
| TS29Bac12244 CDS CDS | 0.3 | 54.5  | 0.0  | E G N K T | COG0642 COG5002 COG2202 COG0834 COG0745 COG4753 COG2207 COG2770 COG0784 COG5278 COG3322 COG3292 COG2972 COG5001 COG3706 COG4251 COG1879 COG2114 COG2201 | Signal transduction histidine kinase Signal transduction histidine kinase FOG: PAS/PAC domain ABC-type amino acid transport/signal transduction systems, periplasmic component/domain Response regulators consisting of a CheY-like receiver domain and a winged-helix DNA-binding domain Response regulator containing CheY-like receiver domain and AraC-type DNA-binding domain AraC-type DNA-binding domain-containing proteins FOG: HAMP domain FOG: CheY-like receiver Predicted periplasmic ligand-binding sensor domain Predicted periplasmic ligand-binding sensor domain Predicted signal transduction protein with a C-terminal ATPase domain Predicted signal transduction protein containing a membrane domain, an EAL and a GGDEF domain Response regulator containing a CheY-like receiver domain and a GGDEF domain Bacteriophytochrome (light-regulated signal transduction histidine kinase) ABC-type sugar transport system, periplasmic component Adenylylate cyclase, family 3 (some proteins contain HAMP domain) Chemotaxis response regulator containing a CheY-like receiver domain and a methyltransferase domain |
| TS28Dor0653 CDS CDS  | 6.0 | 1.0   | 27.2 | E G P     | COG0477                                                                                                                                                 | Permeases of the major facilitator superfamily                                                                                                                                                                                                                                                                                                                                                                                                                                                                                                                                                                                                                                                                                                                                                                                                                                                                                                                                                                                                                                                                                              |
| TS28Rum12730 CDS CDS | 5.0 | 2.0   | 11.3 | E G P     | COG3842 COG3839 COG1118 COG4149 COG4148                                                                                                                 | ABC-type spermidine/putrescine transport systems, ATPase components ABC-type sugar transport systems, ATPase components ABC-type sulfate/molybdate transport systems, ATPase component ABC-type molybdate transport system, permease component ABC-type molybdate transport system, ATPase component                                                                                                                                                                                                                                                                                                                                                                                                                                                                                                                                                                                                                                                                                                                                                                                                                                        |
| TS29Bac10282 CDS CDS | 3.3 | 1.5   | 10.1 | E G P     | COG0477                                                                                                                                                 | Permeases of the major facilitator superfamily                                                                                                                                                                                                                                                                                                                                                                                                                                                                                                                                                                                                                                                                                                                                                                                                                                                                                                                                                                                                                                                                                              |
| TS29Bif1708 CDS CDS  | 0.7 | 47.0  | 0.1  | E G P     | COG0477                                                                                                                                                 | Permeases of the major facilitator superfamily                                                                                                                                                                                                                                                                                                                                                                                                                                                                                                                                                                                                                                                                                                                                                                                                                                                                                                                                                                                                                                                                                              |
| TS29Bac10582 CDS CDS | 0.3 | 24.0  | 0.1  | E G P     | COG0477                                                                                                                                                 | Permeases of the major facilitator superfamily                                                                                                                                                                                                                                                                                                                                                                                                                                                                                                                                                                                                                                                                                                                                                                                                                                                                                                                                                                                                                                                                                              |
| TS29Bif3824 CDS CDS  | 0.8 | 70.4  | 0.1  | E G P     | COG0477                                                                                                                                                 | Permeases of the major facilitator superfamily                                                                                                                                                                                                                                                                                                                                                                                                                                                                                                                                                                                                                                                                                                                                                                                                                                                                                                                                                                                                                                                                                              |
| TS28Bif0781 CDS CDS  | 0.8 | 70.4  | 0.1  | E G P     | COG0477                                                                                                                                                 | Permeases of the major facilitator superfamily                                                                                                                                                                                                                                                                                                                                                                                                                                                                                                                                                                                                                                                                                                                                                                                                                                                                                                                                                                                                                                                                                              |
| TS28Bif5009 CDS CDS  | 0.3 | 33.8  | 0.0  | E G P     | COG0477                                                                                                                                                 | Permeases of the major facilitator superfamily                                                                                                                                                                                                                                                                                                                                                                                                                                                                                                                                                                                                                                                                                                                                                                                                                                                                                                                                                                                                                                                                                              |
| TS29Bif3012 CDS CDS  | 0.7 | 156.0 | 0.0  | E G P     | COG0477                                                                                                                                                 | Permeases of the major facilitator superfamily                                                                                                                                                                                                                                                                                                                                                                                                                                                                                                                                                                                                                                                                                                                                                                                                                                                                                                                                                                                                                                                                                              |
| TS29Bif5011 CDS CDS  | 0.5 | 123.3 | 0.0  | E G P     | COG0477                                                                                                                                                 | Permeases of the major facilitator superfamily                                                                                                                                                                                                                                                                                                                                                                                                                                                                                                                                                                                                                                                                                                                                                                                                                                                                                                                                                                                                                                                                                              |
| TS29Bif4135 CDS CDS  | 0.3 | 66.8  | 0.0  | E G P     | COG0477                                                                                                                                                 | Permeases of the major facilitator superfamily                                                                                                                                                                                                                                                                                                                                                                                                                                                                                                                                                                                                                                                                                                                                                                                                                                                                                                                                                                                                                                                                                              |

|                        |      |       |       |           |                                                                                 |                                                                                                                                                                                                                                                                                                                                                                                                                                                                                                                                                                                                                                                             |
|------------------------|------|-------|-------|-----------|---------------------------------------------------------------------------------|-------------------------------------------------------------------------------------------------------------------------------------------------------------------------------------------------------------------------------------------------------------------------------------------------------------------------------------------------------------------------------------------------------------------------------------------------------------------------------------------------------------------------------------------------------------------------------------------------------------------------------------------------------------|
| Msmi741008 CDS CDS     | 8.1  | 1.5   | 24.5  | E G U     | COG2730 COG3291 COG5563 COG3210 COG1305                                         | Endoglucanase FOG: PKD repeat Predicted integral membrane proteins containing uncharacterized repeats Large exoproteins involved in heme utilization or adhesion Transglutaminase-like enzymes, putative cysteine proteases                                                                                                                                                                                                                                                                                                                                                                                                                                 |
| TS28Met1041 CDS CDS    | 12.8 | 4.8   | 12.1  | E G U     | COG3210 COG1305 COG2730 COG3291 COG5563                                         | Large exoproteins involved in heme utilization or adhesion Transglutaminase-like enzymes, putative cysteine proteases Endoglucanase FOG: PKD repeat Predicted integral membrane proteins containing uncharacterized repeats                                                                                                                                                                                                                                                                                                                                                                                                                                 |
| TS29Bac10848 CDS CDS   | 0.5  | 27.0  | 0.1   | E G V     | COG2755 COG1680 COG1472                                                         | Lysophospholipase L1 and related esterases Beta-lactamase class C and other penicillin binding proteins Beta-glucosidase-related glycosidases                                                                                                                                                                                                                                                                                                                                                                                                                                                                                                               |
| Aput0330 CDS CDS       | 27.0 | 1.0   | 122.6 | E H       | COG0111                                                                         | Phosphoglycerate dehydrogenase and related dehydrogenases                                                                                                                                                                                                                                                                                                                                                                                                                                                                                                                                                                                                   |
| BactD13411 CDS CDS     | 1.3  | 0.2   | 34.0  | E H       | COG1932                                                                         | Phosphoserine aminotransferase                                                                                                                                                                                                                                                                                                                                                                                                                                                                                                                                                                                                                              |
| Bxyl1468 CDS CDS       | 2.7  | 0.5   | 24.2  | E H       | COG0175                                                                         | 3'-phosphoadenosine 5'-phosphosulfate sulfotransferase (PAPS reductase)/FAD synthetase and related enzymes                                                                                                                                                                                                                                                                                                                                                                                                                                                                                                                                                  |
| TS28Rum03611 CDS CDS   | 20.0 | 4.0   | 22.7  | E H       | COG0028                                                                         | Thiamine pyrophosphate-requiring enzymes [acetolactate synthase, pyruvate dehydrogenase (cytochrome), glyoxylate carboligase, phosphonopyruvate decarboxylase]                                                                                                                                                                                                                                                                                                                                                                                                                                                                                              |
| TS28Col1472 CDS CDS    | 5.0  | 1.0   | 22.7  | E H       | COG0115                                                                         | Branched-chain amino acid aminotransferase/4-amino-4-deoxychorismate lyase                                                                                                                                                                                                                                                                                                                                                                                                                                                                                                                                                                                  |
| Bxyl2769 CDS CDS       | 1.3  | 0.3   | 18.2  | E H       | COG0115                                                                         | Branched-chain amino acid aminotransferase/4-amino-4-deoxychorismate lyase                                                                                                                                                                                                                                                                                                                                                                                                                                                                                                                                                                                  |
| Dlon2364 CDS CDS       | 2.0  | 0.5   | 18.2  | E H       | COG1932                                                                         | Phosphoserine aminotransferase                                                                                                                                                                                                                                                                                                                                                                                                                                                                                                                                                                                                                              |
| TS28Col0576 CDS CDS    | 4.0  | 1.0   | 18.2  | E H       | COG1932                                                                         | Phosphoserine aminotransferase                                                                                                                                                                                                                                                                                                                                                                                                                                                                                                                                                                                                                              |
| Aput1837 CDS CDS       | 4.0  | 1.0   | 18.2  | E H       | COG0115                                                                         | Branched-chain amino acid aminotransferase/4-amino-4-deoxychorismate lyase                                                                                                                                                                                                                                                                                                                                                                                                                                                                                                                                                                                  |
| Dlon1801 CDS CDS       | 2.0  | 0.5   | 18.2  | E H       | COG0115                                                                         | Branched-chain amino acid aminotransferase/4-amino-4-deoxychorismate lyase                                                                                                                                                                                                                                                                                                                                                                                                                                                                                                                                                                                  |
| TS28Bac6149 CDS CDS    | 1.2  | 0.3   | 16.3  | E H       | COG0059                                                                         | Ketol-acid reductoisomerase                                                                                                                                                                                                                                                                                                                                                                                                                                                                                                                                                                                                                                 |
| Bum1293 CDS CDS        | 1.2  | 0.3   | 16.3  | E H       | COG0059                                                                         | Ketol-acid reductoisomerase                                                                                                                                                                                                                                                                                                                                                                                                                                                                                                                                                                                                                                 |
| TS28Rum14812 CDS CDS   | 5.0  | 1.5   | 15.1  | E H       | COG0111 COG1760                                                                 | Phosphoglycerate dehydrogenase and related dehydrogenases L-serine deaminase                                                                                                                                                                                                                                                                                                                                                                                                                                                                                                                                                                                |
| Acae1383 CDS CDS       | 3.2  | 1.0   | 14.4  | E H       | COG0059                                                                         | Ketol-acid reductoisomerase                                                                                                                                                                                                                                                                                                                                                                                                                                                                                                                                                                                                                                 |
| BactD11026 CDS CDS     | 3.0  | 1.0   | 13.6  | E H       | COG0028                                                                         | Thiamine pyrophosphate-requiring enzymes [acetolactate synthase, pyruvate dehydrogenase (cytochrome), glyoxylate carboligase, phosphonopyruvate decarboxylase]                                                                                                                                                                                                                                                                                                                                                                                                                                                                                              |
| TS28Fae16928 CDS CDS   | 1.5  | 0.5   | 13.6  | E H       | COG1932                                                                         | Phosphoserine aminotransferase                                                                                                                                                                                                                                                                                                                                                                                                                                                                                                                                                                                                                              |
| ShigspD91018 CDS CDS   | 1.5  | 0.5   | 13.6  | E H       | COG0028 COG3960                                                                 | Thiamine pyrophosphate-requiring enzymes [acetolactate synthase, pyruvate dehydrogenase (cytochrome), glyoxylate carboligase, phosphonopyruvate decarboxylase] Glyoxylate carboligase                                                                                                                                                                                                                                                                                                                                                                                                                                                                       |
| BactD23903 CDS CDS     | 1.5  | 0.5   | 13.6  | E H       | COG0028 COG1165                                                                 | Thiamine pyrophosphate-requiring enzymes [acetolactate synthase, pyruvate dehydrogenase (cytochrome), glyoxylate carboligase, phosphonopyruvate decarboxylase] 2-succinyl-6-hydroxy-2,4-cyclohexadiene-1-carboxylate synthase                                                                                                                                                                                                                                                                                                                                                                                                                               |
| Ceut0171 CDS CDS       | 1.5  | 0.5   | 13.6  | E H       | COG0059                                                                         | Ketol-acid reductoisomerase                                                                                                                                                                                                                                                                                                                                                                                                                                                                                                                                                                                                                                 |
| TS28Col08016 CDS CDS   | 5.5  | 2.0   | 12.5  | E H       | COG0059                                                                         | Ketol-acid reductoisomerase                                                                                                                                                                                                                                                                                                                                                                                                                                                                                                                                                                                                                                 |
| BactD11906 CDS CDS     | 4.9  | 2.0   | 11.0  | E H       | COG0028                                                                         | Thiamine pyrophosphate-requiring enzymes [acetolactate synthase, pyruvate dehydrogenase (cytochrome), glyoxylate carboligase, phosphonopyruvate decarboxylase]                                                                                                                                                                                                                                                                                                                                                                                                                                                                                              |
| Bum12385 CDS CDS       | 5.7  | 2.5   | 10.3  | E H       | COG0115                                                                         | Branched-chain amino acid aminotransferase/4-amino-4-deoxychorismate lyase                                                                                                                                                                                                                                                                                                                                                                                                                                                                                                                                                                                  |
| TS28Fae18673 CDS CDS   | 0.5  | 29.5  | 0.1   | E H       | COG0028                                                                         | Thiamine pyrophosphate-requiring enzymes [acetolactate synthase, pyruvate dehydrogenase (cytochrome), glyoxylate carboligase, phosphonopyruvate decarboxylase]                                                                                                                                                                                                                                                                                                                                                                                                                                                                                              |
| TS29RumUnc0266 CDS CDS | 1.0  | 64.0  | 0.1   | E H       | COG0175                                                                         | 3'-phosphoadenosine 5'-phosphosulfate sulfotransferase (PAPS reductase)/FAD synthetase and related enzymes                                                                                                                                                                                                                                                                                                                                                                                                                                                                                                                                                  |
| TS28Fae20464 CDS CDS   | 0.3  | 29.5  | 0.1   | E H       | COG0059                                                                         | Ketol-acid reductoisomerase                                                                                                                                                                                                                                                                                                                                                                                                                                                                                                                                                                                                                                 |
| TS29Bif0489 CDS CDS    | 1.3  | 120.5 | 0.1   | E H       | COG0161 COG4992 COG0160                                                         | Adenosylmethionine-8-amino-7-oxononanoate aminotransferase Ornithine/acetylmethionine aminotransferase 4-aminobutyrate aminotransferase and related aminotransferases                                                                                                                                                                                                                                                                                                                                                                                                                                                                                       |
| TS29Fae08210 CDS CDS   | 0.5  | 84.0  | 0.0   | E H       | COG1932                                                                         | Phosphoserine aminotransferase                                                                                                                                                                                                                                                                                                                                                                                                                                                                                                                                                                                                                              |
| TS29Fae08234 CDS CDS   | 0.5  | 94.5  | 0.0   | E H       | COG0028                                                                         | Thiamine pyrophosphate-requiring enzymes [acetolactate synthase, pyruvate dehydrogenase (cytochrome), glyoxylate carboligase, phosphonopyruvate decarboxylase]                                                                                                                                                                                                                                                                                                                                                                                                                                                                                              |
| Chol2801 CDS CDS       | 12.0 | 4.0   | 13.6  | E H C     | COG1894 COG4624 COG1034 COG1145 COG0493 COG1142 COG0543 COG1148 COG1319 COG1144 | NADH:ubiquinone oxidoreductase, NADH-binding (51 kD) subunit Iron only hydrogenase large subunit, C-terminal domain NADH dehydrogenase/NADH:ubiquinone oxidoreductase 75 kD subunit (chain G) Ferredoxin NADPH-dependent glutamate synthase beta chain and related oxidoreductases Fe-S-cluster-containing hydrogenase components 2 2-polyprenylphenol hydroxylase and related flavodoxin oxidoreductases Heterodisulfide reductase, subunit A and related polyferredoxins Aerobic-type carbon monoxide dehydrogenase, middle subunit CoxM/CutM homologs Pyruvate:ferredoxin oxidoreductase and related 2-oxoacid:ferredoxin oxidoreductases, delta subunit |
| TS28Rum14306 CDS CDS   | 5.0  | 1.0   | 22.7  | E K       | COG1167                                                                         | Transcriptional regulators containing a DNA-binding HTH domain and an aminotransferase domain (MocR family) and their eukaryotic orthologs                                                                                                                                                                                                                                                                                                                                                                                                                                                                                                                  |
| Bcap0277 CDS CDS       | 5.0  | 1.0   | 22.7  | E K       | COG1725 COG1167                                                                 | Predicted transcriptional regulators Transcriptional regulators containing a DNA-binding HTH domain and an aminotransferase domain (MocR family) and their eukaryotic orthologs                                                                                                                                                                                                                                                                                                                                                                                                                                                                             |
| TS29Fae06276 CDS CDS   | 2.0  | 97.5  | 0.1   | E K       | COG1167                                                                         | Transcriptional regulators containing a DNA-binding HTH domain and an aminotransferase domain (MocR family) and their eukaryotic orthologs                                                                                                                                                                                                                                                                                                                                                                                                                                                                                                                  |
| TS28Bif4197 CDS CDS    | 0.3  | 18.3  | 0.1   | E K       | COG0517 COG0031 COG0626 COG3620                                                 | FOG: CBS domain Cysteine synthase Cystathionine beta-lyases/cystathionine gamma-synthases Predicted transcriptional regulator with C-terminal CBS domains                                                                                                                                                                                                                                                                                                                                                                                                                                                                                                   |
| TS29Fae09891 CDS CDS   | 0.5  | 30.5  | 0.1   | E K       | COG1725 COG1167                                                                 | Predicted transcriptional regulators Transcriptional regulators containing a DNA-binding HTH domain and an aminotransferase domain (MocR family) and their eukaryotic orthologs                                                                                                                                                                                                                                                                                                                                                                                                                                                                             |
| TS29Rum20126 CDS CDS   | 1.0  | 70.0  | 0.1   | E K       | COG1167                                                                         | Transcriptional regulators containing a DNA-binding HTH domain and an aminotransferase domain (MocR family) and their eukaryotic orthologs                                                                                                                                                                                                                                                                                                                                                                                                                                                                                                                  |
| Bfra31124183 CDS CDS   | 2.7  | 0.5   | 24.2  | E K M U Q | COG0793 COG1506 COG4946 COG0823 COG1228 COG3710 COG2319                         | Periplasmic protease Dipeptidyl aminopeptidases/acylaminoacyl-peptidases Uncharacterized protein related to the periplasmic component of the Tol biopolymer transport system Periplasmic component of the Tol biopolymer transport system Imidazolepropiionase and related amidohydrolases DNA-binding winged-HTH domains FOG: WD40 repeat                                                                                                                                                                                                                                                                                                                  |

|                      |      |       |      |           |                                                                                 |                                                                                                                                                                                                                                                                                                                                                                                                                                                       |
|----------------------|------|-------|------|-----------|---------------------------------------------------------------------------------|-------------------------------------------------------------------------------------------------------------------------------------------------------------------------------------------------------------------------------------------------------------------------------------------------------------------------------------------------------------------------------------------------------------------------------------------------------|
| TS29Rum16981 CDS CDS | 2.3  | 131.0 | 0.1  | E K T     | COG0642 COG0834 COG3452 COG2770 COG2198 COG2203 COG3300 COG3437                 | Signal transduction histidine kinase ABC-type amino acid transport/signal transduction systems, periplasmic component/domain Predicted periplasmic ligand-binding sensor domain FOG: HAMP domain FOG: HPT domain FOG: GAF domain MHYT domain (predicted integral membrane sensor domain) Response regulator containing a CheY-like receiver domain and an HD-GYP domain                                                                               |
| TS29Rum14501 CDS CDS | 0.3  | 85.0  | 0.0  | E K T     | COG0642 COG2202 COG0834 COG3452 COG0784 COG3614 COG2198 COG2203 COG3300 COG3437 | Signal transduction histidine kinase FOG: PAS/PAC domain ABC-type amino acid transport/signal transduction systems, periplasmic component/domain Predicted periplasmic ligand-binding sensor domain FOG: CheY-like receiver Predicted periplasmic ligand-binding sensor domain FOG: HPT domain FOG: GAF domain MHYT domain (predicted integral membrane sensor domain) Response regulator containing a CheY-like receiver domain and an HD-GYP domain |
| TS29Bif3488 CDS CDS  | 0.5  | 82.7  | 0.0  | E M       | COG0329                                                                         | Dihydrodipicolinate synthase/N-acetylneuraminase lyase                                                                                                                                                                                                                                                                                                                                                                                                |
| TS28Fae16417 CDS CDS | 5.5  | 1.5   | 16.6 | E N P K T | COG5001 COG3706 COG2199 COG0004 COG0840 COG2208 COG0347                         | Predicted signal transduction protein containing a membrane domain, an EAL and a GGDEF domain Response regulator containing a CheY-like receiver domain and a GGDEF domain FOG: GGDEF domain Ammonia permease Methyl-accepting chemotaxis protein Serine phosphatase RsbU, regulator of sigma subunit Nitrogen regulatory protein PII                                                                                                                 |
| TS29Clo3828 CDS CDS  | 17.0 | 3.0   | 25.7 | E P       | COG0601                                                                         | ABC-type dipeptide/oligopeptide/nickel transport systems, permease components                                                                                                                                                                                                                                                                                                                                                                         |
| TS29Clo3829 CDS CDS  | 14.0 | 5.0   | 12.7 | E P       | COG1173                                                                         | ABC-type dipeptide/oligopeptide/nickel transport systems, permease components                                                                                                                                                                                                                                                                                                                                                                         |
| TS29Bif3453 CDS CDS  | 0.5  | 33.7  | 0.1  | E P       | COG1173 COG0444 COG1123 COG4608 COG4172                                         | ABC-type dipeptide/oligopeptide/nickel transport systems, permease components ABC-type dipeptide/oligopeptide/nickel transport system, ATPase component ATPase components of various ABC-type transport systems, contain duplicated ATPase ABC-type oligopeptide transport system, ATPase component ABC-type uncharacterized transport system, duplicated ATPase component                                                                            |
| TS29Bif2499 CDS CDS  | 0.3  | 76.0  | 0.0  | E P       | COG0601                                                                         | ABC-type dipeptide/oligopeptide/nickel transport systems, permease components                                                                                                                                                                                                                                                                                                                                                                         |
| TS28Bac5663 CDS CDS  | 1.7  | 0.3   | 22.7 | E T       | COG0642 COG2202 COG0834 COG3452 COG2770 COG2198 COG2203 COG5278                 | Signal transduction histidine kinase FOG: PAS/PAC domain ABC-type amino acid transport/signal transduction systems, periplasmic component/domain Predicted periplasmic ligand-binding sensor domain FOG: HAMP domain FOG: HPT domain FOG: GAF domain Predicted periplasmic ligand-binding sensor domain                                                                                                                                               |
| TS28Fae16116 CDS CDS | 6.0  | 1.5   | 18.2 | E T       | COG0834                                                                         | ABC-type amino acid transport/signal transduction systems, periplasmic component/domain                                                                                                                                                                                                                                                                                                                                                               |
| TS28Dor0126 CDS CDS  | 1.5  | 0.5   | 13.6 | E T       | COG0589 COG0531                                                                 | Universal stress protein UspA and related nucleotide-binding proteins Amino acid transporters                                                                                                                                                                                                                                                                                                                                                         |
| TS28Rum01026 CDS CDS | 8.5  | 3.0   | 12.9 | E T       | COG0834                                                                         | ABC-type amino acid transport/signal transduction systems, periplasmic component/domain                                                                                                                                                                                                                                                                                                                                                               |
| TS29Bac00259 CDS CDS | 0.3  | 16.0  | 0.1  | E T       | COG0642 COG5002 COG2202 COG0834 COG3452 COG2770 COG2198 COG3300 COG3322         | Signal transduction histidine kinase Signal transduction histidine kinase FOG: PAS/PAC domain ABC-type amino acid transport/signal transduction systems, periplasmic component/domain Predicted periplasmic ligand-binding sensor domain FOG: HAMP domain FOG: HPT domain MHYT domain (predicted integral membrane sensor domain) Predicted periplasmic ligand-binding sensor domain                                                                  |
| TS29Clo0809 CDS CDS  | 0.5  | 32.0  | 0.1  | E T       | COG0834 COG0765                                                                 | ABC-type amino acid transport/signal transduction systems, periplasmic component/domain ABC-type amino acid transport system, permease component                                                                                                                                                                                                                                                                                                      |
| TS29Bac09401 CDS CDS | 0.3  | 24.8  | 0.1  | E T       | COG0642 COG2202 COG0834 COG2770 COG0784 COG3614 COG2198 COG3300 COG3322         | Signal transduction histidine kinase FOG: PAS/PAC domain ABC-type amino acid transport/signal transduction systems, periplasmic component/domain FOG: HAMP domain FOG: CheY-like receiver Predicted periplasmic ligand-binding sensor domain FOG: HPT domain MHYT domain (predicted integral membrane sensor domain) Predicted periplasmic ligand-binding sensor domain                                                                               |
| TS28Bif4907 CDS CDS  | 0.3  | 31.3  | 0.0  | E T       | COG0834 COG0765 COG4160                                                         | ABC-type amino acid transport/signal transduction systems, periplasmic component/domain ABC-type amino acid transport system, permease component ABC-type arginine/histidine transport system, permease component                                                                                                                                                                                                                                     |
| TS29Bif3471 CDS CDS  | 0.3  | 31.3  | 0.0  | E T       | COG0834 COG0765 COG4160                                                         | ABC-type amino acid transport/signal transduction systems, periplasmic component/domain ABC-type amino acid transport system, permease component ABC-type arginine/histidine transport system, permease component                                                                                                                                                                                                                                     |
| TS28Bif4821 CDS CDS  | 0.3  | 26.8  | 0.0  | E T       | COG0834                                                                         | ABC-type amino acid transport/signal transduction systems, periplasmic component/domain                                                                                                                                                                                                                                                                                                                                                               |
| TS29Bif3400 CDS CDS  | 0.3  | 26.8  | 0.0  | E T       | COG0834                                                                         | ABC-type amino acid transport/signal transduction systems, periplasmic component/domain                                                                                                                                                                                                                                                                                                                                                               |
| TS29Bif3473 CDS CDS  | 0.3  | 28.2  | 0.0  | E T       | COG0834                                                                         | ABC-type amino acid transport/signal transduction systems, periplasmic component/domain                                                                                                                                                                                                                                                                                                                                                               |
| TS28Bif4909 CDS CDS  | 0.3  | 35.2  | 0.0  | E T       | COG0834                                                                         | ABC-type amino acid transport/signal transduction systems, periplasmic component/domain                                                                                                                                                                                                                                                                                                                                                               |
| TS29Bif1558 CDS CDS  | 0.3  | 16.0  | 0.1  | E V       | COG1123 COG4608 COG4172 COG4167                                                 | ATPase components of various ABC-type transport systems, contain duplicated ATPase ABC-type oligopeptide transport system, ATPase component ABC-type uncharacterized transport system, duplicated ATPase component ABC-type antimicrobial peptide transport system, ATPase component                                                                                                                                                                  |
| TS28Rum01433 CDS CDS | 11.0 | 0.5   | 99.9 | F         | COG1781                                                                         | Aspartate carbamoyltransferase, regulatory subunit                                                                                                                                                                                                                                                                                                                                                                                                    |
| Caer0679 CDS CDS     | 8.0  | 0.5   | 72.6 | F         | COG0540                                                                         | Aspartate carbamoyltransferase, catalytic chain                                                                                                                                                                                                                                                                                                                                                                                                       |
| TS28Col0100 CDS CDS  | 10.0 | 1.0   | 45.4 | F         | COG2759                                                                         | Formyltetrahydrofolate synthetase                                                                                                                                                                                                                                                                                                                                                                                                                     |
| Bun13233 CDS CDS     | 5.0  | 0.5   | 45.4 | F         | COG0151                                                                         | Phosphoribosylamine-glycine ligase                                                                                                                                                                                                                                                                                                                                                                                                                    |
| TS28Rum13596 CDS CDS | 4.8  | 0.5   | 43.9 | F         | COG0461                                                                         | Orotate phosphoribosyltransferase                                                                                                                                                                                                                                                                                                                                                                                                                     |
| Caer0038 CDS CDS     | 4.7  | 0.5   | 42.7 | F         | COG0628 COG0152 COG1828                                                         | Predicted permease Phosphoribosylaminoimidazolesuccinocarboxamide (SAICAR) synthase Phosphoribosylformylglycinamide (FGAM) synthase, PurS component                                                                                                                                                                                                                                                                                                   |
| BactD12686 CDS CDS   | 4.6  | 0.5   | 41.8 | F         | COG0461 COG0284                                                                 | Orotate phosphoribosyltransferase Orotidine-5'-phosphate decarboxylase                                                                                                                                                                                                                                                                                                                                                                                |
| TS29Bac04006 CDS CDS | 8.0  | 1.0   | 36.3 | F         | COG0034                                                                         | Glutamine phosphoribosylpyrophosphate amidotransferase                                                                                                                                                                                                                                                                                                                                                                                                |
| CspM6212487 CDS CDS  | 8.0  | 1.0   | 36.3 | F         | COG0104                                                                         | Adenylosuccinate synthase                                                                                                                                                                                                                                                                                                                                                                                                                             |
| Dfor2397 CDS CDS     | 7.0  | 1.0   | 31.8 | F         | COG0041 COG0151                                                                 | Phosphoribosylcarboxyaminoimidazole (NCAR) mutase Phosphoribosylamine glycine ligase                                                                                                                                                                                                                                                                                                                                                                  |
| Caer1152 CDS CDS     | 3.5  | 0.5   | 31.8 | F         | COG0150                                                                         | Phosphoribosylaminoimidazole (AIR) synthetase                                                                                                                                                                                                                                                                                                                                                                                                         |
| TS28Rum01565 CDS CDS | 3.5  | 0.5   | 31.8 | F         | COG0194                                                                         | Guanylate kinase                                                                                                                                                                                                                                                                                                                                                                                                                                      |

|                                |       |       |      |   |                         |                                                                                                                                                         |
|--------------------------------|-------|-------|------|---|-------------------------|---------------------------------------------------------------------------------------------------------------------------------------------------------|
| Buni2664 CDS CDS               | 2.3   | 0.3   | 31.8 | F | COG0628 COG0152 COG1828 | Predicted permease Phosphoribosylaminoimidazolesuccinocarboxamide (SAICAR) synthase Phosphoribosylformylglycinamide (FGAM) synthase, PurS component     |
| TS28Bac3721 CDS CDS            | 2.3   | 0.3   | 31.8 | F | COG0628 COG0152 COG1828 | Predicted permease Phosphoribosylaminoimidazolesuccinocarboxamide (SAICAR) synthase Phosphoribosylformylglycinamide (FGAM) synthase, PurS component     |
| Buni1076 CDS CDS               | 3.4   | 0.5   | 31.0 | F | COG0044                 | Dihydroorotase and related cyclic amidohydrolases                                                                                                       |
| Buni2114 CDS CDS               | 6.2   | 1.0   | 28.0 | F | COG0504                 | CTP synthase (UTP-ammonia lyase)                                                                                                                        |
| Bxyl0136 CDS CDS               | 2.0   | 0.3   | 27.2 | F | COG0504                 | CTP synthase (UTP-ammonia lyase)                                                                                                                        |
| Cbol2804 CDS CDS               | 6.0   | 1.0   | 27.2 | F | COG0402                 | Cytosine deaminase and related metal-dependent hydrolases                                                                                               |
| TS28Col1501 CDS CDS            | 6.0   | 1.0   | 27.2 | F | COG0104                 | Adenylosuccinate synthase                                                                                                                               |
| TS28Rum11469 CDS CDS           | 6.0   | 1.0   | 27.2 | F | COG0563                 | Adenylate kinase and related kinases                                                                                                                    |
| Bxyl2800 CDS CDS               | 3.0   | 0.5   | 27.2 | F | COG0105                 | Nucleoside diphosphate kinase                                                                                                                           |
| TS28Fae12461 CDS CDS           | 3.0   | 0.5   | 27.2 | F | COG0213                 | Thymidine phosphorylase                                                                                                                                 |
| Aput1498 CDS CDS               | 17.0  | 3.0   | 25.7 | F | COG1864                 | DNA/RNA endonuclease G, NUC1                                                                                                                            |
| TS28Dor0623 CDS CDS            | 2.7   | 0.5   | 24.2 | F | COG0015                 | Adenylosuccinate lyase                                                                                                                                  |
| TS28Rum11255 CDS CDS           | 207.8 | 40.8  | 23.1 | F | COG2759                 | Formyltetrahydrofolate synthetase                                                                                                                       |
| TS28Clo03814 CDS CDS           | 2.5   | 0.5   | 22.7 | F | COG0015                 | Adenylosuccinate lyase                                                                                                                                  |
| Buni2085 CDS CDS               | 7.5   | 1.5   | 22.7 | F | COG0540                 | Aspartate carbamoyltransferase, catalytic chain                                                                                                         |
| TS28Met0774 CDS CDS            | 1.5   | 0.3   | 20.4 | F | COG2019                 | Archaeal adenylate kinase                                                                                                                               |
| TS28Bac1849 CDS CDS            | 4.2   | 1.0   | 18.9 | F | COG0504                 | CTP synthase (UTP-ammonia lyase)                                                                                                                        |
| TS29Bac02991 CDS CDS           | 16.5  | 4.0   | 18.7 | F | COG0005                 | Purine nucleoside phosphorylase                                                                                                                         |
| TS29Bac11630 CDS CDS           | 1.0   | 0.3   | 18.2 | F | COG0047                 | Phosphoribosylformylglycinamide (FGAM) synthase, glutamine amidotransferase domain                                                                      |
| Casp0141 CDS CDS               | 4.0   | 1.0   | 18.2 | F | COG0209                 | Ribonucleotide reductase, alpha subunit                                                                                                                 |
| Cbol2796 CDS CDS               | 8.0   | 2.0   | 18.2 | F | COG0044                 | Dihydroorotase and related cyclic amidohydrolases                                                                                                       |
| Acod1471 CDS CDS               | 4.0   | 1.0   | 18.2 | F | COG0138                 | AICAR transformylase/IMP cyclohydrolase PurH (only IMP cyclohydrolase domain in Aful)                                                                   |
| TS28Fae08603 CDS CDS           | 4.0   | 1.0   | 18.2 | F | COG0528                 | Uridylate kinase                                                                                                                                        |
| TS28Eub3124 CDS CDS            | 11.0  | 3.0   | 16.6 | F | COG0504                 | CTP synthase (UTP-ammonia lyase)                                                                                                                        |
| TS29Rum00369 CDS CDS           | 214.8 | 60.8  | 16.0 | F | COG2759                 | Formyltetrahydrofolate synthetase                                                                                                                       |
| TS28Fae18538 CDS CDS           | 3.5   | 1.0   | 15.9 | F | COG0104                 | Adenylosuccinate synthase                                                                                                                               |
| BactD24022 CDS CDS             | 2.8   | 0.8   | 15.4 | F | COG0034                 | Glutamine phosphoribosylpyrophosphate amidotransferase                                                                                                  |
| TS28Rum11152 CDS CDS           | 1.7   | 0.5   | 15.1 | F | COG0737                 | 5'-nucleotidase/2',3'-cyclic phosphodiesterase and related esterases                                                                                    |
| Robe3140 CDS CDS               | 1.7   | 0.5   | 15.1 | F | COG0737                 | 5'-nucleotidase/2',3'-cyclic phosphodiesterase and related esterases                                                                                    |
| TS28Rum13591 CDS CDS           | 15.0  | 4.5   | 15.1 | F | COG0402                 | Cytosine deaminase and related metal-dependent hydrolases                                                                                               |
| Aput0452 CDS CDS               | 13.0  | 4.0   | 14.8 | F | COG1864                 | DNA/RNA endonuclease G, NUC1                                                                                                                            |
| Bsp1160292 CDS CDS             | 3.3   | 1.0   | 14.8 | F | COG0034                 | Glutamine phosphoribosylpyrophosphate amidotransferase                                                                                                  |
| BactD20170 CDS CDS             | 3.2   | 1.0   | 14.4 | F | COG0138 COG0299         | AICAR transformylase/IMP cyclohydrolase PurH (only IMP cyclohydrolase domain in Aful) Folate-dependent phosphoribosylglycinamide formyltransferase PurN |
| TS28Fae00252 CDS CDS           | 17.2  | 5.5   | 14.2 | F | COG1328                 | Oxygen-sensitive ribonucleoside-triphosphate reductase                                                                                                  |
| TS28Met0704 CDS CDS            | 3.1   | 1.0   | 14.0 | F | COG0104                 | Adenylosuccinate synthase                                                                                                                               |
| Msmi741106 CDS CDS             | 3.1   | 1.0   | 14.0 | F | COG0104                 | Adenylosuccinate synthase                                                                                                                               |
| TS28Fae12449 CDS CDS           | 1.0   | 0.3   | 13.6 | F | COG0634                 | Hypoxanthine-guanine phosphoribosyltransferase                                                                                                          |
| Robe0274 CDS CDS               | 3.0   | 1.0   | 13.6 | F | COG0402                 | Cytosine deaminase and related metal-dependent hydrolases                                                                                               |
| BactD10713 CDS CDS             | 3.0   | 1.0   | 13.6 | F | COG0034                 | Glutamine phosphoribosylpyrophosphate amidotransferase                                                                                                  |
| Caer1176 CDS CDS               | 1.5   | 0.5   | 13.6 | F | COG0104                 | Adenylosuccinate synthase                                                                                                                               |
| TS28Met0716 CDS CDS            | 0.8   | 0.3   | 13.6 | F | COG1328                 | Oxygen-sensitive ribonucleoside-triphosphate reductase                                                                                                  |
| RintL12790 CDS CDS             | 3.0   | 1.0   | 13.6 | F | COG0461                 | Orotate phosphoribosyltransferase                                                                                                                       |
| Dfor1645 CDS CDS               | 3.0   | 1.0   | 13.6 | F | COG0756                 | dUTPase                                                                                                                                                 |
| Dfor0658 CDS CDS               | 3.0   | 1.0   | 13.6 | F | COG0528                 | Uridylate kinase                                                                                                                                        |
| TS28Rum07207 CDS CDS           | 1.5   | 0.5   | 13.6 | F | COG0044                 | Dihydroorotase and related cyclic amidohydrolases                                                                                                       |
| TS28Met0771 CDS CDS            | 3.0   | 1.0   | 13.6 | F | COG1102                 | Cytidylate kinase                                                                                                                                       |
| TS28Bac0463 CDS CDS            | 13.4  | 4.8   | 12.6 | F | COG0519                 | GMP synthase, PP-ATPase domain/subunit                                                                                                                  |
| Bova0255 CDS CDS               | 0.9   | 0.3   | 12.5 | F | COG0015                 | Adenylosuccinate lyase                                                                                                                                  |
| Bxyl3255 CDS CDS               | 0.9   | 0.3   | 12.5 | F | COG0563                 | Adenylate kinase and related kinases                                                                                                                    |
| Fpram2121674 CDS CDS           | 1.3   | 0.5   | 12.1 | F | COG0540                 | Aspartate carbamoyltransferase, catalytic chain                                                                                                         |
| Bxy10267 CDS CDS               | 1.3   | 0.5   | 12.1 | F | COG1781 COG0540         | Aspartate carbamoyltransferase, regulatory subunit Aspartate carbamoyltransferase, catalytic chain                                                      |
| TS28Bac2305 CDS CDS            | 1.3   | 0.5   | 12.1 | F | COG4085 COG0737         | Predicted RNA-binding protein, contains TRAM domain 5'-nucleotidase/2',3'-cyclic phosphodiesterase and related esterases                                |
| Buni0314 CDS CDS               | 1.3   | 0.5   | 12.1 | F | COG0737 COG4085         | 5'-nucleotidase/2',3'-cyclic phosphodiesterase and related esterases Predicted RNA-binding protein, contains TRAM domain                                |
| Dfor2394 CDS CDS               | 2.5   | 1.0   | 11.3 | F | COG0151                 | Phosphoribosylamine-glycine ligase                                                                                                                      |
| Bcap0049 CDS CDS               | 5.0   | 2.0   | 11.3 | F | COG2820 COG0813         | Uridine phosphorylase Purine-nucleoside phosphorylase                                                                                                   |
| Bfnctc2965 CDS Dihydroorotase  | 2.5   | 1.0   | 11.3 | F | COG0044                 | Dihydroorotase and related cyclic amidohydrolases                                                                                                       |
| ShigspD91910 CDS CDS           | 2.5   | 1.0   | 11.3 | F | COG0402                 | Cytosine deaminase and related metal-dependent hydrolases                                                                                               |
| TS28Rum01303 CDS CDS           | 5.0   | 2.0   | 11.3 | F | COG2759                 | Formyltetrahydrofolate synthetase                                                                                                                       |
| Rtor0303 CDS CDS               | 5.0   | 2.0   | 11.3 | F | COG2131                 | Deoxyctdylate deaminase                                                                                                                                 |
| BFvch463129 CDS Dihydroorotase | 2.5   | 1.0   | 11.3 | F | COG0044                 | Dihydroorotase and related cyclic amidohydrolases                                                                                                       |
| Bxyl3060 CDS CDS               | 3.8   | 1.5   | 11.3 | F | COG0461 COG0284         | Orotate phosphoribosyltransferase Orotidine-5'-phosphate decarboxylase                                                                                  |
| TS28Rum07577 CDS CDS           | 7.0   | 3.0   | 10.6 | F | COG2233                 | Xanthine/uracil permeases                                                                                                                               |
| Acae2193 CDS CDS               | 7.0   | 3.0   | 10.6 | F | COG0034                 | Glutamine phosphoribosylpyrophosphate amidotransferase                                                                                                  |
| TS28Rum10128 CDS CDS           | 3.0   | 1.3   | 10.2 | F | COG0563                 | Adenylate kinase and related kinases                                                                                                                    |
| TS29Rum01847 CDS CDS           | 3.0   | 1.3   | 10.2 | F | COG0563                 | Adenylate kinase and related kinases                                                                                                                    |
| TS29Bif3957 CDS CDS            | 2.6   | 118.3 | 0.1  | F | COG1328                 | Oxygen-sensitive ribonucleoside-triphosphate reductase                                                                                                  |
| TS29Bif3435 CDS CDS            | 1.5   | 68.7  | 0.1  | F | COG0232                 | dGTP triphosphohydrolase                                                                                                                                |
| TS28Fae18590 CDS CDS           | 1.0   | 46.0  | 0.1  | F | COG2759                 | Formyltetrahydrofolate synthetase                                                                                                                       |
| Fpram2120495 CDS CDS           | 0.3   | 15.5  | 0.1  | F | COG0151                 | Phosphoribosylamine-glycine ligase                                                                                                                      |
| TS29Bif4130 CDS CDS            | 1.8   | 82.5  | 0.1  | F | COG1957                 | Inosine-uridine nucleoside N-ribosyltransferase                                                                                                         |
| TS28Bif382 CDS CDS             | 0.3   | 12.0  | 0.1  | F | COG1051 COG4111         | ADP-ribose pyrophosphatase Uncharacterized conserved protein                                                                                            |
| TS28Rum01287 CDS CDS           | 0.3   | 16.0  | 0.1  | F | COG0044                 | Dihydroorotase and related cyclic amidohydrolases                                                                                                       |
| TS28Bif4955 CDS CDS            | 0.8   | 41.3  | 0.1  | F | COG0167                 | Dihydroorotate dehydrogenase                                                                                                                            |
| TS28Bif1061 CDS CDS            | 1.0   | 49.8  | 0.1  | F | COG1957                 | Inosine-uridine nucleoside N-ribosyltransferase                                                                                                         |
| TS29Bif3977 CDS CDS            | 1.0   | 49.8  | 0.1  | F | COG1957                 | Inosine-uridine nucleoside N-ribosyltransferase                                                                                                         |
| TS28Fae13852 CDS CDS           | 0.3   | 17.5  | 0.1  | F | COG0572                 | Uridine kinase                                                                                                                                          |
| TS29Bif1808 CDS CDS            | 0.5   | 26.5  | 0.1  | F | COG2233                 | Xanthine/uracil permeases                                                                                                                               |
| BLD0532 CDS Dihydroorotase     | 0.3   | 13.8  | 0.1  | F | COG0044                 | Dihydroorotase and related cyclic amidohydrolases                                                                                                       |
| TS29Bif1915 CDS CDS            | 0.3   | 14.2  | 0.1  | F | COG0517 COG0516         | FOG: CBS domain IMP dehydrogenase/GMP reductase                                                                                                         |
| Bpse0403 CDS CDS               | 0.2   | 11.7  | 0.1  | F | COG0047 COG0046         | Phosphoribosylformylglycinamide (FGAM) synthase, glutamine amidotransferase domain Phosphoribosylformylglycinamide (FGAM) synthase, synthetase domain   |
| TS28Bif2011 CDS CDS            | 0.3   | 15.0  | 0.1  | F | COG0044                 | Dihydroorotase and related cyclic amidohydrolases                                                                                                       |
| TS28Fae20471 CDS CDS           | 0.2   | 10.0  | 0.1  | F | COG2131                 | Deoxyctdylate deaminase                                                                                                                                 |

|                            |       |       |         |         |                                                                 |                                                                                                                                                                                                                                                                                                                                                                                                                                                                           |
|----------------------------|-------|-------|---------|---------|-----------------------------------------------------------------|---------------------------------------------------------------------------------------------------------------------------------------------------------------------------------------------------------------------------------------------------------------------------------------------------------------------------------------------------------------------------------------------------------------------------------------------------------------------------|
| TS28Bif0542 CDS CDS        | 0.5   | 30.0  | 0.1     | F       | COG0209 COG1780                                                 | Ribonucleotide reductase, alpha subunit Protein involved in ribonucleotide reduction                                                                                                                                                                                                                                                                                                                                                                                      |
| TS29Rum15735 CDS CDS       | 1.0   | 65.0  | 0.1     | F       | COG1328                                                         | Oxygen-sensitive ribonucleoside-triphosphate reductase                                                                                                                                                                                                                                                                                                                                                                                                                    |
| TS28Fae18849 CDS CDS       | 1.0   | 67.0  | 0.1     | F       | COG0504                                                         | CTP synthase (UTP-ammonia lyase)                                                                                                                                                                                                                                                                                                                                                                                                                                          |
| TS29Fae00514 CDS CDS       | 0.5   | 34.5  | 0.1     | F       | COG0528                                                         | Uridylate kinase                                                                                                                                                                                                                                                                                                                                                                                                                                                          |
| TS29Fae00439 CDS CDS       | 0.5   | 35.0  | 0.1     | F       | COG0503                                                         | Adenine/guanine phosphoribosyltransferases and related PRPP-binding proteins                                                                                                                                                                                                                                                                                                                                                                                              |
| Beat0239 CDS CDS           | 0.2   | 12.0  | 0.1     | F       | COG1328                                                         | Oxygen-sensitive ribonucleoside-triphosphate reductase                                                                                                                                                                                                                                                                                                                                                                                                                    |
| TS28Bif0289 CDS CDS        | 0.4   | 30.1  | 0.1     | F       | COG2233                                                         | Xanthine/uracil permeases                                                                                                                                                                                                                                                                                                                                                                                                                                                 |
| TS28Bif1981 CDS CDS        | 0.3   | 19.5  | 0.1     | F       | COG0517 COG0516                                                 | FOG: CBS domain IMP dehydrogenase/GMP reductase                                                                                                                                                                                                                                                                                                                                                                                                                           |
| TS28Bif4257 CDS CDS        | 0.2   | 16.7  | 0.1     | F       | COG0047 COG0046                                                 | Phosphoribosylformylglycinamide (FGAM) synthase, glutamine amidotransferase domain Phosphoribosylformylglycinamide (FGAM) synthase, synthetase domain                                                                                                                                                                                                                                                                                                                     |
| TS29Fae04525 CDS CDS       | 0.2   | 14.0  | 0.1     | F       | COG2131                                                         | Deoxycytidylate deaminase                                                                                                                                                                                                                                                                                                                                                                                                                                                 |
| TS29Bif2554 CDS CDS        | 0.3   | 21.8  | 0.1     | F       | COG0756                                                         | dUTPase                                                                                                                                                                                                                                                                                                                                                                                                                                                                   |
| TS29Col0937 CDS CDS        | 0.5   | 47.0  | 0.0     | F       | COG0504                                                         | CTP synthase (UTP-ammonia lyase)                                                                                                                                                                                                                                                                                                                                                                                                                                          |
| TS28Bif2012 CDS CDS        | 0.3   | 24.4  | 0.0     | F       | COG0284 COG0461                                                 | Orotidine-5'-phosphate decarboxylase Orotate phosphoribosyltransferase                                                                                                                                                                                                                                                                                                                                                                                                    |
| TS29Bif2886 CDS CDS        | 0.3   | 24.4  | 0.0     | F       | COG0284 COG0461                                                 | Orotidine-5'-phosphate decarboxylase Orotate phosphoribosyltransferase                                                                                                                                                                                                                                                                                                                                                                                                    |
| TS29Bif3404 CDS CDS        | 0.5   | 50.8  | 0.0     | F       | COG0034                                                         | Glutamine phosphoribosylpyrophosphate amidotransferase                                                                                                                                                                                                                                                                                                                                                                                                                    |
| TS29Bif3512 CDS CDS        | 0.8   | 91.3  | 0.0     | F       | COG0167                                                         | Dihydroorotate dehydrogenase                                                                                                                                                                                                                                                                                                                                                                                                                                              |
| TS29Bif3001 CDS CDS        | 0.4   | 45.4  | 0.0     | F       | COG2233                                                         | Xanthine/uracil permeases                                                                                                                                                                                                                                                                                                                                                                                                                                                 |
| TS29Rum00528 CDS CDS       | 0.5   | 58.5  | 0.0     | F       | COG1957                                                         | Inosine-uridine nucleoside N-ribohydrolase                                                                                                                                                                                                                                                                                                                                                                                                                                |
| TS28Bif5130 CDS CDS        | 0.3   | 43.3  | 0.0     | F       | COG0015                                                         | Adenylosuccinate lyase                                                                                                                                                                                                                                                                                                                                                                                                                                                    |
| TS29Bif4005 CDS CDS        | 0.3   | 43.3  | 0.0     | F       | COG0015                                                         | Adenylosuccinate lyase                                                                                                                                                                                                                                                                                                                                                                                                                                                    |
| TS29Bif1802 CDS CDS        | 0.3   | 44.0  | 0.0     | F       | COG0519                                                         | GMP synthase, PP-ATPase domain/subunit                                                                                                                                                                                                                                                                                                                                                                                                                                    |
| Bl_0792 CDS dihydroorotase | 0.3   | 37.6  | 0.0     | F       | COG0044                                                         | Dihydroorotase and related cyclic amidohydrolases                                                                                                                                                                                                                                                                                                                                                                                                                         |
| TS29RumUnc1503 CDS CDS     | 0.3   | 53.0  | 0.0     | F       | COG0034                                                         | Glutamine phosphoribosylpyrophosphate amidotransferase                                                                                                                                                                                                                                                                                                                                                                                                                    |
| TS29Rum20027 CDS CDS       | 0.5   | 85.0  | 0.0     | F       | COG0034                                                         | Glutamine phosphoribosylpyrophosphate amidotransferase                                                                                                                                                                                                                                                                                                                                                                                                                    |
| TS29Bif3398 CDS CDS        | 0.3   | 44.2  | 0.0     | F       | COG0402                                                         | Cytosine deaminase and related metal-dependent hydrolases                                                                                                                                                                                                                                                                                                                                                                                                                 |
| TS29Bif2887 CDS CDS        | 0.3   | 69.0  | 0.0     | F       | COG0044                                                         | Dihydroorotase and related cyclic amidohydrolases                                                                                                                                                                                                                                                                                                                                                                                                                         |
| TS29Bif1607 CDS CDS        | 0.2   | 58.7  | 0.0     | F       | COG0047 COG0046                                                 | Phosphoribosylformylglycinamide (FGAM) synthase, glutamine amidotransferase domain Phosphoribosylformylglycinamide (FGAM) synthase, synthetase domain                                                                                                                                                                                                                                                                                                                     |
| TS29Fae05320 CDS CDS       | 0.3   | 99.0  | 0.0     | F       | COG2233                                                         | Xanthine/uracil permeases                                                                                                                                                                                                                                                                                                                                                                                                                                                 |
| TS29Bif2486 CDS CDS        | 0.3   | 76.0  | 0.0     | F       | COG1051 COG4111                                                 | ADP-ribose pyrophosphatase Uncharacterized conserved protein                                                                                                                                                                                                                                                                                                                                                                                                              |
| TS29Bif0445 CDS CDS        | 0.5   | 203.3 | 0.0     | F       | COG0209 COG1780                                                 | Ribonucleotide reductase, alpha subunit Protein involved in ribonucleotide reduction                                                                                                                                                                                                                                                                                                                                                                                      |
| TS28Rum13910 CDS CDS       | 75.8  | 11.5  | 29.9    | F C     | COG2080 COG1529 COG4631                                         | Aerobic-type carbon monoxide dehydrogenase, small subunit CoxS/CutS homologs Aerobic-type carbon monoxide dehydrogenase, large subunit CoxL/CutL homologs Xanthine dehydrogenase, molybdopterin-binding subunit B                                                                                                                                                                                                                                                         |
| TS28Rum01177 CDS CDS       | 35.0  | 13.0  | 12.2    | F C     | COG2080 COG1529 COG4631                                         | Aerobic-type carbon monoxide dehydrogenase, small subunit CoxS/CutS homologs Aerobic-type carbon monoxide dehydrogenase, large subunit CoxL/CutL homologs Xanthine dehydrogenase, molybdopterin-binding subunit B                                                                                                                                                                                                                                                         |
| TS28Rum13595 CDS CDS       | 6.5   | 1.5   | 19.7    | F C H   | COG0167 COG0543 COG1146                                         | Dihydroorotate dehydrogenase 2-polypropenylphenol hydroxylase and related flavodoxin oxidoreductases Ferredoxin                                                                                                                                                                                                                                                                                                                                                           |
| TS28Bac2680 CDS CDS        | 4.7   | 0.3   | 63.6    | F H     | COG0283 COG1160 COG0414                                         | Cytidylate kinase Predicted GTPases Pantothenate synthetase                                                                                                                                                                                                                                                                                                                                                                                                               |
| TS29Rum19901 CDS CDS       | 1.0   | 64.0  | 0.1     | F J     | COG0441 COG0572                                                 | Threonyl-tRNA synthetase Uridine kinase                                                                                                                                                                                                                                                                                                                                                                                                                                   |
| TS28Fae07806 CDS CDS       | 2.0   | 0.5   | 18.2    | F J D   | COG0037 COG0634 COG0590                                         | Predicted ATPase of the PP-loop superfamily implicated in cell cycle control Hypoxanthine-guanine phosphoribosyltransferase Cytosine/adenosine deaminases                                                                                                                                                                                                                                                                                                                 |
| TS28Fae12448 CDS CDS       | 3.0   | 1.0   | 13.6    | F J D   | COG0037 COG0634 COG0590                                         | Predicted ATPase of the PP-loop superfamily implicated in cell cycle control Hypoxanthine-guanine phosphoribosyltransferase Cytosine/adenosine deaminases                                                                                                                                                                                                                                                                                                                 |
| TS29Bif3875 CDS CDS        | 2.0   | 133.0 | 0.1     | F J D   | COG0037 COG0634 COG0590                                         | Predicted ATPase of the PP-loop superfamily implicated in cell cycle control Hypoxanthine-guanine phosphoribosyltransferase Cytosine/adenosine deaminases                                                                                                                                                                                                                                                                                                                 |
| TS29Fae05449 CDS CDS       | 0.3   | 78.8  | 0.0     | F K L T | COG4753 COG2207 COG2801 COG2169 COG4977                         | Response regulator containing CheY-like receiver domain and AraC-type DNA-binding domain AraC-type DNA-binding domain-containing proteins Transposase and inactivated derivatives Adenosine deaminase Transcriptional regulator containing an amidase domain and an AraC-type DNA-binding HTH domain                                                                                                                                                                      |
| TS28Bif2152 CDS CDS        | 0.5   | 25.0  | 0.1     | F K T   | COG4753 COG2207 COG2169 COG4977                                 | Response regulator containing CheY-like receiver domain and AraC-type DNA-binding domain AraC-type DNA-binding domain-containing proteins Adenosine deaminase Transcriptional regulator containing an amidase domain and an AraC-type DNA-binding HTH domain                                                                                                                                                                                                              |
| TS29Bif3571 CDS CDS        | 0.5   | 27.7  | 0.1     | F K T   | COG4753 COG2207 COG2169 COG4977                                 | Response regulator containing CheY-like receiver domain and AraC-type DNA-binding domain AraC-type DNA-binding domain-containing proteins Adenosine deaminase Transcriptional regulator containing an amidase domain and an AraC-type DNA-binding HTH domain                                                                                                                                                                                                              |
| TS29Rum20550 CDS CDS       | 1.5   | 90.5  | 0.1     | F K T   | COG4753 COG2207 COG2204 COG4936 COG3706 COG2197 COG2169         | Response regulator containing CheY-like receiver domain and AraC-type DNA-binding domain AraC-type DNA-binding domain-containing proteins Response regulator containing CheY-like receiver, AAA-type ATPase, and DNA-binding domains Predicted sensor domain Response regulator containing a CheY-like receiver domain and a GGDEF domain Response regulator containing a CheY-like receiver domain and an HTH DNA-binding domain Adenosine deaminase                     |
| TS29Fae07229 CDS CDS       | 1.0   | 158.0 | 0.0     | F K T   | COG5002 COG0745 COG4753 COG2207 COG2204 COG4936 COG2169 COG4565 | Signal transduction histidine kinase Response regulators consisting of a CheY-like receiver domain and a winged-helix DNA-binding domain Response regulator containing CheY-like receiver domain and AraC-type DNA-binding domain AraC-type DNA-binding domain-containing proteins Response regulator containing CheY-like receiver, AAA-type ATPase, and DNA-binding domains Predicted sensor domain Adenosine deaminase Response regulator of citrate/malate metabolism |
| TS29Fae03757 CDS CDS       | 0.3   | 54.0  | 0.0     | F K T   | COG4753 COG2207 COG2169 COG4977                                 | Response regulator containing CheY-like receiver domain and AraC-type DNA-binding domain AraC-type DNA-binding domain-containing proteins Adenosine deaminase Transcriptional regulator containing an amidase domain and an AraC-type DNA-binding HTH domain                                                                                                                                                                                                              |
| Chv12219 CDS CDS           | 299.6 | 1.0   | 1,360.1 | G       | COG1879                                                         | ABC-type sugar transport system, periplasmic component                                                                                                                                                                                                                                                                                                                                                                                                                    |
| TS28Rum14205 CDS CDS       | 50.0  | 1.0   | 227.0   | G       | COG1879 COG4213                                                 | ABC-type sugar transport system, periplasmic component ABC-type xylose transport system, periplasmic component                                                                                                                                                                                                                                                                                                                                                            |
| Bste1249 CDS CDS           | 33.3  | 1.0   | 151.0   | G       | COG1830                                                         | DhnA-type fructose-1,6-bisphosphate aldolase and related enzymes                                                                                                                                                                                                                                                                                                                                                                                                          |



|                                   |       |      |       |   |                                         |                                                                                                                                                                                                                                                                                                                               |
|-----------------------------------|-------|------|-------|---|-----------------------------------------|-------------------------------------------------------------------------------------------------------------------------------------------------------------------------------------------------------------------------------------------------------------------------------------------------------------------------------|
| Robe3405 CDS CDS                  | 27.5  | 1.0  | 124.8 | G | COG1879 COG1129                         | ABC-type sugar transport system, periplasmic component ABC-type sugar transport system, ATPase component                                                                                                                                                                                                                      |
| FpraM2122375 CDS CDS              | 12.2  | 0.5  | 110.5 | G | COG1129                                 | ABC-type sugar transport system, ATPase component                                                                                                                                                                                                                                                                             |
| Caer2199 CDS CDS                  | 11.0  | 0.5  | 99.9  | G | COG1653                                 | ABC-type sugar transport system, periplasmic component                                                                                                                                                                                                                                                                        |
| BactD23013 CDS CDS                | 5.2   | 0.3  | 93.8  | G | COG0524                                 | Sugar kinases, ribokinase family                                                                                                                                                                                                                                                                                              |
| TS28Eub0689 CDS CDS               | 28.5  | 1.5  | 86.3  | G | COG0296                                 | 1,4-alpha-glucan branching enzyme                                                                                                                                                                                                                                                                                             |
| Bun10654 CDS CDS                  | 35.3  | 2.0  | 80.0  | G | COG1830                                 | DhnA-type fructose-1,6-bisphosphate aldolase and related enzymes                                                                                                                                                                                                                                                              |
| TS29Rum18307 CDS CDS              | 16.7  | 1.0  | 75.7  | G | COG4214 COG1172                         | ABC-type xylose transport system, permease component Ribose/xylose/arabinose/galactoside ABC-type transport systems, permease components                                                                                                                                                                                      |
| Cbol4780 CDS CDS                  | 16.0  | 1.0  | 72.6  | G | COG0149                                 | Triosephosphate isomerase                                                                                                                                                                                                                                                                                                     |
| TS28Fae13066 CDS CDS              | 15.7  | 1.0  | 71.3  | G | COG2017                                 | Galactose mutarotase and related enzymes                                                                                                                                                                                                                                                                                      |
| TS28Clo03232 CDS CDS              | 15.2  | 1.0  | 69.0  | G | COG0057                                 | Glyceraldehyde-3-phosphate dehydrogenase/erythrose-4-phosphate dehydrogenase                                                                                                                                                                                                                                                  |
| Even1737 CDS CDS                  | 4.9   | 0.3  | 66.1  | G | COG2211                                 | Na <sup>+</sup> /melibiose symporter and related transporters                                                                                                                                                                                                                                                                 |
| TS28Fae19104 CDS CDS              | 4.8   | 0.3  | 64.7  | G | COG0448                                 | ADP-glucose pyrophosphorylase                                                                                                                                                                                                                                                                                                 |
| Bsp116444 CDS CDS                 | 13.9  | 1.0  | 62.9  | G | COG0021                                 | Transketolase                                                                                                                                                                                                                                                                                                                 |
| Bun11344 CDS CDS                  | 11.3  | 0.8  | 61.7  | G | COG1640 COG3280                         | 4-alpha-glucanotransferase Maltooligosyl trehalose synthase                                                                                                                                                                                                                                                                   |
| TS28Bac6533 CDS CDS               | 11.3  | 0.8  | 61.7  | G | COG1640 COG3280                         | 4-alpha-glucanotransferase Maltooligosyl trehalose synthase                                                                                                                                                                                                                                                                   |
| Dfor2810 CDS CDS                  | 26.0  | 2.0  | 59.0  | G | COG1653                                 | ABC-type sugar transport system, periplasmic component                                                                                                                                                                                                                                                                        |
| Bun10506 CDS CDS                  | 13.0  | 1.0  | 59.0  | G | COG1904                                 | Glucuronate isomerase                                                                                                                                                                                                                                                                                                         |
| TS28Rum14772 CDS CDS              | 13.0  | 1.0  | 59.0  | G | COG2407                                 | L-fucose isomerase and related proteins                                                                                                                                                                                                                                                                                       |
| ShigspD91165 CDS CDS              | 6.5   | 0.5  | 59.0  | G | COG1653 COG2182                         | ABC-type sugar transport system, periplasmic component Maltose-binding periplasmic proteins/domains                                                                                                                                                                                                                           |
| Bun10307 CDS CDS                  | 6.3   | 0.5  | 57.5  | G | COG2730                                 | Endoglucanase                                                                                                                                                                                                                                                                                                                 |
| Bun12718 CDS CDS                  | 10.2  | 0.8  | 55.4  | G | COG1472                                 | Beta-glucosidase-related glycosidases                                                                                                                                                                                                                                                                                         |
| Bun10942 CDS CDS                  | 23.5  | 2.0  | 53.3  | G | COG0126 COG0149                         | 3-phosphoglycerate kinase Triosephosphate isomerase                                                                                                                                                                                                                                                                           |
| BFvch461653 CDS galactokinase     | 11.5  | 1.0  | 52.2  | G | COG0153                                 | Galactokinase                                                                                                                                                                                                                                                                                                                 |
| Ehal0749 CDS CDS                  | 28.5  | 2.5  | 51.8  | G | COG0296                                 | 1,4-alpha-glucan branching enzyme                                                                                                                                                                                                                                                                                             |
| Even1518 CDS CDS                  | 5.5   | 0.5  | 49.9  | G | COG0574 COG1080 COG3412                 | Phosphoenolpyruvate synthase/pyruvate phosphate dikinase Phosphoenolpyruvate-protein kinase (PTS system EI component in bacteria) Uncharacterized protein conserved in bacteria                                                                                                                                               |
| TS28Rum09615 CDS CDS              | 5.5   | 0.5  | 49.9  | G | COG1803                                 | Methylglyoxal synthase                                                                                                                                                                                                                                                                                                        |
| Bthe7331685 CDS CDS               | 5.4   | 0.5  | 49.0  | G | COG0205                                 | 6-phosphofructokinase                                                                                                                                                                                                                                                                                                         |
| TS28Fae01867 CDS CDS              | 10.7  | 1.0  | 48.6  | G | COG0021 COG3959                         | Transketolase Transketolase, N-terminal subunit                                                                                                                                                                                                                                                                               |
| Clep0321 CDS CDS                  | 5.3   | 0.5  | 48.4  | G | COG0057                                 | Glyceraldehyde-3-phosphate dehydrogenase/erythrose-4-phosphate dehydrogenase                                                                                                                                                                                                                                                  |
| Bova3862 CDS CDS                  | 10.6  | 1.0  | 48.2  | G | COG0057                                 | Glyceraldehyde-3-phosphate dehydrogenase/erythrose-4-phosphate dehydrogenase                                                                                                                                                                                                                                                  |
| TS29Rum05295 CDS CDS              | 41.0  | 4.0  | 46.5  | G | COG1523                                 | Type II secretory pathway, pullulanase PulA and related glycosidases                                                                                                                                                                                                                                                          |
| Caer0050 CDS CDS                  | 5.0   | 0.5  | 45.4  | G | COG0058                                 | Glucan phosphorylase                                                                                                                                                                                                                                                                                                          |
| TS29Rum12185 CDS CDS              | 5.0   | 0.5  | 45.4  | G | COG0366                                 | Glycosidases                                                                                                                                                                                                                                                                                                                  |
| Bado1178 CDS CDS                  | 3.3   | 0.3  | 44.3  | G | COG1653 COG2182                         | ABC-type sugar transport system, periplasmic component Maltose-binding periplasmic proteins/domains                                                                                                                                                                                                                           |
| TS28Rum01018 CDS CDS              | 14.5  | 1.5  | 43.9  | G | COG1501                                 | Alpha-glucosidases, family 31 of glycosyl hydrolases                                                                                                                                                                                                                                                                          |
| Msm1751379 CDS CDS                | 3.0   | 0.3  | 40.9  | G | COG3635                                 | Predicted phosphoglycerate mutase, AP superfamily                                                                                                                                                                                                                                                                             |
| TS28Fae00371 CDS CDS              | 179.8 | 20.5 | 39.8  | G | COG0574 COG4668 COG1080 COG3412 COG2190 | Phosphoenolpyruvate synthase/pyruvate phosphate dikinase Mannitol/fructose-specific phosphotransferase system, IIA domain Phosphoenolpyruvate-protein kinase (PTS system EI component in bacteria) Uncharacterized protein conserved in bacteria Phosphotransferase system IIA components                                     |
| TS28Clo08188 CDS CDS              | 4.3   | 0.5  | 39.3  | G | COG0574 COG4668 COG1080 COG3412 COG2190 | Phosphoenolpyruvate synthase/pyruvate phosphate dikinase Mannitol/fructose-specific phosphotransferase system, IIA domain Phosphoenolpyruvate-protein kinase (PTS system EI component in bacteria) Uncharacterized protein conserved in bacteria Phosphotransferase system IIA components                                     |
| TS28Rum04748 CDS CDS              | 12.8  | 1.5  | 38.8  | G | COG1879                                 | ABC-type sugar transport system, periplasmic component                                                                                                                                                                                                                                                                        |
| TS28Fae08221 CDS CDS              | 42.0  | 5.0  | 38.1  | G | COG1653                                 | ABC-type sugar transport system, periplasmic component                                                                                                                                                                                                                                                                        |
| TS28Rum12400 CDS CDS              | 158.0 | 19.0 | 37.8  | G | COG1653                                 | ABC-type sugar transport system, periplasmic component                                                                                                                                                                                                                                                                        |
| TS28Bac0090 CDS CDS               | 21.9  | 2.7  | 37.2  | G | COG0366 COG1523 COG3281                 | Glycosidases Type II secretory pathway, pullulanase PulA and related glycosidases Uncharacterized protein, probably involved in trehalose biosynthesis                                                                                                                                                                        |
| Bun11687 CDS CDS                  | 36.8  | 4.5  | 37.2  | G | COG0364                                 | Glucose-6-phosphate 1-dehydrogenase                                                                                                                                                                                                                                                                                           |
| BFvch461191 CDS alpha-glucosidase | 4.0   | 0.5  | 36.3  | G | COG2730                                 | Endoglucanase                                                                                                                                                                                                                                                                                                                 |
| Bova2568 CDS CDS                  | 4.0   | 0.5  | 36.3  | G | COG1472                                 | Beta-glucosidase-related glycosidases                                                                                                                                                                                                                                                                                         |
| TS28Rum07352 CDS CDS              | 8.0   | 1.0  | 36.3  | G | COG3715                                 | Phosphotransferase system, mannose/fructose/N-acetylgalactosamine-specific component IIC                                                                                                                                                                                                                                      |
| TS28RumUnc1416 CDS CDS            | 8.0   | 1.0  | 36.3  | G | COG1653                                 | ABC-type sugar transport system, periplasmic component                                                                                                                                                                                                                                                                        |
| Clep1247 CDS CDS                  | 39.5  | 5.0  | 35.9  | G | COG1653                                 | ABC-type sugar transport system, periplasmic component                                                                                                                                                                                                                                                                        |
| TS28Clo10638 CDS CDS              | 144.5 | 18.5 | 35.5  | G | COG1082                                 | Sugar phosphate isomerases/epimerases                                                                                                                                                                                                                                                                                         |
| TS29Clo0163 CDS CDS               | 144.5 | 18.5 | 35.5  | G | COG1082                                 | Sugar phosphate isomerases/epimerases                                                                                                                                                                                                                                                                                         |
| TS28Rum12459 CDS CDS              | 19.0  | 2.5  | 34.5  | G | COG1879 COG4213                         | ABC-type sugar transport system, periplasmic component ABC-type xylose transport system, periplasmic component                                                                                                                                                                                                                |
| Robe3450 CDS CDS                  | 19.0  | 2.5  | 34.5  | G | COG1879 COG4213                         | ABC-type sugar transport system, periplasmic component ABC-type xylose transport system, periplasmic component                                                                                                                                                                                                                |
| TS28Eub5920 CDS CDS               | 7.5   | 1.0  | 34.0  | G | COG1879 COG4214 COG1172 COG4211 COG4158 | ABC-type sugar transport system, periplasmic component ABC-type xylose transport system, permease component Ribose/xylose/arabinose/galactoside ABC-type transport systems, permease components ABC-type glucose/galactose transport system, permease component Predicted ABC-type sugar transport system, permease component |
| TS29Fae06769 CDS CDS              | 7.5   | 1.0  | 34.0  | G | COG0176                                 | Transaldolase                                                                                                                                                                                                                                                                                                                 |
| TS29Bac00193 CDS CDS              | 10.3  | 1.4  | 33.4  | G | COG1830                                 | DhnA-type fructose-1,6-bisphosphate aldolase and related enzymes                                                                                                                                                                                                                                                              |
| Ccom0204 CDS CDS                  | 11.0  | 1.5  | 33.3  | G | COG0057                                 | Glyceraldehyde-3-phosphate dehydrogenase/erythrose-4-phosphate dehydrogenase                                                                                                                                                                                                                                                  |
| BactD23607 CDS CDS                | 2.4   | 0.3  | 32.7  | G | COG0153                                 | Galactokinase                                                                                                                                                                                                                                                                                                                 |
| Bova1248 CDS CDS                  | 2.4   | 0.3  | 32.7  | G | COG0153                                 | Galactokinase                                                                                                                                                                                                                                                                                                                 |
| Cbol1184 CDS CDS                  | 7.0   | 1.0  | 31.8  | G | COG1879 COG4213                         | ABC-type sugar transport system, periplasmic component ABC-type xylose transport system, periplasmic component                                                                                                                                                                                                                |
| Ceut0367 CDS CDS                  | 7.0   | 1.0  | 31.8  | G | COG3839                                 | ABC-type sugar transport systems, ATPase components                                                                                                                                                                                                                                                                           |
| Bun13294 CDS CDS                  | 3.5   | 0.5  | 31.8  | G | COG2407                                 | L-fucose isomerase and related proteins                                                                                                                                                                                                                                                                                       |
| TS29Rum14950 CDS CDS              | 3.5   | 0.5  | 31.8  | G | COG2182                                 | Maltose-binding periplasmic proteins/domains                                                                                                                                                                                                                                                                                  |
| TS28Fae01993 CDS CDS              | 35.0  | 5.0  | 31.8  | G | COG1109                                 | Phosphomannomutase                                                                                                                                                                                                                                                                                                            |
| Bun10655 CDS CDS                  | 27.4  | 4.0  | 31.1  | G | COG0588                                 | Phosphoglycerate mutase I                                                                                                                                                                                                                                                                                                     |
| Cbol1349 CDS CDS                  | 33.0  | 5.0  | 30.0  | G | COG3718                                 | Uncharacterized enzyme involved in inositol metabolism                                                                                                                                                                                                                                                                        |
| TS28Rum16267 CDS CDS              | 6.6   | 1.0  | 29.9  | G | COG1109                                 | Phosphomannomutase                                                                                                                                                                                                                                                                                                            |
| Bun11029 CDS CDS                  | 26.0  | 4.0  | 29.5  | G | COG0153                                 | Galactokinase                                                                                                                                                                                                                                                                                                                 |
| TS28Bif3421 CDS CDS               | 4.3   | 0.7  | 29.5  | G | COG0363                                 | 6-phosphogluconolactonase/Glucosamine-6-phosphate isomerase/deaminase                                                                                                                                                                                                                                                         |

|                                         |       |      |      |   |                                                 |                                                                                                                                                                                                                                                                                            |
|-----------------------------------------|-------|------|------|---|-------------------------------------------------|--------------------------------------------------------------------------------------------------------------------------------------------------------------------------------------------------------------------------------------------------------------------------------------------|
| FpraM2122377/CDS/CDS                    | 31.4  | 4.8  | 29.5 | G | COG1879/COG4213                                 | ABC-type sugar transport system, periplasmic component ABC-type xylose transport system, periplasmic component                                                                                                                                                                             |
| BactD12396/CDS/CDS                      | 1.6   | 0.3  | 29.1 | G | COG3537                                         | Putative alpha-1,2-mannosidase                                                                                                                                                                                                                                                             |
| Bxvl4442/CDS/CDS                        | 1.6   | 0.3  | 29.1 | G | COG3537                                         | Putative alpha-1,2-mannosidase                                                                                                                                                                                                                                                             |
| TS28Rum10083/CDS/CDS                    | 6.3   | 1.0  | 28.8 | G | COG0057                                         | Glyceraldehyde-3-phosphate dehydrogenase/erythrose-4-phosphate dehydrogenase                                                                                                                                                                                                               |
| BactD14124/CDS/CDS                      | 2.1   | 0.3  | 28.4 | G | COG1472                                         | Beta-glucosidase-related glucosidases                                                                                                                                                                                                                                                      |
| TS28Fae16882/CDS/CDS                    | 6.1   | 1.0  | 27.6 | G | COG1879/COG1172 <br>COG4211 COG4158             | ABC-type sugar transport system, periplasmic component Ribose/xylose/arabinose/galactoside ABC-type transport systems, permease components ABC-type glucose/galactose transport system, permease component Predicted ABC-type sugar transport system, permease component                   |
| Bthe7335520/CDS/CDS                     | 6.1   | 1.0  | 27.6 | G | COG0364                                         | Glucose-6-phosphate 1-dehydrogenase                                                                                                                                                                                                                                                        |
| TS28Fae12407/CDS/CDS                    | 9.1   | 1.5  | 27.5 | G | COG1638                                         | TRAP-type C4-dicarboxylate transport system, periplasmic component                                                                                                                                                                                                                         |
| TS28Rum15547/CDS/CDS                    | 148.0 | 24.5 | 27.4 | G | COG1129                                         | ABC-type sugar transport system, ATPase component                                                                                                                                                                                                                                          |
| TS28Bac4043/CDS/CDS                     | 3.0   | 0.5  | 27.2 | G | COG4124                                         | Beta-mannanase                                                                                                                                                                                                                                                                             |
| TS29Fae07452/CDS/CDS                    | 8.0   | 1.3  | 27.2 | G | COG0296                                         | 1,4-alpha-glucan branching enzyme                                                                                                                                                                                                                                                          |
| TS28Rum07429/CDS/CDS                    | 6.0   | 1.0  | 27.2 | G | COG0176                                         | Transaldolase                                                                                                                                                                                                                                                                              |
| BactD24560/CDS/CDS                      | 3.0   | 0.5  | 27.2 | G | COG4632                                         | Exopolysaccharide biosynthesis protein related to N-acetylglucosamine-1-phosphodiester alpha-N-acetylglucosaminidase                                                                                                                                                                       |
| TS28Rum07535/CDS/CDS                    | 6.0   | 1.0  | 27.2 | G | COG4468                                         | Galactose-1-phosphate uridylyltransferase                                                                                                                                                                                                                                                  |
| Bova1915/CDS/CDS                        | 6.0   | 1.0  | 27.2 | G | COG1904                                         | Glucuronate isomerase                                                                                                                                                                                                                                                                      |
| TS29Fae08908/CDS/CDS                    | 3.0   | 0.5  | 27.2 | G | COG1925                                         | Phosphotransferase system, HPr-related proteins                                                                                                                                                                                                                                            |
| BFnctc3537/CDS 6-phosphofructokinase    | 3.0   | 0.5  | 27.2 | G | COG0205                                         | 6-phosphofructokinase                                                                                                                                                                                                                                                                      |
| TS28Rum16436/CDS/CDS                    | 3.0   | 0.5  | 27.2 | G | COG0366                                         | Glucosidases                                                                                                                                                                                                                                                                               |
| BactD24420/CDS/CDS                      | 3.0   | 0.5  | 27.2 | G | COG3717                                         | 5-keto 4-deoxyuronate isomerase                                                                                                                                                                                                                                                            |
| TS28Dori1342/CDS/CDS                    | 6.0   | 1.0  | 27.2 | G | COG1653                                         | ABC-type sugar transport system, periplasmic component                                                                                                                                                                                                                                     |
| Svar1346/CDS/CDS                        | 6.0   | 1.0  | 27.0 | G | COG0574/COG1080 <br>COG4668/COG3412 <br>COG2190 | Phosphoenolpyruvate synthase/pyruvate phosphate dikinase Phosphoenolpyruvate-protein kinase (PTS system EI component in bacteria) Mannitol/fructose-specific phosphotransferase system, IIA domain Uncharacterized protein conserved in bacterial Phosphotransferase system IIA components |
| TS28Fae09505/CDS/CDS                    | 14.8  | 2.5  | 26.8 | G | COG3839                                         | ABC-type sugar transport systems, ATPase components                                                                                                                                                                                                                                        |
| Bfin0903/CDS/CDS                        | 8.0   | 1.4  | 25.8 | G | COG1830                                         | DhnA-type fructose-1,6-bisphosphate aldolase and related enzymes                                                                                                                                                                                                                           |
| Bthe3732371/CDS/CDS                     | 8.0   | 1.4  | 25.8 | G | COG1830                                         | DhnA-type fructose-1,6-bisphosphate aldolase and related enzymes                                                                                                                                                                                                                           |
| BactD12630/CDS/CDS                      | 8.0   | 1.4  | 25.8 | G | COG1830                                         | DhnA-type fructose-1,6-bisphosphate aldolase and related enzymes                                                                                                                                                                                                                           |
| Bthe7331681/CDS/CDS                     | 8.0   | 1.4  | 25.8 | G | COG1830                                         | DhnA-type fructose-1,6-bisphosphate aldolase and related enzymes                                                                                                                                                                                                                           |
| Robe1823/CDS/CDS                        | 5.7   | 1.0  | 25.7 | G | COG2017                                         | Galactose mutarotase and related enzymes                                                                                                                                                                                                                                                   |
| Buni1688/CDS/CDS                        | 8.5   | 1.5  | 25.7 | G | COG0363                                         | 6-phosphogluconolactonase/Glucosamine-6-phosphate isomerase/deaminase                                                                                                                                                                                                                      |
| TS28Fae21379/CDS/CDS                    | 67.7  | 12.0 | 25.6 | G | COG2182                                         | Maltose-binding periplasmic proteins/domains                                                                                                                                                                                                                                               |
| TS28Fae21323/CDS/CDS                    | 134.8 | 24.0 | 25.5 | G | COG1653                                         | ABC-type sugar transport system, periplasmic component                                                                                                                                                                                                                                     |
| TS29Rum18310/CDS/CDS                    | 95.3  | 17.0 | 25.5 | G | COG1879                                         | ABC-type sugar transport system, periplasmic component                                                                                                                                                                                                                                     |
| TS29Rum13498/CDS/CDS                    | 98.0  | 17.5 | 25.4 | G | COG0057                                         | Glyceraldehyde-3-phosphate dehydrogenase/erythrose-4-phosphate dehydrogenase                                                                                                                                                                                                               |
| TS28Rum01594/CDS/CDS                    | 98.0  | 17.5 | 25.4 | G | COG0057                                         | Glyceraldehyde-3-phosphate dehydrogenase/erythrose-4-phosphate dehydrogenase                                                                                                                                                                                                               |
| TS28Fae11115/CDS/CDS                    | 3.7   | 0.7  | 25.0 | G | COG1472                                         | Beta-glucosidase-related glucosidases                                                                                                                                                                                                                                                      |
| TS28Eub4465/CDS/CDS                     | 5.5   | 1.0  | 25.0 | G | COG3839                                         | ABC-type sugar transport systems, ATPase components                                                                                                                                                                                                                                        |
| TS28Fae16913/CDS/CDS                    | 16.4  | 3.0  | 24.8 | G | COG1653                                         | ABC-type sugar transport system, periplasmic component                                                                                                                                                                                                                                     |
| TS28Fae12308/CDS/CDS                    | 21.8  | 4.0  | 24.8 | G | COG1653                                         | ABC-type sugar transport system, periplasmic component                                                                                                                                                                                                                                     |
| Bspl162927/CDS/CDS                      | 1.1   | 0.2  | 24.7 | G | COG0205                                         | 6-phosphofructokinase                                                                                                                                                                                                                                                                      |
| Bple2834/CDS/CDS                        | 1.1   | 0.2  | 24.7 | G | COG0205                                         | 6-phosphofructokinase                                                                                                                                                                                                                                                                      |
| Bdor3667/CDS/CDS                        | 1.1   | 0.2  | 24.7 | G | COG0205                                         | 6-phosphofructokinase                                                                                                                                                                                                                                                                      |
| BT1102/CDS 6-phosphofructokinase        | 1.1   | 0.2  | 24.7 | G | COG0205                                         | 6-phosphofructokinase                                                                                                                                                                                                                                                                      |
| Pmer3618/CDS/CDS                        | 1.1   | 0.2  | 24.7 | G | COG0205                                         | 6-phosphofructokinase                                                                                                                                                                                                                                                                      |
| TS29Bac12223/CDS/CDS                    | 5.4   | 1.0  | 24.4 | G | COG3250                                         | Beta-galactosidase/beta-glucuronidase                                                                                                                                                                                                                                                      |
| Robe3781/CDS/CDS                        | 45.6  | 8.5  | 24.3 | G | COG1653                                         | ABC-type sugar transport system, periplasmic component                                                                                                                                                                                                                                     |
| Robe3232/CDS/CDS                        | 37.5  | 7.0  | 24.3 | G | COG1879                                         | ABC-type sugar transport system, periplasmic component                                                                                                                                                                                                                                     |
| TS28Fae16880/CDS/CDS                    | 41.6  | 7.8  | 24.1 | G | COG1879/COG4213                                 | ABC-type sugar transport system, periplasmic component ABC-type xylose transport system, periplasmic component                                                                                                                                                                             |
| TS28Rum02361/CDS/CDS                    | 21.0  | 4.0  | 23.9 | G | COG1129                                         | ABC-type sugar transport system, ATPase component                                                                                                                                                                                                                                          |
| Bthe3735712/CDS/CDS                     | 1.8   | 0.3  | 23.8 | G | COG1482                                         | Phosphomannose isomerase                                                                                                                                                                                                                                                                   |
| Bspl164391/CDS/CDS                      | 1.8   | 0.3  | 23.8 | G | COG1482                                         | Phosphomannose isomerase                                                                                                                                                                                                                                                                   |
| Bthe7334894/CDS/CDS                     | 1.8   | 0.3  | 23.8 | G | COG1482                                         | Phosphomannose isomerase                                                                                                                                                                                                                                                                   |
| TS28Rum15519/CDS/CDS                    | 20.8  | 4.0  | 23.6 | G | COG1070/COG4806                                 | Sugar (pentulose and hexulose) kinases L-rhamnose isomerase                                                                                                                                                                                                                                |
| TS29Fae06979/CDS/CDS                    | 2.6   | 0.5  | 23.6 | G | COG2723                                         | Beta-glucosidase/6-phospho-beta-glucosidase/beta-galactosidase                                                                                                                                                                                                                             |
| Bfra31122209/CDS/CDS                    | 4.3   | 0.8  | 23.6 | G | COG2407                                         | L-fucose isomerase and related proteins                                                                                                                                                                                                                                                    |
| TS28Fae12935/CDS/CDS                    | 10.3  | 2.0  | 23.5 | G | COG0366/COG3281 <br>COG1640                     | Glucosidases Uncharacterized protein, probably involved in trehalose biosynthesis 4-alpha-glucanotransferase                                                                                                                                                                               |
| ShigspD90137/CDS/CDS                    | 1.7   | 0.3  | 22.7 | G | COG4806                                         | L-rhamnose isomerase                                                                                                                                                                                                                                                                       |
| TS28Bac5535/CDS/CDS                     | 1.7   | 0.3  | 22.7 | G | COG0297                                         | Glycogen synthase                                                                                                                                                                                                                                                                          |
| RintL10186/CDS/CDS                      | 5.0   | 1.0  | 22.7 | G | COG1175                                         | ABC-type sugar transport systems, permease components                                                                                                                                                                                                                                      |
| TS28RumUnc1503/CDS/CDS                  | 5.0   | 1.0  | 22.7 | G | COG2211                                         | Na+/melibiose symporter and related transporters                                                                                                                                                                                                                                           |
| Rtor1790/CDS/CDS                        | 5.0   | 1.0  | 22.7 | G | COG1879/COG4213                                 | ABC-type sugar transport system, periplasmic component ABC-type xylose transport system, periplasmic component                                                                                                                                                                             |
| TS28Rum02515/CDS/CDS                    | 2.5   | 0.5  | 22.7 | G | COG0366                                         | Glucosidases                                                                                                                                                                                                                                                                               |
| Csci1385/CDS/CDS                        | 5.0   | 1.0  | 22.7 | G | COG1820                                         | N-acetylglucosamine-6-phosphate deacetylase                                                                                                                                                                                                                                                |
| TS28Eub0190/CDS/CDS                     | 2.5   | 0.5  | 22.7 | G | COG1653                                         | ABC-type sugar transport system, periplasmic component                                                                                                                                                                                                                                     |
| TS28Rum16245/CDS/CDS                    | 5.0   | 1.0  | 22.7 | G | COG1482                                         | Phosphomannose isomerase                                                                                                                                                                                                                                                                   |
| Cbol4823/CDS/CDS                        | 5.0   | 1.0  | 22.7 | G | COG2376                                         | Dihydroxyacetone kinase                                                                                                                                                                                                                                                                    |
| RintL13599/CDS/CDS                      | 5.0   | 1.0  | 22.7 | G | COG2182                                         | Maltose-binding periplasmic proteins/domains                                                                                                                                                                                                                                               |
| Rtor1784/CDS/CDS                        | 12.5  | 2.5  | 22.7 | G | COG1129                                         | ABC-type sugar transport system, ATPase component                                                                                                                                                                                                                                          |
| TS28Rum06501/CDS/CDS                    | 12.5  | 2.5  | 22.7 | G | COG1129                                         | ABC-type sugar transport system, ATPase component                                                                                                                                                                                                                                          |
| Rbro0248/CDS/CDS                        | 7.5   | 1.5  | 22.7 | G | COG3839                                         | ABC-type sugar transport systems, ATPase components                                                                                                                                                                                                                                        |
| BactD12575/CDS/CDS                      | 6.7   | 1.3  | 22.7 | G | COG1472                                         | Beta-glucosidase-related glucosidases                                                                                                                                                                                                                                                      |
| BactD11766/CDS/CDS                      | 5.0   | 1.0  | 22.6 | G | COG0574/COG1080 <br>COG4668                     | Phosphoenolpyruvate synthase/pyruvate phosphate dikinase Phosphoenolpyruvate-protein kinase (PTS system EI component in bacteria) Mannitol/fructose-specific phosphotransferase system, IIA domain                                                                                         |
| BactD21441/CDS/CDS                      | 4.0   | 0.8  | 22.0 | G | COG0191                                         | Fructose/tagatose bisphosphate aldolase                                                                                                                                                                                                                                                    |
| FpraM2122449/CDS/CDS                    | 2.4   | 0.5  | 21.9 | G | COG0296                                         | 1,4-alpha-glucan branching enzyme                                                                                                                                                                                                                                                          |
| Caer2021/CDS/CDS                        | 33.8  | 7.0  | 21.9 | G | COG0057                                         | Glyceraldehyde-3-phosphate dehydrogenase/erythrose-4-phosphate dehydrogenase                                                                                                                                                                                                               |
| TS28Fae16502/CDS/CDS                    | 14.3  | 3.0  | 21.6 | G | COG1925                                         | Phosphotransferase system, HPr-related proteins                                                                                                                                                                                                                                            |
| TS29Fae06725/CDS/CDS                    | 216.2 | 46.0 | 21.3 | G | COG2182                                         | Maltose-binding periplasmic proteins/domains                                                                                                                                                                                                                                               |
| BLD0895/CDS Alpha-L-arabinofuranosidase | 2.3   | 0.5  | 21.2 | G | COG3534                                         | Alpha-L-arabinofuranosidase                                                                                                                                                                                                                                                                |

|                                            |       |      |      |   |                                 |                                                                                                                                                                                                                                                                          |
|--------------------------------------------|-------|------|------|---|---------------------------------|--------------------------------------------------------------------------------------------------------------------------------------------------------------------------------------------------------------------------------------------------------------------------|
| BactD11982 CDS CDS                         | 7.0   | 1.5  | 21.2 | G | COG0176 COG0166                 | Transaldolase Glucose-6-phosphate isomerase                                                                                                                                                                                                                              |
| TS28Bac1052 CDS CDS                        | 2.3   | 0.5  | 21.2 | G | COG1109                         | Phosphomannomutase                                                                                                                                                                                                                                                       |
| Robe2835 CDS CDS                           | 20.5  | 4.5  | 20.7 | G | COG0057                         | Glyceraldehyde-3-phosphate dehydrogenase/erythrose-4-phosphate dehydrogenase                                                                                                                                                                                             |
| Bfin1256 CDS CDS                           | 13.6  | 3.0  | 20.6 | G | COG0057                         | Glyceraldehyde-3-phosphate dehydrogenase/erythrose-4-phosphate dehydrogenase                                                                                                                                                                                             |
| TS28Rum15751 CDS CDS                       | 25.0  | 5.5  | 20.6 | G | COG1653                         | ABC-type sugar transport system, periplasmic component                                                                                                                                                                                                                   |
| BactD23946 CDS CDS                         | 13.6  | 3.0  | 20.6 | G | COG3250                         | Beta-galactosidase/beta-glucuronidase                                                                                                                                                                                                                                    |
| Buni2565 CDS CDS                           | 1.5   | 0.3  | 20.4 | G | COG3250                         | Beta-galactosidase/beta-glucuronidase                                                                                                                                                                                                                                    |
| CspM6211453 CDS CDS                        | 9.0   | 2.0  | 20.4 | G | COG0448                         | ADP-glucose pyrophosphorylase                                                                                                                                                                                                                                            |
| TS28Fae22183 CDS CDS                       | 4.5   | 1.0  | 20.4 | G | COG1904                         | Glucuronate isomerase                                                                                                                                                                                                                                                    |
| TS28Rum15546 CDS CDS                       | 71.8  | 16.0 | 20.4 | G | COG1879 COG1172 COG4158         | ABC-type sugar transport system, periplasmic component Ribose/xylose/arabinose/galactoside ABC-type transport systems, permease components Predicted ABC-type sugar transport system, permease component                                                                 |
| TS29Rum19417 CDS CDS                       | 246.0 | 55.0 | 20.3 | G | COG1653                         | ABC-type sugar transport system, periplasmic component                                                                                                                                                                                                                   |
| TS28Rum03672 CDS CDS                       | 38.0  | 8.5  | 20.3 | G | COG3250 COG3525                 | Beta-galactosidase/beta-glucuronidase N-acetyl-beta-hexosaminidase                                                                                                                                                                                                       |
| TS29Rum03526 CDS CDS                       | 4.3   | 1.0  | 19.7 | G | COG1653                         | ABC-type sugar transport system, periplasmic component                                                                                                                                                                                                                   |
| Clen1248 CDS CDS                           | 4.3   | 1.0  | 19.7 | G | COG1175                         | ABC-type sugar transport systems, permease components                                                                                                                                                                                                                    |
| TS28Fae01078 CDS CDS                       | 13.0  | 3.0  | 19.7 | G | COG1472                         | Beta-glucosidase-related glycosidases                                                                                                                                                                                                                                    |
| BactD13714 CDS CDS                         | 6.5   | 1.5  | 19.7 | G | COG1472                         | Beta-glucosidase-related glycosidases                                                                                                                                                                                                                                    |
| TS28Eub5098 CDS CDS                        | 4.3   | 1.0  | 19.7 | G | COG2182                         | Maltose-binding periplasmic proteins/domains                                                                                                                                                                                                                             |
| TS29Bac07451 CDS CDS                       | 2.2   | 0.5  | 19.7 | G | COG0296                         | 1,4-alpha-glucan branching enzyme                                                                                                                                                                                                                                        |
| BDI0208 CDS 4-alpha-glucanotransferase     | 43.0  | 10.0 | 19.5 | G | COG3408                         | Glycogen debranching enzyme                                                                                                                                                                                                                                              |
| Buni1126 CDS CDS                           | 24.4  | 5.7  | 19.5 | G | COG0366 COG1523 COG3281         | Glycosidases Type II secretory pathway, pullulanase PuIA and related glycosidases Uncharacterized protein, probably involved in trehalose biosynthesis                                                                                                                   |
| TS28Rum15491 CDS CDS                       | 8.5   | 2.0  | 19.4 | G | COG3839                         | ABC-type sugar transport systems, ATPase components                                                                                                                                                                                                                      |
| TS29Fae07101 CDS CDS                       | 4.3   | 1.0  | 19.3 | G | COG0149                         | Triosephosphate isomerase                                                                                                                                                                                                                                                |
| Buni3019 CDS CDS                           | 8.5   | 2.0  | 19.3 | G | COG0696                         | Phosphoglyceromutase                                                                                                                                                                                                                                                     |
| Rgna1670 CDS CDS                           | 10.5  | 2.5  | 19.1 | G | COG0057                         | Glyceraldehyde-3-phosphate dehydrogenase/erythrose-4-phosphate dehydrogenase                                                                                                                                                                                             |
| TS28Bac2896 CDS CDS                        | 7.7   | 1.8  | 19.0 | G | COG1472                         | Beta-glucosidase-related glycosidases                                                                                                                                                                                                                                    |
| TS28Rum11756 CDS CDS                       | 14.5  | 3.5  | 18.8 | G | COG1653                         | ABC-type sugar transport system, periplasmic component                                                                                                                                                                                                                   |
| Bxvl0043 CDS CDS                           | 6.2   | 1.5  | 18.7 | G | COG0800                         | 2-keto-3-deoxy-6-phosphogluconate aldolase                                                                                                                                                                                                                               |
| Bxvl0802 CDS CDS                           | 6.2   | 1.5  | 18.7 | G | COG3525                         | N-acetyl-beta-hexosaminidase                                                                                                                                                                                                                                             |
| TS29Rum20911 CDS CDS                       | 68.0  | 17.0 | 18.2 | G | COG0057                         | Glyceraldehyde-3-phosphate dehydrogenase/erythrose-4-phosphate dehydrogenase                                                                                                                                                                                             |
| Bcat0994 CDS CDS                           | 1.0   | 0.3  | 18.2 | G | COG3839                         | ABC-type sugar transport systems, ATPase components                                                                                                                                                                                                                      |
| TS28Fae16440 CDS CDS                       | 4.0   | 1.0  | 18.2 | G | COG0395                         | ABC-type sugar transport system, permease component                                                                                                                                                                                                                      |
| TS28Rum05122 CDS CDS                       | 4.0   | 1.0  | 18.2 | G | COG1879                         | ABC-type sugar transport system, periplasmic component                                                                                                                                                                                                                   |
| TS28Rum00303 CDS CDS                       | 4.0   | 1.0  | 18.2 | G | COG1129                         | ABC-type sugar transport system, ATPase component                                                                                                                                                                                                                        |
| Caer2202 CDS CDS                           | 2.0   | 0.5  | 18.2 | G | COG0395 COG3833                 | ABC-type sugar transport system, permease component ABC-type maltose transport systems, permease component                                                                                                                                                               |
| TS28Fae21898 CDS CDS                       | 4.0   | 1.0  | 18.2 | G | COG0176                         | Transaldolase                                                                                                                                                                                                                                                            |
| Bfyeh463828 CDS 4-alpha-glucanotransferase | 10.0  | 2.5  | 18.2 | G | COG1640 COG3280                 | 4-alpha-glucanotransferase Maltooligosyl trehalose synthase                                                                                                                                                                                                              |
| Casp4832 CDS CDS                           | 4.0   | 1.0  | 18.2 | G | COG1129                         | ABC-type sugar transport system, ATPase component                                                                                                                                                                                                                        |
| BactD11061 CDS CDS                         | 2.0   | 0.5  | 18.2 | G | COG2730                         | Endoglucanase                                                                                                                                                                                                                                                            |
| TS28Fae18738 CDS CDS                       | 4.0   | 1.0  | 18.2 | G | COG3412 COG1925                 | Uncharacterized protein conserved in bacteria Phosphotransferase system, HPr-related proteins                                                                                                                                                                            |
| TS28Dor0052 CDS CDS                        | 4.0   | 1.0  | 18.2 | G | COG3010                         | Putative N-acetylmannosamine-6-phosphate epimerase                                                                                                                                                                                                                       |
| TS28Rum11685 CDS CDS                       | 4.0   | 1.0  | 18.2 | G | COG1653                         | ABC-type sugar transport system, periplasmic component                                                                                                                                                                                                                   |
| RintL12354 CDS CDS                         | 4.0   | 1.0  | 18.2 | G | COG1554 COG1877                 | Trehalose and maltose hydrolases (possible phosphorylases) Trehalose-6-phosphatase                                                                                                                                                                                       |
| Hfil0135 CDS CDS                           | 4.0   | 1.0  | 18.2 | G | COG3010                         | Putative N-acetylmannosamine-6-phosphate epimerase                                                                                                                                                                                                                       |
| Bryfor3079 CDS CDS                         | 4.0   | 1.0  | 18.2 | G | COG1472                         | Beta-glucosidase-related glycosidases                                                                                                                                                                                                                                    |
| Dlon1532 CDS CDS                           | 2.0   | 0.5  | 18.2 | G | COG4468                         | Galactose-1-phosphate uridylyltransferase                                                                                                                                                                                                                                |
| Buni0258 CDS CDS                           | 4.0   | 1.0  | 18.2 | G | COG3250                         | Beta-galactosidase/beta-glucuronidase                                                                                                                                                                                                                                    |
| Buni2250 CDS CDS                           | 3.3   | 0.8  | 18.2 | G | COG3250                         | Beta-galactosidase/beta-glucuronidase                                                                                                                                                                                                                                    |
| TS28Bac6120 CDS CDS                        | 1.3   | 0.3  | 18.2 | G | COG3250                         | Beta-galactosidase/beta-glucuronidase                                                                                                                                                                                                                                    |
| BactD21456 CDS CDS                         | 4.0   | 1.0  | 18.1 | G | COG0126 COG0149                 | 3-phosphoglycerate kinase Triosephosphate isomerase                                                                                                                                                                                                                      |
| Buni1068 CDS CDS                           | 25.5  | 6.5  | 17.8 | G | COG0365                         | 6-phosphogluconolactonase Glucosamine-6-phosphate isomerase/deaminase                                                                                                                                                                                                    |
| TS28Bac1544 CDS CDS                        | 15.0  | 3.8  | 17.8 | G | COG3934                         | Endo-beta-mannanase                                                                                                                                                                                                                                                      |
| Buni0300 CDS CDS                           | 15.0  | 3.8  | 17.8 | G | COG3934                         | Endo-beta-mannanase                                                                                                                                                                                                                                                      |
| TS29Fae06921 CDS CDS                       | 3.9   | 1.0  | 17.7 | G | COG1109                         | Phosphomannomutase                                                                                                                                                                                                                                                       |
| TS29Rum10632 CDS CDS                       | 19.5  | 5.0  | 17.7 | G | COG1879                         | ABC-type sugar transport system, periplasmic component                                                                                                                                                                                                                   |
| TS29Cio4778 CDS CDS                        | 35.0  | 9.0  | 17.7 | G | COG1879                         | ABC-type sugar transport system, periplasmic component                                                                                                                                                                                                                   |
| Buni3322 CDS CDS                           | 5.8   | 1.5  | 17.7 | G | COG1109                         | Phosphomannomutase                                                                                                                                                                                                                                                       |
| TS28Bif4566 CDS CDS                        | 13.4  | 3.5  | 17.4 | G | COG0021                         | Transketolase                                                                                                                                                                                                                                                            |
| Buni0791 CDS CDS                           | 3.8   | 1.0  | 17.4 | G | COG1472                         | Beta-glucosidase-related glycosidases                                                                                                                                                                                                                                    |
| FpraM2122373 CDS CDS                       | 5.8   | 1.5  | 17.4 | G | COG1879 COG1172 COG4158 COG4211 | ABC-type sugar transport system, periplasmic component Ribose/xylose/arabinose/galactoside ABC-type transport systems, permease components Predicted ABC-type sugar transport system, permease component ABC-type glucose/galactose transport system, permease component |
| Buni0659 CDS CDS                           | 3.8   | 1.0  | 17.3 | G | COG0205                         | 6-phosphofructokinase                                                                                                                                                                                                                                                    |
| TS28Fae01830 CDS CDS                       | 370.0 | 97.0 | 17.3 | G | COG1653                         | ABC-type sugar transport system, periplasmic component                                                                                                                                                                                                                   |
| Robe3281 CDS CDS                           | 19.0  | 5.0  | 17.3 | G | COG0235                         | Ribulose-5-phosphate 4-epimerase and related epimerases and aldolases                                                                                                                                                                                                    |
| TS28Rum01682 CDS CDS                       | 16.9  | 4.5  | 17.0 | G | COG0057                         | Glyceraldehyde-3-phosphate dehydrogenase/erythrose-4-phosphate dehydrogenase                                                                                                                                                                                             |
| Dfor1934 CDS CDS                           | 33.7  | 9.0  | 17.0 | G | COG1879                         | ABC-type sugar transport system, periplasmic component                                                                                                                                                                                                                   |
| Bxvl3893 CDS CDS                           | 3.1   | 0.8  | 17.0 | G | COG0365                         | 6-phosphogluconolactonase Glucosamine-6-phosphate isomerase/deaminase                                                                                                                                                                                                    |
| TS28Rum02685 CDS CDS                       | 43.0  | 11.5 | 17.0 | G | COG1653                         | ABC-type sugar transport system, periplasmic component                                                                                                                                                                                                                   |
| Robe3782 CDS CDS                           | 7.4   | 2.0  | 16.9 | G | COG1175                         | ABC-type sugar transport systems, permease components                                                                                                                                                                                                                    |
| FpraM2121175 CDS CDS                       | 88.8  | 24.0 | 16.8 | G | COG1653                         | ABC-type sugar transport system, periplasmic component                                                                                                                                                                                                                   |
| Bfyeh463252 CDS phosphoglyceromutase       | 1.8   | 0.5  | 16.6 | G | COG0588                         | Phosphoglycerate mutase 1                                                                                                                                                                                                                                                |
| TS28RumUnc1985 CDS CDS                     | 11.0  | 3.0  | 16.6 | G | COG3957                         | Phosphoketolase                                                                                                                                                                                                                                                          |
| BFnctc3091 CDS phosphoglyceromutase        | 1.8   | 0.5  | 16.6 | G | COG0588                         | Phosphoglycerate mutase 1                                                                                                                                                                                                                                                |
| Anut0302 CDS CDS                           | 22.0  | 6.0  | 16.6 | G | COG1109                         | Phosphomannomutase                                                                                                                                                                                                                                                       |
| TS28Rum12148 CDS CDS                       | 3.7   | 1.0  | 16.6 | G | COG2160                         | L-arabinose isomerase                                                                                                                                                                                                                                                    |
| TS28Eub0950 CDS CDS                        | 1.8   | 0.5  | 16.6 | G | COG0149                         | Triosephosphate isomerase                                                                                                                                                                                                                                                |

|                                            |       |      |      |   |                                         |                                                                                                                                                                                                                                                                                                                               |
|--------------------------------------------|-------|------|------|---|-----------------------------------------|-------------------------------------------------------------------------------------------------------------------------------------------------------------------------------------------------------------------------------------------------------------------------------------------------------------------------------|
| TS28Cl02971 CDS CDS                        | 14.5  | 4.0  | 16.5 | G | COG0574 COG4668 COG1080 COG3412 COG2190 | Phosphoenolpyruvate synthase/pyruvate phosphate dikinase Mannitol/fructose-specific phosphotransferase system, IIA domain Phosphoenolpyruvate-protein kinase (PTS system EI component in bacteria) Uncharacterized protein conserved in bacteria Phosphotransferase system IIA components                                     |
| Bxyl2948 CDS CDS                           | 4.7   | 1.3  | 15.9 | G | COG3775                                 | Phosphotransferase system, galactitol-specific IIC component                                                                                                                                                                                                                                                                  |
| Cbol4937 CDS CDS                           | 7.0   | 2.0  | 15.9 | G | COG1129                                 | ABC-type sugar transport system, ATPase component                                                                                                                                                                                                                                                                             |
| TS28Dor0107 CDS CDS                        | 14.0  | 4.0  | 15.9 | G | COG1653                                 | ABC-type sugar transport system, periplasmic component                                                                                                                                                                                                                                                                        |
| Cbol0799 CDS CDS                           | 7.0   | 2.0  | 15.9 | G | COG1129                                 | ABC-type sugar transport system, ATPase component                                                                                                                                                                                                                                                                             |
| Bova0285 CDS CDS                           | 3.5   | 1.0  | 15.7 | G | COG0363                                 | 6-phosphogluconolactonase/Glucosamine-6-phosphate isomerase/deaminase                                                                                                                                                                                                                                                         |
| FpraM2121630 CDS CDS                       | 8.6   | 2.5  | 15.6 | G | COG1653                                 | ABC-type sugar transport system, periplasmic component                                                                                                                                                                                                                                                                        |
| TS28Fae13618 CDS CDS                       | 6.8   | 2.0  | 15.5 | G | COG1904                                 | Glucuronate isomerase                                                                                                                                                                                                                                                                                                         |
| FpraM2122294 CDS CDS                       | 23.8  | 7.0  | 15.5 | G | COG1653                                 | ABC-type sugar transport system, periplasmic component                                                                                                                                                                                                                                                                        |
| Dfor2293 CDS CDS                           | 17.0  | 5.0  | 15.4 | G | COG0574 COG1080 COG4668 COG3412         | Phosphoenolpyruvate synthase/pyruvate phosphate dikinase Phosphoenolpyruvate-protein kinase (PTS system EI component in bacteria) Mannitol/fructose-specific phosphotransferase system, IIA domain Uncharacterized protein conserved in bacteria                                                                              |
| BactD12393 CDS CDS                         | 1.7   | 0.5  | 15.3 | G | COG4833                                 | Predicted glycosyl hydrolase                                                                                                                                                                                                                                                                                                  |
| TS28Fae14035 CDS CDS                       | 15.1  | 4.5  | 15.3 | G | COG0166 COG0176                         | Glucose-6-phosphate isomerase Transaldolase                                                                                                                                                                                                                                                                                   |
| Bxyl0801 CDS CDS                           | 1.7   | 0.5  | 15.1 | G | COG3525                                 | N-acetyl-beta-hexosaminidase                                                                                                                                                                                                                                                                                                  |
| TS28Cl06640 CDS CDS                        | 3.3   | 1.0  | 15.1 | G | COG1175                                 | ABC-type sugar transport systems, permease components                                                                                                                                                                                                                                                                         |
| TS28Bac1652 CDS CDS                        | 3.3   | 1.0  | 15.1 | G | COG1472                                 | Beta-galactosidase-related glycosidases                                                                                                                                                                                                                                                                                       |
| Cste1898 CDS CDS                           | 3.3   | 1.0  | 15.1 | G | COG0057                                 | Glyceraldehyde-3-phosphate dehydrogenase/erythrose-4-phosphate dehydrogenase                                                                                                                                                                                                                                                  |
| TS28Fae21445 CDS CDS                       | 5.0   | 1.5  | 15.1 | G | COG1109                                 | Phosphomannomutase                                                                                                                                                                                                                                                                                                            |
| TS29Rum00102 CDS CDS                       | 320.6 | 98.0 | 14.9 | G | COG2407                                 | L-fucose isomerase and related proteins                                                                                                                                                                                                                                                                                       |
| Bxyl4452 CDS CDS                           | 5.5   | 1.7  | 14.8 | G | COG4833                                 | Predicted glycosyl hydrolase                                                                                                                                                                                                                                                                                                  |
| TS29Rum00093 CDS CDS                       | 156.9 | 48.0 | 14.8 | G | COG1879 COG4214 COG1172 COG4211 COG4158 | ABC-type sugar transport system, periplasmic component ABC-type xylose transport system, permease component Ribose/xylose/arabinose/galactoside ABC-type transport systems, permease components ABC-type glucose/galactose transport system, permease component Predicted ABC-type sugar transport system, permease component |
| BactD12573 CDS CDS                         | 3.3   | 1.0  | 14.8 | G | COG1501                                 | Alpha-galactosidases, family 31 of glycosyl hydrolases                                                                                                                                                                                                                                                                        |
| Clepl1252 CDS CDS                          | 6.5   | 2.0  | 14.8 | G | COG1082                                 | Sugar phosphate isomerases/epimerases                                                                                                                                                                                                                                                                                         |
| Rtor0675 CDS CDS                           | 6.5   | 2.0  | 14.8 | G | COG0366 COG1640 COG3281                 | Glycosidases 4-alpha-glucanotransferase Uncharacterized protein, probably involved in trehalose biosynthesis                                                                                                                                                                                                                  |
| Bum11028 CDS CDS                           | 4.8   | 1.5  | 14.6 | G | COG0738                                 | Fucose permease                                                                                                                                                                                                                                                                                                               |
| TS29Bac00498 CDS CDS                       | 27.3  | 8.5  | 14.6 | G | COG0148                                 | Enolase                                                                                                                                                                                                                                                                                                                       |
| TS28Fae19105 CDS CDS                       | 6.4   | 2.0  | 14.6 | G | COG0297                                 | Glycogen synthase                                                                                                                                                                                                                                                                                                             |
| TS28Fae19101 CDS CDS                       | 6.3   | 2.0  | 14.3 | G | COG0296                                 | 1,4-alpha-glucan branching enzyme                                                                                                                                                                                                                                                                                             |
| Rbro0630 CDS CDS                           | 7.8   | 2.5  | 14.2 | G | COG2182                                 | Maltose-binding periplasmic proteins/domains                                                                                                                                                                                                                                                                                  |
| TS29Rum17970 CDS CDS                       | 50.0  | 16.0 | 14.2 | G | COG1653                                 | ABC-type sugar transport system, periplasmic component                                                                                                                                                                                                                                                                        |
| Bum1140 CDS CDS                            | 35.8  | 11.5 | 14.1 | G | COG0148                                 | Enolase                                                                                                                                                                                                                                                                                                                       |
| Bxyl3092 CDS CDS                           | 13.9  | 4.5  | 14.1 | G | COG0057                                 | Glyceraldehyde-3-phosphate dehydrogenase/erythrose-4-phosphate dehydrogenase                                                                                                                                                                                                                                                  |
| BactD12720 CDS CDS                         | 13.9  | 4.5  | 14.1 | G | COG0057                                 | Glyceraldehyde-3-phosphate dehydrogenase/erythrose-4-phosphate dehydrogenase                                                                                                                                                                                                                                                  |
| Csci1941 CDS CDS                           | 1.0   | 0.3  | 13.6 | G | COG1109                                 | Phosphomannomutase                                                                                                                                                                                                                                                                                                            |
| Bova0190 CDS CDS                           | 1.0   | 0.3  | 13.6 | G | COG2942                                 | N-acetyl-D-glucosamine 2-epimerase                                                                                                                                                                                                                                                                                            |
| Bfra31121655 CDS CDS                       | 1.0   | 0.3  | 13.6 | G | COG0191                                 | Fructose/tagatose biphosphate aldolase                                                                                                                                                                                                                                                                                        |
| BactD23173 CDS CDS                         | 1.0   | 0.3  | 13.6 | G | COG3250                                 | Beta-galactosidase/beta-glucuronidase                                                                                                                                                                                                                                                                                         |
| Ccom0503 CDS CDS                           | 21.0  | 7.0  | 13.6 | G | COG3250                                 | Beta-galactosidase/beta-glucuronidase                                                                                                                                                                                                                                                                                         |
| BactD21080 CDS CDS                         | 1.5   | 0.5  | 13.6 | G | COG0176 COG0166                         | Transaldolase/Glucose-6-phosphate isomerase                                                                                                                                                                                                                                                                                   |
| TS28Dor0455 CDS CDS                        | 3.0   | 1.0  | 13.6 | G | COG1653                                 | ABC-type sugar transport system, periplasmic component                                                                                                                                                                                                                                                                        |
| TS28Fae16439 CDS CDS                       | 3.0   | 1.0  | 13.6 | G | COG1653                                 | ABC-type sugar transport system, periplasmic component                                                                                                                                                                                                                                                                        |
| Hfil2990 CDS CDS                           | 3.0   | 1.0  | 13.6 | G | COG0153                                 | Galactokinase                                                                                                                                                                                                                                                                                                                 |
| TS28Rum02438 CDS CDS                       | 1.5   | 0.5  | 13.6 | G | COG1129                                 | ABC-type sugar transport system, ATPase component                                                                                                                                                                                                                                                                             |
| TS28Met1583 CDS CDS                        | 3.0   | 1.0  | 13.6 | G | COG3635                                 | Predicted phosphoglycerate mutase, AP superfamily                                                                                                                                                                                                                                                                             |
| Bxyl4248 CDS CDS                           | 3.0   | 1.0  | 13.6 | G | COG3669                                 | Alpha-L-fucosidase                                                                                                                                                                                                                                                                                                            |
| Rumhyd1082 CDS CDS                         | 3.0   | 1.0  | 13.6 | G | COG1175 COG2182                         | ABC-type sugar transport systems, permease components Maltose-binding periplasmic proteins/domains                                                                                                                                                                                                                            |
| BactD22086 CDS CDS                         | 0.6   | 0.2  | 13.6 | G | COG4124                                 | Beta-mannanase                                                                                                                                                                                                                                                                                                                |
| BFnctc1811 CDS beta-N-acetylhexosaminidase | 3.0   | 1.0  | 13.6 | G | COG3525                                 | N-acetyl-beta-hexosaminidase                                                                                                                                                                                                                                                                                                  |
| TS28Fae16441 CDS CDS                       | 3.0   | 1.0  | 13.6 | G | COG1175 COG4209                         | ABC-type sugar transport systems, permease components ABC-type polysaccharide transport system, permease component                                                                                                                                                                                                            |
| Dlon1193 CDS CDS                           | 3.0   | 1.0  | 13.6 | G | COG3534                                 | Alpha-L-arabinofuranosidase                                                                                                                                                                                                                                                                                                   |
| TS28Fae08223 CDS CDS                       | 3.0   | 1.0  | 13.6 | G | COG1175 COG4209                         | ABC-type sugar transport systems, permease components ABC-type polysaccharide transport system, permease component                                                                                                                                                                                                            |
| Rumhvd2933 CDS CDS                         | 3.0   | 1.0  | 13.6 | G | COG0296                                 | 1,4-alpha-glucan branching enzyme                                                                                                                                                                                                                                                                                             |
| CspM6212778 CDS CDS                        | 3.0   | 1.0  | 13.6 | G | COG0296                                 | 1,4-alpha-glucan branching enzyme                                                                                                                                                                                                                                                                                             |
| TS28Rum10081 CDS CDS                       | 3.0   | 1.0  | 13.6 | G | COG0126 COG0149                         | 3-phosphoglycerate kinase Triosephosphate isomerase                                                                                                                                                                                                                                                                           |
| TS28Aii2049 CDS CDS                        | 3.0   | 1.0  | 13.6 | G | COG0191                                 | Fructose/tagatose biphosphate aldolase                                                                                                                                                                                                                                                                                        |
| Rumhyd1270 CDS CDS                         | 6.0   | 2.0  | 13.6 | G | COG0524 COG0800 COG3892 COG3718         | Sugar kinases, ribokinase family 2-keto-3-deoxy-6-phosphogluconate aldolase Uncharacterized protein conserved in bacteria Uncharacterized enzyme involved in inositol metabolism                                                                                                                                              |
| Bova1242 CDS CDS                           | 1.5   | 0.5  | 13.6 | G | COG2160                                 | L-arabinose isomerase                                                                                                                                                                                                                                                                                                         |
| Acac2071 CDS CDS                           | 3.0   | 1.0  | 13.6 | G | COG1082                                 | Sugar phosphate isomerases/epimerases                                                                                                                                                                                                                                                                                         |
| Ccom0201 CDS CDS                           | 3.0   | 1.0  | 13.6 | G | COG0149                                 | Triosephosphate isomerase                                                                                                                                                                                                                                                                                                     |
| Ccom0399 CDS CDS                           | 15.0  | 5.0  | 13.6 | G | COG1653                                 | ABC-type sugar transport system, periplasmic component                                                                                                                                                                                                                                                                        |
| TS28Rum12988 CDS CDS                       | 3.0   | 1.0  | 13.6 | G | COG3525                                 | N-acetyl-beta-hexosaminidase                                                                                                                                                                                                                                                                                                  |
| Cbol4296 CDS CDS                           | 3.0   | 1.0  | 13.6 | G | COG0036                                 | Pentose-5-phosphate-3-epimerase                                                                                                                                                                                                                                                                                               |
| Hfil2940 CDS CDS                           | 3.0   | 1.0  | 13.6 | G | COG1904                                 | Glucuronate isomerase                                                                                                                                                                                                                                                                                                         |
| TS29Rum08265 CDS CDS                       | 3.0   | 1.0  | 13.6 | G | COG0448                                 | ADP-glucose pyrophosphorylase                                                                                                                                                                                                                                                                                                 |
| TS29Rum07113 CDS CDS                       | 9.0   | 3.0  | 13.6 | G | COG3250                                 | Beta-galactosidase/beta-glucuronidase                                                                                                                                                                                                                                                                                         |
| Cbol1155 CDS CDS                           | 9.0   | 3.0  | 13.6 | G | COG1879 COG1172 COG4158 COG4211         | ABC-type sugar transport system, periplasmic component Ribose/xylose/arabinose/galactoside ABC-type transport systems, permease components Predicted ABC-type sugar transport system, permease component ABC-type glucose/galactose transport system, permease component                                                      |
| TS28Rum10535 CDS CDS                       | 19.5  | 6.5  | 13.6 | G | COG1879                                 | ABC-type sugar transport system, periplasmic component                                                                                                                                                                                                                                                                        |
| TS28Fae02318 CDS CDS                       | 9.0   | 3.0  | 13.6 | G | COG1638                                 | TRAP-type C4-dicarboxylate transport system, periplasmic component                                                                                                                                                                                                                                                            |
| BactD11785 CDS CDS                         | 2.0   | 0.7  | 13.6 | G | COG1820                                 | N-acetylglucosamine-6-phosphate deacetylase                                                                                                                                                                                                                                                                                   |
| FpraM2121455 CDS CDS                       | 9.8   | 3.3  | 13.4 | G | COG0205                                 | 6-phosphofructokinase                                                                                                                                                                                                                                                                                                         |

|                                    |       |      |      |   |                                 |                                                                                                                                                                                                                                                  |
|------------------------------------|-------|------|------|---|---------------------------------|--------------------------------------------------------------------------------------------------------------------------------------------------------------------------------------------------------------------------------------------------|
| Rtor1417 CDS CDS                   | 38.3  | 13.0 | 13.4 | G | COG0574 COG1080 COG4668 COG3412 | Phosphoenolpyruvate synthase/pyruvate phosphate dikinase Phosphoenolpyruvate-protein kinase (PTS system EI component in bacteria) Mannitol/fructose-specific phosphotransferase system, IIA domain Uncharacterized protein conserved in bacteria |
| Bfin0907 CDS CDS                   | 5.4   | 1.8  | 13.4 | G | COG0205                         | 6-phosphofructokinase                                                                                                                                                                                                                            |
| Bthe3732367 CDS CDS                | 5.4   | 1.8  | 13.4 | G | COG0205                         | 6-phosphofructokinase                                                                                                                                                                                                                            |
| BactD12634 CDS CDS                 | 5.4   | 1.8  | 13.4 | G | COG0205                         | 6-phosphofructokinase                                                                                                                                                                                                                            |
| Buni0934 CDS CDS                   | 22.0  | 7.5  | 13.3 | G | COG0366 COG3281 COG3408         | Glycosidases Uncharacterized protein, probably involved in trehalose biosynthesis Glycogen debranching enzyme                                                                                                                                    |
| FpraM2121173 CDS CDS               | 7.3   | 2.5  | 13.3 | G | COG1640 COG3280                 | 4-alpha-glucanotransferase Maltooligosyl trehalose synthase                                                                                                                                                                                      |
| TS28Fae10265 CDS CDS               | 7.3   | 2.5  | 13.3 | G | COG1640 COG3280                 | 4-alpha-glucanotransferase Maltooligosyl trehalose synthase                                                                                                                                                                                      |
| BLD0441 CDS Transaldolase          | 1.5   | 0.5  | 13.2 | G | COG0176                         | Transaldolase                                                                                                                                                                                                                                    |
| TS29Rum16940 CDS CDS               | 81.0  | 28.0 | 13.1 | G | COG1082                         | Sugar phosphate isomerases/epimerases                                                                                                                                                                                                            |
| TS28Rum00062 CDS CDS               | 26.0  | 9.0  | 13.1 | G | COG2017                         | Galactose mutarotase and related enzymes                                                                                                                                                                                                         |
| BactD10542 CDS CDS                 | 4.3   | 1.5  | 13.1 | G | COG1904                         | Glucuronate isomerase                                                                                                                                                                                                                            |
| BactD11454 CDS CDS                 | 4.3   | 1.5  | 13.1 | G | COG3717                         | 5-keto 4-deoxyuronate isomerase                                                                                                                                                                                                                  |
| Bxyl4446 CDS CDS                   | 4.3   | 1.5  | 13.0 | G | COG4833                         | Predicted glycosyl hydrolase                                                                                                                                                                                                                     |
| TS29Bac06978 CDS CDS               | 10.4  | 3.7  | 12.9 | G | COG0057                         | Glyceraldehyde-3-phosphate dehydrogenase/erythrose-4-phosphate dehydrogenase                                                                                                                                                                     |
| TS28Fae21419 CDS CDS               | 35.6  | 12.5 | 12.9 | G | COG3839                         | ABC-type sugar transport systems, ATPase components                                                                                                                                                                                              |
| TS29Rum05967 CDS CDS               | 2.8   | 1.0  | 12.9 | G | COG0448                         | ADP-glucose pyrophosphorylase                                                                                                                                                                                                                    |
| FpraM2121364 CDS CDS               | 2.8   | 1.0  | 12.9 | G | COG3250                         | Beta-galactosidase/beta-glucuronidase                                                                                                                                                                                                            |
| TS28Bac1222 CDS CDS                | 5.7   | 2.0  | 12.9 | G | COG2942                         | N-acyl-D-glucosamine 2-epimerase                                                                                                                                                                                                                 |
| TS28Bac1549 CDS CDS                | 2.8   | 1.0  | 12.9 | G | COG3459                         | Cellobiose phosphorylase                                                                                                                                                                                                                         |
| TS29Rum11085 CDS CDS               | 14.0  | 5.0  | 12.7 | G | COG3345                         | Alpha-galactosidase                                                                                                                                                                                                                              |
| TS29Bac08446 CDS CDS               | 43.3  | 15.5 | 12.7 | G | COG0364                         | Glucose-6-phosphate 1-dehydrogenase                                                                                                                                                                                                              |
| TS29Rum03144 CDS CDS               | 75.4  | 27.0 | 12.7 | G | COG1653                         | ABC-type sugar transport system, periplasmic component                                                                                                                                                                                           |
| TS28Bac4132 CDS CDS                | 2.8   | 1.0  | 12.7 | G | COG3250                         | Beta-galactosidase/beta-glucuronidase                                                                                                                                                                                                            |
| TS28Bif2313 CDS CDS                | 8.4   | 3.0  | 12.7 | G | COG3957                         | Phosphoketolase                                                                                                                                                                                                                                  |
| TS29RumUnc0176 CDS CDS             | 139.0 | 50.0 | 12.6 | G | COG1653                         | ABC-type sugar transport system, periplasmic component                                                                                                                                                                                           |
| TS29Rum00091 CDS CDS               | 180.8 | 66.0 | 12.4 | G | COG1879                         | ABC-type sugar transport system, periplasmic component                                                                                                                                                                                           |
| TS29Fae06789 CDS CDS               | 151.3 | 56.0 | 12.3 | G | COG1653                         | ABC-type sugar transport system, periplasmic component                                                                                                                                                                                           |
| Caer1707 CDS CDS                   | 13.5  | 5.0  | 12.3 | G | COG3716                         | Phosphotransferase system, mannose/fructose/N-acetylgalactosamine-specific component IID                                                                                                                                                         |
| Rtor1782 CDS CDS                   | 14.8  | 5.5  | 12.2 | G | COG1879                         | ABC-type sugar transport system, periplasmic component                                                                                                                                                                                           |
| Begg1320 CDS CDS                   | 2.7   | 1.0  | 12.1 | G | COG2730                         | Endoglucanase                                                                                                                                                                                                                                    |
| TS28Fae16912 CDS CDS               | 2.7   | 1.0  | 12.1 | G | COG1175                         | ABC-type sugar transport systems, permease components                                                                                                                                                                                            |
| TS29Bac10809 CDS CDS               | 5.3   | 2.0  | 12.1 | G | COG2942                         | N-acyl-D-glucosamine 2-epimerase                                                                                                                                                                                                                 |
| Bxyl2836 CDS CDS                   | 2.7   | 1.0  | 12.1 | G | COG3537                         | Putative alpha-1,2-mannosidase                                                                                                                                                                                                                   |
| Csci2634 CDS CDS                   | 2.7   | 1.0  | 12.1 | G | COG3839                         | ABC-type sugar transport systems, ATPase components                                                                                                                                                                                              |
| TS28Rum15723 CDS CDS               | 4.0   | 1.5  | 12.1 | G | COG1472                         | Beta-glucosidase-related glycosidases                                                                                                                                                                                                            |
| Cbol5496 CDS CDS                   | 8.0   | 3.0  | 12.1 | G | COG0153                         | Galactokinase                                                                                                                                                                                                                                    |
| Bxyl0308 CDS CDS                   | 1.3   | 0.5  | 12.1 | G | COG2731                         | Beta-galactosidase, beta subunit                                                                                                                                                                                                                 |
| TS29Bac07455 CDS CDS               | 1.3   | 0.5  | 12.1 | G | COG2731                         | Beta-galactosidase, beta subunit                                                                                                                                                                                                                 |
| Bova2264 CDS CDS                   | 1.3   | 0.5  | 12.1 | G | COG3635                         | Predicted phosphoglycerate mutase, AP superfamily                                                                                                                                                                                                |
| TS28Fae10269 CDS CDS               | 34.5  | 13.0 | 12.0 | G | COG1653                         | ABC-type sugar transport system, periplasmic component                                                                                                                                                                                           |
| Bova2416 CDS CDS                   | 10.5  | 4.0  | 11.9 | G | COG0176 COG0166                 | Transaldolase Glucose-6-phosphate isomerase                                                                                                                                                                                                      |
| Cbol1156 CDS CDS                   | 13.0  | 5.0  | 11.8 | G | COG1129                         | ABC-type sugar transport system, ATPase component                                                                                                                                                                                                |
| FpraM2120142 CDS CDS               | 4.8   | 1.8  | 11.8 | G | COG0448                         | ADP-glucose pyrophosphorylase                                                                                                                                                                                                                    |
| TS28Fae00616 CDS CDS               | 20.7  | 8.0  | 11.7 | G | COG1879                         | ABC-type sugar transport system, periplasmic component                                                                                                                                                                                           |
| TS28Fae13793 CDS CDS               | 20.5  | 8.0  | 11.6 | G | COG1653                         | ABC-type sugar transport system, periplasmic component                                                                                                                                                                                           |
| TS28Rum14900 CDS CDS               | 10.2  | 4.0  | 11.5 | G | COG1879 COG1172 COG4158         | ABC-type sugar transport system, periplasmic component Ribose/xylose/arabinose/galactoside ABC-type transport systems, permease components Predicted ABC-type sugar transport system, permease component                                         |
| TS29Bac00648 CDS CDS               | 73.7  | 29.3 | 11.4 | G | COG1640 COG3280                 | 4-alpha-glucanotransferase Maltooligosyl trehalose synthase                                                                                                                                                                                      |
| Bxyl3805 CDS CDS                   | 0.8   | 0.3  | 11.3 | G | COG3507                         | Beta-xylosidase                                                                                                                                                                                                                                  |
| TS28Rum08450 CDS CDS               | 2.5   | 1.0  | 11.3 | G | COG0366                         | Glycosidases                                                                                                                                                                                                                                     |
| Dfor0827 CDS CDS                   | 5.0   | 2.0  | 11.3 | G | COG0448                         | ADP-glucose pyrophosphorylase                                                                                                                                                                                                                    |
| RintL13215 CDS CDS                 | 5.0   | 2.0  | 11.3 | G | COG3250                         | Beta-galactosidase/beta-glucuronidase                                                                                                                                                                                                            |
| Caer2203 CDS CDS                   | 2.5   | 1.0  | 11.3 | G | COG3839                         | ABC-type sugar transport systems, ATPase components                                                                                                                                                                                              |
| Robe3411 CDS CDS                   | 2.5   | 1.0  | 11.3 | G | COG2017                         | Galactose mutarotase and related enzymes                                                                                                                                                                                                         |
| Dfor2481 CDS CDS                   | 12.5  | 5.0  | 11.3 | G | COG1653                         | ABC-type sugar transport system, periplasmic component                                                                                                                                                                                           |
| TS28Rum11755 CDS CDS               | 7.4   | 3.0  | 11.2 | G | COG1175                         | ABC-type sugar transport systems, permease components                                                                                                                                                                                            |
| Rtor0337 CDS CDS                   | 12.3  | 5.0  | 11.2 | G | COG1653                         | ABC-type sugar transport system, periplasmic component                                                                                                                                                                                           |
| TS28Fae00016 CDS CDS               | 43.0  | 17.5 | 11.2 | G | COG0448                         | ADP-glucose pyrophosphorylase                                                                                                                                                                                                                    |
| Bthe3732370 CDS CDS                | 2.3   | 0.9  | 11.1 | G | COG0588                         | Phosphoglycerate mutase 1                                                                                                                                                                                                                        |
| CspM6211083 CDS CDS                | 2.5   | 1.0  | 11.1 | G | COG0057                         | Glyceraldehyde-3-phosphate dehydrogenase/erythrose-4-phosphate dehydrogenase                                                                                                                                                                     |
| TS29RumUnc0460 CDS CDS             | 7.3   | 3.0  | 11.1 | G | COG1175                         | ABC-type sugar transport systems, permease components                                                                                                                                                                                            |
| TS28Rum02551 CDS CDS               | 11.0  | 4.5  | 11.1 | G | COG2706                         | 3-carboxymuconate cyclase                                                                                                                                                                                                                        |
| Robe3235 CDS CDS                   | 12.2  | 5.0  | 11.0 | G | COG1879 COG1172 COG4158         | ABC-type sugar transport system, periplasmic component Ribose/xylose/arabinose/galactoside ABC-type transport systems, permease components Predicted ABC-type sugar transport system, permease component                                         |
| BactD10892 CDS CDS                 | 6.1   | 2.5  | 11.0 | G | COG2721                         | Altronate hydratase                                                                                                                                                                                                                              |
| TS29Rum19002 CDS CDS               | 29.0  | 12.0 | 11.0 | G | COG1879                         | ABC-type sugar transport system, periplasmic component                                                                                                                                                                                           |
| Rena1505 CDS CDS                   | 4.8   | 2.0  | 11.0 | G | COG0448                         | ADP-glucose pyrophosphorylase                                                                                                                                                                                                                    |
| TS28Bac3908 CDS CDS                | 26.5  | 11.0 | 10.9 | G | COG2730                         | Endoglucanase                                                                                                                                                                                                                                    |
| Buni1138 CDS CDS                   | 26.5  | 11.0 | 10.9 | G | COG2730                         | Endoglucanase                                                                                                                                                                                                                                    |
| TS28Fae00017 CDS CDS               | 39.5  | 16.5 | 10.9 | G | COG0448                         | ADP-glucose pyrophosphorylase                                                                                                                                                                                                                    |
| TS28Eub7787 CDS CDS                | 3.6   | 1.5  | 10.8 | G | COG1653                         | ABC-type sugar transport system, periplasmic component                                                                                                                                                                                           |
| Robe3234 CDS CDS                   | 25.0  | 10.5 | 10.8 | G | COG1129                         | ABC-type sugar transport system, ATPase component                                                                                                                                                                                                |
| TS28Fae01251 CDS CDS               | 14.3  | 6.0  | 10.8 | G | COG2190                         | Phosphotransferase system IIA components                                                                                                                                                                                                         |
| Bfin0060 CDS CDS                   | 2.4   | 1.0  | 10.7 | G | COG1472                         | Beta-glucosidase-related glycosidases                                                                                                                                                                                                            |
| TS29RumUnc1456 CDS CDS             | 33.0  | 14.0 | 10.7 | G | COG3839                         | ABC-type sugar transport systems, ATPase components                                                                                                                                                                                              |
| Buni2622 CDS CDS                   | 17.6  | 7.5  | 10.6 | G | COG0057                         | Glyceraldehyde-3-phosphate dehydrogenase/erythrose-4-phosphate dehydrogenase                                                                                                                                                                     |
| TS29Rum00094 CDS CDS               | 148.7 | 63.5 | 10.6 | G | COG1129                         | ABC-type sugar transport system, ATPase component                                                                                                                                                                                                |
| Svar1329 CDS CDS                   | 4.7   | 2.0  | 10.6 | G | COG3507                         | Beta-xylosidase                                                                                                                                                                                                                                  |
| BFvch460380 CDS beta-galactosidase | 3.5   | 1.5  | 10.6 | G | COG3250                         | Beta-galactosidase/beta-glucuronidase                                                                                                                                                                                                            |
| Cbol4933 CDS CDS                   | 7.0   | 3.0  | 10.6 | G | COG1129                         | ABC-type sugar transport system, ATPase component                                                                                                                                                                                                |
| TS29Fae04105 CDS CDS               | 3.5   | 1.5  | 10.6 | G | COG1904                         | Glucuronate isomerase                                                                                                                                                                                                                            |
| TS28Fae16796 CDS CDS               | 7.0   | 3.0  | 10.6 | G | COG0191                         | Fructose/tagatose bisphosphate aldolase                                                                                                                                                                                                          |
| Msmi750774 CDS CDS                 | 0.6   | 0.3  | 10.6 | G | COG0483 COG0061                 | Archaeal fructose-1,6-bisphosphatase and related enzymes of inositol monophosphatase family Predicted sugar kinase                                                                                                                               |

|                                      |       |       |      |   |                                 |                                                                                                                                                                                                                                                                          |
|--------------------------------------|-------|-------|------|---|---------------------------------|--------------------------------------------------------------------------------------------------------------------------------------------------------------------------------------------------------------------------------------------------------------------------|
| BactD10197 CDS CDS                   | 2.3   | 1.0   | 10.6 | G | COG2211                         | Na <sup>+</sup> /melibiose symporter and related transporters                                                                                                                                                                                                            |
| TS28Fae10964 CDS CDS                 | 2.3   | 1.0   | 10.6 | G | COG1653                         | ABC-type sugar transport system, periplasmic component                                                                                                                                                                                                                   |
| BactD12498 CDS CDS                   | 14.3  | 6.2   | 10.6 | G | COG0296 COG0366 COG1523         | 1,4-alpha-glucan branching enzyme Glycosidases Type II secretory pathway, pullulanase PulA and related glycosidases                                                                                                                                                      |
| Bun11039 CDS CDS                     | 15.0  | 6.5   | 10.5 | G | COG0021                         | Transketolase                                                                                                                                                                                                                                                            |
| Cbol1789 CDS CDS                     | 11.5  | 5.0   | 10.4 | G | COG0800                         | 2-keto-3-deoxy-6-phosphogluconate aldolase                                                                                                                                                                                                                               |
| Bxyl11419 CDS CDS                    | 5.8   | 2.5   | 10.4 | G | COG1482                         | Phosphomannose isomerase                                                                                                                                                                                                                                                 |
| TS28Fae18004 CDS CDS                 | 19.5  | 8.5   | 10.4 | G | COG0126 COG0149                 | 3-phosphoglycerate kinase Triosephosphate isomerase                                                                                                                                                                                                                      |
| Bxyl0496 CDS CDS                     | 8.0   | 3.5   | 10.4 | G | COG1904                         | Glucuronate isomerase                                                                                                                                                                                                                                                    |
| TS28Rum08404 CDS CDS                 | 3.0   | 1.3   | 10.2 | G | COG0235                         | Ribulose-5-phosphate 4-epimerase and related epimerases and aldolases                                                                                                                                                                                                    |
| Clen0154 CDS CDS                     | 3.0   | 1.3   | 10.2 | G | COG1070                         | Sugar (pentulose and hexulose) kinases                                                                                                                                                                                                                                   |
| BactD13546 CDS CDS                   | 3.0   | 1.3   | 10.2 | G | COG3250                         | Beta-galactosidase/beta-glucuronidase                                                                                                                                                                                                                                    |
| Casp2879 CDS CDS                     | 4.5   | 2.0   | 10.2 | G | COG1879 COG4213                 | ABC-type sugar transport system, periplasmic component ABC-type xylose transport system, periplasmic component                                                                                                                                                           |
| Caer0051 CDS CDS                     | 4.5   | 2.0   | 10.2 | G | COG0448                         | ADP-glucose pyrophosphorylase                                                                                                                                                                                                                                            |
| Dfor1753 CDS CDS                     | 4.5   | 2.0   | 10.2 | G | COG0205                         | 6-phosphofruktokinase                                                                                                                                                                                                                                                    |
| Bryfor3651 CDS CDS                   | 4.5   | 2.0   | 10.2 | G | COG0149                         | Triosephosphate isomerase                                                                                                                                                                                                                                                |
| Bpse1623 CDS CDS                     | 2.3   | 1.0   | 10.2 | G | COG0191                         | Fructose/tagatose biphosphate aldolase                                                                                                                                                                                                                                   |
| TS29Rum09402 CDS CDS                 | 4.5   | 2.0   | 10.2 | G | COG0366 COG3281 COG1640         | Glycosidases Uncharacterized protein, probably involved in trehalose biosynthesis 4-alpha-glucanotransferase                                                                                                                                                             |
| TS28Bac1718 CDS CDS                  | 1.1   | 0.5   | 10.1 | G | COG0057                         | Glyceraldehyde-3-phosphate dehydrogenase/erythrose-4-phosphate dehydrogenase                                                                                                                                                                                             |
| TS28Fae21432 CDS CDS                 | 58.9  | 26.5  | 10.1 | G | COG0057                         | Glyceraldehyde-3-phosphate dehydrogenase/erythrose-4-phosphate dehydrogenase                                                                                                                                                                                             |
| TS29Fae10163 CDS CDS                 | 58.9  | 26.5  | 10.1 | G | COG0057                         | Glyceraldehyde-3-phosphate dehydrogenase/erythrose-4-phosphate dehydrogenase                                                                                                                                                                                             |
| Bun10566 CDS CDS                     | 20.0  | 9.0   | 10.1 | G | COG0296                         | 1,4-alpha-glucan branching enzyme                                                                                                                                                                                                                                        |
| BFnct0241 CDS phosphoglyceromutase   | 3.3   | 1.5   | 10.1 | G | COG0696                         | Phosphoglyceromutase                                                                                                                                                                                                                                                     |
| BFych460292 CDS phosphoglyceromutase | 3.3   | 1.5   | 10.1 | G | COG0696                         | Phosphoglyceromutase                                                                                                                                                                                                                                                     |
| TS29Rum17063 CDS CDS                 | 132.0 | 59.5  | 10.1 | G | COG1653                         | ABC-type sugar transport system, periplasmic component                                                                                                                                                                                                                   |
| TS29Rum19947 CDS CDS                 | 1.5   | 68.5  | 0.1  | G | COG3250                         | Beta-galactosidase/beta-glucuronidase                                                                                                                                                                                                                                    |
| TS29Bac06649 CDS CDS                 | 0.3   | 15.5  | 0.1  | G | COG3534                         | Alpha-L-arabinofuranosidase                                                                                                                                                                                                                                              |
| TS29Bif3460 CDS CDS                  | 2.5   | 116.5 | 0.1  | G | COG1653                         | ABC-type sugar transport system, periplasmic component                                                                                                                                                                                                                   |
| TS29RumUnc1625 CDS CDS               | 1.0   | 47.0  | 0.1  | G | COG1653                         | ABC-type sugar transport system, periplasmic component                                                                                                                                                                                                                   |
| TS29Rum20774 CDS CDS                 | 3.0   | 141.5 | 0.1  | G | COG0058                         | Glucan phosphorylase                                                                                                                                                                                                                                                     |
| TS29Fae10067 CDS CDS                 | 3.8   | 183.0 | 0.1  | G | COG3250                         | Beta-galactosidase/beta-glucuronidase                                                                                                                                                                                                                                    |
| TS29Rum19427 CDS CDS                 | 1.0   | 48.0  | 0.1  | G | COG1175                         | ABC-type sugar transport systems, permease components                                                                                                                                                                                                                    |
| TS29Rum00317 CDS CDS                 | 1.0   | 48.0  | 0.1  | G | COG1175                         | ABC-type sugar transport systems, permease components                                                                                                                                                                                                                    |
| TS29Bif2442 CDS CDS                  | 4.5   | 216.5 | 0.1  | G | COG1472                         | Beta-glucosidase-related glycosidases                                                                                                                                                                                                                                    |
| TS29Rum03154 CDS CDS                 | 1.0   | 49.0  | 0.1  | G | COG0383                         | Alpha-mannosidase                                                                                                                                                                                                                                                        |
| TS29Rum16581 CDS CDS                 | 2.0   | 99.0  | 0.1  | G | COG2190 COG1264                 | Phosphotransferase system IIA components Phosphotransferase system IIB components                                                                                                                                                                                        |
| TS28Fae22252 CDS CDS                 | 0.5   | 25.0  | 0.1  | G | COG2723                         | Beta-glucosidase/6-phospho-beta-glucosidase/beta-galactosidase                                                                                                                                                                                                           |
| TS28Fae18201 CDS CDS                 | 1.0   | 50.5  | 0.1  | G | COG1109                         | Phosphomannomutase                                                                                                                                                                                                                                                       |
| TS28Bif1656 CDS CDS                  | 0.4   | 17.8  | 0.1  | G | COG1874                         | Beta-galactosidase                                                                                                                                                                                                                                                       |
| FpraM2120602 CDS CDS                 | 1.0   | 51.0  | 0.1  | G | COG1501                         | Alpha-glucosidases, family 31 of glycosyl hydrolases                                                                                                                                                                                                                     |
| TS28Fae16621 CDS CDS                 | 1.0   | 52.0  | 0.1  | G | COG3459                         | Cellobiose phosphorylase                                                                                                                                                                                                                                                 |
| TS28Fae21374 CDS CDS                 | 0.5   | 26.0  | 0.1  | G | COG2723                         | Beta-glucosidase/6-phospho-beta-glucosidase/beta-galactosidase                                                                                                                                                                                                           |
| TS29Rum16550 CDS CDS                 | 2.0   | 107.0 | 0.1  | G | COG3345                         | Alpha-galactosidase                                                                                                                                                                                                                                                      |
| TS28Bif4951 CDS CDS                  | 0.3   | 13.5  | 0.1  | G | COG0153                         | Galactokinase                                                                                                                                                                                                                                                            |
| TS28Fae20836 CDS CDS                 | 0.5   | 27.0  | 0.1  | G | COG0153                         | Galactokinase                                                                                                                                                                                                                                                            |
| TS28Fae15027 CDS CDS                 | 0.5   | 27.0  | 0.1  | G | COG0406                         | Fructose-2,6-bisphosphatase                                                                                                                                                                                                                                              |
| TS29Fae07234 CDS CDS                 | 3.0   | 162.0 | 0.1  | G | COG3250                         | Beta-galactosidase/beta-glucuronidase                                                                                                                                                                                                                                    |
| TS29Fae07251 CDS CDS                 | 1.0   | 54.0  | 0.1  | G | COG1482                         | Phosphomannose isomerase                                                                                                                                                                                                                                                 |
| TS29Bif1408 CDS CDS                  | 0.7   | 36.0  | 0.1  | G | COG2190 COG1264                 | Phosphotransferase system IIA components Phosphotransferase system IIB components                                                                                                                                                                                        |
| TS29Fae01011 CDS CDS                 | 0.3   | 18.0  | 0.1  | G | COG2942                         | N-acyl-D-glucosamine 2-epimerase                                                                                                                                                                                                                                         |
| TS28Bif5093 CDS CDS                  | 1.0   | 55.0  | 0.1  | G | COG1879 COG1172 COG4211 COG4158 | ABC-type sugar transport system, periplasmic component Ribose/xylose/arabinose/galactoside ABC-type transport systems, permease components ABC-type glucose/galactose transport system, permease component Predicted ABC-type sugar transport system, permease component |
| TS29Fae03198 CDS CDS                 | 1.0   | 55.5  | 0.1  | G | COG1175                         | ABC-type sugar transport systems, permease components                                                                                                                                                                                                                    |
| TS29Bac05994 CDS CDS                 | 0.2   | 11.2  | 0.1  | G | COG1929                         | Glycerate kinase                                                                                                                                                                                                                                                         |
| TS29Bif0069 CDS CDS                  | 0.5   | 28.0  | 0.1  | G | COG1653                         | ABC-type sugar transport system, periplasmic component                                                                                                                                                                                                                   |
| TS29Rum16743 CDS CDS                 | 1.0   | 57.5  | 0.1  | G | COG3414 COG3037                 | Phosphotransferase system, galactitol-specific IIB component Uncharacterized protein conserved in bacteria                                                                                                                                                               |
| TS28Bif5094 CDS CDS                  | 0.8   | 43.2  | 0.1  | G | COG1879 COG1172 COG4158         | ABC-type sugar transport system, periplasmic component Ribose/xylose/arabinose/galactoside ABC-type transport systems, permease components Predicted ABC-type sugar transport system, permease component                                                                 |
| TS29Bif4061 CDS CDS                  | 0.8   | 43.2  | 0.1  | G | COG1879 COG1172 COG4158         | ABC-type sugar transport system, periplasmic component Ribose/xylose/arabinose/galactoside ABC-type transport systems, permease components Predicted ABC-type sugar transport system, permease component                                                                 |
| Bpse0138 CDS CDS                     | 0.7   | 38.5  | 0.1  | G | COG2190 COG1264                 | Phosphotransferase system IIA components Phosphotransferase system IIB components                                                                                                                                                                                        |
| TS29Bif0349 CDS CDS                  | 0.7   | 38.7  | 0.1  | G | COG0366                         | Glycosidases                                                                                                                                                                                                                                                             |
| TS29Bif1969 CDS CDS                  | 0.3   | 19.7  | 0.1  | G | COG0126 COG0149                 | 3-phosphoglycerate kinase Triosephosphate isomerase                                                                                                                                                                                                                      |
| TS28Bif1192 CDS CDS                  | 0.8   | 44.3  | 0.1  | G | COG0366                         | Glycosidases                                                                                                                                                                                                                                                             |
| TS28Bif0398 CDS CDS                  | 1.5   | 89.5  | 0.1  | G | COG1070                         | Sugar (pentulose and hexulose) kinases                                                                                                                                                                                                                                   |
| TS29Fae07226 CDS CDS                 | 2.0   | 120.0 | 0.1  | G | COG1653                         | ABC-type sugar transport system, periplasmic component                                                                                                                                                                                                                   |
| TS29Col1892 CDS CDS                  | 0.5   | 30.0  | 0.1  | G | COG3444 COG2893                 | Phosphotransferase system, mannose/fructose/N-acetylgalactosamine-specific component IIB Phosphotransferase system, mannose/fructose-specific component IIA                                                                                                              |
| Beat1020 CDS CDS                     | 0.5   | 30.5  | 0.1  | G | COG1175                         | ABC-type sugar transport systems, permease components                                                                                                                                                                                                                    |
| TS29Bac03401 CDS CDS                 | 0.3   | 20.5  | 0.1  | G | COG4806                         | L-rhamnose isomerase                                                                                                                                                                                                                                                     |
| TS29Fae09099 CDS CDS                 | 0.5   | 31.0  | 0.1  | G | COG1482                         | Phosphomannose isomerase                                                                                                                                                                                                                                                 |
| TS29Bif0176 CDS CDS                  | 0.3   | 20.8  | 0.1  | G | COG0580                         | Glycerol uptake facilitator and related permeases (Major Intrinsic Protein Family)                                                                                                                                                                                       |
| TS29Fae05959 CDS CDS                 | 1.0   | 63.0  | 0.1  | G | COG1175 COG4209                 | ABC-type sugar transport systems, permease components ABC-type polysaccharide transport system, permease component                                                                                                                                                       |
| TS28Bif0871 CDS CDS                  | 0.3   | 21.0  | 0.1  | G | COG2723                         | Beta-glucosidase/6-phospho-beta-glucosidase/beta-galactosidase                                                                                                                                                                                                           |
| TS29Bif0407 CDS CDS                  | 1.3   | 84.2  | 0.1  | G | COG3345                         | Alpha-galactosidase                                                                                                                                                                                                                                                      |
| Bpse1406 CDS CDS                     | 0.7   | 42.2  | 0.1  | G | COG0366                         | Glycosidases                                                                                                                                                                                                                                                             |

|                         |     |       |     |   |                                 |                                                                                                                                                                                   |
|-------------------------|-----|-------|-----|---|---------------------------------|-----------------------------------------------------------------------------------------------------------------------------------------------------------------------------------|
| TS29Fae01185 CDS CDS    | 2.5 | 159.5 | 0.1 | G | COG1501                         | Alpha-glucosidases, family 31 of glycosyl hydrolases                                                                                                                              |
| TS28Fae13802 CDS CDS    | 0.5 | 32.0  | 0.1 | G | COG1482                         | Phosphomannose isomerase                                                                                                                                                          |
| TS29RumUnc0132 CDS CDS  | 1.0 | 64.0  | 0.1 | G | COG1653                         | ABC-type sugar transport system, periplasmic component                                                                                                                            |
| Bbre0172 CDS CDS        | 0.5 | 32.5  | 0.1 | G | COG1175                         | ABC-type sugar transport systems, permease components                                                                                                                             |
| TS28Bif1183 CDS CDS     | 1.5 | 97.7  | 0.1 | G | COG1501                         | Alpha-glucosidases, family 31 of glycosyl hydrolases                                                                                                                              |
| TS29Fae05536 CDS CDS    | 3.0 | 196.0 | 0.1 | G | COG1501                         | Alpha-glucosidases, family 31 of glycosyl hydrolases                                                                                                                              |
| TS29Fae04921 CDS CDS    | 0.7 | 44.0  | 0.1 | G | COG0235 COG1720                 | Ribulose-5-phosphate 4-epimerase and related epimerases and aldolases Uncharacterized conserved protein                                                                           |
| Bbre0174 CDS CDS        | 0.3 | 22.0  | 0.1 | G | COG2723                         | Beta-glucosidase/6-phospho-beta-glucosidase/beta-galactosidase                                                                                                                    |
| TS29Fae05958 CDS CDS    | 1.0 | 67.0  | 0.1 | G | COG0395 COG3833                 | ABC-type sugar transport system, permease component ABC-type maltose transport systems, permease component                                                                        |
| TS29Rum00343 CDS CDS    | 1.0 | 67.0  | 0.1 | G | COG0406 COG2068                 | Fructose-2,6-bisphosphatase Uncharacterized MobA-related protein                                                                                                                  |
| TS28Bif1921 CDS CDS     | 0.3 | 16.8  | 0.1 | G | COG3001                         | Fructosamine-3-kinase                                                                                                                                                             |
| TS29Bif3509 CDS CDS     | 1.3 | 84.5  | 0.1 | G | COG0153                         | Galactokinase                                                                                                                                                                     |
| TS29Bac08433 CDS CDS    | 0.3 | 22.7  | 0.1 | G | COG3855                         | Uncharacterized protein conserved in bacteria                                                                                                                                     |
| TS29Bif3459 CDS CDS     | 1.3 | 85.2  | 0.1 | G | COG1653                         | ABC-type sugar transport system, periplasmic component                                                                                                                            |
| TS29Bif0414 CDS CDS     | 1.7 | 114.5 | 0.1 | G | COG0366                         | Glycosidases                                                                                                                                                                      |
| TS29RumUnc1629 CDS CDS  | 1.0 | 69.0  | 0.1 | G | COG1621                         | Beta-fructosidases (levanase/invertase)                                                                                                                                           |
| TS29Bif3817 CDS CDS     | 0.3 | 23.4  | 0.1 | G | COG0120                         | Ribose 5-phosphate isomerase                                                                                                                                                      |
| TS28Bif0790 CDS CDS     | 0.3 | 23.4  | 0.1 | G | COG0120                         | Ribose 3-phosphate isomerase                                                                                                                                                      |
| TS29Fae01170 CDS CDS    | 1.0 | 71.0  | 0.1 | G | COG1653                         | ABC-type sugar transport system, periplasmic component                                                                                                                            |
| TS29RumUnc0058 CDS CDS  | 1.0 | 71.0  | 0.1 | G | COG1109                         | Phosphomannomutase                                                                                                                                                                |
| TS29RumUnc0780 CDS CDS  | 1.0 | 72.0  | 0.1 | G | COG1472                         | Beta-glucosidase-related glycosidases                                                                                                                                             |
| TS29Bif3887 CDS CDS     | 0.8 | 54.4  | 0.1 | G | COG4213                         | ABC-type xylose transport system, periplasmic component                                                                                                                           |
| TS28Bif0707 CDS CDS     | 0.8 | 54.4  | 0.1 | G | COG4213                         | ABC-type xylose transport system, periplasmic component                                                                                                                           |
| TS29Col0673 CDS CDS     | 1.0 | 73.5  | 0.1 | G | COG2190 COG1264 COG1263         | Phosphotransferase system IIA components Phosphotransferase system IIB components Phosphotransferase system IIC components, glucose/maltose/N-acetylglucosamine-specific          |
| TS29Fae07218 CDS CDS    | 2.0 | 148.0 | 0.1 | G | COG0366                         | Glycosidases                                                                                                                                                                      |
| TS29Rum16785 CDS CDS    | 0.5 | 37.5  | 0.1 | G | COG1653                         | ABC-type sugar transport system, periplasmic component                                                                                                                            |
| TS28Fae22256 CDS CDS    | 0.5 | 38.5  | 0.1 | G | COG3090 COG1593                 | TRAP-type C4-dicarboxylate transport system, small permease component TRAP-type C4-dicarboxylate transport system, large permease component                                       |
| TS29Bac09566 CDS CDS    | 0.3 | 26.5  | 0.1 | G | COG0574                         | Phosphoenolpyruvate synthase/pyruvate phosphate dikinase                                                                                                                          |
| TS28Bif1651 CDS CDS     | 0.3 | 19.9  | 0.1 | G | COG1653                         | ABC-type sugar transport system, periplasmic component                                                                                                                            |
| TS29Rum20799 CDS CDS    | 0.5 | 40.0  | 0.1 | G | COG0395 COG3833                 | ABC-type sugar transport system, permease component ABC-type maltose transport systems, permease component                                                                        |
| TS28Bif0682 CDS CDS     | 1.0 | 80.0  | 0.1 | G | COG3534                         | Alpha-L-arabinofuranosidase                                                                                                                                                       |
| TS29Bif3908 CDS CDS     | 1.0 | 80.0  | 0.1 | G | COG3534                         | Alpha-L-arabinofuranosidase                                                                                                                                                       |
| TS28Fae00257 CDS CDS    | 0.5 | 41.0  | 0.1 | G | COG1621                         | Beta-fructosidases (levanase/invertase)                                                                                                                                           |
| TS28Bif4546 CDS CDS     | 0.3 | 20.8  | 0.1 | G | COG1175                         | ABC-type sugar transport systems, permease components                                                                                                                             |
| TS29Fae05440 CDS CDS    | 2.0 | 167.0 | 0.1 | G | COG3250                         | Beta-galactosidase/beta-glucuronidase                                                                                                                                             |
| TS29Bif3423 CDS CDS     | 2.0 | 167.2 | 0.1 | G | COG3534                         | Alpha-L-arabinofuranosidase                                                                                                                                                       |
| TS29Bif3905 CDS CDS     | 1.0 | 84.0  | 0.1 | G | COG3507                         | Beta-xylosidase                                                                                                                                                                   |
| TS29Bac11072 CDS CDS    | 0.3 | 28.0  | 0.1 | G | COG1874                         | Beta-galactosidase                                                                                                                                                                |
| TS29Fae05964 CDS CDS    | 1.0 | 85.0  | 0.1 | G | COG2706                         | 3-carboxymuconate cyclase                                                                                                                                                         |
| TS29RumUnc0074 CDS CDS  | 1.0 | 85.0  | 0.1 | G | COG0366 COG1523 COG3281 COG1640 | Glycosidases Type II secretory pathway, pullulanase PulA and related glycosidases Uncharacterized protein, probably involved in trehalose biosynthesis 4-alpha-glucanotransferase |
| TS29Bif0429 CDS CDS     | 3.0 | 257.3 | 0.1 | G | COG3345                         | Alpha-galactosidase                                                                                                                                                               |
| TS29Col1463 CDS CDS     | 0.5 | 43.0  | 0.1 | G | COG2723                         | Beta-glucosidase/6-phospho-beta-glucosidase/beta-galactosidase                                                                                                                    |
| TS29Bif0577 CDS CDS     | 1.0 | 86.2  | 0.1 | G | COG0366                         | Glycosidases                                                                                                                                                                      |
| TS29Col1465 CDS CDS     | 0.5 | 43.5  | 0.1 | G | COG1455                         | Phosphotransferase system cellobiose-specific component IIC                                                                                                                       |
| TS29Fae07195 CDS CDS    | 1.0 | 88.0  | 0.1 | G | COG3250                         | Beta-galactosidase/beta-glucuronidase                                                                                                                                             |
| TS29Rum11959 CDS CDS    | 0.5 | 45.0  | 0.1 | G | COG0366 COG3281                 | Glycosidases Uncharacterized protein, probably involved in trehalose biosynthesis                                                                                                 |
| TS29Rum15476 CDS CDS    | 1.0 | 90.5  | 0.1 | G | COG2190 COG1264 COG1263         | Phosphotransferase system IIA components Phosphotransferase system IIB components Phosphotransferase system IIC components, glucose/maltose/N-acetylglucosamine-specific          |
| TS29Rum13471 CDS CDS    | 1.0 | 91.0  | 0.0 | G | COG3459                         | Cellobiose phosphorylase                                                                                                                                                          |
| TS29Bif0584 CDS CDS     | 0.8 | 68.3  | 0.0 | G | COG0366                         | Glycosidases                                                                                                                                                                      |
| TS29Col0291 CDS CDS     | 0.5 | 46.0  | 0.0 | G | COG1109                         | Phosphomannomutase                                                                                                                                                                |
| TS29Bif0395 CDS CDS     | 0.3 | 31.3  | 0.0 | G | COG1109                         | Phosphomannomutase                                                                                                                                                                |
| Beat1029 CDS CDS        | 0.5 | 47.0  | 0.0 | G | COG1640 COG3280                 | 4-alpha-glucanotransferase Maltooligosyl trehalose synthase                                                                                                                       |
| Beat1016 CDS CDS        | 0.5 | 47.0  | 0.0 | G | COG1653                         | ABC-type sugar transport system, periplasmic component                                                                                                                            |
| TS28Bif0567 CDS CDS     | 0.8 | 72.2  | 0.0 | G | COG1653                         | ABC-type sugar transport system, periplasmic component                                                                                                                            |
| TS29Bac01349 CDS CDS    | 0.3 | 32.7  | 0.0 | G | COG1874                         | Beta-galactosidase                                                                                                                                                                |
| TS29Col0681 CDS CDS     | 0.5 | 49.0  | 0.0 | G | COG1640                         | 4-alpha-glucanotransferase                                                                                                                                                        |
| TS29Rum13468 CDS CDS    | 0.5 | 49.5  | 0.0 | G | COG1653                         | ABC-type sugar transport system, periplasmic component                                                                                                                            |
| TS28Fae12536 CDS CDS    | 0.3 | 33.0  | 0.0 | G | COG0297                         | Glycogen synthase                                                                                                                                                                 |
| TS29Bif0123 CDS CDS     | 0.3 | 67.7  | 0.0 | G | COG3345                         | Alpha-galactosidase                                                                                                                                                               |
| TS29Rum13422 CDS CDS    | 0.5 | 52.0  | 0.0 | G | COG2211                         | Na <sup>+</sup> /melibiose symporter and related transporters                                                                                                                     |
| TS29Rum20798 CDS CDS    | 1.0 | 105.0 | 0.0 | G | COG3534                         | Alpha-L-arabinofuranosidase                                                                                                                                                       |
| BLD0735 CDS Pullulanase | 0.7 | 70.2  | 0.0 | G | COG1523                         | Type II secretory pathway, pullulanase PulA and related glycosidases                                                                                                              |
| TS29Bif0660 CDS CDS     | 0.8 | 79.2  | 0.0 | G | COG0364                         | Glucose-6-phosphate 1-dehydrogenase                                                                                                                                               |
| TS29Bif0269 CDS CDS     | 0.3 | 26.4  | 0.0 | G | COG1653                         | ABC-type sugar transport system, periplasmic component                                                                                                                            |
| TS29Bif0426 CDS CDS     | 0.8 | 79.8  | 0.0 | G | COG1653                         | ABC-type sugar transport system, periplasmic component                                                                                                                            |
| TS29Fae00657 CDS CDS    | 0.5 | 53.5  | 0.0 | G | COG0058                         | Glucan phosphorylase                                                                                                                                                              |
| TS29Bif3752 CDS CDS     | 0.5 | 54.5  | 0.0 | G | COG1175                         | ABC-type sugar transport systems, permease components                                                                                                                             |
| TS28Fae18040 CDS CDS    | 0.3 | 37.0  | 0.0 | G | COG1109                         | Phosphomannomutase                                                                                                                                                                |
| TS29Bif3094 CDS CDS     | 0.7 | 74.7  | 0.0 | G | COG1523                         | Type II secretory pathway, pullulanase PulA and related glycosidases                                                                                                              |
| TS29Bac08162 CDS CDS    | 0.3 | 28.5  | 0.0 | G | COG1877 COG0561 COG0380         | Trehalose-6-phosphatase Predicted hydrolases of the HAD superfamily Trehalose-6-phosphate synthase                                                                                |
| TS29Fae09101 CDS CDS    | 1.0 | 119.5 | 0.0 | G | COG1109                         | Phosphomannomutase                                                                                                                                                                |
| TS29Bif2794 CDS CDS     | 0.3 | 30.1  | 0.0 | G | COG3001                         | Fructosamine-3-kinase                                                                                                                                                             |
| TS28Bif0577 CDS CDS     | 0.3 | 41.0  | 0.0 | G | COG1175                         | ABC-type sugar transport systems, permease components                                                                                                                             |
| TS29Bif0418 CDS CDS     | 0.3 | 41.0  | 0.0 | G | COG1175                         | ABC-type sugar transport systems, permease components                                                                                                                             |
| TS29Bif0057 CDS CDS     | 0.5 | 62.0  | 0.0 | G | COG1640 COG3280                 | 4-alpha-glucanotransferase Maltooligosyl trehalose synthase                                                                                                                       |
| TS29Fae09121 CDS CDS    | 1.0 | 124.0 | 0.0 | G | COG0383                         | Alpha-mannosidase                                                                                                                                                                 |
| TS28Fae18785 CDS CDS    | 0.5 | 63.0  | 0.0 | G | COG0205                         | 6-phosphofructokinase                                                                                                                                                             |
| TS29Bac01484 CDS CDS    | 0.3 | 42.0  | 0.0 | G | COG3250                         | Beta-galactosidase/beta-glucuronidase                                                                                                                                             |
| TS28Bif0573 CDS CDS     | 0.5 | 64.2  | 0.0 | G | COG1653                         | ABC-type sugar transport system, periplasmic component                                                                                                                            |
| TS29Bif0421 CDS CDS     | 0.5 | 64.2  | 0.0 | G | COG1653                         | ABC-type sugar transport system, periplasmic component                                                                                                                            |
| TS28Bif3485 CDS CDS     | 0.3 | 32.3  | 0.0 | G | COG1070                         | Sugar (pentulose and hexulose) kinases                                                                                                                                            |
| TS29Bif3539 CDS CDS     | 0.3 | 32.8  | 0.0 | G | COG1175                         | ABC-type sugar transport systems, permease components                                                                                                                             |
| TS28Fae17618 CDS CDS    | 0.2 | 23.0  | 0.0 | G | COG0058                         | Glucan phosphorylase                                                                                                                                                              |

|                                                    |     |       |      |            |                                                                     |                                                                                                                                                                                                                                                                                                         |
|----------------------------------------------------|-----|-------|------|------------|---------------------------------------------------------------------|---------------------------------------------------------------------------------------------------------------------------------------------------------------------------------------------------------------------------------------------------------------------------------------------------------|
| TS28Bif4918 CDS CDS                                | 0.3 | 35.0  | 0.0  | G          | COG1109                                                             | Phosphomannomutase                                                                                                                                                                                                                                                                                      |
| TS28Bif1655 CDS CDS                                | 0.5 | 71.5  | 0.0  | G          | COG0395                                                             | ABC-type sugar transport system, permease component                                                                                                                                                                                                                                                     |
| TS29Fae00319 CDS CDS                               | 0.5 | 73.0  | 0.0  | G          | COG1070 COG4806                                                     | Sugar (pentulose and hexulose) kinases L-rhamnose isomerase                                                                                                                                                                                                                                             |
| TS29Fae09165 CDS CDS                               | 2.0 | 292.0 | 0.0  | G          | COG4724                                                             | Endo-beta-N-acetylglucosaminidase D                                                                                                                                                                                                                                                                     |
| TS28Fae19417 CDS CDS                               | 0.2 | 30.0  | 0.0  | G          | COG2017                                                             | Galactose mutarotase and related enzymes                                                                                                                                                                                                                                                                |
| TS28Bif0684 CDS CDS                                | 0.3 | 50.7  | 0.0  | G          | COG3507                                                             | Beta-xylosidase                                                                                                                                                                                                                                                                                         |
| TS28Fae17779 CDS CDS                               | 0.3 | 38.0  | 0.0  | G          | COG0296                                                             | 1,4-alpha-glucan branching enzyme                                                                                                                                                                                                                                                                       |
| Bbre0337 CDS CDS                                   | 0.3 | 38.6  | 0.0  | G          | COG1472                                                             | Beta-glucosidase-related glycosidases                                                                                                                                                                                                                                                                   |
| TS29Bif0093 CDS CDS                                | 0.7 | 103.2 | 0.0  | G          | COG3250                                                             | Beta-galactosidase/beta-glucuronidase                                                                                                                                                                                                                                                                   |
| TS29Fae08648 CDS CDS                               | 0.5 | 82.0  | 0.0  | G          | COG0205                                                             | 6-phosphofructokinase                                                                                                                                                                                                                                                                                   |
| TS29Bif1341 CDS CDS                                | 0.1 | 25.5  | 0.0  | G          | COG3405                                                             | Endoglucanase Y                                                                                                                                                                                                                                                                                         |
| TS29Bif0041 CDS CDS                                | 0.7 | 122.3 | 0.0  | G          | COG3250                                                             | Beta-galactosidase/beta-glucuronidase                                                                                                                                                                                                                                                                   |
| TS29Rum20811 CDS CDS                               | 0.5 | 92.5  | 0.0  | G          | COG3534                                                             | Alpha-L-arabinofuranosidase                                                                                                                                                                                                                                                                             |
| TS29Fae06380 CDS CDS                               | 0.5 | 98.5  | 0.0  | G          | COG1109                                                             | Phosphomannomutase                                                                                                                                                                                                                                                                                      |
| TS29Bif2392 CDS CDS                                | 0.3 | 49.8  | 0.0  | G          | COG1070                                                             | Sugar (pentulose and hexulose) kinases                                                                                                                                                                                                                                                                  |
| TS29Rum17068 CDS CDS                               | 1.0 | 201.0 | 0.0  | G          | COG3090 COG1593 <br>COG1638                                         | TRAP-type C4-dicarboxylate transport system, small permease component TRAP-type C4-dicarboxylate transport system, large permease component TRAP-type C4-dicarboxylate transport system, periplasmic component                                                                                          |
| BL0527 CDS 4-alpha-glucanotransferase              | 0.3 | 54.9  | 0.0  | G          | COG1640 COG3280                                                     | 4-alpha-glucanotransferase Maltooligosyl trehalose synthase                                                                                                                                                                                                                                             |
| TS29Fae05512 CDS CDS                               | 0.5 | 110.5 | 0.0  | G          | COG2211                                                             | Na+/melibiose symporter and related transporters                                                                                                                                                                                                                                                        |
| BLD1321 CDS 4-alpha-glucanotransferase             | 0.3 | 55.3  | 0.0  | G          | COG1640 COG3280                                                     | 4-alpha-glucanotransferase Maltooligosyl trehalose synthase                                                                                                                                                                                                                                             |
| TS28Bif5365 CDS CDS                                | 0.3 | 55.4  | 0.0  | G          | COG2211                                                             | Na+/melibiose symporter and related transporters                                                                                                                                                                                                                                                        |
| TS29Bif0013 CDS CDS                                | 0.5 | 113.3 | 0.0  | G          | COG3250                                                             | Beta-galactosidase/beta-glucuronidase                                                                                                                                                                                                                                                                   |
| TS29Bif754 CDS CDS                                 | 0.3 | 78.0  | 0.0  | G          | COG2723                                                             | Beta-glucosidase/6-phospho-beta-glucosidase/beta-galactosidase                                                                                                                                                                                                                                          |
| BLD1661 CDS endo-1,4-beta-xylanase/Beta-xylosidase | 0.3 | 68.2  | 0.0  | G          | COG3507                                                             | Beta-xylosidase                                                                                                                                                                                                                                                                                         |
| TS29Bif2547 CDS CDS                                | 0.3 | 73.0  | 0.0  | G          | COG0524                                                             | Sugar kinases, ribokinase family                                                                                                                                                                                                                                                                        |
| TS29Fae08929 CDS CDS                               | 0.5 | 150.5 | 0.0  | G          | COG1472                                                             | Beta-glucosidase-related glycosidases                                                                                                                                                                                                                                                                   |
| TS29Bif3698 CDS CDS                                | 0.3 | 76.0  | 0.0  | G          | COG1472                                                             | Beta-glucosidase-related glycosidases                                                                                                                                                                                                                                                                   |
| TS29Bif723 CDS CDS                                 | 0.3 | 77.0  | 0.0  | G          | COG3507                                                             | Beta-xylosidase                                                                                                                                                                                                                                                                                         |
| TS29Bif2448 CDS CDS                                | 0.3 | 108.5 | 0.0  | G          | COG2942                                                             | N-acvl-D-glucosamine 2-epimerase                                                                                                                                                                                                                                                                        |
| TS28Bif189 CDS CDS                                 | 0.3 | 89.9  | 0.0  | G          | COG1640 COG3280                                                     | 4-alpha-glucanotransferase Maltooligosyl trehalose synthase                                                                                                                                                                                                                                             |
| TS29Bif0586 CDS CDS                                | 0.3 | 89.9  | 0.0  | G          | COG1640 COG3280                                                     | 4-alpha-glucanotransferase Maltooligosyl trehalose synthase                                                                                                                                                                                                                                             |
| TS29Bif0273 CDS CDS                                | 0.1 | 37.8  | 0.0  | G          | COG1874                                                             | Beta-galactosidase                                                                                                                                                                                                                                                                                      |
| TS29Bif2809 CDS CDS                                | 0.2 | 76.3  | 0.0  | G          | COG0580                                                             | Glycerol uptake facilitator and related permeases (Major Intrinsic Protein Family)                                                                                                                                                                                                                      |
| TS28Bif0908 CDS CDS                                | 0.3 | 95.7  | 0.0  | G          | COG3507                                                             | Beta-xylosidase                                                                                                                                                                                                                                                                                         |
| TS29Bif3087 CDS CDS                                | 0.3 | 97.4  | 0.0  | G          | COG2211                                                             | Na+/melibiose symporter and related transporters                                                                                                                                                                                                                                                        |
| TS29Bif3906 CDS CDS                                | 0.3 | 133.7 | 0.0  | G          | COG3507                                                             | Beta-xylosidase                                                                                                                                                                                                                                                                                         |
| TS29Bif3483 CDS CDS                                | 0.3 | 100.8 | 0.0  | G          | COG1109                                                             | Phosphomannomutase                                                                                                                                                                                                                                                                                      |
| TS29Fae07187 CDS CDS                               | 0.5 | 202.0 | 0.0  | G          | COG1472                                                             | Beta-glucosidase-related glycosidases                                                                                                                                                                                                                                                                   |
| TS29Bif3962 CDS CDS                                | 0.3 | 105.6 | 0.0  | G          | COG1472                                                             | Beta-glucosidase-related glycosidases                                                                                                                                                                                                                                                                   |
| TS28Cio06065 CDS CDS                               | 1.7 | 0.3   | 22.7 | GI         | COG1070 COG0554                                                     | Sugar (pentulose and hexulose) kinases Glycerol kinase                                                                                                                                                                                                                                                  |
| TS29Bif1503 CDS CDS                                | 0.3 | 39.8  | 0.0  | GI         | COG1070 COG1069                                                     | Sugar (pentulose and hexulose) kinases Ribulose kinase                                                                                                                                                                                                                                                  |
| TS29Bif2950 CDS CDS                                | 0.3 | 13.0  | 0.1  | GI F       | COG0537                                                             | Diadenosine tetraphosphate (Ap4A) hydrolase and other HIT family hydrolases                                                                                                                                                                                                                             |
| TS28Bif0232 CDS CDS                                | 0.3 | 13.0  | 0.1  | GI F       | COG0537                                                             | Diadenosine tetraphosphate (Ap4A) hydrolase and other HIT family hydrolases                                                                                                                                                                                                                             |
| TS29Bif2798 CDS CDS                                | 0.3 | 16.0  | 0.1  | GI F       | COG0537                                                             | Diadenosine tetraphosphate (Ap4A) hydrolase and other HIT family hydrolases                                                                                                                                                                                                                             |
| TS28Bif1914 CDS CDS                                | 0.3 | 16.0  | 0.1  | GI F       | COG0537                                                             | Diadenosine tetraphosphate (Ap4A) hydrolase and other HIT family hydrolases                                                                                                                                                                                                                             |
| TS29Bif3326 CDS CDS                                | 1.0 | 93.8  | 0.0  | GI F       | COG1051 COG0647                                                     | ADP-ribose pyrophosphatase Predicted sugar phosphatases of the HAD superfamily                                                                                                                                                                                                                          |
| TS29Fae00655 CDS CDS                               | 1.0 | 49.5  | 0.1  | GI F K L T | COG4753 COG2207 <br>COG4936 COG3706 <br>COG2169 COG3449 <br>COG3664 | Response regulator containing CheY-like receiver domain and AraC-type DNA-binding domain AraC-type DNA-binding domain-containing proteins Predicted sensor domain Response regulator containing a CheY-like receiver domain and a GGDEF domain Adenosine deaminase DNA gyrase inhibitor Beta-xylosidase |
| TS29Fae05476 CDS CDS                               | 1.0 | 79.0  | 0.1  | GI F K T   | COG4753 COG2207 <br>COG2169 COG3664 <br>COG4977                     | Response regulator containing CheY-like receiver domain and AraC-type DNA-binding domain AraC-type DNA-binding domain-containing proteins Adenosine deaminase Beta-xylosidase Transcriptional regulator containing an amidase domain and an AraC-type DNA-binding HTH domain                            |
| TS29Rum04198 CDS CDS                               | 7.7 | 2.0   | 17.4 | GI H       | COG0698 COG2227                                                     | Ribose 5-phosphate isomerase RpIb2-polyprenyl-3-methyl-5-hydroxy-6-metoxyl-4-benzoquinol methylase                                                                                                                                                                                                      |
| TS29Fae06767 CDS CDS                               | 0.5 | 54.5  | 0.0  | GI H       | COG0021 COG1154 <br>COG3958                                         | Transketolase Deoxyxylulose-5-phosphate synthase Transketolase, C-terminal subunit                                                                                                                                                                                                                      |
| BactD10540 CDS CDS                                 | 2.8 | 0.5   | 25.0 | GI Q       | COG1028 COG1070 <br>COG0246                                         | Dehydrogenases with different specificities (related to short-chain alcohol dehydrogenases) Sugar (pentulose and hexulose) kinases Mannitol-1-phosphate/altronate dehydrogenases                                                                                                                        |
| TS28Bac6130 CDS CDS                                | 9.7 | 1.0   | 44.2 | GI K       | COG1940                                                             | Transcriptional regulator/sugar kinase                                                                                                                                                                                                                                                                  |
| TS28Rum15621 CDS CDS                               | 4.5 | 0.5   | 40.9 | GI K       | COG1349                                                             | Transcriptional regulators of sugar metabolism                                                                                                                                                                                                                                                          |
| TS28Eub0585 CDS CDS                                | 3.5 | 0.5   | 31.8 | GI K       | COG2390 COG2376                                                     | Transcriptional regulator, contains sigma factor-related N-terminal domain Dihydroxyacetone kinase                                                                                                                                                                                                      |
| TS28Rum09030 CDS CDS                               | 8.0 | 3.0   | 12.1 | GI K       | COG1940                                                             | Transcriptional regulator/sugar kinase                                                                                                                                                                                                                                                                  |
| TS28Rum14218 CDS CDS                               | 0.5 | 25.5  | 0.1  | GI K       | COG2390 COG2376                                                     | Transcriptional regulator, contains sigma factor-related N-terminal domain Dihydroxyacetone kinase                                                                                                                                                                                                      |
| TS29Rum21143 CDS CDS                               | 0.5 | 25.5  | 0.1  | GI K       | COG2390 COG2376                                                     | Transcriptional regulator, contains sigma factor-related N-terminal domain Dihydroxyacetone kinase                                                                                                                                                                                                      |
| TS29Col1119 CDS CDS                                | 0.5 | 31.0  | 0.1  | GI K       | COG1879 COG1609                                                     | ABC-type sugar transport system, periplasmic component Transcriptional regulators                                                                                                                                                                                                                       |
| TS29Fae09117 CDS CDS                               | 0.5 | 37.0  | 0.1  | GI K       | COG1940                                                             | Transcriptional regulator/sugar kinase                                                                                                                                                                                                                                                                  |
| TS29Bif3886 CDS CDS                                | 0.5 | 43.9  | 0.1  | GI K       | COG1940                                                             | Transcriptional regulator/sugar kinase                                                                                                                                                                                                                                                                  |
| TS28Bif0708 CDS CDS                                | 0.5 | 43.9  | 0.1  | GI K       | COG1940                                                             | Transcriptional regulator/sugar kinase                                                                                                                                                                                                                                                                  |
| TS29Bif2452 CDS CDS                                | 0.8 | 77.5  | 0.0  | GI K       | COG1940                                                             | Transcriptional regulator/sugar kinase                                                                                                                                                                                                                                                                  |
| TS29Rum16852 CDS CDS                               | 0.5 | 67.0  | 0.0  | GI K       | COG1940                                                             | Transcriptional regulator/sugar kinase                                                                                                                                                                                                                                                                  |
| TS29Col0739 CDS CDS                                | 0.3 | 45.0  | 0.0  | GI K       | COG1940                                                             | Transcriptional regulator/sugar kinase                                                                                                                                                                                                                                                                  |
| TS29Rum16071 CDS CDS                               | 0.3 | 17.0  | 0.1  | GI K L T   | COG4753 COG2207 <br>COG4936 COG3708 <br>COG3449 COG3664             | Response regulator containing CheY-like receiver domain and AraC-type DNA-binding domain AraC-type DNA-binding domain-containing proteins Predicted sensor domain Uncharacterized protein conserved in bacterial DNA gyrase inhibitor Beta-xylosidase                                                   |



|                      |       |       |      |       |                                                                                                                                 |                                                                                                                                                                                                                                                                                                                                                                                                                                                                                                                                                                                                                                                                                                                                                                                                                                                                                                               |
|----------------------|-------|-------|------|-------|---------------------------------------------------------------------------------------------------------------------------------|---------------------------------------------------------------------------------------------------------------------------------------------------------------------------------------------------------------------------------------------------------------------------------------------------------------------------------------------------------------------------------------------------------------------------------------------------------------------------------------------------------------------------------------------------------------------------------------------------------------------------------------------------------------------------------------------------------------------------------------------------------------------------------------------------------------------------------------------------------------------------------------------------------------|
| TS28Rum11663 CDS CDS | 3.0   | 1.0   | 13.6 | G K T | COG4753 COG2207 COG3664                                                                                                         | Response regulator containing CheY-like receiver domain and AraC-type DNA-binding domain AraC-type DNA-binding domain-containing proteins Beta-xylosidase                                                                                                                                                                                                                                                                                                                                                                                                                                                                                                                                                                                                                                                                                                                                                     |
| TS29Bac08672 CDS CDS | 0.3   | 30.5  | 0.0  | G K T | COG0642 COG5002 COG2202 COG0745 COG4753 COG2770 COG0784 COG2198 COG5278 COG3292 COG2972 COG5001 COG3706 COG4251 COG1879 COG2114 | Signal transduction histidine kinase Signal transduction histidine kinase FOG: PAS/PAC domain Response regulators consisting of a CheY-like receiver domain and a winged-helix DNA-binding domain Response regulator containing CheY-like receiver domain and AraC-type DNA-binding domain FOG: HAMP domain FOG: CheY-like receiver FOG: HPT domain Predicted periplasmic ligand-binding sensor domain Predicted periplasmic ligand-binding sensor domain Predicted signal transduction protein with a C-terminal ATPase domain Predicted signal transduction protein containing a membrane domain, an EAL and a GGDEF domain Response regulator containing a CheY-like receiver domain and a GGDEF domain Bacteriophytochrome (light-regulated signal transduction histidine kinase) ABC-type sugar transport system, periplasmic component Adenylyate cyclase, family 3 (some proteins contain HAMP domain) |
| TS29Fae05516 CDS CDS | 1.0   | 139.5 | 0.0  | G K T | COG4753 COG2207 COG3437 COG4936 COG3664 COG4977                                                                                 | Response regulator containing CheY-like receiver domain and AraC-type DNA-binding domain AraC-type DNA-binding domain-containing proteins Response regulator containing a CheY-like receiver domain and an HD-GYP domain Predicted sensor domain Beta-xylosidase Transcriptional regulator containing an amidase domain and an AraC-type DNA-binding HTH domain                                                                                                                                                                                                                                                                                                                                                                                                                                                                                                                                               |
| TS28Met1503 CDS CDS  | 0.8   | 0.3   | 13.6 | G L   | COG0574 COG1372                                                                                                                 | Phosphoenolpyruvate synthase pyruvate phosphate dikinase Intein/homing endonuclease                                                                                                                                                                                                                                                                                                                                                                                                                                                                                                                                                                                                                                                                                                                                                                                                                           |
| TS28Bac4814 CDS CDS  | 4.0   | 0.3   | 54.5 | G M   | COG0451                                                                                                                         | Nucleoside-diphosphate-sugar epimerases                                                                                                                                                                                                                                                                                                                                                                                                                                                                                                                                                                                                                                                                                                                                                                                                                                                                       |
| TS28Fae10696 CDS CDS | 7.5   | 2.0   | 17.0 | G M   | COG3507 COG2273 COG2730 COG5520                                                                                                 | Beta-xylosidase Beta-glucanase Beta-glucan synthetase Endoglucanase O-Glycosyl hydrolase                                                                                                                                                                                                                                                                                                                                                                                                                                                                                                                                                                                                                                                                                                                                                                                                                      |
| TS28Par2344 CDS CDS  | 4.6   | 1.3   | 15.6 | G M   | COG0438 COG0058                                                                                                                 | Glycosyltransferase Glucan phosphorylase                                                                                                                                                                                                                                                                                                                                                                                                                                                                                                                                                                                                                                                                                                                                                                                                                                                                      |
| TS28Bac4238 CDS CDS  | 2.0   | 0.7   | 13.6 | G M   | COG1086                                                                                                                         | Predicted nucleoside-diphosphate sugar epimerases                                                                                                                                                                                                                                                                                                                                                                                                                                                                                                                                                                                                                                                                                                                                                                                                                                                             |
| TS28Ai12026 CDS CDS  | 3.0   | 1.0   | 13.6 | G M   | COG0451                                                                                                                         | Nucleoside-diphosphate-sugar epimerases                                                                                                                                                                                                                                                                                                                                                                                                                                                                                                                                                                                                                                                                                                                                                                                                                                                                       |
| TS28Fae14958 CDS CDS | 2.5   | 1.0   | 11.3 | G M   | COG0451 COG1087                                                                                                                 | Nucleoside-diphosphate-sugar epimerases UDP-glucose 4-epimerase                                                                                                                                                                                                                                                                                                                                                                                                                                                                                                                                                                                                                                                                                                                                                                                                                                               |
| TS29Bac01994 CDS CDS | 28.0  | 12.0  | 10.6 | G M   | COG3594 COG0463 COG1887 COG1442                                                                                                 | Fucose 4-O-acetylase and related acetyltransferases Glycosyltransferases involved in cell wall biogenesis Putative glycosyl/glycerophosphate transferases involved in teichoic acid biosynthesis TagF/TagB/EpsJ/RodC Lipopolysaccharide biosynthesis proteins, LPS:glycosyltransferases                                                                                                                                                                                                                                                                                                                                                                                                                                                                                                                                                                                                                       |
| TS28Met1820 CDS CDS  | 0.8   | 0.3   | 10.2 | G M   | COG1086                                                                                                                         | Predicted nucleoside-diphosphate sugar epimerases                                                                                                                                                                                                                                                                                                                                                                                                                                                                                                                                                                                                                                                                                                                                                                                                                                                             |
| TS29Col0825 CDS CDS  | 1.5   | 71.0  | 0.1  | G M   | COG0463 COG0726 COG1216 COG1887 COG3754                                                                                         | Glycosyltransferases involved in cell wall biogenesis Predicted xylanase/chitin deacetylase Predicted glycosyltransferases Putative glycosyl/glycerophosphate transferases involved in teichoic acid biosynthesis TagF/TagB/EpsJ/RodC Lipopolysaccharide biosynthesis protein                                                                                                                                                                                                                                                                                                                                                                                                                                                                                                                                                                                                                                 |
| TS29Bac05078 CDS CDS | 0.5   | 28.5  | 0.1  | G M   | COG3594 COG0463 COG1887 COG1442                                                                                                 | Fucose 4-O-acetylase and related acetyltransferases Glycosyltransferases involved in cell wall biogenesis Putative glycosyl/glycerophosphate transferases involved in teichoic acid biosynthesis TagF/TagB/EpsJ/RodC Lipopolysaccharide biosynthesis proteins, LPS:glycosyltransferases                                                                                                                                                                                                                                                                                                                                                                                                                                                                                                                                                                                                                       |
| TS29Fae01252 CDS CDS | 1.0   | 70.0  | 0.1  | G M   | COG3594 COG0463 COG1215 COG1887 COG1442                                                                                         | Fucose 4-O-acetylase and related acetyltransferases Glycosyltransferases involved in cell wall biogenesis Glycosyltransferases, probably involved in cell wall biogenesis Putative glycosyl/glycerophosphate transferases involved in teichoic acid biosynthesis TagF/TagB/EpsJ/RodC Lipopolysaccharide biosynthesis proteins, LPS:glycosyltransferases                                                                                                                                                                                                                                                                                                                                                                                                                                                                                                                                                       |
| TS29Bac10867 CDS CDS | 0.3   | 18.0  | 0.1  | G M   | COG0451                                                                                                                         | Nucleoside-diphosphate-sugar epimerases                                                                                                                                                                                                                                                                                                                                                                                                                                                                                                                                                                                                                                                                                                                                                                                                                                                                       |
| TS29Fae10492 CDS CDS | 1.0   | 74.0  | 0.1  | G M   | COG5632 COG4193                                                                                                                 | N-acetylmuramoyl-L-alanine amidase Beta- N-acetylglucosaminidase                                                                                                                                                                                                                                                                                                                                                                                                                                                                                                                                                                                                                                                                                                                                                                                                                                              |
| TS29Bif3604 CDS CDS  | 1.0   | 99.3  | 0.0  | G M   | COG1682                                                                                                                         | ABC-type polysaccharide/polyol phosphate export systems, permease component                                                                                                                                                                                                                                                                                                                                                                                                                                                                                                                                                                                                                                                                                                                                                                                                                                   |
| TS29Bif3722 CDS CDS  | 0.5   | 87.3  | 0.0  | G M   | COG3507 COG5498                                                                                                                 | Beta-xylosidase Predicted glycosyl hydrolase                                                                                                                                                                                                                                                                                                                                                                                                                                                                                                                                                                                                                                                                                                                                                                                                                                                                  |
| TS28Bif1093 CDS CDS  | 0.3   | 48.0  | 0.0  | G M   | COG3594 COG0463 COG1215 COG1887                                                                                                 | Fucose 4-O-acetylase and related acetyltransferases Glycosyltransferases involved in cell wall biogenesis Putative glycosyl/glycerophosphate transferases involved in teichoic acid biosynthesis TagF/TagB/EpsJ/RodC                                                                                                                                                                                                                                                                                                                                                                                                                                                                                                                                                                                                                                                                                          |
| TS29Bif0662 CDS CDS  | 0.3   | 48.0  | 0.0  | G M   | COG3594 COG0463 COG1215 COG1887                                                                                                 | Fucose 4-O-acetylase and related acetyltransferases Glycosyltransferases involved in cell wall biogenesis Putative glycosyl/glycerophosphate transferases involved in teichoic acid biosynthesis TagF/TagB/EpsJ/RodC                                                                                                                                                                                                                                                                                                                                                                                                                                                                                                                                                                                                                                                                                          |
| TS28Bif0909 CDS CDS  | 0.5   | 108.3 | 0.0  | G M   | COG3507 COG5498                                                                                                                 | Beta-xylosidase Predicted glycosyl hydrolase                                                                                                                                                                                                                                                                                                                                                                                                                                                                                                                                                                                                                                                                                                                                                                                                                                                                  |
| TS29Rum20836 CDS CDS | 0.5   | 118.0 | 0.0  | G M   | COG0451                                                                                                                         | Nucleoside-diphosphate-sugar epimerases                                                                                                                                                                                                                                                                                                                                                                                                                                                                                                                                                                                                                                                                                                                                                                                                                                                                       |
| TS28Fae18814 CDS CDS | 13.5  | 1.5   | 40.9 | G M T | COG3103 COG5632 COG4193                                                                                                         | SH3 domain protein N-acetylmuramoyl-L-alanine amidase Beta- N-acetylglucosaminidase                                                                                                                                                                                                                                                                                                                                                                                                                                                                                                                                                                                                                                                                                                                                                                                                                           |
| TS28Rum01341 CDS CDS | 4.0   | 1.5   | 12.1 | G N   | COG5492 COG1501                                                                                                                 | Bacterial surface proteins containing Ig-like domains Alpha-glucosidases, family 31 of glycosyl hydrolases                                                                                                                                                                                                                                                                                                                                                                                                                                                                                                                                                                                                                                                                                                                                                                                                    |
| TS28Rum01339 CDS CDS | 22.2  | 8.5   | 11.8 | G N   | COG5492 COG1501                                                                                                                 | Bacterial surface proteins containing Ig-like domains Alpha-glucosidases, family 31 of glycosyl hydrolases                                                                                                                                                                                                                                                                                                                                                                                                                                                                                                                                                                                                                                                                                                                                                                                                    |
| TS29Bif3543 CDS CDS  | 7.5   | 406.0 | 0.1  | G N   | COG5492 COG3507                                                                                                                 | Bacterial surface proteins containing Ig-like domains Beta-xylosidase                                                                                                                                                                                                                                                                                                                                                                                                                                                                                                                                                                                                                                                                                                                                                                                                                                         |
| TS29Bif3542 CDS CDS  | 3.3   | 203.4 | 0.1  | G N   | COG5492 COG3507                                                                                                                 | Bacterial surface proteins containing Ig-like domains Beta-xylosidase                                                                                                                                                                                                                                                                                                                                                                                                                                                                                                                                                                                                                                                                                                                                                                                                                                         |
| TS29Bif3547 CDS CDS  | 4.5   | 647.0 | 0.0  | G N M | COG5492 COG3507 COG5498 COG3940 COG3533                                                                                         | Bacterial surface proteins containing Ig-like domains Beta-xylosidase Predicted glycosyl hydrolase Predicted beta-xylosidase Uncharacterized protein conserved in bacteria                                                                                                                                                                                                                                                                                                                                                                                                                                                                                                                                                                                                                                                                                                                                    |
| TS28Rum13581 CDS CDS | 7.0   | 2.0   | 15.9 | G O   | COG0637 COG1214 COG1554                                                                                                         | Predicted phosphatase/phosphohexomutase Inactive homolog of metal-dependent proteases, putative molecular chaperone Trehalose and maltose hydrolases (possible phosphorylases)                                                                                                                                                                                                                                                                                                                                                                                                                                                                                                                                                                                                                                                                                                                                |
| TS28Rum01185 CDS CDS | 13.5  | 1.0   | 61.3 | G T   | COG5002 COG1879                                                                                                                 | Signal transduction histidine kinase ABC-type sugar transport system, periplasmic component                                                                                                                                                                                                                                                                                                                                                                                                                                                                                                                                                                                                                                                                                                                                                                                                                   |
| TS29Rum16901 CDS CDS | 501.3 | 59.0  | 38.6 | G T   | COG5002 COG1879 COG1129                                                                                                         | Signal transduction histidine kinase ABC-type sugar transport system, periplasmic component ABC-type sugar transport system, ATPase component                                                                                                                                                                                                                                                                                                                                                                                                                                                                                                                                                                                                                                                                                                                                                                 |
| TS28Rum15515 CDS CDS | 7.0   | 2.0   | 15.9 | G T   | COG0469 COG3848                                                                                                                 | Pyruvate kinase Phosphohistidine swiveling domain                                                                                                                                                                                                                                                                                                                                                                                                                                                                                                                                                                                                                                                                                                                                                                                                                                                             |
| TS28Rum10868 CDS CDS | 2.3   | 0.7   | 15.9 | G T   | COG4668 COG1080 COG3412 COG1762 COG3605 COG1925                                                                                 | Mannitol/fructose-specific phosphotransferase system, IIA domain Phosphoenolpyruvate-protein kinase (PTS system EI component in bacteria) Uncharacterized protein conserved in bacteria Phosphotransferase system mannitol/fructose-specific IIA domain (Ntr-type) Signal transduction protein containing GAF and PtsI domains Phosphotransferase system, HPr-related proteins                                                                                                                                                                                                                                                                                                                                                                                                                                                                                                                                |
| TS28Bac0234 CDS CDS  | 2.3   | 1.0   | 10.6 | G T   | COG5002 COG1879                                                                                                                 | Signal transduction histidine kinase ABC-type sugar transport system, periplasmic component                                                                                                                                                                                                                                                                                                                                                                                                                                                                                                                                                                                                                                                                                                                                                                                                                   |

|                      |      |       |       |     |                                                                                                 |                                                                                                                                                                                                                                                                                                                                                                                                                                                                                                                                                                                                                                                                 |
|----------------------|------|-------|-------|-----|-------------------------------------------------------------------------------------------------|-----------------------------------------------------------------------------------------------------------------------------------------------------------------------------------------------------------------------------------------------------------------------------------------------------------------------------------------------------------------------------------------------------------------------------------------------------------------------------------------------------------------------------------------------------------------------------------------------------------------------------------------------------------------|
| TS29Bac04953 CDS CDS | 0.5  | 42.0  | 0.1   | G T | COG0642 COG5002 COG2202 COG4753 COG2770 COG0784 COG3292 COG5001 COG3706 COG4251 COG1879 COG2114 | Signal transduction histidine kinase Signal transduction histidine kinase FOG: PAS/PAC domain Response regulator containing CheY-like receiver domain and AraC-type DNA-binding domain FOG: HAMP domain FOG: CheY-like receiver Predicted periplasmic ligand-binding sensor domain Predicted signal transduction protein containing a membrane domain, an EAL and a GGDEF domain Response regulator containing a CheY-like receiver domain and a GGDEF domain Bacteriophytochrome (light-regulated signal transduction histidine kinase) ABC-type sugar transport system, periplasmic component Adenylate cyclase, family 3 (some proteins contain HAMP domain) |
| TS29Bif1788 CDS CDS  | 0.3  | 44.0  | 0.0   | G T | COG0469 COG3848                                                                                 | Pyruvate kinase Phosphohistidine swiveling domain                                                                                                                                                                                                                                                                                                                                                                                                                                                                                                                                                                                                               |
| Rtor0098 CDS CDS     | 44.0 | 13.5  | 14.8  | G U | COG3291 COG2273 COG3250 COG1472 COG3525 COG0823                                                 | FOG: PKD repeat Beta-glucanase Beta-glucan synthetase Beta-galactosidase beta-glucuronidase Beta-glucosidase-related glycosidases N-acetyl-beta-hexosaminidase Periplasmic component of the Tol biopolymer transport system                                                                                                                                                                                                                                                                                                                                                                                                                                     |
| Bxy10042 CDS CDS     | 4.4  | 0.7   | 29.7  | G V | COG1132 COG0524 COG0800                                                                         | ABC-type multidrug transport system, ATPase and permease components Sugar kinases, ribokinase family 2-keto-3-deoxy-6-phosphogluconate aldolase                                                                                                                                                                                                                                                                                                                                                                                                                                                                                                                 |
| TS29Fae05459 CDS CDS | 1.0  | 138.0 | 0.0   | G V | COG1680 COG1472                                                                                 | Beta-lactamase class C and other penicillin binding proteins Beta-glucosidase-related glycosidases                                                                                                                                                                                                                                                                                                                                                                                                                                                                                                                                                              |
| TS28Rum10322 CDS CDS | 72.0 | 1.0   | 326.9 | H   | COG0181                                                                                         | Porphobilinogen deaminase                                                                                                                                                                                                                                                                                                                                                                                                                                                                                                                                                                                                                                       |
| Msmi740778 CDS CDS   | 19.3 | 0.5   | 175.5 | H   | COG4058                                                                                         | Methyl coenzyme M reductase, alpha subunit                                                                                                                                                                                                                                                                                                                                                                                                                                                                                                                                                                                                                      |
| Msmi750908 CDS CDS   | 8.3  | 0.3   | 149.8 | H   | COG4055                                                                                         | Methyl coenzyme M reductase, subunit D                                                                                                                                                                                                                                                                                                                                                                                                                                                                                                                                                                                                                          |
| TS28Met0368 CDS CDS  | 23.0 | 1.0   | 104.4 | H   | COG4058                                                                                         | Methyl coenzyme M reductase, alpha subunit                                                                                                                                                                                                                                                                                                                                                                                                                                                                                                                                                                                                                      |
| Msmi740775 CDS CDS   | 5.3  | 0.3   | 95.3  | H   | COG4055                                                                                         | Methyl coenzyme M reductase, subunit D                                                                                                                                                                                                                                                                                                                                                                                                                                                                                                                                                                                                                          |
| Buni3420 CDS CDS     | 30.0 | 1.5   | 90.8  | H   | COG0156                                                                                         | 7-keto-8-aminopelargolate synthetase and related enzymes                                                                                                                                                                                                                                                                                                                                                                                                                                                                                                                                                                                                        |
| Msmi750905 CDS CDS   | 22.6 | 1.5   | 68.3  | H   | COG4058                                                                                         | Methyl coenzyme M reductase, alpha subunit                                                                                                                                                                                                                                                                                                                                                                                                                                                                                                                                                                                                                      |
| TS28Met0372 CDS CDS  | 20.3 | 1.4   | 64.9  | H   | COG4054                                                                                         | Methyl coenzyme M reductase, beta subunit                                                                                                                                                                                                                                                                                                                                                                                                                                                                                                                                                                                                                       |
| TS28Rum0060 CDS CDS  | 36.0 | 3.0   | 54.5  | H   | COG4822                                                                                         | Cobalamin biosynthesis protein CbiK, Co2+ chelataze                                                                                                                                                                                                                                                                                                                                                                                                                                                                                                                                                                                                             |
| Bfin0663 CDS CDS     | 2.7  | 0.3   | 49.3  | H   | COG0379                                                                                         | Quinolinate synthase                                                                                                                                                                                                                                                                                                                                                                                                                                                                                                                                                                                                                                            |
| Msmi750909 CDS CDS   | 19.6 | 1.9   | 46.4  | H   | COG4054                                                                                         | Methyl coenzyme M reductase, beta subunit                                                                                                                                                                                                                                                                                                                                                                                                                                                                                                                                                                                                                       |
| Bxy13983 CDS CDS     | 3.3  | 0.3   | 45.2  | H   | COG0156                                                                                         | 7-keto-8-aminopelargolate synthetase and related enzymes                                                                                                                                                                                                                                                                                                                                                                                                                                                                                                                                                                                                        |
| Buni1250 CDS CDS     | 3.0  | 0.3   | 40.9  | H   | COG1575                                                                                         | 1,4-dihydroxy-2-naphthoate octaprenyltransferase                                                                                                                                                                                                                                                                                                                                                                                                                                                                                                                                                                                                                |
| BactD14059 CDS CDS   | 2.0  | 0.3   | 36.8  | H   | COG0379                                                                                         | Quinolinate synthase                                                                                                                                                                                                                                                                                                                                                                                                                                                                                                                                                                                                                                            |
| ShiispD90954 CDS CDS | 4.0  | 0.5   | 36.3  | H   | COG1985                                                                                         | Purimidine reductase, riboflavin biosynthesis                                                                                                                                                                                                                                                                                                                                                                                                                                                                                                                                                                                                                   |
| Aput1191 CDS CDS     | 8.0  | 1.0   | 36.3  | H   | COG0043                                                                                         | 3-polyvinyl-4-hydroxybenzoate decarboxylase and related decarboxylases                                                                                                                                                                                                                                                                                                                                                                                                                                                                                                                                                                                          |
| TS29Met0756 CDS CDS  | 13.0 | 1.7   | 35.4  | H   | COG1429                                                                                         | Cobalamin biosynthesis protein CobN and related Mg-chelatazes                                                                                                                                                                                                                                                                                                                                                                                                                                                                                                                                                                                                   |
| TS29Rum12347 CDS CDS | 4.7  | 0.7   | 31.8  | H   | COG0414                                                                                         | Panthothenate synthetase                                                                                                                                                                                                                                                                                                                                                                                                                                                                                                                                                                                                                                        |
| Buni3404 CDS CDS     | 3.3  | 0.5   | 30.3  | H   | COG0285 COG0294                                                                                 | Folypolyglutamate synthase Dihydropteroate synthase and related enzymes                                                                                                                                                                                                                                                                                                                                                                                                                                                                                                                                                                                         |
| TS28Bac2715 CDS CDS  | 3.3  | 0.5   | 30.3  | H   | COG0285 COG0294                                                                                 | Folypolyglutamate synthase Dihydropteroate synthase and related enzymes                                                                                                                                                                                                                                                                                                                                                                                                                                                                                                                                                                                         |
| TS28Met0371 CDS CDS  | 8.3  | 1.3   | 30.0  | H   | COG4055                                                                                         | Methyl coenzyme M reductase, subunit D                                                                                                                                                                                                                                                                                                                                                                                                                                                                                                                                                                                                                          |
| TS28Met0369 CDS CDS  | 14.8 | 2.3   | 28.9  | H   | COG4057                                                                                         | Methyl coenzyme M reductase, gamma subunit                                                                                                                                                                                                                                                                                                                                                                                                                                                                                                                                                                                                                      |
| Msmi750906 CDS CDS   | 14.8 | 2.3   | 28.9  | H   | COG4057                                                                                         | Methyl coenzyme M reductase, gamma subunit                                                                                                                                                                                                                                                                                                                                                                                                                                                                                                                                                                                                                      |
| TS28Rum15411 CDS CDS | 3.0  | 0.5   | 27.2  | H   | COG2875 COG2073 COG2241                                                                         | Precorrin-4 methylase Cobalamin biosynthesis protein CbiG Precorrin-6B methylase 1                                                                                                                                                                                                                                                                                                                                                                                                                                                                                                                                                                              |
| TS28Fae15359 CDS CDS | 3.0  | 0.5   | 27.2  | H   | COG0190                                                                                         | 5,10-methylene-tetrahydrofolate dehydrogenase/Methenyl tetrahydrofolate cyclohydrolase                                                                                                                                                                                                                                                                                                                                                                                                                                                                                                                                                                          |
| TS29Clo3121 CDS CDS  | 6.0  | 1.0   | 27.2  | H   | COG4822                                                                                         | Cobalamin biosynthesis protein CbiK, Co2+ chelataze                                                                                                                                                                                                                                                                                                                                                                                                                                                                                                                                                                                                             |
| TS28Fae1385 CDS CDS  | 6.0  | 1.0   | 27.2  | H   | COG0854 COG0319                                                                                 | Pyridoxal phosphate biosynthesis protein Predicted metal-dependent hydrolase                                                                                                                                                                                                                                                                                                                                                                                                                                                                                                                                                                                    |
| Msmi750907 CDS CDS   | 20.5 | 3.5   | 26.6  | H   | COG4056                                                                                         | Methyl coenzyme M reductase, subunit C                                                                                                                                                                                                                                                                                                                                                                                                                                                                                                                                                                                                                          |
| TS29Bac02278 CDS CDS | 5.5  | 1.0   | 25.0  | H   | COG0029                                                                                         | Aspartate oxidase                                                                                                                                                                                                                                                                                                                                                                                                                                                                                                                                                                                                                                               |
| TS28Fae18410 CDS CDS | 8.0  | 1.5   | 24.2  | H   | COG0285 COG0294                                                                                 | Folypolyglutamate synthase Dihydropteroate synthase and related enzymes                                                                                                                                                                                                                                                                                                                                                                                                                                                                                                                                                                                         |
| Bxvl1095 CDS CDS     | 2.7  | 0.5   | 24.2  | H   | COG0142                                                                                         | Geranylgeranyl pyrophosphate synthase                                                                                                                                                                                                                                                                                                                                                                                                                                                                                                                                                                                                                           |
| Msmi740774 CDS CDS   | 20.6 | 3.9   | 23.9  | H   | COG4054                                                                                         | Methyl coenzyme M reductase, beta subunit                                                                                                                                                                                                                                                                                                                                                                                                                                                                                                                                                                                                                       |
| TS29Clo3112 CDS CDS  | 10.0 | 2.0   | 22.7  | H   | COG0181                                                                                         | Porphobilinogen deaminase                                                                                                                                                                                                                                                                                                                                                                                                                                                                                                                                                                                                                                       |
| Aput034 CDS CDS      | 9.5  | 2.0   | 21.6  | H   | COG0156                                                                                         | 7-keto-8-aminopelargolate synthetase and related enzymes                                                                                                                                                                                                                                                                                                                                                                                                                                                                                                                                                                                                        |
| Aput1842 CDS CDS     | 14.0 | 3.0   | 21.2  | H   | COG0320                                                                                         | Lipoate synthase                                                                                                                                                                                                                                                                                                                                                                                                                                                                                                                                                                                                                                                |
| Begg0851 CDS CDS     | 5.1  | 1.1   | 20.9  | H   | COG4206                                                                                         | Outer membrane cobalamin receptor protein                                                                                                                                                                                                                                                                                                                                                                                                                                                                                                                                                                                                                       |
| Dfor2466 CDS CDS     | 4.3  | 1.0   | 19.7  | H   | COG4822                                                                                         | Cobalamin biosynthesis protein CbiK, Co2+ chelataze                                                                                                                                                                                                                                                                                                                                                                                                                                                                                                                                                                                                             |
| Beoproc1931 CDS CDS  | 5.1  | 1.2   | 19.6  | H   | COG4206                                                                                         | Outer membrane cobalamin receptor protein                                                                                                                                                                                                                                                                                                                                                                                                                                                                                                                                                                                                                       |
| TS29Bac10512 CDS CDS | 98.3 | 23.0  | 19.4  | H   | COG0262                                                                                         | Dihydrofolate reductase                                                                                                                                                                                                                                                                                                                                                                                                                                                                                                                                                                                                                                         |
| TS28Rum09613 CDS CDS | 8.5  | 2.0   | 19.3  | H   | COG0669                                                                                         | Phosphopantetheine adenylyltransferase                                                                                                                                                                                                                                                                                                                                                                                                                                                                                                                                                                                                                          |
| Beap0729 CDS CDS     | 4.0  | 1.0   | 18.2  | H   | COG0499                                                                                         | S-adenosylhomocysteine hydrolase                                                                                                                                                                                                                                                                                                                                                                                                                                                                                                                                                                                                                                |
| ShiispD90201 CDS CDS | 4.0  | 1.0   | 18.2  | H   | COG0181                                                                                         | Porphobilinogen deaminase                                                                                                                                                                                                                                                                                                                                                                                                                                                                                                                                                                                                                                       |
| TS28Dor2344 CDS CDS  | 2.0  | 0.5   | 18.2  | H   | COG0294                                                                                         | Dihydropteroate synthase and related enzymes                                                                                                                                                                                                                                                                                                                                                                                                                                                                                                                                                                                                                    |
| Dfor2233 CDS CDS     | 8.0  | 2.0   | 18.2  | H   | COG5012 COG0407                                                                                 | Predicted cobalamin binding protein Uroporphyrinogen-III decarboxylase                                                                                                                                                                                                                                                                                                                                                                                                                                                                                                                                                                                          |
| TS28Rum01588 CDS CDS | 4.0  | 1.0   | 18.2  | H   | COG4822                                                                                         | Cobalamin biosynthesis protein CbiK, Co2+ chelataze                                                                                                                                                                                                                                                                                                                                                                                                                                                                                                                                                                                                             |
| TS28Fae02054 CDS CDS | 2.0  | 0.5   | 18.2  | H   | COG0854 COG0319                                                                                 | Pyridoxal phosphate biosynthesis protein Predicted metal-dependent hydrolase                                                                                                                                                                                                                                                                                                                                                                                                                                                                                                                                                                                    |
| Bthe7332109 CDS CDS  | 1.3  | 0.3   | 18.2  | H   | COG0212                                                                                         | 5-formyltetrahydrofolate cyclo-ligase                                                                                                                                                                                                                                                                                                                                                                                                                                                                                                                                                                                                                           |
| BactD11322 CDS CDS   | 5.1  | 1.3   | 18.0  | H   | COG4206                                                                                         | Outer membrane cobalamin receptor protein                                                                                                                                                                                                                                                                                                                                                                                                                                                                                                                                                                                                                       |
| ShiispD90103 CDS CDS | 3.8  | 1.0   | 17.4  | H   | COG0635                                                                                         | Coproporphyrinogen III oxidase and related Fe-S oxidoreductases                                                                                                                                                                                                                                                                                                                                                                                                                                                                                                                                                                                                 |
| BactD12122 CDS CDS   | 3.7  | 1.0   | 16.9  | H   | COG0157                                                                                         | Nicotinate-nucleotide pyrophosphorylase                                                                                                                                                                                                                                                                                                                                                                                                                                                                                                                                                                                                                         |
| Bxvl1217 CDS CDS     | 5.1  | 1.4   | 16.6  | H   | COG4206                                                                                         | Outer membrane cobalamin receptor protein                                                                                                                                                                                                                                                                                                                                                                                                                                                                                                                                                                                                                       |
| TS29Rum18053 CDS CDS | 18.0 | 5.0   | 16.3  | H   | COG2109                                                                                         | ATP:corrinoid adenosyltransferase                                                                                                                                                                                                                                                                                                                                                                                                                                                                                                                                                                                                                               |
| Chol4859 CDS CDS     | 7.0  | 2.0   | 15.9  | H   | COG0285 COG0294                                                                                 | Folypolyglutamate synthase Dihydropteroate synthase and related enzymes                                                                                                                                                                                                                                                                                                                                                                                                                                                                                                                                                                                         |
| TS28Rum13468 CDS CDS | 3.5  | 1.0   | 15.9  | H   | COG1060 COG0502                                                                                 | Thiamine biosynthesis enzyme ThiH and related uncharacterized enzymes Biotin synthase and related enzymes                                                                                                                                                                                                                                                                                                                                                                                                                                                                                                                                                       |
| Robe2887 CDS CDS     | 21.3 | 6.3   | 15.5  | H   | COG4822                                                                                         | Cobalamin biosynthesis protein CbiK, Co2+ chelataze                                                                                                                                                                                                                                                                                                                                                                                                                                                                                                                                                                                                             |
| Msmi740777 CDS CDS   | 13.5 | 4.0   | 15.3  | H   | COG4057                                                                                         | Methyl coenzyme M reductase, gamma subunit                                                                                                                                                                                                                                                                                                                                                                                                                                                                                                                                                                                                                      |
| TS29Clo3115 CDS CDS  | 13.0 | 4.0   | 14.8  | H   | COG2038 COG2087                                                                                 | NaMN:DMB phosphoribosyltransferase Adenosyl cobinamide kinase adenosyl cobinamide phosphate guanylyltransferase                                                                                                                                                                                                                                                                                                                                                                                                                                                                                                                                                 |
| TS29Met0802 CDS CDS  | 6.0  | 2.0   | 13.6  | H   | COG4063                                                                                         | Tetrahydromethanopterin S-methyltransferase, subunit A                                                                                                                                                                                                                                                                                                                                                                                                                                                                                                                                                                                                          |
| Bean0900 CDS CDS     | 3.0  | 1.0   | 13.6  | H   | COG1270                                                                                         | Cobalamin biosynthesis protein CbiD/CbiB                                                                                                                                                                                                                                                                                                                                                                                                                                                                                                                                                                                                                        |
| Msmi740484 CDS CDS   | 3.0  | 1.0   | 13.6  | H   | COG0054                                                                                         | Riboflavin synthase beta-chain                                                                                                                                                                                                                                                                                                                                                                                                                                                                                                                                                                                                                                  |
| Even1320 CDS CDS     | 3.0  | 1.0   | 13.6  | H   | COG0192                                                                                         | S-adenosylmethionine synthetase                                                                                                                                                                                                                                                                                                                                                                                                                                                                                                                                                                                                                                 |
| Buni0546 CDS CDS     | 3.0  | 1.0   | 13.6  | H   | COG2022 COG2104                                                                                 | Uncharacterized enzyme of thiazole biosynthesis Sulfur transfer protein involved in thiamine biosynthesis                                                                                                                                                                                                                                                                                                                                                                                                                                                                                                                                                       |
| Bthe7335450 CDS CDS  | 1.5  | 0.5   | 13.6  | H   | COG0302                                                                                         | GTP cyclohydrolase I                                                                                                                                                                                                                                                                                                                                                                                                                                                                                                                                                                                                                                            |
| TS28Rum04856 CDS CDS | 3.0  | 1.0   | 13.6  | H   | COG0196                                                                                         | FAD synthase                                                                                                                                                                                                                                                                                                                                                                                                                                                                                                                                                                                                                                                    |
| Bfin1127 CDS CDS     | 5.1  | 1.8   | 13.1  | H   | COG4206                                                                                         | Outer membrane cobalamin receptor protein                                                                                                                                                                                                                                                                                                                                                                                                                                                                                                                                                                                                                       |
| TS28Rum02364 CDS CDS | 43.7 | 15.3  | 13.0  | H   | COG4822                                                                                         | Cobalamin biosynthesis protein CbiK, Co2+ chelataze                                                                                                                                                                                                                                                                                                                                                                                                                                                                                                                                                                                                             |
| Aput0878 CDS CDS     | 11.0 | 4.0   | 12.5  | H   | COG0190                                                                                         | 5,10-methylene-tetrahydrofolate dehydrogenase/Methenyl tetrahydrofolate cyclohydrolase                                                                                                                                                                                                                                                                                                                                                                                                                                                                                                                                                                          |
| TS29Bac07332 CDS CDS | 31.0 | 11.5  | 12.2  | H   | COG0156                                                                                         | 7-keto-8-aminopelargolate synthetase and related enzymes                                                                                                                                                                                                                                                                                                                                                                                                                                                                                                                                                                                                        |
| Buni3284 CDS CDS     | 4.0  | 1.5   | 12.1  | H   | COG0502 COG0161                                                                                 | Biotin synthase and related enzymes Adenosylmethionine-8-amino-7-oxononanoate aminotransferase                                                                                                                                                                                                                                                                                                                                                                                                                                                                                                                                                                  |

|                      |      |       |      |       |                         |                                                                                                                             |
|----------------------|------|-------|------|-------|-------------------------|-----------------------------------------------------------------------------------------------------------------------------|
| Clep0851 CDS CDS     | 4.0  | 1.5   | 12.1 | H     | COG0192                 | S-adenosylmethionine synthetase                                                                                             |
| FrraM2121012 CDS CDS | 1.3  | 0.5   | 12.1 | H     | COG0388 COG0171         | Predicted amidohydrolase NAD synthase                                                                                       |
| Bsp1162030 CDS CDS   | 5.1  | 2.0   | 11.7 | H     | COG4206                 | Outer membrane cobalamin receptor protein                                                                                   |
| Bste0639 CDS CDS     | 5.1  | 2.0   | 11.7 | H     | COG4206                 | Outer membrane cobalamin receptor protein                                                                                   |
| Aput0643 CDS CDS     | 5.1  | 2.0   | 11.7 | H     | COG4206                 | Outer membrane cobalamin receptor protein                                                                                   |
| TS28Par0017 CDS CDS  | 5.1  | 2.0   | 11.7 | H     | COG4206                 | Outer membrane cobalamin receptor protein                                                                                   |
| Bthe3733898 CDS CDS  | 4.6  | 1.8   | 11.7 | H     | COG4206                 | Outer membrane cobalamin receptor protein                                                                                   |
| Bthe7332527 CDS CDS  | 4.6  | 1.8   | 11.7 | H     | COG4206                 | Outer membrane cobalamin receptor protein                                                                                   |
| Bova0454 CDS CDS     | 5.0  | 2.0   | 11.3 | H     | COG0142                 | Geranylgeranyl pyrophosphate synthase                                                                                       |
| ShigsnD90522 CDS CDS | 2.5  | 1.0   | 11.3 | H     | COG0156                 | 7-keto-8-aminopelargonate synthetase and related enzymes                                                                    |
| TS29Met0811 CDS CDS  | 17.0 | 7.0   | 11.0 | H     | COG4058                 | Methyl coenzyme M reductase, alpha subunit                                                                                  |
| Msmi740673 CDS CDS   | 62.0 | 26.0  | 10.8 | H     | COG1572 COG1429         | Uncharacterized conserved protein Cobalamin biosynthesis protein CobN and related Mg-chelataes                              |
| TS29Met0804 CDS CDS  | 7.0  | 3.0   | 10.6 | H     | COG4062                 | Tetrahydromethanopterin S-methyltransferase, subunit B                                                                      |
| TS28Rum02930 CDS CDS | 3.5  | 1.5   | 10.6 | H     | COG2091                 | Phosphopantetheinyl transferase                                                                                             |
| BactD11772 CDS CDS   | 2.3  | 1.0   | 10.6 | H     | COG0422                 | Thiamine biosynthesis protein ThiC                                                                                          |
| Buni2607 CDS CDS     | 1.1  | 0.5   | 10.4 | H     | COG0414                 | Panthothenate synthetase                                                                                                    |
| TS29Rum18453 CDS CDS | 50.7 | 22.3  | 10.3 | H     | COG4822                 | Cobalamin biosynthesis protein CbiK, Co2+ chelatae                                                                          |
| TS29Bac11507 CDS CDS | 3.0  | 1.3   | 10.2 | H     | COG1575                 | 1,4-dihydroxy-2-naphthoate octaprenyltransferase                                                                            |
| TS28Rum13361 CDS CDS | 9.0  | 4.0   | 10.2 | H     | COG0635                 | Coproporphyrinogen III oxidase and related Fe-S oxidoreductases                                                             |
| TS29Clo3033 CDS CDS  | 3.3  | 1.5   | 10.1 | H     | COG0192                 | S-adenosylmethionine synthetase                                                                                             |
| TS29Bif3990 CDS CDS  | 1.1  | 48.3  | 0.1  | H     | COG0192                 | S-adenosylmethionine synthetase                                                                                             |
| TS28Bif2030 CDS CDS  | 1.1  | 48.3  | 0.1  | H     | COG0192                 | S-adenosylmethionine synthetase                                                                                             |
| TS29Rum19401 CDS CDS | 1.0  | 48.0  | 0.1  | H     | COG2145                 | Hydroxyethylthiazole kinase, sugar kinase family                                                                            |
| TS29Rum14558 CDS CDS | 0.3  | 12.3  | 0.1  | H     | COG0307                 | Riboflavin synthase alpha chain                                                                                             |
| TS29Rum00452 CDS CDS | 1.0  | 54.0  | 0.1  | H     | COG0157                 | Nicotinate-nucleotide pyrophosphorylase                                                                                     |
| TS29Fae10496 CDS CDS | 1.0  | 54.0  | 0.1  | H     | COG0285 COG0294         | Folypolyglutamate synthase Dihydropterotate synthase and related enzymes                                                    |
| TS29Bac05452 CDS CDS | 0.3  | 18.0  | 0.1  | H     | COG0635                 | Coproporphyrinogen III oxidase and related Fe-S oxidoreductases                                                             |
| TS29Rum00464 CDS CDS | 1.0  | 55.5  | 0.1  | H     | COG0635                 | Coproporphyrinogen III oxidase and related Fe-S oxidoreductases                                                             |
| TS29Rum20157 CDS CDS | 1.0  | 59.0  | 0.1  | H     | COG0007 COG1648 COG1587 | Uroporphyrinogen-III methylase Siroheme synthase (precorrin-2 oxidase/ferrochelatase domain) Uroporphyrinogen-III synthase  |
| TS29Rum13454 CDS CDS | 0.5  | 29.5  | 0.1  | H     | COG0807                 | GTP cyclohydrolase II                                                                                                       |
| TS29Fae10007 CDS CDS | 0.5  | 29.5  | 0.1  | H     | COG1713                 | Predicted HD superfamily hydrolase involved in NAD metabolism                                                               |
| TS29Bif3308 CDS CDS  | 0.3  | 14.8  | 0.1  | H     | COG1057 COG1713         | Nicotinic acid mononucleotide adenyltransferase Predicted HD superfamily hydrolase involved in NAD metabolism               |
| TS29Fae00313 CDS CDS | 1.0  | 60.0  | 0.1  | H     | COG0192                 | S-adenosylmethionine synthetase                                                                                             |
| TS29Rum18775 CDS CDS | 0.3  | 20.0  | 0.1  | H     | COG0001                 | Glutamate-1-semialdehyde aminotransferase                                                                                   |
| TS29Rum00353 CDS CDS | 0.5  | 31.0  | 0.1  | H     | COG0535 COG2226         | Predicted Fe-S oxidoreductases Methylase involved in ubiquinone/menaquinone biosynthesis                                    |
| TS28Bif0717 CDS CDS  | 0.3  | 16.2  | 0.1  | H     | COG0302                 | GTP cyclohydrolase I                                                                                                        |
| TS29Fae08158 CDS CDS | 1.0  | 66.0  | 0.1  | H     | COG0635                 | Coproporphyrinogen III oxidase and related Fe-S oxidoreductases                                                             |
| TS29Bif0702 CDS CDS  | 1.5  | 104.0 | 0.1  | H     | COG1232                 | Protoporphyrinogen oxidase                                                                                                  |
| TS29Bif3878 CDS CDS  | 0.8  | 52.2  | 0.1  | H     | COG0302                 | GTP cyclohydrolase I                                                                                                        |
| TS28Bif0419 CDS CDS  | 0.3  | 18.5  | 0.1  | H     | COG0669                 | Phosphopantetheinyl transferase                                                                                             |
| TS29Rum00451 CDS CDS | 1.0  | 82.0  | 0.1  | H     | COG0029 COG0157         | Aspartate oxidase Nicotinate-nucleotide pyrophosphorylase                                                                   |
| TS29Bif4142 CDS CDS  | 0.2  | 20.1  | 0.0  | H     | COG0351 COG0352 COG1992 | Hydroxymethylpyrimidine/phosphomethylpyrimidine kinase Thiamine monophosphate synthase Uncharacterized conserved protein    |
| TS29Fae01154 CDS CDS | 0.5  | 54.5  | 0.0  | H     | COG2241 COG2242         | Precorrin-6B methylase I Precorrin-6B methylase 2                                                                           |
| TS29Bif2464 CDS CDS  | 1.2  | 142.0 | 0.0  | H     | COG0285 COG0294         | Folypolyglutamate synthase Dihydropterotate synthase and related enzymes                                                    |
| TS29Bif3430 CDS CDS  | 0.5  | 66.0  | 0.0  | H     | COG0311                 | Predicted glutamine amidotransferase involved in pyridoxine biosynthesis                                                    |
| TS28Bif4959 CDS CDS  | 0.5  | 72.2  | 0.0  | H     | COG0095                 | Lipoate-protein ligase A                                                                                                    |
| TS28Bif0595 CDS CDS  | 0.3  | 37.8  | 0.0  | H     | COG0388 COG0171         | Predicted amidohydrolase NAD synthase                                                                                       |
| TS28Bif5000 CDS CDS  | 0.2  | 33.1  | 0.0  | H     | COG0351 COG0352 COG1992 | Hydroxymethylpyrimidine/phosphomethylpyrimidine kinase Thiamine monophosphate synthase Uncharacterized conserved protein    |
| TS29Bif4144 CDS CDS  | 0.6  | 163.3 | 0.0  | H     | COG0422                 | Thiamine biosynthesis protein ThiC                                                                                          |
| TS29Bif3055 CDS CDS  | 0.3  | 83.8  | 0.0  | H     | COG0388 COG0171         | Predicted amidohydrolase NAD synthase                                                                                       |
| Dlon2243 CDS CDS     | 3.0  | 1.0   | 13.6 | H C   | COG0543                 | 2-polyprenylphenol hydroxylase and related flavodoxin oxidoreductases                                                       |
| RimL12759 CDS CDS    | 5.0  | 2.0   | 11.3 | H C   | COG0543                 | 2-polyprenylphenol hydroxylase and related flavodoxin oxidoreductases                                                       |
| Ren0524 CDS CDS      | 4.5  | 2.0   | 10.2 | H C   | COG0543                 | 2-polyprenylphenol hydroxylase and related flavodoxin oxidoreductases                                                       |
| CspSS20024 CDS CDS   | 5.0  | 1.0   | 22.7 | H C F | COG1146 COG0543 COG0167 | Ferredoxin 2-polyprenylphenol hydroxylase and related flavodoxin oxidoreductases Dihydroorotate dehydrogenase               |
| Cbol3220 CDS CDS     | 8.0  | 3.0   | 12.1 | H C F | COG1146 COG0543 COG0167 | Ferredoxin 2-polyprenylphenol hydroxylase and related flavodoxin oxidoreductases Dihydroorotate dehydrogenase               |
| Robe1910 CDS CDS     | 2.5  | 1.0   | 11.3 | H C F | COG1146 COG0543 COG0167 | Ferredoxin 2-polyprenylphenol hydroxylase and related flavodoxin oxidoreductases Dihydroorotate dehydrogenase               |
| Buni1281 CDS CDS     | 4.7  | 1.3   | 15.9 | H F   | COG1160 COG0283 COG0414 | Predicted GTPases Cytidylate kinase Panthothenate synthetase                                                                |
| Cmet2013 CDS CDS     | 3.0  | 1.0   | 13.6 | H I   | COG1154                 | Deoxyxylulose-5-phosphate synthase                                                                                          |
| Buni2793 CDS CDS     | 2.3  | 1.0   | 10.6 | H I   | COG1154                 | Deoxyxylulose-5-phosphate synthase                                                                                          |
| Buni1583 CDS CDS     | 1.5  | 0.5   | 13.6 | H Q   | COG3321 COG0156         | Polyketide synthase modules and related proteins 7-keto-8-aminopelargonate synthetase and related enzymes                   |
| TS29Rum10996 CDS CDS | 22.0 | 1.0   | 99.9 | I     | COG1250                 | 3-hydroxyacyl-CoA dehydrogenase                                                                                             |
| BactD10948 CDS CDS   | 4.8  | 0.3   | 86.3 | I     | COG4799                 | Acetyl-CoA carboxylase, carboxyltransferase component (subunits alpha and beta)                                             |
| Bxy14296 CDS CDS     | 4.8  | 0.3   | 86.3 | I     | COG4799                 | Acetyl-CoA carboxylase, carboxyltransferase component (subunits alpha and beta)                                             |
| Buni1120 CDS CDS     | 28.4 | 1.5   | 86.0 | I     | COG4799                 | Acetyl-CoA carboxylase, carboxyltransferase component (subunits alpha and beta)                                             |
| Bxyl4163 CDS CDS     | 8.1  | 0.5   | 73.5 | I     | COG1260                 | Myo-inositol-1-phosphate synthase                                                                                           |
| TS28Clo03439 CDS CDS | 12.0 | 1.0   | 54.5 | I     | COG0183                 | Acetyl-CoA acetyltransferase                                                                                                |
| Ceut0481 CDS CDS     | 4.2  | 0.4   | 43.1 | I     | COG1502                 | Phosphatidylserine phosphatidylglycerophosphate cardiolipin synthases and related enzymes                                   |
| Buni1308 CDS CDS     | 13.5 | 1.5   | 40.9 | I     | COG2185 COG1884         | Methylmalonyl-CoA mutase, C-terminal domain/subunit (cobalamin-binding) Methylmalonyl-CoA mutase, N-terminal domain/subunit |
| TS29Par544 CDS CDS   | 8.0  | 1.0   | 36.3 | I     | COG0365                 | Acyl-coenzyme A synthetases AMP-(fatty) acid ligases                                                                        |
| RimL12222 CDS CDS    | 15.3 | 2.0   | 34.6 | I     | COG0183                 | Acetyl-CoA acetyltransferase                                                                                                |
| Acae0254 CDS CDS     | 7.0  | 1.0   | 31.8 | I     | COG1024 COG1250         | Enoyl-CoA hydratase carnitine racemase 3-hydroxyacyl-CoA dehydrogenase                                                      |
| Rtor1700 CDS CDS     | 3.5  | 0.5   | 31.8 | I     | COG0657                 | Esterase/lipase                                                                                                             |
| Rumhyd2644 CDS CDS   | 7.0  | 1.0   | 31.8 | I     | COG0416                 | Fatty acid/phospholipid biosynthesis enzyme                                                                                 |
| Buni1109 CDS CDS     | 17.0 | 2.5   | 30.9 | I     | COG1260                 | Myo-inositol-1-phosphate synthase                                                                                           |
| TS28Bac5633 CDS CDS  | 8.7  | 1.3   | 29.5 | I     | COG0332                 | 3-oxoacyl-[acyl-carrier-protein] synthase III                                                                               |
| CspM6212613 CDS CDS  | 25.0 | 4.0   | 28.4 | I     | COG1250                 | 3-hydroxyacyl-CoA dehydrogenase                                                                                             |
| Ccom1707 CDS CDS     | 34.0 | 5.5   | 28.1 | I     | COG0416                 | Fatty acid/phospholipid biosynthesis enzyme                                                                                 |
| Casp1260 CDS CDS     | 6.0  | 1.0   | 27.2 | I     | COG0657                 | Esterase/lipase                                                                                                             |
| Csym2028 CDS CDS     | 18.0 | 3.0   | 27.2 | I     | COG4799                 | Acetyl-CoA carboxylase, carboxyltransferase component (subunits alpha and beta)                                             |

|                      |      |       |       |     |                         |                                                                                                                                                      |
|----------------------|------|-------|-------|-----|-------------------------|------------------------------------------------------------------------------------------------------------------------------------------------------|
| Cspl21154 CDS CDS    | 5.9  | 1.0   | 25.7  | I   | COG1502                 | Phosphatidylserine/phosphatidylglycerophosphate/cardioliipin synthases and related enzymes                                                           |
| TS28Fae18586 CDS CDS | 24.0 | 4.5   | 24.2  | I   | COG0183                 | Acetyl-CoA acetyltransferase                                                                                                                         |
| TS28Fae18583 CDS CDS | 31.8 | 6.0   | 24.1  | I   | COG1250                 | 3-hydroxyacyl-CoA dehydrogenase                                                                                                                      |
| Chvl0440 CDS CDS     | 2.5  | 0.5   | 22.7  | I   | COG0416                 | Fatty acid/phospholipid biosynthesis enzyme                                                                                                          |
| Clepl1437 CDS CDS    | 2.5  | 0.5   | 22.7  | I   | COG0332                 | 3-oxoacyl-[acyl-carrier-protein] synthase III                                                                                                        |
| TS28Cl09644 CDS CDS  | 2.5  | 0.5   | 22.7  | I   | COG0332                 | 3-oxoacyl-[acyl-carrier-protein] synthase III                                                                                                        |
| TS29Bac08436 CDS CDS | 1.3  | 0.3   | 22.7  | I   | COG1022                 | Long-chain acyl-CoA synthetases (AMP-forming)                                                                                                        |
| Bova3226 CDS CDS     | 4.9  | 1.0   | 22.2  | I   | COG1260                 | Myo-inositol-1-phosphate synthase                                                                                                                    |
| BactD10050 CDS CDS   | 3.1  | 0.7   | 21.3  | I   | COG0332                 | 3-oxoacyl-[acyl-carrier-protein] synthase III                                                                                                        |
| TS28Fae20273 CDS CDS | 15.3 | 3.5   | 19.9  | I   | COG0183                 | Acetyl-CoA acetyltransferase                                                                                                                         |
| Robe0362 CDS CDS     | 4.0  | 1.0   | 18.2  | I   | COG0020                 | Undecaprenyl pyrophosphate synthase                                                                                                                  |
| BDI0368 CDS Xylanase | 4.0  | 1.0   | 18.2  | I   | COG0657                 | Esterase/lipase                                                                                                                                      |
| TS28Eub0146 CDS CDS  | 8.0  | 2.0   | 18.2  | I   | COG1024 COG1250         | Enoyl-CoA hydratase/carnithine racemase/3-hydroxyacyl-CoA dehydrogenase                                                                              |
| TS29Bac07191 CDS CDS | 4.0  | 1.0   | 18.2  | I   | COG0688                 | Phosphatidylserine decarboxylase                                                                                                                     |
| Bova3359 CDS CDS     | 4.8  | 1.3   | 17.3  | I   | COG4799                 | Acetyl-CoA carboxylase, carboxyltransferase component (subunits alpha and beta)                                                                      |
| Bum0342 CDS CDS      | 7.6  | 2.0   | 17.2  | I   | COG0365                 | Acyl-coenzyme A synthetases/AMP-(fatty) acid ligases                                                                                                 |
| Cbol1693 CDS CDS     | 14.8 | 4.0   | 16.8  | I   | COG0416                 | Fatty acid/phospholipid biosynthesis enzyme                                                                                                          |
| TS28Fae20637 CDS CDS | 51.8 | 14.5  | 16.2  | I   | COG1250                 | 3-hydroxyacyl-CoA dehydrogenase                                                                                                                      |
| TS28Cl04161 CDS CDS  | 10.0 | 3.0   | 15.1  | I   | COG1250                 | 3-hydroxyacyl-CoA dehydrogenase                                                                                                                      |
| TS28Fae20636 CDS CDS | 26.2 | 8.5   | 14.0  | I   | COG1024 COG1250         | Enoyl-CoA hydratase/carnithine racemase/3-hydroxyacyl-CoA dehydrogenase                                                                              |
| TS28Rum15679 CDS CDS | 1.5  | 0.5   | 13.6  | I   | COG0671                 | Membrane-associated phospholipid phosphatase                                                                                                         |
| TS28Rum12255 CDS CDS | 6.0  | 2.0   | 13.6  | I   | COG2272                 | Carboxylesterase type B                                                                                                                              |
| ShigspD92111 CDS CDS | 1.5  | 0.5   | 13.6  | I   | COG1502                 | Phosphatidylserine/phosphatidylglycerophosphate/cardioliipin synthases and related enzymes                                                           |
| TS28Dor0781 CDS CDS  | 3.0  | 1.0   | 13.6  | I   | COG0416                 | Fatty acid/phospholipid biosynthesis enzyme                                                                                                          |
| TS28Col0176 CDS CDS  | 9.0  | 3.0   | 13.6  | I   | COG0183                 | Acetyl-CoA acetyltransferase                                                                                                                         |
| TS28Fae00074 CDS CDS | 10.0 | 3.5   | 13.0  | I   | COG4799                 | Acetyl-CoA carboxylase, carboxyltransferase component (subunits alpha and beta)                                                                      |
| TS28Fae20697 CDS CDS | 2.7  | 1.0   | 12.1  | I   | COG4799                 | Acetyl-CoA carboxylase, carboxyltransferase component (subunits alpha and beta)                                                                      |
| Aput1196 CDS CDS     | 10.5 | 4.0   | 11.9  | I   | COG2185 COG1884         | Methylmalonyl-CoA mutase, C-terminal domain/subunit (cobalamin-binding) Methylmalonyl-CoA mutase, N-terminal domain/subunit                          |
| Bova3381 CDS CDS     | 1.3  | 0.5   | 11.8  | I   | COG0623                 | Enoyl-[acyl-carrier-protein] reductase (NADH)                                                                                                        |
| Bxvl3046 CDS CDS     | 1.3  | 0.5   | 11.8  | I   | COG0623                 | Enoyl-[acyl-carrier-protein] reductase (NADH)                                                                                                        |
| Bum2290 CDS CDS      | 8.7  | 3.3   | 11.8  | I   | COG0332                 | 3-oxoacyl-[acyl-carrier-protein] synthase III                                                                                                        |
| Dfor0619 CDS CDS     | 25.3 | 10.0  | 11.5  | I   | COG0416                 | Fatty acid/phospholipid biosynthesis enzyme                                                                                                          |
| TS28Cl06731 CDS CDS  | 5.0  | 2.0   | 11.3  | I   | COG0365                 | Acyl-coenzyme A synthetases/AMP-(fatty) acid ligases                                                                                                 |
| Aput1966 CDS CDS     | 15.0 | 6.0   | 11.3  | I   | COG0821                 | Enzyme involved in the deoxyxylulose pathway of isoprenoid biosynthesis                                                                              |
| TS29Bac09616 CDS CDS | 5.7  | 2.3   | 11.0  | I   | COG2185 COG1884         | Methylmalonyl-CoA mutase, C-terminal domain/subunit (cobalamin-binding) Methylmalonyl-CoA mutase, N-terminal domain/subunit                          |
| Bum0348 CDS CDS      | 3.5  | 1.5   | 10.6  | I   | COG0020                 | Undecaprenyl pyrophosphate synthase                                                                                                                  |
| Aput1559 CDS CDS     | 14.0 | 6.0   | 10.6  | I   | COG4799                 | Acetyl-CoA carboxylase, carboxyltransferase component (subunits alpha and beta)                                                                      |
| TS29Bif1296 CDS CDS  | 0.3  | 15.5  | 0.1   | I   | COG4221 COG1211         | Short-chain alcohol dehydrogenase of unknown specificity/4-diphosphocytidyl-2-methyl-D-erythritol synthase                                           |
| CspM6210568 CDS CDS  | 2.9  | 142.0 | 0.1   | I   | COG1502                 | Phosphatidylserine/phosphatidylglycerophosphate/cardioliipin synthases and related enzymes                                                           |
| TS29Col1489 CDS CDS  | 1.0  | 50.0  | 0.1   | I   | COG2084                 | 3-hydroxyisobutyrate dehydrogenase and related beta-hydroxyacid dehydrogenases                                                                       |
| TS29Bac01857 CDS CDS | 0.5  | 25.0  | 0.1   | I   | COG0332                 | 3-oxoacyl-[acyl-carrier-protein] synthase III                                                                                                        |
| TS29Bif2696 CDS CDS  | 1.5  | 76.1  | 0.1   | I   | COG1022                 | Long-chain acyl-CoA synthetases (AMP-forming)                                                                                                        |
| TS29Bif4129 CDS CDS  | 1.5  | 77.0  | 0.1   | I   | COG0020                 | Undecaprenyl pyrophosphate synthase                                                                                                                  |
| TS29Rum01464 CDS CDS | 0.5  | 26.0  | 0.1   | I   | COG0439                 | Biotin carboxylase                                                                                                                                   |
| TS28Bif0631 CDS CDS  | 1.0  | 56.7  | 0.1   | I   | COG1022                 | Long-chain acyl-CoA synthetases (AMP-forming)                                                                                                        |
| TS28Bif0934 CDS CDS  | 0.8  | 43.1  | 0.1   | I   | COG4982 COG4981         | 3-oxoacyl-[acyl-carrier-protein] reductase Enoyl reductase domain of yeast-type FAS1                                                                 |
| TS29Col0912 CDS CDS  | 0.5  | 29.0  | 0.1   | I   | COG1597                 | Sphingosine kinase and enzymes related to eukaryotic diacylglycerol kinase                                                                           |
| TS29Eae00646 CDS CDS | 0.5  | 32.5  | 0.1   | I   | COG2267                 | Lysophospholipase                                                                                                                                    |
| TS28Bif0551 CDS CDS  | 0.5  | 35.9  | 0.1   | I   | COG0657                 | Esterase/lipase                                                                                                                                      |
| TS29Bif0438 CDS CDS  | 0.5  | 35.9  | 0.1   | I   | COG0657                 | Esterase/lipase                                                                                                                                      |
| TS28Bif4503 CDS CDS  | 0.5  | 36.3  | 0.1   | I   | COG2267                 | Lysophospholipase                                                                                                                                    |
| TS28Bif3336 CDS CDS  | 0.3  | 20.3  | 0.1   | I   | COG0558                 | Phosphatidylglycerophosphate synthase                                                                                                                |
| TS29Rum11767 CDS CDS | 0.5  | 42.5  | 0.1   | I   | COG3884                 | Acyl-ACP thioesterase                                                                                                                                |
| TS29Bif3960 CDS CDS  | 4.3  | 368.7 | 0.1   | I   | COG3581 COG3580 COG1924 | Uncharacterized protein conserved in bacteria Activator of 2-hydroxyglutaryl-CoA dehydratase (HSP70-class ATPase domain)                             |
| TS29Bac05147 CDS CDS | 0.3  | 22.0  | 0.1   | I   | COG0657                 | Esterase/lipase                                                                                                                                      |
| TS29Bif2345 CDS CDS  | 0.3  | 29.7  | 0.1   | I   | COG0821                 | Enzyme involved in the deoxyxylulose pathway of isoprenoid biosynthesis                                                                              |
| TS29Bif0533 CDS CDS  | 0.5  | 52.3  | 0.0   | I   | COG2267                 | Lysophospholipase                                                                                                                                    |
| TS29Bif3953 CDS CDS  | 1.0  | 112.2 | 0.0   | I   | COG1022                 | Long-chain acyl-CoA synthetases (AMP-forming)                                                                                                        |
| TS29Col1437 CDS CDS  | 0.5  | 56.5  | 0.0   | I   | COG1835                 | Predicted acyltransferases                                                                                                                           |
| TS29Col0136 CDS CDS  | 1.0  | 120.0 | 0.0   | I   | COG3581 COG3580 COG1924 | Uncharacterized protein conserved in bacteria Activator of 2-hydroxyglutaryl-CoA dehydratase (HSP70-class ATPase domain)                             |
| TS28Bif5375 CDS CDS  | 0.5  | 62.1  | 0.0   | I   | COG1835                 | Predicted acyltransferases                                                                                                                           |
| FpraM2120014 CDS CDS | 0.2  | 40.4  | 0.0   | I   | COG1502                 | Phosphatidylserine/phosphatidylglycerophosphate/cardioliipin synthases and related enzymes                                                           |
| TS29Bif2374 CDS CDS  | 0.5  | 108.3 | 0.0   | I   | COG4799                 | Acetyl-CoA carboxylase, carboxyltransferase component (subunits alpha and beta)                                                                      |
| TS29Bif3077 CDS CDS  | 0.5  | 111.6 | 0.0   | I   | COG1835                 | Predicted acyltransferases                                                                                                                           |
| TS29Fae06010 CDS CDS | 0.1  | 25.4  | 0.0   | I   | COG1502                 | Phosphatidylserine/phosphatidylglycerophosphate/cardioliipin synthases and related enzymes                                                           |
| TS28Bif4811 CDS CDS  | 0.3  | 73.5  | 0.0   | I   | COG0657                 | Esterase/lipase                                                                                                                                      |
| TS29Col0144 CDS CDS  | 1.0  | 60.0  | 0.1   | I H | COG1154                 | Deoxyxylulose-5-phosphate synthase                                                                                                                   |
| TS28Rum14309 CDS CDS | 2.0  | 0.5   | 18.2  | I J | COG1211 COG0336 COG0245 | 4-diphosphocytidyl-2-methyl-D-erythritol synthase (tRNA-(guanine-N1)-methyltransferase) 2C-methyl-D-erythritol 2,4-cyclodiphosphate synthase         |
| Bthe7333249 CDS CDS  | 16.0 | 0.7   | 109.0 | I O | COG0236                 | Acyl carrier protein                                                                                                                                 |
| Cbol4432 CDS CDS     | 45.0 | 2.0   | 102.1 | I Q | COG1028                 | Dehydrogenases with different specificities (related to short-chain alcohol dehydrogenases)                                                          |
| Ccom2044 CDS CDS     | 30.0 | 2.0   | 68.1  | I Q | COG0304                 | 3-oxoacyl-(acyl-carrier-protein) synthase                                                                                                            |
| TS29Dor0403 CDS CDS  | 9.0  | 1.0   | 40.9  | I Q | COG1028 COG4221         | Dehydrogenases with different specificities (related to short-chain alcohol dehydrogenases) Short-chain alcohol dehydrogenase of unknown specificity |
| Bxvl2435 CDS CDS     | 9.8  | 1.3   | 33.5  | I Q | COG0236                 | Acyl carrier protein                                                                                                                                 |
| BactD13824 CDS CDS   | 9.8  | 1.3   | 33.5  | I Q | COG0236                 | Acyl carrier protein                                                                                                                                 |

|                       |      |       |       |     |                                         |                                                                                                                                                                                                                             |
|-----------------------|------|-------|-------|-----|-----------------------------------------|-----------------------------------------------------------------------------------------------------------------------------------------------------------------------------------------------------------------------------|
| BactD13279 CDS CDS    | 3.4  | 0.5   | 30.9  | I Q | COG0318 COG1022                         | Acyl-CoA synthetases (AMP-forming)/AMP-acid ligases II Long-chain acyl-CoA synthetases (AMP-forming)                                                                                                                        |
| TS28Rum13339 CDS CDS  | 4.5  | 1.0   | 20.4  | I Q | COG0236                                 | Acyl carrier protein                                                                                                                                                                                                        |
| TS28Rum13342 CDS CDS  | 2.0  | 0.5   | 18.2  | I Q | COG1028                                 | Dehydrogenases with different specificities (related to short-chain alcohol dehydrogenases)                                                                                                                                 |
| TS28Bac2683 CDS CDS   | 1.0  | 0.3   | 13.6  | I Q | COG1028                                 | Dehydrogenases with different specificities (related to short-chain alcohol dehydrogenases)                                                                                                                                 |
| Msmi741306 CDS CDS    | 1.0  | 0.3   | 13.6  | I Q | COG1028                                 | Dehydrogenases with different specificities (related to short-chain alcohol dehydrogenases)                                                                                                                                 |
| Buni1284 CDS CDS      | 1.0  | 0.3   | 13.6  | I Q | COG1028                                 | Dehydrogenases with different specificities (related to short-chain alcohol dehydrogenases)                                                                                                                                 |
| Msmi750377 CDS CDS    | 1.0  | 0.3   | 13.6  | I Q | COG1028                                 | Dehydrogenases with different specificities (related to short-chain alcohol dehydrogenases)                                                                                                                                 |
| Csci2462 CDS CDS      | 3.0  | 1.0   | 13.6  | I Q | COG1028                                 | Dehydrogenases with different specificities (related to short-chain alcohol dehydrogenases)                                                                                                                                 |
| TS29Clo3876 CDS CDS   | 6.0  | 2.0   | 13.6  | I Q | COG0236                                 | Acyl carrier protein                                                                                                                                                                                                        |
| TS28Bac3746 CDS CDS   | 4.0  | 1.3   | 13.6  | I Q | COG1028                                 | Dehydrogenases with different specificities (related to short-chain alcohol dehydrogenases)                                                                                                                                 |
| TS28Fae11131 CDS CDS  | 22.6 | 8.5   | 12.1  | I Q | COG1028                                 | Dehydrogenases with different specificities (related to short-chain alcohol dehydrogenases)                                                                                                                                 |
| Dfor3139 CDS CDS      | 5.0  | 2.0   | 11.3  | I Q | COG1028                                 | Dehydrogenases with different specificities (related to short-chain alcohol dehydrogenases)                                                                                                                                 |
| Buni1916 CDS CDS      | 5.7  | 2.3   | 11.0  | I Q | COG1028                                 | Dehydrogenases with different specificities (related to short-chain alcohol dehydrogenases)                                                                                                                                 |
| TS29Bif0600 CDS CDS   | 0.4  | 21.3  | 0.1   | I Q | COG1028                                 | Dehydrogenases with different specificities (related to short-chain alcohol dehydrogenases)                                                                                                                                 |
| TS28Bif1169 CDS CDS   | 0.4  | 21.3  | 0.1   | I Q | COG1028                                 | Dehydrogenases with different specificities (related to short-chain alcohol dehydrogenases)                                                                                                                                 |
| TS28Fae18321 CDS CDS  | 0.2  | 12.0  | 0.1   | I Q | COG1028                                 | Dehydrogenases with different specificities (related to short-chain alcohol dehydrogenases)                                                                                                                                 |
| BL1537 CDS Fas        | 1.0  | 120.1 | 0.0   | I Q | COG0331 COG3321 COG0304 COG4982 COG4981 | (acyl-carrier-protein) S-malonyltransferase Polyketide synthase modules and related proteins 3-oxoacyl-(acyl-carrier-protein) synthase 3-oxoacyl-[acyl-carrier protein] reductase Enoyl reductase domain of yeast-type FAS1 |
| Robe0065 CDS CDS      | 0.3  | 55.6  | 0.0   | I Q | COG1028                                 | Dehydrogenases with different specificities (related to short-chain alcohol dehydrogenases)                                                                                                                                 |
| TS28Bif0933 CDS CDS   | 0.3  | 78.9  | 0.0   | I Q | COG0304 COG0331 COG3321 COG4982 COG4981 | 3-oxoacyl-(acyl-carrier-protein) synthase acyl-carrier-protein S-malonyltransferase Polyketide synthase modules and related proteins 3-oxoacyl-[acyl-carrier protein] reductase Enoyl reductase domain of yeast-type FAS1   |
| TS29Bif2375 CDS CDS   | 1.0  | 545.0 | 0.0   | I Q | COG0304 COG0331 COG3321 COG4982 COG4981 | 3-oxoacyl-(acyl-carrier-protein) synthase acyl-carrier-protein S-malonyltransferase Polyketide synthase modules and related proteins 3-oxoacyl-[acyl-carrier protein] reductase Enoyl reductase domain of yeast-type FAS1   |
| Bthe7330382 CDS CDS   | 41.6 | 0.5   | 377.9 | J   | COG0097                                 | Ribosomal protein L6P/L9E                                                                                                                                                                                                   |
| Bthe7330390 CDS CDS   | 8.5  | 0.2   | 231.5 | J   | COG0099                                 | Ribosomal protein S13                                                                                                                                                                                                       |
| Bthe7371272 CDS CDS   | 8.5  | 0.2   | 231.5 | J   | COG0099                                 | Ribosomal protein S13                                                                                                                                                                                                       |
| Bfin3125 CDS CDS      | 8.5  | 0.2   | 192.9 | J   | COG0480                                 | Translation elongation factors (GTPases)                                                                                                                                                                                    |
| Buni0625 CDS CDS      | 56.9 | 1.5   | 172.1 | J   | COG0050                                 | GTPases - translation elongation factors                                                                                                                                                                                    |
| TS29Fae00136 CDS CDS  | 17.3 | 0.5   | 157.4 | J   | COG1544                                 | Ribosome-associated protein Y (PSRp-1)                                                                                                                                                                                      |
| CspSS21228 CDS CDS    | 16.5 | 0.5   | 149.8 | J   | COG0050                                 | GTPases - translation elongation factors                                                                                                                                                                                    |
| Bege2622 CDS CDS      | 16.0 | 0.5   | 145.3 | J   | COG0186                                 | Ribosomal protein S17                                                                                                                                                                                                       |
| TS28Met1810 CDS CDS   | 5.9  | 0.2   | 133.9 | J   | COG0081                                 | Ribosomal protein L1                                                                                                                                                                                                        |
| Buni3377 CDS CDS      | 9.7  | 0.3   | 131.7 | J   | COG0008 COG0064                         | Glutamyl- and glutamyl-tRNA synthetases Asp-tRNA <sup>Asn</sup> /Glu-tRNA <sup>Gln</sup> amidotransferase B subunit (PET112 homolog)                                                                                        |
| Buni1600 CDS CDS      | 14.4 | 0.5   | 130.5 | J   | COG0441                                 | Threonyl-tRNA synthetase                                                                                                                                                                                                    |
| Msmi751413 CDS CDS    | 5.4  | 0.2   | 122.6 | J   | COG0081                                 | Ribosomal protein L1                                                                                                                                                                                                        |
| Bhan0175 CDS CDS      | 26.6 | 1.0   | 120.9 | J   | COG0050                                 | GTPases - translation elongation factors                                                                                                                                                                                    |
| Bthe7330386 CDS CDS   | 25.7 | 1.0   | 116.8 | J   | COG0200                                 | Ribosomal protein L15                                                                                                                                                                                                       |
| TS28Rum08442 CDS CDS  | 12.8 | 0.5   | 116.5 | J   | COG2868                                 | Predicted ribosomal protein                                                                                                                                                                                                 |
| TS28Fae20651 CDS CDS  | 12.8 | 0.5   | 115.8 | J   | COG0049                                 | Ribosomal protein S7                                                                                                                                                                                                        |
| BactD20045 CDS CDS    | 12.5 | 0.6   | 94.5  | J   | COG0092                                 | Ribosomal protein S3                                                                                                                                                                                                        |
| TS28Fae15009 CDS CDS  | 9.5  | 0.5   | 86.3  | J   | COG0335                                 | Ribosomal protein L19                                                                                                                                                                                                       |
| TS29Bac10597 CDS CDS  | 9.3  | 0.5   | 84.1  | J   | COG0230                                 | Ribosomal protein L34                                                                                                                                                                                                       |
| TS28Rum11480 CDS CDS  | 27.0 | 1.5   | 81.8  | J   | COG0096                                 | Ribosomal protein S8                                                                                                                                                                                                        |
| Dlon0694 CDS CDS      | 17.0 | 1.0   | 77.2  | J   | COG0291                                 | Ribosomal protein L35                                                                                                                                                                                                       |
| Robe1738 CDS CDS      | 16.5 | 1.0   | 74.9  | J   | COG0186                                 | Ribosomal protein S17                                                                                                                                                                                                       |
| BactD12743 CDS CDS    | 5.4  | 0.3   | 73.1  | J   | COG0172                                 | Seryl-tRNA synthetase                                                                                                                                                                                                       |
| Bthe7330383 CDS CDS   | 23.8 | 1.5   | 72.1  | J   | COG0256                                 | Ribosomal protein L18                                                                                                                                                                                                       |
| TS29Bac09455 CDS CDS  | 15.7 | 1.0   | 71.1  | J   | COG0091                                 | Ribosomal protein L22                                                                                                                                                                                                       |
| TS28Dor0304 CDS CDS   | 61.5 | 4.0   | 69.8  | J   | COG0180                                 | Tryptophanyl-tRNA synthetase                                                                                                                                                                                                |
| Buni2672 CDS CDS      | 12.7 | 0.8   | 69.0  | J   | COG0216                                 | Protein chain release factor A                                                                                                                                                                                              |
| Buni0620 CDS CDS      | 45.2 | 3.0   | 68.3  | J   | COG0480                                 | Translation elongation factors (GTPases)                                                                                                                                                                                    |
| TS28Fae01959 CDS CDS  | 51.7 | 3.5   | 67.1  | J   | COG0050                                 | GTPases - translation elongation factors                                                                                                                                                                                    |
| Bxvl1669 CDS CDS      | 14.8 | 1.0   | 67.0  | J   | COG0256                                 | Ribosomal protein L18                                                                                                                                                                                                       |
| BactD14464 CDS CDS    | 14.8 | 1.0   | 67.0  | J   | COG0256                                 | Ribosomal protein L18                                                                                                                                                                                                       |
| Bxvl1670 CDS CDS      | 14.1 | 1.0   | 63.9  | J   | COG0097                                 | Ribosomal protein L6P/L9E                                                                                                                                                                                                   |
| Bcap2256 CDS CDS      | 14.0 | 1.0   | 63.6  | J   | COG0089                                 | Ribosomal protein L23                                                                                                                                                                                                       |
| Bxvl1668 CDS CDS      | 6.7  | 0.5   | 60.8  | J   | COG0098                                 | Ribosomal protein S5                                                                                                                                                                                                        |
| TS28Eub0672 CDS CDS   | 6.5  | 0.5   | 59.0  | J   | COG0102                                 | Ribosomal protein L13                                                                                                                                                                                                       |
| Ehal0507 CDS CDS      | 6.5  | 0.5   | 59.0  | J   | COG0102                                 | Ribosomal protein L13                                                                                                                                                                                                       |
| TS28Rum15873 CDS CDS  | 12.8 | 1.0   | 58.3  | J   | COG0089                                 | Ribosomal protein L23                                                                                                                                                                                                       |
| TS28Rum00047 CDS CDS  | 44.2 | 3.5   | 57.3  | J   | COG1544                                 | Ribosome-associated protein Y (PSRp-1)                                                                                                                                                                                      |
| BactD14438 CDS CDS    | 33.5 | 2.7   | 56.9  | J   | COG0050                                 | GTPases - translation elongation factors                                                                                                                                                                                    |
| TS28Fae1958 CDS CDS   | 6.3  | 0.5   | 56.7  | J   | COG0091                                 | Ribosomal protein L22                                                                                                                                                                                                       |
| Robe2987 CDS CDS      | 6.3  | 0.5   | 56.7  | J   | COG0360                                 | Ribosomal protein S6                                                                                                                                                                                                        |
| Dlon0184 CDS CDS      | 12.2 | 1.0   | 55.2  | J   | COG0093                                 | Ribosomal protein L14                                                                                                                                                                                                       |
| TS28Bac1326 CDS CDS   | 20.1 | 1.7   | 54.7  | J   | COG0173                                 | Aspartyl-tRNA synthetase                                                                                                                                                                                                    |
| Buni2310 CDS CDS      | 4.0  | 0.3   | 54.5  | J   | COG0180                                 | Tryptophanyl-tRNA synthetase                                                                                                                                                                                                |
| TS28Fae22829 CDS CDS  | 11.5 | 1.0   | 52.2  | J   | COG0097                                 | Ribosomal protein L6P/L9E                                                                                                                                                                                                   |
| BWH20064 CDS CDS      | 3.8  | 0.3   | 52.0  | J   | COG0094                                 | Ribosomal protein L5                                                                                                                                                                                                        |
| BactD20035 CDS CDS    | 22.4 | 2.0   | 50.9  | J   | COG0050                                 | GTPases - translation elongation factors                                                                                                                                                                                    |
| TS29Rum11355 CDS CDS  | 11.2 | 1.0   | 50.7  | J   | COG0089                                 | Ribosomal protein L23                                                                                                                                                                                                       |
| TS28CloUnc059 CDS CDS | 16.6 | 1.5   | 50.4  | J   | COG0050                                 | GTPases - translation elongation factors                                                                                                                                                                                    |
| Buni2320 CDS CDS      | 11.0 | 1.0   | 49.9  | J   | COG0017                                 | Aspartyl/asparaginyl-tRNA synthetases                                                                                                                                                                                       |
| TS28Met1811 CDS CDS   | 2.2  | 0.2   | 49.9  | J   | COG0080                                 | Ribosomal protein L11                                                                                                                                                                                                       |
| Msmi751412 CDS CDS    | 2.2  | 0.2   | 49.9  | J   | COG0080                                 | Ribosomal protein L11                                                                                                                                                                                                       |

|                      |      |      |      |   |                 |                                                                                                                                                                                       |
|----------------------|------|------|------|---|-----------------|---------------------------------------------------------------------------------------------------------------------------------------------------------------------------------------|
| Caer1178 CDS CDS     | 5.5  | 0.5  | 49.9 | J | COG0359         | Ribosomal protein L9                                                                                                                                                                  |
| Msmi740268 CDS CDS   | 2.2  | 0.2  | 49.9 | J | COG0080         | Ribosomal protein L11                                                                                                                                                                 |
| Cbol5431 CDS CDS     | 11.0 | 1.0  | 49.9 | J | COG0256         | Ribosomal protein L18                                                                                                                                                                 |
| TS28Clo04653 CDS CDS | 3.5  | 0.3  | 47.7 | J | COG1236 COG1782 | Predicted exonuclease of the beta-lactamase fold involved in RNA processing Predicted metal-dependent RNase, consists of a metallo-beta-lactamase domain and an RNA-binding KH domain |
| TS28Rum01328 CDS CDS | 20.9 | 2.0  | 47.5 | J | COG0050         | GTPases - translation elongation factors                                                                                                                                              |
| TS28Rum11479 CDS CDS | 56.7 | 5.5  | 46.8 | J | COG0097         | Ribosomal protein L6P/L9E                                                                                                                                                             |
| TS29Rum16476 CDS CDS | 20.5 | 2.0  | 46.5 | J | COG0261         | Ribosomal protein L21                                                                                                                                                                 |
| Bova0745 CDS CDS     | 11.2 | 1.1  | 46.4 | J | COG0092         | Ribosomal protein S3                                                                                                                                                                  |
| Aput1412 CDS CDS     | 10.0 | 1.0  | 45.4 | J | COG0012         | Predicted GTPase, probable translation factor                                                                                                                                         |
| Aput0550 CDS CDS     | 10.0 | 1.0  | 45.4 | J | COG0024         | Methionine aminopeptidase                                                                                                                                                             |
| TS29Bac09449 CDS CDS | 15.9 | 1.7  | 43.3 | J | COG0198         | Ribosomal protein L24                                                                                                                                                                 |
| BactD14460 CDS CDS   | 15.9 | 1.7  | 43.3 | J | COG0198         | Ribosomal protein L24                                                                                                                                                                 |
| Bxyl1674 CDS CDS     | 15.9 | 1.7  | 43.3 | J | COG0198         | Ribosomal protein L24                                                                                                                                                                 |
| TS29Rum19788 CDS CDS | 9.5  | 1.0  | 43.1 | J | COG0099         | Ribosomal protein S13                                                                                                                                                                 |
| Ceut0026 CDS CDS     | 9.5  | 1.0  | 43.1 | J | COG0050         | GTPases - translation elongation factors                                                                                                                                              |
| TS28Rum01329 CDS CDS | 9.2  | 1.0  | 41.9 | J | COG0480         | Translation elongation factors (GTPases)                                                                                                                                              |
| Dlon0186 CDS CDS     | 13.8 | 1.5  | 41.6 | J | COG0094         | Ribosomal protein L5                                                                                                                                                                  |
| Buni0751 CDS CDS     | 4.5  | 0.5  | 40.9 | J | COG0215         | CysteinyI-tRNA synthetase                                                                                                                                                             |
| TS28Fae18265 CDS CDS | 22.5 | 2.5  | 40.9 | J | COG0361         | Translation initiation factor 1 (IF-1)                                                                                                                                                |
| Rtor0509 CDS CDS     | 4.5  | 0.5  | 40.9 | J | COG0098         | Ribosomal protein S5                                                                                                                                                                  |
| Bcac2073 CDS CDS     | 9.0  | 1.0  | 40.7 | J | COG0256         | Ribosomal protein L18                                                                                                                                                                 |
| TS28Rum08441 CDS CDS | 17.3 | 2.0  | 39.2 | J | COG0211         | Ribosomal protein L27                                                                                                                                                                 |
| Bthe7330426 CDS CDS  | 12.6 | 1.5  | 38.0 | J | COG0333         | Ribosomal protein L32                                                                                                                                                                 |
| Rumhvd0596 CDS CDS   | 8.3  | 1.0  | 37.5 | J | COG0087         | Ribosomal protein L3                                                                                                                                                                  |
| BactD14459 CDS CDS   | 4.1  | 0.5  | 36.8 | J | COG0186         | Ribosomal protein S17                                                                                                                                                                 |
| Bfin3716 CDS CDS     | 8.1  | 1.0  | 36.7 | J | COG0097         | Ribosomal protein L6P/L9E                                                                                                                                                             |
| Casp2730 CDS CDS     | 4.0  | 0.5  | 36.3 | J | COG0335         | Ribosomal protein L19                                                                                                                                                                 |
| TS28Fae22841 CDS CDS | 4.0  | 0.5  | 36.3 | J | COG0185         | Ribosomal protein S19                                                                                                                                                                 |
| Bcan2269 CDS CDS     | 12.0 | 1.5  | 36.3 | J | COG0097         | Ribosomal protein L6P/L9E                                                                                                                                                             |
| Bfin3712 CDS CDS     | 7.9  | 1.0  | 36.0 | J | COG0198         | Ribosomal protein L24                                                                                                                                                                 |
| Dfor1281 CDS CDS     | 7.8  | 1.0  | 35.6 | J | COG0256         | Ribosomal protein L18                                                                                                                                                                 |
| BactD14440 CDS CDS   | 7.8  | 1.0  | 35.5 | J | COG0080         | Ribosomal protein L11                                                                                                                                                                 |
| Bxyl1696 CDS CDS     | 7.8  | 1.0  | 35.5 | J | COG0080         | Ribosomal protein L11                                                                                                                                                                 |
| Buni2324 CDS CDS     | 11.6 | 1.5  | 35.2 | J | COG0264         | Translation elongation factor Ts                                                                                                                                                      |
| Cbol4974 CDS CDS     | 7.7  | 1.0  | 34.8 | J | COG0290         | Translation initiation factor 3 (IF-3)                                                                                                                                                |
| TS29Rum13747 CDS CDS | 15.3 | 2.0  | 34.6 | J | COG0051         | Ribosomal protein S10                                                                                                                                                                 |
| TS29Rum14233 CDS CDS | 53.1 | 7.0  | 34.4 | J | COG0049         | Ribosomal protein S7                                                                                                                                                                  |
| Buni1601 CDS CDS     | 7.5  | 1.0  | 34.0 | J | COG0290         | Translation initiation factor 3 (IF-3)                                                                                                                                                |
| TS29Par888 CDS CDS   | 15.0 | 2.0  | 34.0 | J | COG0333         | Ribosomal protein L32                                                                                                                                                                 |
| TS29Rum13734 CDS CDS | 37.0 | 5.0  | 33.6 | J | COG0199         | Ribosomal protein S14                                                                                                                                                                 |
| Csvm4102 CDS CDS     | 22.0 | 3.0  | 33.3 | J | COG0050         | GTPases - translation elongation factors                                                                                                                                              |
| BactD12041 CDS CDS   | 5.8  | 0.8  | 33.3 | J | COG0480         | Translation elongation factors (GTPases)                                                                                                                                              |
| TS28Fae20653 CDS CDS | 14.7 | 2.0  | 33.3 | J | COG0480         | Translation elongation factors (GTPases)                                                                                                                                              |
| Msmi740267 CDS CDS   | 6.2  | 0.9  | 32.7 | J | COG0081         | Ribosomal protein L1                                                                                                                                                                  |
| Dlon0201 CDS CDS     | 7.2  | 1.0  | 32.5 | J | COG0522         | Ribosomal protein S4 and related proteins                                                                                                                                             |
| TS28Fae10960 CDS CDS | 9.5  | 1.3  | 32.3 | J | COG0238         | Ribosomal protein S18                                                                                                                                                                 |
| TS28Bac108 CDS CDS   | 2.3  | 0.3  | 31.8 | J | COG0008         | Glutamyl- and glutaminyI-tRNA synthetases                                                                                                                                             |
| Ccom0484 CDS CDS     | 7.0  | 1.0  | 31.8 | J | COG0203         | Ribosomal protein L17                                                                                                                                                                 |
| TS28Fae05863 CDS CDS | 7.0  | 1.0  | 31.8 | J | COG0480         | Translation elongation factors (GTPases)                                                                                                                                              |
| TS28Fae13722 CDS CDS | 3.5  | 0.5  | 31.8 | J | COG0097         | Ribosomal protein L6P/L9E                                                                                                                                                             |
| Cste1008 CDS CDS     | 7.0  | 1.0  | 31.8 | J | COG0017         | Aspartyl/asparaginyI-tRNA synthetases                                                                                                                                                 |
| TS29Rum06183 CDS CDS | 7.0  | 1.0  | 31.8 | J | COG2868         | Predicted ribosomal protein                                                                                                                                                           |
| TS28Met0975 CDS CDS  | 3.5  | 0.5  | 31.8 | J | COG0185         | Ribosomal protein S19                                                                                                                                                                 |
| Cmet0169 CDS CDS     | 7.0  | 1.0  | 31.8 | J | COG0480         | Translation elongation factors (GTPases)                                                                                                                                              |
| Bcan2264 CDS CDS     | 7.0  | 1.0  | 31.8 | J | COG0093         | Ribosomal protein L14                                                                                                                                                                 |
| Msmi741036 CDS CDS   | 3.5  | 0.5  | 31.8 | J | COG0185         | Ribosomal protein S19                                                                                                                                                                 |
| Msmi750644 CDS CDS   | 3.5  | 0.5  | 31.8 | J | COG0185         | Ribosomal protein S19                                                                                                                                                                 |
| Bcan3099 CDS CDS     | 7.0  | 1.0  | 31.8 | J | COG0267         | Ribosomal protein L33                                                                                                                                                                 |
| Bxyl1680 CDS CDS     | 14.0 | 2.0  | 31.8 | J | COG0091         | Ribosomal protein L22                                                                                                                                                                 |
| BactD14455 CDS CDS   | 14.0 | 2.0  | 31.8 | J | COG0091         | Ribosomal protein L22                                                                                                                                                                 |
| BactD14463 CDS CDS   | 27.9 | 4.0  | 31.6 | J | COG0097         | Ribosomal protein L6P/L9E                                                                                                                                                             |
| TS28Clo00190 CDS CDS | 13.7 | 2.0  | 31.1 | J | COG0052         | Ribosomal protein S2                                                                                                                                                                  |
| Bste2294 CDS CDS     | 13.6 | 2.0  | 30.9 | J | COG0091         | Ribosomal protein L22                                                                                                                                                                 |
| TS29Rum21002 CDS CDS | 27.0 | 4.0  | 30.6 | J | COG0198         | Ribosomal protein L24                                                                                                                                                                 |
| Buni0631 CDS CDS     | 7.8  | 1.2  | 30.5 | J | COG0008         | Glutamyl- and glutaminyI-tRNA synthetases                                                                                                                                             |
| CspM6212581 CDS CDS  | 13.3 | 2.0  | 30.1 | J | COG0050         | GTPases - translation elongation factors                                                                                                                                              |
| Robe1730 CDS CDS     | 13.3 | 2.0  | 30.1 | J | COG0088         | Ribosomal protein L4                                                                                                                                                                  |
| TS28Fae22844 CDS CDS | 16.5 | 2.5  | 30.0 | J | COG0088         | Ribosomal protein L4                                                                                                                                                                  |
| Ehal0625 CDS CDS     | 16.3 | 2.5  | 29.6 | J | COG0050         | GTPases - translation elongation factors                                                                                                                                              |
| TS28Eub5491 CDS CDS  | 16.3 | 2.5  | 29.6 | J | COG0050         | GTPases - translation elongation factors                                                                                                                                              |
| TS28Fae07804 CDS CDS | 6.5  | 1.0  | 29.5 | J | COG0359         | Ribosomal protein L9                                                                                                                                                                  |
| TS28Fae01963 CDS CDS | 12.8 | 2.0  | 29.1 | J | COG0048         | Ribosomal protein S12                                                                                                                                                                 |
| Rtor0507 CDS CDS     | 3.2  | 0.5  | 28.8 | J | COG0200         | Ribosomal protein L15                                                                                                                                                                 |
| TS29Bac03521 CDS CDS | 6.3  | 1.0  | 28.8 | J | COG0130         | Pseudouridine synthase                                                                                                                                                                |
| Bxyl2755 CDS CDS     | 6.3  | 1.0  | 28.7 | J | COG0103         | Ribosomal protein S9                                                                                                                                                                  |
| Bxyl1679 CDS CDS     | 11.1 | 1.8  | 28.5 | J | COG0092         | Ribosomal protein S3                                                                                                                                                                  |
| TS28Rum13634 CDS CDS | 18.8 | 3.0  | 28.5 | J | COG0233         | Ribosome recycling factor                                                                                                                                                             |
| Buni1580 CDS CDS     | 35.1 | 5.7  | 28.1 | J | COG0173         | Aspartyl-tRNA synthetase                                                                                                                                                              |
| Csvm4103 CDS CDS     | 12.1 | 2.0  | 27.5 | J | COG0480         | Translation elongation factors (GTPases)                                                                                                                                              |
| TS29Bac11453 CDS CDS | 87.2 | 14.5 | 27.3 | J | COG0050         | GTPases - translation elongation factors                                                                                                                                              |
| Robe1841 CDS CDS     | 2.0  | 0.3  | 27.2 | J | COG0184         | Ribosomal protein S15P/S13E                                                                                                                                                           |
| TS29Rum10660 CDS CDS | 2.0  | 0.3  | 27.2 | J | COG0184         | Ribosomal protein S15P/S13E                                                                                                                                                           |
| Bxyl2065 CDS CDS     | 2.0  | 0.3  | 27.2 | J | COG0495         | Leucyl-tRNA synthetase                                                                                                                                                                |
| TS28Met0812 CDS CDS  | 1.5  | 0.3  | 27.2 | J | COG0103         | Ribosomal protein S9                                                                                                                                                                  |
| TS28Rum12100 CDS CDS | 3.0  | 0.5  | 27.2 | J | COG0042         | tRNA-dihydrouridine synthase                                                                                                                                                          |
| TS29Bac06690 CDS CDS | 3.0  | 0.5  | 27.2 | J | COG0100         | Ribosomal protein S11                                                                                                                                                                 |
| TS28Col1452 CDS CDS  | 12.0 | 2.0  | 27.2 | J | COG0092         | Ribosomal protein S3                                                                                                                                                                  |
| TS28Fae21266 CDS CDS | 3.0  | 0.5  | 27.2 | J | COG0050         | GTPases - translation elongation factors                                                                                                                                              |
| Dlon0347 CDS CDS     | 6.0  | 1.0  | 27.2 | J | COG0184         | Ribosomal protein S15P/S13E                                                                                                                                                           |
| TS28Fae18624 CDS CDS | 3.0  | 0.5  | 27.2 | J | COG0244         | Ribosomal protein L10                                                                                                                                                                 |
| Msmi750605 CDS CDS   | 1.5  | 0.3  | 27.2 | J | COG0103         | Ribosomal protein S9                                                                                                                                                                  |
| Rlac1587 CDS CDS     | 6.0  | 1.0  | 27.2 | J | COG0228         | Ribosomal protein S16                                                                                                                                                                 |
| TS28Rum15986 CDS CDS | 6.0  | 1.0  | 27.2 | J | COG1825         | Ribosomal protein L25 (general stress protein Ctc)                                                                                                                                    |
| Msmi741073 CDS CDS   | 1.5  | 0.3  | 27.2 | J | COG0103         | Ribosomal protein S9                                                                                                                                                                  |

|                        |      |      |      |   |                 |                                                                                 |
|------------------------|------|------|------|---|-----------------|---------------------------------------------------------------------------------|
| TS28Fae03931 CDS CDS   | 18.0 | 3.0  | 27.2 | J | COG0144 COG3270 | tRNA and rRNA cytosine-C5-methylases Uncharacterized conserved protein          |
| Bova0792 CDS CDS       | 4.5  | 0.8  | 27.0 | J | COG0264         | Translation elongation factor Ts                                                |
| Begg2627 CDS CDS       | 4.0  | 0.7  | 26.9 | J | COG0090         | Ribosomal protein L2                                                            |
| Bste2310 CDS CDS       | 11.5 | 2.0  | 26.2 | J | COG0080         | Ribosomal protein L11                                                           |
| Brvfor3830 CDS CDS     | 17.2 | 3.0  | 26.0 | J | COG0480         | Translation elongation factors (GTPases)                                        |
| Csvm4104 CDS CDS       | 5.7  | 1.0  | 25.9 | J | COG0049         | Ribosomal protein S7                                                            |
| TS28A1i1618 CDS CDS    | 5.7  | 1.0  | 25.9 | J | COG0441         | Threonyl-tRNA synthetase                                                        |
| TS28Rum13882 CDS CDS   | 8.5  | 1.5  | 25.7 | J | COG0102         | Ribosomal protein L13                                                           |
| TS29Fae06981 CDS CDS   | 2.8  | 0.5  | 25.7 | J | COG0264         | Translation elongation factor Ts                                                |
| TS28Rum15336 CDS CDS   | 11.3 | 2.0  | 25.7 | J | COG0254         | Ribosomal protein L31                                                           |
| TS28Fae20654 CDS CDS   | 33.7 | 6.0  | 25.5 | J | COG0050         | GTPases - translation elongation factors                                        |
| Bfin3713 CDS CDS       | 3.7  | 0.7  | 25.2 | J | COG0094         | Ribosomal protein L5                                                            |
| Caer1979 CDS CDS       | 5.5  | 1.0  | 25.0 | J | COG0197         | Ribosomal protein L16/L10E                                                      |
| Aput0546 CDS CDS       | 11.0 | 2.0  | 25.0 | J | COG0090         | Ribosomal protein L2                                                            |
| Dlon189 CDS CDS        | 5.5  | 1.0  | 25.0 | J | COG0097         | Ribosomal protein L6P/L9E                                                       |
| Casp6320 CDS CDS       | 5.5  | 1.0  | 25.0 | J | COG0267         | Ribosomal protein L33                                                           |
| TS29Rum08033 CDS CDS   | 11.0 | 2.0  | 25.0 | J | COG1825         | Ribosomal protein L25 (general stress protein Ctc)                              |
| Bxyl1699 CDS CDS       | 36.4 | 6.7  | 24.8 | J | COG0050         | GTPases - translation elongation factors                                        |
| Brvfor3831 CDS CDS     | 16.2 | 3.0  | 24.5 | J | COG0050         | GTPases - translation elongation factors                                        |
| Bxyl0455 CDS CDS       | 1.8  | 0.3  | 24.3 | J | COG0173         | Aspartyl-tRNA synthetase                                                        |
| TS28Bac1897 CDS CDS    | 5.3  | 1.0  | 24.2 | J | COG0143         | Methionyl-tRNA synthetase                                                       |
| Rena2525 CDS CDS       | 5.3  | 1.0  | 24.2 | J | COG0094         | Ribosomal protein L5                                                            |
| Dlon1162 CDS CDS       | 5.3  | 1.0  | 24.2 | J | COG0222         | Ribosomal protein L7/L12                                                        |
| Robe1468 CDS CDS       | 15.9 | 3.0  | 24.0 | J | COG0828         | Ribosomal protein S21                                                           |
| TS28Rum11482 CDS CDS   | 37.0 | 7.0  | 24.0 | J | COG0198         | Ribosomal protein L24                                                           |
| FpraM2122622 CDS CDS   | 10.5 | 2.0  | 23.8 | J | COG0566         | rRNA methylases                                                                 |
| Chol5446 CDS CDS       | 10.5 | 2.0  | 23.8 | J | COG0087         | Ribosomal protein L3                                                            |
| TS29Bae09457 CDS CDS   | 21.0 | 4.0  | 23.8 | J | COG0185         | Ribosomal protein S19                                                           |
| Casp5594 CDS CDS       | 10.3 | 2.0  | 23.5 | J | COG0211         | Ribosomal protein L27                                                           |
| Dfor1292 CDS CDS       | 10.3 | 2.0  | 23.3 | J | COG0091         | Ribosomal protein L22                                                           |
| Bxyl1664 CDS CDS       | 10.2 | 2.0  | 23.2 | J | COG0024         | Methionine aminopeptidase                                                       |
| TS29Rum16474 CDS CDS   | 28.0 | 5.5  | 23.1 | J | COG0211         | Ribosomal protein L27                                                           |
| Chol5409 CDS CDS       | 10.0 | 2.0  | 22.7 | J | COG0102         | Ribosomal protein L13                                                           |
| Dlon181 CDS CDS        | 5.0  | 1.0  | 22.7 | J | COG0197         | Ribosomal protein L16/L10E                                                      |
| TS28Eub5772 CDS CDS    | 2.5  | 0.5  | 22.7 | J | COG1841         | Ribosomal protein L30/L7E                                                       |
| TS28Dor1580 CDS CDS    | 2.5  | 0.5  | 22.7 | J | COG0200         | Ribosomal protein L15                                                           |
| Ehal1406 CDS CDS       | 2.5  | 0.5  | 22.7 | J | COG1841         | Ribosomal protein L30/L7E                                                       |
| TS28Col1442 CDS CDS    | 5.0  | 1.0  | 22.7 | J | COG0256         | Ribosomal protein L18                                                           |
| TS29Rum13321 CDS CDS   | 5.0  | 1.0  | 22.7 | J | COG0292         | Ribosomal protein L20                                                           |
| Dlon10193 CDS CDS      | 2.5  | 0.5  | 22.7 | J | COG0200         | Ribosomal protein L15                                                           |
| Rena1846 CDS CDS       | 2.5  | 0.5  | 22.7 | J | COG0211         | Ribosomal protein L27                                                           |
| TS28Eub8305 CDS CDS    | 5.0  | 1.0  | 22.7 | J | COG0197         | Ribosomal protein L16/L10E                                                      |
| TS28Clo02719 CDS CDS   | 10.0 | 2.0  | 22.7 | J | COG0088         | Ribosomal protein L4                                                            |
| TS28Rum16023 CDS CDS   | 43.5 | 8.7  | 22.7 | J | COG0102         | Ribosomal protein L13                                                           |
| Acae3102 CDS CDS       | 5.0  | 1.0  | 22.7 | J | COG0094         | Ribosomal protein L5                                                            |
| Acol1127 CDS CDS       | 5.0  | 1.0  | 22.7 | J | COG0480         | Translation elongation factors (GTPases)                                        |
| Caer1218 CDS CDS       | 2.5  | 0.5  | 22.7 | J | COG0098         | Ribosomal protein S5                                                            |
| Rumhyd2193 CDS CDS     | 5.0  | 1.0  | 22.7 | J | COG2890 COG3872 | Methylase of polypeptide chain release factors Predicted metal-dependent enzyme |
| TS29Dor1582 CDS CDS    | 2.5  | 0.5  | 22.7 | J | COG0211         | Ribosomal protein L27                                                           |
| TS28Fae01161 CDS CDS   | 2.5  | 0.5  | 22.7 | J | COG0291         | Ribosomal protein L35                                                           |
| Chol2237 CDS CDS       | 29.9 | 6.0  | 22.6 | J | COG0050         | GTPases - translation elongation factors                                        |
| BactD14441 CDS CDS     | 19.7 | 4.0  | 22.4 | J | COG0081         | Ribosomal protein L1                                                            |
| Bxyl1695 CDS CDS       | 19.7 | 4.0  | 22.4 | J | COG0081         | Ribosomal protein L1                                                            |
| TS28Rum15875 CDS CDS   | 29.4 | 6.0  | 22.3 | J | COG0087         | Ribosomal protein L3                                                            |
| TS29Rum13735 CDS CDS   | 12.2 | 2.5  | 22.1 | J | COG0094         | Ribosomal protein L5                                                            |
| TS29Rum13738 CDS CDS   | 24.1 | 5.0  | 21.9 | J | COG0255         | Ribosomal protein L29                                                           |
| TS29Bae07881 CDS CDS   | 3.2  | 0.7  | 21.8 | J | COG0539         | Ribosomal protein S1                                                            |
| BactD14469 CDS CDS     | 11.7 | 2.5  | 21.3 | J | COG0024         | Methionine aminopeptidase                                                       |
| Csci0801 CDS CDS       | 4.7  | 1.0  | 21.2 | J | COG0049         | Ribosomal protein S7                                                            |
| TS28Eub8310 CDS CDS    | 2.3  | 0.5  | 21.2 | J | COG0097         | Ribosomal protein L6P/L9E                                                       |
| TS28Fae10286 CDS CDS   | 9.3  | 2.0  | 21.2 | J | COG0233         | Ribosome recycling factor                                                       |
| Rena1209 CDS CDS       | 2.3  | 0.5  | 21.2 | J | COG0360         | Ribosomal protein S6                                                            |
| RintL13584 CDS CDS     | 9.3  | 2.0  | 21.0 | J | COG0081         | Ribosomal protein L1                                                            |
| TS28Rum15874 CDS CDS   | 32.3 | 7.0  | 20.9 | J | COG0088         | Ribosomal protein L4                                                            |
| Aput0543 CDS CDS       | 32.0 | 7.0  | 20.8 | J | COG0480         | Translation elongation factors (GTPases)                                        |
| Bhan0425 CDS CDS       | 4.5  | 1.0  | 20.4 | J | COG0094         | Ribosomal protein L5                                                            |
| TS28Eub4402 CDS CDS    | 4.5  | 1.0  | 20.4 | J | COG0228         | Ribosomal protein S16                                                           |
| Aput1877 CDS CDS       | 9.0  | 2.0  | 20.4 | J | COG2264         | Ribosomal protein L11 methylase                                                 |
| TS29Col1653 CDS CDS    | 9.0  | 2.0  | 20.4 | J | COG0097         | Ribosomal protein L6P/L9E                                                       |
| Rtor0519 CDS CDS       | 4.5  | 1.0  | 20.4 | J | COG0197         | Ribosomal protein L16/L10E                                                      |
| Dfor0348 CDS CDS       | 9.0  | 2.0  | 20.4 | J | COG0360         | Ribosomal protein S6                                                            |
| Cste0999 CDS CDS       | 9.0  | 2.0  | 20.4 | J | COG0081         | Ribosomal protein L1                                                            |
| TS28Rum00103 CDS CDS   | 9.0  | 2.0  | 20.4 | J | COG0099         | Ribosomal protein S13                                                           |
| Aput0547 CDS CDS       | 9.0  | 2.0  | 20.4 | J | COG0186         | Ribosomal protein S17                                                           |
| Bfin3715 CDS CDS       | 4.5  | 1.0  | 20.2 | J | COG0096         | Ribosomal protein S8                                                            |
| Bum0614 CDS CDS        | 57.9 | 13.0 | 20.2 | J | COG0092         | Ribosomal protein S3                                                            |
| TS28Rum11472 CDS CDS   | 15.5 | 3.5  | 20.1 | J | COG0024         | Methionine aminopeptidase                                                       |
| TS28Dor0002 CDS CDS    | 8.8  | 2.0  | 19.9 | J | COG0091         | Ribosomal protein L22                                                           |
| TS28Eub7689 CDS CDS    | 56.1 | 13.0 | 19.6 | J | COG0049         | Ribosomal protein S7                                                            |
| Dfor1048 CDS CDS       | 17.2 | 4.0  | 19.6 | J | COG0050         | GTPases - translation elongation factors                                        |
| TS28Rum00003 CDS CDS   | 6.5  | 1.5  | 19.5 | J | COG0256         | Ribosomal protein L18                                                           |
| Robe1745 CDS CDS       | 6.5  | 1.5  | 19.5 | J | COG0256         | Ribosomal protein L18                                                           |
| Bova0748 CDS CDS       | 4.3  | 1.0  | 19.4 | J | COG0088         | Ribosomal protein L4                                                            |
| Msmi740266 CDS CDS     | 5.0  | 1.2  | 19.4 | J | COG0244         | Ribosomal protein L10                                                           |
| Msmi751414 CDS CDS     | 5.0  | 1.2  | 19.4 | J | COG0244         | Ribosomal protein L10                                                           |
| BactD13208 CDS CDS     | 4.3  | 1.0  | 19.3 | J | COG0441         | Threonyl-tRNA synthetase                                                        |
| TS29Bif3778 CDS CDS    | 1.1  | 0.3  | 19.2 | J | COG0185         | Ribosomal protein S19                                                           |
| TS28Bif0836 CDS CDS    | 1.1  | 0.3  | 19.2 | J | COG0185         | Ribosomal protein S19                                                           |
| BactD13209 CDS CDS     | 6.7  | 1.6  | 19.1 | J | COG0290         | Translation initiation factor 3 (IF-3)                                          |
| Bova1291 CDS CDS       | 6.7  | 1.6  | 19.1 | J | COG0290         | Translation initiation factor 3 (IF-3)                                          |
| BactD11537 CDS CDS     | 2.8  | 0.7  | 19.1 | J | COG0017         | Aspartyl/asparaginyl-tRNA synthetases                                           |
| TS29Met0847 CDS CDS    | 4.2  | 1.0  | 19.1 | J | COG0097         | Ribosomal protein L6P/L9E                                                       |
| Bova1401 CDS CDS       | 10.4 | 2.5  | 19.0 | J | COG0532         | Translation initiation factor 2 (IF-2; GTPase)                                  |
| TS29RumUnc1196 CDS CDS | 25.0 | 6.0  | 18.9 | J | COG0290         | Translation initiation factor 3 (IF-3)                                          |
| TS29Rum13737 CDS CDS   | 75.0 | 18.0 | 18.9 | J | COG0186         | Ribosomal protein S17                                                           |

|                        |      |      |      |   |                 |                                                                     |
|------------------------|------|------|------|---|-----------------|---------------------------------------------------------------------|
| TS29RumUnc1162/CDS/CDS | 29.0 | 7.0  | 18.8 | J | COG3743/COG0261 | Uncharacterized conserved protein/Ribosomal protein L21             |
| Bxyl1675/CDS/CDS       | 4.1  | 1.0  | 18.7 | J | COG0093         | Ribosomal protein L14                                               |
| Beac3587/CDS/CDS       | 1.4  | 0.3  | 18.6 | J | COG0211         | Ribosomal protein L27                                               |
| TS28Fae22588/CDS/CDS   | 40.7 | 10.0 | 18.5 | J | COG0255         | Ribosomal protein L29                                               |
| Bova0742/CDS/CDS       | 4.0  | 1.0  | 18.3 | J | COG0024         | Methionine aminopeptidase                                           |
| Svar0549/CDS/CDS       | 12.0 | 3.0  | 18.2 | J | COG0480         | Translation elongation factors (GTPases)                            |
| TS28Rum00104/CDS/CDS   | 4.0  | 1.0  | 18.2 | J | COG0100         | Ribosomal protein S11                                               |
| Svar0403/CDS/CDS       | 4.0  | 1.0  | 18.2 | J | COG0080         | Ribosomal protein L11                                               |
| TS28Dor1478/CDS/CDS    | 4.0  | 1.0  | 18.2 | J | COG0267         | Ribosomal protein L33                                               |
| Csci1697/CDS/CDS       | 2.0  | 0.5  | 18.2 | J | COG0254         | Ribosomal protein L31                                               |
| Dlon0182/CDS/CDS       | 4.0  | 1.0  | 18.2 | J | COG0255         | Ribosomal protein L29                                               |
| Cste0078/CDS/CDS       | 4.0  | 1.0  | 18.2 | J | COG0480         | Translation elongation factors (GTPases)                            |
| TS28Col1430/CDS/CDS    | 8.0  | 2.0  | 18.2 | J | COG0100         | Ribosomal protein S11                                               |
| Cbol5441/CDS/CDS       | 4.0  | 1.0  | 18.2 | J | COG0091         | Ribosomal protein L22                                               |
| Casp0940/CDS/CDS       | 4.0  | 1.0  | 18.2 | J | COG0257         | Ribosomal protein L36                                               |
| TS28Rum10760/CDS/CDS   | 4.0  | 1.0  | 18.2 | J | COG0480         | Translation elongation factors (GTPases)                            |
| TS28Fae13718/CDS/CDS   | 12.0 | 3.0  | 18.2 | J | COG0200         | Ribosomal protein L15                                               |
| Msmi750611/CDS/CDS     | 1.0  | 0.3  | 18.2 | J | COG0099         | Ribosomal protein S13                                               |
| TS29Col0504/CDS/CDS    | 2.0  | 0.5  | 18.2 | J | COG0199         | Ribosomal protein S14                                               |
| TS28Rum14857/CDS/CDS   | 4.0  | 1.0  | 18.2 | J | COG1189         | Predicted rRNA methylase                                            |
| Rena2513/CDS/CDS       | 4.0  | 1.0  | 18.2 | J | COG0257         | Ribosomal protein L36                                               |
| Beac2368/CDS/CDS       | 4.0  | 1.0  | 18.1 | J | COG0227         | Ribosomal protein L28                                               |
| Bxyl1682/CDS/CDS       | 13.8 | 3.5  | 17.8 | J | COG0090         | Ribosomal protein L2                                                |
| TS28Rum08848/CDS/CDS   | 11.8 | 3.0  | 17.8 | J | COG0090         | Ribosomal protein L2                                                |
| Rena2535/CDS/CDS       | 7.8  | 2.0  | 17.8 | J | COG0089         | Ribosomal protein L23                                               |
| Robe3802/CDS/CDS       | 15.5 | 4.0  | 17.6 | J | COG0099         | Ribosomal protein S13                                               |
| Bste2280/CDS/CDS       | 3.9  | 1.0  | 17.6 | J | COG0200         | Ribosomal protein L15                                               |
| Bfin1190/CDS/CDS       | 6.4  | 1.7  | 17.4 | J | COG0539         | Ribosomal protein S1                                                |
| TS29Bac02139/CDS/CDS   | 1.9  | 0.5  | 17.3 | J | COG0539         | Ribosomal protein S1                                                |
| Rumhvd1580/CDS/CDS     | 19.0 | 5.0  | 17.2 | J | COG0050         | GTPases - translation elongation factors                            |
| Rena1515/CDS/CDS       | 34.1 | 9.0  | 17.2 | J | COG0050         | GTPases - translation elongation factors                            |
| Bint1670/CDS/CDS       | 3.8  | 1.0  | 17.2 | J | COG0222         | Ribosomal protein L7/L12                                            |
| TS29Rum17167/CDS/CDS   | 45.3 | 12.0 | 17.1 | J | COG0360         | Ribosomal protein S6                                                |
| Bxyl0972/CDS/CDS       | 9.5  | 2.5  | 17.0 | J | COG0480         | Translation elongation factors (GTPases)                            |
| Cste0994/CDS/CDS       | 7.5  | 2.0  | 16.9 | J | COG0050         | GTPases - translation elongation factors                            |
| Bumi0608/CDS/CDS       | 13.0 | 3.5  | 16.9 | J | COG0024         | Methionine aminopeptidase                                           |
| BactD24191/CDS/CDS     | 3.7  | 1.0  | 16.7 | J | COG0539         | Ribosomal protein S1                                                |
| Cbol5942/CDS/CDS       | 11.0 | 3.0  | 16.6 | J | COG1544         | Ribosome-associated protein Y (PSrp-I)                              |
| Dfor1297/CDS/CDS       | 7.2  | 2.0  | 16.3 | J | COG0087         | Ribosomal protein L3                                                |
| TS29Col0314/CDS/CDS    | 18.0 | 5.0  | 16.3 | J | COG0009         | Putative translation factor (SUA5)                                  |
| TS29RumUnc0852/CDS/CDS | 75.5 | 21.0 | 16.3 | J | COG0050         | GTPases - translation elongation factors                            |
| Bxyl1661/CDS/CDS       | 3.6  | 1.0  | 16.3 | J | COG0100         | Ribosomal protein S11                                               |
| Chv12252/CDS/CDS       | 7.1  | 2.0  | 16.2 | J | COG0480         | Translation elongation factors (GTPases)                            |
| TS29Rum15322/CDS/CDS   | 17.8 | 5.0  | 16.1 | J | COG0211         | Ribosomal protein L27                                               |
| TS29Rum03453/CDS/CDS   | 14.0 | 4.0  | 15.9 | J | COG0828         | Ribosomal protein S21                                               |
| TS28Bac2659/CDS/CDS    | 2.3  | 0.7  | 15.9 | J | COG0525         | Valyl-tRNA synthetase                                               |
| TS28Bac4345/CDS/CDS    | 4.7  | 1.3  | 15.9 | J | COG0180         | Tryptophanyl-tRNA synthetase                                        |
| Rtor1265/CDS/CDS       | 3.5  | 1.0  | 15.9 | J | COG0184         | Ribosomal protein S15P/S13E                                         |
| Chir2104/CDS/CDS       | 3.5  | 1.0  | 15.9 | J | COG0050         | GTPases - translation elongation factors                            |
| Bean2268/CDS/CDS       | 3.5  | 1.0  | 15.9 | J | COG0096         | Ribosomal protein S8                                                |
| TS28Bac4689/CDS/CDS    | 2.3  | 0.7  | 15.9 | J | COG0008         | Glutamyl- and glutamyl-tRNA synthetases                             |
| Ccom0299/CDS/CDS       | 20.7 | 6.0  | 15.7 | J | COG0050         | GTPases - translation elongation factors                            |
| BactD20044/CDS/CDS     | 3.4  | 1.0  | 15.6 | J | COG0090         | Ribosomal protein L2                                                |
| Bova0747/CDS/CDS       | 3.4  | 1.0  | 15.6 | J | COG0090         | Ribosomal protein L2                                                |
| Acac2828/CDS/CDS       | 17.1 | 5.0  | 15.5 | J | COG0050         | GTPases - translation elongation factors                            |
| TS28Met0777/CDS/CDS    | 0.9  | 0.3  | 15.4 | J | COG1841         | Ribosomal protein L30/L7E                                           |
| Msmi741053/CDS/CDS     | 0.9  | 0.3  | 15.4 | J | COG1841         | Ribosomal protein L30/L7E                                           |
| TS28Rum08197/CDS/CDS   | 1.7  | 0.5  | 15.4 | J | COG0080         | Ribosomal protein L11                                               |
| Rtor0296/CDS/CDS       | 1.7  | 0.5  | 15.4 | J | COG0080         | Ribosomal protein L11                                               |
| Rtor0520/CDS/CDS       | 3.4  | 1.0  | 15.4 | J | COG0092         | Ribosomal protein S3                                                |
| TS28Met0759/CDS/CDS    | 2.3  | 0.7  | 15.3 | J | COG5257         | Translation initiation factor 2, gamma subunit (eIF-2gamma: GTPase) |
| BWH20067/CDS/CDS       | 1.7  | 0.5  | 15.3 | J | COG0186         | Ribosomal protein S17                                               |
| TS28AI0073/CDS/CDS     | 3.3  | 1.0  | 15.1 | J | COG0291         | Ribosomal protein L35                                               |
| Cbol5283/CDS/CDS       | 10.0 | 3.0  | 15.1 | J | COG2264         | Ribosomal protein L11 methylase                                     |
| Eeli1002/CDS/CDS       | 5.0  | 1.5  | 15.1 | J | COG0480         | Translation elongation factors (GTPases)                            |
| Rena0577/CDS/CDS       | 8.3  | 2.5  | 15.1 | J | COG0290         | Translation initiation factor 3 (IF-3)                              |
| BactD20780/CDS/CDS     | 3.3  | 1.0  | 15.1 | J | COG0343         | Queuine/archaeosine tRNA-ribosyltransferase                         |
| Dlon1158/CDS/CDS       | 3.3  | 1.0  | 15.1 | J | COG0081         | Ribosomal protein L1                                                |
| TS28Eub0671/CDS/CDS    | 1.7  | 0.5  | 15.1 | J | COG0103         | Ribosomal protein S9                                                |
| Ehal0508/CDS/CDS       | 1.7  | 0.5  | 15.1 | J | COG0103         | Ribosomal protein S9                                                |
| TS29Bac02529/CDS/CDS   | 6.6  | 2.0  | 15.0 | J | COG0238         | Ribosomal protein S18                                               |
| Bste2288/CDS/CDS       | 9.9  | 3.0  | 15.0 | J | COG0198         | Ribosomal protein L24                                               |
| Rlac2126/CDS/CDS       | 29.6 | 9.0  | 15.0 | J | COG0050         | GTPases - translation elongation factors                            |
| Bste2308/CDS/CDS       | 3.3  | 1.0  | 14.9 | J | COG0244         | Ribosomal protein L10                                               |
| TS29Fae04369/CDS/CDS   | 23.0 | 7.0  | 14.9 | J | COG0255         | Ribosomal protein L29                                               |
| TS28Rum00088/CDS/CDS   | 3.3  | 1.0  | 14.8 | J | COG0522         | Ribosomal protein S4 and related proteins                           |
| Dlon0191/CDS/CDS       | 3.3  | 1.0  | 14.8 | J | COG0098         | Ribosomal protein S5                                                |
| TS29Bac09460/CDS/CDS   | 19.5 | 6.0  | 14.7 | J | COG0088         | Ribosomal protein L4                                                |
| Bxyl1676/CDS/CDS       | 4.8  | 1.5  | 14.5 | J | COG0186         | Ribosomal protein S17                                               |
| Msmi740893/CDS/CDS     | 3.2  | 1.0  | 14.5 | J | COG5256         | Translation elongation factor EF-1alpha (GTPase)                    |
| Rtor0546/CDS/CDS       | 12.8 | 4.0  | 14.5 | J | COG0050         | GTPases - translation elongation factors                            |
| Robe1740/CDS/CDS       | 19.0 | 6.0  | 14.4 | J | COG0198         | Ribosomal protein L24                                               |
| Beap2652/CDS/CDS       | 12.6 | 4.0  | 14.3 | J | COG0050         | GTPases - translation elongation factors                            |
| TS29Col1420/CDS/CDS    | 11.0 | 3.5  | 14.3 | J | COG0267         | Ribosomal protein L33                                               |
| Bste2301/CDS/CDS       | 6.3  | 2.0  | 14.3 | J | COG0480         | Translation elongation factors (GTPases)                            |
| Bumi2043/CDS/CDS       | 12.5 | 4.0  | 14.2 | J | COG0172         | Seryl-tRNA synthetase                                               |
| TS29Dor1077/CDS/CDS    | 25.0 | 8.0  | 14.2 | J | COG0101         | Pseudouridylate synthase                                            |
| Begg2623/CDS/CDS       | 21.9 | 7.0  | 14.2 | J | COG0197         | Ribosomal protein L16/L10E                                          |
| BactD10526/CDS/CDS     | 9.3  | 3.0  | 14.1 | J | COG0343         | Queuine/archaeosine tRNA-ribosyltransferase                         |
| TS28Met1809/CDS/CDS    | 4.7  | 1.5  | 14.1 | J | COG0244         | Ribosomal protein L10                                               |
| TS28Col1460/CDS/CDS    | 12.3 | 4.0  | 14.0 | J | COG0051         | Ribosomal protein S10                                               |
| Robe3195/CDS/CDS       | 3.1  | 1.0  | 14.0 | J | COG0103         | Ribosomal protein S9                                                |
| BactD14443/CDS/CDS     | 5.6  | 1.8  | 14.0 | J | COG0222         | Ribosomal protein L7/L12                                            |
| Cnex0780/CDS/CDS       | 6.1  | 2.0  | 13.9 | J | COG0480         | Translation elongation factors (GTPases)                            |
| Robe3352/CDS/CDS       | 3.0  | 1.0  | 13.8 | J | COG0292         | Ribosomal protein L20                                               |
| Msmi740440/CDS/CDS     | 1.0  | 0.3  | 13.6 | J | COG0060         | Isoleucyl-tRNA synthetase                                           |



|                               |      |      |      |   |                 |                                                                                  |
|-------------------------------|------|------|------|---|-----------------|----------------------------------------------------------------------------------|
| TS28Eub3732 CDS CDS           | 1.5  | 0.5  | 13.6 | J | COG0186         | Ribosomal protein S17                                                            |
| CspM6210512 CDS CDS           | 3.0  | 1.0  | 13.6 | J | COG0222         | Ribosomal protein L7/L12                                                         |
| Chv12587 CDS CDS              | 3.0  | 1.0  | 13.6 | J | COG0009         | Putative translation factor (SUA5)                                               |
| Caer1213 CDS CDS              | 1.5  | 0.5  | 13.6 | J | COG0094         | Ribosomal protein L5                                                             |
| Cspi1174 CDS CDS              | 3.0  | 1.0  | 13.6 | J | COG0094         | Ribosomal protein L5                                                             |
| RintL11234 CDS CDS            | 3.0  | 1.0  | 13.6 | J | COG0233         | Ribosome recycling factor                                                        |
| Acac0404 CDS CDS              | 3.0  | 1.0  | 13.6 | J | COG0215         | Cysteinyl-tRNA synthetase                                                        |
| Acol3298 CDS CDS              | 3.0  | 1.0  | 13.6 | J | COG0621         | 2-methylthioadenine synthetase                                                   |
| TS28Col1459 CDS CDS           | 3.0  | 1.0  | 13.6 | J | COG0087         | Ribosomal protein L3                                                             |
| TS28Rum06712 CDS CDS          | 1.5  | 0.5  | 13.6 | J | COG0254         | Ribosomal protein L31                                                            |
| TS28Rum08934 CDS CDS          | 3.0  | 1.0  | 13.6 | J | COG0173         | Aspartyl-tRNA synthetase                                                         |
| TS28Rum15334 CDS CDS          | 3.0  | 1.0  | 13.6 | J | COG2890 COG3872 | Methylase of polypeptide chain release factors Predicted metal-dependent enzyme  |
| CspM6213073 CDS CDS           | 3.0  | 1.0  | 13.6 | J | COG0184         | Ribosomal protein S15P/S13E                                                      |
| TS28Clo03785 CDS CDS          | 3.0  | 1.0  | 13.6 | J | COG0495         | Leucyl-tRNA synthetase                                                           |
| Casp3650 CDS CDS              | 6.0  | 2.0  | 13.6 | J | COG0532         | Translation initiation factor 2 (IF-2; GTPase)                                   |
| TS29Rum21000 CDS CDS          | 6.0  | 2.0  | 13.6 | J | COG0199         | Ribosomal protein S14                                                            |
| Bhan0161 CDS CDS              | 3.0  | 1.0  | 13.6 | J | COG0222         | Ribosomal protein L7/L12                                                         |
| Msmi741072 CDS CDS            | 0.8  | 0.3  | 13.6 | J | COG0102 COG0103 | Ribosomal protein L13 Ribosomal protein S9                                       |
| Dlon0477 CDS CDS              | 1.5  | 0.5  | 13.6 | J | COG0360         | Ribosomal protein S6                                                             |
| Acac316 CDS CDS               | 3.0  | 1.0  | 13.6 | J | COG0100         | Ribosomal protein S11                                                            |
| Aput1243 CDS CDS              | 15.0 | 5.0  | 13.6 | J | COG0017         | Aspartyl/asparaginyl-tRNA synthetases                                            |
| BDI1432 CDS acetyltransferase | 3.0  | 1.0  | 13.6 | J | COG1670         | Acetyltransferases, including N-acetylases of ribosomal proteins                 |
| Msmi750606 CDS CDS            | 0.8  | 0.3  | 13.6 | J | COG0102 COG0103 | Ribosomal protein L13 Ribosomal protein S9                                       |
| TS28Eub2928 CDS CDS           | 3.0  | 1.0  | 13.6 | J | COG0088         | Ribosomal protein L4                                                             |
| Dfor0679 CDS CDS              | 3.0  | 1.0  | 13.6 | J | COG1544         | Ribosome-associated protein Y (PSrp-1)                                           |
| TS28Eub0835 CDS CDS           | 3.0  | 1.0  | 13.6 | J | COG0052         | Ribosomal protein S2                                                             |
| TS29Fae07124 CDS CDS          | 3.0  | 1.0  | 13.6 | J | COG0099         | Ribosomal protein S13                                                            |
| TS28Rum02498 CDS CDS          | 1.5  | 0.5  | 13.6 | J | COG0017         | Aspartyl/asparaginyl-tRNA synthetases                                            |
| TS28Eub8303 CDS CDS           | 1.5  | 0.5  | 13.6 | J | COG0091         | Ribosomal protein L22                                                            |
| TS29Fae02038 CDS CDS          | 3.0  | 1.0  | 13.6 | J | COG0480         | Translation elongation factors (GTPases)                                         |
| Msmi750131 CDS CDS            | 1.5  | 0.5  | 13.6 | J | COG1097         | RNA-binding protein Rrp4 and related proteins (contain S1 domain and KH domain)  |
| Aput0545 CDS CDS              | 3.0  | 1.0  | 13.6 | J | COG0089         | Ribosomal protein L23                                                            |
| Rtor0508 CDS CDS              | 1.5  | 0.5  | 13.6 | J | COG1841         | Ribosomal protein L30/L7E                                                        |
| Ehal1398 CDS CDS              | 1.5  | 0.5  | 13.6 | J | COG0186         | Ribosomal protein S17                                                            |
| TS28Dor0199 CDS CDS           | 1.5  | 0.5  | 13.6 | J | COG0360         | Ribosomal protein S6                                                             |
| TS28Eub8309 CDS CDS           | 3.0  | 1.0  | 13.6 | J | COG0199         | Ribosomal protein S14                                                            |
| Casp0948 CDS CDS              | 3.0  | 1.0  | 13.6 | J | COG0098         | Ribosomal protein S5                                                             |
| TS28Rum12913 CDS CDS          | 3.0  | 1.0  | 13.6 | J | COG1825         | Ribosomal protein L25 (general stress protein Ctc)                               |
| TS29Par346 CDS CDS            | 6.0  | 2.0  | 13.6 | J | COG1186         | Protein chain release factor B                                                   |
| TS28Rum10131 CDS CDS          | 1.5  | 0.5  | 13.6 | J | COG1841         | Ribosomal protein L30/L7E                                                        |
| Acac3258 CDS CDS              | 6.0  | 2.0  | 13.6 | J | COG2265         | SAM-dependent methyltransferases related to tRNA (uracil-5-)-methyltransferase   |
| TS29Bac03357 CDS CDS          | 1.5  | 0.5  | 13.6 | J | COG0008         | Glutamyl- and glutaminyl-tRNA synthetases                                        |
| Robe2994 CDS CDS              | 1.5  | 0.5  | 13.6 | J | COG0564         | Pseudouridylate synthases, 23S RNA-specific                                      |
| Buni0869 CDS CDS              | 3.0  | 1.0  | 13.6 | J | COG0124         | Histidyl-tRNA synthetase                                                         |
| Dfor1295 CDS CDS              | 6.0  | 2.0  | 13.6 | J | COG0089         | Ribosomal protein L23                                                            |
| TS28Met0811 CDS CDS           | 0.8  | 0.3  | 13.6 | J | COG0102 COG0103 | Ribosomal protein L13 Ribosomal protein S9                                       |
| Acac2792 CDS CDS              | 3.0  | 1.0  | 13.6 | J | COG0081         | Ribosomal protein L1                                                             |
| TS28Fae14973 CDS CDS          | 4.5  | 1.5  | 13.6 | J | COG0264         | Translation elongation factor Ts                                                 |
| Rena0725 CDS CDS              | 9.0  | 3.0  | 13.6 | J | COG0102         | Ribosomal protein L13                                                            |
| TS29Clo3379 CDS CDS           | 9.0  | 3.0  | 13.6 | J | COG0096         | Ribosomal protein S8                                                             |
| TS29Bac03383 CDS CDS          | 14.9 | 5.0  | 13.5 | J | COG0335         | Ribosomal protein L19                                                            |
| TS28Bif0827 CDS CDS           | 3.7  | 1.3  | 13.4 | J | COG0199         | Ribosomal protein S14                                                            |
| TS29Bif3787 CDS CDS           | 3.7  | 1.3  | 13.4 | J | COG0199         | Ribosomal protein S14                                                            |
| Bxyl1687 CDS CDS              | 15.7 | 5.3  | 13.4 | J | COG0480         | Translation elongation factors (GTPases)                                         |
| BactD14457 CDS CDS            | 8.8  | 3.0  | 13.3 | J | COG0197         | Ribosomal protein L16/L10E                                                       |
| Bxyl1678 CDS CDS              | 8.8  | 3.0  | 13.3 | J | COG0197         | Ribosomal protein L16/L10E                                                       |
| TS29Bac09453 CDS CDS          | 8.8  | 3.0  | 13.3 | J | COG0197         | Ribosomal protein L16/L10E                                                       |
| Beat1281 CDS CDS              | 0.7  | 0.3  | 13.3 | J | COG0050         | GTPases - translation elongation factors                                         |
| Rtor2123 CDS CDS              | 5.8  | 2.0  | 13.2 | J | COG0211         | Ribosomal protein L27                                                            |
| TS28Fae18887 CDS CDS          | 62.2 | 21.5 | 13.1 | J | COG0480         | Translation elongation factors (GTPases)                                         |
| TS28Fae17754 CDS CDS          | 4.3  | 1.5  | 13.1 | J | COG0184         | Ribosomal protein S15P/S13E                                                      |
| Bxyl3165 CDS CDS              | 4.3  | 1.5  | 13.1 | J | COG3743 COG0261 | Uncharacterized conserved protein Ribosomal protein L21                          |
| BactD12745 CDS CDS            | 4.3  | 1.5  | 13.1 | J | COG3743 COG0261 | Uncharacterized conserved protein Ribosomal protein L21                          |
| Caer1926 CDS CDS              | 17.2 | 6.0  | 13.0 | J | COG0050         | GTPases - translation elongation factors                                         |
| Bste2309 CDS CDS              | 2.9  | 1.0  | 13.0 | J | COG0081         | Ribosomal protein L1                                                             |
| TS28Fae22837 CDS CDS          | 16.7 | 5.8  | 13.0 | J | COG0255         | Ribosomal protein L29                                                            |
| TS29Fae05292 CDS CDS          | 16.7 | 5.8  | 13.0 | J | COG0255         | Ribosomal protein L29                                                            |
| BactD11553 CDS CDS            | 1.7  | 0.6  | 13.0 | J | COG0264         | Translation elongation factor Ts                                                 |
| Msmi750166 CDS CDS            | 2.9  | 1.0  | 12.9 | J | COG1358         | Ribosomal protein HS6-tvpe (S12/L30/L7a)                                         |
| TS29Rum13740 CDS CDS          | 91.0 | 32.0 | 12.9 | J | COG0092         | Ribosomal protein S3                                                             |
| TS28Fae00364 CDS CDS          | 4.3  | 1.5  | 12.9 | J | COG0008         | Glutamyl- and glutaminyl-tRNA synthetases                                        |
| Bfin1667 CDS CDS              | 5.1  | 1.8  | 12.7 | J | COG0222         | Ribosomal protein L7/L12                                                         |
| Buni1537 CDS CDS              | 7.0  | 2.5  | 12.7 | J | COG0621         | 2-methylthioadenine synthetase                                                   |
| Aput0475 CDS CDS              | 14.0 | 5.0  | 12.7 | J | COG0809         | S-adenosylmethionine:tRNA-ribosyltransferase-isomerase (queuine synthetase)      |
| BactD20041 CDS CDS            | 5.6  | 2.0  | 12.7 | J | COG0480         | Translation elongation factors (GTPases)                                         |
| Bova3923 CDS CDS              | 5.6  | 2.0  | 12.6 | J | COG0525         | Valyl-tRNA synthetase                                                            |
| Rtor0525 CDS CDS              | 11.1 | 4.0  | 12.6 | J | COG0088         | Ribosomal protein L4                                                             |
| TS29Bac05586 CDS CDS          | 8.3  | 3.0  | 12.5 | J | COG0227         | Ribosomal protein L28                                                            |
| Buni1535 CDS CDS              | 8.3  | 3.0  | 12.5 | J | COG0227         | Ribosomal protein L28                                                            |
| TS28Fae20865 CDS CDS          | 67.4 | 24.5 | 12.5 | J | COG0050         | GTPases - translation elongation factors                                         |
| TS29Fae07576 CDS CDS          | 11.0 | 4.0  | 12.5 | J | COG0333         | Ribosomal protein L32                                                            |
| BactD11129 CDS CDS            | 5.5  | 2.0  | 12.4 | J | COG0335         | Ribosomal protein L19                                                            |
| TS29Rum16828 CDS CDS          | 80.7 | 29.5 | 12.4 | J | COG1544         | Ribosome-associated protein Y (PSrp-1)                                           |
| TS29Bac09462 CDS CDS          | 19.1 | 7.0  | 12.4 | J | COG0051         | Ribosomal protein S10                                                            |
| TS29Bif1366 CDS CDS           | 1.4  | 0.5  | 12.4 | J | COG0185         | Ribosomal protein S19                                                            |
| TS28Bif3994 CDS CDS           | 1.4  | 0.5  | 12.4 | J | COG0185         | Ribosomal protein S19                                                            |
| TS29Bac03348 CDS CDS          | 31.8 | 11.7 | 12.4 | J | COG0050         | GTPases - translation elongation factors                                         |
| TS28Fae22095 CDS CDS          | 16.3 | 6.0  | 12.4 | J | COG0244         | Ribosomal protein L10                                                            |
| TS28Fae22833 CDS CDS          | 9.5  | 3.5  | 12.3 | J | COG0099         | Ribosomal protein L5                                                             |
| Bova2660 CDS CDS              | 2.7  | 1.0  | 12.3 | J | COG0231         | Translation elongation factor P (EF-P) translation initiation factor 5A (eIF-5A) |
| Buni0229 CDS CDS              | 29.7 | 11.0 | 12.2 | J | COG1185         | Polyribonucleotide nucleotidyltransferase (polynucleotide phosphorylase)         |
| Dfor1282 CDS CDS              | 8.1  | 3.0  | 12.2 | J | COG0097         | Ribosomal protein L6P/L9E                                                        |

|                      |      |      |      |   |                         |                                                                                                                                                                    |
|----------------------|------|------|------|---|-------------------------|--------------------------------------------------------------------------------------------------------------------------------------------------------------------|
| TS29Fae04377/CDS/CDS | 35.0 | 13.0 | 12.2 | J | COG0256                 | Ribosomal protein L18                                                                                                                                              |
| BactD14471/CDS/CDS   | 5.8  | 2.2  | 12.2 | J | COG0099                 | Ribosomal protein S13                                                                                                                                              |
| Bxyl1662/CDS/CDS     | 5.8  | 2.2  | 12.2 | J | COG0099                 | Ribosomal protein S13                                                                                                                                              |
| TS29Bac11677/CDS/CDS | 5.8  | 2.2  | 12.2 | J | COG0099                 | Ribosomal protein S13                                                                                                                                              |
| BactD10953/CDS/CDS   | 2.7  | 1.0  | 12.2 | J | COG0254                 | Ribosomal protein L31                                                                                                                                              |
| Bxyl4302/CDS/CDS     | 2.7  | 1.0  | 12.2 | J | COG0254                 | Ribosomal protein L31                                                                                                                                              |
| TS29Rum18651/CDS/CDS | 40.1 | 15.0 | 12.1 | J | COG0230                 | Ribosomal protein L34                                                                                                                                              |
| Cbol3498/CDS/CDS     | 2.7  | 1.0  | 12.1 | J | COG0261                 | Ribosomal protein L21                                                                                                                                              |
| Robe0463/CDS/CDS     | 8.0  | 3.0  | 12.1 | J | COG2868                 | Predicted ribosomal protein                                                                                                                                        |
| TS29Rum17165/CDS/CDS | 12.0 | 4.5  | 12.1 | J | COG0238                 | Ribosomal protein S18                                                                                                                                              |
| TS29Bac09464/CDS/CDS | 13.3 | 5.0  | 12.1 | J | COG0048                 | Ribosomal protein S12                                                                                                                                              |
| Caer1974/CDS/CDS     | 1.3  | 0.5  | 12.1 | J | COG0089                 | Ribosomal protein L23                                                                                                                                              |
| Csei2147/CDS/CDS     | 1.3  | 0.5  | 12.1 | J | COG0099                 | Ribosomal protein S13                                                                                                                                              |
| Msmi741035/CDS/CDS   | 0.5  | 0.2  | 12.1 | J | COG0090                 | Ribosomal protein L2                                                                                                                                               |
| TS29Bac09450/CDS/CDS | 13.2 | 5.0  | 12.0 | J | COG0093                 | Ribosomal protein L14                                                                                                                                              |
| Bxyl3415/CDS/CDS     | 6.6  | 2.5  | 11.9 | J | COG1825                 | Ribosomal protein L25 (general stress protein Ctc)                                                                                                                 |
| TS29Rum21005/CDS/CDS | 18.3 | 7.0  | 11.9 | J | COG0091                 | Ribosomal protein L22                                                                                                                                              |
| TS29Bac11674/CDS/CDS | 11.7 | 4.5  | 11.8 | J | COG0024                 | Methionine aminopeptidase                                                                                                                                          |
| Cbol5435/CDS/CDS     | 13.0 | 5.0  | 11.8 | J | COG0198                 | Ribosomal protein L24                                                                                                                                              |
| TS28Rum10132/CDS/CDS | 6.5  | 2.5  | 11.8 | J | COG0098                 | Ribosomal protein S5                                                                                                                                               |
| Caer1975/CDS/CDS     | 6.5  | 2.5  | 11.8 | J | COG0090                 | Ribosomal protein L2                                                                                                                                               |
| TS29Dor0119/CDS/CDS  | 13.0 | 5.0  | 11.8 | J | COG0203                 | Ribosomal protein L17                                                                                                                                              |
| Cbol5939/CDS/CDS     | 13.0 | 5.0  | 11.8 | J | COG1186                 | Protein chain release factor B                                                                                                                                     |
| TS29Met0155/CDS/CDS  | 5.2  | 2.0  | 11.8 | J | COG1534/COG2023         | Predicted RNA-binding protein containing KH domain, possibly ribosomal protein/RNase P subunit RPR2                                                                |
| TS29Rum02975/CDS/CDS | 5.2  | 2.0  | 11.8 | J | COG0049                 | Ribosomal protein S7                                                                                                                                               |
| TS28Rum00134/CDS/CDS | 20.8 | 8.0  | 11.8 | J | COG0522                 | Ribosomal protein S4 and related proteins                                                                                                                          |
| TS29Rum20255/CDS/CDS | 33.6 | 13.0 | 11.7 | J | COG0828                 | Ribosomal protein S21                                                                                                                                              |
| Bxyl2674/CDS/CDS     | 2.6  | 1.0  | 11.7 | J | COG0423                 | Glycyl-tRNA synthetase (class II)                                                                                                                                  |
| Begge2625/CDS/CDS    | 15.4 | 6.0  | 11.6 | J | COG0091                 | Ribosomal protein L22                                                                                                                                              |
| TS29Bac11569/CDS/CDS | 5.1  | 2.0  | 11.6 | J | COG0335                 | Ribosomal protein L19                                                                                                                                              |
| TS28Bac0178/CDS/CDS  | 4.7  | 1.8  | 11.6 | J | COG1187                 | 16S rRNA uridine-516 pseudouridylylate synthase and related pseudouridylylate synthases                                                                            |
| Bthe3731273/CDS/CDS  | 0.6  | 0.3  | 11.5 | J | COG0361                 | Translation initiation factor 1 (IF-1)                                                                                                                             |
| Bthe7330389/CDS/CDS  | 0.6  | 0.3  | 11.5 | J | COG0361                 | Translation initiation factor 1 (IF-1)                                                                                                                             |
| Bova3915/CDS/CDS     | 5.1  | 2.0  | 11.5 | J | COG0539                 | Ribosomal protein S1                                                                                                                                               |
| Robe1742/CDS/CDS     | 2.5  | 1.0  | 11.5 | J | COG0199                 | Ribosomal protein S14                                                                                                                                              |
| TS28Fae20938/CDS/CDS | 7.6  | 3.0  | 11.5 | J | COG0081                 | Ribosomal protein L1                                                                                                                                               |
| Bxyl4315/CDS/CDS     | 0.8  | 0.3  | 11.3 | J | COG4108                 | Peptide chain release factor RF-3                                                                                                                                  |
| Cnex0779/CDS/CDS     | 5.0  | 2.0  | 11.3 | J | COG0049                 | Ribosomal protein S7                                                                                                                                               |
| Cnex2193/CDS/CDS     | 2.5  | 1.0  | 11.3 | J | COG0291                 | Ribosomal protein L35                                                                                                                                              |
| TS28Eub5749/CDS/CDS  | 5.0  | 2.0  | 11.3 | J | COG0081                 | Ribosomal protein L1                                                                                                                                               |
| TS28Dor2168/CDS/CDS  | 2.5  | 1.0  | 11.3 | J | COG2265                 | SAM-dependent methyltransferases related to tRNA (uracil-5-)-methyltransferase                                                                                     |
| Ehal0628/CDS/CDS     | 2.5  | 1.0  | 11.3 | J | COG0048                 | Ribosomal protein S12                                                                                                                                              |
| Dfor1285/CDS/CDS     | 5.0  | 2.0  | 11.3 | J | COG0094                 | Ribosomal protein L5                                                                                                                                               |
| Caer0966/CDS/CDS     | 2.5  | 1.0  | 11.3 | J | COG0102                 | Ribosomal protein L13                                                                                                                                              |
| Msmi741079/CDS/CDS   | 1.3  | 0.5  | 11.3 | J | COG0052                 | Ribosomal protein S2                                                                                                                                               |
| Caer0941/CDS/CDS     | 2.5  | 1.0  | 11.3 | J | COG0012                 | Predicted GTPase, probable translation factor                                                                                                                      |
| TS29Rum01567/CDS/CDS | 5.0  | 2.0  | 11.3 | J | COG0215                 | CysteinyI-tRNA synthetase                                                                                                                                          |
| TS29Bac10926/CDS/CDS | 20.0 | 8.0  | 11.3 | J | COG0184                 | Ribosomal protein S15P/S13E                                                                                                                                        |
| TS28Clo08945/CDS/CDS | 5.0  | 2.0  | 11.3 | J | COG0324                 | tRNA delta(2)-isopentenylpyrophosphate transferase                                                                                                                 |
| Dfor1280/CDS/CDS     | 5.0  | 2.0  | 11.3 | J | COG0098                 | Ribosomal protein S5                                                                                                                                               |
| TS28Fae22819/CDS/CDS | 5.0  | 2.0  | 11.3 | J | COG0257                 | Ribosomal protein L36                                                                                                                                              |
| Csvm1952/CDS/CDS     | 2.5  | 1.0  | 11.3 | J | COG0052                 | Ribosomal protein S2                                                                                                                                               |
| Csei2157/CDS/CDS     | 5.0  | 2.0  | 11.3 | J | COG0256                 | Ribosomal protein L18                                                                                                                                              |
| Aput0079/CDS/CDS     | 7.5  | 3.0  | 11.3 | J | COG0144/COG3270         | tRNA and rRNA cytosine-C5-methylases/Uncharacterized conserved protein                                                                                             |
| TS29Rum13732/CDS/CDS | 63.7 | 25.5 | 11.3 | J | COG0097                 | Ribosomal protein L6P/L9E                                                                                                                                          |
| Cbol5437/CDS/CDS     | 7.5  | 3.0  | 11.3 | J | COG0186                 | Ribosomal protein S17                                                                                                                                              |
| Msmi741545/CDS/CDS   | 3.1  | 1.3  | 11.3 | J | COG0050/COG3276/COG5257 | GTPases - translation elongation factors/Selenocysteine-specific translation elongation factor/Translation initiation factor 2, gamma subunit (eIF-2gamma; GTPase) |
| TS28Rum02469/CDS/CDS | 5.0  | 2.0  | 11.3 | J | COG0050                 | GTPases - translation elongation factors                                                                                                                           |
| TS28Bac6009/CDS/CDS  | 8.2  | 3.3  | 11.2 | J | COG0480                 | Translation elongation factors (GTPases)                                                                                                                           |
| TS29Bac11320/CDS/CDS | 19.7 | 8.0  | 11.2 | J | COG0102                 | Ribosomal protein L13                                                                                                                                              |
| TS29Rum14232/CDS/CDS | 7.2  | 3.0  | 10.9 | J | COG0048                 | Ribosomal protein S12                                                                                                                                              |
| Msmi741054/CDS/CDS   | 1.2  | 0.5  | 10.9 | J | COG0200                 | Ribosomal protein L15                                                                                                                                              |
| Csei0840/CDS/CDS     | 1.2  | 0.5  | 10.9 | J | COG0080                 | Ribosomal protein L11                                                                                                                                              |
| TS28Rum10530/CDS/CDS | 6.0  | 2.5  | 10.9 | J | COG0008                 | Glutamyl- and glutaminyI-tRNA synthetases                                                                                                                          |
| TS28Dor1588/CDS/CDS  | 7.2  | 3.0  | 10.8 | J | COG0522                 | Ribosomal protein S4 and related proteins                                                                                                                          |
| Bxyl1478/CDS/CDS     | 11.9 | 5.0  | 10.8 | J | COG0292                 | Ribosomal protein L20                                                                                                                                              |
| Rena2511/CDS/CDS     | 4.7  | 2.0  | 10.7 | J | COG0100                 | Ribosomal protein S11                                                                                                                                              |
| BactD23545/CDS/CDS   | 5.3  | 2.3  | 10.7 | J | COG0290                 | Translation initiation factor 3 (IF-3)                                                                                                                             |
| Bste2290/CDS/CDS     | 9.4  | 4.0  | 10.7 | J | COG0186                 | Ribosomal protein S17                                                                                                                                              |
| BactD14454/CDS/CDS   | 18.8 | 8.0  | 10.7 | J | COG0185                 | Ribosomal protein S19                                                                                                                                              |
| Bum0616/CDS/CDS      | 16.9 | 7.2  | 10.7 | J | COG0090                 | Ribosomal protein L2                                                                                                                                               |
| TS29Rum17009/CDS/CDS | 63.1 | 27.0 | 10.6 | J | COG0049                 | Ribosomal protein S7                                                                                                                                               |
| Cspl21100/CDS/CDS    | 7.0  | 3.0  | 10.6 | J | COG0050                 | GTPases - translation elongation factors                                                                                                                           |
| Caer0634/CDS/CDS     | 7.0  | 3.0  | 10.6 | J | COG0211                 | Ribosomal protein L27                                                                                                                                              |
| TS29Fae04386/CDS/CDS | 7.0  | 3.0  | 10.6 | J | COG0257                 | Ribosomal protein L36                                                                                                                                              |
| Cbol6231/CDS/CDS     | 9.3  | 4.0  | 10.6 | J | COG0222                 | Ribosomal protein L7/L12                                                                                                                                           |
| Bxyl0484/CDS/CDS     | 2.3  | 1.0  | 10.6 | J | COG0343                 | Queuine/archaeosine tRNA-ribosyltransferase                                                                                                                        |
| Csvm4210/CDS/CDS     | 2.3  | 1.0  | 10.6 | J | COG0256                 | Ribosomal protein L18                                                                                                                                              |
| Bum12581/CDS/CDS     | 14.8 | 6.3  | 10.6 | J | COG0480                 | Translation elongation factors (GTPases)                                                                                                                           |
| TS28Fae22840/CDS/CDS | 5.8  | 2.5  | 10.4 | J | COG0091                 | Ribosomal protein L22                                                                                                                                              |
| BactD20481/CDS/CDS   | 1.1  | 0.5  | 10.4 | J | COG0073/COG0072         | EMAP domain/Phenylalanyl-tRNA synthetase beta subunit                                                                                                              |
| TS29Bac07466/CDS/CDS | 8.0  | 3.5  | 10.4 | J | COG0532                 | Translation initiation factor 2 (IF-2; GTPase)                                                                                                                     |
| Msmi741037/CDS/CDS   | 1.7  | 0.8  | 10.3 | J | COG0091                 | Ribosomal protein L22                                                                                                                                              |
| BactD12039/CDS/CDS   | 1.7  | 0.8  | 10.3 | J | COG0480                 | Translation elongation factors (GTPases)                                                                                                                           |
| TS28Met0974/CDS/CDS  | 1.7  | 0.8  | 10.3 | J | COG0091                 | Ribosomal protein L22                                                                                                                                              |
| Rtor0548/CDS/CDS     | 4.5  | 2.0  | 10.3 | J | COG0049                 | Ribosomal protein S7                                                                                                                                               |
| TS28Rum14509/CDS/CDS | 12.4 | 5.5  | 10.2 | J | COG0184                 | Ribosomal protein S15P/S13E                                                                                                                                        |
| TS29Rum19937/CDS/CDS | 12.4 | 5.5  | 10.2 | J | COG0184                 | Ribosomal protein S15P/S13E                                                                                                                                        |
| TS29Rum11337/CDS/CDS | 4.5  | 2.0  | 10.2 | J | COG0173                 | Aspartyl-tRNA synthetase                                                                                                                                           |
| Cbol5436/CDS/CDS     | 4.5  | 2.0  | 10.2 | J | COG0093                 | Ribosomal protein L14                                                                                                                                              |
| TS28Col1446/CDS/CDS  | 4.5  | 2.0  | 10.2 | J | COG0094                 | Ribosomal protein L5                                                                                                                                               |

|                        |       |       |      |   |                         |                                                                                                          |
|------------------------|-------|-------|------|---|-------------------------|----------------------------------------------------------------------------------------------------------|
| Robe3803/CDS/CDS       | 11.2  | 5.0   | 10.2 | J | COG0100                 | Ribosomal protein S11                                                                                    |
| TS29Rum17218/CDS/CDS   | 7.8   | 3.5   | 10.2 | J | COG0227                 | Ribosomal protein L28                                                                                    |
| TS28Rum14884/CDS/CDS   | 7.8   | 3.5   | 10.2 | J | COG0227                 | Ribosomal protein L28                                                                                    |
| TS28Rum14514/CDS/CDS   | 17.8  | 8.0   | 10.1 | J | COG0532                 | Translation initiation factor 2 (IF-2; GTPase)                                                           |
| TS29Rum21168/CDS/CDS   | 105.0 | 47.5  | 10.0 | J | COG1825                 | Ribosomal protein L25 (general stress protein Ctc)                                                       |
| TS29Col0513/CDS/CDS    | 0.5   | 23.0  | 0.1  | J | COG0024                 | Methionine aminopeptidase                                                                                |
| Cnex3328/CDS/CDS       | 0.1   | 3.1   | 0.1  | J | COG0480                 | Translation elongation factors (GTPases)                                                                 |
| TS29Bif3831/CDS/CDS    | 1.6   | 74.5  | 0.1  | J | COG0172                 | Seryl-tRNA synthetase                                                                                    |
| RintL13310/CDS/CDS     | 0.1   | 3.2   | 0.1  | J | COG0480                 | Translation elongation factors (GTPases)                                                                 |
| TS29Rum16878/CDS/CDS   | 1.0   | 48.0  | 0.1  | J | COG0564                 | Pseudouridylyl synthases, 23S RNA-specific                                                               |
| TS29RumUnc0086/CDS/CDS | 2.0   | 96.0  | 0.1  | J | COG0173                 | Aspartyl-tRNA synthetase                                                                                 |
| TS29Bif3328/CDS/CDS    | 0.8   | 36.6  | 0.1  | J | COG0162                 | Tyrosyl-tRNA synthetase                                                                                  |
| TS29Bif3761/CDS/CDS    | 0.5   | 24.4  | 0.1  | J | COG0102                 | Ribosomal protein L13                                                                                    |
| TS28Bif0864/CDS/CDS    | 0.5   | 24.4  | 0.1  | J | COG0102                 | Ribosomal protein L13                                                                                    |
| TS28Fae22788/CDS/CDS   | 0.5   | 24.5  | 0.1  | J | COG0621                 | 2-methylthioadenine synthetase                                                                           |
| TS29Col1050/CDS/CDS    | 0.5   | 26.0  | 0.1  | J | COG0441                 | Threonyl-tRNA synthetase                                                                                 |
| TS29Col1254/CDS/CDS    | 1.0   | 52.0  | 0.1  | J | COG4108                 | Peptide chain release factor RF-3                                                                        |
| TS29Col0853/CDS/CDS    | 1.0   | 53.0  | 0.1  | J | COG0018                 | Arginyl-tRNA synthetase                                                                                  |
| TS29Col1724/CDS/CDS    | 0.5   | 26.5  | 0.1  | J | COG0264                 | Translation elongation factor Ts                                                                         |
| TS28Bif4917/CDS/CDS    | 0.5   | 26.5  | 0.1  | J | COG0242                 | N-formylmethionyl-tRNA deformylase                                                                       |
| TS29Bif3482/CDS/CDS    | 0.5   | 26.5  | 0.1  | J | COG0242                 | N-formylmethionyl-tRNA deformylase                                                                       |
| Robe3326/CDS/CDS       | 0.2   | 11.0  | 0.1  | J | COG2265                 | SAM-dependent methyltransferases related to tRNA (uracil-5)-methyltransferase                            |
| TS28Bif2061/CDS/CDS    | 0.8   | 46.5  | 0.1  | J | COG0018                 | Arginyl-tRNA synthetase                                                                                  |
| TS29Col1679/CDS/CDS    | 0.5   | 28.0  | 0.1  | J | COG0621                 | 2-methylthioadenine synthetase                                                                           |
| Ccom1270/CDS/CDS       | 0.3   | 14.0  | 0.1  | J | COG1190                 | Lysyl-tRNA synthetase (class II)                                                                         |
| TS29Col1113/CDS/CDS    | 1.0   | 56.0  | 0.1  | J | COG0173                 | Aspartyl-tRNA synthetase                                                                                 |
| TS28Fae01734/CDS/CDS   | 0.5   | 28.0  | 0.1  | J | COG0594                 | RNase P protein component                                                                                |
| TS29Rum12540/CDS/CDS   | 1.0   | 57.0  | 0.1  | J | COG0480                 | Translation elongation factors (GTPases)                                                                 |
| TS29Bif0190/CDS/CDS    | 0.8   | 43.2  | 0.1  | J | COG0064                 | Asp-tRNAAsn/Glu-tRNA <sub>Gln</sub> amidotransferase B subunit (PET112 homolog)                          |
| TS29Bif3726/CDS/CDS    | 2.2   | 126.7 | 0.1  | J | COG1185                 | Polyribonucleotide nucleotidyltransferase (polynucleotide phosphorylase)                                 |
| TS29Fae00174/CDS/CDS   | 0.8   | 48.0  | 0.1  | J | COG0564                 | Pseudouridylyl synthases, 23S RNA-specific                                                               |
| TS29Bif1379/CDS/CDS    | 0.2   | 13.0  | 0.1  | J | COG0098                 | Ribosomal protein S5                                                                                     |
| TS28Bif1917/CDS/CDS    | 0.3   | 14.8  | 0.1  | J | COG0441                 | Threonyl-tRNA synthetase                                                                                 |
| Bnse1165/CDS/CDS       | 0.3   | 19.7  | 0.1  | J | COG1530                 | Ribonucleases G and E                                                                                    |
| TS29Rum20529/CDS/CDS   | 1.0   | 60.0  | 0.1  | J | COG2265                 | SAM-dependent methyltransferases related to tRNA (uracil-5)-methyltransferase                            |
| TS28Bif4800/CDS/CDS    | 0.3   | 15.2  | 0.1  | J | COG0048                 | Ribosomal protein S12                                                                                    |
| TS29Bif3378/CDS/CDS    | 0.3   | 15.2  | 0.1  | J | COG0048                 | Ribosomal protein S12                                                                                    |
| TS29Bif4099/CDS/CDS    | 1.7   | 101.8 | 0.1  | J | COG0480                 | Translation elongation factors (GTPases)                                                                 |
| TS28Bif0647/CDS/CDS    | 0.5   | 28.4  | 0.1  | J | COG0024                 | Methionine aminopeptidase                                                                                |
| TS29Bif3938/CDS/CDS    | 0.5   | 28.4  | 0.1  | J | COG0024                 | Methionine aminopeptidase                                                                                |
| TS29Rum19839/CDS/CDS   | 0.5   | 32.0  | 0.1  | J | COG1187                 | 16S rRNA uridine-516 pseudouridylyl synthase and related pseudouridylyl synthases                        |
| Csci3178/CDS/CDS       | 0.1   | 4.4   | 0.1  | J | COG0480                 | Translation elongation factors (GTPases)                                                                 |
| Edol0293/CDS/CDS       | 0.1   | 4.4   | 0.1  | J | COG0480                 | Translation elongation factors (GTPases)                                                                 |
| Clep2037/CDS/CDS       | 0.1   | 4.4   | 0.1  | J | COG0480                 | Translation elongation factors (GTPases)                                                                 |
| Bhan1170/CDS/CDS       | 0.1   | 4.4   | 0.1  | J | COG0480                 | Translation elongation factors (GTPases)                                                                 |
| TS29Clo4568/CDS/CDS    | 0.1   | 4.4   | 0.1  | J | COG0480                 | Translation elongation factors (GTPases)                                                                 |
| Rena3445/CDS/CDS       | 0.1   | 4.4   | 0.1  | J | COG0480                 | Translation elongation factors (GTPases)                                                                 |
| Robe2636/CDS/CDS       | 0.1   | 4.4   | 0.1  | J | COG0480                 | Translation elongation factors (GTPases)                                                                 |
| TS29Bif3934/CDS/CDS    | 1.0   | 66.8  | 0.1  | J | COG0442                 | Prolyl-tRNA synthetase                                                                                   |
| TS29Bif3567/CDS/CDS    | 1.7   | 112.5 | 0.1  | J | COG0143                 | Methionyl-tRNA synthetase                                                                                |
| TS29Bif2069/CDS/CDS    | 0.3   | 17.1  | 0.1  | J | COG0532                 | Translation initiation factor 2 (IF-2; GTPase)                                                           |
| TS29Met0199/CDS/CDS    | 0.4   | 28.0  | 0.1  | J | COG0060/COG0525/COG0495 | Isoleucyl-tRNA synthetase/Valyl-tRNA synthetase/Leucyl-tRNA synthetase                                   |
| TS29Rum15211/CDS/CDS   | 0.5   | 35.0  | 0.1  | J | COG0564                 | Pseudouridylyl synthases, 23S RNA-specific                                                               |
| TS29Bif2700/CDS/CDS    | 0.3   | 17.8  | 0.1  | J | COG0264                 | Translation elongation factor Ts                                                                         |
| TS28Bif1987/CDS/CDS    | 0.3   | 17.8  | 0.1  | J | COG0264                 | Translation elongation factor Ts                                                                         |
| TS28Fae20099/CDS/CDS   | 0.5   | 36.0  | 0.1  | J | COG0060                 | Isoleucyl-tRNA synthetase                                                                                |
| TS28Bif0652/CDS/CDS    | 1.0   | 77.8  | 0.1  | J | COG0442                 | Prolyl-tRNA synthetase                                                                                   |
| Bthe3732590/CDS/CDS    | 0.2   | 14.7  | 0.1  | J | COG0480                 | Translation elongation factors (GTPases)                                                                 |
| TS29Bif3025/CDS/CDS    | 0.8   | 59.7  | 0.1  | J | COG0012                 | Predicted GTPase, probable translation factor                                                            |
| TS29Rum13828/CDS/CDS   | 0.5   | 43.5  | 0.1  | J | COG0144/COG3270         | tRNA and rRNA cytosine-C5-methylases/Uncharacterized conserved protein                                   |
| TS29Bif1520/CDS/CDS    | 0.3   | 22.1  | 0.1  | J | COG0442                 | Prolyl-tRNA synthetase                                                                                   |
| Svar2455/CDS/CDS       | 1.0   | 87.2  | 0.1  | J | COG0480                 | Translation elongation factors (GTPases)                                                                 |
| Ccom2219/CDS/CDS       | 1.0   | 87.2  | 0.1  | J | COG0480                 | Translation elongation factors (GTPases)                                                                 |
| Cmet2527/CDS/CDS       | 1.0   | 87.2  | 0.1  | J | COG0480                 | Translation elongation factors (GTPases)                                                                 |
| CspM6211935/CDS/CDS    | 1.0   | 87.2  | 0.1  | J | COG0480                 | Translation elongation factors (GTPases)                                                                 |
| TS29Bif0825/CDS/CDS    | 0.3   | 23.3  | 0.0  | J | COG0336/COG4752         | tRNA-(guanine-N1)-methyltransferase/Uncharacterized protein conserved in bacteria                        |
| TS28Bif0460/CDS/CDS    | 0.3   | 23.3  | 0.0  | J | COG0336/COG4752         | tRNA-(guanine-N1)-methyltransferase/Uncharacterized protein conserved in bacteria                        |
| Dfor1337/CDS/CDS       | 0.1   | 14.0  | 0.0  | J | COG0525                 | Valyl-tRNA synthetase                                                                                    |
| Dfor0369/CDS/CDS       | 0.3   | 24.5  | 0.0  | J | COG1190                 | Lysyl-tRNA synthetase (class II)                                                                         |
| TS29Fae00886/CDS/CDS   | 0.5   | 49.0  | 0.0  | J | COG0482                 | Predicted tRNA(5-methylaminomethyl-2-thiouridylyl) methyltransferase, contains the PP-loop ATPase domain |
| TS28Bif1123/CDS/CDS    | 0.5   | 49.3  | 0.0  | J | COG0008                 | Glutamyl- and glutaminyl-tRNA synthetases                                                                |
| Bsp1160235/CDS/CDS     | 0.3   | 26.3  | 0.0  | J | COG0480                 | Translation elongation factors (GTPases)                                                                 |
| TS28Bif4153/CDS/CDS    | 0.3   | 26.1  | 0.0  | J | COG0442                 | Prolyl-tRNA synthetase                                                                                   |
| TS28Fae10791/CDS/CDS   | 0.3   | 26.5  | 0.0  | J | COG0012                 | Predicted GTPase, probable translation factor                                                            |
| TS29Bif3762/CDS/CDS    | 0.1   | 15.3  | 0.0  | J | COG0103                 | Ribosomal protein S9                                                                                     |
| TS29Bif2797/CDS/CDS    | 1.3   | 134.6 | 0.0  | J | COG0441                 | Threonyl-tRNA synthetase                                                                                 |
| Acae2285/CDS/CDS       | 0.1   | 7.7   | 0.0  | J | COG0480                 | Translation elongation factors (GTPases)                                                                 |
| TS28Bif4388/CDS/CDS    | 0.5   | 58.8  | 0.0  | J | COG0030                 | Dimethyladenosine transferase (rRNA methylation)                                                         |
| TS29Bif0456/CDS/CDS    | 0.5   | 58.8  | 0.0  | J | COG0030                 | Dimethyladenosine transferase (rRNA methylation)                                                         |
| TS29Rum16537/CDS/CDS   | 0.5   | 60.5  | 0.0  | J | COG2265                 | SAM-dependent methyltransferases related to tRNA (uracil-5)-methyltransferase                            |
| TS28Bif0903/CDS/CDS    | 0.2   | 24.5  | 0.0  | J | COG1185                 | Polyribonucleotide nucleotidyltransferase (polynucleotide phosphorylase)                                 |
| TS29Bif3639/CDS/CDS    | 0.8   | 106.5 | 0.0  | J | COG0018                 | Arginyl-tRNA synthetase                                                                                  |
| TS28Bif0662/CDS/CDS    | 0.3   | 33.3  | 0.0  | J | COG0009                 | Putative translation factor (SUA5)                                                                       |
| TS29Fae00305/CDS/CDS   | 0.5   | 70.5  | 0.0  | J | COG0144/COG3270         | tRNA and rRNA cytosine-C5-methylases/Uncharacterized conserved protein                                   |
| TS29Bif4038/CDS/CDS    | 0.5   | 71.7  | 0.0  | J | COG0124                 | Histidyl-tRNA synthetase                                                                                 |
| TS29Bif1289/CDS/CDS    | 0.5   | 73.0  | 0.0  | J | COG1185                 | Polyribonucleotide nucleotidyltransferase (polynucleotide phosphorylase)                                 |
| TS29Bif0640/CDS/CDS    | 0.5   | 73.3  | 0.0  | J | COG0008                 | Glutamyl- and glutaminyl-tRNA synthetases                                                                |
| TS29Fae03432/CDS/CDS   | 0.5   | 86.5  | 0.0  | J | COG0042                 | tRNA-dihydrouridine synthase                                                                             |

|                                        |      |      |       |         |                                                 |                                                                                                                                                                                                                                                                 |
|----------------------------------------|------|------|-------|---------|-------------------------------------------------|-----------------------------------------------------------------------------------------------------------------------------------------------------------------------------------------------------------------------------------------------------------------|
| TS28Bif4914 CDS CDS                    | 0.3  | 43.6 | 0.0   | J       | COG1186                                         | Protein chain release factor B                                                                                                                                                                                                                                  |
| TS29Bif3479 CDS CDS                    | 0.3  | 43.6 | 0.0   | J       | COG1186                                         | Protein chain release factor B                                                                                                                                                                                                                                  |
| TS29Bif3327 CDS CDS                    | 0.5  | 99.8 | 0.0   | J       | COG0532                                         | Translation initiation factor 2 (IF-2; GTPase)                                                                                                                                                                                                                  |
| TS29Bif3848 CDS CDS                    | 0.3  | 59.8 | 0.0   | J       | COG1190 COG2898                                 | Lysyl-tRNA synthetase (class II) Uncharacterized conserved protein                                                                                                                                                                                              |
| TS28Bif0755 CDS CDS                    | 0.3  | 59.8 | 0.0   | J       | COG1190 COG2898                                 | Lysyl-tRNA synthetase (class II) Uncharacterized conserved protein                                                                                                                                                                                              |
| Bxyl3345 CDS CDS                       | 6.1  | 2.5  | 11.0  | J E K L | COG0454 COG1670 COG2818 COG2320 COG0456 COG0346 | Histone acetyltransferase HPA2 and related acetyltransferases Acetyltransferases, including N-acetylases of ribosomal proteins 3-methyladenine DNA glycosylase Uncharacterized conserved protein Acetyltransferases Lactoylglutathione lyase and related lyases |
| Csci0722 CDS CDS                       | 8.0  | 2.0  | 18.2  | J F     | COG0572 COG0441                                 | Uridine kinase Threonyl-tRNA synthetase                                                                                                                                                                                                                         |
| BactD11169 CDS CDS                     | 8.0  | 3.5  | 10.4  | J F     | COG0572 COG0441                                 | Uridine kinase Threonyl-tRNA synthetase                                                                                                                                                                                                                         |
| Bnse0475 CDS CDS                       | 2.0  | 0.5  | 18.2  | J K L   | COG0513                                         | Superfamily II DNA and RNA helicases                                                                                                                                                                                                                            |
| TS28Met0755 CDS CDS                    | 3.8  | 1.1  | 16.1  | J L     | COG0532 COG1372                                 | Translation initiation factor 2 (IF-2; GTPase) Intein/homing endonuclease                                                                                                                                                                                       |
| BactD10461 CDS CDS                     | 8.5  | 2.5  | 15.4  | J L     | COG1670 COG2818 COG2320                         | Acetyltransferases, including N-acetylases of ribosomal proteins 3-methyladenine DNA glycosylase Uncharacterized conserved protein                                                                                                                              |
| BDI1477 CDS acetyltransferase          | 5.0  | 2.0  | 11.3  | J L     | COG1670 COG2818 COG2320                         | Acetyltransferases, including N-acetylases of ribosomal proteins 3-methyladenine DNA glycosylase Uncharacterized conserved protein                                                                                                                              |
| TS29Bac03896 CDS CDS                   | 1.0  | 47.0 | 0.1   | J L     | COG1112 COG0539                                 | Superfamily I DNA and RNA helicases and helicase subunits Ribosomal protein S1                                                                                                                                                                                  |
| BDI1691 CDS phosphoglucosyltransferase | 10.0 | 4.0  | 11.3  | J M G   | COG1208 COG1210 COG1109                         | Nucleoside-diphosphate-sugar pyrophosphorylase involved in lipopolysaccharide biosynthesis translation initiation factor 2B, gamma/epsilon subunits (eIF-2Bgamma/eIF-2Bepsilon) UDP-glucose pyrophosphorylase Phosphomannomutase                                |
| Beap1540 CDS CDS                       | 17.0 | 1.0  | 77.2  | J M I   | COG0539 COG0761                                 | Ribosomal protein S1 Penicillin tolerance protein                                                                                                                                                                                                               |
| Acae3518 CDS CDS                       | 7.3  | 1.0  | 33.3  | J M I   | COG0539 COG0761                                 | Ribosomal protein S1 Penicillin tolerance protein                                                                                                                                                                                                               |
| CspM6210271 CDS CDS                    | 7.0  | 1.0  | 31.8  | J M I   | COG0539 COG0761                                 | Ribosomal protein S1 Penicillin tolerance protein                                                                                                                                                                                                               |
| Ehal1349 CDS CDS                       | 6.8  | 1.5  | 20.7  | J M I   | COG0539 COG0761                                 | Ribosomal protein S1 Penicillin tolerance protein                                                                                                                                                                                                               |
| FpraM2122358 CDS CDS                   | 83.4 | 34.0 | 11.1  | J M I   | COG0539 COG0761                                 | Ribosomal protein S1 Penicillin tolerance protein                                                                                                                                                                                                               |
| Robe1488 CDS CDS                       | 26.2 | 11.5 | 10.3  | J M I   | COG0539 COG0761                                 | Ribosomal protein S1 Penicillin tolerance protein                                                                                                                                                                                                               |
| Cbo11182 CDS CDS                       | 20.0 | 9.0  | 10.1  | J M I   | COG0539 COG0761                                 | Ribosomal protein S1 Penicillin tolerance protein                                                                                                                                                                                                               |
| BactD14439 CDS CDS                     | 13.2 | 0.3  | 180.3 | K       | COG0250                                         | Transcription antiterminator                                                                                                                                                                                                                                    |
| Buni0213 CDS CDS                       | 15.7 | 1.0  | 71.1  | K       | COG0195                                         | Transcription elongation factor                                                                                                                                                                                                                                 |
| TS28Rum14419 CDS CDS                   | 7.8  | 0.5  | 71.1  | K       | COG1609                                         | Transcriptional regulators                                                                                                                                                                                                                                      |
| TS29Bac11680 CDS CDS                   | 7.2  | 0.5  | 65.6  | K       | COG0202                                         | DNA-directed RNA polymerase, alpha subunit/40 kD subunit                                                                                                                                                                                                        |
| Robe0625 CDS CDS                       | 76.2 | 6.0  | 57.6  | K       | COG1595                                         | DNA-directed RNA polymerase specialized sigma subunit, sigma24 homolog                                                                                                                                                                                          |
| TS28Rum10463 CDS CDS                   | 12.0 | 1.0  | 54.5  | K       | COG1420                                         | Transcriptional regulator of heat shock gene                                                                                                                                                                                                                    |
| Caer1004 CDS CDS                       | 11.0 | 1.0  | 49.9  | K       | COG1609                                         | Transcriptional regulators                                                                                                                                                                                                                                      |
| TS28Fae13861 CDS CDS                   | 5.5  | 0.5  | 49.9  | K       | COG0195                                         | Transcription elongation factor                                                                                                                                                                                                                                 |
| Bxyl1979 CDS CDS                       | 2.8  | 0.3  | 49.9  | K       | COG0557                                         | Exoribonuclease R                                                                                                                                                                                                                                               |
| Cbo12921 CDS CDS                       | 10.7 | 1.0  | 48.4  | K       | COG1278                                         | Cold shock proteins                                                                                                                                                                                                                                             |
| Bxyl2502 CDS CDS                       | 2.7  | 0.3  | 37.3  | K       | COG0195                                         | Transcription elongation factor                                                                                                                                                                                                                                 |
| Bfin1666 CDS CDS                       | 3.8  | 0.5  | 34.2  | K       | COG0085                                         | DNA-directed RNA polymerase, beta subunit/140 kD subunit                                                                                                                                                                                                        |
| Bxyl1659 CDS CDS                       | 7.5  | 1.0  | 34.1  | K       | COG0202                                         | DNA-directed RNA polymerase, alpha subunit/40 kD subunit                                                                                                                                                                                                        |
| DpjaATC0212 CDS CDS                    | 7.5  | 1.0  | 34.0  | K       | COG0568                                         | DNA-directed RNA polymerase, sigma subunit (sigma70/sigma32)                                                                                                                                                                                                    |
| TS28Rum16432 CDS CDS                   | 7.5  | 1.0  | 34.0  | K       | COG1959                                         | Predicted transcriptional regulator                                                                                                                                                                                                                             |
| TS29Rum04952 CDS CDS                   | 4.7  | 0.7  | 31.8  | K       | COG0250                                         | Transcription antiterminator                                                                                                                                                                                                                                    |
| TS29Bac07474 CDS CDS                   | 6.8  | 1.0  | 30.6  | K       | COG1595                                         | DNA-directed RNA polymerase specialized sigma subunit, sigma24 homolog                                                                                                                                                                                          |
| Bova0437 CDS CDS                       | 3.3  | 0.5  | 29.9  | K       | COG0568                                         | DNA-directed RNA polymerase, sigma subunit (sigma70/sigma32)                                                                                                                                                                                                    |
| BactD21826 CDS CDS                     | 3.3  | 0.5  | 29.9  | K       | COG0568                                         | DNA-directed RNA polymerase, sigma subunit (sigma70/sigma32)                                                                                                                                                                                                    |
| FpraM2121830 CDS CDS                   | 6.6  | 1.0  | 29.9  | K       | COG1420                                         | Transcriptional regulator of heat shock gene                                                                                                                                                                                                                    |

|                      |      |      |      |   |                 |                                                                                                                                       |
|----------------------|------|------|------|---|-----------------|---------------------------------------------------------------------------------------------------------------------------------------|
| TS28Fae18996/CDS/CDS | 6.5  | 1.0  | 29.5 | K | COG1595         | DNA-directed RNA polymerase specialized sigma subunit, sigma24 homolog                                                                |
| Bthe3732368/CDS/CDS  | 9.3  | 1.5  | 28.0 | K | COG1595         | DNA-directed RNA polymerase specialized sigma subunit, sigma24 homolog                                                                |
| Bfin0906/CDS/CDS     | 9.3  | 1.5  | 28.0 | K | COG1595         | DNA-directed RNA polymerase specialized sigma subunit, sigma24 homolog                                                                |
| Bthe7331684/CDS/CDS  | 9.3  | 1.5  | 28.0 | K | COG1595         | DNA-directed RNA polymerase specialized sigma subunit, sigma24 homolog                                                                |
| BactD12633/CDS/CDS   | 9.3  | 1.5  | 28.0 | K | COG1595         | DNA-directed RNA polymerase specialized sigma subunit, sigma24 homolog                                                                |
| Shisp9D91146/CDS/CDS | 6.0  | 1.0  | 27.2 | K | COG1414         | Transcriptional regulator                                                                                                             |
| CspM6210742/CDS/CDS  | 3.0  | 0.5  | 27.2 | K | COG0568         | DNA-directed RNA polymerase, sigma subunit (sigma70/sigma32)                                                                          |
| BactD24488/CDS/CDS   | 5.4  | 1.0  | 24.5 | K | COG1475         | Predicted transcriptional regulators                                                                                                  |
| Robe1907/CDS/CDS     | 15.8 | 3.0  | 23.8 | K | COG1278         | Cold shock proteins                                                                                                                   |
| Bum1628/CDS/CDS      | 1.7  | 0.3  | 22.7 | K | COG2183         | Transcriptional accessory protein                                                                                                     |
| Rumhvd1096/CDS/CDS   | 5.0  | 1.0  | 22.7 | K | COG1609         | Transcriptional regulators                                                                                                            |
| Rint1.12661/CDS/CDS  | 5.0  | 1.0  | 22.7 | K | COG1158         | Transcription termination factor                                                                                                      |
| BactD20038/CDS/CDS   | 7.4  | 1.5  | 22.5 | K | COG0085         | DNA-directed RNA polymerase, beta subunit/140 kD subunit                                                                              |
| Bova1640/CDS/CDS     | 2.5  | 0.5  | 22.2 | K | COG0846         | NAD-dependent protein deacetylases, SIR2 family                                                                                       |
| Bxyl3700/CDS/CDS     | 9.8  | 2.0  | 22.1 | K | COG1595         | DNA-directed RNA polymerase specialized sigma subunit, sigma24 homolog                                                                |
| Robo0752/CDS/CDS     | 13.5 | 2.8  | 21.6 | K | COG0086         | DNA-directed RNA polymerase, beta' subunit/160 kD subunit                                                                             |
| TS28Fae19034/CDS/CDS | 1.6  | 0.3  | 21.6 | K | COG0782         | Transcription elongation factor                                                                                                       |
| Aput2177/CDS/CDS     | 4.7  | 1.0  | 21.2 | K | COG2865         | Predicted transcriptional regulator containing an HTH domain and an uncharacterized domain shared with the mammalian protein Schlafen |
| Msmi751317/CDS/CDS   | 1.1  | 0.3  | 20.0 | K | COG2101         | TATA-box binding protein (TBP), component of TFIID and TFIIB                                                                          |
| Casp1823/CDS/CDS     | 4.0  | 1.0  | 18.2 | K | COG0583         | Transcriptional regulator                                                                                                             |
| Cbol1615/CDS/CDS     | 4.0  | 1.0  | 18.2 | K | COG2186/COG1802 | Transcriptional regulators/Transcriptional regulators                                                                                 |
| TS29Bac05129/CDS/CDS | 36.0 | 9.0  | 18.2 | K | COG1595         | DNA-directed RNA polymerase specialized sigma subunit, sigma24 homolog                                                                |
| TS28Fae21805/CDS/CDS | 1.3  | 0.3  | 18.2 | K | COG0846         | NAD-dependent protein deacetylases, SIR2 family                                                                                       |
| Bxyl3927/CDS/CDS     | 4.6  | 1.2  | 18.0 | K | COG0568         | DNA-directed RNA polymerase, sigma subunit (sigma70/sigma32)                                                                          |
| Cbol2781/CDS/CDS     | 11.0 | 3.0  | 16.6 | K | COG2186         | Transcriptional regulators                                                                                                            |
| Rtor0295/CDS/CDS     | 3.5  | 1.0  | 15.9 | K | COG0250         | Transcription antiterminator                                                                                                          |
| TS29Par511/CDS/CDS   | 10.5 | 3.0  | 15.9 | K | COG0085         | DNA-directed RNA polymerase, beta subunit/140 kD subunit                                                                              |
| TS28Run08196/CDS/CDS | 3.5  | 1.0  | 15.9 | K | COG0250         | Transcription antiterminator                                                                                                          |
| Robe3026/CDS/CDS     | 8.5  | 2.5  | 15.4 | K | COG4465         | Pleiotropic transcriptional repressor                                                                                                 |
| Bova0739/CDS/CDS     | 6.3  | 2.0  | 14.2 | K | COG0202         | DNA-directed RNA polymerase, alpha subunit/40 kD subunit                                                                              |
| TS29Bac03346/CDS/CDS | 17.9 | 5.8  | 13.9 | K | COG0250         | Transcription antiterminator                                                                                                          |
| Bxyl1697/CDS/CDS     | 17.9 | 5.8  | 13.9 | K | COG0250         | Transcription antiterminator                                                                                                          |
| Bxyl1691/CDS/CDS     | 17.3 | 5.7  | 13.9 | K | COG0086         | DNA-directed RNA polymerase, beta' subunit/160 kD subunit                                                                             |
| TS29Run14790/CDS/CDS | 1.5  | 0.5  | 13.6 | K | COG0086         | DNA-directed RNA polymerase, beta' subunit/160 kD subunit                                                                             |
| TS29Clo3724/CDS/CDS  | 1.0  | 0.3  | 13.6 | K | COG0202         | DNA-directed RNA polymerase, alpha subunit/40 kD subunit                                                                              |
| Shisp9D90036/CDS/CDS | 3.0  | 1.0  | 13.6 | K | COG1309         | Transcriptional regulator                                                                                                             |
| Robe0356/CDS/CDS     | 3.0  | 1.0  | 13.6 | K | COG0557         | Exoribonuclease R                                                                                                                     |
| Hfil0357/CDS/CDS     | 6.0  | 2.0  | 13.6 | K | COG0557         | Exoribonuclease R                                                                                                                     |
| Cbol5958/CDS/CDS     | 3.0  | 1.0  | 13.6 | K | COG1609         | Transcriptional regulators                                                                                                            |
| Bthe3731478/CDS/CDS  | 3.0  | 1.0  | 13.6 | K | COG1595         | DNA-directed RNA polymerase specialized sigma subunit, sigma24 homolog                                                                |
| Acae3486/CDS/CDS     | 3.0  | 1.0  | 13.6 | K | COG3711/COG3933 | Transcriptional antiterminator/Transcriptional antiterminator                                                                         |
| Dlon2751/CDS/CDS     | 3.0  | 1.0  | 13.6 | K | COG1158         | Transcription termination factor                                                                                                      |
| TS28Dor2360/CDS/CDS  | 1.5  | 0.5  | 13.6 | K | COG0250         | Transcription antiterminator                                                                                                          |
| Casp4805/CDS/CDS     | 3.0  | 1.0  | 13.6 | K | COG2188         | Transcriptional regulators                                                                                                            |
| Dfor3178/CDS/CDS     | 3.0  | 1.0  | 13.6 | K | COG1316         | Transcriptional regulator                                                                                                             |
| TS28Run06224/CDS/CDS | 1.5  | 0.5  | 13.6 | K | COG0195         | Transcription elongation factor                                                                                                       |
| Dlon1156/CDS/CDS     | 1.5  | 0.5  | 13.6 | K | COG0250         | Transcription antiterminator                                                                                                          |
| TS28Clo03068/CDS/CDS | 12.0 | 4.0  | 13.6 | K | COG1420         | Transcriptional regulator of heat shock gene                                                                                          |
| TS28Clo01612/CDS/CDS | 3.0  | 1.0  | 13.6 | K | COG2183         | Transcriptional accessory protein                                                                                                     |
| TS28Bac5421/CDS/CDS  | 1.5  | 0.5  | 13.6 | K | COG1733         | Predicted transcriptional regulators                                                                                                  |
| TS28Ahi2077/CDS/CDS  | 3.0  | 1.0  | 13.6 | K | COG0202         | DNA-directed RNA polymerase, alpha subunit/40 kD subunit                                                                              |
| TS28Run14517/CDS/CDS | 18.0 | 6.0  | 13.6 | K | COG0195         | Transcription elongation factor                                                                                                       |
| TS29Bac07269/CDS/CDS | 21.6 | 7.5  | 13.1 | K | COG0568         | DNA-directed RNA polymerase, sigma subunit (sigma70/sigma32)                                                                          |
| Bthe7335410/CDS/CDS  | 3.5  | 1.3  | 12.7 | K | COG1158         | Transcription termination factor                                                                                                      |
| TS28Clo05718/CDS/CDS | 11.0 | 4.0  | 12.5 | K | COG0085         | DNA-directed RNA polymerase, beta subunit/140 kD subunit                                                                              |
| TS28Fae10763/CDS/CDS | 23.1 | 8.5  | 12.3 | K | COG1420         | Transcriptional regulator of heat shock gene                                                                                          |
| Bum0623/CDS/CDS      | 89.8 | 33.5 | 12.2 | K | COG0085         | DNA-directed RNA polymerase, beta subunit/140 kD subunit                                                                              |
| BactD13771/CDS/CDS   | 3.6  | 1.3  | 12.2 | K | COG0195         | Transcription elongation factor                                                                                                       |
| BactD13503/CDS/CDS   | 2.6  | 1.0  | 12.0 | K | COG2865         | Predicted transcriptional regulator containing an HTH domain and an uncharacterized domain shared with the mammalian protein Schlafen |
| Dfor1153/CDS/CDS     | 10.5 | 4.0  | 11.9 | K | COG0250         | Transcription antiterminator                                                                                                          |
| Aput1109/CDS/CDS     | 21.0 | 8.0  | 11.9 | K | COG0086         | DNA-directed RNA polymerase, beta' subunit/160 kD subunit                                                                             |
| TS28Fae17996/CDS/CDS | 2.6  | 1.0  | 11.7 | K | COG0195         | Transcription elongation factor                                                                                                       |
| Bege2652/CDS/CDS     | 15.3 | 6.0  | 11.5 | K | COG0250         | Transcription antiterminator                                                                                                          |
| FpraM2120253/CDS/CDS | 70.3 | 28.0 | 11.4 | K | COG0202         | DNA-directed RNA polymerase, alpha subunit/40 kD subunit                                                                              |
| TS28Fae08669/CDS/CDS | 2.5  | 1.0  | 11.3 | K | COG1609         | Transcriptional regulators                                                                                                            |
| TS28Fae18648/CDS/CDS | 2.5  | 1.0  | 11.3 | K | COG1396         | Predicted transcriptional regulators                                                                                                  |
| Cbol6589/CDS/CDS     | 5.0  | 2.0  | 11.3 | K | COG2186         | Transcriptional regulators                                                                                                            |
| TS29Bac04442/CDS/CDS | 5.0  | 2.0  | 11.3 | K | COG0789         | Predicted transcriptional regulators                                                                                                  |
| TS29Bac02015/CDS/CDS | 5.0  | 2.0  | 11.3 | K | COG1595         | DNA-directed RNA polymerase specialized sigma subunit, sigma24 homolog                                                                |
| Rtor0136/CDS/CDS     | 7.5  | 3.0  | 11.3 | K | COG1396         | Predicted transcriptional regulators                                                                                                  |
| Beac1758/CDS/CDS     | 1.2  | 0.5  | 11.3 | K | COG0568         | DNA-directed RNA polymerase, sigma subunit (sigma70/sigma32)                                                                          |
| Msmi741542/CDS/CDS   | 0.8  | 0.3  | 10.9 | K | COG1095         | DNA-directed RNA polymerase, subunit E'                                                                                               |
| Msmi750175/CDS/CDS   | 0.8  | 0.3  | 10.9 | K | COG1095         | DNA-directed RNA polymerase, subunit E'                                                                                               |
| TS28Met1211/CDS/CDS  | 0.6  | 0.3  | 10.9 | K | COG2101         | TATA-box binding protein (TBP), component of TFIID and TFIIB                                                                          |
| Bum3063/CDS/CDS      | 2.8  | 1.2  | 10.7 | K | COG1508         | DNA-directed RNA polymerase specialized sigma subunit, sigma54 homolog                                                                |
| BactD14444/CDS/CDS   | 15.2 | 6.5  | 10.6 | K | COG0085         | DNA-directed RNA polymerase, beta subunit/140 kD subunit                                                                              |
| TS28Eub0216/CDS/CDS  | 3.5  | 1.5  | 10.6 | K | COG0568         | DNA-directed RNA polymerase, sigma subunit (sigma70/sigma32)                                                                          |
| TS28Run00133/CDS/CDS | 34.5 | 15.0 | 10.4 | K | COG0202         | DNA-directed RNA polymerase, alpha subunit/40 kD subunit                                                                              |
| TS28Fae21836/CDS/CDS | 6.5  | 2.8  | 10.4 | K | COG2186/COG1802 | Transcriptional regulators/Transcriptional regulators                                                                                 |
| TS28Met0883/CDS/CDS  | 1.5  | 0.7  | 10.2 | K | COG0195         | Transcription elongation factor                                                                                                       |
| Msmi740887/CDS/CDS   | 1.5  | 0.7  | 10.2 | K | COG0195         | Transcription elongation factor                                                                                                       |
| Msmi750797/CDS/CDS   | 1.5  | 0.7  | 10.2 | K | COG0195         | Transcription elongation factor                                                                                                       |
| Clep0604/CDS/CDS     | 6.3  | 2.8  | 10.1 | K | COG0202         | DNA-directed RNA polymerase, alpha subunit/40 kD subunit                                                                              |
| Robe2662/CDS/CDS     | 0.3  | 12.2 | 0.1  | K | COG3655         | Predicted transcriptional regulator                                                                                                   |
| TS29Fae09850/CDS/CDS | 1.5  | 68.3 | 0.1  | K | COG2865         | Predicted transcriptional regulator containing an HTH domain and an uncharacterized domain shared with the mammalian protein Schlafen |
| TS29Fae04404/CDS/CDS | 1.0  | 46.0 | 0.1  | K | COG0195         | Transcription elongation factor                                                                                                       |
| TS29Col0092/CDS/CDS  | 0.5  | 23.0 | 0.1  | K | COG0782         | Transcription elongation factor                                                                                                       |
| TS29Fae06652/CDS/CDS | 0.5  | 23.0 | 0.1  | K | COG1475         | Predicted transcriptional regulators                                                                                                  |
| TS29Run19594/CDS/CDS | 1.0  | 48.0 | 0.1  | K | COG2207         | AraC-type DNA-binding domain-containing proteins                                                                                      |
| TS29Run00367/CDS/CDS | 1.0  | 48.0 | 0.1  | K | COG0583         | Transcriptional regulator                                                                                                             |
| Dfor0448/CDS/CDS     | 0.1  | 5.5  | 0.1  | K | COG0583         | Transcriptional regulator                                                                                                             |
| TS29Run16863/CDS/CDS | 0.5  | 25.0 | 0.1  | K | COG0454         | Histone acetyltransferase HPA2 and related acetyltransferases                                                                         |

|                        |      |       |      |         |                                                                                 |                                                                                                                                                                                                                                                                                                                      |
|------------------------|------|-------|------|---------|---------------------------------------------------------------------------------|----------------------------------------------------------------------------------------------------------------------------------------------------------------------------------------------------------------------------------------------------------------------------------------------------------------------|
| TS29Rum13581 CDS/CDS   | 0.5  | 28.0  | 0.1  | K       | COG0568 COG1191                                                                 | DNA-directed RNA polymerase, sigma subunit (sigma70/sigma32) DNA-directed RNA polymerase specialized sigma subunit                                                                                                                                                                                                   |
| TS29Rum01249 CDS/CDS   | 0.5  | 29.0  | 0.1  | K       | COG0454                                                                         | Histone acetyltransferase HPA2 and related acetyltransferases                                                                                                                                                                                                                                                        |
| TS28Bif4627 CDS/CDS    | 0.3  | 15.8  | 0.1  | K       | COG1316                                                                         | Transcriptional regulator                                                                                                                                                                                                                                                                                            |
| BactD12821 CDS/CDS     | 0.1  | 8.0   | 0.1  | K       | COG1521                                                                         | Putative transcriptional regulator, homolog of Bvg accessory factor                                                                                                                                                                                                                                                  |
| TS29Fae09975 CDS/CDS   | 0.5  | 33.5  | 0.1  | K       | COG1321                                                                         | Mn-dependent transcriptional regulator                                                                                                                                                                                                                                                                               |
| TS29Bif3502 CDS/CDS    | 2.2  | 149.3 | 0.1  | K       | COG0085                                                                         | DNA-directed RNA polymerase, beta subunit/140 kD subunit                                                                                                                                                                                                                                                             |
| TS29Bif3221 CDS/CDS    | 0.3  | 17.4  | 0.1  | K       | COG1316                                                                         | Transcriptional regulator                                                                                                                                                                                                                                                                                            |
| TS29Bif2544 CDS/CDS    | 0.7  | 48.4  | 0.1  | K       | COG0568                                                                         | DNA-directed RNA polymerase, sigma subunit (sigma70/sigma32)                                                                                                                                                                                                                                                         |
| TS28Bif4941 CDS/CDS    | 2.2  | 158.3 | 0.1  | K       | COG0085                                                                         | DNA-directed RNA polymerase, beta subunit/140 kD subunit                                                                                                                                                                                                                                                             |
| Bnse1724 CDS/CDS       | 0.3  | 24.5  | 0.1  | K       | COG0086                                                                         | DNA-directed RNA polymerase, beta' subunit/160 kD subunit                                                                                                                                                                                                                                                            |
| TS29Rum16786 CDS/CDS   | 0.5  | 37.5  | 0.1  | K       | COG1609                                                                         | Transcriptional regulators                                                                                                                                                                                                                                                                                           |
| TS29Bif3226 CDS/CDS    | 0.3  | 19.0  | 0.1  | K       | COG0782                                                                         | Transcription elongation factor                                                                                                                                                                                                                                                                                      |
| TS28Bif4632 CDS/CDS    | 0.3  | 19.0  | 0.1  | K       | COG0782                                                                         | Transcription elongation factor                                                                                                                                                                                                                                                                                      |
| TS29Rum20239 CDS/CDS   | 1.0  | 77.0  | 0.1  | K       | COG1293                                                                         | Predicted RNA-binding protein homologous to eukaryotic snRNP                                                                                                                                                                                                                                                         |
| Robe2731 CDS/CDS       | 0.1  | 9.8   | 0.1  | K       | COG0583                                                                         | Transcriptional regulator                                                                                                                                                                                                                                                                                            |
| TS29Rum13704 CDS/CDS   | 0.5  | 44.5  | 0.1  | K       | COG0583                                                                         | Transcriptional regulator                                                                                                                                                                                                                                                                                            |
| TS29Bif2367 CDS/CDS    | 0.8  | 72.3  | 0.0  | K       | COG1414                                                                         | Transcriptional regulator                                                                                                                                                                                                                                                                                            |
| TS29Bif3800 CDS/CDS    | 0.5  | 49.3  | 0.0  | K       | COG0202                                                                         | DNA-directed RNA polymerase, alpha subunit/40 kD subunit                                                                                                                                                                                                                                                             |
| Ehal2096 CDS/CDS       | 0.1  | 11.2  | 0.0  | K       | COG0583                                                                         | Transcriptional regulator                                                                                                                                                                                                                                                                                            |
| TS29Rum20808 CDS/CDS   | 0.5  | 52.0  | 0.0  | K       | COG4189                                                                         | Predicted transcriptional regulator                                                                                                                                                                                                                                                                                  |
| Dfor3096 CDS/CDS       | 0.3  | 28.0  | 0.0  | K       | COG3655                                                                         | Predicted transcriptional regulator                                                                                                                                                                                                                                                                                  |
| TS29Fae09118 CDS/CDS   | 0.5  | 54.5  | 0.0  | K       | COG2188                                                                         | Transcriptional regulators                                                                                                                                                                                                                                                                                           |
| TS28Bif0944 CDS/CDS    | 0.5  | 56.4  | 0.0  | K       | COG1414                                                                         | Transcriptional regulator                                                                                                                                                                                                                                                                                            |
| TS29Bif2366 CDS/CDS    | 0.5  | 56.4  | 0.0  | K       | COG1414                                                                         | Transcriptional regulator                                                                                                                                                                                                                                                                                            |
| TS29Bif0573 CDS/CDS    | 0.3  | 32.6  | 0.0  | K       | COG1609                                                                         | Transcriptional regulators                                                                                                                                                                                                                                                                                           |
| TS28Bif1207 CDS/CDS    | 0.3  | 32.6  | 0.0  | K       | COG1609                                                                         | Transcriptional regulators                                                                                                                                                                                                                                                                                           |
| Ccom0524 CDS/CDS       | 0.1  | 18.0  | 0.0  | K       | COG0583                                                                         | Transcriptional regulator                                                                                                                                                                                                                                                                                            |
| TS29Bif0465 CDS/CDS    | 0.5  | 82.5  | 0.0  | K       | COG1475                                                                         | Predicted transcriptional regulators                                                                                                                                                                                                                                                                                 |
| TS29Fae08964 CDS/CDS   | 0.3  | 55.0  | 0.0  | K       | COG2188                                                                         | Transcriptional regulators                                                                                                                                                                                                                                                                                           |
| TS28Bif1198 CDS/CDS    | 0.3  | 42.5  | 0.0  | K       | COG1609                                                                         | Transcriptional regulators                                                                                                                                                                                                                                                                                           |
| TS29Bif4136 CDS/CDS    | 0.3  | 43.2  | 0.0  | K       | COG1609                                                                         | Transcriptional regulators                                                                                                                                                                                                                                                                                           |
| TS28Bif5008 CDS/CDS    | 0.3  | 43.2  | 0.0  | K       | COG1609                                                                         | Transcriptional regulators                                                                                                                                                                                                                                                                                           |
| TS29Fae06037 CDS/CDS   | 0.5  | 87.5  | 0.0  | K       | COG1609                                                                         | Transcriptional regulators                                                                                                                                                                                                                                                                                           |
| TS29Rum11457 CDS/CDS   | 0.5  | 110.0 | 0.0  | K       | COG2909                                                                         | ATP-dependent transcriptional regulator                                                                                                                                                                                                                                                                              |
| TS29Rum11584 CDS/CDS   | 0.2  | 44.5  | 0.0  | K       | COG0846                                                                         | NAD-dependent protein deacetylases, SIR2 family                                                                                                                                                                                                                                                                      |
| TS29Bif0377 CDS/CDS    | 0.3  | 93.5  | 0.0  | K       | COG0086                                                                         | DNA-directed RNA polymerase, beta' subunit/160 kD subunit                                                                                                                                                                                                                                                            |
| TS29Bif0579 CDS/CDS    | 0.3  | 81.5  | 0.0  | K       | COG1609                                                                         | Transcriptional regulators                                                                                                                                                                                                                                                                                           |
| TS29Bif3615 CDS/CDS    | 0.3  | 104.3 | 0.0  | K       | COG1414                                                                         | Transcriptional regulator                                                                                                                                                                                                                                                                                            |
| Bun0316 CDS/CDS        | 9.7  | 1.0   | 44.2 | K/G     | COG1940                                                                         | Transcriptional regulator/sugar kinase                                                                                                                                                                                                                                                                               |
| BD11657 CDS ribokinase | 4.0  | 1.0   | 18.2 | K/G     | COG1609 COG0524 COG1349 COG2771                                                 | Transcriptional regulators Sugar kinases, ribokinase family Transcriptional regulators of sugar metabolism DNA-binding HTH domain-containing proteins                                                                                                                                                                |
| Cbol4822 CDS/CDS       | 15.0 | 4.0   | 17.0 | K/G     | COG2376 COG2390                                                                 | Dihydroxyacetone kinase Transcriptional regulator, contains sigma factor-related N-terminal domain                                                                                                                                                                                                                   |
| Rena0964 CDS/CDS       | 1.5  | 0.5   | 13.6 | K/G     | COG1349                                                                         | Transcriptional regulators of sugar metabolism                                                                                                                                                                                                                                                                       |
| Cbol2158 CDS/CDS       | 3.0  | 1.0   | 13.6 | K/G     | COG1940                                                                         | Transcriptional regulator/sugar kinase                                                                                                                                                                                                                                                                               |
| BactD21070 CDS/CDS     | 2.5  | 1.0   | 11.3 | K/G     | COG1940                                                                         | Transcriptional regulator/sugar kinase                                                                                                                                                                                                                                                                               |
| Robe3270 CDS/CDS       | 8.5  | 3.5   | 11.0 | K/G     | COG1349                                                                         | Transcriptional regulators of sugar metabolism                                                                                                                                                                                                                                                                       |
| Ehal1017 CDS/CDS       | 3.5  | 1.5   | 10.6 | K/G     | COG2376 COG2390                                                                 | Dihydroxyacetone kinase Transcriptional regulator, contains sigma factor-related N-terminal domain                                                                                                                                                                                                                   |
| TS28Clo6356 CDS/CDS    | 7.0  | 3.0   | 10.6 | K/H     | COG0340 COG1654                                                                 | Biotin-(acetyl-CoA carboxylase) ligase Biotin operon repressor                                                                                                                                                                                                                                                       |
| TS28Fae19466 CDS/CDS   | 0.5  | 52.0  | 0.0  | K/H     | COG0351 COG0352 COG1992 COG0819                                                 | Hydroxymethylpyrimidine/phosphomethylpyrimidine kinase Thiamine monophosphate synthase Uncharacterized conserved protein Putative transcription activator                                                                                                                                                            |
| TS29Bac11801 CDS/CDS   | 0.3  | 12.0  | 0.1  | K/J/L   | COG0513                                                                         | Superfamily II DNA and RNA helicases                                                                                                                                                                                                                                                                                 |
| Casp3410 CDS/CDS       | 3.0  | 1.0   | 13.6 | K/J/L   | COG0553 COG4279                                                                 | Superfamily II DNA/RNA helicases, SNF2 family Uncharacterized conserved protein                                                                                                                                                                                                                                      |
| TS28Clo4581 CDS/CDS    | 3.0  | 1.0   | 13.6 | K/J/L   | COG1595 COG2255                                                                 | DNA-directed RNA polymerase specialized sigma subunit, sigma24 homolog Holliday junction resolvosome, helicase subunit                                                                                                                                                                                               |
| TS28Met0885 CDS/CDS    | 1.8  | 0.7   | 11.9 | K/J/L   | COG0086 COG1372                                                                 | DNA-directed RNA polymerase, beta' subunit/160 kD subunit Intein/homing endonuclease                                                                                                                                                                                                                                 |
| TS29Bac10519 CDS/CDS   | 3.0  | 140.0 | 0.1  | K/L     | COG4646                                                                         | DNA methylase                                                                                                                                                                                                                                                                                                        |
| TS29Rum21230 CDS/CDS   | 1.0  | 46.7  | 0.1  | K/L     | COG4646                                                                         | DNA methylase                                                                                                                                                                                                                                                                                                        |
| Robe2639 CDS/CDS       | 3.0  | 144.5 | 0.1  | K/L     | COG4646                                                                         | DNA methylase                                                                                                                                                                                                                                                                                                        |
| FpraM2121389 CDS/CDS   | 3.0  | 145.0 | 0.1  | K/L     | COG4646                                                                         | DNA methylase                                                                                                                                                                                                                                                                                                        |
| TS29Fae03658 CDS/CDS   | 0.5  | 26.0  | 0.1  | K/L     | COG1200                                                                         | RecG-like helicase                                                                                                                                                                                                                                                                                                   |
| TS29Fae10411 CDS/CDS   | 3.0  | 159.5 | 0.1  | K/L     | COG4646                                                                         | DNA methylase                                                                                                                                                                                                                                                                                                        |
| TS29Bif3302 CDS/CDS    | 2.2  | 123.7 | 0.1  | K/L     | COG1197                                                                         | Transcription-repair coupling factor (superfamily II helicase)                                                                                                                                                                                                                                                       |
| TS28Bif4704 CDS/CDS    | 2.2  | 123.7 | 0.1  | K/L     | COG1197                                                                         | Transcription-repair coupling factor (superfamily II helicase)                                                                                                                                                                                                                                                       |
| TS28Eub6362 CDS/CDS    | 3.8  | 228.8 | 0.1  | K/L     | COG4646                                                                         | DNA methylase                                                                                                                                                                                                                                                                                                        |
| Dfor3055 CDS/CDS       | 6.5  | 397.9 | 0.1  | K/L     | COG4646                                                                         | DNA methylase                                                                                                                                                                                                                                                                                                        |
| TS29RumUnc1595 CDS/CDS | 2.0  | 135.0 | 0.1  | K/L     | COG1197                                                                         | Transcription-repair coupling factor (superfamily II helicase)                                                                                                                                                                                                                                                       |
| TS28Fae22501 CDS/CDS   | 1.0  | 72.0  | 0.1  | K/L     | COG4646                                                                         | DNA methylase                                                                                                                                                                                                                                                                                                        |
| TS29Rum11733 CDS/CDS   | 4.0  | 359.5 | 0.1  | K/L     | COG4646                                                                         | DNA methylase                                                                                                                                                                                                                                                                                                        |
| TS29Bif0823 CDS/CDS    | 0.9  | 92.5  | 0.0  | K/L     | COG1200                                                                         | RecG-like helicase                                                                                                                                                                                                                                                                                                   |
| Hfil2119 CDS/CDS       | 1.0  | 102.4 | 0.0  | K/L     | COG4646                                                                         | DNA methylase                                                                                                                                                                                                                                                                                                        |
| TS29Fae00379 CDS/CDS   | 1.0  | 139.0 | 0.0  | K/L     | COG1199                                                                         | Rad3-related DNA helicases                                                                                                                                                                                                                                                                                           |
| TS28Bif0462 CDS/CDS    | 0.5  | 70.8  | 0.0  | K/L     | COG1200                                                                         | RecG-like helicase                                                                                                                                                                                                                                                                                                   |
| Cnex1513 CDS/CDS       | 1.0  | 151.0 | 0.0  | K/L     | COG4646                                                                         | DNA methylase                                                                                                                                                                                                                                                                                                        |
| Ccom0363 CDS/CDS       | 0.3  | 51.7  | 0.0  | K/L     | COG4646                                                                         | DNA methylase                                                                                                                                                                                                                                                                                                        |
| TS29Dor2220 CDS/CDS    | 0.5  | 106.0 | 0.0  | K/J/L   | COG2176 COG1199                                                                 | DNA polymerase III, alpha subunit (gram-positive type) Rad3-related DNA helicases                                                                                                                                                                                                                                    |
| TS29Bif2118 CDS/CDS    | 0.3  | 81.8  | 0.0  | K/J/L   | COG0553 COG4279                                                                 | Superfamily II DNA/RNA helicases, SNF2 family Uncharacterized conserved protein                                                                                                                                                                                                                                      |
| TS28Rum06767 CDS/CDS   | 3.0  | 0.3   | 40.9 | K/L/T   | COG0515                                                                         | Serine/threonine protein kinase                                                                                                                                                                                                                                                                                      |
| TS28Rum01136 CDS/CDS   | 16.2 | 3.5   | 21.0 | K/J/L/T | COG0515 COG2815 COG5616 COG0631 COG2319 COG3899                                 | Serine/threonine protein kinase Uncharacterized protein conserved in bacteria Predicted integral membrane protein Serine/threonine protein phosphatase FOG: WD40 repeat Predicted ATPase                                                                                                                             |
| TS29Rum13694 CDS/CDS   | 1.0  | 90.0  | 0.1  | K/J/L/T | COG4886 COG4252 COG0515 COG2815 COG1357 COG0631 COG2319 COG3899 COG1716 COG5635 | Leucine-rich repeat (LRR) protein Predicted transmembrane sensor domain Serine/threonine protein kinase Uncharacterized protein conserved in bacteria Uncharacterized low-complexity proteins Serine/threonine protein phosphatase FOG: WD40 repeat Predicted ATPase FOG: FHA domain Predicted NTPase (NACHT family) |
| TS28Bif4495 CDS/CDS    | 0.8  | 69.5  | 0.0  | K/J/L/T | COG0515 COG2815 COG3899                                                         | Serine/threonine protein kinase Uncharacterized protein conserved in bacteria Predicted ATPase                                                                                                                                                                                                                       |

|                        |       |       |       |       |                                                         |                                                                                                                                                                                                                                                                        |
|------------------------|-------|-------|-------|-------|---------------------------------------------------------|------------------------------------------------------------------------------------------------------------------------------------------------------------------------------------------------------------------------------------------------------------------------|
| TS29Fae05647 CDS CDS   | 1.0   | 96.0  | 0.0   | K L T | COG0515 COG2815 COG3899                                 | Serine/threonine protein kinase Uncharacterized protein conserved in bacterial Predicted ATPase                                                                                                                                                                        |
| TS28Bif4494 CDS CDS    | 0.3   | 69.3  | 0.0   | K L T | COG3391 COG0515 COG2815 COG5616 COG3899                 | Uncharacterized conserved protein Serine/threonine protein kinase Uncharacterized protein conserved in bacterial Predicted integral membrane protein Predicted ATPase                                                                                                  |
| TS29Bif0525 CDS CDS    | 0.3   | 71.3  | 0.0   | K L T | COG0515 COG2815 COG3899                                 | Serine/threonine protein kinase Uncharacterized protein conserved in bacterial Predicted ATPase                                                                                                                                                                        |
| TS28Rum16414 CDS CDS   | 5.0   | 0.5   | 45.4  | K L V | COG4096 COG3886 COG1061                                 | Type I site-specific restriction-modification system, R (restriction) subunit and related helicases Predicted HKD family nuclease DNA or RNA helicases of superfamily II                                                                                               |
| TS28Eub7322 CDS CDS    | 0.5   | 24.0  | 0.1   | K L V | COG4096 COG3886 COG1061                                 | Type I site-specific restriction-modification system, R (restriction) subunit and related helicases Predicted HKD family nuclease DNA or RNA helicases of superfamily II                                                                                               |
| TS29Fae03478 CDS CDS   | 4.0   | 250.0 | 0.1   | K L V | COG4096 COG3886 COG1061                                 | Type I site-specific restriction-modification system, R (restriction) subunit and related helicases Predicted HKD family nuclease DNA or RNA helicases of superfamily II                                                                                               |
| TS29Rum20052 CDS CDS   | 0.5   | 61.0  | 0.0   | K L V | COG4096 COG3886 COG1061                                 | Type I site-specific restriction-modification system, R (restriction) subunit and related helicases Predicted HKD family nuclease DNA or RNA helicases of superfamily II                                                                                               |
| FpraM2121013 CDS CDS   | 4.3   | 1.0   | 19.7  | K M G | COG4464 COG1316                                         | Capsular polysaccharide biosynthesis protein Transcriptional regulator                                                                                                                                                                                                 |
| TS28Dor1748 CDS CDS    | 238.0 | 2.0   | 540.2 | K T   | COG0745                                                 | Response regulators consisting of a CheY-like receiver domain and a winged-helix DNA-binding domain                                                                                                                                                                    |
| TS28Rum01137 CDS CDS   | 11.0  | 0.5   | 99.9  | K T   | COG0789 COG0631                                         | Predicted transcriptional regulators Serine/threonine protein phosphatase                                                                                                                                                                                              |
| TS28Rum10489 CDS CDS   | 6.0   | 0.5   | 54.5  | K T   | COG0745                                                 | Response regulators consisting of a CheY-like receiver domain and a winged-helix DNA-binding domain                                                                                                                                                                    |
| TS28Fae03017 CDS CDS   | 9.0   | 1.0   | 40.9  | K T   | COG0745                                                 | Response regulators consisting of a CheY-like receiver domain and a winged-helix DNA-binding domain                                                                                                                                                                    |
| TS28Bif1322 CDS CDS    | 7.0   | 1.0   | 31.8  | K T   | COG0745                                                 | Response regulators consisting of a CheY-like receiver domain and a winged-helix DNA-binding domain                                                                                                                                                                    |
| TS28Fae10784 CDS CDS   | 40.0  | 7.0   | 25.9  | K T   | COG0745                                                 | Response regulators consisting of a CheY-like receiver domain and a winged-helix DNA-binding domain                                                                                                                                                                    |
| TS29Clo0809 CDS CDS    | 15.0  | 3.0   | 22.7  | K T   | COG0317                                                 | Guanosine polyphosphate pyrophosphohydrolases/synthetases                                                                                                                                                                                                              |
| TS28Fae14042 CDS CDS   | 11.5  | 2.3   | 22.4  | K T   | COG3604 COG4624                                         | Transcriptional regulator containing GAF, AAA-type ATPase, and DNA binding domains Iron only hydrogenase large subunit, C-terminal domain                                                                                                                              |
| TS29Rum07087 CDS CDS   | 10.0  | 3.0   | 15.1  | K T   | COG0745                                                 | Response regulators consisting of a CheY-like receiver domain and a winged-helix DNA-binding domain                                                                                                                                                                    |
| TS28RumUnc0141 CDS CDS | 3.0   | 1.0   | 13.6  | K T   | COG0745                                                 | Response regulators consisting of a CheY-like receiver domain and a winged-helix DNA-binding domain                                                                                                                                                                    |
| TS28Rum03656 CDS CDS   | 3.0   | 1.0   | 13.6  | K T   | COG0745                                                 | Response regulators consisting of a CheY-like receiver domain and a winged-helix DNA-binding domain                                                                                                                                                                    |
| TS28Col0012 CDS CDS    | 3.0   | 1.0   | 13.6  | K T   | COG0317                                                 | Guanosine polyphosphate pyrophosphohydrolases/synthetases                                                                                                                                                                                                              |
| TS28Eub0060 CDS CDS    | 3.0   | 1.0   | 13.6  | K T   | COG3604 COG5564                                         | Transcriptional regulator containing GAF, AAA-type ATPase, and DNA binding domains Predicted TIM-barrel enzyme, possibly a dioxygenase                                                                                                                                 |
| TS28Fae22647 CDS CDS   | 2.5   | 1.0   | 11.3  | K T   | COG4753 COG3279                                         | Response regulator containing CheY-like receiver domain and AraC-type DNA-binding domain Response regulator of the LysR/AlgR family                                                                                                                                    |
| TS28Rum12330 CDS CDS   | 20.0  | 8.0   | 11.3  | K T   | COG2770 COG4252 COG3437 COG2206                         | FOG: HAMP domain Predicted transmembrane sensor domain Response regulator containing a CheY-like receiver domain and an HD-GYP domain HD-GYP domain                                                                                                                    |
| TS28Fae21039 CDS CDS   | 21.5  | 9.0   | 10.8  | K T   | COG1974 COG2932                                         | SOS-response transcriptional repressors (RecA-mediated autophosphatases) Predicted transcriptional regulator                                                                                                                                                           |
| TS29Bac02534 CDS CDS   | 37.6  | 16.0  | 10.7  | K T   | COG0642 COG5002 COG2202 COG2770 COG2203 COG3437 COG2205 | Signal transduction histidine kinase Signal transduction histidine kinase FOG: PAS/PAC domain FOG: HAMP domain FOG: GAF domain Response regulator containing a CheY-like receiver domain and an HD-GYP domain Osmosensitive K <sup>+</sup> channel histidine kinase    |
| TS28Rum11325 CDS CDS   | 7.0   | 3.0   | 10.6  | K T   | COG0745 COG0784 COG3706 COG3707                         | Response regulators consisting of a CheY-like receiver domain and a winged-helix DNA-binding domain FOG: CheY-like receiver Response regulator containing a CheY-like receiver domain and a GGDEF domain Response regulator with putative antiterminator output domain |
| TS28Fae15090 CDS CDS   | 0.5   | 24.5  | 0.1   | K T   | COG0789 COG0631                                         | Predicted transcriptional regulators Serine/threonine protein phosphatase                                                                                                                                                                                              |
| TS29Rum20340 CDS CDS   | 1.0   | 50.0  | 0.1   | K T   | COG4753 COG2207 COG4977                                 | Response regulator containing CheY-like receiver domain and AraC-type DNA-binding domain AraC-type DNA-binding domain-containing proteins Transcriptional regulator containing an amidase domain and an AraC-type DNA-binding HTH domain                               |
| TS28Fae21327 CDS CDS   | 0.7   | 35.0  | 0.1   | K T   | COG3275 COG2972 COG4936 COG5012                         | Putative regulator of cell autolysis Predicted signal transduction protein with a C-terminal ATPase domain Predicted sensor domain Predicted cobalamin binding protein                                                                                                 |
| TS29Col1822 CDS CDS    | 1.5   | 80.0  | 0.1   | K T   | COG0317                                                 | Guanosine polyphosphate pyrophosphohydrolases/synthetases                                                                                                                                                                                                              |
| TS29Fae05517 CDS CDS   | 1.0   | 54.0  | 0.1   | K T   | COG4753 COG3279                                         | Response regulator containing CheY-like receiver domain and AraC-type DNA-binding domain Response regulator of the LysR/AlgR family                                                                                                                                    |
| TS28Rum01910 CDS CDS   | 0.3   | 14.0  | 0.1   | K T   | COG0317                                                 | Guanosine polyphosphate pyrophosphohydrolases/synthetases                                                                                                                                                                                                              |
| TS29Fae09631 CDS CDS   | 1.0   | 59.0  | 0.1   | K T   | COG4585 COG2197                                         | Signal transduction histidine kinase Response regulator containing a CheY-like receiver domain and an HTH DNA-binding domain                                                                                                                                           |
| TS29Fae08798 CDS CDS   | 0.3   | 21.0  | 0.1   | K T   | COG2770 COG4252 COG3437 COG2206                         | FOG: HAMP domain Predicted transmembrane sensor domain Response regulator containing a CheY-like receiver domain and an HD-GYP domain HD-GYP domain                                                                                                                    |
| TS28Rum13916 CDS CDS   | 1.0   | 64.0  | 0.1   | K T   | COG0745                                                 | Response regulators consisting of a CheY-like receiver domain and a winged-helix DNA-binding domain                                                                                                                                                                    |
| TS29Rum16916 CDS CDS   | 1.5   | 98.0  | 0.1   | K T   | COG3275 COG2972 COG4936 COG5012                         | Putative regulator of cell autolysis Predicted signal transduction protein with a C-terminal ATPase domain Predicted sensor domain Predicted cobalamin binding protein                                                                                                 |
| TS29Fae03363 CDS CDS   | 1.0   | 69.0  | 0.1   | K T   | COG3279                                                 | Response regulator of the LysR/AlgR family                                                                                                                                                                                                                             |
| TS29Rum16573 CDS CDS   | 1.0   | 70.0  | 0.1   | K T   | COG3275 COG2972 COG4936 COG5012                         | Putative regulator of cell autolysis Predicted signal transduction protein with a C-terminal ATPase domain Predicted sensor domain Predicted cobalamin binding protein                                                                                                 |
| TS29Rum00191 CDS CDS   | 0.5   | 37.0  | 0.1   | K T   | COG0745                                                 | Response regulators consisting of a CheY-like receiver domain and a winged-helix DNA-binding domain                                                                                                                                                                    |
| TS29Bif3212 CDS CDS    | 0.3   | 19.5  | 0.1   | K T   | COG0745                                                 | Response regulators consisting of a CheY-like receiver domain and a winged-helix DNA-binding domain                                                                                                                                                                    |
| TS29Rum00186 CDS CDS   | 0.3   | 24.0  | 0.1   | K T   | COG0745                                                 | Response regulators consisting of a CheY-like receiver domain and a winged-helix DNA-binding domain                                                                                                                                                                    |
| TS29Rum16549 CDS CDS   | 1.0   | 86.0  | 0.1   | K T   | COG3275 COG2972 COG4936 COG5012                         | Putative regulator of cell autolysis Predicted signal transduction protein with a C-terminal ATPase domain Predicted sensor domain Predicted cobalamin binding protein                                                                                                 |

|                      |       |       |       |     |                                 |                                                                                                                                                                                                                                                                  |
|----------------------|-------|-------|-------|-----|---------------------------------|------------------------------------------------------------------------------------------------------------------------------------------------------------------------------------------------------------------------------------------------------------------|
| TS29Bac05460 CDS CDS | 0.3   | 29.5  | 0.1   | K T | COG3275 COG2972 COG4936 COG5012 | Putative regulator of cell autolysis Predicted signal transduction protein with a C-terminal ATPase domain Predicted sensor domain Predicted cobalamin binding protein                                                                                           |
| TS29Fae05594 CDS CDS | 1.0   | 114.5 | 0.0   | K T | COG0317                         | Guanosine polyphosphate pyrophosphohydrolases/synthetases                                                                                                                                                                                                        |
| TS29Fae10051 CDS CDS | 1.0   | 117.0 | 0.0   | K T | COG4753 COG2207 COG4936 COG4977 | Response regulator containing CheY-like receiver domain and AraC-type DNA-binding domain AraC-type DNA-binding domain-containing proteins Predicted sensor domain Transcriptional regulator containing an amidase domain and an AraC-type DNA-binding HTH domain |
| TS29Fae06785 CDS CDS | 0.7   | 91.0  | 0.0   | K T | COG3275 COG2972 COG4936 COG5012 | Putative regulator of cell autolysis Predicted signal transduction protein with a C-terminal ATPase domain Predicted sensor domain Predicted cobalamin binding protein                                                                                           |
| TS29Fae07228 CDS CDS | 1.0   | 141.0 | 0.0   | K T | COG3275 COG2972 COG4936         | Putative regulator of cell autolysis Predicted signal transduction protein with a C-terminal ATPase domain Predicted sensor domain                                                                                                                               |
| TS29Col0151 CDS CDS  | 0.5   | 77.0  | 0.0   | K T | COG2770 COG4252 COG3437 COG2206 | FOG: HAMP domain Predicted transmembrane sensor domain Response regulator containing a CheY-like receiver domain and an HD-GYP domain HD-GYP domain                                                                                                              |
| TS29Fae07402 CDS CDS | 197.0 | 6.0   | 149.1 | L   | COG0350                         | Methylated DNA-protein cysteine methyltransferase                                                                                                                                                                                                                |
| TS28Fae15389 CDS CDS | 42.8  | 1.5   | 129.4 | L   | COG0776                         | Bacterial nucleoid DNA-binding protein                                                                                                                                                                                                                           |
| Caer1102 CDS CDS     | 5.5   | 0.3   | 74.9  | L   | COG3547                         | Transposase and inactivated derivatives                                                                                                                                                                                                                          |
| TS28Fae02025 CDS CDS | 23.5  | 1.5   | 71.1  | L   | COG0776                         | Bacterial nucleoid DNA-binding protein                                                                                                                                                                                                                           |
| Bple2878 CDS CDS     | 10.1  | 0.7   | 68.7  | L   | COG4974 COG0582                 | Site-specific recombinase XerD Integrase                                                                                                                                                                                                                         |
| Bthe7331652 CDS CDS  | 5.9   | 0.5   | 53.7  | L   | COG3436                         | Transposase and inactivated derivatives                                                                                                                                                                                                                          |
| TS28Col0361 CDS CDS  | 11.0  | 1.0   | 49.9  | L   | COG0497                         | ATPase involved in DNA repair                                                                                                                                                                                                                                    |
| TS29Bac08102 CDS CDS | 41.0  | 4.0   | 46.5  | L   | COG0776                         | Bacterial nucleoid DNA-binding protein                                                                                                                                                                                                                           |
| ShiespD91210 CDS CDS | 5.0   | 0.5   | 45.4  | L   | COG0178                         | Excinuclease ATPase subunit                                                                                                                                                                                                                                      |
| TS28Col09221 CDS CDS | 47.7  | 5.0   | 43.3  | L   | COG2812                         | DNA polymerase III, gamma/tau subunits                                                                                                                                                                                                                           |
| TS28Rum14944 CDS CDS | 9.5   | 1.0   | 43.1  | L   | COG0272                         | NAD-dependent DNA ligase (contains BRCT domain type II)                                                                                                                                                                                                          |
| TS28Col0370 CDS CDS  | 8.0   | 1.0   | 36.3  | L   | COG0270                         | Site-specific DNA methylase                                                                                                                                                                                                                                      |
| Brvfor0301 CDS CDS   | 12.0  | 1.5   | 36.3  | L   | COG1961                         | Site-specific recombinases, DNA invertase Pin homologs                                                                                                                                                                                                           |
| Bthe7335644 CDS CDS  | 2.3   | 0.3   | 31.8  | L   | COG0187                         | Type IIA topoisomerase (DNA gyrase/topo II, topoisomerase IV), B subunit                                                                                                                                                                                         |
| Bac1992 CDS CDS      | 3.5   | 0.5   | 31.8  | L   | COG4974 COG0582 COG4973         | Site-specific recombinase XerD Integrase Site-specific recombinase XerC                                                                                                                                                                                          |
| TS29Bac09910 CDS CDS | 2.3   | 0.3   | 30.6  | L   | COG0776                         | Bacterial nucleoid DNA-binding protein                                                                                                                                                                                                                           |
| TS28Rum15890 CDS CDS | 6.5   | 1.0   | 29.5  | L   | COG0629                         | Single-stranded DNA-binding protein                                                                                                                                                                                                                              |
| BactD20034 CDS CDS   | 13.0  | 2.0   | 29.4  | L   | COG4974 COG0582 COG4973         | Site-specific recombinase XerD Integrase Site-specific recombinase XerC                                                                                                                                                                                          |
| TS28Bac4655 CDS CDS  | 5.3   | 0.8   | 29.1  | L   | COG0497                         | ATPase involved in DNA repair                                                                                                                                                                                                                                    |
| TS29Bac11232 CDS CDS | 7.3   | 1.2   | 28.5  | L   | COG4974 COG0582                 | Site-specific recombinase XerD Integrase                                                                                                                                                                                                                         |
| Bova0241 CDS CDS     | 6.2   | 1.0   | 28.1  | L   | COG0514                         | Superfamily II DNA helicase                                                                                                                                                                                                                                      |
| TS29Par798 CDS CDS   | 3.0   | 0.5   | 27.2  | L   | COG1372 COG0468                 | Intein/homing endonuclease RecA/RadA recombinase                                                                                                                                                                                                                 |
| Msm1751024 CDS CDS   | 1.2   | 0.2   | 27.2  | L   | COG0592                         | DNA polymerase sliding clamp subunit (PCNA homolog)                                                                                                                                                                                                              |
| TS28Col05057 CDS CDS | 6.0   | 1.0   | 27.2  | L   | COG0305                         | Replicative DNA helicase                                                                                                                                                                                                                                         |
| Acod0610 CDS CDS     | 6.0   | 1.0   | 27.2  | L   | COG1643                         | HrpA-like helicases                                                                                                                                                                                                                                              |
| Cmit1568 CDS CDS     | 11.0  | 2.0   | 25.0  | L   | COG3547                         | Transposase and inactivated derivatives                                                                                                                                                                                                                          |
| Even0454 CDS CDS     | 1.8   | 0.3   | 25.0  | L   | COG1961                         | Site-specific recombinases, DNA invertase Pin homologs                                                                                                                                                                                                           |
| TS29Rum01721 CDS CDS | 0.670 | 5.0   | 24.5  | L   | COG0629                         | Single-stranded DNA-binding protein                                                                                                                                                                                                                              |
| Bthe7335545 CDS CDS  | 7.8   | 1.5   | 23.5  | L   | COG0116 COG1092                 | Predicted N6-adenine-specific DNA methylase Predicted SAM-dependent methyltransferases                                                                                                                                                                           |
| Bova3913 CDS CDS     | 2.5   | 0.5   | 22.7  | L   | COG3344                         | Retron-type reverse transcriptase                                                                                                                                                                                                                                |
| BactD2194 CDS CDS    | 2.5   | 0.5   | 22.7  | L   | COG3344                         | Retron-type reverse transcriptase                                                                                                                                                                                                                                |
| TS29Bac06951 CDS CDS | 5.0   | 1.0   | 22.7  | L   | COG3449                         | DNA gyrase inhibitor                                                                                                                                                                                                                                             |
| TS28Fae16374 CDS CDS | 10.0  | 2.0   | 22.7  | L   | COG0419                         | ATPase involved in DNA repair                                                                                                                                                                                                                                    |
| TS28Bac2303 CDS CDS  | 3.3   | 0.7   | 22.7  | L   | COG0494                         | NTP pyrophosphohydrolases including oxidative damage repair enzymes                                                                                                                                                                                              |
| TS28Bac2095 CDS CDS  | 1.7   | 0.3   | 22.7  | L   | COG1573                         | Uracil-DNA glycosylase                                                                                                                                                                                                                                           |
| Bum0980 CDS CDS      | 1.7   | 0.3   | 22.7  | L   | COG1573                         | Uracil-DNA glycosylase                                                                                                                                                                                                                                           |
| Bxyl1700 CDS CDS     | 9.4   | 2.0   | 21.4  | L   | COG4974                         | Site-specific recombinase XerD                                                                                                                                                                                                                                   |
| Bun13576 CDS CDS     | 4.5   | 1.0   | 20.4  | L   | COG0468                         | RecA/RadA recombinase                                                                                                                                                                                                                                            |
| TS28Rum05048 CDS CDS | 4.5   | 1.0   | 20.4  | L   | COG3344 COG1518 COG1468         | Retron-type reverse transcriptase Uncharacterized protein predicted to be involved in DNA repair RecB family exonuclease                                                                                                                                         |
| Aput0978 CDS CDS     | 9.0   | 2.0   | 20.4  | L   | COG0323                         | DNA mismatch repair enzyme (predicted ATPase)                                                                                                                                                                                                                    |
| Bxyl1701 CDS CDS     | 4.3   | 1.0   | 19.4  | L   | COG4974 COG0582 COG4973         | Site-specific recombinase XerD Integrase Site-specific recombinase XerC                                                                                                                                                                                          |
| Bun10861 CDS CDS     | 8.5   | 2.0   | 19.3  | L   | COG0494                         | NTP pyrophosphohydrolases including oxidative damage repair enzymes                                                                                                                                                                                              |
| CspSS20429 CDS CDS   | 2.0   | 0.5   | 18.2  | L   | COG0675                         | Transposase and inactivated derivatives                                                                                                                                                                                                                          |
| Bfra31120412 CDS CDS | 4.0   | 1.0   | 18.2  | L   | COG0514                         | Superfamily II DNA helicase                                                                                                                                                                                                                                      |
| Caer0012 CDS CDS     | 2.0   | 0.5   | 18.2  | L   | COG0593                         | ATPase involved in DNA replication initiation                                                                                                                                                                                                                    |
| ShiespD92610 CDS CDS | 2.0   | 0.5   | 18.2  | L   | COG2255                         | Holliday junction resolvosome, helicase subunit                                                                                                                                                                                                                  |
| TS29Bac11451 CDS CDS | 52.5  | 14.0  | 17.0  | L   | COG4974 COG0582 COG4973         | Site-specific recombinase XerD Integrase Site-specific recombinase XerC                                                                                                                                                                                          |
| BactD10140 CDS CDS   | 5.6   | 1.5   | 16.9  | L   | COG3436                         | Transposase and inactivated derivatives                                                                                                                                                                                                                          |
| Aput0249 CDS CDS     | 5.5   | 1.5   | 16.6  | L   | COG0272                         | NAD-dependent DNA ligase (contains BRCT domain type II)                                                                                                                                                                                                          |
| Bun11782 CDS CDS     | 1.8   | 0.5   | 16.6  | L   | COG0708                         | Exonuclease III                                                                                                                                                                                                                                                  |
| Bxyl2519 CDS CDS     | 5.3   | 1.5   | 16.1  | L   | COG0187                         | Type IIA topoisomerase (DNA gyrase/topo II, topoisomerase IV), B subunit                                                                                                                                                                                         |
| TS29Bac11452 CDS CDS | 24.0  | 7.0   | 15.6  | L   | COG4974                         | Site-specific recombinase XerD                                                                                                                                                                                                                                   |
| Bun13017 CDS CDS     | 13.6  | 4.0   | 15.5  | L   | COG0187                         | Type IIA topoisomerase (DNA gyrase/topo II, topoisomerase IV), B subunit                                                                                                                                                                                         |
| Bxyl4353 CDS CDS     | 1.1   | 0.3   | 15.4  | L   | COG0323                         | DNA mismatch repair enzyme (predicted ATPase)                                                                                                                                                                                                                    |
| Bpse1603 CDS CDS     | 3.3   | 1.0   | 15.1  | L   | COG4974 COG4973                 | Site-specific recombinase XerD Site-specific recombinase XerC                                                                                                                                                                                                    |
| TS29Bac03350 CDS CDS | 13.1  | 4.0   | 14.8  | L   | COG4974                         | Site-specific recombinase XerD                                                                                                                                                                                                                                   |
| Bun12885 CDS CDS     | 4.3   | 1.3   | 14.8  | L   | COG0587                         | DNA polymerase III, alpha subunit                                                                                                                                                                                                                                |
| TS28Rum00945 CDS CDS | 6.5   | 2.0   | 14.8  | L   | COG2812                         | DNA polymerase III, gamma/tau subunits                                                                                                                                                                                                                           |
| TS28Bac4342 CDS CDS  | 2.0   | 0.7   | 13.6  | L   | COG0323                         | DNA mismatch repair enzyme (predicted ATPase)                                                                                                                                                                                                                    |
| BactD13464 CDS CDS   | 1.0   | 0.3   | 13.6  | L   | COG1074                         | ATP-dependent exoDNase (exonuclease V) beta subunit (contains helicase and exonuclease domains)                                                                                                                                                                  |
| TS29Rum03743 CDS CDS | 1.0   | 0.3   | 13.6  | L   | COG0177                         | Predicted EndoIII-related endonuclease                                                                                                                                                                                                                           |
| TS28Bac2186 CDS CDS  | 1.0   | 0.3   | 13.6  | L   | COG0178                         | Excinuclease ATPase subunit                                                                                                                                                                                                                                      |
| Bun10443 CDS CDS     | 1.0   | 0.3   | 13.6  | L   | COG0556                         | Helicase subunit of the DNA excision repair complex                                                                                                                                                                                                              |
| BactD12341 CDS CDS   | 1.0   | 0.3   | 13.6  | L   | COG0497                         | ATPase involved in DNA repair                                                                                                                                                                                                                                    |
| Bun10436 CDS CDS     | 1.0   | 0.3   | 13.6  | L   | COG0178                         | Excinuclease ATPase subunit                                                                                                                                                                                                                                      |
| TS28Rum05868 CDS CDS | 1.0   | 0.3   | 13.6  | L   | COG0177                         | Predicted EndoIII-related endonuclease                                                                                                                                                                                                                           |
| Bun13546 CDS CDS     | 1.5   | 0.5   | 13.6  | L   | COG0249 COG1193                 | Mismatch repair ATPase (MutS family) Mismatch repair ATPase (MutS family)                                                                                                                                                                                        |
| CspM6211169 CDS CDS  | 3.0   | 1.0   | 13.6  | L   | COG0187                         | Type IIA topoisomerase (DNA gyrase/topo II, topoisomerase IV), B subunit                                                                                                                                                                                         |
| TS29Bac08566 CDS CDS | 3.0   | 1.0   | 13.6  | L   | COG0816                         | Predicted endonuclease involved in recombination (possible Holliday junction resolvase in Mycoplasmas and B. subtilis)                                                                                                                                           |
| Csp10976 CDS CDS     | 3.0   | 1.0   | 13.6  | L   | COG2801                         | Transposase and inactivated derivatives                                                                                                                                                                                                                          |
| Dlon2379 CDS CDS     | 1.5   | 0.5   | 13.6  | L   | COG0358                         | DNA primase (bacterial type)                                                                                                                                                                                                                                     |



|                        |      |       |      |   |                                 |                                                                                                                                                                                                             |
|------------------------|------|-------|------|---|---------------------------------|-------------------------------------------------------------------------------------------------------------------------------------------------------------------------------------------------------------|
| Aput0305/CDS/CDS       | 3.0  | 1.0   | 13.6 | L | COG0178                         | Excinuclease ATPase subunit                                                                                                                                                                                 |
| CspSS20428/CDS/CDS     | 3.0  | 1.0   | 13.6 | L | COG1943                         | Transposase and inactivated derivatives                                                                                                                                                                     |
| TS28EntUnc069/CDS/CDS  | 3.0  | 1.0   | 13.6 | L | COG0629                         | Single-stranded DNA-binding protein                                                                                                                                                                         |
| Acol2493/CDS/CDS       | 3.0  | 1.0   | 13.6 | L | COG0249                         | Mismatch repair ATPase (MutS family)                                                                                                                                                                        |
| RintL11896/CDS/CDS     | 3.0  | 1.0   | 13.6 | L | COG0468                         | RecA/RadA recombinase                                                                                                                                                                                       |
| RintL13053/CDS/CDS     | 3.0  | 1.0   | 13.6 | L | COG3663                         | G:T/U mismatch-specific DNA glycosylase                                                                                                                                                                     |
| Bthe3734439/CDS/CDS    | 5.9  | 2.0   | 13.4 | L | COG3436                         | Transposase and inactivated derivatives                                                                                                                                                                     |
| TS29Bac10352/CDS/CDS   | 3.0  | 1.0   | 13.4 | L | COG1372 COG0187                 | Intein/homing endonuclease Type IIA topoisomerase (DNA gyrase/topo II, topoisomerase IV), B subunit                                                                                                         |
| Bun13407/CDS/CDS       | 5.3  | 1.8   | 13.2 | L | COG0497                         | ATPase involved in DNA repair                                                                                                                                                                               |
| Bxyl3451/CDS/CDS       | 5.8  | 2.0   | 13.1 | L | COG0514                         | Superfamily II DNA helicase                                                                                                                                                                                 |
| ShiispD90986/CDS/CDS   | 2.8  | 1.0   | 12.9 | L | COG2812                         | DNA polymerase III, gamma/tau subunits                                                                                                                                                                      |
| TS29RumUnc1254/CDS/CDS | 66.0 | 23.5  | 12.8 | L | COG0629                         | Single-stranded DNA-binding protein                                                                                                                                                                         |
| Bxyl3976/CDS/CDS       | 4.2  | 1.5   | 12.7 | L | COG0592                         | DNA polymerase sliding clamp subunit (PCNA homolog)                                                                                                                                                         |
| Bxyl2046/CDS/CDS       | 2.2  | 0.8   | 12.5 | L | COG0249                         | Mismatch repair ATPase (MutS family)                                                                                                                                                                        |
| TS28Met1400/CDS/CDS    | 1.2  | 0.5   | 12.1 | L | COG0592                         | DNA polymerase sliding clamp subunit (PCNA homolog)                                                                                                                                                         |
| Msmi740652/CDS/CDS     | 1.2  | 0.5   | 12.1 | L | COG0592                         | DNA polymerase sliding clamp subunit (PCNA homolog)                                                                                                                                                         |
| Caer0878/CDS/CDS       | 1.3  | 0.5   | 12.1 | L | COG0188                         | Type IIA topoisomerase (DNA gyrase/topo II, topoisomerase IV), A subunit                                                                                                                                    |
| Cnex3141/CDS/CDS       | 1.8  | 0.7   | 11.9 | L | COG3335                         | Transposase and inactivated derivatives                                                                                                                                                                     |
| Bthe3732898/CDS/CDS    | 1.7  | 0.7   | 11.8 | L | COG4974 COG0582                 | Site-specific recombinase XerD Integrase                                                                                                                                                                    |
| Bxyl0421/CDS/CDS       | 3.8  | 1.5   | 11.4 | L | COG0188                         | Type IIA topoisomerase (DNA gyrase/topo II, topoisomerase IV), A subunit                                                                                                                                    |
| Msmi740593/CDS/CDS     | 1.3  | 0.5   | 11.3 | L | COG0608                         | Single-stranded DNA-specific exonuclease                                                                                                                                                                    |
| Cbol5308/CDS/CDS       | 5.0  | 2.0   | 11.3 | L | COG0514                         | Superfamily II DNA helicase                                                                                                                                                                                 |
| TS29Fae02317/CDS/CDS   | 5.0  | 2.0   | 11.3 | L | COG0749                         | DNA polymerase I - 3'-5' exonuclease and polymerase domains                                                                                                                                                 |
| TS28Rum03483/CDS/CDS   | 2.5  | 1.0   | 11.3 | L | COG0749                         | DNA polymerase I - 3'-5' exonuclease and polymerase domains                                                                                                                                                 |
| Eeli2670/CDS/CDS       | 0.3  | 0.1   | 11.3 | L | COG1533                         | DNA repair photolyase                                                                                                                                                                                       |
| Bxy10247/CDS/CDS       | 3.7  | 1.5   | 11.1 | L | COG0514 COG0507                 | Superfamily II DNA helicase ATP-dependent exoDNase (exonuclease V), alpha subunit - helicase superfamily I member                                                                                           |
| Rlac0757/CDS/CDS       | 1.5  | 0.6   | 11.0 | L | COG1533                         | DNA repair photolyase                                                                                                                                                                                       |
| TS28Fae10273/CDS/CDS   | 14.5 | 6.0   | 11.0 | L | COG0629                         | Single-stranded DNA-binding protein                                                                                                                                                                         |
| Dlon0415/CDS/CDS       | 2.0  | 0.8   | 10.9 | L | COG2255                         | Holliday junction resolvase, helicase subunit                                                                                                                                                               |
| TS29Bac01275/CDS/CDS   | 38.3 | 16.0  | 10.9 | L | COG0514                         | Superfamily II DNA helicase                                                                                                                                                                                 |
| Aput0457/CDS/CDS       | 19.0 | 8.0   | 10.8 | L | COG1198                         | Primosomal protein N' (replication factor Y) - superfamily II helicase                                                                                                                                      |
| Bfin0523/CDS/CDS       | 1.2  | 0.5   | 10.6 | L | COG4974 COG0582                 | Site-specific recombinase XerD Integrase                                                                                                                                                                    |
| TS28Bac5038/CDS/CDS    | 2.3  | 1.0   | 10.6 | L | COG0514                         | Superfamily II DNA helicase                                                                                                                                                                                 |
| Csci2796/CDS/CDS       | 2.3  | 1.0   | 10.6 | L | COG0210                         | Superfamily I DNA and RNA helicases                                                                                                                                                                         |
| TS28Rum16265/CDS/CDS   | 4.5  | 2.0   | 10.2 | L | COG2176                         | DNA polymerase III, alpha subunit (gram-positive type)                                                                                                                                                      |
| Bxyl3883/CDS/CDS       | 3.3  | 1.5   | 10.1 | L | COG0419                         | ATPase involved in DNA repair                                                                                                                                                                               |
| TS29Fae05603/CDS/CDS   | 25.5 | 11.5  | 10.1 | L | COG0776                         | Bacterial nucleoid DNA-binding protein                                                                                                                                                                      |
| TS29Rum20668/CDS/CDS   | 0.5  | 23.0  | 0.1  | L | COG0353                         | Recombinational DNA repair protein (RecF pathway)                                                                                                                                                           |
| Rtor1856/CDS/CDS       | 0.3  | 15.4  | 0.1  | L | COG2801                         | Transposase and inactivated derivatives                                                                                                                                                                     |
| Msmi741062/CDS/CDS     | 0.3  | 11.7  | 0.1  | L | COG0551 COG0210 COG1599         | Zn-finger domain associated with topoisomerase type I Superfamily I DNA and RNA helicases Single-stranded DNA-binding replication protein A (RPA), large (70 kD) subunit and related ssDNA-binding proteins |
| TS29Bac00474/CDS/CDS   | 0.5  | 23.5  | 0.1  | L | COG4974 COG0582 COG4973         | Site-specific recombinase XerD Integrase Site-specific recombinase XerC                                                                                                                                     |
| BactD10695/CDS/CDS     | 0.5  | 23.5  | 0.1  | L | COG4974 COG0582 COG4973         | Site-specific recombinase XerD Integrase Site-specific recombinase XerC                                                                                                                                     |
| TS29Fae09842/CDS/CDS   | 2.0  | 94.5  | 0.1  | L | COG0358                         | DNA primase (bacterial type)                                                                                                                                                                                |
| TS28Rum15978/CDS/CDS   | 0.6  | 27.8  | 0.1  | L | COG1961                         | Site-specific recombinases, DNA invertase Pin homologs                                                                                                                                                      |
| FpraM2121415/CDS/CDS   | 0.3  | 15.0  | 0.1  | L | COG0507                         | ATP-dependent exoDNase (exonuclease V), alpha subunit - helicase superfamily I member                                                                                                                       |
| TS29Rum13416/CDS/CDS   | 0.5  | 24.0  | 0.1  | L | COG0350 COG2315 COG3695 COG1515 | Methylated DNA-protein cysteine methyltransferase Uncharacterized protein conserved in bacterial Predicted methylated DNA-protein cysteine methyltransferase Deoxynovosine 3'endonuclease (endonuclease V)  |
| FpraM2121445/CDS/CDS   | 2.0  | 96.0  | 0.1  | L | COG1961                         | Site-specific recombinases, DNA invertase Pin homologs                                                                                                                                                      |
| TS28Fae00292/CDS/CDS   | 0.5  | 24.0  | 0.1  | L | COG0817                         | Holliday junction resolvase, endonuclease subunit                                                                                                                                                           |
| TS29Bac11814/CDS/CDS   | 0.2  | 8.1   | 0.1  | L | COG4974 COG0582                 | Site-specific recombinase XerD Integrase                                                                                                                                                                    |
| TS29Rum11531/CDS/CDS   | 1.0  | 48.5  | 0.1  | L | COG0389                         | Nucleotidyltransferase/DNA polymerase involved in DNA repair                                                                                                                                                |
| TS29Fae01387/CDS/CDS   | 2.2  | 107.0 | 0.1  | L | COG0389                         | Nucleotidyltransferase/DNA polymerase involved in DNA repair                                                                                                                                                |
| TS29Fae03922/CDS/CDS   | 0.7  | 32.5  | 0.1  | L | COG0272                         | NAD-dependent DNA ligase (contains BRCT domain type II)                                                                                                                                                     |
| TS29Fae06170/CDS/CDS   | 2.3  | 114.0 | 0.1  | L | COG1961                         | Site-specific recombinases, DNA invertase Pin homologs                                                                                                                                                      |
| Com1150/CDS/CDS        | 1.0  | 49.0  | 0.1  | L | COG3666                         | Transposase and inactivated derivatives                                                                                                                                                                     |
| TS29Bif1093/CDS/CDS    | 1.0  | 49.0  | 0.1  | L | COG4974 COG0582 COG4973         | Site-specific recombinase XerD Integrase Site-specific recombinase XerC                                                                                                                                     |
| TS29Rum19564/CDS/CDS   | 0.6  | 29.5  | 0.1  | L | COG1961                         | Site-specific recombinases, DNA invertase Pin homologs                                                                                                                                                      |
| TS29Rum11913/CDS/CDS   | 1.0  | 51.0  | 0.1  | L | COG3547                         | Transposase and inactivated derivatives                                                                                                                                                                     |
| TS29Rum18395/CDS/CDS   | 1.0  | 51.0  | 0.1  | L | COG3344                         | Retron-type reverse transcriptase                                                                                                                                                                           |
| TS29Fae07024/CDS/CDS   | 1.5  | 77.5  | 0.1  | L | COG0270                         | Site-specific DNA methylase                                                                                                                                                                                 |
| CspSS21647/CDS/CDS     | 0.2  | 8.7   | 0.1  | L | COG0582                         | Integrase                                                                                                                                                                                                   |
| CspSS21128/CDS/CDS     | 0.1  | 4.3   | 0.1  | L | COG3344                         | Retron-type reverse transcriptase                                                                                                                                                                           |
| TS28Rum01606/CDS/CDS   | 0.3  | 13.0  | 0.1  | L | COG1961                         | Site-specific recombinases, DNA invertase Pin homologs                                                                                                                                                      |
| TS29Rum19153/CDS/CDS   | 0.3  | 13.0  | 0.1  | L | COG1961                         | Site-specific recombinases, DNA invertase Pin homologs                                                                                                                                                      |
| TS29Bac11684/CDS/CDS   | 0.3  | 17.3  | 0.1  | L | COG0249                         | Mismatch repair ATPase (MutS family)                                                                                                                                                                        |
| TS29Rum15532/CDS/CDS   | 1.0  | 53.0  | 0.1  | L | COG0507                         | ATP-dependent exoDNase (exonuclease V), alpha subunit - helicase superfamily I member                                                                                                                       |
| TS29Rum20776/CDS/CDS   | 1.0  | 53.0  | 0.1  | L | COG0177                         | Predicted EndoIII-related endonuclease                                                                                                                                                                      |
| TS29Rum00845/CDS/CDS   | 2.0  | 107.0 | 0.1  | L | COG0322                         | Nuclease subunit of the excinuclease complex                                                                                                                                                                |
| TS29Bif3624/CDS/CDS    | 1.5  | 80.7  | 0.1  | L | COG0494                         | NTP pyrophosphohydrolases including oxidative damage repair enzymes                                                                                                                                         |
| TS29Fae07925/CDS/CDS   | 0.3  | 18.0  | 0.1  | L | COG1484                         | DNA replication protein                                                                                                                                                                                     |
| TS29Rum01844/CDS/CDS   | 0.3  | 18.4  | 0.1  | L | COG2801                         | Transposase and inactivated derivatives                                                                                                                                                                     |
| TS28Fae20136/CDS/CDS   | 1.0  | 55.5  | 0.1  | L | COG0587                         | DNA polymerase III, alpha subunit                                                                                                                                                                           |
| TS29Bac10257/CDS/CDS   | 0.3  | 14.0  | 0.1  | L | COG4974 COG0582 COG4973         | Site-specific recombinase XerD Integrase Site-specific recombinase XerC                                                                                                                                     |
| TS29Col1861/CDS/CDS    | 0.5  | 28.0  | 0.1  | L | COG0353                         | Recombinational DNA repair protein (RecF pathway)                                                                                                                                                           |
| TS29Fae01483/CDS/CDS   | 1.0  | 57.0  | 0.1  | L | COG0863                         | DNA modification methylase                                                                                                                                                                                  |
| TS28Bif0895/CDS/CDS    | 2.8  | 156.8 | 0.1  | L | COG1112                         | Superfamily I DNA and RNA helicases and helicase subunits                                                                                                                                                   |
| TS29Fae01391/CDS/CDS   | 1.2  | 68.5  | 0.1  | L | COG1533                         | DNA repair photolyase                                                                                                                                                                                       |
| TS29Par830/CDS/CDS     | 0.5  | 29.0  | 0.1  | L | COG4227                         | Antirestriction protein                                                                                                                                                                                     |
| TS29Rum21195/CDS/CDS   | 1.0  | 58.0  | 0.1  | L | COG1961                         | Site-specific recombinases, DNA invertase Pin homologs                                                                                                                                                      |
| BactD10428/CDS/CDS     | 0.5  | 29.0  | 0.1  | L | COG4227                         | Antirestriction protein                                                                                                                                                                                     |
| TS29Fae03430/CDS/CDS   | 2.0  | 117.5 | 0.1  | L | COG0749                         | DNA polymerase I - 3'-5' exonuclease and polymerase domains                                                                                                                                                 |
| TS29Rum15534/CDS/CDS   | 2.0  | 119.0 | 0.1  | L | COG0587                         | DNA polymerase III, alpha subunit                                                                                                                                                                           |
| Bero1279/CDS/CDS       | 0.3  | 18.7  | 0.1  | L | COG0507                         | ATP-dependent exoDNase (exonuclease V), alpha subunit - helicase superfamily I member                                                                                                                       |
| Cste0814/CDS/CDS       | 0.2  | 12.0  | 0.1  | L | COG4584                         | Transposase and inactivated derivatives                                                                                                                                                                     |

|                        |     |       |     |   |                         |                                                                                                                                                             |
|------------------------|-----|-------|-----|---|-------------------------|-------------------------------------------------------------------------------------------------------------------------------------------------------------|
| Cnex1210 CDS CDS       | 0.3 | 18.7  | 0.1 | L | COG1533                 | DNA repair photolyase                                                                                                                                       |
| TS28Bif5349 CDS CDS    | 0.8 | 46.7  | 0.1 | L | COG0749                 | DNA polymerase I - 3'-5' exonuclease and polymerase domains                                                                                                 |
| TS28Bif4152 CDS CDS    | 0.3 | 20.8  | 0.1 | L | COG0514 COG0507         | Superfamily II DNA helicase ATP-dependent exoDNAse (exonuclease V), alpha subunit - helicase superfamily I member                                           |
| TS29Bif1519 CDS CDS    | 0.3 | 20.8  | 0.1 | L | COG0514 COG0507         | Superfamily II DNA helicase ATP-dependent exoDNAse (exonuclease V), alpha subunit - helicase superfamily I member                                           |
| TS29Bif2295 CDS CDS    | 1.5 | 94.2  | 0.1 | L | COG1643                 | HrpA-like helicases                                                                                                                                         |
| TS29Bif3732 CDS CDS    | 2.8 | 172.8 | 0.1 | L | COG1112                 | Superfamily I DNA and RNA helicases and helicase subunits                                                                                                   |
| TS29RumUnc0143 CDS CDS | 1.0 | 63.0  | 0.1 | L | COG2189                 | Adenine specific DNA methylase Mod                                                                                                                          |
| TS29Bif2351 CDS CDS    | 0.5 | 31.5  | 0.1 | L | COG0210 COG1379         | Superfamily I DNA and RNA helicases Uncharacterized conserved protein                                                                                       |
| Csci0105 CDS CDS       | 1.3 | 81.1  | 0.1 | L | COG1961                 | Site-specific recombinases, DNA invertase Pin homologs                                                                                                      |
| TS29Rum17228 CDS CDS   | 0.5 | 32.0  | 0.1 | L | COG2255                 | Holliday junction resolvase, helicase subunit                                                                                                               |
| Robe3542 CDS CDS       | 0.3 | 16.0  | 0.1 | L | COG1961                 | Site-specific recombinases, DNA invertase Pin homologs                                                                                                      |
| FpraM2121397 CDS CDS   | 3.0 | 194.0 | 0.1 | L | COG1961                 | Site-specific recombinases, DNA invertase Pin homologs                                                                                                      |
| TS29Rum20324 CDS CDS   | 1.3 | 81.0  | 0.1 | L | COG5421                 | Transposase                                                                                                                                                 |
| TS29Bac00703 CDS CDS   | 1.0 | 65.0  | 0.1 | L | COG3547                 | Transposase and inactivated derivatives                                                                                                                     |
| Bxyl11638 CDS CDS      | 1.0 | 65.0  | 0.1 | L | COG3547                 | Transposase and inactivated derivatives                                                                                                                     |
| Acol1045 CDS CDS       | 0.7 | 44.3  | 0.1 | L | COG1961                 | Site-specific recombinases, DNA invertase Pin homologs                                                                                                      |
| TS29Coi1496 CDS CDS    | 0.5 | 33.0  | 0.1 | L | COG2812 COG0470         | DNA polymerase III, gamma/tau subunits ATPase involved in DNA replication                                                                                   |
| TS29Rum13830 CDS CDS   | 2.5 | 167.5 | 0.1 | L | COG3857                 | ATP-dependent nuclease, subunit B                                                                                                                           |
| TS29Rum19567 CDS CDS   | 0.5 | 33.5  | 0.1 | L | COG1961                 | Site-specific recombinases, DNA invertase Pin homologs                                                                                                      |
| TS29Fae08597 CDS CDS   | 0.5 | 34.0  | 0.1 | L | COG0708                 | Exonuclease III                                                                                                                                             |
| TS29Rum16540 CDS CDS   | 1.5 | 105.0 | 0.1 | L | COG0210                 | Superfamily I DNA and RNA helicases                                                                                                                         |
| TS29Coi1287 CDS CDS    | 1.3 | 93.5  | 0.1 | L | COG0188                 | Type IIA topoisomerase (DNA gyrase/topo II, topoisomerase IV), A subunit                                                                                    |
| TS29Fae21437 CDS CDS   | 0.3 | 23.5  | 0.1 | L | COG0582                 | Integrase                                                                                                                                                   |
| TS29Coi1238 CDS CDS    | 1.0 | 72.0  | 0.1 | L | COG0178                 | Excinuclease ATPase subunit                                                                                                                                 |
| FpraM2121954 CDS CDS   | 0.5 | 36.0  | 0.1 | L | COG0587                 | DNA polymerase III, alpha subunit                                                                                                                           |
| Rbro1703 CDS CDS       | 0.4 | 28.8  | 0.1 | L | COG3935                 | Putative primosome component and related proteins                                                                                                           |
| TS29Rum19546 CDS CDS   | 1.0 | 73.0  | 0.1 | L | COG3547                 | Transposase and inactivated derivatives                                                                                                                     |
| Cbol3905 CDS CDS       | 0.4 | 29.5  | 0.1 | L | COG3935                 | Putative primosome component and related proteins                                                                                                           |
| TS29Fae00119 CDS CDS   | 1.0 | 74.5  | 0.1 | L | COG0272                 | NAD-dependent DNA ligase (contains BRCT domain type II)                                                                                                     |
| TS29RumUnc1198 CDS CDS | 1.0 | 76.0  | 0.1 | L | COG3857                 | ATP-dependent nuclease, subunit B                                                                                                                           |
| TS29Coi1585 CDS CDS    | 0.5 | 38.0  | 0.1 | L | COG0592                 | DNA polymerase sliding clamp subunit (PCNA homolog)                                                                                                         |
| Dfor3087 CDS CDS       | 0.3 | 24.3  | 0.1 | L | COG0507                 | ATP-dependent exoDNAse (exonuclease V), alpha subunit - helicase superfamily I member                                                                       |
| TS29Rum21205 CDS CDS   | 0.5 | 39.3  | 0.1 | L | COG0389                 | Nucleotidyltransferase/DNA polymerase involved in DNA repair                                                                                                |
| TS29Bif0669 CDS CDS    | 0.8 | 60.4  | 0.1 | L | COG1372 COG0305         | Intein/homing endonuclease Replicative DNA helicase                                                                                                         |
| TS28Bif1084 CDS CDS    | 0.8 | 60.4  | 0.1 | L | COG1372 COG0305         | Intein/homing endonuclease Replicative DNA helicase                                                                                                         |
| TS29Bac10496 CDS CDS   | 1.0 | 81.0  | 0.1 | L | COG4227                 | Antirestriction protein                                                                                                                                     |
| TS29Fae01385 CDS CDS   | 1.0 | 82.0  | 0.1 | L | COG2256 COG2110         | ATPase related to the helicase subunit of the Holliday junction resolvase Predicted phosphatase homologous to the C-terminal domain of histone macroH2A1    |
| TS29Fae01431 CDS CDS   | 2.0 | 164.0 | 0.1 | L | COG1961                 | Site-specific recombinases, DNA invertase Pin homologs                                                                                                      |
| Bega1044 CDS CDS       | 0.2 | 13.8  | 0.1 | L | COG4974 COG0582         | Site-specific recombinase XerD Integrase                                                                                                                    |
| TS28Bif4427 CDS CDS    | 0.2 | 14.2  | 0.1 | L | COG0188                 | Type IIA topoisomerase (DNA gyrase/topo II, topoisomerase IV), A subunit                                                                                    |
| TS28Bif4598 CDS CDS    | 0.3 | 21.7  | 0.1 | L | COG0494                 | NTP pyrophosphohydrolases including oxidative damage repair enzymes                                                                                         |
| TS29Bif3199 CDS CDS    | 0.3 | 21.7  | 0.1 | L | COG0494                 | NTP pyrophosphohydrolases including oxidative damage repair enzymes                                                                                         |
| Casp0340 CDS CDS       | 0.5 | 43.5  | 0.1 | L | COG0582                 | Integrase                                                                                                                                                   |
| TS29Rum00228 CDS CDS   | 1.0 | 87.5  | 0.1 | L | COG0587                 | DNA polymerase III, alpha subunit                                                                                                                           |
| TS29RumUnc0815 CDS CDS | 1.0 | 88.0  | 0.1 | L | COG0587                 | DNA polymerase III, alpha subunit                                                                                                                           |
| Ccom0764 CDS CDS       | 0.2 | 17.9  | 0.1 | L | COG0358                 | DNA primase (bacterial type)                                                                                                                                |
| TS28Fae12194 CDS CDS   | 0.5 | 45.0  | 0.1 | L | COG0210 COG1074 COG2887 | Superfamily I DNA and RNA helicases ATP-dependent exoDNAse (exonuclease V) beta subunit (contains helicase and exonuclease domains) RecB family exonuclease |
| FpraM2122522 CDS CDS   | 0.5 | 45.4  | 0.0 | L | COG1484                 | DNA replication protein                                                                                                                                     |
| TS29Bif0764 CDS CDS    | 1.0 | 91.0  | 0.0 | L | COG3344                 | Retron-type reverse transcriptase                                                                                                                           |
| Rtor0134 CDS CDS       | 0.3 | 30.3  | 0.0 | L | COG3328                 | Transposase and inactivated derivatives                                                                                                                     |
| Rtor0268 CDS CDS       | 0.3 | 30.3  | 0.0 | L | COG3328                 | Transposase and inactivated derivatives                                                                                                                     |
| CspM6211315 CDS CDS    | 0.3 | 30.7  | 0.0 | L | COG3935                 | Putative primosome component and related proteins                                                                                                           |
| TS29Fae07197 CDS CDS   | 1.0 | 92.0  | 0.0 | L | COG1961                 | Site-specific recombinases, DNA invertase Pin homologs                                                                                                      |
| TS29Rum11630 CDS CDS   | 1.0 | 93.0  | 0.0 | L | COG1961                 | Site-specific recombinases, DNA invertase Pin homologs                                                                                                      |
| TS29Bif0534 CDS CDS    | 2.0 | 186.3 | 0.0 | L | COG3464                 | Transposase and inactivated derivatives                                                                                                                     |
| Rint1.13796 CDS CDS    | 0.3 | 26.8  | 0.0 | L | COG1961                 | Site-specific recombinases, DNA invertase Pin homologs                                                                                                      |
| Bxyl2351 CDS CDS       | 0.1 | 13.5  | 0.0 | L | COG3436                 | Transposase and inactivated derivatives                                                                                                                     |
| Svar2340 CDS CDS       | 1.0 | 94.7  | 0.0 | L | COG0358                 | DNA primase (bacterial type)                                                                                                                                |
| TS29Fae00497 CDS CDS   | 1.5 | 144.5 | 0.0 | L | COG0249                 | Mismatch repair ATPase (MutS family)                                                                                                                        |
| TS29Rum17721 CDS CDS   | 1.0 | 96.5  | 0.0 | L | COG2826                 | Transposase and inactivated derivatives, IS30 family                                                                                                        |
| TS28Rum11517 CDS CDS   | 0.3 | 32.3  | 0.0 | L | COG3328                 | Transposase and inactivated derivatives                                                                                                                     |
| TS28Bif4927 CDS CDS    | 2.3 | 223.9 | 0.0 | L | COG0210 COG2887         | Superfamily I DNA and RNA helicases RecB family exonuclease                                                                                                 |
| TS29Bif3491 CDS CDS    | 2.3 | 223.9 | 0.0 | L | COG0210 COG2887         | Superfamily I DNA and RNA helicases RecB family exonuclease                                                                                                 |
| TS29Bif3202 CDS CDS    | 1.7 | 166.1 | 0.0 | L | COG0556                 | Helicase subunit of the DNA excision repair complex                                                                                                         |
| TS29Fae09862 CDS CDS   | 1.0 | 100.0 | 0.0 | L | COG0582                 | Integrase                                                                                                                                                   |
| FpraM2120450 CDS CDS   | 0.3 | 25.1  | 0.0 | L | COG1961                 | Site-specific recombinases, DNA invertase Pin homologs                                                                                                      |
| TS29Fae03202 CDS CDS   | 1.0 | 101.0 | 0.0 | L | COG2801                 | Transposase and inactivated derivatives                                                                                                                     |
| TS29Fae09088 CDS CDS   | 1.0 | 102.5 | 0.0 | L | COG1961                 | Site-specific recombinases, DNA invertase Pin homologs                                                                                                      |
| Bcap3493 CDS CDS       | 0.1 | 9.3   | 0.0 | L | COG0507                 | ATP-dependent exoDNAse (exonuclease V), alpha subunit - helicase superfamily I member                                                                       |
| TS29Bif3071 CDS CDS    | 0.3 | 34.3  | 0.0 | L | COG3436                 | Transposase and inactivated derivatives                                                                                                                     |
| Ceut1170 CDS CDS       | 0.9 | 91.0  | 0.0 | L | COG0507                 | ATP-dependent exoDNAse (exonuclease V), alpha subunit - helicase superfamily I member                                                                       |
| Bcap2324 CDS CDS       | 0.8 | 90.9  | 0.0 | L | COG1961                 | Site-specific recombinases, DNA invertase Pin homologs                                                                                                      |
| Ceut1811 CDS CDS       | 1.0 | 105.0 | 0.0 | L | COG0507                 | ATP-dependent exoDNAse (exonuclease V), alpha subunit - helicase superfamily I member                                                                       |
| TS29RumUnc0157 CDS CDS | 0.3 | 37.4  | 0.0 | L | COG1961                 | Site-specific recombinases, DNA invertase Pin homologs                                                                                                      |
| TS29Bif3492 CDS CDS    | 1.5 | 168.8 | 0.0 | L | COG2887                 | RecB family exonuclease                                                                                                                                     |
| TS28Bif4928 CDS CDS    | 1.5 | 168.8 | 0.0 | L | COG2887                 | RecB family exonuclease                                                                                                                                     |
| TS29Fae01430 CDS CDS   | 1.0 | 113.0 | 0.0 | L | COG1961                 | Site-specific recombinases, DNA invertase Pin homologs                                                                                                      |
| TS29Bif2815 CDS CDS    | 1.0 | 113.5 | 0.0 | L | COG1204 COG4581 COG1202 | Superfamily II helicase Superfamily II RNA helicase Superfamily II helicase, archaea-specific                                                               |
| TS29Rum16681 CDS CDS   | 0.6 | 68.0  | 0.0 | L | COG5421                 | Transposase                                                                                                                                                 |
| TS29RumUnc0158 CDS CDS | 0.3 | 39.5  | 0.0 | L | COG1961                 | Site-specific recombinases, DNA invertase Pin homologs                                                                                                      |
| TS29Fae00212 CDS CDS   | 0.5 | 60.5  | 0.0 | L | COG0497                 | ATPase involved in DNA repair                                                                                                                               |
| Ccom2074 CDS CDS       | 0.5 | 59.3  | 0.0 | L | COG0507                 | ATP-dependent exoDNAse (exonuclease V), alpha subunit - helicase superfamily I member                                                                       |
| TS29Fae01429 CDS CDS   | 1.0 | 126.0 | 0.0 | L | COG1961                 | Site-specific recombinases, DNA invertase Pin homologs                                                                                                      |

|                      |      |       |      |     |                         |                                                                                                                                                             |
|----------------------|------|-------|------|-----|-------------------------|-------------------------------------------------------------------------------------------------------------------------------------------------------------|
| Ccom0010 CDS CDS     | 0.8  | 96.3  | 0.0  | L   | COG0675                 | Transposase and inactivated derivatives                                                                                                                     |
| Hfl12883 CDS CDS     | 0.5  | 64.3  | 0.0  | L   | COG0507                 | ATP-dependent exoDNase (exonuclease V), alpha subunit - helicase superfamily I member                                                                       |
| TS29Col0751 CDS CDS  | 0.5  | 67.0  | 0.0  | L   | COG0322                 | Nuclease subunit of the excinuclease complex                                                                                                                |
| CspM6211302 CDS CDS  | 0.1  | 19.3  | 0.0  | L   | COG1961                 | Site-specific recombinases, DNA invertase Pin homologs                                                                                                      |
| TS29Fae08666 CDS CDS | 1.0  | 137.0 | 0.0  | L   | COG0749                 | DNA polymerase I - 3'-5' exonuclease and polymerase domains                                                                                                 |
| Acol1043 CDS CDS     | 0.2  | 23.1  | 0.0  | L   | COG1484                 | DNA replication protein                                                                                                                                     |
| TS29Fae06183 CDS CDS | 1.5  | 220.0 | 0.0  | L   | COG1961                 | Site-specific recombinases, DNA invertase Pin homologs                                                                                                      |
| TS29Rum13789 CDS CDS | 0.5  | 74.0  | 0.0  | L   | COG2826                 | Transposase and inactivated derivatives, IS30 family                                                                                                        |
| TS29Bif097 CDS CDS   | 0.8  | 112.0 | 0.0  | L   | COG0749                 | DNA polymerase I - 3'-5' exonuclease and polymerase domains                                                                                                 |
| TS29Fae08189 CDS CDS | 1.0  | 149.5 | 0.0  | L   | COG0210 COG1074         | Superfamily I DNA and RNA helicases ATP-dependent exoDNase (exonuclease V) beta subunit (contains helicase and exonuclease domains)                         |
| Csci0106 CDS CDS     | 0.2  | 25.1  | 0.0  | L   | COG1484                 | DNA replication protein                                                                                                                                     |
| Robe2622 CDS CDS     | 0.3  | 50.3  | 0.0  | L   | COG4974 COG0582         | Site-specific recombinase XerD Integrase                                                                                                                    |
| Robe0878 CDS CDS     | 0.3  | 50.3  | 0.0  | L   | COG4974 COG0582         | Site-specific recombinase XerD Integrase                                                                                                                    |
| Robe3717 CDS CDS     | 0.3  | 50.3  | 0.0  | L   | COG4974 COG0582         | Site-specific recombinase XerD Integrase                                                                                                                    |
| TS29Fae03779 CDS CDS | 0.5  | 80.0  | 0.0  | L   | COG5377                 | Phage-related protein, predicted endonuclease                                                                                                               |
| TS28Fae1460 CDS CDS  | 1.0  | 166.0 | 0.0  | L   | COG3344                 | Retron-type reverse transcriptase                                                                                                                           |
| TS29Bif0995 CDS CDS  | 1.0  | 170.5 | 0.0  | L   | COG1198                 | Primosomal protein N' (replication factor Y) - superfamily II helicase                                                                                      |
| Cbol3901 CDS CDS     | 0.3  | 57.0  | 0.0  | L   | COG0507                 | ATP-dependent exoDNase (exonuclease V), alpha subunit - helicase superfamily I member                                                                       |
| TS29Fae05812 CDS CDS | 0.5  | 87.5  | 0.0  | L   | COG1961                 | Site-specific recombinases, DNA invertase Pin homologs                                                                                                      |
| TS29Rum00526 CDS CDS | 0.3  | 59.5  | 0.0  | L   | COG3666                 | Transposase and inactivated derivatives                                                                                                                     |
| TS29Bif1893 CDS CDS  | 0.3  | 59.5  | 0.0  | L   | COG1204 COG4581         | Superfamily II helicase Superfamily II RNA helicase                                                                                                         |
| TS29Bif0981 CDS CDS  | 0.6  | 115.3 | 0.0  | L   | COG1372 COG0188         | Intein/homing endonuclease Type IIA topoisomerase (DNA gyrase/topo II, topoisomerase IV), A subunit                                                         |
| RintL12726 CDS CDS   | 0.4  | 67.4  | 0.0  | L   | COG1961                 | Site-specific recombinases, DNA invertase Pin homologs                                                                                                      |
| Rtor0214 CDS CDS     | 0.2  | 30.3  | 0.0  | L   | COG2946                 | Putative phage replication protein RstA                                                                                                                     |
| Robe3718 CDS CDS     | 0.3  | 63.3  | 0.0  | L   | COG4974 COG0582 COG4973 | Site-specific recombinase XerD Integrase Site-specific recombinase XerC                                                                                     |
| Robe2623 CDS CDS     | 0.3  | 63.3  | 0.0  | L   | COG4974 COG0582 COG4973 | Site-specific recombinase XerD Integrase Site-specific recombinase XerC                                                                                     |
| Robe0879 CDS CDS     | 0.3  | 63.3  | 0.0  | L   | COG4974 COG0582 COG4973 | Site-specific recombinase XerD Integrase Site-specific recombinase XerC                                                                                     |
| Csci0107 CDS CDS     | 0.3  | 65.3  | 0.0  | L   | COG3935                 | Putative primosome component and related proteins                                                                                                           |
| Acol1042 CDS CDS     | 0.3  | 65.3  | 0.0  | L   | COG3935                 | Putative primosome component and related proteins                                                                                                           |
| TS29Fae00720 CDS CDS | 0.5  | 99.5  | 0.0  | L   | COG1961                 | Site-specific recombinases, DNA invertase Pin homologs                                                                                                      |
| TS29Bif2528 CDS CDS  | 0.5  | 102.4 | 0.0  | L   | COG0468                 | RecA/RadA recombinase                                                                                                                                       |
| TS29Fae09082 CDS CDS | 0.3  | 52.0  | 0.0  | L   | COG1961                 | Site-specific recombinases, DNA invertase Pin homologs                                                                                                      |
| TS29Bif5320 CDS CDS  | 0.3  | 53.8  | 0.0  | L   | COG0270                 | Site-specific DNA methylase                                                                                                                                 |
| TS29Bif0549 CDS CDS  | 0.3  | 53.8  | 0.0  | L   | COG0270                 | Site-specific DNA methylase                                                                                                                                 |
| TS29Bif5104 CDS CDS  | 0.3  | 57.8  | 0.0  | L   | COG1204 COG4581         | Superfamily II helicase Superfamily II RNA helicase                                                                                                         |
| CspM6211314 CDS CDS  | 0.2  | 43.0  | 0.0  | L   | COG1484                 | DNA replication protein                                                                                                                                     |
| TS29Bif5101 CDS CDS  | 0.3  | 64.7  | 0.0  | L   | COG2256                 | ATPase related to the helicase subunit of the Holliday junction resolvase                                                                                   |
| TS29Bif4054 CDS CDS  | 0.3  | 64.7  | 0.0  | L   | COG2256                 | ATPase related to the helicase subunit of the Holliday junction resolvase                                                                                   |
| CspS21813 CDS CDS    | 0.2  | 45.3  | 0.0  | L   | COG2946                 | Putative phage replication protein RstA                                                                                                                     |
| TS29Fae01424 CDS CDS | 0.3  | 100.0 | 0.0  | L   | COG1961                 | Site-specific recombinases, DNA invertase Pin homologs                                                                                                      |
| TS29Bif0475 CDS CDS  | 0.5  | 151.2 | 0.0  | L   | COG1195                 | Recombinational DNA repair ATPase (RecF pathway)                                                                                                            |
| FprM2122493 CDS CDS  | 0.1  | 28.4  | 0.0  | L   | COG0507                 | ATP-dependent exoDNase (exonuclease V), alpha subunit - helicase superfamily I member                                                                       |
| TS29Bif0477 CDS CDS  | 0.6  | 231.8 | 0.0  | L   | COG0187                 | Type IIA topoisomerase (DNA gyrase/topo II, topoisomerase IV), B subunit                                                                                    |
| TS29Bif0478 CDS CDS  | 0.3  | 121.3 | 0.0  | L   | COG1372 COG0188         | Intein/homing endonuclease Type IIA topoisomerase (DNA gyrase/topo II, topoisomerase IV), A subunit                                                         |
| Robe0877 CDS CDS     | 0.3  | 102.8 | 0.0  | L   | COG0582                 | Integrase                                                                                                                                                   |
| Robe3716 CDS CDS     | 0.3  | 102.8 | 0.0  | L   | COG0582                 | Integrase                                                                                                                                                   |
| Robe2621 CDS CDS     | 0.3  | 102.8 | 0.0  | L   | COG0582                 | Integrase                                                                                                                                                   |
| TS29Fae09860 CDS CDS | 0.3  | 103.0 | 0.0  | L   | COG4974 COG0582         | Site-specific recombinase XerD Integrase                                                                                                                    |
| TS29Bif2550 CDS CDS  | 0.3  | 114.3 | 0.0  | L   | COG0188                 | Type IIA topoisomerase (DNA gyrase/topo II, topoisomerase IV), A subunit                                                                                    |
| TS29Bif0610 CDS CDS  | 0.6  | 276.6 | 0.0  | L   | COG2812                 | DNA polymerase III, gamma/tau subunits                                                                                                                      |
| TS28Bif4428 CDS CDS  | 0.1  | 80.9  | 0.0  | L   | COG1372 COG0188         | Intein/homing endonuclease Type IIA topoisomerase (DNA gyrase/topo II, topoisomerase IV), A subunit                                                         |
| Even0584 CDS CDS     | 0.2  | 141.1 | 0.0  | L   | COG0358                 | DNA primase (bacterial type)                                                                                                                                |
| TS29Bif4053 CDS CDS  | 0.3  | 207.3 | 0.0  | L   | COG1204 COG4581         | Superfamily II helicase Superfamily II RNA helicase                                                                                                         |
| Casp0359 CDS CDS     | 5.0  | 1.5   | 15.1 | L B | COG0550 COG0551 COG5531 | Topoisomerase IA Zn-finger domain associated with topoisomerase type I SWIB-domain-containing proteins implicated in chromatin remodeling                   |
| TS28Rum02179 CDS CDS | 1.5  | 0.5   | 13.6 | L B | COG0550 COG0551 COG5531 | Topoisomerase IA Zn-finger domain associated with topoisomerase type I SWIB-domain-containing proteins implicated in chromatin remodeling                   |
| TS29Rum20503 CDS CDS | 1.5  | 108.0 | 0.1  | L B | COG0550 COG0551 COG5531 | Topoisomerase IA Zn-finger domain associated with topoisomerase type I SWIB-domain-containing proteins implicated in chromatin remodeling                   |
| TS29Rum19622 CDS CDS | 0.7  | 63.5  | 0.0  | L B | COG0550 COG0551 COG5531 | Topoisomerase IA Zn-finger domain associated with topoisomerase type I SWIB-domain-containing proteins implicated in chromatin remodeling                   |
| TS29Rum18715 CDS CDS | 1.3  | 136.3 | 0.0  | L B | COG0550 COG0551 COG5531 | Topoisomerase IA Zn-finger domain associated with topoisomerase type I SWIB-domain-containing proteins implicated in chromatin remodeling                   |
| TS28Fae14717 CDS CDS | 0.3  | 39.7  | 0.0  | L B | COG0550 COG0551 COG5531 | Topoisomerase IA Zn-finger domain associated with topoisomerase type I SWIB-domain-containing proteins implicated in chromatin remodeling                   |
| TS29Fae08918 CDS CDS | 0.3  | 41.5  | 0.0  | L B | COG0550 COG0551 COG5531 | Topoisomerase IA Zn-finger domain associated with topoisomerase type I SWIB-domain-containing proteins implicated in chromatin remodeling                   |
| Svar2339 CDS CDS     | 0.2  | 25.3  | 0.0  | L B | COG0550 COG0551 COG5531 | Topoisomerase IA Zn-finger domain associated with topoisomerase type I SWIB-domain-containing proteins implicated in chromatin remodeling                   |
| TS29Bif2593 CDS CDS  | 1.0  | 150.0 | 0.0  | L B | COG0550 COG0551 COG5531 | Topoisomerase IA Zn-finger domain associated with topoisomerase type I SWIB-domain-containing proteins implicated in chromatin remodeling                   |
| Rgna0696 CDS CDS     | 0.2  | 39.9  | 0.0  | L B | COG0550 COG0551 COG5531 | Topoisomerase IA Zn-finger domain associated with topoisomerase type I SWIB-domain-containing proteins implicated in chromatin remodeling                   |
| Eol0075 CDS CDS      | 0.2  | 56.8  | 0.0  | L B | COG0550 COG0551 COG5531 | Topoisomerase IA Zn-finger domain associated with topoisomerase type I SWIB-domain-containing proteins implicated in chromatin remodeling                   |
| BactD12937 CDS CDS   | 4.3  | 0.3   | 57.9 | L D | COG0419 COG1196         | ATPase involved in DNA repair Chromosome segregation ATPases                                                                                                |
| Bfin1435 CDS CDS     | 4.3  | 1.0   | 19.3 | L D | COG0419 COG1196         | ATPase involved in DNA repair Chromosome segregation ATPases                                                                                                |
| Buni1744 CDS CDS     | 25.0 | 4.0   | 28.4 | L H | COG0494 COG1235 COG0321 | NTP pyrophosphohydrolases including oxidative damage repair enzymes Metal dependent hydrolases of the beta-lactamase superfamily I Lipoate-protein ligase B |
| BactD11639 CDS CDS   | 2.3  | 0.3   | 42.4 | L I | COG0494 COG1443         | NTP pyrophosphohydrolases including oxidative damage repair enzymes Isopentenyl diphosphate isomerase                                                       |
| Bova3491 CDS CDS     | 1.0  | 0.3   | 18.2 | L I | COG0494 COG1443         | NTP pyrophosphohydrolases including oxidative damage repair enzymes Isopentenyl diphosphate isomerase                                                       |
| Ehal1725 CDS CDS     | 0.4  | 17.9  | 0.1  | L U | COG1961 COG2948 COG3293 | Site-specific recombinases, DNA invertase Pin homologs Type IV secretory pathway, VirB10 components Transposase and inactivated derivatives                 |

|                      |       |       |       |     |                                 |                                                                                                                                                                                                                       |
|----------------------|-------|-------|-------|-----|---------------------------------|-----------------------------------------------------------------------------------------------------------------------------------------------------------------------------------------------------------------------|
| FpraM2121413 CDS CDS | 1.3   | 61.0  | 0.1   | LJU | COG1961 COG2948                 | Site-specific recombinases, DNA invertase Pin homologs Type IV secretory pathway, VirB10 components                                                                                                                   |
| Robe2672 CDS CDS     | 3.0   | 139.7 | 0.1   | LJU | COG3505 COG1961                 | Type IV secretory pathway, VirD4 components Site-specific recombinases, DNA invertase Pin homologs                                                                                                                    |
| Rlac1242 CDS CDS     | 0.1   | 7.8   | 0.1   | LJU | COG1961 COG2948 COG3293         | Site-specific recombinases, DNA invertase Pin homologs Type IV secretory pathway, VirB10 components Transposase and inactivated derivatives                                                                           |
| Rtor1326 CDS CDS     | 1.0   | 81.7  | 0.1   | LJU | COG3505 COG1961                 | Type IV secretory pathway, VirD4 components Site-specific recombinases, DNA invertase Pin homologs                                                                                                                    |
| TS29Fae03372 CDS CDS | 2.0   | 184.0 | 0.0   | LJU | COG1961 COG2948                 | Site-specific recombinases, DNA invertase Pin homologs Type IV secretory pathway, VirB10 components                                                                                                                   |
| TS29Rum18376 CDS CDS | 0.3   | 23.8  | 0.0   | LJU | COG1961 COG2948 COG3293         | Site-specific recombinases, DNA invertase Pin homologs Type IV secretory pathway, VirB10 components Transposase and inactivated derivatives                                                                           |
| Rgna3503 CDS CDS     | 0.1   | 24.3  | 0.0   | LJU | COG1961 COG2948 COG3293         | Site-specific recombinases, DNA invertase Pin homologs Type IV secretory pathway, VirB10 components Transposase and inactivated derivatives                                                                           |
| Cnex1121 CDS CDS     | 0.1   | 24.3  | 0.0   | LJU | COG1961 COG2948 COG3293         | Site-specific recombinases, DNA invertase Pin homologs Type IV secretory pathway, VirB10 components Transposase and inactivated derivatives                                                                           |
| FpraM2122467 CDS CDS | 0.5   | 86.0  | 0.0   | LJU | COG1961 COG2948                 | Site-specific recombinases, DNA invertase Pin homologs Type IV secretory pathway, VirB10 components                                                                                                                   |
| CspM6211944 CDS CDS  | 1.0   | 295.8 | 0.0   | LJU | COG3505 COG1961                 | Type IV secretory pathway, VirD4 components Site-specific recombinases, DNA invertase Pin homologs                                                                                                                    |
| Acol2738 CDS CDS     | 1.0   | 347.8 | 0.0   | LJU | COG3505 COG1961                 | Type IV secretory pathway, VirD4 components Site-specific recombinases, DNA invertase Pin homologs                                                                                                                    |
| Dlon1325 CDS CDS     | 0.4   | 134.5 | 0.0   | LJU | COG3505 COG1961                 | Type IV secretory pathway, VirD4 components Site-specific recombinases, DNA invertase Pin homologs                                                                                                                    |
| TS28Eub8187 CDS CDS  | 7.0   | 2.5   | 12.7  | LJV | COG1131 COG3666 COG4152 COG4586 | ABC-type multidrug transport system, ATPase component Transposase and inactivated derivatives ABC-type uncharacterized transport system, ATPase component ABC-type uncharacterized transport system, ATPase component |
| TS29Bif2990 CDS CDS  | 0.5   | 51.2  | 0.0   | LJV | COG1131 COG3666                 | ABC-type multidrug transport system, ATPase component Transposase and inactivated derivatives                                                                                                                         |
| Dfor0353 CDS CDS     | 281.0 | 3.0   | 425.2 | M   | COG1087                         | UDP-glucose 4-epimerase                                                                                                                                                                                               |
| Bun0727 CDS CDS      | 50.5  | 1.5   | 152.8 | M   | COG1887                         | Putative glycosyl/glycerophosphate transferases involved in teichoic acid biosynthesis TagF TagB EpsI RodC                                                                                                            |
| Bfra31123865 CDS CDS | 19.5  | 0.6   | 151.5 | M   | COG3209                         | Rhs family protein                                                                                                                                                                                                    |
| TS29Par381 CDS CDS   | 26.5  | 1.0   | 120.3 | M   | COG1664                         | Integral membrane protein CcmA involved in cell shape determination                                                                                                                                                   |
| Caer0911 CDS CDS     | 26.0  | 1.0   | 118.0 | M   | COG1388 COG0791                 | FOG: LysM repeat Cell wall-associated hydrolases (invasion-associated proteins)                                                                                                                                       |
| BactD13204 CDS CDS   | 8.6   | 0.3   | 116.7 | M   | COG2885                         | Outer membrane protein and related peptidoglycan-associated (lipo)proteins                                                                                                                                            |
| TS28Fae18454 CDS CDS | 12.0  | 0.5   | 109.0 | M   | COG0438                         | Glycosyltransferase                                                                                                                                                                                                   |
| Bun11596 CDS CDS     | 10.8  | 0.5   | 98.4  | M   | COG2885                         | Outer membrane protein and related peptidoglycan-associated (lipo)proteins                                                                                                                                            |
| TS29Bac03642 CDS CDS | 10.0  | 0.5   | 90.8  | M   | COG1181                         | D-alanine-D-alanine ligase and related ATP-grasp enzymes                                                                                                                                                              |
| Acae3081 CDS CDS     | 18.0  | 1.0   | 81.7  | M   | COG0794                         | Predicted sugar phosphate isomerase involved in capsule formation                                                                                                                                                     |
| TS28Rum15589 CDS CDS | 7.5   | 0.5   | 68.1  | M   | COG3773                         | Cell wall hydrolyses involved in spore germination                                                                                                                                                                    |
| TS28Bac1101 CDS CDS  | 4.3   | 0.3   | 59.0  | M   | COG0793                         | Periplasmic protease                                                                                                                                                                                                  |
| Bun13092 CDS CDS     | 4.3   | 0.3   | 59.0  | M   | COG0793                         | Periplasmic protease                                                                                                                                                                                                  |
| Bxvl4005 CDS CDS     | 5.7   | 0.5   | 51.5  | M   | COG2885                         | Outer membrane protein and related peptidoglycan-associated (lipo)proteins                                                                                                                                            |
| TS28Rum14452 CDS CDS | 9.5   | 1.0   | 43.1  | M   | COG0771                         | UDP-N-acetylmuramoylalanine-D-glutamate ligase                                                                                                                                                                        |
| TS28Fae02811 CDS CDS | 16.0  | 2.0   | 36.3  | M   | COG4948                         | L-alanine-DL-glutamate epimerase and related enzymes of enolase superfamily                                                                                                                                           |
| TS28Fae12113 CDS CDS | 4.0   | 0.5   | 36.3  | M   | COG0438                         | Glycosyltransferase                                                                                                                                                                                                   |
| TS28Bac6034 CDS CDS  | 2.7   | 0.3   | 36.3  | M   | COG1043                         | Acyl-[acyl carrier protein]-UDP-N-acetylglucosamine O-acyltransferase                                                                                                                                                 |
| Bun0765 CDS CDS      | 2.7   | 0.3   | 36.3  | M   | COG1043                         | Acyl-[acyl carrier protein]-UDP-N-acetylglucosamine O-acyltransferase                                                                                                                                                 |
| Dlon1846 CDS CDS     | 3.5   | 0.5   | 31.8  | M   | COG0275                         | Predicted S-adenosylmethionine-dependent methyltransferase involved in cell envelope biogenesis                                                                                                                       |
| Aput1465 CDS CDS     | 14.0  | 2.0   | 31.8  | M   | COG1004                         | Predicted UDP-glucose 6-dehydrogenase                                                                                                                                                                                 |
| TS28Fae17534 CDS CDS | 3.5   | 0.5   | 31.8  | M   | COG1346 COG1380                 | Putative effector of murein hydrolase Putative effector of murein hydrolase LrgA                                                                                                                                      |
| TS28Rum16477 CDS CDS | 10.3  | 1.5   | 31.0  | M   | COG1087                         | UDP-glucose 4-epimerase                                                                                                                                                                                               |
| TS28Fae10727 CDS CDS | 3.3   | 0.5   | 30.3  | M   | COG3757                         | Lysozyme M1 (1,4-beta-N-acetylmuramidase)                                                                                                                                                                             |
| TS28Bac4748 CDS CDS  | 3.3   | 0.5   | 30.3  | M   | COG0449                         | Glucosamine 6-phosphate synthetase, contains amidotransferase and phosphosugar isomerase domains                                                                                                                      |
| BactD13908 CDS CDS   | 2.2   | 0.3   | 30.0  | M   | COG0794                         | Predicted sugar phosphate isomerase involved in capsule formation                                                                                                                                                     |
| Bun13001 CDS CDS     | 2.2   | 0.3   | 29.5  | M   | COG0768                         | Cell division protein FtsI/penicillin-binding protein 2                                                                                                                                                               |
| TS28Bac2244 CDS CDS  | 2.2   | 0.3   | 29.5  | M   | COG0768                         | Cell division protein FtsI/penicillin-binding protein 2                                                                                                                                                               |
| TS29Bac03657 CDS CDS | 6.5   | 1.0   | 29.5  | M   | COG4775                         | Outer membrane protein/protective antigen OMA87                                                                                                                                                                       |
| Bun12105 CDS CDS     | 12.5  | 2.0   | 28.4  | M   | COG1087                         | UDP-glucose 4-epimerase                                                                                                                                                                                               |
| TS28Bac5564 CDS CDS  | 4.0   | 0.7   | 27.2  | M   | COG4948                         | L-alanine-DL-glutamate epimerase and related enzymes of enolase superfamily                                                                                                                                           |
| TS29Bac02721 CDS CDS | 74.0  | 13.0  | 25.8  | M   | COG3209                         | Rhs family protein                                                                                                                                                                                                    |
| Bxvl1472 CDS CDS     | 21.6  | 3.8   | 25.5  | M   | COG2885                         | Outer membrane protein and related peptidoglycan-associated (lipo)proteins                                                                                                                                            |
| Aput1907 CDS CDS     | 11.0  | 2.0   | 25.0  | M   | COG0793                         | Periplasmic protease                                                                                                                                                                                                  |
| TS28Fae08672 CDS CDS | 11.0  | 2.0   | 25.0  | M   | COG3764                         | Sortase (surface protein transpeptidase)                                                                                                                                                                              |
| TS28Fae08674 CDS CDS | 27.0  | 5.0   | 24.5  | M   | COG4932                         | Predicted outer membrane protein                                                                                                                                                                                      |
| Bxvl2539 CDS CDS     | 2.7   | 0.5   | 24.2  | M   | COG0773                         | UDP-N-acetylmuramate-alanine ligase                                                                                                                                                                                   |
| TS29Bac06795 CDS CDS | 2.7   | 0.5   | 24.2  | M   | COG1043                         | Acyl-[acyl carrier protein]-UDP-N-acetylglucosamine O-acyltransferase                                                                                                                                                 |
| BactD2350 CDS CDS    | 5.2   | 1.0   | 23.8  | M   | COG2885                         | Outer membrane protein and related peptidoglycan-associated (lipo)proteins                                                                                                                                            |
| BactD13371 CDS CDS   | 10.2  | 2.0   | 23.2  | M   | COG2885                         | Outer membrane protein and related peptidoglycan-associated (lipo)proteins                                                                                                                                            |
| TS28Rum04443 CDS CDS | 1.7   | 0.3   | 22.7  | M   | COG3883 COG0791                 | Uncharacterized protein conserved in bacteria Cell wall-associated hydrolases (invasion-associated proteins)                                                                                                          |
| Bthe7335556 CDS CDS  | 1.7   | 0.3   | 22.7  | M   | COG0275                         | Predicted S-adenosylmethionine-dependent methyltransferase involved in cell envelope biogenesis                                                                                                                       |
| TS28Col0487 CDS CDS  | 5.0   | 1.0   | 22.7  | M   | COG0796                         | Glutamate racemase                                                                                                                                                                                                    |
| TS28Fae16438 CDS CDS | 5.0   | 1.0   | 22.7  | M   | COG5434                         | Endopolysaccharuronase                                                                                                                                                                                                |
| TS28Fae01996 CDS CDS | 2.5   | 0.5   | 22.7  | M   | COG0438 COG0463 COG1543         | Glycosyltransferase Glycosyltransferases involved in cell wall biogenesis Uncharacterized conserved protein                                                                                                           |
| Bthe3733491 CDS CDS  | 12.1  | 2.6   | 21.3  | M   | COG3209                         | Rhs family protein                                                                                                                                                                                                    |
| TS28Bac5428 CDS CDS  | 1.5   | 0.3   | 20.4  | M   | COG0773                         | UDP-N-acetylmuramate-alanine ligase                                                                                                                                                                                   |
| Caer0379 CDS CDS     | 4.5   | 1.0   | 20.4  | M   | COG0275                         | Predicted S-adenosylmethionine-dependent methyltransferase involved in cell envelope biogenesis                                                                                                                       |
| TS28Bac3217 CDS CDS  | 6.0   | 1.3   | 20.4  | M   | COG0769 COG0770                 | UDP-N-acetylmuramyl tripeptide synthase UDP-N-acetylmuramyl pentapeptide synthase                                                                                                                                     |
| Bun1477 CDS CDS      | 4.3   | 1.0   | 19.7  | M   | COG0449                         | Glucosamine 6-phosphate synthetase, contains amidotransferase and phosphosugar isomerase domains                                                                                                                      |
| TS28Met1177 CDS CDS  | 3.6   | 0.8   | 19.5  | M   | COG1210                         | UDP-glucose pyrophosphorylase                                                                                                                                                                                         |
| BactD11310 CDS CDS   | 1.3   | 0.3   | 18.2  | M   | COG1209                         | dTDP-glucose pyrophosphorylase                                                                                                                                                                                        |
| ShiispD90537 CDS CDS | 2.0   | 0.5   | 18.2  | M   | COG1087                         | UDP-glucose 4-epimerase                                                                                                                                                                                               |
| TS28A10459 CDS CDS   | 4.0   | 1.0   | 18.2  | M   | COG4775                         | Outer membrane protein/protective antigen OMA87                                                                                                                                                                       |

|                                     |      |      |      |   |                                 |                                                                                                                                                                                                                                         |
|-------------------------------------|------|------|------|---|---------------------------------|-----------------------------------------------------------------------------------------------------------------------------------------------------------------------------------------------------------------------------------------|
| BactD20657 CDS CDS                  | 2.0  | 0.5  | 18.2 | M | COG0744 COG5009                 | Membrane carboxypeptidase (penicillin-binding protein) Membrane carboxypeptidase/penicillin-binding protein                                                                                                                             |
| Casp3572 CDS CDS                    | 4.0  | 1.0  | 18.2 | M | COG1686                         | D-alanyl-D-alanine carboxypeptidase                                                                                                                                                                                                     |
| Ccom0922 CDS CDS                    | 8.0  | 2.0  | 18.2 | M | COG0771                         | UDP-N-acetyl-muramoylalanine-D-glutamate ligase                                                                                                                                                                                         |
| RintL12189 CDS CDS                  | 4.0  | 1.0  | 18.2 | M | COG0845                         | Membrane-fusion protein                                                                                                                                                                                                                 |
| Aput0950 CDS CDS                    | 4.0  | 1.0  | 18.2 | M | COG0771                         | UDP-N-acetyl-muramoylalanine-D-glutamate ligase                                                                                                                                                                                         |
| b0759 CDS UDP-galactose-4-epimerase | 2.0  | 0.5  | 18.2 | M | COG1087                         | UDP-glucose 4-epimerase                                                                                                                                                                                                                 |
| Dlon2639 CDS CDS                    | 2.0  | 0.5  | 18.2 | M | COG0707                         | UDP-N-acetylglucosamine:LPS N-acetylglucosamine transferase                                                                                                                                                                             |
| Bxyl1067 CDS CDS                    | 2.7  | 0.7  | 18.2 | M | COG3049                         | Penicillin V acylase and related amidases                                                                                                                                                                                               |
| BactD11915 CDS CDS                  | 2.7  | 0.7  | 18.2 | M | COG3049                         | Penicillin V acylase and related amidases                                                                                                                                                                                               |
| BactD22517 CDS CDS                  | 9.0  | 2.3  | 17.5 | M | COG3209                         | Rhs family protein                                                                                                                                                                                                                      |
| Bthe3733495 CDS CDS                 | 50.0 | 13.2 | 17.2 | M | COG4886 COG3209 COG5276         | Leucine-rich repeat (LRR) protein Rhs family protein Uncharacterized conserved protein                                                                                                                                                  |
| Aput1467 CDS CDS                    | 11.0 | 3.0  | 16.6 | M | COG1091                         | dTDP-4-dehydrohamnose reductase                                                                                                                                                                                                         |
| Buni1406 CDS CDS                    | 3.5  | 1.0  | 15.9 | M | COG1215                         | Glycosyltransferases, probably involved in cell wall biogenesis                                                                                                                                                                         |
| TS28Bac2239 CDS CDS                 | 3.5  | 1.0  | 15.9 | M | COG0438 COG1543                 | Glycosyltransferase Uncharacterized conserved protein                                                                                                                                                                                   |
| TS28Bif4864 CDS CDS                 | 1.8  | 0.5  | 15.9 | M | COG0787 COG0802                 | Alanine racemase Predicted ATPase or kinase                                                                                                                                                                                             |
| Cbol2247 CDS CDS                    | 7.0  | 2.0  | 15.9 | M | COG1181                         | D-alanine-D-alanine ligase and related ATP-grasp enzymes                                                                                                                                                                                |
| TS28Rum11795 CDS CDS                | 7.0  | 2.0  | 15.9 | M | COG2148 COG0707                 | Sugar transferases involved in lipopolysaccharide synthesis UDP-N-acetylglucosamine:LPS N-acetylglucosamine transferase                                                                                                                 |
| Buni1330 CDS CDS                    | 2.3  | 0.7  | 15.9 | M | COG0463 COG2246                 | Glycosyltransferases involved in cell wall biogenesis Predicted membrane protein                                                                                                                                                        |
| TS28Bac1301 CDS CDS                 | 2.3  | 0.7  | 15.9 | M | COG0463 COG2246                 | Glycosyltransferases involved in cell wall biogenesis Predicted membrane protein                                                                                                                                                        |
| TS28Fae00348 CDS CDS                | 8.5  | 2.5  | 15.4 | M | COG0517 COG0399                 | FOG: CBS domain Predicted pyridoxal phosphate-dependent enzyme apparently involved in regulation of cell wall biogenesis                                                                                                                |
| Bova3011 CDS CDS                    | 3.4  | 1.0  | 15.3 | M | COG2885                         | Outer membrane protein and related peptidoglycan-associated (lipo)proteins                                                                                                                                                              |
| BactD20408 CDS CDS                  | 5.0  | 1.5  | 15.1 | M | COG0449                         | Glucosamine 6-phosphate synthetase, contains amidotransferase and phosphosugar isomerase domains                                                                                                                                        |
| Rior1960 CDS CDS                    | 5.0  | 1.5  | 15.1 | M | COG3764                         | Sortase (surface protein transpeptidase)                                                                                                                                                                                                |
| TS28Rum07177 CDS CDS                | 5.0  | 1.5  | 15.1 | M | COG3764                         | Sortase (surface protein transpeptidase)                                                                                                                                                                                                |
| TS28Rum09521 CDS CDS                | 1.7  | 0.5  | 15.1 | M | COG0845                         | Membrane-fusion protein                                                                                                                                                                                                                 |
| TS29Bac03581 CDS CDS                | 24.2 | 7.3  | 15.0 | M | COG2885                         | Outer membrane protein and related peptidoglycan-associated (lipo)proteins                                                                                                                                                              |
| TS29Bac08589 CDS CDS                | 32.5 | 10.0 | 14.8 | M | COG2885                         | Outer membrane protein and related peptidoglycan-associated (lipo)proteins                                                                                                                                                              |
| FrnaM2120556 CDS CDS                | 6.2  | 2.0  | 14.0 | M | COG4886 COG4932                 | Leucine-rich repeat (LRR) protein Predicted outer membrane protein                                                                                                                                                                      |
| TS28Eub4771 CDS CDS                 | 1.0  | 0.3  | 13.6 | M | COG0771                         | UDP-N-acetyl-muramoylalanine-D-glutamate ligase                                                                                                                                                                                         |
| Rbro1448 CDS CDS                    | 1.0  | 0.3  | 13.6 | M | COG0771                         | UDP-N-acetyl-muramoylalanine-D-glutamate ligase                                                                                                                                                                                         |
| TS28Bac4161 CDS CDS                 | 1.0  | 0.3  | 13.6 | M | COG3049                         | Penicillin V acylase and related amidases                                                                                                                                                                                               |
| BactD11309 CDS CDS                  | 1.0  | 0.3  | 13.6 | M | COG1088                         | dTDP-D-glucose 4,6-dehydratase                                                                                                                                                                                                          |
| Buni3008 CDS CDS                    | 1.0  | 0.3  | 13.6 | M | COG0773                         | UDP-N-acetyl-muramate-alanine ligase                                                                                                                                                                                                    |
| TS28Fae10280 CDS CDS                | 4.0  | 1.3  | 13.6 | M | COG0750                         | Predicted membrane-associated Zn-dependent proteases 1                                                                                                                                                                                  |
| TS29Fae05751 CDS CDS                | 4.0  | 1.3  | 13.6 | M | COG0750                         | Predicted membrane-associated Zn-dependent proteases 1                                                                                                                                                                                  |
| Csci1066 CDS CDS                    | 3.0  | 1.0  | 13.6 | M | COG0768                         | Cell division protein FtsI/penicillin-binding protein 2                                                                                                                                                                                 |
| Bcap2672 CDS CDS                    | 3.0  | 1.0  | 13.6 | M | COG0463 COG2246                 | Glycosyltransferases involved in cell wall biogenesis Predicted membrane protein                                                                                                                                                        |
| Bova2815 CDS CDS                    | 3.0  | 1.0  | 13.6 | M | COG1388 COG0739                 | FOG: LysM repeat Membrane proteins related to metalloendopeptidases                                                                                                                                                                     |
| RintL12454 CDS CDS                  | 3.0  | 1.0  | 13.6 | M | COG1368                         | Phosphoglycerol transferase and related proteins, alkaline phosphatase superfamily                                                                                                                                                      |
| Bcap0706 CDS CDS                    | 3.0  | 1.0  | 13.6 | M | COG1922 COG2148                 | Teichoic acid biosynthesis proteins Sugar transferases involved in lipopolysaccharide synthesis                                                                                                                                         |
| TS29Bac08801 CDS CDS                | 3.0  | 1.0  | 13.6 | M | COG0739                         | Membrane proteins related to metalloendopeptidases                                                                                                                                                                                      |
| TS28Rum13006 CDS CDS                | 3.0  | 1.0  | 13.6 | M | COG0845                         | Membrane-fusion protein                                                                                                                                                                                                                 |
| ShigspD91330 CDS CDS                | 3.0  | 1.0  | 13.6 | M | COG0773                         | UDP-N-acetyl-muramate-alanine ligase                                                                                                                                                                                                    |
| Ccom1964 CDS CDS                    | 3.0  | 1.0  | 13.6 | M | COG0769 COG0770                 | UDP-N-acetyl-muramyl tripeptide synthase UDP-N-acetyl-muramyl pentapeptide synthase                                                                                                                                                     |
| TS28Fae03437 CDS CDS                | 3.0  | 1.0  | 13.6 | M | COG0766                         | UDP-N-acetylglucosamine enolpyruvyl transferase                                                                                                                                                                                         |
| TS28Fae22537 CDS CDS                | 3.0  | 1.0  | 13.6 | M | COG1088                         | dTDP-D-glucose 4,6-dehydratase                                                                                                                                                                                                          |
| RintL11515 CDS CDS                  | 3.0  | 1.0  | 13.6 | M | COG0463 COG1887 COG1216         | Glycosyltransferases involved in cell wall biogenesis Putative glycosyl/glycerophosphate transferases involved in teichoic acid biosynthesis TagF/TagB/EpsJ/RodC Predicted glycosyltransferases                                         |
| Buni3002 CDS CDS                    | 7.0  | 2.3  | 13.6 | M | COG0769 COG0770                 | UDP-N-acetyl-muramyl tripeptide synthase UDP-N-acetyl-muramyl pentapeptide synthase                                                                                                                                                     |
| Buni1697 CDS CDS                    | 13.3 | 4.5  | 13.4 | M | COG0845                         | Membrane-fusion protein                                                                                                                                                                                                                 |
| Bfraf1123864 CDS CDS                | 25.0 | 8.5  | 13.3 | M | COG3209 COG5276                 | Rhs family protein Uncharacterized conserved protein                                                                                                                                                                                    |
| Rgna3058 CDS CDS                    | 8.5  | 3.0  | 12.9 | M | COG0275                         | Predicted S-adenosylmethionine-dependent methyltransferase involved in cell envelope biogenesis                                                                                                                                         |
| Aput1897 CDS CDS                    | 17.0 | 6.0  | 12.9 | M | COG1368                         | Phosphoglycerol transferase and related proteins, alkaline phosphatase superfamily                                                                                                                                                      |
| TS29Bac05145 CDS CDS                | 22.2 | 8.0  | 12.6 | M | COG2885                         | Outer membrane protein and related peptidoglycan-associated (lipo)proteins                                                                                                                                                              |
| TS28Rum01499 CDS CDS                | 23.0 | 8.5  | 12.3 | M | COG0845                         | Membrane-fusion protein                                                                                                                                                                                                                 |
| TS29Par279 CDS CDS                  | 4.0  | 1.5  | 12.1 | M | COG1181                         | D-alanine-D-alanine ligase and related ATP-grasp enzymes                                                                                                                                                                                |
| BactD22211 CDS CDS                  | 1.3  | 0.5  | 12.1 | M | COG0275                         | Predicted S-adenosylmethionine-dependent methyltransferase involved in cell envelope biogenesis                                                                                                                                         |
| Bova1669 CDS CDS                    | 4.3  | 1.7  | 11.8 | M | COG1087                         | UDP-glucose 4-epimerase                                                                                                                                                                                                                 |
| BactD23345 CDS CDS                  | 1.7  | 0.7  | 11.3 | M | COG0357                         | Predicted S-adenosylmethionine-dependent methyltransferase involved in bacterial cell division                                                                                                                                          |
| Cbol0545 CDS CDS                    | 5.0  | 2.0  | 11.3 | M | COG0275                         | Predicted S-adenosylmethionine-dependent methyltransferase involved in cell envelope biogenesis                                                                                                                                         |
| TS28Rum16310 CDS CDS                | 2.5  | 1.0  | 11.3 | M | COG0463 COG1216 COG1887 COG3754 | Glycosyltransferases involved in cell wall biogenesis Predicted glycosyltransferases Putative glycosyl/glycerophosphate transferases involved in teichoic acid biosynthesis TagF/TagB/EpsJ/RodC Lipopolysaccharide biosynthesis protein |
| Even1783 CDS CDS                    | 5.0  | 2.0  | 11.3 | M | COG5498                         | Predicted glycosyl hydrolase                                                                                                                                                                                                            |
| Buni0590 CDS CDS                    | 2.5  | 1.0  | 11.3 | M | COG0845                         | Membrane-fusion protein                                                                                                                                                                                                                 |
| Clep2070 CDS CDS                    | 1.7  | 0.7  | 11.3 | M | COG1088                         | dTDP-D-glucose 4,6-dehydratase                                                                                                                                                                                                          |
| TS28Rum14458 CDS CDS                | 32.1 | 13.3 | 10.9 | M | COG0275                         | Predicted S-adenosylmethionine-dependent methyltransferase involved in cell envelope biogenesis                                                                                                                                         |
| TS28Rum14451 CDS CDS                | 10.5 | 4.5  | 10.6 | M | COG0766                         | UDP-N-acetylglucosamine enolpyruvyl transferase                                                                                                                                                                                         |
| Cbol4143 CDS CDS                    | 7.0  | 3.0  | 10.6 | M | COG1876                         | D-alanyl-D-alanine carboxypeptidase                                                                                                                                                                                                     |
| Buni1800 CDS CDS                    | 3.5  | 1.5  | 10.6 | M | COG3858 COG1215                 | Predicted glycosyl hydrolase Glycosyltransferases, probably involved in cell wall biogenesis                                                                                                                                            |
| ShigspD90212 CDS CDS                | 3.5  | 1.5  | 10.6 | M | COG1209                         | dTDP-glucose pyrophosphorylase                                                                                                                                                                                                          |
| TS28Fae18682 CDS CDS                | 3.5  | 1.5  | 10.6 | M | COG1696                         | Predicted membrane protein involved in D-alanine export                                                                                                                                                                                 |
| Robe1118 CDS CDS                    | 1.2  | 0.5  | 10.6 | M | COG0845                         | Membrane-fusion protein                                                                                                                                                                                                                 |
| Clep1094 CDS CDS                    | 2.3  | 1.0  | 10.6 | M | COG0771                         | UDP-N-acetyl-muramoylalanine-D-glutamate ligase                                                                                                                                                                                         |
| Bxyl1425 CDS CDS                    | 2.3  | 1.0  | 10.6 | M | COG1596                         | Periplasmic protein involved in polysaccharide export                                                                                                                                                                                   |

|                        |      |       |      |   |                                 |                                                                                                                                                                                                                |
|------------------------|------|-------|------|---|---------------------------------|----------------------------------------------------------------------------------------------------------------------------------------------------------------------------------------------------------------|
| TS28Clo08359 CDS CDS   | 2.3  | 1.0   | 10.6 | M | COG0771                         | UDP-N-acetylmuramoylalanine-D-glutamate ligase                                                                                                                                                                 |
| BactD13168 CDS CDS     | 2.3  | 1.0   | 10.6 | M | COG1596                         | Periplasmic protein involved in polysaccharide export                                                                                                                                                          |
| Msm1740177 CDS CDS     | 0.8  | 0.3   | 10.2 | M | COG0472                         | UDP-N-acetylmuramyl pentapeptide phosphotransferase/UDP-N-acetylglucosamine-1-phosphate transferase                                                                                                            |
| Cnex0258 CDS CDS       | 9.0  | 4.0   | 10.2 | M | COG0481                         | Membrane GTPase LepA                                                                                                                                                                                           |
| Bxyl4354 CDS CDS       | 2.2  | 1.0   | 10.1 | M | COG2885                         | Outer membrane protein and related peptidoglycan-associated (lipo)proteins                                                                                                                                     |
| TS29Bac02766 CDS CDS   | 20.0 | 9.0   | 10.1 | M | COG1970                         | Large-conductance mechanosensitive channel                                                                                                                                                                     |
| TS28Rum14888 CDS CDS   | 21.0 | 9.5   | 10.0 | M | COG0768                         | Cell division protein FtsI/penicillin-binding protein 2                                                                                                                                                        |
| TS29Fae01172 CDS CDS   | 2.0  | 91.5  | 0.1  | M | COG5434                         | Endopolygalacturonase                                                                                                                                                                                          |
| TS29Fae08277 CDS CDS   | 1.5  | 69.5  | 0.1  | M | COG3757 COG5263                 | Lysozyme M1 (1,4-beta-N-acetylmuramidase) FOG: Glucan-binding domain (YG repeat)                                                                                                                               |
| TS29Bac07785 CDS CDS   | 0.3  | 15.5  | 0.1  | M | COG0768                         | Cell division protein FtsI/penicillin-binding protein 2                                                                                                                                                        |
| TS28Eub7067 CDS CDS    | 1.3  | 62.0  | 0.1  | M | COG4932                         | Predicted outer membrane protein                                                                                                                                                                               |
| TS29Bac08778 CDS CDS   | 0.3  | 15.7  | 0.1  | M | COG0845                         | Membrane-fusion protein                                                                                                                                                                                        |
| TS29Bif3408 CDS CDS    | 2.0  | 94.5  | 0.1  | M | COG1368                         | Phosphoglycerol transferase and related proteins, alkaline phosphatase superfamily                                                                                                                             |
| TS28Fae08969 CDS CDS   | 0.5  | 24.0  | 0.1  | M | COG1091                         | dTDP-4-dehydrohamnose reductase                                                                                                                                                                                |
| TS29Fae00697 CDS CDS   | 1.0  | 48.0  | 0.1  | M | COG0707                         | UDP-N-acetylglucosamine:LPS N-acetylglucosamine transferase                                                                                                                                                    |
| TS29Rum21239 CDS CDS   | 3.9  | 187.0 | 0.1  | M | COG4932                         | Predicted outer membrane protein                                                                                                                                                                               |
| TS29RumUnc0709 CDS CDS | 1.0  | 50.0  | 0.1  | M | COG0739 COG3883 COG2951 COG0791 | Membrane proteins related to metalloendopeptidases Uncharacterized protein conserved in bacteria Membrane-bound lytic murein transglycosylase B Cell wall-associated hydrolases (invasion-associated proteins) |
| TS28Rum02251 CDS CDS   | 1.5  | 75.5  | 0.1  | M | COG4932                         | Predicted outer membrane protein                                                                                                                                                                               |
| TS29Bac00439 CDS CDS   | 0.3  | 16.8  | 0.1  | M | COG1696                         | Predicted membrane protein involved in D-alanine export                                                                                                                                                        |
| TS28Bif5294 CDS CDS    | 1.2  | 59.0  | 0.1  | M | COG1088                         | dTDP-D-glucose 4,6-dehydratase                                                                                                                                                                                 |
| TS29Bif0922 CDS CDS    | 1.2  | 59.0  | 0.1  | M | COG1088                         | dTDP-D-glucose 4,6-dehydratase                                                                                                                                                                                 |
| TS29Rum11714 CDS CDS   | 2.0  | 101.5 | 0.1  | M | COG0741 COG3757                 | Soluble lytic murein transglycosylase and related regulatory proteins (some contain LysM/invasin domains) Lysozyme M1 (1,4-beta-N-acetylmuramidase)                                                            |
| Ccom1804 CDS CDS       | 0.3  | 12.8  | 0.1  | M | COG4932                         | Predicted outer membrane protein                                                                                                                                                                               |
| TS29RumUnc1441 CDS CDS | 1.5  | 76.5  | 0.1  | M | COG4932                         | Predicted outer membrane protein                                                                                                                                                                               |
| TS29Bif2467 CDS CDS    | 1.3  | 63.9  | 0.1  | M | COG0769 COG0770                 | UDP-N-acetylmuramyl tripeptide synthase UDP-N-acetylmuramyl pentapeptide synthase                                                                                                                              |
| TS29Bac09108 CDS CDS   | 0.3  | 13.0  | 0.1  | M | COG0739 COG3883 COG5412 COG0791 | Membrane proteins related to metalloendopeptidases Uncharacterized protein conserved in bacteria Phage-related protein Cell wall-associated hydrolases (invasion-associated proteins)                          |
| TS29Fae05357 CDS CDS   | 0.5  | 26.0  | 0.1  | M | COG0796                         | Glutamate racemase                                                                                                                                                                                             |
| TS29Fae08641 CDS CDS   | 1.0  | 52.5  | 0.1  | M | COG0463                         | Glycosyltransferases involved in cell wall biogenesis                                                                                                                                                          |
| TS29RumUnc1680 CDS CDS | 1.0  | 53.0  | 0.1  | M | COG0768                         | Cell division protein FtsI/penicillin-binding protein 2                                                                                                                                                        |
| TS29Bif3436 CDS CDS    | 1.8  | 93.5  | 0.1  | M | COG0787 COG0802                 | Alanine racemase Predicted ATPase or kinase                                                                                                                                                                    |
| Caer1588 CDS CDS       | 1.0  | 54.0  | 0.1  | M | COG1209                         | dTDP-glucose pyrophosphorylase                                                                                                                                                                                 |
| TS28Fae16711 CDS CDS   | 0.5  | 27.0  | 0.1  | M | COG1686                         | D-alanyl-D-alanine carboxypeptidase                                                                                                                                                                            |
| TS29Fae08152 CDS CDS   | 1.5  | 81.0  | 0.1  | M | COG0787                         | Alanine racemase                                                                                                                                                                                               |
| TS29Bac01443 CDS CDS   | 0.1  | 6.0   | 0.1  | M | COG2885                         | Outer membrane protein and related peptidoglycan-associated (lipo)proteins                                                                                                                                     |
| Bpse0004 CDS CDS       | 0.3  | 18.2  | 0.1  | M | COG0449                         | Glucosamine 6-phosphate synthetase, contains amidotransferase and phosphosugar isomerase domains                                                                                                               |
| TS28Bif5291 CDS CDS    | 1.0  | 57.5  | 0.1  | M | COG1209                         | dTDP-glucose pyrophosphorylase                                                                                                                                                                                 |
| TS29Bif0924 CDS CDS    | 1.0  | 57.5  | 0.1  | M | COG1209                         | dTDP-glucose pyrophosphorylase                                                                                                                                                                                 |
| TS28Bif3454 CDS CDS    | 0.3  | 14.5  | 0.1  | M | COG0770                         | UDP-N-acetylmuramyl tripeptide synthase                                                                                                                                                                        |
| TS29Fae03175 CDS CDS   | 1.5  | 87.0  | 0.1  | M | COG0438                         | Glycosyltransferase                                                                                                                                                                                            |
| TS29Fae08564 CDS CDS   | 1.5  | 87.0  | 0.1  | M | COG0769 COG0770                 | UDP-N-acetylmuramyl tripeptide synthase UDP-N-acetylmuramyl pentapeptide synthase                                                                                                                              |
| TS29Bif2272 CDS CDS    | 0.5  | 29.0  | 0.1  | M | COG0773                         | UDP-N-acetylmuramate-alanine ligase                                                                                                                                                                            |
| TS29Bif0622 CDS CDS    | 1.5  | 88.5  | 0.1  | M | COG5009 COG0744                 | Membrane carboxypeptidase penicillin-binding protein Membrane carboxypeptidase (penicillin-binding protein)                                                                                                    |
| TS28Bif1145 CDS CDS    | 1.5  | 88.5  | 0.1  | M | COG5009 COG0744                 | Membrane carboxypeptidase penicillin-binding protein Membrane carboxypeptidase (penicillin-binding protein)                                                                                                    |
| TS29RumUnc1673 CDS CDS | 1.0  | 60.0  | 0.1  | M | COG1368                         | Phosphoglycerol transferase and related proteins, alkaline phosphatase superfamily                                                                                                                             |
| TS28Fae21403 CDS CDS   | 0.5  | 30.5  | 0.1  | M | COG1089                         | GDP-D-mannose dehydratase                                                                                                                                                                                      |
| TS29Col0684 CDS CDS    | 0.5  | 31.0  | 0.1  | M | COG0812                         | UDP-N-acetylmuramate dehydrogenase                                                                                                                                                                             |
| TS29Bif1539 CDS CDS    | 0.3  | 20.7  | 0.1  | M | COG0449                         | Glucosamine 6-phosphate synthetase, contains amidotransferase and phosphosugar isomerase domains                                                                                                               |
| TS29Fae07271 CDS CDS   | 9.0  | 564.3 | 0.1  | M | COG4932                         | Predicted outer membrane protein                                                                                                                                                                               |
| TS29Fae10170 CDS CDS   | 1.0  | 63.0  | 0.1  | M | COG1004                         | Predicted UDP-glucose 6-dehydrogenase                                                                                                                                                                          |
| TS28Rum14365 CDS CDS   | 0.5  | 32.5  | 0.1  | M | COG1696                         | Predicted membrane protein involved in D-alanine export                                                                                                                                                        |
| TS28Rum11600 CDS CDS   | 0.5  | 32.7  | 0.1  | M | COG4932                         | Predicted outer membrane protein                                                                                                                                                                               |
| Clep1819 CDS CDS       | 0.2  | 11.0  | 0.1  | M | COG4886 COG3209 COG5276         | Leucine-rich repeat (LRR) protein Rhs family protein Uncharacterized conserved protein                                                                                                                         |
| TS29Rum20806 CDS CDS   | 1.0  | 68.0  | 0.1  | M | COG3940 COG5520                 | Predicted beta-xylosidase O-Glycosyl hydrolase                                                                                                                                                                 |
| TS29Fae09858 CDS CDS   | 1.0  | 70.0  | 0.1  | M | COG1876                         | D-alanyl-D-alanine carboxypeptidase                                                                                                                                                                            |
| TS29Rum00488 CDS CDS   | 0.5  | 35.5  | 0.1  | M | COG1898                         | dTDP-4-dehydrohamnose 3,5-epimerase and related enzymes                                                                                                                                                        |
| TS29Col0670 CDS CDS    | 0.5  | 37.0  | 0.1  | M | COG3409                         | Putative peptidoglycan-binding domain-containing protein                                                                                                                                                       |
| TS29Bif1172 CDS CDS    | 1.0  | 77.7  | 0.1  | M | COG5009 COG0744                 | Membrane carboxypeptidase penicillin-binding protein Membrane carboxypeptidase (penicillin-binding protein)                                                                                                    |
| TS29Fae08522 CDS CDS   | 1.5  | 117.5 | 0.1  | M | COG0449                         | Glucosamine 6-phosphate synthetase, contains amidotransferase and phosphosugar isomerase domains                                                                                                               |
| TS29Bac04286 CDS CDS   | 0.3  | 27.0  | 0.1  | M | COG0438 COG1216                 | Glycosyltransferase Predicted glycosyltransferases                                                                                                                                                             |
| CspSS23032 CDS CDS     | 0.3  | 20.3  | 0.1  | M | COG4932                         | Predicted outer membrane protein                                                                                                                                                                               |
| TS29Fae08263 CDS CDS   | 0.5  | 41.3  | 0.1  | M | COG0463                         | Glycosyltransferases involved in cell wall biogenesis                                                                                                                                                          |
| TS29Rum16612 CDS CDS   | 1.0  | 84.0  | 0.1  | M | COG0768                         | Cell division protein FtsI/penicillin-binding protein 2                                                                                                                                                        |
| TS29Rum02620 CDS CDS   | 0.2  | 17.0  | 0.1  | M | COG1088                         | dTDP-D-glucose 4,6-dehydratase                                                                                                                                                                                 |
| TS29Fae06331 CDS CDS   | 0.5  | 43.0  | 0.1  | M | COG1083                         | CMP-N-acetylneuraminic acid synthetase                                                                                                                                                                         |
| TS29Rum17185 CDS CDS   | 0.5  | 44.5  | 0.1  | M | COG1696                         | Predicted membrane protein involved in D-alanine export                                                                                                                                                        |
| TS29Bif383 CDS CDS     | 1.0  | 92.7  | 0.0  | M | COG0438                         | Glycosyltransferase                                                                                                                                                                                            |
| TS29Rum20318 CDS CDS   | 0.5  | 50.0  | 0.0  | M | COG0562                         | UDP-galactopyranose mutase                                                                                                                                                                                     |
| TS28Bif4905 CDS CDS    | 0.5  | 50.3  | 0.0  | M | COG0449                         | Glucosamine 6-phosphate synthetase, contains amidotransferase and phosphosugar isomerase domains                                                                                                               |
| Ehal1311 CDS CDS       | 0.3  | 35.5  | 0.0  | M | COG3049                         | Penicillin V acylase and related amidases                                                                                                                                                                      |
| TS28Fae18189 CDS CDS   | 0.3  | 35.5  | 0.0  | M | COG0275                         | Predicted S-adenosylmethionine-dependent methyltransferase involved in cell envelope biogenesis                                                                                                                |
| TS28Dor2628 CDS CDS    | 2.0  | 217.3 | 0.0  | M | COG4886 COG3209 COG5276         | Leucine-rich repeat (LRR) protein Rhs family protein Uncharacterized conserved protein                                                                                                                         |
| TS29Bif0923 CDS CDS    | 1.0  | 109.0 | 0.0  | M | COG1091 COG1898                 | dTDP-4-dehydrohamnose reductase dTDP-4-dehydrohamnose 3,5-epimerase and related enzymes                                                                                                                        |
| Robe2641 CDS CDS       | 1.0  | 110.2 | 0.0  | M | COG4932                         | Predicted outer membrane protein                                                                                                                                                                               |

|                                 |     |       |      |     |                                 |                                                                                                                                                                                                                         |
|---------------------------------|-----|-------|------|-----|---------------------------------|-------------------------------------------------------------------------------------------------------------------------------------------------------------------------------------------------------------------------|
| TS29Fae09122 CDS CDS            | 1.0 | 112.2 | 0.0  | M   | COG0739 COG3883 COG2951 COG0791 | Membrane proteins related to metalloendopeptidases Uncharacterized protein conserved in bacteria Membrane-bound lytic murein transglycosylase B Cell wall-associated hydrolases (invasion-associated proteins)          |
| TS29Rum21218 CDS CDS            | 0.3 | 37.7  | 0.0  | M   | COG1686                         | D-alanyl-D-alanine carboxypeptidase                                                                                                                                                                                     |
| TS29Dor2226 CDS CDS             | 2.0 | 229.3 | 0.0  | M   | COG4886 COG3209 COG5276         | Leucine-rich repeat (LRR) protein Rhs family protein Uncharacterized conserved protein                                                                                                                                  |
| CspM6211847 CDS CDS             | 0.2 | 25.5  | 0.0  | M   | COG0741 COG3757 COG0791         | Soluble lytic murein transglycosylase and related regulatory proteins (some contain LysM/invasin domains) Lysozyme M1 (1,4-beta-N-acetylmuramidase) Cell wall-associated hydrolases (invasion-associated proteins)      |
| Cnex2289 CDS CDS                | 0.2 | 25.5  | 0.0  | M   | COG0741 COG3757 COG0791         | Soluble lytic murein transglycosylase and related regulatory proteins (some contain LysM/invasin domains) Lysozyme M1 (1,4-beta-N-acetylmuramidase) Cell wall-associated hydrolases (invasion-associated proteins)      |
| Dfor2036 CDS CDS                | 0.2 | 25.5  | 0.0  | M   | COG0741 COG3757 COG0791         | Soluble lytic murein transglycosylase and related regulatory proteins (some contain LysM/invasin domains) Lysozyme M1 (1,4-beta-N-acetylmuramidase) Cell wall-associated hydrolases (invasion-associated proteins)      |
| Ceut2220 CDS CDS                | 0.2 | 25.5  | 0.0  | M   | COG0741 COG3757 COG0791         | Soluble lytic murein transglycosylase and related regulatory proteins (some contain LysM/invasin domains) Lysozyme M1 (1,4-beta-N-acetylmuramidase) Cell wall-associated hydrolases (invasion-associated proteins)      |
| Rbro1720 CDS CDS                | 0.2 | 25.5  | 0.0  | M   | COG0741 COG3757 COG0791         | Soluble lytic murein transglycosylase and related regulatory proteins (some contain LysM/invasin domains) Lysozyme M1 (1,4-beta-N-acetylmuramidase) Cell wall-associated hydrolases (invasion-associated proteins)      |
| TS29Rum04257 CDS CDS            | 0.3 | 30.0  | 0.0  | M   | COG1087                         | UDP-glucose 4-epimerase                                                                                                                                                                                                 |
| TS29Rum00441 CDS CDS            | 3.0 | 362.0 | 0.0  | M   | COG4886 COG3209 COG5276         | Leucine-rich repeat (LRR) protein Rhs family protein Uncharacterized conserved protein                                                                                                                                  |
| Ccom1803 CDS CDS                | 0.3 | 30.2  | 0.0  | M   | COG4932                         | Predicted outer membrane protein                                                                                                                                                                                        |
| TS28Eub6359 CDS CDS             | 0.3 | 41.0  | 0.0  | M   | COG0741 COG3757                 | Soluble lytic murein transglycosylase and related regulatory proteins (some contain LysM/invasin domains) Lysozyme M1 (1,4-beta-N-acetylmuramidase)                                                                     |
| TS29Rum21227 CDS CDS            | 0.3 | 41.0  | 0.0  | M   | COG0741 COG3757                 | Soluble lytic murein transglycosylase and related regulatory proteins (some contain LysM/invasin domains) Lysozyme M1 (1,4-beta-N-acetylmuramidase)                                                                     |
| Acae2248 CDS CDS                | 0.2 | 27.0  | 0.0  | M   | COG0741 COG3757 COG0791         | Soluble lytic murein transglycosylase and related regulatory proteins (some contain LysM/invasin domains) Lysozyme M1 (1,4-beta-N-acetylmuramidase) Cell wall-associated hydrolases (invasion-associated proteins)      |
| TS28Rum11599 CDS CDS            | 0.5 | 64.5  | 0.0  | M   | COG4932                         | Predicted outer membrane protein                                                                                                                                                                                        |
| TS28Bi5307 CDS CDS              | 1.0 | 129.5 | 0.0  | M   | COG2148 COG0707                 | Sugar transferases involved in lipopolysaccharide synthesis UDP-N-acetylglucosamine:1-PS N-acetylglucosamine transferase                                                                                                |
| CspSS20003 CDS CDS              | 0.3 | 33.5  | 0.0  | M   | COG4932                         | Predicted outer membrane protein                                                                                                                                                                                        |
| TS29Bi3514 CDS CDS              | 0.5 | 78.1  | 0.0  | M   | COG5009 COG0744                 | Membrane carboxypeptidase/penicillin-binding protein Membrane carboxypeptidase (penicillin-binding protein)                                                                                                             |
| TS28Bi4472 CDS CDS              | 0.3 | 54.7  | 0.0  | M   | COG3409                         | Putative peptidoglycan-binding domain-containing protein                                                                                                                                                                |
| TS29Rum15667 CDS CDS            | 1.0 | 167.0 | 0.0  | M   | COG5283 COG0741                 | Phage-related tail protein Soluble lytic murein transglycosylase and related regulatory proteins (some contain LysM/invasin domains)                                                                                    |
| Csci3148 CDS CDS                | 0.1 | 15.3  | 0.0  | M   | COG0741 COG3757 COG0791         | Soluble lytic murein transglycosylase and related regulatory proteins (some contain LysM/invasin domains) Lysozyme M1 (1,4-beta-N-acetylmuramidase) Cell wall-associated hydrolases (invasion-associated proteins)      |
| Acol2776 CDS CDS                | 0.1 | 15.5  | 0.0  | M   | COG0741 COG3757 COG0791         | Soluble lytic murein transglycosylase and related regulatory proteins (some contain LysM/invasin domains) Lysozyme M1 (1,4-beta-N-acetylmuramidase) Cell wall-associated hydrolases (invasion-associated proteins)      |
| TS29Bi3866 CDS CDS              | 0.5 | 86.3  | 0.0  | M   | COG1087                         | UDP-glucose 4-epimerase                                                                                                                                                                                                 |
| Cbo3084 CDS CDS                 | 0.1 | 15.9  | 0.0  | M   | COG0741 COG3757 COG0791         | Soluble lytic murein transglycosylase and related regulatory proteins (some contain LysM/invasin domains) Lysozyme M1 (1,4-beta-N-acetylmuramidase) Cell wall-associated hydrolases (invasion-associated proteins)      |
| TS29Bi0527 CDS CDS              | 0.5 | 88.0  | 0.0  | M   | COG0768                         | Cell division protein FtsI/penicillin-binding protein 2                                                                                                                                                                 |
| TS28Bi4496 CDS CDS              | 0.5 | 88.0  | 0.0  | M   | COG0768                         | Cell division protein FtsI/penicillin-binding protein 2                                                                                                                                                                 |
| TS29Bi3469 CDS CDS              | 0.5 | 92.3  | 0.0  | M   | COG0449                         | Glucosamine 6-phosphate synthetase, contains amidotransferase and phosphosugar isomerase domains                                                                                                                        |
| TS28Bi4957 CDS CDS              | 0.5 | 95.1  | 0.0  | M   | COG5009 COG0744                 | Membrane carboxypeptidase/penicillin-binding protein Membrane carboxypeptidase (penicillin-binding protein)                                                                                                             |
| TS29Rum19621 CDS CDS            | 1.2 | 221.8 | 0.0  | M   | COG4932                         | Predicted outer membrane protein                                                                                                                                                                                        |
| TS29RumUnc1573 CDS CDS          | 1.0 | 218.0 | 0.0  | M   | COG4932 COG0739                 | Predicted outer membrane protein Membrane proteins related to metalloendopeptidases                                                                                                                                     |
| TS28Rum13909 CDS CDS            | 0.3 | 82.5  | 0.0  | M   | COG4932                         | Predicted outer membrane protein                                                                                                                                                                                        |
| Dlon1668 CDS CDS                | 0.3 | 84.5  | 0.0  | M   | COG4932                         | Predicted outer membrane protein                                                                                                                                                                                        |
| TS29Bi3594 CDS CDS              | 0.5 | 127.0 | 0.0  | M   | COG0463                         | Glycosyltransferases involved in cell wall biogenesis                                                                                                                                                                   |
| TS29Bi2829 CDS CDS              | 0.2 | 51.5  | 0.0  | M   | COG0682                         | Prolipoprotein diacylglyceryltransferase                                                                                                                                                                                |
| TS29Bi3079 CDS CDS              | 0.3 | 80.6  | 0.0  | M   | COG1207                         | N-acetylglucosamine-1-phosphate uridylyltransferase (contains nucleotidyltransferase and I-patch acetyltransferase domains)                                                                                             |
| TS29Bi2420 CDS CDS              | 0.3 | 98.5  | 0.0  | M   | COG0770                         | UDP-N-acetylmuramyl pentapeptide synthase                                                                                                                                                                               |
| TS29Bi3129 CDS CDS              | 1.0 | 476.0 | 0.0  | M   | COG4932                         | Predicted outer membrane protein                                                                                                                                                                                        |
| TS29Bi0506 CDS CDS              | 0.3 | 178.0 | 0.0  | M   | COG3409                         | Putative peptidoglycan-binding domain-containing protein                                                                                                                                                                |
| TS29Bi2418 CDS CDS              | 0.3 | 142.8 | 0.0  | M   | COG0768                         | Cell division protein FtsI/penicillin-binding protein 2                                                                                                                                                                 |
| TS28Fae15061 CDS CDS            | 4.0 | 1.0   | 18.2 | M D | COG3206 COG0489 COG3944 COG2148 | Uncharacterized protein involved in exopolysaccharide biosynthesis ATPases involved in chromosome partitioning Capsular polysaccharide biosynthesis protein Sugar transferases involved in lipopolysaccharide synthesis |
| Buni2991 CDS CDS                | 2.7 | 1.2   | 10.4 | M D | COG0739 COG4942                 | Membrane proteins related to metalloendopeptidases Membrane-bound metalloendopeptidase                                                                                                                                  |
| TS28Bac1582 CDS CDS             | 2.7 | 1.2   | 10.4 | M D | COG0739 COG4942                 | Membrane proteins related to metalloendopeptidases Membrane-bound metalloendopeptidase                                                                                                                                  |
| TS29Bif0926 CDS CDS             | 0.8 | 75.0  | 0.1  | M D | COG3206 COG0489 COG3944 COG2148 | Uncharacterized protein involved in exopolysaccharide biosynthesis ATPases involved in chromosome partitioning Capsular polysaccharide biosynthesis protein Sugar transferases involved in lipopolysaccharide synthesis |
| TS28Bif5289 CDS CDS             | 0.8 | 110.0 | 0.0  | M D | COG3206 COG0489 COG3944 COG2148 | Uncharacterized protein involved in exopolysaccharide biosynthesis ATPases involved in chromosome partitioning Capsular polysaccharide biosynthesis protein Sugar transferases involved in lipopolysaccharide synthesis |
| BLD0562 CDS Glycosyltransferase | 2.3 | 0.3   | 40.9 | M G | COG0438 COG1543 COG0561 COG0297 | Glycosyltransferase Uncharacterized conserved protein Predicted hydrolases of the HAD superfamily Glcgen synthase                                                                                                       |
| BactD10924 CDS CDS              | 5.3 | 1.0   | 23.9 | M G | COG0438 COG0058                 | Glycosyltransferase Glucan phosphorylase                                                                                                                                                                                |

|                                     |       |      |      |         |                                                                                                        |                                                                                                                                                                                                                                                                                                                                                                                                                                                                                                                                                                                                                                                                                                                      |
|-------------------------------------|-------|------|------|---------|--------------------------------------------------------------------------------------------------------|----------------------------------------------------------------------------------------------------------------------------------------------------------------------------------------------------------------------------------------------------------------------------------------------------------------------------------------------------------------------------------------------------------------------------------------------------------------------------------------------------------------------------------------------------------------------------------------------------------------------------------------------------------------------------------------------------------------------|
| Cbol4450 CDS CDS                    | 9.0   | 2.0  | 20.4 | M G     | COG0451                                                                                                | Nucleoside-diphosphate-sugar epimerases                                                                                                                                                                                                                                                                                                                                                                                                                                                                                                                                                                                                                                                                              |
| Bum1607 CDS CDS                     | 2.0   | 0.7  | 13.6 | M G     | COG1086                                                                                                | Predicted nucleoside-diphosphate sugar epimerases                                                                                                                                                                                                                                                                                                                                                                                                                                                                                                                                                                                                                                                                    |
| Bste1255 CDS CDS                    | 7.9   | 3.3  | 10.8 | M G     | COG0438 COG0058                                                                                        | Glycosyltransferase Glucan phosphorylase                                                                                                                                                                                                                                                                                                                                                                                                                                                                                                                                                                                                                                                                             |
| BFych463854 CDS glycosyltransferase | 1.5   | 0.5  | 13.6 | M I     | COG0463 COG1887<br>COG1216 COG1835                                                                     | Glycosyltransferases involved in cell wall biogenesis Putative glycosyl/glycerophosphate transferases involved in teichoic acid biosynthesis TagF/TagB/EpsJ/RodC Predicted glycosyltransferases Predicted acyltransferases                                                                                                                                                                                                                                                                                                                                                                                                                                                                                           |
| TS29Fae09887 CDS CDS                | 0.5   | 62.5 | 0.0  | M I     | COG0463 COG1216<br>COG1835 COG1887<br>COG3754                                                          | Glycosyltransferases involved in cell wall biogenesis Predicted glycosyltransferases Predicted acyltransferases Putative glycosyl/glycerophosphate transferases involved in teichoic acid biosynthesis TagF/TagB/EpsJ/RodC Lipopolysaccharide biosynthesis protein                                                                                                                                                                                                                                                                                                                                                                                                                                                   |
| TS28Eub1969 CDS CDS                 | 6.8   | 2.5  | 12.4 | M I J   | COG0539 COG0761                                                                                        | Ribosomal protein S1 Penicillin tolerance protein                                                                                                                                                                                                                                                                                                                                                                                                                                                                                                                                                                                                                                                                    |
| TS29Rum20296 CDS CDS                | 114.5 | 46.5 | 11.2 | M I J   | COG0539 COG0761                                                                                        | Ribosomal protein S1 Penicillin tolerance protein                                                                                                                                                                                                                                                                                                                                                                                                                                                                                                                                                                                                                                                                    |
| TS29Bif3204 CDS CDS                 | 1.6   | 82.6 | 0.1  | M I J   | COG0539 COG0761                                                                                        | Ribosomal protein S1 Penicillin tolerance protein                                                                                                                                                                                                                                                                                                                                                                                                                                                                                                                                                                                                                                                                    |
| TS28Bif4604 CDS CDS                 | 0.7   | 38.3 | 0.1  | M I J   | COG0539 COG0761                                                                                        | Ribosomal protein S1 Penicillin tolerance protein                                                                                                                                                                                                                                                                                                                                                                                                                                                                                                                                                                                                                                                                    |
| TS29Rum07198 CDS CDS                | 1.0   | 0.3  | 13.6 | M J     | COG0110 COG1208                                                                                        | Acetyltransferase (isoleucine patch superfamily) Nucleoside-diphosphate-sugar pyrophosphorylase involved in lipopolysaccharide biosynthesis translation initiation factor 2B, gamma/epsilon subunits (eIF-2Bgamma/eIF-2Bepsilon)                                                                                                                                                                                                                                                                                                                                                                                                                                                                                     |
| TS28Fae12337 CDS CDS                | 5.2   | 1.0  | 23.5 | M T     | COG0739 COG3883<br>COG3103 COG0791                                                                     | Membrane proteins related to metalloendopeptidases Uncharacterized protein conserved in bacteria SH3 domain protein Cell wall-associated hydrolases (invasion-associated proteins)                                                                                                                                                                                                                                                                                                                                                                                                                                                                                                                                   |
| TS29Rum19363 CDS CDS                | 1.3   | 62.5 | 0.1  | M T     | COG3409 COG1388<br>COG3883 COG3103<br>COG0791                                                          | Putative peptidoglycan-binding domain-containing protein FOG: LysM repeat Uncharacterized protein conserved in bacteria SH3 domain protein Cell wall-associated hydrolases (invasion-associated proteins)                                                                                                                                                                                                                                                                                                                                                                                                                                                                                                            |
| TS29Rum21247 CDS CDS                | 1.0   | 52.5 | 0.1  | M T     | COG0739 COG3409<br>COG1388 COG3883<br>COG2951 COG5412<br>COG3103 COG0791                               | Membrane proteins related to metalloendopeptidases Putative peptidoglycan-binding domain-containing protein FOG: LysM repeat Uncharacterized protein conserved in bacteria Membrane-bound lytic murein transglycosylase B Phage-related protein SH3 domain protein Cell wall-associated hydrolases (invasion-associated proteins)                                                                                                                                                                                                                                                                                                                                                                                    |
| TS29Fae06489 CDS CDS                | 0.3   | 22.8 | 0.0  | M T     | COG3409 COG1388<br>COG3883 COG3103<br>COG0791                                                          | Putative peptidoglycan-binding domain-containing protein FOG: LysM repeat Uncharacterized protein conserved in bacteria SH3 domain protein Cell wall-associated hydrolases (invasion-associated proteins)                                                                                                                                                                                                                                                                                                                                                                                                                                                                                                            |
| TS28Fae00439 CDS CDS                | 0.3   | 29.3 | 0.0  | M T     | COG3409 COG1388<br>COG3883 COG3103<br>COG0791                                                          | Putative peptidoglycan-binding domain-containing protein FOG: LysM repeat Uncharacterized protein conserved in bacteria SH3 domain protein Cell wall-associated hydrolases (invasion-associated proteins)                                                                                                                                                                                                                                                                                                                                                                                                                                                                                                            |
| Bum0764 CDS CDS                     | 4.4   | 0.5  | 40.1 | M U     | COG1538                                                                                                | Outer membrane protein                                                                                                                                                                                                                                                                                                                                                                                                                                                                                                                                                                                                                                                                                               |
| TS28Fae10606 CDS CDS                | 0.3   | 85.0 | 0.0  | M U T   | COG3409 COG1388<br>COG3451 COG3883<br>COG3103 COG0791                                                  | Putative peptidoglycan-binding domain-containing protein FOG: LysM repeat Type IV secretory pathway, VirB4 components Uncharacterized protein conserved in bacteria SH3 domain protein Cell wall-associated hydrolases (invasion-associated proteins)                                                                                                                                                                                                                                                                                                                                                                                                                                                                |
| Casp6307 CDS CDS                    | 6.0   | 1.0  | 27.2 | N       | COG5492                                                                                                | Bacterial surface proteins containing Ig-like domains                                                                                                                                                                                                                                                                                                                                                                                                                                                                                                                                                                                                                                                                |
| RintL10672 CDS CDS                  | 4.0   | 1.0  | 18.2 | N       | COG1843 COG1749<br>COG4786                                                                             | Flagellar hook capping protein Flagellar hook protein FlgE Flagellar basal body rod protein                                                                                                                                                                                                                                                                                                                                                                                                                                                                                                                                                                                                                          |
| Cbol5448 CDS CDS                    | 12.0  | 3.0  | 18.2 | N       | COG5492 COG5263                                                                                        | Bacterial surface proteins containing Ig-like domains FOG: Glucan-binding domain (YG repeat)                                                                                                                                                                                                                                                                                                                                                                                                                                                                                                                                                                                                                         |
| RintL11106 CDS CDS                  | 4.0   | 1.0  | 18.2 | N       | COG1344                                                                                                | Flagellin and related hook-associated proteins                                                                                                                                                                                                                                                                                                                                                                                                                                                                                                                                                                                                                                                                       |
| TS28Clo03935 CDS CDS                | 17.0  | 5.0  | 15.4 | N       | COG5492                                                                                                | Bacterial surface proteins containing Ig-like domains                                                                                                                                                                                                                                                                                                                                                                                                                                                                                                                                                                                                                                                                |
| TS29Rum12393 CDS CDS                | 1.0   | 51.0 | 0.1  | N       | COG3225                                                                                                | ABC-type uncharacterized transport system involved in gliding motility, auxiliary component                                                                                                                                                                                                                                                                                                                                                                                                                                                                                                                                                                                                                          |
| TS29Fae04131 CDS CDS                | 0.3   | 18.0 | 0.1  | N       | COG5651                                                                                                | PPE-repeat proteins                                                                                                                                                                                                                                                                                                                                                                                                                                                                                                                                                                                                                                                                                                  |
| TS29Rum11623 CDS CDS                | 1.0   | 65.0 | 0.1  | N       | COG5651                                                                                                | PPE-repeat proteins                                                                                                                                                                                                                                                                                                                                                                                                                                                                                                                                                                                                                                                                                                  |
| TS29Met0283 CDS CDS                 | 0.3   | 26.0 | 0.1  | N       | COG5651                                                                                                | PPE-repeat proteins                                                                                                                                                                                                                                                                                                                                                                                                                                                                                                                                                                                                                                                                                                  |
| TS28Dor2601 CDS CDS                 | 10.5  | 2.0  | 23.8 | N C L U | COG1156 COG1372<br>COG1157 COG0056                                                                     | Archaeal/vacuolar-type H <sup>+</sup> -ATPase subunit B Intein/homing endonuclease Flagellar biosynthesis/type III secretory pathway ATPase F0F1-type ATP synthase, alpha subunit                                                                                                                                                                                                                                                                                                                                                                                                                                                                                                                                    |
| TS28Met1777 CDS CDS                 | 4.9   | 1.0  | 23.2 | N C L U | COG1156 COG1372<br>COG1157 COG0055                                                                     | Archaeal/vacuolar-type H <sup>+</sup> -ATPase subunit B Intein/homing endonuclease Flagellar biosynthesis/type III secretory pathway ATPase F0F1-type ATP synthase, beta subunit                                                                                                                                                                                                                                                                                                                                                                                                                                                                                                                                     |
| TS29Par214 CDS CDS                  | 11.0  | 2.5  | 20.0 | N C L U | COG1156 COG1372<br>COG1157 COG0056                                                                     | Archaeal/vacuolar-type H <sup>+</sup> -ATPase subunit B Intein/homing endonuclease Flagellar biosynthesis/type III secretory pathway ATPase F0F1-type ATP synthase, alpha subunit                                                                                                                                                                                                                                                                                                                                                                                                                                                                                                                                    |
| TS28Rum07611 CDS CDS                | 7.5   | 2.5  | 13.6 | N C L U | COG1372 COG1157<br>COG1155 COG0055                                                                     | Intein/homing endonuclease Flagellar biosynthesis/type III secretory pathway ATPase Archaeal/vacuolar-type H <sup>+</sup> -ATPase subunit A F0F1-type ATP synthase, beta subunit                                                                                                                                                                                                                                                                                                                                                                                                                                                                                                                                     |
| TS28Met1778 CDS CDS                 | 4.5   | 1.9  | 10.8 | N C L U | COG1372 COG1157<br>COG1155 COG0055                                                                     | Intein/homing endonuclease Flagellar biosynthesis/type III secretory pathway ATPase Archaeal/vacuolar-type H <sup>+</sup> -ATPase subunit A F0F1-type ATP synthase, beta subunit                                                                                                                                                                                                                                                                                                                                                                                                                                                                                                                                     |
| Bryfor1729 CDS CDS                  | 6.0   | 2.0  | 13.6 | N G     | COG5492 COG1501                                                                                        | Bacterial surface proteins containing Ig-like domains Alpha-glucosidases, family 31 of glycosyl hydrolases                                                                                                                                                                                                                                                                                                                                                                                                                                                                                                                                                                                                           |
| TS28Rum05733 CDS CDS                | 8.0   | 1.0  | 36.3 | N K T   | COG0784 COG2197<br>COG2114 COG0835                                                                     | FOG: CheY-like receiver Response regulator containing a CheY-like receiver domain and an HTH DNA-binding domain Adenylate cyclase, family 3 (some proteins contain HAMP domain) Chemotaxis signal transduction protein                                                                                                                                                                                                                                                                                                                                                                                                                                                                                               |
| TS29Rum17966 CDS CDS                | 0.5   | 24.0 | 0.1  | N K T   | COG4753 COG2207<br>COG0784 COG3279<br>COG4936 COG2197<br>COG2201                                       | Response regulator containing CheY-like receiver domain and AraC-type DNA-binding domain AraC-type DNA-binding domain-containing proteins FOG: CheY-like receiver Response regulator of the LytR/AlgR family Predicted sensor domain Response regulator containing a CheY-like receiver domain and an HTH DNA-binding domain Chemotaxis response regulator containing a CheY-like receiver domain and a methyltransferase domain                                                                                                                                                                                                                                                                                     |
| TS29Rum16752 CDS CDS                | 1.0   | 61.0 | 0.1  | N K T   | COG0642 COG4753<br>COG2207 COG2204<br>COG0784 COG3279<br>COG4936 COG5001<br>COG2197 COG2201<br>COG1776 | Signal transduction histidine kinase Response regulator containing CheY-like receiver domain and AraC-type DNA-binding domain AraC-type DNA-binding domain-containing proteins Response regulator containing CheY-like receiver, AAA-type ATPase, and DNA-binding domains FOG: CheY-like receiver Response regulator of the LytR/AlgR family Predicted sensor domain Predicted signal transduction protein containing a membrane domain, an EAL and a GGDEF domain Response regulator containing a CheY-like receiver domain and an HTH DNA-binding domain Chemotaxis response regulator containing a CheY-like receiver domain and a methyltransferase domain Chemotaxis protein CheC, inhibitor of MCP methylation |
| Msm1740101 CDS CDS                  | 4.1   | 0.2  | 93.1 | N L C U | COG1372 COG0055<br>COG1156 COG1157                                                                     | Intein/homing endonuclease F0F1-type ATP synthase, beta subunit Archaeal/vacuolar-type H <sup>+</sup> -ATPase subunit B Flagellar biosynthesis/type III secretory pathway ATPase                                                                                                                                                                                                                                                                                                                                                                                                                                                                                                                                     |
| Aput2338 CDS CDS                    | 14.0  | 2.0  | 31.8 | N L C U | COG1372 COG0055<br>COG1157 COG1155                                                                     | Intein/homing endonuclease F0F1-type ATP synthase, beta subunit Flagellar biosynthesis/type III secretory pathway ATPase Archaeal/vacuolar-type H <sup>+</sup> -ATPase subunit A                                                                                                                                                                                                                                                                                                                                                                                                                                                                                                                                     |



|                        |         |      |         |         |                                         |                                                                                                                                                                                                            |
|------------------------|---------|------|---------|---------|-----------------------------------------|------------------------------------------------------------------------------------------------------------------------------------------------------------------------------------------------------------|
| Msmi751598 CDS CDS     | 4.9     | 1.0  | 23.2    | N L C U | COG1372 COG0055 COG1156 COG1157         | Intein/homing endonuclease F0F1-type ATP synthase, beta subunit Archaeal/vacuolar-type H+-ATPase subunit B Flagellar biosynthesis/type III secretory pathway ATPase                                        |
| Msmi751597 CDS CDS     | 4.5     | 0.9  | 22.9    | N L C U | COG1372 COG0055 COG1157 COG1155         | Intein/homing endonuclease F0F1-type ATP synthase, beta subunit Flagellar biosynthesis/type III secretory pathway ATPase Archaeal/vacuolar-type H+-ATPase subunit A                                        |
| Rumhyd1739 CDS CDS     | 5.0     | 1.0  | 22.7    | N L C U | COG1372 COG0055 COG0056 COG1156 COG1157 | Intein/homing endonuclease F0F1-type ATP synthase, alpha subunit F0F1-type ATP synthase, alpha subunit Archaeal/vacuolar-type H+-ATPase subunit B Flagellar biosynthesis/type III secretory pathway ATPase |
| BactD10928 CDS CDS     | 2.5     | 0.5  | 22.7    | N L C U | COG1372 COG0055 COG0056 COG1156 COG1157 | Intein/homing endonuclease F0F1-type ATP synthase, beta subunit F0F1-type ATP synthase, alpha subunit Archaeal/vacuolar-type H+-ATPase subunit B Flagellar biosynthesis/type III secretory pathway ATPase  |
| Rumhyd1738 CDS CDS     | 4.0     | 1.0  | 18.2    | N L C U | COG1372 COG0055 COG1157 COG1155         | Intein/homing endonuclease F0F1-type ATP synthase, beta subunit Flagellar biosynthesis/type III secretory pathway ATPase Archaeal/vacuolar-type H+-ATPase subunit A                                        |
| Dfor1023 CDS CDS       | 8.5     | 3.0  | 12.9    | N L C U | COG1372 COG0056 COG1156 COG1157         | Intein/homing endonuclease F0F1-type ATP synthase, alpha subunit Archaeal/vacuolar-type H+-ATPase subunit B Flagellar biosynthesis/type III secretory pathway ATPase                                       |
| Dfor1022 CDS CDS       | 7.8     | 3.0  | 11.9    | N L C U | COG1372 COG1157 COG1155                 | Intein/homing endonuclease Flagellar biosynthesis/type III secretory pathway ATPase Archaeal/vacuolar-type H+-ATPase subunit A                                                                             |
| Msmi740100 CDS CDS     | 4.2     | 1.9  | 10.0    | N L C U | COG1372 COG0055 COG1157 COG1155         | Intein/homing endonuclease F0F1-type ATP synthase, beta subunit Flagellar biosynthesis/type III secretory pathway ATPase Archaeal/vacuolar-type H+-ATPase subunit A                                        |
| Cbo14151 CDS CDS       | 0.3     | 13.0 | 0.1     | N U     | COG1298 COG4789                         | Flagellar biosynthesis pathway, component FliA Type III secretory pathway, component EscV                                                                                                                  |
| TS28Rum00969 CDS CDS   | 1.0     | 63.0 | 0.1     | N U     | COG4962 COG0630                         | Flp plus assembly protein, ATPase CpaF Type IV secretory pathway, VirB11 components, and related ATPases involved in archaeal flagella biosynthesis                                                        |
| Rumhyd1374 CDS CDS     | 10.0    | 2.0  | 22.7    | N U W   | COG5492 COG5295                         | Bacterial surface proteins containing Ig-like domains Autotransporter adhesin                                                                                                                              |
| TS28Bac5242 CDS CDS    | 77.3    | 0.3  | 1,053.2 | O       | COG0459                                 | Chaperonin GroEL (HSP60 family)                                                                                                                                                                            |
| Bova3457 CDS CDS       | 108.3   | 0.5  | 983.8   | O       | COG0459                                 | Chaperonin GroEL (HSP60 family)                                                                                                                                                                            |
| TS29Bac10141 CDS CDS   | 1,471.7 | 12.5 | 534.5   | O       | COG0071                                 | Molecular chaperone (small heat shock protein)                                                                                                                                                             |
| BactD11031 CDS CDS     | 164.1   | 1.5  | 496.6   | O       | COG0459                                 | Chaperonin GroEL (HSP60 family)                                                                                                                                                                            |
| TS28Bac5566 CDS CDS    | 36.0    | 0.3  | 490.3   | O       | COG0265                                 | Trypsin-like serine proteases, typically periplasmic, contain C-terminal PDZ domain                                                                                                                        |
| Buni3363 CDS CDS       | 36.0    | 0.3  | 490.3   | O       | COG0265                                 | Trypsin-like serine proteases, typically periplasmic, contain C-terminal PDZ domain                                                                                                                        |
| Aput0213 CDS CDS       | 252.8   | 3.0  | 382.6   | O       | COG0443                                 | Molecular chaperone                                                                                                                                                                                        |
| Buni1622 CDS CDS       | 40.2    | 0.5  | 365.0   | O       | COG0484                                 | DnaJ-class molecular chaperone with C-terminal Zn finger domain                                                                                                                                            |
| Bxy10114 CDS CDS       | 44.7    | 0.6  | 347.8   | O       | COG0071                                 | Molecular chaperone (small heat shock protein)                                                                                                                                                             |
| Bfin1972 CDS CDS       | 41.2    | 0.6  | 320.6   | O       | COG0071                                 | Molecular chaperone (small heat shock protein)                                                                                                                                                             |
| Buni3583 CDS CDS       | 229.2   | 3.5  | 297.3   | O       | COG0542                                 | ATPases with chaperone activity, ATP-binding subunit                                                                                                                                                       |
| BactD13252 CDS CDS     | 65.2    | 1.0  | 295.9   | O       | COG0484                                 | DnaJ-class molecular chaperone with C-terminal Zn finger domain                                                                                                                                            |
| TS29Bac03134 CDS CDS   | 505.2   | 8.0  | 286.7   | O       | COG0459                                 | Chaperonin GroEL (HSP60 family)                                                                                                                                                                            |
| Buni0874 CDS CDS       | 175.8   | 3.3  | 239.5   | O       | COG0459                                 | Chaperonin GroEL (HSP60 family)                                                                                                                                                                            |
| TS28Bac1430 CDS CDS    | 69.7    | 1.3  | 237.2   | O       | COG0326                                 | Molecular chaperone, HSP90 family                                                                                                                                                                          |
| FpraM2121131 CDS CDS   | 24.6    | 0.5  | 223.2   | O       | COG0459                                 | Chaperonin GroEL (HSP60 family)                                                                                                                                                                            |
| BactD10743 CDS CDS     | 31.9    | 0.7  | 217.4   | O       | COG0443                                 | Molecular chaperone                                                                                                                                                                                        |
| BactD21332 CDS CDS     | 20.7    | 0.5  | 188.2   | O       | COG0459                                 | Chaperonin GroEL (HSP60 family)                                                                                                                                                                            |
| TS28Bac6142 CDS CDS    | 136.6   | 3.5  | 177.1   | O       | COG0542                                 | ATPases with chaperone activity, ATP-binding subunit                                                                                                                                                       |
| TS29Bac00073 CDS CDS   | 286.1   | 7.5  | 173.2   | O       | COG0443                                 | Molecular chaperone                                                                                                                                                                                        |
| TS29Bac03135 CDS CDS   | 389.5   | 11.3 | 156.0   | O       | COG0459                                 | Chaperonin GroEL (HSP60 family)                                                                                                                                                                            |
| BactD10134 CDS CDS     | 31.5    | 1.0  | 142.9   | O       | COG0265                                 | Trypsin-like serine proteases, typically periplasmic, contain C-terminal PDZ domain                                                                                                                        |
| Bova0387 CDS CDS       | 30.5    | 1.0  | 138.5   | O       | COG0484                                 | DnaJ-class molecular chaperone with C-terminal Zn finger domain                                                                                                                                            |
| Bxyl1319 CDS CDS       | 14.3    | 0.5  | 130.2   | O       | COG0234                                 | Co-chaperonin GroES (HSP10)                                                                                                                                                                                |
| Rtor0277 CDS CDS       | 28.5    | 1.0  | 129.4   | O       | COG0459                                 | Chaperonin GroEL (HSP60 family)                                                                                                                                                                            |
| Cbo13419 CDS CDS       | 28.0    | 1.0  | 127.1   | O       | COG0071                                 | Molecular chaperone (small heat shock protein)                                                                                                                                                             |
| Aput2048 CDS CDS       | 250.0   | 9.0  | 126.1   | O       | COG0459                                 | Chaperonin GroEL (HSP60 family)                                                                                                                                                                            |
| BactD10815 CDS CDS     | 6.5     | 0.3  | 118.0   | O       | COG0071                                 | Molecular chaperone (small heat shock protein)                                                                                                                                                             |
| Buni1264 CDS CDS       | 11.5    | 0.5  | 104.4   | O       | COG4826                                 | Serine protease inhibitor                                                                                                                                                                                  |
| Bfin0905 CDS CDS       | 22.9    | 1.0  | 103.8   | O       | COG0071                                 | Molecular chaperone (small heat shock protein)                                                                                                                                                             |
| Buni3570 CDS CDS       | 565.3   | 26.5 | 96.8    | O       | COG0443                                 | Molecular chaperone                                                                                                                                                                                        |
| TS29Bac00097 CDS CDS   | 21.2    | 1.0  | 96.1    | O       | COG0542                                 | ATPases with chaperone activity, ATP-binding subunit                                                                                                                                                       |
| TS29Par685 CDS CDS     | 39.5    | 2.0  | 89.7    | O       | COG0443                                 | Molecular chaperone                                                                                                                                                                                        |
| BactD24011 CDS CDS     | 28.4    | 1.5  | 86.0    | O       | COG0542                                 | ATPases with chaperone activity, ATP-binding subunit                                                                                                                                                       |
| Bxyl3423 CDS CDS       | 68.6    | 3.7  | 84.9    | O       | COG0542                                 | ATPases with chaperone activity, ATP-binding subunit                                                                                                                                                       |
| Bova0436 CDS CDS       | 8.6     | 0.5  | 78.4    | O       | COG0265                                 | Trypsin-like serine proteases, typically periplasmic, contain C-terminal PDZ domain                                                                                                                        |
| BactD21825 CDS CDS     | 8.6     | 0.5  | 78.4    | O       | COG0265                                 | Trypsin-like serine proteases, typically periplasmic, contain C-terminal PDZ domain                                                                                                                        |
| Bthe3732369 CDS CDS    | 22.9    | 1.3  | 77.9    | O       | COG0071                                 | Molecular chaperone (small heat shock protein)                                                                                                                                                             |
| Bthe7331683 CDS CDS    | 22.9    | 1.3  | 77.9    | O       | COG0071                                 | Molecular chaperone (small heat shock protein)                                                                                                                                                             |
| BactD12632 CDS CDS     | 22.9    | 1.3  | 77.9    | O       | COG0071                                 | Molecular chaperone (small heat shock protein)                                                                                                                                                             |
| Aput2033 CDS CDS       | 144.3   | 8.5  | 77.1    | O       | COG0542                                 | ATPases with chaperone activity, ATP-binding subunit                                                                                                                                                       |
| TS29Bac00096 CDS CDS   | 469.4   | 29.0 | 73.5    | O       | COG0542                                 | ATPases with chaperone activity, ATP-binding subunit                                                                                                                                                       |
| Bxyl1318 CDS CDS       | 274.4   | 17.5 | 71.2    | O       | COG0459                                 | Chaperonin GroEL (HSP60 family)                                                                                                                                                                            |
| Buni1556 CDS CDS       | 150.2   | 9.8  | 69.3    | O       | COG0326                                 | Molecular chaperone, HSP90 family                                                                                                                                                                          |
| Acae2680 CDS CDS       | 15.1    | 1.0  | 68.7    | O       | COG0459                                 | Chaperonin GroEL (HSP60 family)                                                                                                                                                                            |
| Bean3125 CDS CDS       | 15.0    | 1.0  | 68.1    | O       | COG0071                                 | Molecular chaperone (small heat shock protein)                                                                                                                                                             |
| TS28Fae22642 CDS CDS   | 80.8    | 5.5  | 66.7    | O       | COG0465                                 | ATP-dependent Zn proteases                                                                                                                                                                                 |
| BactD13253 CDS CDS     | 22.0    | 1.5  | 66.7    | O       | COG0576                                 | Molecular chaperone GrpE (heat shock protein)                                                                                                                                                              |
| TS29Bac08977 CDS CDS   | 43.4    | 3.0  | 65.7    | O       | COG0484                                 | DnaJ-class molecular chaperone with C-terminal Zn finger domain                                                                                                                                            |
| BactD10814 CDS CDS     | 28.2    | 2.0  | 64.1    | O       | COG0071                                 | Molecular chaperone (small heat shock protein)                                                                                                                                                             |
| TS28RumUnc2062 CDS CDS | 6.9     | 0.5  | 62.8    | O       | COG0443                                 | Molecular chaperone                                                                                                                                                                                        |
| TS28Bac5202 CDS CDS    | 4.0     | 0.3  | 54.5    | O       | COG0719                                 | ABC-type transport system involved in Fe-S cluster assembly, permease component                                                                                                                            |
| TS28Ahi1084 CDS CDS    | 12.0    | 1.0  | 54.5    | O       | COG0326                                 | Molecular chaperone, HSP90 family                                                                                                                                                                          |
| Cbo13244 CDS CDS       | 12.0    | 1.0  | 54.5    | O       | COG0071                                 | Molecular chaperone (small heat shock protein)                                                                                                                                                             |
| TS28Eub5274 CDS CDS    | 6.0     | 0.5  | 54.5    | O       | COG0542                                 | ATPases with chaperone activity, ATP-binding subunit                                                                                                                                                       |
| DpigGOR11214 CDS CDS   | 11.3    | 1.0  | 51.5    | O       | COG0459                                 | Chaperonin GroEL (HSP60 family)                                                                                                                                                                            |
| Acae0820 CDS CDS       | 11.0    | 1.0  | 49.9    | O       | COG0542                                 | ATPases with chaperone activity, ATP-binding subunit                                                                                                                                                       |
| FpraM2121935 CDS CDS   | 5.4     | 0.5  | 49.2    | O       | COG0544                                 | FKBP-type peptidyl-prolyl cis-trans isomerase (trigger factor)                                                                                                                                             |
| Bova4080 CDS CDS       | 25.4    | 2.5  | 46.1    | O       | COG0542                                 | ATPases with chaperone activity, ATP-binding subunit                                                                                                                                                       |
| TS28Rum15898 CDS CDS   | 25.3    | 2.5  | 46.0    | O       | COG0071                                 | Molecular chaperone (small heat shock protein)                                                                                                                                                             |
| Ehal2235 CDS CDS       | 10.1    | 1.0  | 45.8    | O       | COG0459                                 | Chaperonin GroEL (HSP60 family)                                                                                                                                                                            |
| Bcap2713 CDS CDS       | 10.0    | 1.0  | 45.4    | O       | COG0071                                 | Molecular chaperone (small heat shock protein)                                                                                                                                                             |

|                      |       |      |      |   |                         |                                                                                                                                            |
|----------------------|-------|------|------|---|-------------------------|--------------------------------------------------------------------------------------------------------------------------------------------|
| Cbol1826 CDS CDS     | 54.9  | 5.5  | 45.3 | 0 | COG0443                 | Molecular chaperone                                                                                                                        |
| TS29Bac02290 CDS CDS | 109.0 | 11.0 | 45.0 | 0 | COG0576                 | Molecular chaperone GrpE (heat shock protein)                                                                                              |
| BactD10727 CDS CDS   | 85.6  | 8.7  | 44.8 | 0 | COG0542                 | ATPases with chaperone activity, ATP-binding subunit                                                                                       |
| Robe0689 CDS CDS     | 9.7   | 1.0  | 43.9 | 0 | COG0071                 | Molecular chaperone (small heat shock protein)                                                                                             |
| Aput1682 CDS CDS     | 67.0  | 7.0  | 43.5 | 0 | COG0326                 | Molecular chaperone, HSP90 family                                                                                                          |
| Hfil1639 CDS CDS     | 9.5   | 1.0  | 43.1 | 0 | COG0443                 | Molecular chaperone                                                                                                                        |
| TS28Rum02228 CDS CDS | 9.5   | 1.0  | 43.1 | 0 | COG0071                 | Molecular chaperone (small heat shock protein)                                                                                             |
| TS29Bac02289 CDS CDS | 109.2 | 11.5 | 43.1 | 0 | COG0484                 | DnaJ-class molecular chaperone with C-terminal Zn finger domain                                                                            |
| TS28Clo10640 CDS CDS | 145.0 | 15.5 | 42.5 | 0 | COG1180                 | Pyruvate-formate lyase-activating enzyme                                                                                                   |
| TS29Clo1065 CDS CDS  | 145.0 | 15.5 | 42.5 | 0 | COG1180                 | Pyruvate-formate lyase-activating enzyme                                                                                                   |
| TS29Bac04323 CDS CDS | 185.2 | 19.8 | 42.4 | 0 | COG0326                 | Molecular chaperone, HSP90 family                                                                                                          |
| Bova0418 CDS CDS     | 4.7   | 0.5  | 42.2 | 0 | COG2077                 | Peroxisredoxin                                                                                                                             |
| BactD21806 CDS CDS   | 4.7   | 0.5  | 42.2 | 0 | COG2077                 | Peroxisredoxin                                                                                                                             |
| Bxyl2507 CDS CDS     | 6.0   | 0.7  | 40.9 | 0 | COG0719                 | ABC-type transport system involved in Fe-S cluster assembly, permease component                                                            |
| Bxyl3438 CDS CDS     | 69.5  | 7.8  | 40.3 | 0 | COG0443                 | Molecular chaperone                                                                                                                        |
| TS29Bac12047 CDS CDS | 48.5  | 5.6  | 39.5 | 0 | COG0071                 | Molecular chaperone (small heat shock protein)                                                                                             |
| Cbol6209 CDS CDS     | 60.8  | 7.0  | 39.5 | 0 | COG0459                 | Chaperonin GroEL (HSP60 family)                                                                                                            |
| TS29Bac08976 CDS CDS | 32.3  | 4.0  | 36.6 | 0 | COG0484 COG2214         | DnaJ-class molecular chaperone with C-terminal Zn finger domain DnaJ-class molecular chaperone                                             |
| TS28Rum15360 CDS CDS | 52.0  | 6.5  | 36.3 | 0 | COG0465                 | ATP-dependent Zn proteases                                                                                                                 |
| TS28BacUnc24 CDS CDS | 8.0   | 1.0  | 36.3 | 0 | COG0443                 | Molecular chaperone                                                                                                                        |
| Acac2686 CDS CDS     | 8.0   | 1.0  | 36.3 | 0 | COG0542                 | ATPases with chaperone activity, ATP-binding subunit                                                                                       |
| Rumhvd3322 CDS CDS   | 8.0   | 1.0  | 36.3 | 0 | COG0443                 | Molecular chaperone                                                                                                                        |
| Cbol1825 CDS CDS     | 8.0   | 1.0  | 36.3 | 0 | COG0484                 | DnaJ-class molecular chaperone with C-terminal Zn finger domain                                                                            |
| TS28Fae13136 CDS CDS | 23.8  | 3.0  | 36.0 | 0 | COG0071                 | Molecular chaperone (small heat shock protein)                                                                                             |
| TS28Rum10465 CDS CDS | 14.2  | 1.8  | 35.1 | 0 | COG0443                 | Molecular chaperone                                                                                                                        |
| ShigspD90161 CDS CDS | 3.8   | 0.5  | 34.8 | 0 | COG1220                 | ATP-dependent protease HsiVU (ClpYQ), ATPase subunit                                                                                       |
| Rtor1076 CDS CDS     | 33.3  | 4.5  | 33.6 | 0 | COG0071                 | Molecular chaperone (small heat shock protein)                                                                                             |
| TS29Bac07270 CDS CDS | 116.0 | 16.3 | 32.2 | 0 | COG0265                 | Trypsin-like serine proteases, typically periplasmic, contain C-terminal PDZ domain                                                        |
| Robe1604 CDS CDS     | 2.3   | 0.3  | 31.8 | 0 | COG0484                 | DnaJ-class molecular chaperone with C-terminal Zn finger domain                                                                            |
| Cbol2325 CDS CDS     | 7.0   | 1.0  | 31.8 | 0 | COG0265                 | Trypsin-like serine proteases, typically periplasmic, contain C-terminal PDZ domain                                                        |
| TS28Fae12055 CDS CDS | 7.0   | 1.0  | 31.8 | 0 | COG0576                 | Molecular chaperone GrpE (heat shock protein)                                                                                              |
| TS29Fae01938 CDS CDS | 7.0   | 1.0  | 31.8 | 0 | COG0544                 | FKBP-type peptidyl-prolyl cis-trans isomerase (trigger factor)                                                                             |
| Rmtl10144 CDS CDS    | 14.0  | 2.0  | 31.8 | 0 | COG0071                 | Molecular chaperone (small heat shock protein)                                                                                             |
| TS28Rum03617 CDS CDS | 13.0  | 2.0  | 29.5 | 0 | COG0326                 | Molecular chaperone, HSP90 family                                                                                                          |
| TS28Rum13475 CDS CDS | 6.5   | 1.0  | 29.5 | 0 | COG4826                 | Serine protease inhibitor                                                                                                                  |
| TS28Clo00136 CDS CDS | 8.3   | 1.3  | 28.4 | 0 | COG0443                 | Molecular chaperone                                                                                                                        |
| TS28Rum13617 CDS CDS | 40.5  | 6.5  | 28.3 | 0 | COG0326                 | Molecular chaperone, HSP90 family                                                                                                          |
| TS28Fae19331 CDS CDS | 3.1   | 0.5  | 28.0 | 0 | COG0544                 | FKBP-type peptidyl-prolyl cis-trans isomerase (trigger factor)                                                                             |
| TS28Fae14370 CDS CDS | 146.4 | 23.8 | 27.9 | 0 | COG0071                 | Molecular chaperone (small heat shock protein)                                                                                             |
| Bun11869 CDS CDS     | 9.2   | 1.5  | 27.7 | 0 | COG0826                 | Collagenase and related proteases                                                                                                          |
| TS29Bac08465 CDS CDS | 80.7  | 13.3 | 27.5 | 0 | COG0542                 | ATPases with chaperone activity, ATP-binding subunit                                                                                       |
| Bste1251 CDS CDS     | 42.4  | 7.0  | 27.5 | 0 | COG0071                 | Molecular chaperone (small heat shock protein)                                                                                             |
| Bova0514 CDS CDS     | 6.0   | 1.0  | 27.4 | 0 | COG0326                 | Molecular chaperone, HSP90 family                                                                                                          |
| TS28Fae20436 CDS CDS | 56.1  | 9.3  | 27.3 | 0 | COG0071                 | Molecular chaperone (small heat shock protein)                                                                                             |
| Bcap0150 CDS CDS     | 6.0   | 1.0  | 27.2 | 0 | COG0326                 | Molecular chaperone, HSP90 family                                                                                                          |
| TS28Rum01871 CDS CDS | 3.0   | 0.5  | 27.2 | 0 | COG1975 COG2068         | Xanthine and CO dehydrogenases maturation factor, XdhC/CoxF family Uncharacterized MobA-related protein                                    |
| Bun12305 CDS CDS     | 3.0   | 0.5  | 27.2 | 0 | COG0760                 | Parvulin-like peptidyl-prolyl isomerase                                                                                                    |
| Caer1063 CDS CDS     | 3.0   | 0.5  | 27.2 | 0 | COG0326                 | Molecular chaperone, HSP90 family                                                                                                          |
| TS28Rum04455 CDS CDS | 12.0  | 2.0  | 27.2 | 0 | COG0071                 | Molecular chaperone (small heat shock protein)                                                                                             |
| Msm1741565 CDS CDS   | 2.8   | 0.5  | 25.7 | 0 | COG0459                 | Chaperonin GroEL (HSP60 family)                                                                                                            |
| Robe2241 CDS CDS     | 5.5   | 1.0  | 25.0 | 0 | COG0484 COG2214         | DnaJ-class molecular chaperone with C-terminal Zn finger domain DnaJ-class molecular chaperone                                             |
| TS28Rum14890 CDS CDS | 5.5   | 1.0  | 25.0 | 0 | COG0826                 | Collagenase and related proteases                                                                                                          |
| Bcap2192 CDS CDS     | 16.5  | 3.0  | 25.0 | 0 | COG0443                 | Molecular chaperone                                                                                                                        |
| Bxyl0797 CDS CDS     | 24.4  | 4.5  | 24.6 | 0 | COG0576                 | Molecular chaperone GrpE (heat shock protein)                                                                                              |
| TS29Bac03133 CDS CDS | 59.3  | 11.0 | 24.5 | 0 | COG0234                 | Co-chaperonin GroES (HSP10)                                                                                                                |
| TS28Fae21987 CDS CDS | 40.2  | 7.5  | 24.3 | 0 | COG0071                 | Molecular chaperone (small heat shock protein)                                                                                             |
| TS29Rum02487 CDS CDS | 16.0  | 3.0  | 24.2 | 0 | COG0071                 | Molecular chaperone (small heat shock protein)                                                                                             |
| TS29Bac11229 CDS CDS | 87.1  | 16.8 | 23.5 | 0 | COG0443                 | Molecular chaperone                                                                                                                        |
| TS29Bac03142 CDS CDS | 46.5  | 9.0  | 23.5 | 0 | COG0484 COG2214         | DnaJ-class molecular chaperone with C-terminal Zn finger domain DnaJ-class molecular chaperone                                             |
| TS28Rum11951 CDS CDS | 5.0   | 1.0  | 22.7 | 0 | COG0484                 | DnaJ-class molecular chaperone with C-terminal Zn finger domain                                                                            |
| TS28Fae12451 CDS CDS | 10.0  | 2.0  | 22.7 | 0 | COG0465                 | ATP-dependent Zn proteases                                                                                                                 |
| Dfor0868 CDS CDS     | 5.0   | 1.0  | 22.7 | 0 | COG0234                 | Co-chaperonin GroES (HSP10)                                                                                                                |
| BactD10740 CDS CDS   | 1.7   | 0.3  | 22.9 | 0 | COG3187                 | Heat shock protein                                                                                                                         |
| FpraM2121832 CDS CDS | 58.0  | 12.0 | 21.9 | 0 | COG0443                 | Molecular chaperone                                                                                                                        |
| TS29Rum21189 CDS CDS | 130.3 | 27.0 | 21.9 | 0 | COG0071                 | Molecular chaperone (small heat shock protein)                                                                                             |
| Bxyl3238 CDS CDS     | 3.6   | 0.8  | 21.9 | 0 | COG0760                 | Parvulin-like peptidyl-prolyl isomerase                                                                                                    |
| BactD12826 CDS CDS   | 6.0   | 1.3  | 21.6 | 0 | COG0760                 | Parvulin-like peptidyl-prolyl isomerase                                                                                                    |
| TS29Rum21190 CDS CDS | 164.0 | 34.5 | 21.6 | 0 | COG0071                 | Molecular chaperone (small heat shock protein)                                                                                             |
| TS29Bac08839 CDS CDS | 28.0  | 6.0  | 21.2 | 0 | COG0265                 | Trypsin-like serine proteases, typically periplasmic, contain C-terminal PDZ domain                                                        |
| TS28Fae16180 CDS CDS | 20.9  | 4.5  | 21.1 | 0 | COG0443                 | Molecular chaperone                                                                                                                        |
| TS28Rum15681 CDS CDS | 72.3  | 16.0 | 20.5 | 0 | COG0443                 | Molecular chaperone                                                                                                                        |
| TS28Fae00934 CDS CDS | 9.0   | 2.0  | 20.4 | 0 | COG0637 COG1214 COG0546 | Predicted phosphatase/phosphohexomutase Inactive homolog of metal-dependent proteases, putative molecular chaperone Predicted phosphatases |
| Bhan0480 CDS CDS     | 4.5   | 1.0  | 20.4 | 0 | COG0542                 | ATPases with chaperone activity, ATP-binding subunit                                                                                       |
| TS28Clo03064 CDS CDS | 9.0   | 2.0  | 20.4 | 0 | COG0443                 | Molecular chaperone                                                                                                                        |
| TS28Fae03680 CDS CDS | 9.0   | 2.0  | 20.4 | 0 | COG0459                 | Chaperonin GroEL (HSP60 family)                                                                                                            |
| Rena0392 CDS CDS     | 9.0   | 2.0  | 20.4 | 0 | COG0484                 | DnaJ-class molecular chaperone with C-terminal Zn finger domain                                                                            |
| TS28Dor1724 CDS CDS  | 4.5   | 1.0  | 20.4 | 0 | COG0544                 | FKBP-type peptidyl-prolyl cis-trans isomerase (trigger factor)                                                                             |
| TS28Fae03405 CDS CDS | 4.5   | 1.0  | 20.4 | 0 | COG0459                 | Chaperonin GroEL (HSP60 family)                                                                                                            |
| TS29Rum00766 CDS CDS | 35.6  | 8.0  | 20.2 | 0 | COG0443                 | Molecular chaperone                                                                                                                        |
| BactD13604 CDS CDS   | 13.3  | 3.0  | 20.1 | 0 | COG0542                 | ATPases with chaperone activity, ATP-binding subunit                                                                                       |
| TS29Fae07607 CDS CDS | 44.0  | 10.0 | 20.0 | 0 | COG0443                 | Molecular chaperone                                                                                                                        |
| Msm1750820 CDS CDS   | 1.5   | 0.3  | 19.7 | 0 | COG1047                 | FKBP-type peptidyl-prolyl cis-trans isomerases 2                                                                                           |
| Bxyl3928 CDS CDS     | 15.1  | 3.5  | 19.6 | 0 | COG0265                 | Trypsin-like serine proteases, typically periplasmic, contain C-terminal PDZ domain                                                        |
| Msm1750714 CDS CDS   | 5.0   | 1.2  | 19.3 | 0 | COG0459                 | Chaperonin GroEL (HSP60 family)                                                                                                            |
| Bun11555 CDS CDS     | 31.5  | 7.5  | 19.1 | 0 | COG0542                 | ATPases with chaperone activity, ATP-binding subunit                                                                                       |
| BactD14216 CDS CDS   | 4.1   | 1.0  | 18.6 | 0 | COG0545                 | FKBP-type peptidyl-prolyl cis-trans isomerases 1                                                                                           |

|                       |      |      |      |   |                         |                                                                                                                                            |
|-----------------------|------|------|------|---|-------------------------|--------------------------------------------------------------------------------------------------------------------------------------------|
| TS28Dor2295 CDS CDS   | 2.0  | 0.5  | 18.2 | 0 | COG0826                 | Collagenase and related proteases                                                                                                          |
| TS28Rum10110 CDS CDS  | 4.0  | 1.0  | 18.2 | 0 | COG0309 COG1992         | Hydrogenase maturation factor Uncharacterized conserved protein                                                                            |
| Dlon0413 CDS CDS      | 2.0  | 0.5  | 18.2 | 0 | COG0826                 | Collagenase and related proteases                                                                                                          |
| Beap2191 CDS CDS      | 4.0  | 1.0  | 18.2 | 0 | COG0484                 | DnaJ-class molecular chaperone with C-terminal Zn finger domain                                                                            |
| Cmet1180 CDS CDS      | 4.0  | 1.0  | 18.2 | 0 | COG0542                 | ATPases with chaperone activity, ATP-binding subunit                                                                                       |
| TS28BacUnc23 CDS CDS  | 4.0  | 1.0  | 18.2 | 0 | COG0484                 | DnaJ-class molecular chaperone with C-terminal Zn finger domain                                                                            |
| TS28Fae03685 CDS CDS  | 4.0  | 1.0  | 18.2 | 0 | COG0544                 | FKBP-type peptidyl-prolyl cis-trans isomerase (trigger factor)                                                                             |
| TS28Fae00303 CDS CDS  | 11.8 | 3.0  | 17.9 | 0 | COG0542                 | ATPases with chaperone activity, ATP-binding subunit                                                                                       |
| Even1759 CDS CDS      | 2.0  | 0.5  | 17.7 | 0 | COG0465                 | ATP-dependent Zn proteases                                                                                                                 |
| Aput0902 CDS CDS      | 27.0 | 7.0  | 17.5 | 0 | COG0542                 | ATPases with chaperone activity, ATP-binding subunit                                                                                       |
| Bova3439 CDS CDS      | 6.2  | 1.6  | 17.5 | 0 | COG0484 COG2214         | DnaJ-class molecular chaperone with C-terminal Zn finger domain DnaJ-class molecular chaperone                                             |
| Acael1769 CDS CDS     | 7.7  | 2.0  | 17.4 | 0 | COG0443                 | Molecular chaperone                                                                                                                        |
| Buni0216 CDS CDS      | 5.0  | 1.3  | 17.0 | 0 | COG0719                 | ABC-type transport system involved in Fe-S cluster assembly, permease component                                                            |
| TS29Ai1408 CDS CDS    | 23.8 | 6.5  | 16.6 | 0 | COG0542                 | ATPases with chaperone activity, ATP-binding subunit                                                                                       |
| Rtor1695 CDS CDS      | 5.5  | 1.5  | 16.6 | 0 | COG0484                 | DnaJ-class molecular chaperone with C-terminal Zn finger domain                                                                            |
| TS28Rum07454 CDS CDS  | 5.5  | 1.5  | 16.6 | 0 | COG0484                 | DnaJ-class molecular chaperone with C-terminal Zn finger domain                                                                            |
| TS28Fae21350 CDS CDS  | 16.0 | 4.5  | 16.1 | 0 | COG0071                 | Molecular chaperone (small heat shock protein)                                                                                             |
| BactD23099 CDS CDS    | 7.0  | 2.0  | 16.0 | 0 | COG0326                 | Molecular chaperone, HSP90 family                                                                                                          |
| ShigspD91612 CDS CDS  | 1.2  | 0.3  | 15.9 | 0 | COG0465                 | ATP-dependent Zn proteases                                                                                                                 |
| TS29Bac04280 CDS CDS  | 7.0  | 2.0  | 15.9 | 0 | COG0545                 | FKBP-type peptidyl-prolyl cis-trans isomerases 1                                                                                           |
| TS28Rum13562 CDS CDS  | 3.5  | 1.0  | 15.9 | 0 | COG0071                 | Molecular chaperone (small heat shock protein)                                                                                             |
| TS28Met0356 CDS CDS   | 3.5  | 1.0  | 15.9 | 0 | COG0396                 | ABC-type transport system involved in Fe-S cluster assembly, ATPase component                                                              |
| TS28Clo08951 CDS CDS  | 3.5  | 1.0  | 15.9 | 0 | COG0542                 | ATPases with chaperone activity, ATP-binding subunit                                                                                       |
| TS28Col1524 CDS CDS   | 3.5  | 1.0  | 15.9 | 0 | COG0265                 | Trypsin-like serine proteases, typically periplasmic, contain C-terminal PDZ domain                                                        |
| TS28Fae18734 CDS CDS  | 19.0 | 5.5  | 15.7 | 0 | COG0265                 | Trypsin-like serine proteases, typically periplasmic, contain C-terminal PDZ domain                                                        |
| TS28Fae10762 CDS CDS  | 20.5 | 6.0  | 15.5 | 0 | COG0576                 | Molecular chaperone GrpE (heat shock protein)                                                                                              |
| BactD12369 CDS CDS    | 2.8  | 0.8  | 15.4 | 0 | COG3590                 | Predicted metalloendopeptidase                                                                                                             |
| Bxyl3171 CDS CDS      | 7.3  | 2.2  | 15.4 | 0 | COG0612 COG1025         | Predicted Zn-dependent peptidases Secreted/periplasmic Zn-dependent peptidases, insulinase-like                                            |
| TS28Rum13474 CDS CDS  | 23.5 | 7.0  | 15.2 | 0 | COG0265                 | Trypsin-like serine proteases, typically periplasmic, contain C-terminal PDZ domain                                                        |
| TS28Fae17572 CDS CDS  | 40.8 | 12.3 | 15.0 | 0 | COG0071                 | Molecular chaperone (small heat shock protein)                                                                                             |
| TS28Fae00044 CDS CDS  | 34.7 | 10.5 | 15.0 | 0 | COG0459                 | Chaperonin GroEL (HSP60 family)                                                                                                            |
| Rgna0393 CDS CDS      | 19.5 | 6.0  | 14.8 | 0 | COG0443                 | Molecular chaperone                                                                                                                        |
| Mmul2106 CDS CDS      | 6.5  | 2.0  | 14.8 | 0 | COG0459                 | Chaperonin GroEL (HSP60 family)                                                                                                            |
| Csci3942 CDS CDS      | 3.3  | 1.0  | 14.8 | 0 | COG0542                 | ATPases with chaperone activity, ATP-binding subunit                                                                                       |
| TS29Rum00574 CDS CDS  | 55.3 | 17.0 | 14.8 | 0 | COG0544                 | FKBP-type peptidyl-prolyl cis-trans isomerase (trigger factor)                                                                             |
| TS28Fae13683 CDS CDS  | 14.4 | 4.5  | 14.5 | 0 | COG0459                 | Chaperonin GroEL (HSP60 family)                                                                                                            |
| TS29Bac09072 CDS CDS  | 32.0 | 10.0 | 14.5 | 0 | COG1047                 | FKBP-type peptidyl-prolyl cis-trans isomerases 2                                                                                           |
| TS28Rum07453 CDS CDS  | 14.3 | 4.7  | 13.9 | 0 | COG0443                 | Molecular chaperone                                                                                                                        |
| Bova3948 CDS CDS      | 12.8 | 4.3  | 13.7 | 0 | COG0760                 | Parvulin-like peptidyl-prolyl isomerase                                                                                                    |
| TS28Fae15347 CDS CDS  | 3.0  | 1.0  | 13.6 | 0 | COG0691                 | tmRNA-binding protein                                                                                                                      |
| TS28Clo05586 CDS CDS  | 3.0  | 1.0  | 13.6 | 0 | COG0533 COG1214         | Metal-dependent proteases with possible chaperone activity Inactive homolog of metal-dependent proteases, putative molecular chaperone     |
| TS28Bac1190 CDS CDS   | 1.5  | 0.5  | 13.6 | 0 | COG0465                 | ATP-dependent Zn proteases                                                                                                                 |
| Buni3186 CDS CDS      | 3.0  | 1.0  | 13.6 | 0 | COG0545                 | FKBP-type peptidyl-prolyl cis-trans isomerases 1                                                                                           |
| Svar0626 CDS CDS      | 3.0  | 1.0  | 13.6 | 0 | COG0544                 | FKBP-type peptidyl-prolyl cis-trans isomerase (trigger factor)                                                                             |
| TS29Rum10777 CDS CDS  | 1.5  | 0.5  | 13.6 | 0 | COG0637 COG1214 COG0546 | Predicted phosphatase/phosphohexomutase Inactive homolog of metal-dependent proteases, putative molecular chaperone Predicted phosphatases |
| Rgna2792 CDS CDS      | 1.5  | 0.5  | 13.6 | 0 | COG0637 COG1214 COG0546 | Predicted phosphatase/phosphohexomutase Inactive homolog of metal-dependent proteases, putative molecular chaperone Predicted phosphatases |
| TS28Rum16032 CDS CDS  | 6.0  | 2.0  | 13.6 | 0 | COG1219                 | ATP-dependent protease Clp, ATPase subunit                                                                                                 |
| Msm1740680 CDS CDS    | 1.5  | 0.5  | 13.6 | 0 | COG0484                 | DnaJ-class molecular chaperone with C-terminal Zn finger domain                                                                            |
| Casp1113 CDS CDS      | 3.0  | 1.0  | 13.6 | 0 | COG0465                 | ATP-dependent Zn proteases                                                                                                                 |
| TS28Rum00999 CDS CDS  | 3.0  | 1.0  | 13.6 | 0 | COG0542                 | ATPases with chaperone activity, ATP-binding subunit                                                                                       |
| ShigspD91293 CDS CDS  | 1.5  | 0.5  | 13.6 | 0 | COG0330                 | Membrane protease subunits, stomatin/brohibitin homologs                                                                                   |
| Rmtl12108 CDS CDS     | 6.0  | 2.0  | 13.6 | 0 | COG0459                 | Chaperonin GroEL (HSP60 family)                                                                                                            |
| Bova1926 CDS CDS      | 3.0  | 1.0  | 13.6 | 0 | COG0466                 | ATP-dependent Lon protease, bacterial type                                                                                                 |
| TS29Rum10232 CDS CDS  | 18.4 | 6.0  | 13.6 | 0 | COG0544                 | FKBP-type peptidyl-prolyl cis-trans isomerase (trigger factor)                                                                             |
| BactD21345 CDS CDS    | 6.2  | 2.1  | 13.3 | 0 | COG0484 COG2214         | DnaJ-class molecular chaperone with C-terminal Zn finger domain DnaJ-class molecular chaperone                                             |
| Beap0454 CDS CDS      | 20.5 | 7.0  | 13.3 | 0 | COG0459                 | Chaperonin GroEL (HSP60 family)                                                                                                            |
| TS28Rum10464 CDS CDS  | 17.5 | 6.0  | 13.2 | 0 | COG0576                 | Molecular chaperone GrpE (heat shock protein)                                                                                              |
| Bhan0262 CDS CDS      | 5.8  | 2.0  | 13.1 | 0 | COG0443                 | Molecular chaperone                                                                                                                        |
| TS28Bif0718 CDS CDS   | 10.1 | 3.5  | 13.0 | 0 | COG0465                 | ATP-dependent Zn proteases                                                                                                                 |
| TS29Rum01497 CDS CDS  | 17.0 | 6.0  | 12.9 | 0 | COG0071                 | Molecular chaperone (small heat shock protein)                                                                                             |
| TS28Rum01574 CDS CDS  | 2.8  | 1.0  | 12.9 | 0 | COG0234                 | Co-chaperonin GroES (HSP10)                                                                                                                |
| TS29Bac01271 CDS CDS  | 11.3 | 4.0  | 12.9 | 0 | COG0544                 | FKBP-type peptidyl-prolyl cis-trans isomerase (trigger factor)                                                                             |
| Bxyl1074 CDS CDS      | 1.4  | 0.5  | 12.9 | 0 | COG1047                 | FKBP-type peptidyl-prolyl cis-trans isomerases 2                                                                                           |
| Rtor1694 CDS CDS      | 14.3 | 5.2  | 12.6 | 0 | COG0443                 | Molecular chaperone                                                                                                                        |
| TS29Bac08975 CDS CDS  | 24.9 | 9.0  | 12.5 | 0 | COG0576                 | Molecular chaperone GrpE (heat shock protein)                                                                                              |
| Rgna0856 CDS CDS      | 11.0 | 4.0  | 12.5 | 0 | COG0484 COG2214         | DnaJ-class molecular chaperone with C-terminal Zn finger domain DnaJ-class molecular chaperone                                             |
| TS28Clo06646 CDS CDS  | 11.0 | 4.0  | 12.5 | 0 | COG1180                 | Pyruvate-formate lyase-activating enzyme                                                                                                   |
| TS28Met0139 CDS CDS   | 5.5  | 2.0  | 12.5 | 0 | COG0459                 | Chaperonin GroEL (HSP60 family)                                                                                                            |
| FpraM2120868 CDS CDS  | 26.1 | 9.5  | 12.5 | 0 | COG0443                 | Molecular chaperone                                                                                                                        |
| TS29LacUnc038 CDS CDS | 19.0 | 7.0  | 12.3 | 0 | COG0465                 | ATP-dependent Zn proteases                                                                                                                 |
| Bxyl0423 CDS CDS      | 11.2 | 4.2  | 12.2 | 0 | COG0326                 | Molecular chaperone, HSP90 family                                                                                                          |
| TS28Dor2218 CDS CDS   | 5.4  | 2.0  | 12.2 | 0 | COG0443                 | Molecular chaperone                                                                                                                        |
| Caer1725 CDS CDS      | 25.0 | 9.5  | 11.9 | 0 | COG0443                 | Molecular chaperone                                                                                                                        |
| BactD13766 CDS CDS    | 7.0  | 2.7  | 11.9 | 0 | COG0719                 | ABC-type transport system involved in Fe-S cluster assembly, permease component                                                            |
| TS29Rum05274 CDS CDS  | 13.0 | 5.0  | 11.8 | 0 | COG0443                 | Molecular chaperone                                                                                                                        |
| Bova0386 CDS CDS      | 5.2  | 2.0  | 11.8 | 0 | COG0576                 | Molecular chaperone GrpE (heat shock protein)                                                                                              |
| TS28Met1763 CDS CDS   | 1.7  | 0.7  | 11.6 | 0 | COG0459                 | Chaperonin GroEL (HSP60 family)                                                                                                            |
| TS28Fae02429 CDS CDS  | 5.0  | 2.0  | 11.3 | 0 | COG0464 COG0790         | ATPases of the AAA+ class FOG: TPR repeat, SEL1 subfamily                                                                                  |
| TS29Bac08374 CDS CDS  | 2.5  | 1.0  | 11.3 | 0 | COG0545                 | FKBP-type peptidyl-prolyl cis-trans isomerases 1                                                                                           |
| Aput2283 CDS CDS      | 5.0  | 2.0  | 11.3 | 0 | COG0760                 | Parvulin-like peptidyl-prolyl isomerase                                                                                                    |
| DpigATC1297 CDS CDS   | 2.5  | 1.0  | 11.3 | 0 | COG0465                 | ATP-dependent Zn proteases                                                                                                                 |
| TS28Rum11937 CDS CDS  | 5.0  | 2.0  | 11.3 | 0 | COG0265                 | Trypsin-like serine proteases, typically periplasmic, contain C-terminal PDZ domain                                                        |

|                      |      |       |      |       |                                         |                                                                                                                                                                                                                                                                                                                                                                                                                                                                           |
|----------------------|------|-------|------|-------|-----------------------------------------|---------------------------------------------------------------------------------------------------------------------------------------------------------------------------------------------------------------------------------------------------------------------------------------------------------------------------------------------------------------------------------------------------------------------------------------------------------------------------|
| TS29Clo4647 CDS CDS  | 2.5  | 1.0   | 11.3 | O     | COG0234                                 | Co-chaperonin GroES (HSP10)                                                                                                                                                                                                                                                                                                                                                                                                                                               |
| Msmi740790 CDS CDS   | 2.5  | 1.0   | 11.3 | O     | COG0396                                 | ABC-type transport system involved in Fe-S cluster assembly, ATPase component                                                                                                                                                                                                                                                                                                                                                                                             |
| TS29Rum09003 CDS CDS | 5.0  | 2.0   | 11.3 | O     | COG0544                                 | FKBP-type peptidyl-prolyl cis-trans isomerase (trigger factor)                                                                                                                                                                                                                                                                                                                                                                                                            |
| TS29Aii162 CDS CDS   | 7.5  | 3.0   | 11.3 | O     | COG0466                                 | ATP-dependent Lon protease, bacterial type                                                                                                                                                                                                                                                                                                                                                                                                                                |
| TS29Rum04971 CDS CDS | 7.5  | 3.0   | 11.3 | O     | COG0326                                 | Molecular chaperone, HSP90 family                                                                                                                                                                                                                                                                                                                                                                                                                                         |
| TS29Clo4152 CDS CDS  | 1.7  | 0.7   | 11.3 | O     | COG1219                                 | ATP-dependent protease Clp, ATPase subunit                                                                                                                                                                                                                                                                                                                                                                                                                                |
| TS28Eub6537 CDS CDS  | 2.0  | 0.8   | 10.9 | O     | COG0265                                 | Trypsin-like serine proteases, typically periplasmic, contain C-terminal PDZ domain                                                                                                                                                                                                                                                                                                                                                                                       |
| Casp3707 CDS CDS     | 1.2  | 0.5   | 10.9 | O     | COG0330                                 | Membrane protease subunits, stomatin/prohibitin homologs                                                                                                                                                                                                                                                                                                                                                                                                                  |
| Bxvi2488 CDS CDS     | 3.6  | 1.5   | 10.7 | O     | COG0326                                 | Molecular chaperone, HSP90 family                                                                                                                                                                                                                                                                                                                                                                                                                                         |
| FpraM2121084 CDS CDS | 4.7  | 2.0   | 10.7 | O     | COG0330                                 | Membrane protease subunits, stomatin/prohibitin homologs                                                                                                                                                                                                                                                                                                                                                                                                                  |
| BactD13767 CDS CDS   | 1.2  | 0.5   | 10.6 | O     | COG0396                                 | ABC-type transport system involved in Fe-S cluster assembly, ATPase component                                                                                                                                                                                                                                                                                                                                                                                             |
| Rega1990 CDS CDS     | 3.5  | 1.5   | 10.6 | O     | COG0234                                 | Co-chaperonin GroES (HSP10)                                                                                                                                                                                                                                                                                                                                                                                                                                               |
| TS28Eub0003 CDS CDS  | 3.5  | 1.5   | 10.6 | O     | COG0446 COG0492                         | Uncharacterized NAD(FAD)-dependent dehydrogenases Thioredoxin reductase                                                                                                                                                                                                                                                                                                                                                                                                   |
| TS29Rum07215 CDS CDS | 3.5  | 1.5   | 10.6 | O     | COG0234                                 | Co-chaperonin GroES (HSP10)                                                                                                                                                                                                                                                                                                                                                                                                                                               |
| Bxvi0483 CDS CDS     | 5.8  | 2.5   | 10.6 | O     | COG0466                                 | ATP-dependent Lon protease, bacterial type                                                                                                                                                                                                                                                                                                                                                                                                                                |
| TS28Bac1619 CDS CDS  | 5.0  | 2.2   | 10.5 | O     | COG0826                                 | Collagenase and related proteases                                                                                                                                                                                                                                                                                                                                                                                                                                         |
| Bova0515 CDS CDS     | 6.8  | 3.0   | 10.3 | O     | COG0542                                 | ATPases with chaperone activity, ATP-binding subunit                                                                                                                                                                                                                                                                                                                                                                                                                      |
| TS28Rum12511 CDS CDS | 4.5  | 2.0   | 10.2 | O     | COG0484 COG2214                         | DnaJ-class molecular chaperone with C-terminal Zn finger domain DnaJ-class molecular chaperone                                                                                                                                                                                                                                                                                                                                                                            |
| TS29Rum10231 CDS CDS | 4.5  | 2.0   | 10.2 | O     | COG0544                                 | FKBP-type peptidyl-prolyl cis-trans isomerase (trigger factor)                                                                                                                                                                                                                                                                                                                                                                                                            |
| TS28Clo08817 CDS CDS | 3.3  | 1.5   | 10.1 | O     | COG0326                                 | Molecular chaperone, HSP90 family                                                                                                                                                                                                                                                                                                                                                                                                                                         |
| TS29Col0010 CDS CDS  | 1.0  | 46.0  | 0.1  | O     | COG0826                                 | Collagenase and related proteases                                                                                                                                                                                                                                                                                                                                                                                                                                         |
| TS29Bif4111 CDS CDS  | 1.5  | 69.8  | 0.1  | O     | COG0330                                 | Membrane protease subunits, stomatin/prohibitin homologs                                                                                                                                                                                                                                                                                                                                                                                                                  |
| TS28Fae00026 CDS CDS | 0.5  | 24.5  | 0.1  | O     | COG0396                                 | ABC-type transport system involved in Fe-S cluster assembly, ATPase component                                                                                                                                                                                                                                                                                                                                                                                             |
| TS29Bif0247 CDS CDS  | 0.3  | 17.2  | 0.1  | O     | COG3118                                 | Thioredoxin domain-containing protein                                                                                                                                                                                                                                                                                                                                                                                                                                     |
| TS29Col0525 CDS CDS  | 1.0  | 52.0  | 0.1  | O     | COG0826                                 | Collagenase and related proteases                                                                                                                                                                                                                                                                                                                                                                                                                                         |
| TS28Bif178 CDS CDS   | 0.3  | 13.1  | 0.1  | O     | COG0576                                 | Molecular chaperone GrpE (heat shock protein)                                                                                                                                                                                                                                                                                                                                                                                                                             |
| TS29Bif0594 CDS CDS  | 0.3  | 13.1  | 0.1  | O     | COG0576                                 | Molecular chaperone GrpE (heat shock protein)                                                                                                                                                                                                                                                                                                                                                                                                                             |
| TS29Col1396 CDS CDS  | 0.5  | 30.0  | 0.1  | O     | COG0576                                 | Molecular chaperone GrpE (heat shock protein)                                                                                                                                                                                                                                                                                                                                                                                                                             |
| TS29Col1411 CDS CDS  | 0.5  | 31.0  | 0.1  | O     | COG0409                                 | Hydrogenase maturation factor                                                                                                                                                                                                                                                                                                                                                                                                                                             |
| TS29Met0651 CDS CDS  | 0.2  | 13.6  | 0.1  | O     | COG1899                                 | Deoxyhypusine synthase                                                                                                                                                                                                                                                                                                                                                                                                                                                    |
| TS29Bac11731 CDS CDS | 0.2  | 11.3  | 0.1  | O     | COG0602 COG3759                         | Organic radical activating enzymes Predicted membrane protein                                                                                                                                                                                                                                                                                                                                                                                                             |
| TS28Bif4910 CDS CDS  | 0.3  | 18.0  | 0.1  | O     | COG0691                                 | tmRNA-binding protein                                                                                                                                                                                                                                                                                                                                                                                                                                                     |
| TS29Bif3474 CDS CDS  | 0.3  | 18.0  | 0.1  | O     | COG0691                                 | tmRNA-binding protein                                                                                                                                                                                                                                                                                                                                                                                                                                                     |
| TS28Bif4312 CDS CDS  | 0.1  | 9.2   | 0.1  | O     | COG0542                                 | ATPases with chaperone activity, ATP-binding subunit                                                                                                                                                                                                                                                                                                                                                                                                                      |
| TS28Fae20193 CDS CDS | 0.5  | 41.0  | 0.1  | O     | COG0466                                 | ATP-dependent Lon protease, bacterial type                                                                                                                                                                                                                                                                                                                                                                                                                                |
| TS29Bif2556 CDS CDS  | 0.5  | 42.0  | 0.1  | O     | COG0652                                 | Peptidyl-prolyl cis-trans isomerase (rotamase) - cyclophilin family                                                                                                                                                                                                                                                                                                                                                                                                       |
| TS29Bif4028 CDS CDS  | 1.1  | 115.6 | 0.0  | O     | COG0542                                 | ATPases with chaperone activity, ATP-binding subunit                                                                                                                                                                                                                                                                                                                                                                                                                      |
| TS29Fae00322 CDS CDS | 0.5  | 57.0  | 0.0  | O     | COG0826                                 | Collagenase and related proteases                                                                                                                                                                                                                                                                                                                                                                                                                                         |
| TS28Bif0650 CDS CDS  | 0.5  | 65.3  | 0.0  | O     | COG3590                                 | Predicted metalloendopeptidase                                                                                                                                                                                                                                                                                                                                                                                                                                            |
| Bpse0350 CDS CDS     | 0.1  | 18.8  | 0.0  | O     | COG0542                                 | ATPases with chaperone activity, ATP-binding subunit                                                                                                                                                                                                                                                                                                                                                                                                                      |
| TS29Col1409 CDS CDS  | 0.5  | 81.0  | 0.0  | O     | COG0068 COG0298                         | Hydrogenase maturation factor Hydrogenase maturation factor                                                                                                                                                                                                                                                                                                                                                                                                               |
| TS29Bif3936 CDS CDS  | 0.5  | 102.2 | 0.0  | O     | COG3590                                 | Predicted metalloendopeptidase                                                                                                                                                                                                                                                                                                                                                                                                                                            |
| TS29Bif1659 CDS CDS  | 0.1  | 46.7  | 0.0  | O     | COG0542                                 | ATPases with chaperone activity, ATP-binding subunit                                                                                                                                                                                                                                                                                                                                                                                                                      |
| TS29Bif3037 CDS CDS  | 0.3  | 104.4 | 0.0  | O     | COG0606                                 | Predicted ATPase with chaperone activity                                                                                                                                                                                                                                                                                                                                                                                                                                  |
| TS29Bac06014 CDS CDS | 33.0 | 8.0   | 18.7 | O C   | COG0526 COG3118                         | Thiol-disulfide isomerase and thioredoxins Thioredoxin domain-containing protein                                                                                                                                                                                                                                                                                                                                                                                          |
| TS29Rum03180 CDS CDS | 6.0  | 2.0   | 13.6 | O C   | COG0526 COG0492                         | Thiol-disulfide isomerase and thioredoxins Thioredoxin reductase                                                                                                                                                                                                                                                                                                                                                                                                          |
| TS29Rum17082 CDS CDS | 0.5  | 23.5  | 0.1  | O C   | COG0526                                 | Thiol-disulfide isomerase and thioredoxins                                                                                                                                                                                                                                                                                                                                                                                                                                |
| TS29Fae06719 CDS CDS | 0.5  | 29.0  | 0.1  | O C   | COG0526                                 | Thiol-disulfide isomerase and thioredoxins                                                                                                                                                                                                                                                                                                                                                                                                                                |
| TS28Fae22864 CDS CDS | 1.0  | 71.0  | 0.1  | O C   | COG0526 COG0492                         | Thiol-disulfide isomerase and thioredoxins Thioredoxin reductase                                                                                                                                                                                                                                                                                                                                                                                                          |
| TS29Bif0497 CDS CDS  | 1.5  | 135.9 | 0.1  | O C   | COG0526 COG0492                         | Thiol-disulfide isomerase and thioredoxins Thioredoxin reductase                                                                                                                                                                                                                                                                                                                                                                                                          |
| TS29Bac06187 CDS CDS | 3.3  | 1.5   | 10.1 | O C V | COG2274 COG1132 COG5265 COG4987         | ABC-type bacteriocin/lantibiotic exporters, contain an N-terminal double-glycine peptidase domain ABC-type multidrug transport system, ATPase and permease components ABC-type transport system involved in Fe-S cluster assembly, permease and ATPase components ABC-type transport system involved in cytochrome bd biosynthesis, fused ATPase and permease components                                                                                                  |
| TS29Bif0895 CDS CDS  | 3.3  | 189.8 | 0.1  | O C V | COG2274 COG1132 COG5265 COG4988 COG4987 | ABC-type bacteriocin/lantibiotic exporters, contain an N-terminal double-glycine peptidase domain ABC-type multidrug transport system, ATPase and permease components ABC-type transport system involved in Fe-S cluster assembly, permease and ATPase components ABC-type transport system involved in cytochrome bd biosynthesis, ATPase and permease components ABC-type transport system involved in cytochrome bd biosynthesis, fused ATPase and permease components |
| TS28Bif0390 CDS CDS  | 3.3  | 189.8 | 0.1  | O C V | COG2274 COG1132 COG5265 COG4988 COG4987 | ABC-type bacteriocin/lantibiotic exporters, contain an N-terminal double-glycine peptidase domain ABC-type multidrug transport system, ATPase and permease components ABC-type transport system involved in Fe-S cluster assembly, permease and ATPase components ABC-type transport system involved in cytochrome bd biosynthesis, ATPase and permease components ABC-type transport system involved in cytochrome bd biosynthesis, fused ATPase and permease components |
| TS29Rum11430 CDS CDS | 1.0  | 71.5  | 0.1  | O C V | COG1132 COG4987                         | ABC-type multidrug transport system, ATPase and permease components ABC-type transport system involved in cytochrome bd biosynthesis, fused ATPase and permease components                                                                                                                                                                                                                                                                                                |
| TS29Col0711 CDS CDS  | 1.0  | 86.0  | 0.1  | O C V | COG1132 COG5265 COG4988                 | ABC-type multidrug transport system, ATPase and permease components ABC-type transport system involved in Fe-S cluster assembly, permease and ATPase components ABC-type transport system involved in cytochrome bd biosynthesis, ATPase and permease components                                                                                                                                                                                                          |
| TS29Col1412 CDS CDS  | 0.5  | 31.0  | 0.1  | O H   | COG0611 COG0309 COG1992                 | Thiamine monophosphate kinase Hydrogenase maturation factor Uncharacterized conserved protein                                                                                                                                                                                                                                                                                                                                                                             |
| TS29Fae01165 CDS CDS | 0.5  | 57.0  | 0.0  | O K   | COG0378                                 | Ni <sup>2+</sup> -binding GTPase involved in regulation of expression and maturation of urease and hydrogenase                                                                                                                                                                                                                                                                                                                                                            |
| TS28Rum01487 CDS CDS | 3.0  | 0.5   | 27.2 | O M   | COG3914 COG0463 COG1216 COG1887 COG3754 | Predicted O-linked N-acetylglucosamine transferase, SPINDLY family Glycosyltransferases involved in cell wall biogenesis Predicted glycosyltransferases Putative glycosyl/glycerophosphate transferases involved in teichoic acid biosynthesis TagF/TagB/EpsJ/RodC Lipopolysaccharide biosynthesis protein                                                                                                                                                                |

|                      |      |       |       |         |                                                 |                                                                                                                                                                                                                                                                                                                                      |
|----------------------|------|-------|-------|---------|-------------------------------------------------|--------------------------------------------------------------------------------------------------------------------------------------------------------------------------------------------------------------------------------------------------------------------------------------------------------------------------------------|
| TS28Fae18569 CDS CDS | 0.5  | 57.5  | 0.0   | O M I   | COG3914 COG0463 COG1216 COG1835 COG1887 COG3754 | Predicted O-linked N-acetylglucosamine transferase, SPINDLY family Glycosyltransferases involved in cell wall biogenesis Predicted glycosyltransferases Predicted acyltransferases Putative glycosylglycerophosphate transferases involved in teichoic acid biosynthesis TagF/TagB/EpsJ/RodC Linopolysaccharide biosynthesis protein |
| TS29Rum20133 CDS CDS | 5.0  | 308.0 | 0.1   | O M U Q | COG4886 COG2931 COG3210 COG1404 COG5632         | Leucine-rich repeat (LRR) protein RTX toxins and related Ca2+-binding proteins Large exoproteins involved in heme utilization or adhesion Subtilisin-like serine proteases N-acetyl-muramoyl-L-alanine amidase                                                                                                                       |
| TS28Rum14049 CDS CDS | 3.5  | 0.5   | 31.8  | O Q     | COG0561 COG2050 COG4696 COG0652                 | Predicted hydrolases of the HAD superfamily Uncharacterized protein, possibly involved in aromatic compounds catabolism Uncharacterized protein conserved in bacterial Peptidyl-prolyl cis-trans isomerase (rotamase) - cyclophilin family                                                                                           |
| TS29Bif1891 CDS CDS  | 0.7  | 33.7  | 0.1   | O T     | COG1391                                         | Glutamine synthetase adenyltransferase                                                                                                                                                                                                                                                                                               |
| Robe1971 CDS CDS     | 2.3  | 0.3   | 31.8  | O U     | COG0740                                         | Protease subunit of ATP-dependent Clp proteases                                                                                                                                                                                                                                                                                      |
| TS28Rum16034 CDS CDS | 15.9 | 3.0   | 24.0  | O U     | COG0740                                         | Protease subunit of ATP-dependent Clp proteases                                                                                                                                                                                                                                                                                      |
| TS28Bif0586 CDS CDS  | 0.3  | 11.5  | 0.1   | O U     | COG0740                                         | Protease subunit of ATP-dependent Clp proteases                                                                                                                                                                                                                                                                                      |
| TS29Bif3046 CDS CDS  | 0.3  | 23.5  | 0.0   | O U     | COG0740                                         | Protease subunit of ATP-dependent Clp proteases                                                                                                                                                                                                                                                                                      |
| b1978 CDS adhesin    | 4.0  | 1.0   | 18.2  | O U W   | COG1404 COG3210 COG5295                         | Subtilisin-like serine proteases Large exoproteins involved in heme utilization or adhesion Autotransporter adhesin                                                                                                                                                                                                                  |
| ShigspD92536 CDS CDS | 3.0  | 1.0   | 13.6  | O U W   | COG1404 COG3210 COG5295                         | Subtilisin-like serine proteases Large exoproteins involved in heme utilization or adhesion Autotransporter adhesin                                                                                                                                                                                                                  |
| TS29Fae10180 CDS CDS | 1.0  | 47.5  | 0.1   | O V     | COG1132 COG5265                                 | ABC-type multidrug transport system, ATPase and permease components ABC-type transport system involved in Fe-S cluster assembly, permease and ATPase components                                                                                                                                                                      |
| TS29Fae07435 CDS CDS | 1.0  | 52.0  | 0.1   | O V     | COG1132 COG5265                                 | ABC-type multidrug transport system, ATPase and permease components ABC-type transport system involved in Fe-S cluster assembly, permease and ATPase components                                                                                                                                                                      |
| TS29Bif2390 CDS CDS  | 1.7  | 87.7  | 0.1   | O V     | COG2274 COG1132 COG5265                         | ABC-type bacteriocin/lantibiotic exporters, contain an N-terminal double-glycine peptidase domain ABC-type multidrug transport system, ATPase and permease components ABC-type transport system involved in Fe-S cluster assembly, permease and ATPase components                                                                    |
| TS29Fae08001 CDS CDS | 1.7  | 96.5  | 0.1   | O V     | COG1132 COG5265                                 | ABC-type multidrug transport system, ATPase and permease components ABC-type transport system involved in Fe-S cluster assembly, permease and ATPase components                                                                                                                                                                      |
| TS28Bif0914 CDS CDS  | 1.7  | 98.2  | 0.1   | O V     | COG2274 COG1132 COG5265                         | ABC-type bacteriocin/lantibiotic exporters, contain an N-terminal double-glycine peptidase domain ABC-type multidrug transport system, ATPase and permease components ABC-type transport system involved in Fe-S cluster assembly, permease and ATPase components                                                                    |
| TS28Rum11649 CDS CDS | 0.5  | 29.5  | 0.1   | O V     | COG1132 COG5265                                 | ABC-type multidrug transport system, ATPase and permease components ABC-type transport system involved in Fe-S cluster assembly, permease and ATPase components                                                                                                                                                                      |
| TS29Co11566 CDS CDS  | 1.0  | 69.0  | 0.1   | O V     | COG1132 COG5265                                 | ABC-type multidrug transport system, ATPase and permease components ABC-type transport system involved in Fe-S cluster assembly, permease and ATPase components                                                                                                                                                                      |
| TS29Fae04222 CDS CDS | 0.5  | 42.5  | 0.1   | O V     | COG1132 COG5265                                 | ABC-type multidrug transport system, ATPase and permease components ABC-type transport system involved in Fe-S cluster assembly, permease and ATPase components                                                                                                                                                                      |
| TS29Co11883 CDS CDS  | 0.5  | 50.5  | 0.0   | O V     | COG1132 COG5265                                 | ABC-type multidrug transport system, ATPase and permease components ABC-type transport system involved in Fe-S cluster assembly, permease and ATPase components                                                                                                                                                                      |
| Bste1248 CDS CDS     | 56.5 | 2.0   | 128.2 | P       | COG1528                                         | Ferritin-like protein                                                                                                                                                                                                                                                                                                                |
| TS29Bac07333 CDS CDS | 19.0 | 1.0   | 86.3  | P       | COG1528                                         | Ferritin-like protein                                                                                                                                                                                                                                                                                                                |
| Bthe3732372 CDS CDS  | 2.6  | 0.3   | 47.8  | P       | COG1528                                         | Ferritin-like protein                                                                                                                                                                                                                                                                                                                |
| Bfin0902 CDS CDS     | 2.6  | 0.3   | 47.8  | P       | COG1528                                         | Ferritin-like protein                                                                                                                                                                                                                                                                                                                |
| Bthe7331680 CDS CDS  | 2.6  | 0.3   | 47.8  | P       | COG1528                                         | Ferritin-like protein                                                                                                                                                                                                                                                                                                                |
| BactD12629 CDS CDS   | 2.6  | 0.3   | 47.8  | P       | COG1528                                         | Ferritin-like protein                                                                                                                                                                                                                                                                                                                |
| TS28Bac1462 CDS CDS  | 33.3 | 3.7   | 41.3  | P       | COG4771                                         | Outer membrane receptor for ferrienterochelin and colicins                                                                                                                                                                                                                                                                           |
| Caer0748 CDS CDS     | 4.0  | 0.5   | 36.3  | P       | COG0569 COG0475                                 | K+ transport systems, NAD-binding component Kef-type K+ transport systems, membrane components                                                                                                                                                                                                                                       |
| TS28Bac3068 CDS CDS  | 5.3  | 0.7   | 36.3  | P       | COG0370 COG1918                                 | Fe2+ transport system protein B Fe2+ transport system protein A                                                                                                                                                                                                                                                                      |
| Buni3479 CDS CDS     | 5.3  | 0.7   | 36.3  | P       | COG0370 COG1918                                 | Fe2+ transport system protein B Fe2+ transport system protein A                                                                                                                                                                                                                                                                      |
| TS28Rum15957 CDS CDS | 7.5  | 1.0   | 34.0  | P       | COG1253 COG4536 COG4535                         | Hemolysins and related proteins containing CBS domains Putative Mg2+ and Co2+ transporter CorB Putative Mg2+ and Co2+ transporter CorC                                                                                                                                                                                               |
| Apnt0641 CDS CDS     | 1.5  | 0.2   | 33.3  | P       | COG0614                                         | ABC-type Fe3+-hydroxamate transport system, periplasmic component                                                                                                                                                                                                                                                                    |
| TS28Bac1540 CDS CDS  | 35.7 | 5.0   | 32.4  | P       | COG4771                                         | Outer membrane receptor for ferrienterochelin and colicins                                                                                                                                                                                                                                                                           |
| Dfor0856 CDS CDS     | 7.0  | 1.0   | 31.8  | P       | COG3685 COG3546                                 | Uncharacterized protein conserved in bacterial Mn-containing catalase                                                                                                                                                                                                                                                                |
| Robe0204 CDS CDS     | 3.3  | 0.5   | 30.3  | P       | COG2116                                         | Formate/nitrite family of transporters                                                                                                                                                                                                                                                                                               |
| Bova3063 CDS CDS     | 2.1  | 0.3   | 28.4  | P       | COG2217                                         | Cation transport ATPase                                                                                                                                                                                                                                                                                                              |
| Buni3358 CDS CDS     | 9.0  | 1.5   | 27.2  | P       | COG0607 COG2210 COG0446                         | Rhodanese-related sulfurtransferase Uncharacterized conserved protein Uncharacterized NAD(FAD)-dependent dehydrogenases                                                                                                                                                                                                              |
| TS28Rum01418 CDS CDS | 10.5 | 2.0   | 23.8  | P       | COG0614                                         | ABC-type Fe3+-hydroxamate transport system, periplasmic component                                                                                                                                                                                                                                                                    |
| TS28Bac1463 CDS CDS  | 9.7  | 2.0   | 21.9  | P       | COG4771                                         | Outer membrane receptor for ferrienterochelin and colicins                                                                                                                                                                                                                                                                           |
| TS28Rum05937 CDS CDS | 14.0 | 3.0   | 21.2  | P       | COG0370 COG1918 COG0607 COG2210 COG0446         | Fe2+ transport system protein B Fe2+ transport system protein A Rhodanese-related sulfurtransferase Uncharacterized conserved protein Uncharacterized NAD(FAD)-dependent dehydrogenases                                                                                                                                              |
| BactD11122 CDS CDS   | 2.3  | 0.5   | 21.2  | P       | COG0446                                         | Uncharacterized conserved protein Uncharacterized NAD(FAD)-dependent dehydrogenases                                                                                                                                                                                                                                                  |
| Buni0931 CDS CDS     | 44.5 | 9.7   | 20.9  | P       | COG4771                                         | Outer membrane receptor for ferrienterochelin and colicins                                                                                                                                                                                                                                                                           |
| BactD11415 CDS CDS   | 11.1 | 2.6   | 19.5  | P       | COG4771                                         | Outer membrane receptor for ferrienterochelin and colicins                                                                                                                                                                                                                                                                           |
| TS28Bac1541 CDS CDS  | 12.0 | 2.8   | 19.2  | P       | COG4771                                         | Outer membrane receptor for ferrienterochelin and colicins                                                                                                                                                                                                                                                                           |
| Dlon1383 CDS CDS     | 2.0  | 0.5   | 18.2  | P       | COG0471 COG1055                                 | Di- and tricarboxylate transporters Na+/H+ antiporter NhaD and related arsenite permeases                                                                                                                                                                                                                                            |
| Dfor0125 CDS CDS     | 4.0  | 1.0   | 18.2  | P       | COG1918                                         | Fe2+ transport system protein A                                                                                                                                                                                                                                                                                                      |
| TS29Dor0201 CDS CDS  | 4.0  | 1.0   | 18.2  | P       | COG1393                                         | Arsenate reductase and related proteins, glutaredoxin family                                                                                                                                                                                                                                                                         |
| Bcap0267 CDS CDS     | 4.0  | 1.0   | 18.2  | P       | COG0474                                         | Cation transport ATPase                                                                                                                                                                                                                                                                                                              |
| Bxvl2985 CDS CDS     | 7.6  | 1.9   | 18.0  | P       | COG4771                                         | Outer membrane receptor for ferrienterochelin and colicins                                                                                                                                                                                                                                                                           |
| Buni2203 CDS CDS     | 1.5  | 0.4   | 17.0  | P       | COG0614                                         | ABC-type Fe3+-hydroxamate transport system, periplasmic component                                                                                                                                                                                                                                                                    |
| TS29Par954 CDS CDS   | 7.3  | 2.0   | 16.6  | P       | COG0783                                         | DNA-binding ferritin-like protein (oxidative damage protectant)                                                                                                                                                                                                                                                                      |
| Buni0832 CDS CDS     | 3.3  | 1.0   | 15.1  | P       | COG4771                                         | Outer membrane receptor for ferrienterochelin and colicins                                                                                                                                                                                                                                                                           |
| TS28Rum14589 CDS CDS | 6.5  | 2.0   | 14.8  | P       | COG0569                                         | K+ transport systems, NAD-binding component                                                                                                                                                                                                                                                                                          |
| Bconroc1932 CDS CDS  | 1.5  | 0.5   | 14.4  | P       | COG0614                                         | ABC-type Fe3+-hydroxamate transport system, periplasmic component                                                                                                                                                                                                                                                                    |
| Bsp1162029 CDS CDS   | 1.5  | 0.5   | 14.4  | P       | COG0614                                         | ABC-type Fe3+-hydroxamate transport system, periplasmic component                                                                                                                                                                                                                                                                    |
| ShigspD92315 CDS CDS | 3.0  | 1.0   | 13.6  | P       | COG0471                                         | Di- and tricarboxylate transporters                                                                                                                                                                                                                                                                                                  |
| TS28Clo02360 CDS CDS | 3.0  | 1.0   | 13.6  | P       | COG0053 COG1433                                 | Predicted Co/Zn/Cd cation transporters Uncharacterized conserved protein                                                                                                                                                                                                                                                             |
| ShigspD90925 CDS CDS | 1.5  | 0.5   | 13.6  | P       | COG4525 COG1116                                 | ABC-type taurine transport system, ATPase component ABC-type nitrate/sulfonate/bicarbonate transport system, ATPase component                                                                                                                                                                                                        |
| ShigspD90709 CDS CDS | 1.5  | 0.5   | 13.6  | P       | COG1055                                         | Na+/H+ antiporter NhaD and related arsenite permeases                                                                                                                                                                                                                                                                                |

|                      |      |       |      |   |                         |                                                                                                                                                                                                              |
|----------------------|------|-------|------|---|-------------------------|--------------------------------------------------------------------------------------------------------------------------------------------------------------------------------------------------------------|
| TS28Rum00210 CDS CDS | 4.5  | 1.5   | 13.6 | P | COG0725                 | ABC-type molybdate transport system, periplasmic component                                                                                                                                                   |
| BactD11685 CDS CDS   | 2.0  | 0.7   | 13.4 | P | COG2239                 | Mg/Co/Ni transporter MgtE (contains CBS domain)                                                                                                                                                              |
| ShiispD91055 CDS CDS | 2.8  | 1.0   | 12.9 | P | COG3696                 | Putative silver efflux pump                                                                                                                                                                                  |
| TS29Rum05301 CDS CDS | 2.3  | 0.8   | 12.7 | P | COG0855                 | Polyphosphate kinase                                                                                                                                                                                         |
| TS28Bac7204 CDS CDS  | 2.7  | 1.0   | 12.1 | P | COG4771                 | Outer membrane receptor for ferrienterochelin and colicins                                                                                                                                                   |
| Robo0057 CDS CDS     | 84.4 | 32.0  | 12.0 | P | COG2703                 | Hemerythrin                                                                                                                                                                                                  |
| Aput0984 CDS CDS     | 21.0 | 8.0   | 11.9 | P | COG4771                 | Outer membrane receptor for ferrienterochelin and colicins                                                                                                                                                   |
| TS29Bac10830 CDS CDS | 62.5 | 24.3  | 11.7 | P | COG4771                 | Outer membrane receptor for ferrienterochelin and colicins                                                                                                                                                   |
| Bova3763 CDS CDS     | 18.8 | 7.4   | 11.5 | P | COG4771                 | Outer membrane receptor for ferrienterochelin and colicins                                                                                                                                                   |
| Chol4986 CDS CDS     | 5.0  | 2.0   | 11.3 | P | COG0725                 | ABC-type molybdate transport system, periplasmic component                                                                                                                                                   |
| Cste0032 CDS CDS     | 2.5  | 1.0   | 11.3 | P | COG0474                 | Cation transport ATPase                                                                                                                                                                                      |
| Cbol3683 CDS CDS     | 5.0  | 2.0   | 11.3 | P | COG1253 COG4536         | Hemolysins and related proteins containing CBS domains Putative Mg2+ and Co2+ transporter CorB                                                                                                               |
| BactD11323 CDS CDS   | 1.5  | 0.6   | 11.3 | P | COG0614                 | ABC-type Fe3+-hydroxamate transport system, periplasmic component                                                                                                                                            |
| Bxyl1218 CDS CDS     | 1.5  | 0.6   | 11.3 | P | COG0614                 | ABC-type Fe3+-hydroxamate transport system, periplasmic component                                                                                                                                            |
| TS28Clo09514 CDS CDS | 7.0  | 3.0   | 10.6 | P | COG0715                 | ABC-type nitrate/sulfonate/bicarbonate transport systems, periplasmic components                                                                                                                             |
| TS28Fae01771 CDS CDS | 1.0  | 46.0  | 0.1  | P | COG0530                 | Ca2+/Na+ antiporter                                                                                                                                                                                          |
| TS29Bac01889 CDS CDS | 0.8  | 38.3  | 0.1  | P | COG4771                 | Outer membrane receptor for ferrienterochelin and colicins                                                                                                                                                   |
| Bxyl1533 CDS CDS     | 1.5  | 23.5  | 0.1  | P | COG0474                 | Cation transport ATPase                                                                                                                                                                                      |
| TS28Fae16666 CDS CDS | 0.5  | 23.5  | 0.1  | P | COG1464                 | ABC-type metal ion transport system, periplasmic component/surface antigen                                                                                                                                   |
| TS29Rum11503 CDS CDS | 0.5  | 24.0  | 0.1  | P | COG0619                 | ABC-type cobalt transport system, permease component CbiQ and related transporters                                                                                                                           |
| TS28Fae02401 CDS CDS | 0.5  | 24.0  | 0.1  | P | COG0370 COG1918         | Fe2+ transport system protein B Fe2+ transport system protein A                                                                                                                                              |
| TS29Bac00257 CDS CDS | 0.3  | 16.3  | 0.1  | P | COG3004                 | Na+/H+ antiporter                                                                                                                                                                                            |
| TS29Bac00568 CDS CDS | 0.4  | 19.8  | 0.1  | P | COG4771                 | Outer membrane receptor for ferrienterochelin and colicins                                                                                                                                                   |
| TS28Bif2077 CDS CDS  | 0.5  | 24.8  | 0.1  | P | COG0855                 | Polyphosphate kinase                                                                                                                                                                                         |
| TS29Bac09378 CDS CDS | 0.5  | 25.0  | 0.1  | P | COG1629                 | Outer membrane receptor proteins, mostly Fe transport                                                                                                                                                        |
| TS29Bac03557 CDS CDS | 0.5  | 25.2  | 0.1  | P | COG4771                 | Outer membrane receptor for ferrienterochelin and colicins                                                                                                                                                   |
| TS29Bac08851 CDS CDS | 0.3  | 12.7  | 0.1  | P | COG1629                 | Outer membrane receptor proteins, mostly Fe transport                                                                                                                                                        |
| TS29Bac01564 CDS CDS | 0.3  | 17.0  | 0.1  | P | COG4771                 | Outer membrane receptor for ferrienterochelin and colicins                                                                                                                                                   |
| Dlon1344 CDS CDS     | 0.2  | 10.3  | 0.1  | P | COG4172 COG1122         | ABC-type uncharacterized transport system, duplicated ATPase component ABC-type cobalt transport system, ATPase component                                                                                    |
| TS28Bif0561 CDS CDS  | 1.3  | 65.2  | 0.1  | P | COG0025                 | NhaP-type Na+/H+ and K+/H+ antiporters                                                                                                                                                                       |
| TS28Bif0752 CDS CDS  | 0.5  | 26.3  | 0.1  | P | COG0704                 | Phosphate uptake regulator                                                                                                                                                                                   |
| TS29Bif3851 CDS CDS  | 0.5  | 26.3  | 0.1  | P | COG0704                 | Phosphate uptake regulator                                                                                                                                                                                   |
| Dfor0464 CDS CDS     | 0.3  | 17.5  | 0.1  | P | COG2217                 | Cation transport ATPase                                                                                                                                                                                      |
| TS28Fae17862 CDS CDS | 1.5  | 79.0  | 0.1  | P | COG0025                 | NhaP-type Na+/H+ and K+/H+ antiporters                                                                                                                                                                       |
| TS29Bac07894 CDS CDS | 0.5  | 27.0  | 0.1  | P | COG1629                 | Outer membrane receptor proteins, mostly Fe transport                                                                                                                                                        |
| Dfor0169 CDS CDS     | 1.3  | 69.8  | 0.1  | P | COG0607 COG2210 COG446  | Rhodanese-related sulfurtransferase Uncharacterized conserved protein Uncharacterized NAD(FAD)-dependent dehydrogenases                                                                                      |
| TS29Bac02235 CDS CDS | 0.8  | 42.3  | 0.1  | P | COG4771                 | Outer membrane receptor for ferrienterochelin and colicins                                                                                                                                                   |
| TS29Bac05029 CDS CDS | 0.3  | 19.0  | 0.1  | P | COG4771                 | Outer membrane receptor for ferrienterochelin and colicins                                                                                                                                                   |
| TS29Fae06759 CDS CDS | 1.0  | 57.5  | 0.1  | P | COG1253 COG4536         | Hemolysins and related proteins containing CBS domains Putative Mg2+ and Co2+ transporter CorB                                                                                                               |
| TS29Bac05005 CDS CDS | 0.5  | 29.5  | 0.1  | P | COG0474                 | Cation transport ATPase                                                                                                                                                                                      |
| TS29Bif0690 CDS CDS  | 2.6  | 152.5 | 0.1  | P | COG2217                 | Cation transport ATPase                                                                                                                                                                                      |
| CspS21658 CDS CDS    | 0.3  | 20.0  | 0.1  | P | COG2217                 | Cation transport ATPase                                                                                                                                                                                      |
| TS29Fae00780 CDS CDS | 1.5  | 90.5  | 0.1  | P | COG0053 COG1433         | Predicted Co/Zn/Cd cation transporters Uncharacterized conserved protein                                                                                                                                     |
| TS29Bac10197 CDS CDS | 0.5  | 30.3  | 0.1  | P | COG4771                 | Outer membrane receptor for ferrienterochelin and colicins                                                                                                                                                   |
| TS29Bac04473 CDS CDS | 0.3  | 20.3  | 0.1  | P | COG4771                 | Outer membrane receptor for ferrienterochelin and colicins                                                                                                                                                   |
| TS29Rum20623 CDS CDS | 1.0  | 62.0  | 0.1  | P | COG0855                 | Polyphosphate kinase                                                                                                                                                                                         |
| TS28Fae21563 CDS CDS | 0.3  | 21.0  | 0.1  | P | COG0569                 | K+ transport systems, NAD-binding component                                                                                                                                                                  |
| Bxyl4192 CDS CDS     | 0.4  | 25.8  | 0.1  | P | COG4771                 | Outer membrane receptor for ferrienterochelin and colicins                                                                                                                                                   |
| TS28Fae10075 CDS CDS | 0.3  | 21.5  | 0.1  | P | COG2217                 | Cation transport ATPase                                                                                                                                                                                      |
| TS29C0l0235 CDS CDS  | 1.0  | 65.0  | 0.1  | P | COG2217                 | Cation transport ATPase                                                                                                                                                                                      |
| TS29Rum17043 CDS CDS | 1.0  | 65.0  | 0.1  | P | COG1613 COG4150         | ABC-type sulfate transport system, periplasmic component ABC-type sulfate transport system, periplasmic component                                                                                            |
| TS29Rum15278 CDS CDS | 1.0  | 65.5  | 0.1  | P | COG0370 COG1918         | Fe2+ transport system protein B Fe2+ transport system protein A                                                                                                                                              |
| EnraM2120536 CDS CDS | 1.0  | 70.0  | 0.1  | P | COG0530                 | Ca2+/Na+ antiporter                                                                                                                                                                                          |
| TS29Bac10034 CDS CDS | 0.7  | 47.8  | 0.1  | P | COG4771                 | Outer membrane receptor for ferrienterochelin and colicins                                                                                                                                                   |
| TS29Bac10803 CDS CDS | 0.5  | 36.5  | 0.1  | P | COG2217 COG2216         | Cation transport ATPase High-affinity K+ transport system, ATPase chain B                                                                                                                                    |
| TS28Fae11140 CDS CDS | 0.1  | 7.0   | 0.1  | P | COG1117                 | ABC-type phosphate transport system, ATPase component                                                                                                                                                        |
| TS28Fae21503 CDS CDS | 0.5  | 40.5  | 0.1  | P | COG0370 COG1918         | Fe2+ transport system protein B Fe2+ transport system protein A                                                                                                                                              |
| TS29C0l0741 CDS CDS  | 0.5  | 43.0  | 0.1  | P | COG3004                 | Na+/H+ antiporter                                                                                                                                                                                            |
| TS29Bif3201 CDS CDS  | 0.6  | 53.5  | 0.1  | P | COG0861                 | Membrane protein TerC, possibly involved in tellurium resistance                                                                                                                                             |
| TS28Bif4600 CDS CDS  | 0.6  | 53.5  | 0.1  | P | COG0861                 | Membrane protein TerC, possibly involved in tellurium resistance                                                                                                                                             |
| BL1038 CDS Pacl2     | 0.3  | 22.7  | 0.1  | P | COG0474                 | Cation transport ATPase                                                                                                                                                                                      |
| TS29C0l0056 CDS CDS  | 1.0  | 91.0  | 0.0  | P | COG0370 COG1918         | Fe2+ transport system protein B Fe2+ transport system protein A                                                                                                                                              |
| TS29Bif3321 CDS CDS  | 0.5  | 48.0  | 0.0  | P | COG0168                 | Trk-type K+ transport systems, membrane components                                                                                                                                                           |
| TS28Bif4727 CDS CDS  | 0.5  | 48.0  | 0.0  | P | COG0168                 | Trk-type K+ transport systems, membrane components                                                                                                                                                           |
| TS29Fae08645 CDS CDS | 1.5  | 145.0 | 0.0  | P | COG2217                 | Cation transport ATPase                                                                                                                                                                                      |
| TS29Fae00225 CDS CDS | 1.5  | 145.5 | 0.0  | P | COG2217                 | Cation transport ATPase                                                                                                                                                                                      |
| TS28Fae12478 CDS CDS | 0.1  | 9.0   | 0.0  | P | COG1117                 | ABC-type phosphate transport system, ATPase component                                                                                                                                                        |
| TS28Bif1089 CDS CDS  | 0.8  | 78.7  | 0.0  | P | COG0004                 | Ammonia permease                                                                                                                                                                                             |
| TS29Bif0665 CDS CDS  | 0.8  | 78.7  | 0.0  | P | COG0004                 | Ammonia permease                                                                                                                                                                                             |
| TS29C0l1439 CDS CDS  | 0.5  | 53.0  | 0.0  | P | COG2239                 | Mg/Co/Ni transporter MgtE (contains CBS domain)                                                                                                                                                              |
| TS29Bif0431 CDS CDS  | 1.3  | 139.0 | 0.0  | P | COG0025                 | NhaP-type Na+/H+ and K+/H+ antiporters                                                                                                                                                                       |
| TS28Bif4447 CDS CDS  | 0.2  | 25.9  | 0.0  | P | COG0783                 | DNA-binding ferritin-like protein (oxidative damage protectant)                                                                                                                                              |
| TS29Bif0493 CDS CDS  | 0.2  | 25.9  | 0.0  | P | COG0783                 | DNA-binding ferritin-like protein (oxidative damage protectant)                                                                                                                                              |
| TS29Fae04753 CDS CDS | 0.5  | 72.0  | 0.0  | P | COG0569                 | K+ transport systems, NAD-binding component                                                                                                                                                                  |
| TS29Bif3206 CDS CDS  | 0.3  | 37.9  | 0.0  | P | COG0803                 | ABC-type metal ion transport system, periplasmic component/surface adhesin                                                                                                                                   |
| TS28Bif3287 CDS CDS  | 0.3  | 42.6  | 0.0  | P | COG3004                 | Na+/H+ antiporter                                                                                                                                                                                            |
| TS29Bac02117 CDS CDS | 0.3  | 57.5  | 0.0  | P | COG4771                 | Outer membrane receptor for ferrienterochelin and colicins                                                                                                                                                   |
| TS29Rum13846 CDS CDS | 0.5  | 93.0  | 0.0  | P | COG1055                 | Na+/H+ antiporter NhaD and related arsenite permeases                                                                                                                                                        |
| TS29Bif1132 CDS CDS  | 0.3  | 62.0  | 0.0  | P | COG0855                 | Polyphosphate kinase                                                                                                                                                                                         |
| TS29Bif3625 CDS CDS  | 0.8  | 162.1 | 0.0  | P | COG0855                 | Polyphosphate kinase                                                                                                                                                                                         |
| TS29Bif0494 CDS CDS  | 1.0  | 196.5 | 0.0  | P | COG1253 COG4536         | Hemolysins and related proteins containing CBS domains Putative Mg2+ and Co2+ transporter CorB                                                                                                               |
| TS28Bif4606 CDS CDS  | 0.3  | 65.9  | 0.0  | P | COG0803                 | ABC-type metal ion transport system, periplasmic component/surface adhesin                                                                                                                                   |
| TS29Bif3043 CDS CDS  | 0.3  | 81.6  | 0.0  | P | COG3004                 | Na+/H+ antiporter                                                                                                                                                                                            |
| TS29Bif0560 CDS CDS  | 0.5  | 194.8 | 0.0  | P | COG2217                 | Cation transport ATPase                                                                                                                                                                                      |
| TS29Rum19591 CDS CDS | 0.2  | 78.3  | 0.0  | P | COG1123 COG1122 COG4172 | ATPase components of various ABC-type transport systems, contain duplicated ATPase ABC-type cobalt transport system, ATPase component ABC-type uncharacterized transport system, duplicated ATPase component |

|                      |       |       |       |         |                                                         |                                                                                                                                                                                                                                                                                                                                                                                                                                             |
|----------------------|-------|-------|-------|---------|---------------------------------------------------------|---------------------------------------------------------------------------------------------------------------------------------------------------------------------------------------------------------------------------------------------------------------------------------------------------------------------------------------------------------------------------------------------------------------------------------------------|
| TS29Bif314 CDS CDS   | 0.3   | 102.7 | 0.0   | P       | COG0474                                                 | Cation transport ATPase                                                                                                                                                                                                                                                                                                                                                                                                                     |
| TS28Bif4716 CDS CDS  | 0.3   | 126.7 | 0.0   | P       | COG0474                                                 | Cation transport ATPase                                                                                                                                                                                                                                                                                                                                                                                                                     |
| Dlon1716 CDS CDS     | 4.0   | 1.0   | 18.2  | P C     | COG2710 COG1348                                         | Nitrogenase molybdenum-iron protein, alpha and beta chains Nitrogenase subunit NifH (ATPase)                                                                                                                                                                                                                                                                                                                                                |
| TS28Fae09778 CDS CDS | 8.0   | 1.0   | 36.3  | P D     | COG2884 COG2177 COG1135                                 | Predicted ATPase involved in cell division Cell division protein ABC-type metal ion transport system, ATPase component                                                                                                                                                                                                                                                                                                                      |
| Dfor2414 CDS CDS     | 3.0   | 1.0   | 13.6  | P D     | COG1135 COG2884 COG2177                                 | ABC-type metal ion transport system, ATPase component Predicted ATPase involved in cell division Cell division protein                                                                                                                                                                                                                                                                                                                      |
| Rior1523 CDS CDS     | 3.0   | 0.5   | 27.2  | P E     | COG1173                                                 | ABC-type dipeptide/oligopeptide/nickel transport systems, permease components                                                                                                                                                                                                                                                                                                                                                               |
| Cste1321 CDS CDS     | 5.0   | 1.0   | 22.7  | P E     | COG0601                                                 | ABC-type dipeptide/oligopeptide/nickel transport systems, permease components                                                                                                                                                                                                                                                                                                                                                               |
| Aput1512 CDS CDS     | 4.0   | 1.0   | 18.2  | P E G   | COG0477                                                 | Permeases of the major facilitator superfamily                                                                                                                                                                                                                                                                                                                                                                                              |
| BactD11807 CDS CDS   | 3.0   | 0.8   | 16.3  | P E G   | COG0477                                                 | Permeases of the major facilitator superfamily                                                                                                                                                                                                                                                                                                                                                                                              |
| Bova3703 CDS CDS     | 3.5   | 1.0   | 15.9  | P E G   | COG0477                                                 | Permeases of the major facilitator superfamily                                                                                                                                                                                                                                                                                                                                                                                              |
| BactD12837 CDS CDS   | 3.0   | 1.0   | 13.6  | P E G   | COG0477                                                 | Permeases of the major facilitator superfamily                                                                                                                                                                                                                                                                                                                                                                                              |
| Aput0386 CDS CDS     | 6.0   | 2.0   | 13.6  | P E G   | COG0477                                                 | Permeases of the major facilitator superfamily                                                                                                                                                                                                                                                                                                                                                                                              |
| BactD11455 CDS CDS   | 3.3   | 1.5   | 10.1  | P E G   | COG0477                                                 | Permeases of the major facilitator superfamily                                                                                                                                                                                                                                                                                                                                                                                              |
| Bbre0851 CDS CDS     | 0.1   | 5.3   | 0.1   | P E G   | COG0477                                                 | Permeases of the major facilitator superfamily                                                                                                                                                                                                                                                                                                                                                                                              |
| BactD10045 CDS CDS   | 6.5   | 2.5   | 11.8  | P E Q   | COG1126 COG1135 COG4175 COG1127 COG4598                 | ABC-type polar amino acid transport system, ATPase component ABC-type metal ion transport system, ATPase component ABC-type proline/glycine betaine transport system, ATPase component ABC-type transport system involved in resistance to organic solvents, ATPase component ABC-type histidine transport system, ATPase component                                                                                                         |
| Casp1491 CDS CDS     | 179.0 | 3.0   | 270.9 | P H     | COG0607 COG0301                                         | Rhodanese-related sulfurtransferase Thiamine biosynthesis ATP pyrophosphatase                                                                                                                                                                                                                                                                                                                                                               |
| Cbol5280 CDS CDS     | 5.0   | 1.0   | 22.7  | P H     | COG0607 COG0301                                         | Rhodanese-related sulfurtransferase Thiamine biosynthesis ATP pyrophosphatase                                                                                                                                                                                                                                                                                                                                                               |
| Bun12204 CDS CDS     | 5.1   | 2.0   | 11.7  | P H     | COG4771 COG4206                                         | Outer membrane receptor for ferrienterochelin and colicins Outer membrane cobalamin receptor protein                                                                                                                                                                                                                                                                                                                                        |
| TS29Ceo0997 CDS CDS  | 0.5   | 34.0  | 0.1   | P H     | COG0303 COG1763 COG1910                                 | Molybdopterin biosynthesis enzyme Molybdopterin-guanine dinucleotide biosynthesis protein Periplasmic molybdate-binding protein/domain                                                                                                                                                                                                                                                                                                      |
| TS28Bif4607 CDS CDS  | 0.3   | 17.6  | 0.1   | P H V   | COG1136 COG1121 COG1120 COG1865 COG1118 COG1116 COG3638 | ABC-type antimicrobial peptide transport system, ATPase component ABC-type Mn/Zn transport systems, ATPase component ABC-type cobalamin/Fe3+-siderophores transport systems, ATPase components Uncharacterized conserved protein ABC-type sulfate/molybdate transport systems, ATPase component ABC-type nitrate/sulfonate/bicarbonate transport system, ATPase component ABC-type phosphate/phosphonate transport system, ATPase component |
| TS29Bif3207 CDS CDS  | 0.3   | 17.6  | 0.1   | P H V   | COG1136 COG1121 COG1120 COG1865 COG1118 COG1116 COG3638 | ABC-type antimicrobial peptide transport system, ATPase component ABC-type Mn/Zn transport systems, ATPase component ABC-type cobalamin/Fe3+-siderophores transport systems, ATPase components Uncharacterized conserved protein ABC-type sulfate/molybdate transport systems, ATPase component ABC-type nitrate/sulfonate/bicarbonate transport system, ATPase component ABC-type phosphate/phosphonate transport system, ATPase component |
| TS28Fae00228 CDS CDS | 4.5   | 0.5   | 40.9  | P I     | COG0657 COG2072                                         | Esterase/lipase Predicted flavoprotein involved in K+ transport                                                                                                                                                                                                                                                                                                                                                                             |
| TS29Bif3388 CDS CDS  | 0.3   | 35.5  | 0.0   | P I     | COG0657 COG2072                                         | Esterase/lipase Predicted flavoprotein involved in K+ transport                                                                                                                                                                                                                                                                                                                                                                             |
| TS28Ceo07100 CDS CDS | 8.0   | 1.0   | 36.3  | P J     | COG0566 COG0474                                         | rRNA methylases Cation transport ATPase                                                                                                                                                                                                                                                                                                                                                                                                     |
| TS29Fae08579 CDS CDS | 2.0   | 163.5 | 0.1   | P J     | COG0566 COG0474                                         | rRNA methylases Cation transport ATPase                                                                                                                                                                                                                                                                                                                                                                                                     |
| TS29Bif2507 CDS CDS  | 0.3   | 33.1  | 0.0   | P J     | COG0566 COG0474 COG2217                                 | rRNA methylases Cation transport ATPase Cation transport ATPase                                                                                                                                                                                                                                                                                                                                                                             |
| Aput1589 CDS CDS     | 5.0   | 2.0   | 11.3  | P K H C | COG0543 COG2871 COG2186 COG1018 COG0369                 | 2-polypropenylphenol hydroxylase and related flavodoxin oxidoreductases Na+-transporting NADH:ubiquinone oxidoreductase, subunit NqrF Transcriptional regulators Flavodoxin reductases (ferredoxin-NADPH reductases) family 1 Sulfite reductase, alpha subunit (flavoprotein)                                                                                                                                                               |
| Bxyl0400 CDS CDS     | 1.6   | 0.5   | 14.5  | P L C V | COG3666 COG1131 COG4555 COG4152                         | Transposase and inactivated derivatives ABC-type multidrug transport system, ATPase component ABC-type Na+ transport system, ATPase component ABC-type uncharacterized transport system, ATPase component                                                                                                                                                                                                                                   |
| TS28Fae14027 CDS CDS | 2.5   | 0.5   | 22.7  | P M     | COG0226 COG2885                                         | ABC-type phosphate transport system, periplasmic component Outer membrane protein and related peptidoglycan-associated (lipo)proteins                                                                                                                                                                                                                                                                                                       |
| TS28Fae03517 CDS CDS | 9.0   | 2.0   | 20.4  | P M     | COG0226 COG2885                                         | ABC-type phosphate transport system, periplasmic component Outer membrane protein and related peptidoglycan-associated (lipo)proteins                                                                                                                                                                                                                                                                                                       |
| Bxyl1504 CDS CDS     | 0.1   | 6.0   | 0.1   | P M     | COG0226 COG2885                                         | ABC-type phosphate transport system, periplasmic component Outer membrane protein and related peptidoglycan-associated (lipo)proteins                                                                                                                                                                                                                                                                                                       |
| BactD11203 CDS CDS   | 0.1   | 8.0   | 0.1   | P M     | COG0226 COG2885                                         | ABC-type phosphate transport system, periplasmic component Outer membrane protein and related peptidoglycan-associated (lipo)proteins                                                                                                                                                                                                                                                                                                       |
| TS29Rum21222 CDS CDS | 0.3   | 17.0  | 0.1   | P Q V   | COG1136 COG1135 COG4181                                 | ABC-type antimicrobial peptide transport system, ATPase component ABC-type metal ion transport system, ATPase component Predicted ABC-type transport system involved in lysophospholipase L1 biosynthesis, ATPase component                                                                                                                                                                                                                 |
| TS28Rum13513 CDS CDS | 0.3   | 20.0  | 0.1   | P Q V   | COG1136 COG1135 COG4181                                 | ABC-type antimicrobial peptide transport system, ATPase component ABC-type metal ion transport system, ATPase component Predicted ABC-type transport system involved in lysophospholipase L1 biosynthesis, ATPase component                                                                                                                                                                                                                 |
| Bun12419 CDS CDS     | 2.0   | 0.5   | 18.2  | P T     | COG3712                                                 | Fe2+-dicitrate sensor, membrane component                                                                                                                                                                                                                                                                                                                                                                                                   |
| TS28Rum06092 CDS CDS | 2.0   | 0.5   | 18.2  | P T     | COG0038 COG0517 COG0589                                 | Chloride channel protein EriC FOG: CBS domain Universal stress protein UspA and related nucleotide-binding proteins                                                                                                                                                                                                                                                                                                                         |
| Bun10180 CDS CDS     | 3.0   | 0.8   | 16.3  | P T     | COG0589 COG0475                                         | Universal stress protein UspA and related nucleotide-binding proteins Kef-type K+ transport systems, membrane components                                                                                                                                                                                                                                                                                                                    |
| TS28Eub6565 CDS CDS  | 1.7   | 0.5   | 15.1  | P T     | COG3887 COG1226                                         | Predicted signaling protein consisting of a modified GGDEF domain and a DHH domain Kef-type K+ transport systems, predicted NAD-binding component                                                                                                                                                                                                                                                                                           |
| TS28Fae07803 CDS CDS | 10.5  | 3.5   | 13.6  | P T     | COG3887 COG1226                                         | Predicted signaling protein consisting of a modified GGDEF domain and a DHH domain Kef-type K+ transport systems, predicted NAD-binding component                                                                                                                                                                                                                                                                                           |
| TS29Bac11361 CDS CDS | 0.5   | 29.4  | 0.1   | P T     | COG0569 COG0589 COG0475                                 | K+ transport systems, NAD-binding component Universal stress protein UspA and related nucleotide-binding proteins Kef-type K+ transport systems, membrane components                                                                                                                                                                                                                                                                        |
| TS29Bac09700 CDS CDS | 0.3   | 20.0  | 0.1   | P T     | COG0569 COG0589 COG0475                                 | K+ transport systems, NAD-binding component Universal stress protein UspA and related nucleotide-binding proteins Kef-type K+ transport systems, membrane components                                                                                                                                                                                                                                                                        |
| Bun12748 CDS CDS     | 2.3   | 1.0   | 10.6  | P V     | COG0841 COG3696                                         | Cation/multidrug efflux pump Putative silver efflux pump                                                                                                                                                                                                                                                                                                                                                                                    |
| TS29Fae01231 CDS CDS | 3.0   | 142.0 | 0.1   | P V     | COG0841 COG3696                                         | Cation/multidrug efflux pump Putative silver efflux pump                                                                                                                                                                                                                                                                                                                                                                                    |

|                        |      |       |       |       |                                                                                     |                                                                                                                                                                                                                                                                                                                                                                      |
|------------------------|------|-------|-------|-------|-------------------------------------------------------------------------------------|----------------------------------------------------------------------------------------------------------------------------------------------------------------------------------------------------------------------------------------------------------------------------------------------------------------------------------------------------------------------|
| Edo10091 CDS CDS       | 1.0  | 47.5  | 0.1   | P V   | COG1132 COG2375                                                                     | ABC-type multidrug transport system, ATPase and permease components Siderophore-interacting protein                                                                                                                                                                                                                                                                  |
| Ceut1709 CDS CDS       | 0.3  | 15.0  | 0.1   | P V Q | COG1136 COG4181<br>COG1135                                                          | ABC-type antimicrobial peptide transport system, ATPase component Predicted ABC-type transport system involved in lysophospholipase L1 biosynthesis, ATPase component ABC-type metal ion transport system, ATPase component                                                                                                                                          |
| TS28Fae00474 CDS CDS   | 8.3  | 0.5   | 75.7  | Q     | COG3882                                                                             | Predicted enzyme involved in methoxymalonyl-ACP biosynthesis                                                                                                                                                                                                                                                                                                         |
| TS29RumUnc0371 CDS CDS | 41.3 | 3.5   | 53.6  | Q     | COG4909                                                                             | Propanediol dehydratase, large subunit                                                                                                                                                                                                                                                                                                                               |
| TS28Eub0622 CDS CDS    | 4.5  | 0.5   | 40.9  | Q     | COG4909                                                                             | Propanediol dehydratase, large subunit                                                                                                                                                                                                                                                                                                                               |
| Robe3274 CDS CDS       | 4.5  | 0.5   | 40.9  | Q     | COG4869                                                                             | Propanediol utilization protein                                                                                                                                                                                                                                                                                                                                      |
| Chol2174 CDS CDS       | 7.0  | 1.0   | 31.8  | Q     | COG1020                                                                             | Non-ribosomal peptide synthetase modules and related proteins                                                                                                                                                                                                                                                                                                        |
| TS29RumUnc0370 CDS CDS | 26.3 | 4.0   | 29.9  | Q     | COG4910                                                                             | Propanediol dehydratase, small subunit                                                                                                                                                                                                                                                                                                                               |
| TS29RumUnc0372 CDS CDS | 36.0 | 7.5   | 21.8  | Q     | COG4909                                                                             | Propanediol dehydratase, large subunit                                                                                                                                                                                                                                                                                                                               |
| Ehal0411 CDS CDS       | 6.0  | 1.5   | 18.2  | Q     | COG4909                                                                             | Propanediol dehydratase, large subunit                                                                                                                                                                                                                                                                                                                               |
| Bcap0189 CDS CDS       | 17.0 | 5.0   | 15.4  | Q     | COG2313                                                                             | Uncharacterized enzyme involved in pigment biosynthesis                                                                                                                                                                                                                                                                                                              |
| TS28Fae07700 CDS CDS   | 1.7  | 0.5   | 15.1  | Q     | COG0500                                                                             | SAM-dependent methyltransferases                                                                                                                                                                                                                                                                                                                                     |
| Rena1124 CDS CDS       | 1.5  | 0.5   | 13.6  | Q     | COG4909                                                                             | Propanediol dehydratase, large subunit                                                                                                                                                                                                                                                                                                                               |
| Rena1123 CDS CDS       | 3.0  | 1.0   | 13.6  | Q     | COG4909                                                                             | Propanediol dehydratase, large subunit                                                                                                                                                                                                                                                                                                                               |
| Chol3567 CDS CDS       | 3.0  | 1.0   | 13.6  | Q     | COG0500                                                                             | SAM-dependent methyltransferases                                                                                                                                                                                                                                                                                                                                     |
| TS28Rum15590 CDS CDS   | 5.5  | 2.0   | 12.5  | Q     | COG0500                                                                             | SAM-dependent methyltransferases                                                                                                                                                                                                                                                                                                                                     |
| TS28Rum15625 CDS CDS   | 23.0 | 9.5   | 11.0  | Q     | COG4869                                                                             | Propanediol utilization protein                                                                                                                                                                                                                                                                                                                                      |
| TS29Rum07213 CDS CDS   | 9.0  | 4.0   | 10.2  | Q     | COG1020 COG3321<br>COG3319 COG3320                                                  | Non-ribosomal peptide synthetase modules and related proteins Polyketide synthase modules and related proteins Thioesterase domains of type I polyketide synthases or non-ribosomal peptide synthetases Putative dehydrogenase domain of multifunctional non-ribosomal peptide synthetases and related enzymes                                                       |
| TS29Bif0384 CDS CDS    | 3.0  | 147.0 | 0.1   | Q     | COG2931                                                                             | RTX toxins and related Ca <sup>2+</sup> -binding proteins                                                                                                                                                                                                                                                                                                            |
| TS29Bac03301 CDS CDS   | 1.0  | 51.0  | 0.1   | Q     | COG3882                                                                             | Predicted enzyme involved in methoxymalonyl-ACP biosynthesis                                                                                                                                                                                                                                                                                                         |
| TS29Rum19598 CDS CDS   | 2.0  | 123.0 | 0.1   | Q     | COG1020 COG3321<br>COG3319 COG3208<br>COG3433                                       | Non-ribosomal peptide synthetase modules and related proteins Polyketide synthase modules and related proteins Thioesterase domains of type I polyketide synthases or non-ribosomal peptide synthetases Predicted thioesterase involved in non-ribosomal peptide biosynthesis Aryl carrier domain                                                                    |
| TS29Bif1003 CDS CDS    | 0.7  | 44.3  | 0.1   | Q     | COG0500                                                                             | SAM-dependent methyltransferases                                                                                                                                                                                                                                                                                                                                     |
| TS29Rum01250 CDS CDS   | 0.7  | 45.8  | 0.1   | Q     | COG1020 COG3321<br>COG3319 COG3320                                                  | Non-ribosomal peptide synthetase modules and related proteins Polyketide synthase modules and related proteins Thioesterase domains of type I polyketide synthases or non-ribosomal peptide synthetases Putative dehydrogenase domain of multifunctional non-ribosomal peptide synthetases and related enzymes                                                       |
| TS29Bif2614 CDS CDS    | 0.5  | 54.8  | 0.0   | Q     | COG1228                                                                             | Imidazolonepropionase and related amidohydrolases                                                                                                                                                                                                                                                                                                                    |
| TS29Bif3551 CDS CDS    | 0.3  | 96.5  | 0.0   | QV    | COG1136 COG4181                                                                     | ABC-type antimicrobial peptide transport system, ATPase component Predicted ABC-type transport system involved in lysophospholipase L1 biosynthesis, ATPase component                                                                                                                                                                                                |
| CspSS21278 CDS CDS     | 36.3 | 0.5   | 329.9 | T     | COG0642 COG2202<br>COG5002                                                          | Signal transduction histidine kinase FOG: PAS/PAC domain Signal transduction histidine kinase                                                                                                                                                                                                                                                                        |
| TS28Bac2716 CDS CDS    | 15.3 | 0.3   | 208.8 | T     | COG1875                                                                             | Predicted ATPase related to phosphate starvation-inducible protein PhoH                                                                                                                                                                                                                                                                                              |
| Bum13403 CDS CDS       | 33.3 | 1.8   | 82.5  | T     | COG1875 COG1702                                                                     | Predicted ATPase related to phosphate starvation-inducible protein PhoH Phosphate starvation-inducible protein PhoH, predicted ATPase                                                                                                                                                                                                                                |
| ShiespN09633 CDS CDS   | 6.0  | 0.3   | 81.7  | T     | COG0642                                                                             | Signal transduction histidine kinase                                                                                                                                                                                                                                                                                                                                 |
| Ceut1707 CDS CDS       | 6.3  | 0.5   | 56.7  | T     | COG0642 COG2202<br>COG5002 COG2770                                                  | Signal transduction histidine kinase FOG: PAS/PAC domain Signal transduction histidine kinase FOG: HAMP domain                                                                                                                                                                                                                                                       |
| RintL10992 CDS CDS     | 10.0 | 1.0   | 45.4  | T     | COG2310 COG4110                                                                     | Uncharacterized proteins involved in stress response, homologs of TerZ and putative cAMP-binding protein CABP1 Uncharacterized protein involved in stress response                                                                                                                                                                                                   |
| Caer2190 CDS CDS       | 4.5  | 0.5   | 40.9  | T     | COG1966                                                                             | Carbon starvation protein, predicted membrane protein                                                                                                                                                                                                                                                                                                                |
| Chol2858 CDS CDS       | 8.0  | 1.0   | 36.3  | T     | COG0784                                                                             | FOG: CheY-like receiver                                                                                                                                                                                                                                                                                                                                              |
| TS29Clo3308 CDS CDS    | 29.0 | 4.0   | 32.9  | T     | COG0642 COG5002<br>COG2205                                                          | Signal transduction histidine kinase Signal transduction histidine kinase Osmosensitive K <sup>+</sup> channel histidine kinase                                                                                                                                                                                                                                      |
| TS28Bac3380 CDS CDS    | 2.0  | 0.3   | 27.2  | T     | COG0589                                                                             | Universal stress protein UspA and related nucleotide-binding proteins                                                                                                                                                                                                                                                                                                |
| TS28Rum13607 CDS CDS   | 6.0  | 1.0   | 27.2  | T     | COG1702                                                                             | Phosphate starvation-inducible protein PhoH, predicted ATPase                                                                                                                                                                                                                                                                                                        |
| TS29Clo0517 CDS CDS    | 6.0  | 1.0   | 27.2  | T     | COG2172                                                                             | Anti-sigma regulatory factor (Ser/Thr protein kinase)                                                                                                                                                                                                                                                                                                                |
| TS28Dor2864 CDS CDS    | 6.0  | 1.0   | 27.2  | T     | COG0642 COG5002<br>COG2202 COG2203<br>COG3292                                       | Signal transduction histidine kinase Signal transduction histidine kinase FOG: PAS/PAC domain FOG: GAF domain Predicted periplasmic ligand-binding sensor domain                                                                                                                                                                                                     |
| TS29Par396 CDS CDS     | 5.0  | 1.0   | 22.7  | T     | COG4753                                                                             | Response regulator containing CheY-like receiver domain and AraC-type DNA-binding domain                                                                                                                                                                                                                                                                             |
| TS28Dor0301 CDS CDS    | 2.5  | 0.5   | 22.7  | T     | COG0642 COG5002<br>COG2202 COG2770<br>COG0784 COG3322<br>COG4251 COG2205<br>COG3447 | Signal transduction histidine kinase Signal transduction histidine kinase FOG: PAS/PAC domain FOG: HAMP domain FOG: CheY-like receiver Predicted periplasmic ligand-binding sensor domain Bacteriophytochrome (light-regulated signal transduction histidine kinase) Osmosensitive K <sup>+</sup> channel histidine kinase Predicted integral membrane sensor domain |
| TS29Bac07312 CDS CDS   | 50.3 | 10.8  | 21.1  | T     | COG1875 COG1702                                                                     | Predicted ATPase related to phosphate starvation-inducible protein PhoH Phosphate starvation-inducible protein PhoH, predicted ATPase                                                                                                                                                                                                                                |
| BactD22463 CDS CDS     | 1.2  | 0.3   | 20.9  | T     | COG2972 COG3275<br>COG5012                                                          | Predicted signal transduction protein with a C-terminal ATPase domain Putative regulator of cell autolysis Predicted cobalamin binding protein                                                                                                                                                                                                                       |
| TS28Dor2028 CDS CDS    | 2.0  | 0.5   | 18.2  | T     | COG0642 COG5002<br>COG2202 COG2770<br>COG0784 COG3292                               | Signal transduction histidine kinase Signal transduction histidine kinase FOG: PAS/PAC domain FOG: HAMP domain FOG: CheY-like receiver Predicted periplasmic ligand-binding sensor domain                                                                                                                                                                            |
| TS28Rum16392 CDS CDS   | 2.0  | 0.5   | 18.2  | T     | COG2172                                                                             | Anti-sigma regulatory factor (Ser/Thr protein kinase)                                                                                                                                                                                                                                                                                                                |
| Dlon0350 CDS CDS       | 4.0  | 1.0   | 18.2  | T     | COG0618 COG3887                                                                     | Exopolyphosphatase-related proteins Predicted signaling protein consisting of a modified GGDEF domain and a DHH domain                                                                                                                                                                                                                                               |
| TS28Rum14387 CDS CDS   | 3.5  | 1.0   | 15.9  | T     | COG1493                                                                             | Serine kinase of the HPr protein, regulates carbohydrate metabolism                                                                                                                                                                                                                                                                                                  |
| TS28Rum01816 CDS CDS   | 3.5  | 1.0   | 15.9  | T     | COG0642 COG5002<br>COG2202 COG2770                                                  | Signal transduction histidine kinase Signal transduction histidine kinase FOG: PAS/PAC domain FOG: HAMP domain                                                                                                                                                                                                                                                       |
| Dlon0876 CDS CDS       | 1.7  | 0.5   | 15.1  | T     | COG1493                                                                             | Serine kinase of the HPr protein, regulates carbohydrate metabolism                                                                                                                                                                                                                                                                                                  |
| TS28Dor0558 CDS CDS    | 1.7  | 0.5   | 15.1  | T     | COG1493                                                                             | Serine kinase of the HPr protein, regulates carbohydrate metabolism                                                                                                                                                                                                                                                                                                  |
| Begg0972 CDS CDS       | 10.0 | 3.0   | 15.1  | T     | COG3275                                                                             | Putative regulator of cell autolysis                                                                                                                                                                                                                                                                                                                                 |
| BactD10114 CDS CDS     | 5.7  | 1.8   | 14.1  | T     | COG1875 COG1702                                                                     | Predicted ATPase related to phosphate starvation-inducible protein PhoH Phosphate starvation-inducible protein PhoH, predicted ATPase                                                                                                                                                                                                                                |
| TS29Par236 CDS CDS     | 23.0 | 7.5   | 13.9  | T     | COG1875 COG1702                                                                     | Predicted ATPase related to phosphate starvation-inducible protein PhoH Phosphate starvation-inducible protein PhoH, predicted ATPase                                                                                                                                                                                                                                |



|                      |     |       |      |   |                                                                                         |                                                                                                                                                                                                                                                                                                                                                                                                                                                                                    |
|----------------------|-----|-------|------|---|-----------------------------------------------------------------------------------------|------------------------------------------------------------------------------------------------------------------------------------------------------------------------------------------------------------------------------------------------------------------------------------------------------------------------------------------------------------------------------------------------------------------------------------------------------------------------------------|
| TS28Bac4603 CDS CDS  | 1.0 | 0.3   | 13.6 | T | COG5002 COG4753 COG3292 COG3706                                                         | Signal transduction histidine kinase Response regulator containing CheY-like receiver domain and AraC-type DNA-binding domain Predicted periplasmic ligand-binding sensor domain Response regulator containing a CheY-like receiver domain and a GGDEF domain                                                                                                                                                                                                                      |
| TS28Bac3538 CDS CDS  | 1.0 | 0.3   | 13.6 | T | COG0642 COG5002                                                                         | Signal transduction histidine kinase Signal transduction histidine kinase                                                                                                                                                                                                                                                                                                                                                                                                          |
| Acac2081 CDS CDS     | 6.0 | 2.0   | 13.6 | T | COG2202 COG5278 COG3300 COG3706 COG5001 COG2199 COG4251 COG2200                         | FOG: PAS/PAC domain Predicted periplasmic ligand-binding sensor domain MHYT domain (predicted integral membrane sensor domain) Response regulator containing a CheY-like receiver domain and a GGDEF domain Predicted signal transduction protein containing a membrane domain, an EAL and a GGDEF domain FOG: GGDEF domain Bacteriophytochrome (light-regulated signal transduction histidine kinase) FOG: EAL domain                                                             |
| Cbol4133 CDS CDS     | 3.0 | 1.0   | 13.6 | T | COG1551                                                                                 | Carbon storage regulator (could also regulate swarming and quorum sensing)                                                                                                                                                                                                                                                                                                                                                                                                         |
| TS28Eub2068 CDS CDS  | 3.0 | 1.0   | 13.6 | T | COG1493                                                                                 | Serine kinase of the HPr protein, regulates carbohydrate metabolism                                                                                                                                                                                                                                                                                                                                                                                                                |
| TS28Col1553 CDS CDS  | 6.0 | 2.0   | 13.6 | T | COG1217                                                                                 | Predicted membrane GTPase involved in stress response                                                                                                                                                                                                                                                                                                                                                                                                                              |
| Dfor2384 CDS CDS     | 3.0 | 1.0   | 13.6 | T | COG0642 COG2202 COG5002 COG2770                                                         | Signal transduction histidine kinase FOG: PAS/PAC domain Signal transduction histidine kinase FOG: HAMP domain                                                                                                                                                                                                                                                                                                                                                                     |
| TS28Rum01417 CDS CDS | 3.0 | 1.0   | 13.6 | T | COG0631                                                                                 | Serine/threonine protein phosphatase                                                                                                                                                                                                                                                                                                                                                                                                                                               |
| TS29Bac07370 CDS CDS | 5.9 | 2.0   | 13.3 | T | COG2337                                                                                 | Growth inhibitor                                                                                                                                                                                                                                                                                                                                                                                                                                                                   |
| Aput0435 CDS CDS     | 8.0 | 3.0   | 12.1 | T | COG0618 COG3887                                                                         | Exopolyphosphatase-related proteins Predicted signaling protein consisting of a modified GGDEF domain and a DHH domain                                                                                                                                                                                                                                                                                                                                                             |
| ShigspD93102 CDS CDS | 2.5 | 1.0   | 11.3 | T | COG0642 COG2205                                                                         | Signal transduction histidine kinase Osmosensitive K+ channel histidine kinase                                                                                                                                                                                                                                                                                                                                                                                                     |
| Bxyl3946 CDS CDS     | 6.9 | 2.8   | 11.0 | T | COG1875 COG1702                                                                         | Predicted ATPase related to phosphate starvation-inducible protein PhoH Phosphate starvation-inducible protein PhoH, predicted ATPase                                                                                                                                                                                                                                                                                                                                              |
| TS28Rum15985 CDS CDS | 0.5 | 23.0  | 0.1  | T | COG2972                                                                                 | Predicted signal transduction protein with a C-terminal ATPase domain                                                                                                                                                                                                                                                                                                                                                                                                              |
| TS29Col1870 CDS CDS  | 1.0 | 46.5  | 0.1  | T | COG3275 COG2972 COG5012                                                                 | Putative regulator of cell autolysis Predicted signal transduction protein with a C-terminal ATPase domain Predicted cobalamin binding protein                                                                                                                                                                                                                                                                                                                                     |
| Even0457 CDS CDS     | 0.3 | 11.8  | 0.1  | T | COG0642 COG2202 COG5002 COG2205 COG4250                                                 | Signal transduction histidine kinase FOG: PAS/PAC domain Signal transduction histidine kinase Osmosensitive K+ channel histidine kinase Predicted sensor protein/domain                                                                                                                                                                                                                                                                                                            |
| TS29Fae08949 CDS CDS | 2.0 | 95.0  | 0.1  | T | COG0642 COG5002 COG2202 COG0784 COG2203 COG3322                                         | Signal transduction histidine kinase Signal transduction histidine kinase FOG: PAS/PAC domain FOG: CheY-like receiver FOG: GAF domain Predicted periplasmic ligand-binding sensor domain                                                                                                                                                                                                                                                                                           |
| TS29Rum20147 CDS CDS | 1.5 | 72.5  | 0.1  | T | COG0642 COG5002 COG4251 COG2205 COG3447                                                 | Signal transduction histidine kinase Signal transduction histidine kinase Bacteriophytochrome (light-regulated signal transduction histidine kinase) Osmosensitive K+ channel histidine kinase Predicted integral membrane sensor domain                                                                                                                                                                                                                                           |
| Bpse1848 CDS CDS     | 0.5 | 24.5  | 0.1  | T | COG2972                                                                                 | Predicted signal transduction protein with a C-terminal ATPase domain                                                                                                                                                                                                                                                                                                                                                                                                              |
| TS29Bac01917 CDS CDS | 1.0 | 52.0  | 0.1  | T | COG0642 COG4191                                                                         | Signal transduction histidine kinase Signal transduction histidine kinase regulating C4-dicarboxylate transport system                                                                                                                                                                                                                                                                                                                                                             |
| TS28Fae12844 CDS CDS | 0.3 | 17.5  | 0.1  | T | COG0642 COG5002 COG2202 COG4251 COG2205 COG3447                                         | Signal transduction histidine kinase Signal transduction histidine kinase FOG: PAS/PAC domain Bacteriophytochrome (light-regulated signal transduction histidine kinase) Osmosensitive K+ channel histidine kinase Predicted integral membrane sensor domain                                                                                                                                                                                                                       |
| TS29Rum11420 CDS CDS | 1.0 | 53.0  | 0.1  | T | COG0642 COG5002 COG0784 COG5001                                                         | Signal transduction histidine kinase Signal transduction histidine kinase FOG: CheY-like receiver Predicted signal transduction protein containing a membrane domain, an EAL and a GGDEF domain                                                                                                                                                                                                                                                                                    |
| Ehal1053 CDS CDS     | 0.4 | 19.8  | 0.1  | T | COG0642 COG2202 COG5002 COG2203 COG2205                                                 | Signal transduction histidine kinase FOG: PAS/PAC domain Signal transduction histidine kinase FOG: GAF domain Osmosensitive K+ channel histidine kinase                                                                                                                                                                                                                                                                                                                            |
| TS29Rum00173 CDS CDS | 1.0 | 57.0  | 0.1  | T | COG2972                                                                                 | Predicted signal transduction protein with a C-terminal ATPase domain                                                                                                                                                                                                                                                                                                                                                                                                              |
| TS29Rum20465 CDS CDS | 1.3 | 77.5  | 0.1  | T | COG0642 COG5002 COG2202 COG2205                                                         | Signal transduction histidine kinase Signal transduction histidine kinase FOG: PAS/PAC domain Osmosensitive K+ channel histidine kinase                                                                                                                                                                                                                                                                                                                                            |
| TS29Bac11581 CDS CDS | 0.3 | 19.5  | 0.1  | T | COG2204                                                                                 | Response regulator containing CheY-like receiver, AAA-type ATPase, and DNA-binding domains                                                                                                                                                                                                                                                                                                                                                                                         |
| Fpram2122506 CDS CDS | 1.3 | 74.3  | 0.1  | T | COG0642 COG2202 COG5002 COG2205 COG4250                                                 | Signal transduction histidine kinase FOG: PAS/PAC domain Signal transduction histidine kinase Osmosensitive K+ channel histidine kinase Predicted sensor protein/domain                                                                                                                                                                                                                                                                                                            |
| TS29Fae04768 CDS CDS | 1.0 | 59.0  | 0.1  | T | COG0642 COG5002 COG2202                                                                 | Signal transduction histidine kinase Signal transduction histidine kinase FOG: PAS/PAC domain                                                                                                                                                                                                                                                                                                                                                                                      |
| Dfor2928 CDS CDS     | 0.5 | 30.8  | 0.1  | T | COG0642 COG2198 COG2202 COG0784 COG2203 COG5278 COG3300 COG3322 COG5001 COG3452 COG3614 | Signal transduction histidine kinase FOG: HPT domain FOG: PAS/PAC domain FOG: CheY-like receiver FOG: GAF domain Predicted periplasmic ligand-binding sensor domain MHYT domain (predicted integral membrane sensor domain) Predicted periplasmic ligand-binding sensor domain Predicted signal transduction protein containing a membrane domain, an EAL and a GGDEF domain Predicted periplasmic ligand-binding sensor domain Predicted periplasmic ligand-binding sensor domain |
| TS29Rum11911 CDS CDS | 1.0 | 63.0  | 0.1  | T | COG2972                                                                                 | Predicted signal transduction protein with a C-terminal ATPase domain                                                                                                                                                                                                                                                                                                                                                                                                              |
| TS29Fae09332 CDS CDS | 0.3 | 22.2  | 0.1  | T | COG2972                                                                                 | Predicted signal transduction protein with a C-terminal ATPase domain                                                                                                                                                                                                                                                                                                                                                                                                              |
| TS29Rum13807 CDS CDS | 1.0 | 68.0  | 0.1  | T | COG2972                                                                                 | Predicted signal transduction protein with a C-terminal ATPase domain                                                                                                                                                                                                                                                                                                                                                                                                              |
| TS29Rum20524 CDS CDS | 1.2 | 84.4  | 0.1  | T | COG0642 COG5002 COG2202 COG3292 COG2205 COG4250                                         | Signal transduction histidine kinase Signal transduction histidine kinase FOG: PAS/PAC domain Predicted periplasmic ligand-binding sensor domain Osmosensitive K+ channel histidine kinase Predicted sensor protein/domain                                                                                                                                                                                                                                                         |
| TS28Bif4500 CDS CDS  | 0.5 | 37.3  | 0.1  | T | COG1716                                                                                 | FOG: FHA domain                                                                                                                                                                                                                                                                                                                                                                                                                                                                    |
| TS29Bif0531 CDS CDS  | 0.5 | 37.3  | 0.1  | T | COG1716                                                                                 | FOG: FHA domain                                                                                                                                                                                                                                                                                                                                                                                                                                                                    |
| TS28Bif4614 CDS CDS  | 0.3 | 18.8  | 0.1  | T | COG0642 COG5002 COG2770                                                                 | Signal transduction histidine kinase Signal transduction histidine kinase FOG: HAMP domain                                                                                                                                                                                                                                                                                                                                                                                         |
| TS29Bif0029 CDS CDS  | 0.5 | 39.5  | 0.1  | T | COG2972                                                                                 | Predicted signal transduction protein with a C-terminal ATPase domain                                                                                                                                                                                                                                                                                                                                                                                                              |
| TS29Fae05518 CDS CDS | 1.0 | 90.0  | 0.1  | T | COG2972                                                                                 | Predicted signal transduction protein with a C-terminal ATPase domain                                                                                                                                                                                                                                                                                                                                                                                                              |
| TS29Rum19569 CDS CDS | 0.2 | 19.0  | 0.0  | T | COG2337                                                                                 | Growth inhibitor                                                                                                                                                                                                                                                                                                                                                                                                                                                                   |
| TS29Fae07232 CDS CDS | 1.0 | 96.0  | 0.0  | T | COG2972                                                                                 | Predicted signal transduction protein with a C-terminal ATPase domain                                                                                                                                                                                                                                                                                                                                                                                                              |
| TS29Fae03339 CDS CDS | 1.0 | 99.0  | 0.0  | T | COG2972 COG3290                                                                         | Predicted signal transduction protein with a C-terminal ATPase domain Signal transduction histidine kinase regulating citrate/malate metabolism                                                                                                                                                                                                                                                                                                                                    |
| TS29Bac01323 CDS CDS | 0.3 | 33.0  | 0.0  | T | COG0642 COG5002 COG2202 COG2770 COG2203 COG2205                                         | Signal transduction histidine kinase Signal transduction histidine kinase FOG: PAS/PAC domain FOG: HAMP domain FOG: GAF domain Osmosensitive K+ channel histidine kinase                                                                                                                                                                                                                                                                                                           |
| TS28Bif4630 CDS CDS  | 0.5 | 52.0  | 0.0  | T | COG5278 COG4251 COG3920                                                                 | Predicted periplasmic ligand-binding sensor domain Bacteriophytochrome (light-regulated signal transduction histidine kinase) Signal transduction histidine kinase                                                                                                                                                                                                                                                                                                                 |
| TS29Fae07303 CDS CDS | 1.0 | 109.0 | 0.0  | T | COG2972 COG3290                                                                         | Predicted signal transduction protein with a C-terminal ATPase domain Signal transduction histidine kinase regulating citrate/malate metabolism                                                                                                                                                                                                                                                                                                                                    |
| TS29Bif3213 CDS CDS  | 0.3 | 27.3  | 0.0  | T | COG0642 COG5002 COG2770                                                                 | Signal transduction histidine kinase Signal transduction histidine kinase FOG: HAMP domain                                                                                                                                                                                                                                                                                                                                                                                         |

|                      |      |       |      |         |                                                                                                                                 |                                                                                                                                                                                                                                                                                                                                                                                                                                                                                                                                                                                                                                                                                                                                                                                                                                                                                                                                                                                         |
|----------------------|------|-------|------|---------|---------------------------------------------------------------------------------------------------------------------------------|-----------------------------------------------------------------------------------------------------------------------------------------------------------------------------------------------------------------------------------------------------------------------------------------------------------------------------------------------------------------------------------------------------------------------------------------------------------------------------------------------------------------------------------------------------------------------------------------------------------------------------------------------------------------------------------------------------------------------------------------------------------------------------------------------------------------------------------------------------------------------------------------------------------------------------------------------------------------------------------------|
| TS29Bif1702 CDS CDS  | 0.5  | 55.0  | 0.0  | T       | COG4564 COG3850 COG4585 COG3851                                                                                                 | Signal transduction histidine kinase Signal transduction histidine kinase, nitrate/nitrite-specific Signal transduction histidine kinase Signal transduction histidine kinase, glucose-6-phosphate specific                                                                                                                                                                                                                                                                                                                                                                                                                                                                                                                                                                                                                                                                                                                                                                             |
| TS29Col1611 CDS CDS  | 0.5  | 58.5  | 0.0  | T       | COG0642 COG5002 COG2202                                                                                                         | Signal transduction histidine kinase Signal transduction histidine kinase FOG: PAS/PAC domain                                                                                                                                                                                                                                                                                                                                                                                                                                                                                                                                                                                                                                                                                                                                                                                                                                                                                           |
| TS29Bif3028 CDS CDS  | 1.5  | 203.5 | 0.0  | T       | COG4564 COG3850 COG4585 COG3851                                                                                                 | Signal transduction histidine kinase Signal transduction histidine kinase, nitrate/nitrite-specific Signal transduction histidine kinase Signal transduction histidine kinase, glucose-6-phosphate specific                                                                                                                                                                                                                                                                                                                                                                                                                                                                                                                                                                                                                                                                                                                                                                             |
| FpraM2122299 CDS CDS | 0.3  | 45.5  | 0.0  | T       | COG0642 COG2202 COG5002 COG4251 COG2205                                                                                         | Signal transduction histidine kinase Bacteriophytochrome (light-regulated signal transduction histidine kinase) Osmosensitive K+ channel histidine kinase                                                                                                                                                                                                                                                                                                                                                                                                                                                                                                                                                                                                                                                                                                                                                                                                                               |
| FpraM2121357 CDS CDS | 0.5  | 68.5  | 0.0  | T       | COG2972                                                                                                                         | Predicted signal transduction protein with a C-terminal ATPase domain                                                                                                                                                                                                                                                                                                                                                                                                                                                                                                                                                                                                                                                                                                                                                                                                                                                                                                                   |
| TS29Bif3224 CDS CDS  | 0.5  | 89.0  | 0.0  | T       | COG5278 COG4251 COG3920                                                                                                         | Predicted periplasmic ligand-binding sensor domain Bacteriophytochrome (light-regulated signal transduction histidine kinase)                                                                                                                                                                                                                                                                                                                                                                                                                                                                                                                                                                                                                                                                                                                                                                                                                                                           |
| Ccom0780 CDS CDS     | 0.2  | 34.7  | 0.0  | T       | COG0642 COG2202 COG5002 COG2203 COG3322 COG2205 COG4250                                                                         | Signal transduction histidine kinase FOG: PAS/PAC domain Signal transduction histidine kinase FOG: GAF domain Predicted periplasmic ligand-binding sensor domain Osmosensitive K+ channel histidine kinase Predicted sensor protein/domain                                                                                                                                                                                                                                                                                                                                                                                                                                                                                                                                                                                                                                                                                                                                              |
| TS29Bif2997 CDS CDS  | 0.3  | 58.3  | 0.0  | T       | COG1966                                                                                                                         | Carbon starvation protein, predicted membrane protein                                                                                                                                                                                                                                                                                                                                                                                                                                                                                                                                                                                                                                                                                                                                                                                                                                                                                                                                   |
| TS29Col1577 CDS CDS  | 0.3  | 79.0  | 0.0  | T       | COG1217                                                                                                                         | Predicted membrane GTPase involved in stress response                                                                                                                                                                                                                                                                                                                                                                                                                                                                                                                                                                                                                                                                                                                                                                                                                                                                                                                                   |
| TS28Bif0284 CDS CDS  | 0.3  | 85.3  | 0.0  | T       | COG1966                                                                                                                         | Carbon starvation protein, predicted membrane protein                                                                                                                                                                                                                                                                                                                                                                                                                                                                                                                                                                                                                                                                                                                                                                                                                                                                                                                                   |
| Msmi751535 CDS CDS   | 0.8  | 0.3   | 13.6 | TIC     | COG5635 COG1413                                                                                                                 | Predicted NTPase (NACHT family) FOG: HEAT repeat                                                                                                                                                                                                                                                                                                                                                                                                                                                                                                                                                                                                                                                                                                                                                                                                                                                                                                                                        |
| Dlon0584 CDS CDS     | 1.5  | 0.5   | 13.6 | T E     | COG0589 COG0531                                                                                                                 | Universal stress protein UspA and related nucleotide-binding proteins Amino acid transporters                                                                                                                                                                                                                                                                                                                                                                                                                                                                                                                                                                                                                                                                                                                                                                                                                                                                                           |
| Buni0990 CDS CDS     | 1.5  | 0.5   | 13.6 | T E     | COG0642 COG2202 COG0784 COG5002 COG0834 COG2203 COG5278 COG3300 COG2770 COG3614                                                 | Signal transduction histidine kinase FOG: PAS/PAC domain FOG: CheY-like receiver Signal transduction histidine kinase ABC-type amino acid transport/signal transduction systems, periplasmic component/domain FOG: GAF domain Predicted periplasmic ligand-binding sensor domain MHYT domain (predicted integral membrane sensor domain) FOG: HAMP domain Predicted periplasmic ligand-binding sensor domain                                                                                                                                                                                                                                                                                                                                                                                                                                                                                                                                                                            |
| Aput0287 CDS CDS     | 6.0  | 2.0   | 13.6 | T E     | COG0560 COG3830                                                                                                                 | Phosphoserine phosphatase ACT domain-containing protein                                                                                                                                                                                                                                                                                                                                                                                                                                                                                                                                                                                                                                                                                                                                                                                                                                                                                                                                 |
| Robe2500 CDS CDS     | 1.5  | 0.5   | 13.6 | T E     | COG0642 COG2202 COG3447 COG0784 COG5002 COG0834 COG3322 COG3706 COG4251 COG2205                                                 | Signal transduction histidine kinase FOG: PAS/PAC domain Predicted integral membrane sensor domain FOG: CheY-like receiver Signal transduction histidine kinase ABC-type amino acid transport/signal transduction systems, periplasmic component/domain Predicted periplasmic ligand-binding sensor domain Response regulator containing a CheY-like receiver domain and a GGDEF domain Bacteriophytochrome (light-regulated signal transduction histidine kinase) Osmosensitive K+ channel histidine kinase                                                                                                                                                                                                                                                                                                                                                                                                                                                                            |
| Csym0488 CDS CDS     | 5.5  | 1.0   | 25.0 | T E K   | COG0642 COG2198 COG2202 COG0784 COG0834 COG2203 COG3437 COG5278 COG3300 COG4252 COG3452 COG3614                                 | Signal transduction histidine kinase FOG: HPT domain FOG: PAS/PAC domain FOG: CheY-like receiver ABC-type amino acid transport/signal transduction systems, periplasmic component/domain FOG: GAF domain Response regulator containing a CheY-like receiver domain and an HD-GYP domain Predicted periplasmic ligand-binding sensor domain MHYT domain (predicted integral membrane sensor domain) Predicted transmembrane sensor domain Predicted periplasmic ligand-binding sensor domain Predicted periplasmic ligand-binding sensor domain                                                                                                                                                                                                                                                                                                                                                                                                                                          |
| Ehal0754 CDS CDS     | 0.5  | 23.8  | 0.1  | T E K   | COG0642 COG2198 COG2202 COG0834 COG2203 COG3437 COG3300 COG3452                                                                 | Signal transduction histidine kinase FOG: HPT domain FOG: PAS/PAC domain ABC-type amino acid transport/signal transduction systems, periplasmic component/domain FOG: GAF domain Response regulator containing a CheY-like receiver domain and an HD-GYP domain MHYT domain (predicted integral membrane sensor domain) Predicted periplasmic ligand-binding sensor domain                                                                                                                                                                                                                                                                                                                                                                                                                                                                                                                                                                                                              |
| BactD14130 CDS CDS   | 9.2  | 1.3   | 31.2 | T E K G | COG0642 COG2202 COG0784 COG5002 COG3292 COG0834 COG4753 COG3706 COG0745 COG2972 COG1879 COG2114 COG4251 COG2770 COG2172         | Signal transduction histidine kinase FOG: PAS/PAC domain FOG: CheY-like receiver Signal transduction histidine kinase Predicted periplasmic ligand-binding sensor domain ABC-type amino acid transport/signal transduction systems, periplasmic component/domain Response regulator containing CheY-like receiver domain and AraC-type DNA-binding domain Response regulator containing a CheY-like receiver domain and a GGDEF domain Response regulators consisting of a CheY-like receiver domain and a winged-helix DNA-binding domain Predicted signal transduction protein with a C-terminal ATPase domain ABC-type sugar transport system, periplasmic component Adenylate cyclase, family 3 (some proteins contain HAMP domain) Bacteriophytochrome (light-regulated signal transduction histidine kinase) FOG: HAMP domain Anti-sigma regulatory factor (Ser/Thr protein kinase)                                                                                               |
| Bova2060 CDS CDS     | 10.7 | 3.5   | 13.8 | T E K G | COG0642 COG2202 COG0784 COG5002 COG3292 COG0834 COG4753 COG3706 COG5001 COG0745 COG2972 COG1879 COG2114 COG4251 COG2770 COG2172 | Signal transduction histidine kinase FOG: PAS/PAC domain FOG: CheY-like receiver Signal transduction histidine kinase Predicted periplasmic ligand-binding sensor domain ABC-type amino acid transport/signal transduction systems, periplasmic component/domain Response regulator containing CheY-like receiver domain and AraC-type DNA-binding domain Response regulator containing a CheY-like receiver domain and a GGDEF domain Predicted signal transduction protein containing a membrane domain, an EAL and a GGDEF domain Response regulators consisting of a CheY-like receiver domain and a winged-helix DNA-binding domain Predicted signal transduction protein with a C-terminal ATPase domain ABC-type sugar transport system, periplasmic component Adenylate cyclase, family 3 (some proteins contain HAMP domain) Bacteriophytochrome (light-regulated signal transduction histidine kinase) FOG: HAMP domain Anti-sigma regulatory factor (Ser/Thr protein kinase) |
| Buni3603 CDS CDS     | 1.5  | 0.5   | 13.6 | T E M   | COG0834 COG4623                                                                                                                 | ABC-type amino acid transport/signal transduction systems, periplasmic component/domain Predicted soluble lytic transglycosylase fused to an ABC-type amino acid-binding protein                                                                                                                                                                                                                                                                                                                                                                                                                                                                                                                                                                                                                                                                                                                                                                                                        |
| Caer0098 CDS CDS     | 5.0  | 0.5   | 45.4 | T G     | COG1762 COG1445 COG3925                                                                                                         | Phosphotransferase system mannitol/fructose-specific IIA domain (Ntr-type) Phosphotransferase system fructose-specific component IIB N-terminal domain of the phosphotransferase system fructose-specific component IIB                                                                                                                                                                                                                                                                                                                                                                                                                                                                                                                                                                                                                                                                                                                                                                 |
| Cbo14935 CDS CDS     | 8.0  | 1.0   | 36.3 | T G     | COG2202 COG1879 COG1172 COG4158 COG4211 COG4214                                                                                 | FOG: PAS/PAC domain ABC-type sugar transport system, periplasmic component Ribose/xylose/arabinose/galactoside ABC-type transport systems, permease components Predicted ABC-type sugar transport system, permease component ABC-type glucose/galactose transport system, permease component ABC-type xylose transport system, permease component                                                                                                                                                                                                                                                                                                                                                                                                                                                                                                                                                                                                                                       |

|                      |      |      |      |     |                                                                 |                                                                                                                                                                                                                                                                                                                                                                                                                                                                                                                                  |
|----------------------|------|------|------|-----|-----------------------------------------------------------------|----------------------------------------------------------------------------------------------------------------------------------------------------------------------------------------------------------------------------------------------------------------------------------------------------------------------------------------------------------------------------------------------------------------------------------------------------------------------------------------------------------------------------------|
| Rtor1814 CDS CDS     | 5.3  | 0.7  | 36.3 | T G | COG1080 COG4668 COG3412 COG2190 COG3605 COG1762 COG1925         | Phosphoenolpyruvate-protein kinase (PTS system EI component in bacteria) Mannitol/fructose-specific phosphotransferase system, IIA domain Uncharacterized protein conserved in bacteria Phosphotransferase system IIA components Signal transduction protein containing GAF and PtsI domains Phosphotransferase system mannitol/fructose-specific IIA domain (Ntr-type) Phosphotransferase system, HPr-related proteins                                                                                                          |
| Cbol4938 CDS CDS     | 14.0 | 3.0  | 21.2 | T G | COG5002 COG1879                                                 | Signal transduction histidine kinase ABC-type sugar transport system, periplasmic component                                                                                                                                                                                                                                                                                                                                                                                                                                      |
| Robe1265 CDS CDS     | 20.5 | 5.0  | 18.6 | T G | COG5002 COG1879                                                 | Signal transduction histidine kinase ABC-type sugar transport system, periplasmic component                                                                                                                                                                                                                                                                                                                                                                                                                                      |
| Ccom0083 CDS CDS     | 4.0  | 1.0  | 18.2 | T G | COG1080 COG4668 COG3412 COG3605                                 | Phosphoenolpyruvate-protein kinase (PTS system EI component in bacteria) Mannitol/fructose-specific phosphotransferase system, IIA domain Uncharacterized protein conserved in bacteria Signal transduction protein containing GAF and PtsI domains                                                                                                                                                                                                                                                                              |
| Csym3615 CDS CDS     | 3.0  | 1.0  | 13.6 | T G | COG5002 COG1879                                                 | Signal transduction histidine kinase ABC-type sugar transport system, periplasmic component                                                                                                                                                                                                                                                                                                                                                                                                                                      |
| Rtor1612 CDS CDS     | 6.0  | 0.5  | 54.5 | T K | COG0745                                                         | Response regulators consisting of a CheY-like receiver domain and a winged-helix DNA-binding domain                                                                                                                                                                                                                                                                                                                                                                                                                              |
| Buni1321 CDS CDS     | 3.0  | 0.5  | 27.2 | T K | COG3708 COG0789 COG4978                                         | Uncharacterized protein conserved in bacteria Predicted transcriptional regulators Transcriptional regulator, effector-binding domain/component                                                                                                                                                                                                                                                                                                                                                                                  |
| Cbol6625 CDS CDS     | 5.0  | 1.0  | 22.7 | T K | COG5002 COG2972 COG3275 COG5012 COG4936                         | Signal transduction histidine kinase Predicted signal transduction protein with a C-terminal ATPase domain Putative regulator of cell autolysis Predicted cobalamin binding protein Predicted sensor domain                                                                                                                                                                                                                                                                                                                      |
| Casp2521 CDS CDS     | 5.0  | 1.0  | 22.7 | T K | COG2972 COG3275 COG5012 COG4936                                 | Predicted signal transduction protein with a C-terminal ATPase domain Putative regulator of cell autolysis Predicted cobalamin binding protein Predicted sensor domain                                                                                                                                                                                                                                                                                                                                                           |
| Cbol5796 CDS CDS     | 4.0  | 1.0  | 18.2 | T K | COG0745                                                         | Response regulators consisting of a CheY-like receiver domain and a winged-helix DNA-binding domain                                                                                                                                                                                                                                                                                                                                                                                                                              |
| BactD14035 CDS CDS   | 1.3  | 0.3  | 18.2 | T K | COG4753 COG2207                                                 | Response regulator containing CheY-like receiver domain and AraC-type DNA-binding domain AraC-type DNA-binding domain-containing proteins                                                                                                                                                                                                                                                                                                                                                                                        |
| ShigspD92392 CDS CDS | 3.5  | 1.0  | 15.9 | T K | COG2202 COG5001 COG2200 COG3614 COG2771 COG4943                 | FOG: PAS/PAC domain Predicted signal transduction protein containing a membrane domain, an EAL and a GGDEF domain FOG: EAL domain Predicted periplasmic ligand-binding sensor domain DNA-binding HTH domain-containing proteins Predicted signal transduction protein containing sensor and EAL domains                                                                                                                                                                                                                          |
| BactD24148 CDS CDS   | 3.3  | 1.0  | 15.1 | T K | COG2204 COG1221 COG3604 COG3829                                 | Response regulator containing CheY-like receiver, AAA-type ATPase, and DNA-binding domains Transcriptional regulators containing an AAA-type ATPase domain and a DNA-binding domain Transcriptional regulator containing GAF, AAA-type ATPase, and DNA binding domains Transcriptional regulator containing PAS, AAA-type ATPase, and DNA-binding domains                                                                                                                                                                        |
| BactD11673 CDS CDS   | 1.0  | 0.3  | 13.6 | T K | COG0317                                                         | Guanosine polyphosphate pyrophosphohydrolases/synthetases                                                                                                                                                                                                                                                                                                                                                                                                                                                                        |
| BactD23419 CDS CDS   | 1.5  | 0.5  | 13.6 | T K | COG2972 COG3275 COG4936                                         | Predicted signal transduction protein with a C-terminal ATPase domain Putative regulator of cell autolysis Predicted sensor domain                                                                                                                                                                                                                                                                                                                                                                                               |
| Rtor0116 CDS CDS     | 3.0  | 1.0  | 13.6 | T K | COG0745                                                         | Response regulators consisting of a CheY-like receiver domain and a winged-helix DNA-binding domain                                                                                                                                                                                                                                                                                                                                                                                                                              |
| Bova2994 CDS CDS     | 1.5  | 0.5  | 13.6 | T K | COG2972 COG3275 COG4936                                         | Predicted signal transduction protein with a C-terminal ATPase domain Putative regulator of cell autolysis Predicted sensor domain                                                                                                                                                                                                                                                                                                                                                                                               |
| Rtor0202 CDS CDS     | 17.3 | 6.0  | 13.1 | T K | COG4753 COG2207                                                 | Response regulator containing CheY-like receiver domain and AraC-type DNA-binding domain AraC-type DNA-binding domain-containing proteins                                                                                                                                                                                                                                                                                                                                                                                        |
| Buni2583 CDS CDS     | 8.6  | 3.0  | 13.0 | T K | COG0745                                                         | Response regulators consisting of a CheY-like receiver domain and a winged-helix DNA-binding domain                                                                                                                                                                                                                                                                                                                                                                                                                              |
| Aput1211 CDS CDS     | 8.0  | 3.0  | 12.1 | T K | COG2198 COG0784 COG3437 COG2204 COG4753 COG3706 COG0745 COG3920 | FOG: HPT domain FOG: CheY-like receiver Response regulator containing a CheY-like receiver domain and an HD-GYP domain Response regulator containing CheY-like receiver, AAA-type ATPase, and DNA-binding domains Response regulator containing CheY-like receiver domain and AraC-type DNA-binding domain Response regulator containing a CheY-like receiver domain and a GGDEF domain Response regulators consisting of a CheY-like receiver domain and a winged-helix DNA-binding domain Signal transduction histidine kinase |
| Buni2582 CDS CDS     | 36.6 | 14.0 | 11.9 | T K | COG0642 COG2202 COG0784 COG5002 COG2203 COG3437 COG2770 COG2205 | Signal transduction histidine kinase FOG: PAS/PAC domain FOG: CheY-like receiver Signal transduction histidine kinase FOG: GAF domain Response regulator containing a CheY-like receiver domain and an HD-GYP domain FOG: HAMP domain Osmosensitive K <sup>+</sup> channel histidine kinase                                                                                                                                                                                                                                      |
| BactD11047 CDS CDS   | 5.8  | 2.5  | 10.4 | T K | COG4753 COG2207                                                 | Response regulator containing CheY-like receiver domain and AraC-type DNA-binding domain AraC-type DNA-binding domain-containing proteins                                                                                                                                                                                                                                                                                                                                                                                        |
| Bxyl1337 CDS CDS     | 5.8  | 2.5  | 10.4 | T K | COG4753 COG2207                                                 | Response regulator containing CheY-like receiver domain and AraC-type DNA-binding domain AraC-type DNA-binding domain-containing proteins                                                                                                                                                                                                                                                                                                                                                                                        |
| Dlon2015 CDS CDS     | 0.9  | 45.5 | 0.1  | T K | COG0317 COG2357                                                 | Guanosine polyphosphate pyrophosphohydrolases/synthetases Uncharacterized protein conserved in bacteria                                                                                                                                                                                                                                                                                                                                                                                                                          |
| Ccom0781 CDS CDS     | 0.3  | 21.5 | 0.1  | T K | COG0745                                                         | Response regulators consisting of a CheY-like receiver domain and a winged-helix DNA-binding domain                                                                                                                                                                                                                                                                                                                                                                                                                              |
| CspM6210567 CDS CDS  | 0.9  | 64.2 | 0.1  | T K | COG0317 COG2357                                                 | Guanosine polyphosphate pyrophosphohydrolases/synthetases Uncharacterized protein conserved in bacteria                                                                                                                                                                                                                                                                                                                                                                                                                          |
| Ehal1052 CDS CDS     | 0.3  | 27.1 | 0.1  | T K | COG0745                                                         | Response regulators consisting of a CheY-like receiver domain and a winged-helix DNA-binding domain                                                                                                                                                                                                                                                                                                                                                                                                                              |
| Bryfor3294 CDS CDS   | 0.2  | 36.9 | 0.0  | T K | COG0745                                                         | Response regulators consisting of a CheY-like receiver domain and a winged-helix DNA-binding domain                                                                                                                                                                                                                                                                                                                                                                                                                              |
| Rumhyd1507 CDS CDS   | 0.2  | 65.4 | 0.0  | T K | COG0745                                                         | Response regulators consisting of a CheY-like receiver domain and a winged-helix DNA-binding domain                                                                                                                                                                                                                                                                                                                                                                                                                              |
| Even0023 CDS CDS     | 0.2  | 68.8 | 0.0  | T K | COG0745                                                         | Response regulators consisting of a CheY-like receiver domain and a winged-helix DNA-binding domain                                                                                                                                                                                                                                                                                                                                                                                                                              |

|                      |      |      |       |         |                                                                                                                                         |                                                                                                                                                                                                                                                                                                                                                                                                                                                                                                                                                                                                                                                                                                                                                                                                                                                                                                                                               |
|----------------------|------|------|-------|---------|-----------------------------------------------------------------------------------------------------------------------------------------|-----------------------------------------------------------------------------------------------------------------------------------------------------------------------------------------------------------------------------------------------------------------------------------------------------------------------------------------------------------------------------------------------------------------------------------------------------------------------------------------------------------------------------------------------------------------------------------------------------------------------------------------------------------------------------------------------------------------------------------------------------------------------------------------------------------------------------------------------------------------------------------------------------------------------------------------------|
| Bxy13038 CDS CDS     | 1.0  | 46.8 | 0.1   | T K G   | COG0642 COG2198 COG2202 COG0784 COG5002 COG3292 COG4753 COG3706 COG5001 COG0745 COG2972 COG1879 COG2114 COG4251                         | Signal transduction histidine kinase FOG: Hpt domain FOG: PAS/PAC domain FOG: CheY-like receiver Signal transduction histidine kinase Predicted periplasmic ligand-binding sensor domain Response regulator containing CheY-like receiver domain and AraC-type DNA-binding domain Response regulator containing a CheY-like receiver domain and a GGDEF domain Predicted signal transduction protein containing a membrane domain, an EAL and a GGDEF domain Response regulators consisting of a CheY-like receiver domain and a winged-helix DNA-binding domain Predicted signal transduction protein with a C-terminal ATPase domain ABC-type sugar transport system, periplasmic component Adenylate cyclase, family 3 (some proteins contain HAMP domain) Bacteriophytochrome (light-regulated signal transduction histidine kinase)                                                                                                      |
| RintL12266 CDS CDS   | 19.0 | 5.0  | 17.3  | T K L   | COG0515                                                                                                                                 | Serine/threonine protein kinase                                                                                                                                                                                                                                                                                                                                                                                                                                                                                                                                                                                                                                                                                                                                                                                                                                                                                                               |
| Dlon0840 CDS CDS     | 0.3  | 14.8 | 0.1   | T K L G | COG4753 COG2207 COG3449 COG3664                                                                                                         | Response regulator containing CheY-like receiver domain and AraC-type DNA-binding domain AraC-type DNA-binding domain-containing proteins DNA gyrase inhibitor Beta-xylosidase                                                                                                                                                                                                                                                                                                                                                                                                                                                                                                                                                                                                                                                                                                                                                                |
| Buni1598 CDS CDS     | 11.5 | 3.5  | 14.9  | T K L O | COG0457 COG0515 COG4995 COG4249 COG5549 COG1912 COG3914 COG4248                                                                         | FOG: TPR repeat Serine/threonine protein kinase Uncharacterized protein conserved in bacteria Uncharacterized protein containing caspase domain Predicted Zn-dependent protease Uncharacterized conserved protein Predicted O-linked N-acetylglucosamine transferase, SPINDLY family Uncharacterized protein with protein kinase and helix-hairpin-helix DNA-binding domains                                                                                                                                                                                                                                                                                                                                                                                                                                                                                                                                                                  |
| Casp2508 CDS CDS     | 3.3  | 1.0  | 15.1  | T K O   | COG2508 COG3835                                                                                                                         | Regulator of polyketide synthase expression Sugar diacid utilization regulator Intein/homing endonuclease Phosphoenolpyruvate synthase/pyruvate phosphate dikinase Phosphoenolpyruvate-protein kinase (PTS system EI component in bacteria) Mannitol/fructose-specific phosphotransferase system, IIA domain Uncharacterized protein conserved in bacteria Phosphotransferase system IIA components Signal transduction protein containing GAF and PtsI domains                                                                                                                                                                                                                                                                                                                                                                                                                                                                               |
| Rumhyd2532 CDS CDS   | 13.7 | 2.0  | 31.0  | T L G   | COG1372 COG0574 COG1080 COG4668 COG3412 COG2190 COG3605                                                                                 | FOG: LysM repeat Putative peptidoglycan-binding domain-containing protein SH3 domain protein Cell wall-associated hydrolases (invasion-associated proteins) Uncharacterized protein conserved in bacteria Rhs family protein                                                                                                                                                                                                                                                                                                                                                                                                                                                                                                                                                                                                                                                                                                                  |
| Rumhyd0677 CDS CDS   | 3.0  | 1.0  | 13.6  | T M     | COG1388 COG3409 COG3103 COG0791 COG3883 COG3209                                                                                         | FOG: LysM repeat Putative peptidoglycan-binding domain-containing protein SH3 domain protein Cell wall-associated hydrolases (invasion-associated proteins) Uncharacterized protein conserved in bacteria Rhs family protein                                                                                                                                                                                                                                                                                                                                                                                                                                                                                                                                                                                                                                                                                                                  |
| Ccom1842 CDS CDS     | 3.0  | 1.0  | 13.6  | T M     | COG1388 COG3409 COG3103 COG0791 COG3883 COG3209 COG3584                                                                                 | FOG: LysM repeat Putative peptidoglycan-binding domain-containing protein SH3 domain protein Cell wall-associated hydrolases (invasion-associated proteins) Uncharacterized protein conserved in bacteria Rhs family protein Uncharacterized protein conserved in bacteria                                                                                                                                                                                                                                                                                                                                                                                                                                                                                                                                                                                                                                                                    |
| Rgna1535 CDS CDS     | 8.0  | 3.0  | 12.1  | T M     | COG3409 COG3103 COG0860 COG2247 COG2861                                                                                                 | Putative peptidoglycan-binding domain-containing protein SH3 domain protein N-acetylmuramoyl-L-alanine amidase Putative cell wall-binding domain Uncharacterized protein conserved in bacteria                                                                                                                                                                                                                                                                                                                                                                                                                                                                                                                                                                                                                                                                                                                                                |
| FpraM2121016 CDS CDS | 3.7  | 1.5  | 11.1  | T M     | COG3103 COG0791 COG3883 COG0739                                                                                                         | SH3 domain protein Cell wall-associated hydrolases (invasion-associated proteins) Uncharacterized protein conserved in bacteria Membrane proteins related to metalloendopeptidases                                                                                                                                                                                                                                                                                                                                                                                                                                                                                                                                                                                                                                                                                                                                                            |
| ShigspD92591 CDS CDS | 4.0  | 1.0  | 18.2  | T N     | COG2202 COG0840                                                                                                                         | FOG: PAS/PAC domain Methyl-accepting chemotaxis protein                                                                                                                                                                                                                                                                                                                                                                                                                                                                                                                                                                                                                                                                                                                                                                                                                                                                                       |
| RintL13689 CDS CDS   | 3.0  | 1.0  | 13.6  | T N     | COG2202 COG5278 COG0840                                                                                                                 | FOG: PAS/PAC domain Predicted periplasmic ligand-binding sensor domain Methyl-accepting chemotaxis protein                                                                                                                                                                                                                                                                                                                                                                                                                                                                                                                                                                                                                                                                                                                                                                                                                                    |
| Bthe3732589 CDS CDS  | 0.4  | 24.7 | 0.1   | T N E   | COG0642 COG2198 COG2202 COG3447 COG1352 COG0784 COG5002 COG0834 COG5278 COG4252 COG2770                                                 | Signal transduction histidine kinase FOG: Hpt domain FOG: PAS/PAC domain Predicted integral membrane sensor domain Methylase of chemotaxis methyl-accepting proteins FOG: CheY-like receiver Signal transduction histidine kinase ABC-type amino acid transport/signal transduction systems, periplasmic component domain Predicted periplasmic ligand-binding sensor domain Predicted transmembrane sensor domain FOG: HAMP domain                                                                                                                                                                                                                                                                                                                                                                                                                                                                                                           |
| Bova3378 CDS CDS     | 0.3  | 14.7 | 0.1   | T N K G | COG0642 COG2202 COG0784 COG5002 COG3292 COG5278 COG3322 COG4753 COG3706 COG5001 COG2972 COG1879 COG2114 COG4251 COG2770 COG2207 COG2201 | Signal transduction histidine kinase FOG: PAS/PAC domain FOG: CheY-like receiver Signal transduction histidine kinase Predicted periplasmic ligand-binding sensor domain Predicted periplasmic ligand-binding sensor domain Response regulator containing CheY-like receiver domain and AraC-type DNA-binding domain Response regulator containing a CheY-like receiver domain and a GGDEF domain Predicted signal transduction protein containing a membrane domain, an EAL and a GGDEF domain Predicted signal transduction protein with a C-terminal ATPase domain ABC-type sugar transport system, periplasmic component Adenylate cyclase, family 3 (some proteins contain HAMP domain) Bacteriophytochrome (light-regulated signal transduction histidine kinase) FOG: HAMP domain AraC-type DNA-binding domain-containing proteins Chemotaxis response regulator containing a CheY-like receiver domain and a methyltransferase domain |
| Cbol4366 CDS CDS     | 3.0  | 1.0  | 13.6  | T O     | COG2508                                                                                                                                 | Regulator of polyketide synthase expression                                                                                                                                                                                                                                                                                                                                                                                                                                                                                                                                                                                                                                                                                                                                                                                                                                                                                                   |
| Buni1536 CDS CDS     | 12.3 | 0.5  | 112.0 | U       | COG0552                                                                                                                                 | Signal recognition particle GTPase                                                                                                                                                                                                                                                                                                                                                                                                                                                                                                                                                                                                                                                                                                                                                                                                                                                                                                            |
| TS29Bac09292 CDS CDS | 9.1  | 0.5  | 83.0  | U       | COG0811                                                                                                                                 | Biopolymer transport proteins                                                                                                                                                                                                                                                                                                                                                                                                                                                                                                                                                                                                                                                                                                                                                                                                                                                                                                                 |
| Bthe7335617 CDS CDS  | 8.5  | 0.7  | 57.6  | U       | COG0653                                                                                                                                 | Preprotein translocase subunit SecA (ATPase, RNA helicase)                                                                                                                                                                                                                                                                                                                                                                                                                                                                                                                                                                                                                                                                                                                                                                                                                                                                                    |
| Bxv12358 CDS CDS     | 3.8  | 0.3  | 52.2  | U       | COG0681                                                                                                                                 | Signal peptidase I                                                                                                                                                                                                                                                                                                                                                                                                                                                                                                                                                                                                                                                                                                                                                                                                                                                                                                                            |
| Svar0325 CDS CDS     | 8.0  | 1.0  | 36.3  | U       | COG0541                                                                                                                                 | Signal recognition particle GTPase                                                                                                                                                                                                                                                                                                                                                                                                                                                                                                                                                                                                                                                                                                                                                                                                                                                                                                            |
| BactD20441 CDS CDS   | 3.8  | 0.5  | 34.8  | U       | COG0706                                                                                                                                 | Preprotein translocase subunit YidC                                                                                                                                                                                                                                                                                                                                                                                                                                                                                                                                                                                                                                                                                                                                                                                                                                                                                                           |
| Aco13157 CDS CDS     | 7.0  | 1.0  | 31.8  | U       | COG3451                                                                                                                                 | Type IV secretory pathway, VirB4 components                                                                                                                                                                                                                                                                                                                                                                                                                                                                                                                                                                                                                                                                                                                                                                                                                                                                                                   |
| Bova0458 CDS CDS     | 3.2  | 0.5  | 29.4  | U       | COG0811                                                                                                                                 | Biopolymer transport proteins                                                                                                                                                                                                                                                                                                                                                                                                                                                                                                                                                                                                                                                                                                                                                                                                                                                                                                                 |
| TS28Rum11474 CDS CDS | 35.5 | 5.5  | 29.3  | U       | COG0201                                                                                                                                 | Preprotein translocase subunit SecY                                                                                                                                                                                                                                                                                                                                                                                                                                                                                                                                                                                                                                                                                                                                                                                                                                                                                                           |
| TS28Clo09614 CDS CDS | 2.5  | 0.5  | 22.7  | U       | COG0201                                                                                                                                 | Preprotein translocase subunit SecY                                                                                                                                                                                                                                                                                                                                                                                                                                                                                                                                                                                                                                                                                                                                                                                                                                                                                                           |
| Bste1743 CDS CDS     | 4.6  | 1.0  | 20.8  | U       | COG0342                                                                                                                                 | Preprotein translocase subunit SecD                                                                                                                                                                                                                                                                                                                                                                                                                                                                                                                                                                                                                                                                                                                                                                                                                                                                                                           |
| BactD24164 CDS CDS   | 8.3  | 2.0  | 18.8  | U       | COG0653                                                                                                                                 | Preprotein translocase subunit SecA (ATPase, RNA helicase)                                                                                                                                                                                                                                                                                                                                                                                                                                                                                                                                                                                                                                                                                                                                                                                                                                                                                    |
| Rlac1919 CDS CDS     | 4.0  | 1.0  | 18.2  | U       | COG0342 COG0341                                                                                                                         | Preprotein translocase subunit SecD Preprotein translocase subunit SecF                                                                                                                                                                                                                                                                                                                                                                                                                                                                                                                                                                                                                                                                                                                                                                                                                                                                       |
| ShigspD90951 CDS CDS | 4.0  | 1.0  | 18.2  | U       | COG0342                                                                                                                                 | Preprotein translocase subunit SecD                                                                                                                                                                                                                                                                                                                                                                                                                                                                                                                                                                                                                                                                                                                                                                                                                                                                                                           |
| Bxv11098 CDS CDS     | 5.3  | 1.3  | 18.1  | U       | COG0811                                                                                                                                 | Biopolymer transport proteins                                                                                                                                                                                                                                                                                                                                                                                                                                                                                                                                                                                                                                                                                                                                                                                                                                                                                                                 |
| TS29Met0454 CDS CDS  | 30.5 | 8.0  | 17.3  | U       | COG3210                                                                                                                                 | Large exoproteins involved in heme utilization or adhesion                                                                                                                                                                                                                                                                                                                                                                                                                                                                                                                                                                                                                                                                                                                                                                                                                                                                                    |
| Csci0116 CDS CDS     | 7.0  | 2.0  | 15.9  | U       | COG3505                                                                                                                                 | Type IV secretory pathway, VirD4 components                                                                                                                                                                                                                                                                                                                                                                                                                                                                                                                                                                                                                                                                                                                                                                                                                                                                                                   |
| TS28Rum12577 CDS CDS | 10.0 | 3.0  | 15.1  | U       | COG0653                                                                                                                                 | Preprotein translocase subunit SecA (ATPase, RNA helicase)                                                                                                                                                                                                                                                                                                                                                                                                                                                                                                                                                                                                                                                                                                                                                                                                                                                                                    |
| BactD12818 CDS CDS   | 17.5 | 5.5  | 14.4  | U       | COG0653                                                                                                                                 | Preprotein translocase subunit SecA (ATPase, RNA helicase)                                                                                                                                                                                                                                                                                                                                                                                                                                                                                                                                                                                                                                                                                                                                                                                                                                                                                    |
| TS29Bac09291 CDS CDS | 3.1  | 1.0  | 14.1  | U       | COG0811                                                                                                                                 | Biopolymer transport proteins                                                                                                                                                                                                                                                                                                                                                                                                                                                                                                                                                                                                                                                                                                                                                                                                                                                                                                                 |
| Bxv13230 CDS CDS     | 20.2 | 6.5  | 14.1  | U       | COG0653                                                                                                                                 | Preprotein translocase subunit SecA (ATPase, RNA helicase)                                                                                                                                                                                                                                                                                                                                                                                                                                                                                                                                                                                                                                                                                                                                                                                                                                                                                    |
| Bova0531 CDS CDS     | 1.0  | 0.3  | 13.6  | U       | COG0552                                                                                                                                 | Signal recognition particle GTPase                                                                                                                                                                                                                                                                                                                                                                                                                                                                                                                                                                                                                                                                                                                                                                                                                                                                                                            |
| Dlon0062 CDS CDS     | 1.5  | 0.5  | 13.6  | U       | COG0681                                                                                                                                 | Signal peptidase I                                                                                                                                                                                                                                                                                                                                                                                                                                                                                                                                                                                                                                                                                                                                                                                                                                                                                                                            |
| TS28Dor2597 CDS CDS  | 1.5  | 0.5  | 13.6  | U       | COG0681                                                                                                                                 | Signal peptidase I                                                                                                                                                                                                                                                                                                                                                                                                                                                                                                                                                                                                                                                                                                                                                                                                                                                                                                                            |
| TS28Rum08891 CDS CDS | 3.0  | 1.0  | 13.6  | U       | COG0552                                                                                                                                 | Signal recognition particle GTPase                                                                                                                                                                                                                                                                                                                                                                                                                                                                                                                                                                                                                                                                                                                                                                                                                                                                                                            |
| FpraM2121290 CDS CDS | 17.0 | 6.0  | 12.9  | U       | COG0706                                                                                                                                 | Preprotein translocase subunit YidC                                                                                                                                                                                                                                                                                                                                                                                                                                                                                                                                                                                                                                                                                                                                                                                                                                                                                                           |
| Msmi750624 CDS CDS   | 0.7  | 0.3  | 12.7  | U       | COG0201                                                                                                                                 | Preprotein translocase subunit SecY                                                                                                                                                                                                                                                                                                                                                                                                                                                                                                                                                                                                                                                                                                                                                                                                                                                                                                           |

|                      |      |       |       |     |                 |                                                                                                               |
|----------------------|------|-------|-------|-----|-----------------|---------------------------------------------------------------------------------------------------------------|
| Msmi741055 CDS CDS   | 0.7  | 0.3   | 12.7  | U   | COG0201         | Preprotein translocase subunit SecY                                                                           |
| TS28Met0775 CDS CDS  | 0.7  | 0.3   | 12.7  | U   | COG0201         | Preprotein translocase subunit SecY                                                                           |
| Buni1275 CDS CDS     | 23.2 | 9.0   | 11.7  | U   | COG0811         | Biopolymer transport proteins                                                                                 |
| Bxv11665 CDS CDS     | 7.5  | 3.2   | 10.7  | U   | COG0201         | Preprotein translocase subunit SecY                                                                           |
| Bum0653 CDS CDS      | 1.2  | 0.5   | 10.6  | U   | COG2095         | Multiple antibiotic transporter                                                                               |
| TS28Rum14251 CDS CDS | 12.5 | 5.5   | 10.3  | U   | COG0541         | Signal recognition particle GTPase                                                                            |
| TS29Par585 CDS CDS   | 26.5 | 12.0  | 10.0  | U   | COG0811         | Biopolymer transport proteins                                                                                 |
| TS29Fae01397 CDS CDS | 2.0  | 92.0  | 0.1   | U   | COG3843         | Type IV secretory pathway, VirD2 components (relaxase)                                                        |
| TS29Fae01289 CDS CDS | 1.3  | 63.0  | 0.1   | U   | COG3505         | Type IV secretory pathway, VirD4 components                                                                   |
| TS29Rum11722 CDS CDS | 2.0  | 103.0 | 0.1   | U   | COG3505         | Type IV secretory pathway, VirD4 components                                                                   |
| TS29Fae10381 CDS CDS | 0.8  | 43.0  | 0.1   | U   | COG3505         | Type IV secretory pathway, VirD4 components                                                                   |
| TS29Bif1382 CDS CDS  | 0.5  | 26.0  | 0.1   | U   | COG0201         | Preprotein translocase subunit SecY                                                                           |
| TS29Fae00098 CDS CDS | 2.5  | 130.5 | 0.1   | U   | COG0342 COG0341 | Preprotein translocase subunit SecD Preprotein translocase subunit SecF                                       |
| TS29Fae10726 CDS CDS | 1.2  | 61.0  | 0.1   | U   | COG3451         | Type IV secretory pathway, VirB4 components                                                                   |
| TS29Fae04674 CDS CDS | 2.0  | 105.0 | 0.1   | U   | COG3505         | Type IV secretory pathway, VirD4 components                                                                   |
| TS29Bac00458 CDS CDS | 1.0  | 53.5  | 0.1   | U   | COG3451         | Type IV secretory pathway, VirB4 components                                                                   |
| TS28Fae13923 CDS CDS | 1.0  | 53.7  | 0.1   | U   | COG3843         | Type IV secretory pathway, VirD2 components (relaxase)                                                        |
| Ceut2212 CDS CDS     | 0.1  | 6.1   | 0.1   | U   | COG3843         | Type IV secretory pathway, VirD2 components (relaxase)                                                        |
| Cspl20085 CDS CDS    | 0.7  | 39.5  | 0.1   | U   | COG3505         | Type IV secretory pathway, VirD4 components                                                                   |
| FpraM2122499 CDS CDS | 0.7  | 39.5  | 0.1   | U   | COG3505         | Type IV secretory pathway, VirD4 components                                                                   |
| TS29Fae09127 CDS CDS | 2.0  | 115.0 | 0.1   | U   | COG3451         | Type IV secretory pathway, VirB4 components                                                                   |
| TS29Coi1918 CDS CDS  | 1.6  | 93.0  | 0.1   | U   | COG0653         | Preprotein translocase subunit SecA (ATPase, RNA helicase)                                                    |
| TS29Rum20437 CDS CDS | 1.0  | 58.7  | 0.1   | U   | COG3843         | Type IV secretory pathway, VirD2 components (relaxase)                                                        |
| TS29Dor2297 CDS CDS  | 0.1  | 6.6   | 0.1   | U   | COG3843         | Type IV secretory pathway, VirD2 components (relaxase)                                                        |
| TS29Bac05888 CDS CDS | 0.3  | 15.0  | 0.1   | U   | COG3505         | Type IV secretory pathway, VirD4 components                                                                   |
| TS28Bif3841 CDS CDS  | 0.3  | 15.8  | 0.1   | U   | COG0541         | Signal recognition particle GTPase                                                                            |
| TS29Rum21254 CDS CDS | 1.5  | 101.0 | 0.1   | U   | COG3505         | Type IV secretory pathway, VirD4 components                                                                   |
| TS29Fae06656 CDS CDS | 1.0  | 69.0  | 0.1   | U   | COG3505         | Type IV secretory pathway, VirD4 components                                                                   |
| TS29Bif0851 CDS CDS  | 1.3  | 87.2  | 0.1   | U   | COG0541         | Signal recognition particle GTPase                                                                            |
| TS29Rum18707 CDS CDS | 1.0  | 72.0  | 0.1   | U   | COG3505         | Type IV secretory pathway, VirB4 components                                                                   |
| TS29Eub2193 CDS CDS  | 0.5  | 36.3  | 0.1   | U   | COG3505         | Type IV secretory pathway, VirD4 components                                                                   |
| TS28Fae13937 CDS CDS | 0.3  | 18.5  | 0.1   | U   | COG3505         | Type IV secretory pathway, VirB4 components                                                                   |
| TS29Fae09693 CDS CDS | 0.4  | 29.9  | 0.1   | U   | COG3451         | Type IV secretory pathway, VirB4 components                                                                   |
| Ccom2214 CDS CDS     | 0.1  | 12.5  | 0.1   | U   | COG3843         | Type IV secretory pathway, VirD2 components (relaxase)                                                        |
| CspM6211931 CDS CDS  | 0.1  | 12.5  | 0.1   | U   | COG3843         | Type IV secretory pathway, VirD2 components (relaxase)                                                        |
| TS29Fae08481 CDS CDS | 0.3  | 31.0  | 0.0   | U   | COG0541         | Signal recognition particle GTPase                                                                            |
| TS29Fae10403 CDS CDS | 0.5  | 47.0  | 0.0   | U   | COG3843         | Type IV secretory pathway, VirD2 components (relaxase)                                                        |
| TS29Fae07278 CDS CDS | 2.0  | 194.0 | 0.0   | U   | COG3505         | Type IV secretory pathway, VirD4 components                                                                   |
| Bcap2364 CDS CDS     | 0.3  | 33.5  | 0.0   | U   | COG3451         | Type IV secretory pathway, VirB4 components                                                                   |
| TS29Rum11716 CDS CDS | 0.5  | 51.5  | 0.0   | U   | COG3451         | Type IV secretory pathway, VirB4 components                                                                   |
| TS29Bif1234 CDS CDS  | 0.3  | 28.8  | 0.0   | U   | COG0541         | Signal recognition particle GTPase                                                                            |
| Rbro1725 CDS CDS     | 0.1  | 13.9  | 0.0   | U   | COG3843         | Type IV secretory pathway, VirD2 components (relaxase)                                                        |
| Dfor2029 CDS CDS     | 0.1  | 13.9  | 0.0   | U   | COG3843         | Type IV secretory pathway, VirD2 components (relaxase)                                                        |
| Cnex2284 CDS CDS     | 0.1  | 13.9  | 0.0   | U   | COG3843         | Type IV secretory pathway, VirD2 components (relaxase)                                                        |
| CspM6211851 CDS CDS  | 0.1  | 13.9  | 0.0   | U   | COG3843         | Type IV secretory pathway, VirD2 components (relaxase)                                                        |
| TS29Rum11726 CDS CDS | 1.0  | 127.0 | 0.0   | U   | COG3843         | Type IV secretory pathway, VirD2 components (relaxase)                                                        |
| Acol2785 CDS CDS     | 0.1  | 14.4  | 0.0   | U   | COG3843         | Type IV secretory pathway, VirD2 components (relaxase)                                                        |
| FpraM2122489 CDS CDS | 0.4  | 53.2  | 0.0   | U   | COG3451         | Type IV secretory pathway, VirB4 components                                                                   |
| TS28Eub6909 CDS CDS  | 0.5  | 69.0  | 0.0   | U   | COG3451         | Type IV secretory pathway, VirB4 components                                                                   |
| TS28Bif3026 CDS CDS  | 0.1  | 10.7  | 0.0   | U   | COG0653         | Preprotein translocase subunit SecA (ATPase, RNA helicase)                                                    |
| Acaec2256 CDS CDS    | 0.1  | 15.4  | 0.0   | U   | COG3843         | Type IV secretory pathway, VirD2 components (relaxase)                                                        |
| Cspl20091 CDS CDS    | 0.4  | 57.2  | 0.0   | U   | COG3451         | Type IV secretory pathway, VirB4 components                                                                   |
| TS28Bif0433 CDS CDS  | 0.3  | 37.7  | 0.0   | U   | COG0541         | Signal recognition particle GTPase                                                                            |
| TS29Fae04668 CDS CDS | 0.1  | 22.2  | 0.0   | U   | COG3843         | Type IV secretory pathway, VirD2 components (relaxase)                                                        |
| Cmet2529 CDS CDS     | 0.1  | 23.5  | 0.0   | U   | COG3843         | Type IV secretory pathway, VirD2 components (relaxase)                                                        |
| TS29Bif0664 CDS CDS  | 0.3  | 43.9  | 0.0   | U   | COG0552         | Signal recognition particle GTPase                                                                            |
| TS28Bif1091 CDS CDS  | 0.3  | 43.9  | 0.0   | U   | COG0552         | Signal recognition particle GTPase                                                                            |
| TS29Fae03326 CDS CDS | 1.0  | 183.0 | 0.0   | U   | COG3451         | Type IV secretory pathway, VirB4 components                                                                   |
| Bpse1555 CDS CDS     | 0.1  | 16.2  | 0.0   | U   | COG0653         | Preprotein translocase subunit SecA (ATPase, RNA helicase)                                                    |
| FpraM2120047 CDS CDS | 0.1  | 30.9  | 0.0   | U   | COG3843         | Type IV secretory pathway, VirD2 components (relaxase)                                                        |
| TS29Bif2193 CDS CDS  | 0.1  | 27.2  | 0.0   | U   | COG0653         | Preprotein translocase subunit SecA (ATPase, RNA helicase)                                                    |
| Cnex1094 CDS CDS     | 0.1  | 47.7  | 0.0   | U   | COG3843         | Type IV secretory pathway, VirD2 components (relaxase)                                                        |
| FpraM2122523 CDS CDS | 0.1  | 59.2  | 0.0   | U   | COG3843         | Type IV secretory pathway, VirD2 components (relaxase)                                                        |
| Bhan2474 CDS CDS     | 0.1  | 69.8  | 0.0   | U   | COG3843         | Type IV secretory pathway, VirD2 components (relaxase)                                                        |
| TS28Clo00181 CDS CDS | 0.1  | 6.0   | 0.1   | U V | COG1131 COG3843 | ABC-type multidrug transport system, ATPase component Type IV secretory pathway, VirD2 components (relaxase)  |
| Robe0610 CDS CDS     | 33.5 | 1.5   | 101.4 | V   | COG1131         | ABC-type multidrug transport system, ATPase component                                                         |
| Cbo13940 CDS CDS     | 25.0 | 2.0   | 56.7  | V   | COG0610         | Type I site-specific restriction-modification system, R (restriction) subunit and related helicases           |
| Bum0096 CDS CDS      | 5.0  | 0.5   | 45.4  | V   | COG1566         | Multidrug resistance efflux pump                                                                              |
| TS28Bac7264 CDS CDS  | 3.2  | 0.3   | 43.1  | V   | COG1680         | Beta-lactamase class C and other penicillin binding proteins                                                  |
| TS29Rum04363 CDS CDS | 34.5 | 4.5   | 34.8  | V   | COG1131         | ABC-type multidrug transport system, ATPase component                                                         |
| TS28Eub4107 CDS CDS  | 22.3 | 3.0   | 33.8  | V   | COG0534         | Na <sup>+</sup> -driven multidrug efflux pump                                                                 |
| TS28Rum00257 CDS CDS | 14.5 | 2.0   | 32.9  | V   | COG1511 COG0577 | Predicted membrane protein ABC-type antimicrobial peptide transport system, permease component                |
| TS28Fae03234 CDS CDS | 7.0  | 1.0   | 31.8  | V   | COG1132         | ABC-type multidrug transport system, ATPase and permease components                                           |
| BactD14371 CDS CDS   | 1.7  | 0.3   | 30.3  | V   | COG1566         | Multidrug resistance efflux pump                                                                              |
| TS28Coi0035 CDS CDS  | 6.0  | 1.0   | 27.2  | V   | COG2720         | Uncharacterized vancomycin resistance protein                                                                 |
| Acaec2646 CDS CDS    | 6.0  | 1.0   | 27.2  | V   | COG0534         | Na <sup>+</sup> -driven multidrug efflux pump                                                                 |
| TS28Clo02834 CDS CDS | 10.0 | 2.0   | 22.7  | V   | COG0534         | Na <sup>+</sup> -driven multidrug efflux pump                                                                 |
| TS28Fae15041 CDS CDS | 5.0  | 1.0   | 22.7  | V   | COG1136         | ABC-type antimicrobial peptide transport system, ATPase component                                             |
| Bfin1971 CDS CDS     | 2.3  | 0.5   | 20.4  | V   | COG1131 COG0842 | ABC-type multidrug transport system, ATPase component ABC-type multidrug transport system, permease component |
| Ccom1393 CDS CDS     | 4.0  | 1.0   | 18.2  | V   | COG1132         | ABC-type multidrug transport system, ATPase and permease components                                           |
| ShigsnD91560 CDS CDS | 2.0  | 0.5   | 18.2  | V   | COG0841         | Cation/multidrug efflux pump                                                                                  |
| TS28Fae16886 CDS CDS | 7.3  | 2.0   | 16.6  | V   | COG0577         | ABC-type antimicrobial peptide transport system, permease component                                           |
| TS28Met1299 CDS CDS  | 20.0 | 6.0   | 15.1  | V   | COG3587         | Restriction endonuclease                                                                                      |
| Bfin1970 CDS CDS     | 0.8  | 0.3   | 15.1  | V   | COG1131 COG0842 | ABC-type multidrug transport system, ATPase component ABC-type multidrug transport system, permease component |
| Casp3525 CDS CDS     | 3.0  | 1.0   | 13.6  | V   | COG0841         | Cation/multidrug efflux pump                                                                                  |
| TS29Eub1048 CDS CDS  | 1.5  | 0.5   | 13.6  | V   | COG2367         | Beta-lactamase class A                                                                                        |
| TS28Fae09515 CDS CDS | 1.5  | 0.5   | 13.6  | V   | COG0577         | ABC-type antimicrobial peptide transport system, permease component                                           |
| Rumhdy1358 CDS CDS   | 3.0  | 1.0   | 13.6  | V   | COG0534         | Na <sup>+</sup> -driven multidrug efflux pump                                                                 |
| Dlon2263 CDS CDS     | 3.0  | 1.0   | 13.6  | V   | COG1136         | ABC-type antimicrobial peptide transport system, ATPase component                                             |
| Buni1907 CDS CDS     | 1.5  | 0.5   | 13.6  | V   | COG0534         | Na <sup>+</sup> -driven multidrug efflux pump                                                                 |
| Rena1186 CDS CDS     | 6.0  | 2.0   | 13.6  | V   | COG1131         | ABC-type multidrug transport system, ATPase component                                                         |

|                        |     |       |      |   |                 |                                                                                                                                                                                                         |
|------------------------|-----|-------|------|---|-----------------|---------------------------------------------------------------------------------------------------------------------------------------------------------------------------------------------------------|
| TS28Rum01498 CDS CDS   | 8.0 | 3.0   | 12.1 | V | COG1136         | ABC-type antimicrobial peptide transport system, ATPase component                                                                                                                                       |
| TS29Clo1723 CDS CDS    | 5.0 | 2.0   | 11.3 | V | COG0534         | Na <sup>+</sup> -driven multidrug efflux pump                                                                                                                                                           |
| Svar1818 CDS CDS       | 3.5 | 1.5   | 10.6 | V | COG0610         | Type I site-specific restriction-modification system, R (restriction) subunit and related helicases                                                                                                     |
| TS28Bac0828 CDS CDS    | 2.3 | 1.0   | 10.6 | V | COG0842         | ABC-type multidrug transport system, permease component                                                                                                                                                 |
| Bum12397 CDS CDS       | 2.3 | 1.0   | 10.6 | V | COG0842         | ABC-type multidrug transport system, permease component                                                                                                                                                 |
| TS29Fae04986 CDS CDS   | 0.5 | 23.0  | 0.1  | V | COG0534         | Na <sup>+</sup> -driven multidrug efflux pump                                                                                                                                                           |
| TS29RumUnc0805 CDS CDS | 1.2 | 56.0  | 0.1  | V | COG2274 COG1132 | ABC-type bacteriocin/lantibiotic exporters, contain an N-terminal double-glycine peptidase domain ABC-type multidrug transport system, ATPase and permease components                                   |
| TS29Rum00887 CDS CDS   | 1.0 | 47.0  | 0.1  | V | COG1131 COG4586 | ABC-type multidrug transport system, ATPase component ABC-type uncharacterized transport system, ATPase component                                                                                       |
| TS28Bif2147 CDS CDS    | 1.8 | 83.8  | 0.1  | V | COG1132         | ABC-type multidrug transport system, ATPase and permease components                                                                                                                                     |
| TS29Bif3576 CDS CDS    | 1.8 | 83.8  | 0.1  | V | COG1132         | ABC-type multidrug transport system, ATPase and permease components                                                                                                                                     |
| TS28Fae16686 CDS CDS   | 1.0 | 49.0  | 0.1  | V | COG1132         | ABC-type multidrug transport system, ATPase and permease components                                                                                                                                     |
| TS29Col0612 CDS CDS    | 0.5 | 25.0  | 0.1  | V | COG1136 COG0577 | ABC-type antimicrobial peptide transport system, ATPase component ABC-type antimicrobial peptide transport system, permease component                                                                   |
| TS29Col0160 CDS CDS    | 2.0 | 100.0 | 0.1  | V | COG0577         | ABC-type antimicrobial peptide transport system, permease component                                                                                                                                     |
| TS29Met1109 CDS CDS    | 0.2 | 10.0  | 0.1  | V | COG1968         | Uncharacterized bacitracin resistance protein                                                                                                                                                           |
| TS28Fae10051 CDS CDS   | 0.3 | 12.5  | 0.1  | V | COG0534         | Na <sup>+</sup> -driven multidrug efflux pump                                                                                                                                                           |
| TS29Fae00033 CDS CDS   | 1.0 | 50.5  | 0.1  | V | COG1131 COG4152 | ABC-type multidrug transport system, ATPase component ABC-type uncharacterized transport system, ATPase component                                                                                       |
| TS29Eub2241 CDS CDS    | 0.7 | 34.8  | 0.1  | V | COG1131         | ABC-type multidrug transport system, ATPase component                                                                                                                                                   |
| TS29Rum00591 CDS CDS   | 2.0 | 105.0 | 0.1  | V | COG0577         | ABC-type antimicrobial peptide transport system, permease component                                                                                                                                     |
| TS29Fae03185 CDS CDS   | 1.5 | 81.5  | 0.1  | V | COG0534         | Na <sup>+</sup> -driven multidrug efflux pump                                                                                                                                                           |
| TS28Bif2178 CDS CDS    | 3.0 | 170.5 | 0.1  | V | COG0577         | ABC-type antimicrobial peptide transport system, permease component                                                                                                                                     |
| TS29Fae05986 CDS CDS   | 4.5 | 265.5 | 0.1  | V | COG0610         | Type I site-specific restriction-modification system, R (restriction) subunit and related helicases                                                                                                     |
| TS29Col0183 CDS CDS    | 1.0 | 61.0  | 0.1  | V | COG1132         | ABC-type multidrug transport system, ATPase and permease components                                                                                                                                     |
| Dfor3033 CDS CDS       | 0.8 | 51.0  | 0.1  | V | COG0577         | ABC-type antimicrobial peptide transport system, permease component                                                                                                                                     |
| TS29Rum17015 CDS CDS   | 1.0 | 62.0  | 0.1  | V | COG2367         | Beta-lactamase class A                                                                                                                                                                                  |
| TS28Bif0394 CDS CDS    | 0.7 | 46.7  | 0.1  | V | COG0577         | ABC-type antimicrobial peptide transport system, permease component                                                                                                                                     |
| TS29Rum17812 CDS CDS   | 1.0 | 64.3  | 0.1  | V | COG0577         | ABC-type antimicrobial peptide transport system, permease component                                                                                                                                     |
| TS29Fae09999 CDS CDS   | 1.5 | 97.0  | 0.1  | V | COG0534         | Na <sup>+</sup> -driven multidrug efflux pump                                                                                                                                                           |
| TS28Fae20830 CDS CDS   | 1.0 | 65.0  | 0.1  | V | COG1136         | ABC-type antimicrobial peptide transport system, ATPase component                                                                                                                                       |
| TS29Met0430 CDS CDS    | 0.2 | 13.0  | 0.1  | V | COG1132         | ABC-type multidrug transport system, ATPase and permease components                                                                                                                                     |
| TS29Bac03034 CDS CDS   | 0.3 | 22.3  | 0.1  | V | COG0534         | Na <sup>+</sup> -driven multidrug efflux pump                                                                                                                                                           |
| TS28Bif3386 CDS CDS    | 1.1 | 74.5  | 0.1  | V | COG1136         | ABC-type antimicrobial peptide transport system, ATPase component                                                                                                                                       |
| TS29Bif2482 CDS CDS    | 1.1 | 74.5  | 0.1  | V | COG1136         | ABC-type antimicrobial peptide transport system, ATPase component                                                                                                                                       |
| Cnex0563 CDS CDS       | 0.5 | 34.5  | 0.1  | V | COG0577         | ABC-type antimicrobial peptide transport system, permease component                                                                                                                                     |
| Caer1097 CDS CDS       | 1.0 | 69.0  | 0.1  | V | COG0577         | ABC-type antimicrobial peptide transport system, permease component                                                                                                                                     |
| TS29Col0414 CDS CDS    | 1.0 | 69.0  | 0.1  | V | COG1132         | ABC-type multidrug transport system, ATPase and permease components                                                                                                                                     |
| TS28Fae19470 CDS CDS   | 0.5 | 35.0  | 0.1  | V | COG0534         | Na <sup>+</sup> -driven multidrug efflux pump                                                                                                                                                           |
| TS28Fae21401 CDS CDS   | 0.5 | 35.5  | 0.1  | V | COG1132         | ABC-type multidrug transport system, ATPase and permease components                                                                                                                                     |
| Bhan2441 CDS CDS       | 0.5 | 35.5  | 0.1  | V | COG1131         | ABC-type multidrug transport system, ATPase component                                                                                                                                                   |
| CspM6212143 CDS CDS    | 0.4 | 28.6  | 0.1  | V | COG0577         | ABC-type antimicrobial peptide transport system, permease component                                                                                                                                     |
| Rint1_10498 CDS CDS    | 0.4 | 28.6  | 0.1  | V | COG0577         | ABC-type antimicrobial peptide transport system, permease component                                                                                                                                     |
| Ehal1055 CDS CDS       | 0.3 | 23.9  | 0.1  | V | COG0577         | ABC-type antimicrobial peptide transport system, permease component                                                                                                                                     |
| TS29Col0734 CDS CDS    | 0.5 | 36.0  | 0.1  | V | COG1968         | Uncharacterized bacitracin resistance protein                                                                                                                                                           |
| TS28Bif0409 CDS CDS    | 1.0 | 73.9  | 0.1  | V | COG2348         | Uncharacterized protein involved in methicillin resistance                                                                                                                                              |
| TS29Bif0875 CDS CDS    | 1.0 | 73.9  | 0.1  | V | COG2348         | Uncharacterized protein involved in methicillin resistance                                                                                                                                              |
| TS29Rum17241 CDS CDS   | 1.0 | 75.5  | 0.1  | V | COG0534         | Na <sup>+</sup> -driven multidrug efflux pump                                                                                                                                                           |
| TS29Bac10525 CDS CDS   | 1.0 | 76.0  | 0.1  | V | COG1401         | GTPase subunit of restriction endonuclease                                                                                                                                                              |
| TS29Rum17801 CDS CDS   | 0.4 | 30.8  | 0.1  | V | COG0577         | ABC-type antimicrobial peptide transport system, permease component                                                                                                                                     |
| TS29Bif2905 CDS CDS    | 1.5 | 116.5 | 0.1  | V | COG0732 COG0286 | Restriction endonuclease S subunits Type I restriction-modification system methyltransferase subunit                                                                                                    |
| TS29Rum16961 CDS CDS   | 1.0 | 79.0  | 0.1  | V | COG0534         | Na <sup>+</sup> -driven multidrug efflux pump                                                                                                                                                           |
| TS29Bif0890 CDS CDS    | 0.7 | 58.7  | 0.1  | V | COG0577         | ABC-type antimicrobial peptide transport system, permease component                                                                                                                                     |
| CspSS20181 CDS CDS     | 0.4 | 32.1  | 0.1  | V | COG0577         | ABC-type antimicrobial peptide transport system, permease component                                                                                                                                     |
| TS28Fae00274 CDS CDS   | 1.0 | 84.0  | 0.1  | V | COG2367         | Beta-lactamase class A                                                                                                                                                                                  |
| TS29Fae03651 CDS CDS   | 0.3 | 21.0  | 0.1  | V | COG0534         | Na <sup>+</sup> -driven multidrug efflux pump                                                                                                                                                           |
| TS28Bif0499 CDS CDS    | 1.0 | 87.5  | 0.1  | V | COG1401         | GTPase subunit of restriction endonuclease                                                                                                                                                              |
| TS29Bif0791 CDS CDS    | 1.0 | 87.5  | 0.1  | V | COG1401         | GTPase subunit of restriction endonuclease                                                                                                                                                              |
| TS29Fae08598 CDS CDS   | 1.0 | 87.5  | 0.1  | V | COG0534         | Na <sup>+</sup> -driven multidrug efflux pump                                                                                                                                                           |
| TS28Bif2146 CDS CDS    | 0.5 | 44.4  | 0.1  | V | COG1132         | ABC-type multidrug transport system, ATPase and permease components                                                                                                                                     |
| TS29Fae08216 CDS CDS   | 1.0 | 89.0  | 0.1  | V | COG0534         | Na <sup>+</sup> -driven multidrug efflux pump                                                                                                                                                           |
| TS28Fae02079 CDS CDS   | 0.5 | 46.5  | 0.0  | V | COG1132         | ABC-type multidrug transport system, ATPase and permease components                                                                                                                                     |
| TS28Fae21416 CDS CDS   | 0.5 | 47.5  | 0.0  | V | COG1132         | ABC-type multidrug transport system, ATPase and permease components                                                                                                                                     |
| Robe3151 CDS CDS       | 0.3 | 32.9  | 0.0  | V | COG0577         | ABC-type antimicrobial peptide transport system, permease component                                                                                                                                     |
| TS29Fae07758 CDS CDS   | 1.0 | 101.0 | 0.0  | V | COG0610         | Type I site-specific restriction-modification system, R (restriction) subunit and related helicases                                                                                                     |
| TS28Fae00028 CDS CDS   | 1.0 | 101.0 | 0.0  | V | COG0534         | Na <sup>+</sup> -driven multidrug efflux pump                                                                                                                                                           |
| TS29Bif2733 CDS CDS    | 1.0 | 106.0 | 0.0  | V | COG0534         | Na <sup>+</sup> -driven multidrug efflux pump                                                                                                                                                           |
| TS29Fae05673 CDS CDS   | 0.5 | 54.5  | 0.0  | V | COG1131         | ABC-type multidrug transport system, ATPase component                                                                                                                                                   |
| TS28Bif2167 CDS CDS    | 0.8 | 83.0  | 0.0  | V | COG1132         | ABC-type multidrug transport system, ATPase and permease components                                                                                                                                     |
| TS29Bif3559 CDS CDS    | 0.8 | 83.0  | 0.0  | V | COG1132         | ABC-type multidrug transport system, ATPase and permease components                                                                                                                                     |
| TS29Fae03471 CDS CDS   | 1.0 | 113.0 | 0.0  | V | COG0732 COG0286 | Restriction endonuclease S subunits Type I restriction-modification system methyltransferase subunit                                                                                                    |
| Ccom2195 CDS CDS       | 0.3 | 30.2  | 0.0  | V | COG0577         | ABC-type antimicrobial peptide transport system, permease component                                                                                                                                     |
| TS29Rum01134 CDS CDS   | 0.3 | 30.4  | 0.0  | V | COG0577         | ABC-type antimicrobial peptide transport system, permease component                                                                                                                                     |
| TS29Dor2331 CDS CDS    | 1.7 | 214.5 | 0.0  | V | COG0577         | ABC-type antimicrobial peptide transport system, permease component                                                                                                                                     |
| TS28Bif0393 CDS CDS    | 0.4 | 52.5  | 0.0  | V | COG0577         | ABC-type antimicrobial peptide transport system, permease component                                                                                                                                     |
| TS29Rum20467 CDS CDS   | 0.8 | 111.0 | 0.0  | V | COG0577         | ABC-type antimicrobial peptide transport system, permease component                                                                                                                                     |
| TS29Bif3989 CDS CDS    | 1.0 | 136.4 | 0.0  | V | COG0610         | Type I site-specific restriction-modification system, R (restriction) subunit and related helicases                                                                                                     |
| Chol3892 CDS CDS       | 1.0 | 142.5 | 0.0  | V | COG1131         | ABC-type multidrug transport system, ATPase component                                                                                                                                                   |
| TS29Fae06705 CDS CDS   | 0.5 | 71.5  | 0.0  | V | COG1132         | ABC-type multidrug transport system, ATPase and permease components                                                                                                                                     |
| TS29Bif1724 CDS CDS    | 0.5 | 81.0  | 0.0  | V | COG4096 COG0610 | Type I site-specific restriction-modification system, R (restriction) subunit and related helicases Type I site-specific restriction-modification system, R (restriction) subunit and related helicases |
| TS29Fae09855 CDS CDS   | 0.5 | 83.0  | 0.0  | V | COG0577         | ABC-type antimicrobial peptide transport system, permease component                                                                                                                                     |
| TS29Fae00901 CDS CDS   | 0.8 | 146.5 | 0.0  | V | COG1132         | ABC-type multidrug transport system, ATPase and permease components                                                                                                                                     |
| TS29Bif1718 CDS CDS    | 0.3 | 59.0  | 0.0  | V | COG0286         | Type I restriction-modification system methyltransferase subunit                                                                                                                                        |
| TS28Dor2457 CDS CDS    | 0.3 | 45.8  | 0.0  | V | COG0577         | ABC-type antimicrobial peptide transport system, permease component                                                                                                                                     |
| Dfor1879 CDS CDS       | 0.3 | 45.8  | 0.0  | V | COG0577         | ABC-type antimicrobial peptide transport system, permease component                                                                                                                                     |
| TS29Bif0891 CDS CDS    | 0.4 | 75.5  | 0.0  | V | COG0577         | ABC-type antimicrobial peptide transport system, permease component                                                                                                                                     |

|                                  |      |       |      |     |                         |                                                                                                                                                                       |
|----------------------------------|------|-------|------|-----|-------------------------|-----------------------------------------------------------------------------------------------------------------------------------------------------------------------|
| TS29Fae05251 CDS CDS             | 1.0  | 210.0 | 0.0  | V   | COG0610                 | Type I site-specific restriction-modification system, R (restriction) subunit and related helicases                                                                   |
| TS29Fae00939 CDS CDS             | 1.0  | 217.0 | 0.0  | V   | COG0577                 | ABC-type antimicrobial peptide transport system, permease component                                                                                                   |
| TS29Fae05248 CDS CDS             | 1.0  | 241.0 | 0.0  | V   | COG0286                 | Type I restriction-modification system methyltransferase subunit                                                                                                      |
| TS29Bif3577 CDS CDS              | 0.5  | 127.1 | 0.0  | V   | COG1132                 | ABC-type multidrug transport system, ATPase and permease components                                                                                                   |
| TS29Fae00937 CDS CDS             | 0.5  | 146.5 | 0.0  | V   | COG0577                 | ABC-type antimicrobial peptide transport system, permease component                                                                                                   |
| TS29Fae00900 CDS CDS             | 0.5  | 159.5 | 0.0  | V   | COG1132                 | ABC-type multidrug transport system, ATPase and permease components                                                                                                   |
| TS29Bif3560 CDS CDS              | 0.3  | 88.1  | 0.0  | V   | COG1132                 | ABC-type multidrug transport system, ATPase and permease components                                                                                                   |
| TS28Bif2166 CDS CDS              | 0.3  | 88.1  | 0.0  | V   | COG1132                 | ABC-type multidrug transport system, ATPase and permease components                                                                                                   |
| Caer1663 CDS CDS                 | 9.5  | 2.0   | 21.6 | V O | COG1132 COG5265         | ABC-type multidrug transport system, ATPase and permease components ABC-type transport system involved in Fe-S cluster assembly, permease and ATPase components       |
| Cnex0562 CDS CDS                 | 0.2  | 67.0  | 0.0  | V Q | COG1136 COG4181         | ABC-type antimicrobial peptide transport system, ATPase component Predicted ABC-type transport system involved in lysophospholipase L1 biosynthesis, ATPase component |
| TS28Col0184 CDS CDS              | 3.0  | 1.0   | 13.6 | Z   | COG5022 COG4603         | Myosin heavy chain ABC-type uncharacterized transport system, permease component                                                                                      |
| Bun1178 CDS CDS                  | 8.8  | 1.5   | 26.5 | R   | COG0073                 | EMAP domain                                                                                                                                                           |
| Cbol1818 CDS CDS                 | 8.0  | 3.0   | 12.1 | R   | COG0073                 | EMAP domain                                                                                                                                                           |
| TS29Fae08154 CDS CDS             | 1.0  | 133.5 | 0.0  | R   | COG0073                 | EMAP domain                                                                                                                                                           |
| TS28Rum00691 CDS CDS             | 4.0  | 1.0   | 18.2 | R   | COG0217                 | Uncharacterized conserved protein                                                                                                                                     |
| Bun12387 CDS CDS                 | 2.8  | 0.3   | 38.6 | R   | COG0220                 | Predicted S-adenosylmethionine-dependent methyltransferase                                                                                                            |
| Bun10170 CDS CDS                 | 9.0  | 1.5   | 27.2 | R   | COG0312                 | Predicted Zn-dependent proteases and their inactivated homologs                                                                                                       |
| Bfveh46066 CDS methyltransferase | 4.0  | 0.5   | 36.3 | R   | COG0313                 | Predicted methyltransferases                                                                                                                                          |
| Cbol3709 CDS CDS                 | 4.0  | 1.0   | 18.2 | R   | COG0319                 | Predicted metal-dependent hydrolase                                                                                                                                   |
| TS29Rum10537 CDS CDS             | 10.0 | 4.0   | 11.3 | R   | COG0319                 | Predicted metal-dependent hydrolase                                                                                                                                   |
| TS28Bif5350 CDS CDS              | 1.5  | 0.7   | 10.2 | R   | COG0327 COG3323         | Uncharacterized conserved protein Uncharacterized protein conserved in bacteria                                                                                       |
| TS28Rum01430 CDS CDS             | 2.5  | 0.5   | 22.7 | R   | COG0327 COG3323 COG1579 | Uncharacterized conserved protein Uncharacterized protein conserved in bacteria Zn-ribbon protein, possibly nucleic acid-binding                                      |
| TS28Rum01029 CDS CDS             | 3.0  | 1.0   | 13.6 | R   | COG0385                 | Predicted Na <sup>+</sup> -dependent transporter                                                                                                                      |
| Bun11333 CDS CDS                 | 2.5  | 1.0   | 11.3 | R   | COG0385                 | Predicted Na <sup>+</sup> -dependent transporter                                                                                                                      |
| TS29Bif3380 CDS CDS              | 0.5  | 48.8  | 0.0  | R   | COG0385                 | Predicted Na <sup>+</sup> -dependent transporter                                                                                                                      |
| TS28Rum14875 CDS CDS             | 2.5  | 0.5   | 22.7 | R   | COG0388                 | Predicted amidohydrolase                                                                                                                                              |
| ShigspD91095 CDS CDS             | 6.0  | 2.0   | 13.6 | R   | COG0388                 | Predicted amidohydrolase                                                                                                                                              |
| TS28Fae22062 CDS CDS             | 0.5  | 24.5  | 0.1  | R   | COG0388                 | Predicted amidohydrolase                                                                                                                                              |
| TS29Bac05743 CDS CDS             | 0.2  | 16.3  | 0.1  | R   | COG0388                 | Predicted amidohydrolase                                                                                                                                              |
| BactD23506 CDS CDS               | 3.0  | 1.0   | 13.6 | R   | COG0393                 | Uncharacterized conserved protein                                                                                                                                     |
| TS29Bif4100 CDS CDS              | 0.3  | 37.5  | 0.0  | R   | COG0400                 | Predicted esterase                                                                                                                                                    |
| TS28Rum05327 CDS CDS             | 3.0  | 1.0   | 13.6 | R   | COG0432                 | Uncharacterized conserved protein                                                                                                                                     |
| ShigspD91354 CDS CDS             | 12.0 | 1.0   | 54.5 | R   | COG0433                 | Predicted ATPase                                                                                                                                                      |
| BactD21452 CDS CDS               | 3.0  | 0.5   | 26.8 | R   | COG0457                 | FOG: TPR repeat                                                                                                                                                       |
| Bun12992 CDS CDS                 | 7.5  | 1.3   | 25.5 | R   | COG0457                 | FOG: TPR repeat                                                                                                                                                       |
| Bxvl3971 CDS CDS                 | 2.5  | 0.5   | 22.7 | R   | COG0457                 | FOG: TPR repeat                                                                                                                                                       |
| Bova3352 CDS CDS                 | 7.3  | 1.5   | 22.0 | R   | COG0457                 | FOG: TPR repeat                                                                                                                                                       |
| Bxvl4287 CDS CDS                 | 13.9 | 3.3   | 18.9 | R   | COG0457                 | FOG: TPR repeat                                                                                                                                                       |
| TS28Bac1584 CDS CDS              | 4.0  | 1.3   | 13.6 | R   | COG0457                 | FOG: TPR repeat                                                                                                                                                       |
| BactD13074 CDS CDS               | 2.7  | 1.0   | 12.1 | R   | COG0457                 | FOG: TPR repeat                                                                                                                                                       |
| TS28Bif4059 CDS CDS              | 2.5  | 1.0   | 11.3 | R   | COG0457                 | FOG: TPR repeat                                                                                                                                                       |
| Bxvl3879 CDS CDS                 | 4.7  | 2.0   | 10.6 | R   | COG0457                 | FOG: TPR repeat                                                                                                                                                       |
| BactD10941 CDS CDS               | 13.3 | 5.8   | 10.3 | R   | COG0457                 | FOG: TPR repeat                                                                                                                                                       |
| Bxvl2812 CDS CDS                 | 2.0  | 0.5   | 18.2 | R   | COG0457 COG1912         | FOG: TPR repeat Uncharacterized conserved protein                                                                                                                     |
| TS28Fae14951 CDS CDS             | 2.0  | 0.5   | 18.2 | R   | COG0488                 | ATPase components of ABC transporters with duplicated ATPase domains                                                                                                  |
| Bun11258 CDS CDS                 | 2.0  | 0.5   | 18.2 | R   | COG0488                 | ATPase components of ABC transporters with duplicated ATPase domains                                                                                                  |
| Bcap1022 CDS CDS                 | 12.0 | 3.0   | 18.2 | R   | COG0488                 | ATPase components of ABC transporters with duplicated ATPase domains                                                                                                  |
| Bova2773 CDS CDS                 | 1.2  | 0.5   | 10.9 | R   | COG0488                 | ATPase components of ABC transporters with duplicated ATPase domains                                                                                                  |
| TS28Bif0429 CDS CDS              | 0.5  | 63.5  | 0.0  | R   | COG0488                 | ATPase components of ABC transporters with duplicated ATPase domains                                                                                                  |
| TS29Bif0855 CDS CDS              | 0.5  | 63.5  | 0.0  | R   | COG0488                 | ATPase components of ABC transporters with duplicated ATPase domains                                                                                                  |
| TS28Rum13360 CDS CDS             | 2.0  | 0.5   | 18.2 | R   | COG0491                 | Zn-dependent hydrolases, including glyoxylases                                                                                                                        |
| Cbol0207 CDS CDS                 | 15.0 | 2.0   | 34.0 | R   | COG0517                 | FOG: CBS domain                                                                                                                                                       |
| TS28Rum09595 CDS CDS             | 5.2  | 1.0   | 23.5 | R   | COG0517                 | FOG: CBS domain                                                                                                                                                       |
| TS28Met0799 CDS CDS              | 2.3  | 1.0   | 10.2 | R   | COG0517                 | FOG: CBS domain                                                                                                                                                       |
| TS28Bif0660 CDS CDS              | 0.5  | 31.5  | 0.1  | R   | COG0517                 | FOG: CBS domain                                                                                                                                                       |
| TS29Bif3927 CDS CDS              | 0.5  | 31.5  | 0.1  | R   | COG0517                 | FOG: CBS domain                                                                                                                                                       |
| TS28Fae16383 CDS CDS             | 9.5  | 0.5   | 86.3 | R   | COG0523                 | Putative GTPases (G3E family)                                                                                                                                         |
| Fpram2120183 CDS CDS             | 7.0  | 1.0   | 31.8 | R   | COG0523                 | Putative GTPases (G3E family)                                                                                                                                         |
| TS28Rum00814 CDS CDS             | 3.0  | 1.0   | 13.6 | R   | COG0523                 | Putative GTPases (G3E family)                                                                                                                                         |
| Bun11210 CDS CDS                 | 2.5  | 1.0   | 11.3 | R   | COG0523                 | Putative GTPases (G3E family)                                                                                                                                         |
| TS28Fae15327 CDS CDS             | 1.0  | 0.3   | 13.6 | R   | COG0535 COG0641         | Predicted Fe-S oxidoreductases Arvlsulfatase regulator (Fe-S oxidoreductase)                                                                                          |
| TS29Rum20306 CDS CDS             | 1.0  | 49.0  | 0.1  | R   | COG0535 COG4001         | Predicted Fe-S oxidoreductases Predicted metal-binding protein                                                                                                        |
| TS28Bac3716 CDS CDS              | 5.7  | 1.0   | 25.7 | R   | COG0536                 | Predicted GTPase                                                                                                                                                      |
| Bun12659 CDS CDS                 | 5.7  | 1.0   | 25.7 | R   | COG0536                 | Predicted GTPase                                                                                                                                                      |
| Bcap0610 CDS CDS                 | 9.0  | 2.0   | 20.4 | R   | COG0536                 | Predicted GTPase                                                                                                                                                      |
| BactD24141 CDS CDS               | 8.0  | 2.0   | 18.2 | R   | COG0536                 | Predicted GTPase                                                                                                                                                      |
| TS28Fae13876 CDS CDS             | 0.3  | 20.5  | 0.1  | R   | COG0536                 | Predicted GTPase                                                                                                                                                      |
| ShigspD90619 CDS CDS             | 2.0  | 0.5   | 18.2 | R   | COG0546                 | Predicted phosphatases                                                                                                                                                |
| Aput0764 CDS CDS                 | 6.0  | 1.5   | 18.2 | R   | COG0546                 | Predicted phosphatases                                                                                                                                                |
| TS29Rum07641 CDS CDS             | 1.7  | 0.7   | 11.3 | R   | COG0546                 | Predicted phosphatases                                                                                                                                                |
| TS29Al1387 CDS CDS               | 6.0  | 2.5   | 10.9 | R   | COG0546                 | Predicted phosphatases                                                                                                                                                |
| TS29Eub1228 CDS CDS              | 18.0 | 6.0   | 13.6 | R   | COG0561                 | Predicted hydrolases of the HAD superfamily                                                                                                                           |
| Bpse0301 CDS CDS                 | 0.3  | 16.7  | 0.1  | R   | COG0596                 | Predicted hydrolases or acyltransferases (alpha/beta hydrolase superfamily)                                                                                           |
| TS29Bif1703 CDS CDS              | 0.3  | 34.7  | 0.0  | R   | COG0596                 | Predicted hydrolases or acyltransferases (alpha/beta hydrolase superfamily)                                                                                           |
| Aput0061 CDS CDS                 | 10.0 | 2.0   | 22.7 | R   | COG0612                 | Predicted Zn-dependent peptidases                                                                                                                                     |
| Bun11909 CDS CDS                 | 2.0  | 0.5   | 18.2 | R   | COG0612                 | Predicted Zn-dependent peptidases                                                                                                                                     |
| TS29Ceo4230 CDS CDS              | 0.3  | 15.5  | 0.1  | R   | COG0612                 | Predicted Zn-dependent peptidases                                                                                                                                     |
| TS28Rum14512 CDS CDS             | 6.0  | 0.5   | 54.5 | R   | COG0618                 | Exopolysphosphate-related proteins                                                                                                                                    |
| TS28Met0650 CDS CDS              | 0.8  | 0.3   | 11.3 | R   | COG0622                 | Predicted phosphoesterase                                                                                                                                             |
| TS29Rum20812 CDS CDS             | 1.0  | 51.0  | 0.1  | R   | COG0627 COG2845         | Predicted esterase Uncharacterized protein conserved in bacteria                                                                                                      |
| Bun12732 CDS CDS                 | 3.5  | 0.5   | 31.8 | R   | COG0628                 | Predicted permease                                                                                                                                                    |
| TS29Fae08388 CDS CDS             | 1.0  | 88.5  | 0.1  | R   | COG0628                 | Predicted permease                                                                                                                                                    |
| TS29Bif3870 CDS CDS              | 0.3  | 126.6 | 0.0  | R   | COG0628                 | Predicted permease                                                                                                                                                    |
| TS29Bac07753 CDS CDS             | 10.0 | 1.5   | 30.3 | R   | COG0641                 | Arvlsulfatase regulator (Fe-S oxidoreductase)                                                                                                                         |
| TS28Rum01976 CDS CDS             | 3.0  | 0.5   | 27.2 | R   | COG0641                 | Arvlsulfatase regulator (Fe-S oxidoreductase)                                                                                                                         |
| TS29Bac12283 CDS CDS             | 0.5  | 30.0  | 0.1  | R   | COG0641                 | Arvlsulfatase regulator (Fe-S oxidoreductase)                                                                                                                         |
| TS29Bif2391 CDS CDS              | 1.0  | 63.0  | 0.1  | R   | COG0656                 | Aldo/keto reductases, related to diketogulonate reductase                                                                                                             |
| TS29Bif0905 CDS CDS              | 1.0  | 98.5  | 0.0  | R   | COG0656                 | Aldo/keto reductases, related to diketogulonate reductase                                                                                                             |

|                        |       |       |      |   |                 |                                                                                                   |
|------------------------|-------|-------|------|---|-----------------|---------------------------------------------------------------------------------------------------|
| Buni2529 CDS CDS       | 2.3   | 0.5   | 21.2 | R | COG0658 COG2333 | Predicted membrane metal-binding protein Predicted hydrolase (metallo-beta-lactamase superfamily) |
| TS28Bif0324 CDS CDS    | 0.3   | 27.3  | 0.1  | R | COG0658 COG2333 | Predicted membrane metal-binding protein Predicted hydrolase (metallo-beta-lactamase superfamily) |
| Bbre1456 CDS CDS       | 1.7   | 0.3   | 22.5 | R | COG0661         | Predicted unusual protein kinase                                                                  |
| TS28Fae19049 CDS CDS   | 13.5  | 4.0   | 15.3 | R | COG0670         | Integral membrane protein, interacts with FtsH                                                    |
| Clep1251 CDS CDS       | 7.5   | 0.5   | 68.1 | R | COG0673         | Predicted dehydrogenases and related proteins                                                     |
| TS28Clo06642 CDS CDS   | 8.5   | 1.0   | 38.6 | R | COG0673         | Predicted dehydrogenases and related proteins                                                     |
| Bthe3730201 CDS CDS    | 8.5   | 1.0   | 38.6 | R | COG0673         | Predicted dehydrogenases and related proteins                                                     |
| Clep1253 CDS CDS       | 31.0  | 4.0   | 35.2 | R | COG0673         | Predicted dehydrogenases and related proteins                                                     |
| TS29Clo0164 CDS CDS    | 121.8 | 24.0  | 23.0 | R | COG0673         | Predicted dehydrogenases and related proteins                                                     |
| TS28Clo10639 CDS CDS   | 121.8 | 24.0  | 23.0 | R | COG0673         | Predicted dehydrogenases and related proteins                                                     |
| TS28Rum01838 CDS CDS   | 4.0   | 1.0   | 18.2 | R | COG0673         | Predicted dehydrogenases and related proteins                                                     |
| TS29Clo0161 CDS CDS    | 78.5  | 21.0  | 17.0 | R | COG0673         | Predicted dehydrogenases and related proteins                                                     |
| TS28Clo10636 CDS CDS   | 78.5  | 21.0  | 17.0 | R | COG0673         | Predicted dehydrogenases and related proteins                                                     |
| Clep1250 CDS CDS       | 23.5  | 7.0   | 15.2 | R | COG0673         | Predicted dehydrogenases and related proteins                                                     |
| TS28Bac2545 CDS CDS    | 4.3   | 1.5   | 12.9 | R | COG0673         | Predicted dehydrogenases and related proteins                                                     |
| TS29Clo0162 CDS CDS    | 114.0 | 50.0  | 10.4 | R | COG0673         | Predicted dehydrogenases and related proteins                                                     |
| TS29Rum20630 CDS CDS   | 0.5   | 32.0  | 0.1  | R | COG0673         | Predicted dehydrogenases and related proteins                                                     |
| TS29Clo2120 CDS CDS    | 14.0  | 3.7   | 17.3 | R | COG0679         | Predicted permeases                                                                               |
| TS28Bif4771 CDS CDS    | 0.3   | 32.2  | 0.0  | R | COG0679         | Predicted permeases                                                                               |
| TS29Bif3358 CDS CDS    | 0.3   | 49.2  | 0.0  | R | COG0679         | Predicted permeases                                                                               |
| TS28Rum05915 CDS CDS   | 12.0  | 4.0   | 13.6 | R | COG0714         | MoxR-like ATPases                                                                                 |
| RintL11183 CDS CDS     | 3.0   | 1.0   | 13.6 | R | COG0714         | MoxR-like ATPases                                                                                 |
| Aput0430 CDS CDS       | 3.0   | 1.0   | 13.6 | R | COG0714         | MoxR-like ATPases                                                                                 |
| TS29Rum00361 CDS CDS   | 2.0   | 105.0 | 0.1  | R | COG0714         | MoxR-like ATPases                                                                                 |
| TS29Fae03451 CDS CDS   | 1.0   | 87.5  | 0.1  | R | COG0714         | MoxR-like ATPases                                                                                 |
| TS29Bif0462 CDS CDS    | 0.3   | 82.7  | 0.0  | R | COG0728         | Uncharacterized membrane protein, putative virulence factor                                       |
| TS28Bif4394 CDS CDS    | 0.3   | 100.0 | 0.0  | R | COG0728         | Uncharacterized membrane protein, putative virulence factor                                       |
| TS28Rum09648 CDS CDS   | 3.0   | 1.0   | 13.6 | R | COG0733         | Na <sup>+</sup> -dependent transporters of the SNF family                                         |
| Robe0752 CDS CDS       | 3.0   | 1.0   | 13.6 | R | COG0733         | Na <sup>+</sup> -dependent transporters of the SNF family                                         |
| Dlon0654 CDS CDS       | 2.5   | 1.0   | 11.3 | R | COG0733         | Na <sup>+</sup> -dependent transporters of the SNF family                                         |
| TS28Dor2540 CDS CDS    | 2.5   | 1.0   | 11.3 | R | COG0733         | Na <sup>+</sup> -dependent transporters of the SNF family                                         |
| TS29Rum00894 CDS CDS   | 1.0   | 82.0  | 0.1  | R | COG0733         | Na <sup>+</sup> -dependent transporters of the SNF family                                         |
| TS29Rum16824 CDS CDS   | 1.0   | 84.0  | 0.1  | R | COG0733         | Na <sup>+</sup> -dependent transporters of the SNF family                                         |
| TS29Rum15134 CDS CDS   | 6.0   | 1.0   | 27.2 | R | COG0759         | Uncharacterized conserved protein                                                                 |
| TS28Rum14518 CDS CDS   | 11.0  | 3.5   | 14.3 | R | COG0779         | Uncharacterized protein conserved in bacteria                                                     |
| TS29Fae04721 CDS CDS   | 1.0   | 59.5  | 0.1  | R | COG0779         | Uncharacterized protein conserved in bacteria                                                     |
| TS28Fae07638 CDS CDS   | 16.0  | 1.0   | 72.6 | R | COG0802 COG3178 | Predicted ATPase or kinase Predicted phosphotransferase related to Ser/Thr protein kinases        |
| TS29Rum00837 CDS CDS   | 0.5   | 24.0  | 0.1  | R | COG0802 COG3178 | Predicted ATPase or kinase Predicted phosphotransferase related to Ser/Thr protein kinases        |
| Acae2543 CDS CDS       | 3.0   | 1.0   | 13.6 | R | COG0820         | Predicted Fe-S-cluster redox enzyme                                                               |
| TS29Bac08016 CDS CDS   | 0.3   | 26.5  | 0.1  | R | COG0820         | Predicted Fe-S-cluster redox enzyme                                                               |
| RintL10089 CDS CDS     | 0.1   | 8.3   | 0.0  | R | COG0820         | Predicted Fe-S-cluster redox enzyme                                                               |
| Cbol3099 CDS CDS       | 0.1   | 8.3   | 0.0  | R | COG0820         | Predicted Fe-S-cluster redox enzyme                                                               |
| Csci3162 CDS CDS       | 0.1   | 8.3   | 0.0  | R | COG0820         | Predicted Fe-S-cluster redox enzyme                                                               |
| TS29Col1597 CDS CDS    | 0.5   | 48.0  | 0.0  | R | COG0820         | Predicted Fe-S-cluster redox enzyme                                                               |
| CspM6211854 CDS CDS    | 0.1   | 18.1  | 0.0  | R | COG0820         | Predicted Fe-S-cluster redox enzyme                                                               |
| Acae2258 CDS CDS       | 0.1   | 18.1  | 0.0  | R | COG0820         | Predicted Fe-S-cluster redox enzyme                                                               |
| Rbro1726 CDS CDS       | 0.1   | 18.1  | 0.0  | R | COG0820         | Predicted Fe-S-cluster redox enzyme                                                               |
| Ceut2208 CDS CDS       | 0.1   | 18.1  | 0.0  | R | COG0820         | Predicted Fe-S-cluster redox enzyme                                                               |
| Cnex2282 CDS CDS       | 0.1   | 18.1  | 0.0  | R | COG0820         | Predicted Fe-S-cluster redox enzyme                                                               |
| Acol2788 CDS CDS       | 0.1   | 18.1  | 0.0  | R | COG0820         | Predicted Fe-S-cluster redox enzyme                                                               |
| Dfor2027 CDS CDS       | 0.1   | 18.1  | 0.0  | R | COG0820         | Predicted Fe-S-cluster redox enzyme                                                               |
| TS29RumUnc1140 CDS CDS | 7.0   | 3.0   | 10.6 | R | COG0824         | Predicted thioesterase                                                                            |
| TS29Bif3994 CDS CDS    | 0.5   | 34.5  | 0.1  | R | COG1011         | Predicted hydrolase (HAD superfamily)                                                             |
| TS28Bif2025 CDS CDS    | 0.5   | 34.5  | 0.1  | R | COG1011         | Predicted hydrolase (HAD superfamily)                                                             |
| TS29Rum06868 CDS CDS   | 1.3   | 0.3   | 18.2 | R | COG1033         | Predicted exporters of the RND superfamily                                                        |
| Clep1629 CDS CDS       | 10.0  | 3.0   | 15.1 | R | COG1033         | Predicted exporters of the RND superfamily                                                        |
| Riae0133 CDS CDS       | 5.0   | 2.0   | 11.3 | R | COG1033         | Predicted exporters of the RND superfamily                                                        |
| TS28Fae09550 CDS CDS   | 0.3   | 19.3  | 0.1  | R | COG1033         | Predicted exporters of the RND superfamily                                                        |
| TS28Rum10136 CDS CDS   | 1.5   | 0.5   | 13.6 | R | COG1073         | Hydrolases of the alpha/beta superfamily                                                          |
| TS28Fae07359 CDS CDS   | 0.5   | 27.5  | 0.1  | R | COG1073         | Hydrolases of the alpha/beta superfamily                                                          |
| TS28Fae00296 CDS CDS   | 0.5   | 67.0  | 0.0  | R | COG1092         | Predicted SAM-dependent methyltransferases                                                        |
| TS28Bac2797 CDS CDS    | 2.5   | 0.5   | 22.7 | R | COG1106         | Predicted ATPases                                                                                 |
| TS29Fae05427 CDS CDS   | 1.0   | 125.5 | 0.0  | R | COG1106         | Predicted ATPases                                                                                 |
| TS28Fae02052 CDS CDS   | 14.5  | 1.0   | 65.8 | R | COG1159         | GTPase                                                                                            |
| TS28Clo08749 CDS CDS   | 4.0   | 1.0   | 18.2 | R | COG1159         | GTPase                                                                                            |
| Buni2292 CDS CDS       | 4.5   | 2.0   | 10.2 | R | COG1160         | Predicted GTPases                                                                                 |
| TS29Bif4070 CDS CDS    | 0.3   | 62.5  | 0.0  | R | COG1216         | Predicted glycosyltransferases                                                                    |
| TS29Met0978 CDS CDS    | 0.3   | 12.0  | 0.1  | R | COG1234         | Metal-dependent hydrolases of the beta-lactamase superfamily III                                  |
| TS28Clo09340 CDS CDS   | 4.0   | 1.0   | 18.2 | R | COG1235         | Metal-dependent hydrolases of the beta-lactamase superfamily I                                    |
| BactD12759 CDS CDS     | 2.0   | 0.7   | 13.6 | R | COG1259         | Uncharacterized conserved protein                                                                 |
| TS29Bif0553 CDS CDS    | 0.7   | 57.2  | 0.1  | R | COG1272         | Predicted membrane protein, hemolysin III homolog                                                 |
| TS28Fae02625 CDS CDS   | 10.0  | 1.0   | 45.4 | R | COG1277         | ABC-type transport system involved in multi-copper enzyme maturation, permease component          |
| TS28Bac6489 CDS CDS    | 4.5   | 1.0   | 20.4 | R | COG1284         | Uncharacterized conserved protein                                                                 |
| Buni0374 CDS CDS       | 3.3   | 1.0   | 15.1 | R | COG1284         | Uncharacterized conserved protein                                                                 |
| TS28Fae22188 CDS CDS   | 0.3   | 16.0  | 0.1  | R | COG1284         | Uncharacterized conserved protein                                                                 |
| TS29Col1920 CDS CDS    | 0.5   | 32.0  | 0.1  | R | COG1284         | Uncharacterized conserved protein                                                                 |
| TS29Col0119 CDS CDS    | 0.5   | 34.0  | 0.1  | R | COG1284         | Uncharacterized conserved protein                                                                 |
| Msm1751321 CDS CDS     | 1.5   | 0.5   | 13.5 | R | COG1287         | Uncharacterized membrane protein, required for N-linked glycosylation                             |
| TS29Rum13350 CDS CDS   | 1.0   | 48.0  | 0.1  | R | COG1288         | Predicted membrane protein                                                                        |
| TS29Col1846 CDS CDS    | 1.0   | 50.0  | 0.1  | R | COG1288         | Predicted membrane protein                                                                        |
| CspM6210573 CDS CDS    | 1.0   | 49.8  | 0.1  | R | COG1289         | Predicted membrane protein                                                                        |
| Riae1944 CDS CDS       | 4.0   | 1.0   | 18.2 | R | COG1297         | Predicted membrane protein                                                                        |
| TS28Fae21618 CDS CDS   | 5.5   | 2.0   | 12.5 | R | COG1297         | Predicted membrane protein                                                                        |
| Robe2864 CDS CDS       | 1.5   | 0.5   | 13.6 | R | COG1302         | Uncharacterized protein conserved in bacteria                                                     |
| RintL11779 CDS CDS     | 3.0   | 1.0   | 13.6 | R | COG1302         | Uncharacterized protein conserved in bacteria                                                     |
| TS28Rum12213 CDS CDS   | 1.5   | 0.5   | 13.6 | R | COG1302         | Uncharacterized protein conserved in bacteria                                                     |
| TS28Bac2297 CDS CDS    | 2.3   | 0.3   | 31.8 | R | COG1322         | Uncharacterized protein conserved in bacteria                                                     |
| TS28Fae00267 CDS CDS   | 9.5   | 3.0   | 14.4 | R | COG1322         | Uncharacterized protein conserved in bacteria                                                     |
| Buni1811 CDS CDS       | 2.3   | 0.8   | 12.7 | R | COG1322         | Uncharacterized protein conserved in bacteria                                                     |
| Aput1312 CDS CDS       | 7.0   | 3.0   | 10.6 | R | COG1322         | Uncharacterized protein conserved in bacteria                                                     |
| TS28Fae22036 CDS CDS   | 0.3   | 38.5  | 0.0  | R | COG1322         | Uncharacterized protein conserved in bacteria                                                     |



|                                   |       |       |      |   |                 |                                                                                                                                                     |
|-----------------------------------|-------|-------|------|---|-----------------|-----------------------------------------------------------------------------------------------------------------------------------------------------|
| TS28Fae22712 CDS CDS              | 6.0   | 2.0   | 13.6 | R | COG1323         | Predicted nucleotidyltransferase                                                                                                                    |
| TS29Rum20187 CDS CDS              | 1.0   | 48.0  | 0.1  | R | COG1323         | Predicted nucleotidyltransferase                                                                                                                    |
| TS29Fae08290 CDS CDS              | 1.0   | 46.0  | 0.1  | R | COG1357         | Uncharacterized low-complexity proteins                                                                                                             |
| Bxvl3405 CDS CDS                  | 0.2   | 8.5   | 0.1  | R | COG1357         | Uncharacterized low-complexity proteins                                                                                                             |
| Bova3364 CDS CDS                  | 1.5   | 0.3   | 20.4 | R | COG1373         | Predicted ATPase (AAA+ superfamily)                                                                                                                 |
| BactD10311 CDS CDS                | 1.4   | 0.5   | 12.7 | R | COG1373         | Predicted ATPase (AAA+ superfamily)                                                                                                                 |
| BactD21418 CDS CDS                | 3.0   | 1.3   | 10.9 | R | COG1373         | Predicted ATPase (AAA+ superfamily)                                                                                                                 |
| TS28Met0533 CDS CDS               | 0.6   | 0.3   | 10.6 | R | COG1373         | Predicted ATPase (AAA+ superfamily)                                                                                                                 |
| TS29Bac10327 CDS CDS              | 0.3   | 13.0  | 0.1  | R | COG1373         | Predicted ATPase (AAA+ superfamily)                                                                                                                 |
| Bova2362 CDS CDS                  | 0.3   | 15.3  | 0.1  | R | COG1373         | Predicted ATPase (AAA+ superfamily)                                                                                                                 |
| TS29Rum19432 CDS CDS              | 1.0   | 73.0  | 0.1  | R | COG1373         | Predicted ATPase (AAA+ superfamily)                                                                                                                 |
| TS28Fae17497 CDS CDS              | 0.5   | 36.5  | 0.1  | R | COG1373         | Predicted ATPase (AAA+ superfamily)                                                                                                                 |
| TS29Bif0492 CDS CDS               | 0.4   | 38.2  | 0.0  | R | COG1373         | Predicted ATPase (AAA+ superfamily)                                                                                                                 |
| TS28Bif4446 CDS CDS               | 0.4   | 38.2  | 0.0  | R | COG1373         | Predicted ATPase (AAA+ superfamily)                                                                                                                 |
| TS29Bac09301 CDS CDS              | 0.3   | 37.0  | 0.0  | R | COG1373         | Predicted ATPase (AAA+ superfamily)                                                                                                                 |
| TS29Fae06001 CDS CDS              | 0.5   | 89.5  | 0.0  | R | COG1373         | Predicted ATPase (AAA+ superfamily)                                                                                                                 |
| Robe0623 CDS CDS                  | 131.7 | 6.0   | 99.6 | R | COG1376         | Uncharacterized protein conserved in bacteria                                                                                                       |
| TS29Rum04349 CDS CDS              | 156.7 | 29.0  | 24.5 | R | COG1376         | Uncharacterized protein conserved in bacteria                                                                                                       |
| Cbol0432 CDS CDS                  | 7.0   | 3.0   | 10.6 | R | COG1376         | Uncharacterized protein conserved in bacteria                                                                                                       |
| TS28Rum11191 CDS CDS              | 13.7  | 2.0   | 31.0 | R | COG1399         | Predicted metal-binding, possibly nucleic acid-binding protein                                                                                      |
| Cbol2666 CDS CDS                  | 5.0   | 2.0   | 11.3 | R | COG1399         | Predicted metal-binding, possibly nucleic acid-binding protein                                                                                      |
| Cbol5678 CDS CDS                  | 7.0   | 2.0   | 15.9 | R | COG1408         | Predicted phosphohydrolases                                                                                                                         |
| TS29Fae03159 CDS CDS              | 1.5   | 112.0 | 0.1  | R | COG1408         | Predicted phosphohydrolases                                                                                                                         |
| TS28Clo00068 CDS CDS              | 11.0  | 3.0   | 16.6 | R | COG1409         | Predicted phosphohydrolases                                                                                                                         |
| TS28Rum01184 CDS CDS              | 0.5   | 50.0  | 0.0  | R | COG1409         | Predicted phosphohydrolases                                                                                                                         |
| TS29Rum11482 CDS CDS              | 0.5   | 86.0  | 0.0  | R | COG1409         | Predicted phosphohydrolases                                                                                                                         |
| Bthe7331937 CDS CDS               | 7.5   | 0.5   | 67.9 | R | COG1418         | Predicted HD superfamily hydrolase                                                                                                                  |
| Aput1081 CDS CDS                  | 4.5   | 1.0   | 20.4 | R | COG1418         | Predicted HD superfamily hydrolase                                                                                                                  |
| Bfych463602 CDS phosphodiesterase | 4.2   | 1.0   | 18.9 | R | COG1418         | Predicted HD superfamily hydrolase                                                                                                                  |
| Rtor2444 CDS CDS                  | 20.3  | 5.0   | 18.5 | R | COG1418         | Predicted HD superfamily hydrolase                                                                                                                  |
| Ehal2323 CDS CDS                  | 4.0   | 1.0   | 18.2 | R | COG1418         | Predicted HD superfamily hydrolase                                                                                                                  |
| Bsp1162686 CDS CDS                | 1.9   | 0.5   | 17.2 | R | COG1418         | Predicted HD superfamily hydrolase                                                                                                                  |
| Rena1663 CDS CDS                  | 8.5   | 2.5   | 15.4 | R | COG1418         | Predicted HD superfamily hydrolase                                                                                                                  |
| Rlac1515 CDS CDS                  | 3.3   | 1.0   | 15.1 | R | COG1418         | Predicted HD superfamily hydrolase                                                                                                                  |
| TS29Rum18607 CDS CDS              | 1.5   | 0.5   | 13.6 | R | COG1418         | Predicted HD superfamily hydrolase                                                                                                                  |
| Csym2272 CDS CDS                  | 11.0  | 4.0   | 12.5 | R | COG1418         | Predicted HD superfamily hydrolase                                                                                                                  |
| TS28Fae00280 CDS CDS              | 18.5  | 7.0   | 12.0 | R | COG1418         | Predicted HD superfamily hydrolase                                                                                                                  |
| TS29Clo3530 CDS CDS               | 9.0   | 3.0   | 13.6 | R | COG1451         | Predicted metal-dependent hydrolase                                                                                                                 |
| Msmi740407 CDS CDS                | 2.5   | 0.8   | 15.1 | R | COG1460         | Uncharacterized protein conserved in archaea                                                                                                        |
| Msmi751270 CDS CDS                | 2.5   | 0.8   | 15.1 | R | COG1460         | Uncharacterized protein conserved in archaea                                                                                                        |
| TS28Met0721 CDS CDS               | 2.5   | 0.8   | 15.1 | R | COG1460         | Uncharacterized protein conserved in archaea                                                                                                        |
| Bcap1102 CDS CDS                  | 9.0   | 1.0   | 40.9 | R | COG1461         | Predicted kinase related to dihydroxyacetone kinase                                                                                                 |
| Cram1128 CDS CDS                  | 3.0   | 0.5   | 27.2 | R | COG1461         | Predicted kinase related to dihydroxyacetone kinase                                                                                                 |
| Clep2103 CDS CDS                  | 1.0   | 0.3   | 13.6 | R | COG1461         | Predicted kinase related to dihydroxyacetone kinase                                                                                                 |
| TS29RumUnc0232 CDS CDS            | 1.0   | 46.0  | 0.1  | R | COG1461 COG1307 | Predicted kinase related to dihydroxyacetone kinase Uncharacterized protein conserved in bacteria                                                   |
| TS28Fae16695 CDS CDS              | 0.3   | 18.0  | 0.1  | R | COG1461 COG1307 | Predicted kinase related to dihydroxyacetone kinase Uncharacterized protein conserved in bacteria                                                   |
| TS29Bif2512 CDS CDS               | 2.0   | 135.3 | 0.1  | R | COG1479         | Uncharacterized conserved protein                                                                                                                   |
| TS28Rum16074 CDS CDS              | 30.3  | 6.0   | 23.0 | R | COG1481         | Uncharacterized protein conserved in bacteria                                                                                                       |
| TS29Fae03943 CDS CDS              | 9.5   | 4.0   | 10.8 | R | COG1481         | Uncharacterized protein conserved in bacteria                                                                                                       |
| Clep0876 CDS CDS                  | 1.0   | 0.3   | 13.6 | R | COG1496         | Uncharacterized conserved protein                                                                                                                   |
| TS28Rum14615 CDS CDS              | 1.0   | 0.3   | 13.6 | R | COG1511         | Predicted membrane protein                                                                                                                          |
| TS29Bif1087 CDS CDS               | 1.5   | 76.0  | 0.1  | R | COG1511         | Predicted membrane protein                                                                                                                          |
| TS29Bif0655 CDS CDS               | 2.2   | 143.8 | 0.1  | R | COG1511         | Predicted membrane protein                                                                                                                          |
| TS28Bif4537 CDS CDS               | 1.0   | 107.1 | 0.0  | R | COG1511         | Predicted membrane protein                                                                                                                          |
| TS29Bif3533 CDS CDS               | 1.0   | 152.1 | 0.0  | R | COG1511         | Predicted membrane protein                                                                                                                          |
| TS28Rum13337 CDS CDS              | 22.5  | 3.0   | 34.0 | R | COG1511 COG2409 | Predicted membrane protein Predicted drug exporters of the RND superfamily                                                                          |
| TS28Clo00153 CDS CDS              | 6.0   | 0.5   | 54.5 | R | COG1546 COG1058 | Uncharacterized protein (competence- and mitomycin-induced) Predicted nucleotide-utilizing enzyme related to molybdopterin-biosynthesis enzyme MoeA |
| Clep0065 CDS CDS                  | 5.0   | 0.5   | 45.4 | R | COG1546 COG1058 | Uncharacterized protein (competence- and mitomycin-induced) Predicted nucleotide-utilizing enzyme related to molybdopterin-biosynthesis enzyme MoeA |
| TS29Bif2965 CDS CDS               | 0.3   | 72.8  | 0.0  | R | COG1559         | Predicted periplasmic solute-binding protein                                                                                                        |
| Rtor0419 CDS CDS                  | 2.5   | 1.0   | 11.3 | R | COG1561         | Uncharacterized stress-induced protein                                                                                                              |
| TS28Rum09135 CDS CDS              | 2.5   | 1.0   | 11.3 | R | COG1561         | Uncharacterized stress-induced protein                                                                                                              |
| Bum1574 CDS CDS                   | 19.5  | 4.5   | 19.7 | R | COG1579         | Zn-ribbon protein, possibly nucleic acid-binding                                                                                                    |
| TS28Rum16082 CDS CDS              | 5.5   | 0.5   | 49.9 | R | COG1606         | ATP-utilizing enzymes of the PP-loop superfamily                                                                                                    |
| TS28Rum10243 CDS CDS              | 4.0   | 1.0   | 18.2 | R | COG1606         | ATP-utilizing enzymes of the PP-loop superfamily                                                                                                    |
| TS29Bif3306 CDS CDS               | 0.8   | 97.8  | 0.0  | R | COG1615         | Uncharacterized conserved protein                                                                                                                   |
| TS28Bif4708 CDS CDS               | 0.8   | 97.8  | 0.0  | R | COG1615         | Uncharacterized conserved protein                                                                                                                   |
| TS28Fae17147 CDS CDS              | 0.3   | 28.0  | 0.1  | R | COG1649         | Uncharacterized protein conserved in bacteria                                                                                                       |
| TS28Fae06125 CDS CDS              | 4.0   | 1.0   | 18.2 | R | COG1660         | Predicted P-loop-containing kinase                                                                                                                  |
| BactD24266 CDS CDS                | 7.0   | 3.0   | 10.6 | R | COG1672         | Predicted ATPase (AAA+ superfamily)                                                                                                                 |
| RimL13113 CDS CDS                 | 4.0   | 1.0   | 18.2 | R | COG1699         | Uncharacterized protein conserved in bacteria                                                                                                       |
| Bova0527 CDS CDS                  | 4.5   | 1.0   | 20.4 | R | COG1721         | Uncharacterized conserved protein (some members contain a von Willebrand factor type A (vWA) domain)                                                |
| TS29Bac07353 CDS CDS              | 0.3   | 16.8  | 0.1  | R | COG1721         | Uncharacterized conserved protein (some members contain a von Willebrand factor type A (vWA) domain)                                                |
| TS29Bif3757 CDS CDS               | 0.3   | 39.5  | 0.0  | R | COG1739         | Uncharacterized conserved protein                                                                                                                   |
| TS28Bif0867 CDS CDS               | 0.3   | 39.5  | 0.0  | R | COG1739         | Uncharacterized conserved protein                                                                                                                   |
| Bum13473 CDS CDS                  | 3.5   | 1.5   | 10.6 | R | COG1741         | Pirin-related protein                                                                                                                               |
| BactD12109 CDS CDS                | 3.1   | 1.3   | 10.4 | R | COG1741         | Pirin-related protein                                                                                                                               |
| FpraM2121018 CDS CDS              | 17.3  | 1.5   | 52.5 | R | COG1744         | Uncharacterized ABC-type transport system, periplasmic component/surface lipoprotein                                                                |
| Bcap2813 CDS CDS                  | 7.0   | 1.0   | 31.8 | R | COG1744         | Uncharacterized ABC-type transport system, periplasmic component/surface lipoprotein                                                                |
| TS28Fae02012 CDS CDS              | 6.0   | 1.5   | 18.2 | R | COG1744         | Uncharacterized ABC-type transport system, periplasmic component/surface lipoprotein                                                                |
| TS28Clo05844 CDS CDS              | 11.0  | 3.0   | 16.6 | R | COG1744         | Uncharacterized ABC-type transport system, periplasmic component/surface lipoprotein                                                                |
| TS29Col0068 CDS CDS               | 1.0   | 67.0  | 0.1  | R | COG1744         | Uncharacterized ABC-type transport system, periplasmic component/surface lipoprotein                                                                |
| TS29RumUnc0256 CDS CDS            | 1.0   | 50.0  | 0.1  | R | COG1752 COG4667 | Predicted esterase of the alpha-beta hydrolase superfamily Predicted esterase of the alpha-beta hydrolase superfamily                               |

|                        |      |       |      |   |                 |                                                                                                                          |
|------------------------|------|-------|------|---|-----------------|--------------------------------------------------------------------------------------------------------------------------|
| Buni1876/CDS/CDS       | 4.5  | 0.5   | 40.9 | R | COG1774         | Uncharacterized homolog of PSP1                                                                                          |
| BactD12361/CDS/CDS     | 2.6  | 0.5   | 23.5 | R | COG1774         | Uncharacterized homolog of PSP1                                                                                          |
| Aput0899/CDS/CDS       | 15.0 | 4.0   | 17.0 | R | COG1774         | Uncharacterized homolog of PSP1                                                                                          |
| TS28Dor0588/CDS/CDS    | 1.5  | 0.5   | 13.6 | R | COG1774         | Uncharacterized homolog of PSP1                                                                                          |
| Dfor2707/CDS/CDS       | 2.5  | 1.0   | 11.3 | R | COG1774         | Uncharacterized homolog of PSP1                                                                                          |
| TS28Rum10394/CDS/CDS   | 5.2  | 1.5   | 15.7 | R | COG1799         | Uncharacterized protein conserved in bacteria                                                                            |
| TS28Rum12599/CDS/CDS   | 3.0  | 1.0   | 13.6 | R | COG1799         | Uncharacterized protein conserved in bacteria                                                                            |
| TS28Col1399/CDS/CDS    | 3.0  | 1.0   | 13.6 | R | COG1799         | Uncharacterized protein conserved in bacteria                                                                            |
| TS29Clo3603/CDS/CDS    | 5.0  | 2.0   | 11.3 | R | COG1799         | Uncharacterized protein conserved in bacteria                                                                            |
| Bxyl2321/CDS/CDS       | 0.2  | 10.8  | 0.1  | R | COG1808         | Predicted membrane protein                                                                                               |
| TS29Bac09534/CDS/CDS   | 0.2  | 10.8  | 0.1  | R | COG1808         | Predicted membrane protein                                                                                               |
| TS29Rum19888/CDS/CDS   | 1.0  | 45.5  | 0.1  | R | COG1811         | Uncharacterized membrane protein, possible Na <sup>+</sup> channel or pump                                               |
| Bsp1161111/CDS/CDS     | 2.5  | 1.0   | 11.3 | R | COG1814         | Uncharacterized membrane protein                                                                                         |
| Msmi750740/CDS/CDS     | 1.0  | 0.3   | 13.6 | R | COG1821         | Predicted ATP-utilizing enzyme (ATP-grasp superfamily)                                                                   |
| Rgna1052/CDS/CDS       | 2.0  | 0.5   | 18.2 | R | COG1837         | Predicted RNA-binding protein (contains KH domain)                                                                       |
| TS29Rum06889/CDS/CDS   | 2.0  | 0.5   | 18.2 | R | COG1837         | Predicted RNA-binding protein (contains KH domain)                                                                       |
| Buni3475/CDS/CDS       | 3.3  | 1.0   | 15.1 | R | COG1853         | Conserved protein/domain typically associated with flavoprotein oxygenases, DIM6/NTAB family                             |
| TS28Bac3072/CDS/CDS    | 3.3  | 1.0   | 15.1 | R | COG1853         | Conserved protein/domain typically associated with flavoprotein oxygenases, DIM6/NTAB family                             |
| BactD11706/CDS/CDS     | 3.3  | 1.0   | 15.1 | R | COG1853         | Conserved protein/domain typically associated with flavoprotein oxygenases, DIM6/NTAB family                             |
| BactD12106/CDS/CDS     | 2.0  | 0.7   | 13.6 | R | COG1853         | Conserved protein/domain typically associated with flavoprotein oxygenases, DIM6/NTAB family                             |
| TS29Bac02465/CDS/CDS   | 4.5  | 2.0   | 10.2 | R | COG1895         | Uncharacterized conserved protein related to C-terminal domain of eukaryotic chaperone, SACSIN                           |
| Bxy14080/CDS/CDS       | 4.5  | 2.0   | 10.2 | R | COG1895         | Uncharacterized conserved protein related to C-terminal domain of eukaryotic chaperone, SACSIN                           |
| Dlon1057/CDS/CDS       | 3.0  | 1.0   | 13.6 | R | COG1896         | Predicted hydrolases of HD superfamily                                                                                   |
| Msmi750736/CDS/CDS     | 2.7  | 0.3   | 36.3 | R | COG1907         | Predicted archaeal sugar kinases                                                                                         |
| TS28Met1381/CDS/CDS    | 2.7  | 0.3   | 36.3 | R | COG1907         | Predicted archaeal sugar kinases                                                                                         |
| RintL12972/CDS/CDS     | 5.0  | 2.0   | 11.3 | R | COG1917         | Uncharacterized conserved protein, contains double-stranded beta-helix domain                                            |
| TS29Rum06208/CDS/CDS   | 5.8  | 1.0   | 26.5 | R | COG2001         | Uncharacterized protein conserved in bacteria                                                                            |
| TS29Rum19264/CDS/CDS   | 36.0 | 10.0  | 16.3 | R | COG2001         | Uncharacterized protein conserved in bacteria                                                                            |
| Rtor2549/CDS/CDS       | 6.0  | 2.0   | 13.6 | R | COG2001         | Uncharacterized protein conserved in bacteria                                                                            |
| TS28Rum13912/CDS/CDS   | 0.5  | 26.5  | 0.1  | R | COG2005/COG2068 | N-terminal domain of molybdenum-binding protein/Uncharacterized MobA-related protein                                     |
| TS28Rum01566/CDS/CDS   | 3.5  | 0.5   | 31.8 | R | COG2052         | Uncharacterized protein conserved in bacteria                                                                            |
| TS28Rum01869/CDS/CDS   | 1.5  | 0.5   | 13.6 | R | COG2068         | Uncharacterized MobA-related protein                                                                                     |
| TS28Rum12482/CDS/CDS   | 4.5  | 1.5   | 13.6 | R | COG2068         | Uncharacterized MobA-related protein                                                                                     |
| TS29Clo0590/CDS/CDS    | 13.0 | 3.0   | 19.7 | R | COG2070         | Dioxygenases related to 2-nitropropane dioxygenase                                                                       |
| TS29Fae08257/CDS/CDS   | 1.0  | 62.5  | 0.1  | R | COG2081         | Predicted flavoproteins                                                                                                  |
| Rgna1119/CDS/CDS       | 4.0  | 1.0   | 18.2 | R | COG2096/COG3193 | Uncharacterized conserved protein/Uncharacterized protein, possibly involved in utilization of glycolate and propanediol |
| TS29Fae07152/CDS/CDS   | 0.5  | 42.0  | 0.1  | R | COG2110         | Predicted phosphatase homologous to the C-terminal domain of histone macroH2A1                                           |
| Msmi740349/CDS/CDS     | 1.3  | 0.5   | 11.3 | R | COG2118         | DNA-binding protein                                                                                                      |
| Msmi751328/CDS/CDS     | 1.3  | 0.5   | 11.3 | R | COG2118         | DNA-binding protein                                                                                                      |
| TS28Met1556/CDS/CDS    | 1.3  | 0.5   | 11.3 | R | COG2118         | DNA-binding protein                                                                                                      |
| TS28Met0737/CDS/CDS    | 0.8  | 0.3   | 13.6 | R | COG2129         | Predicted phosphoesterases, related to the lcc protein                                                                   |
| Msmi741001/CDS/CDS     | 0.8  | 0.3   | 13.6 | R | COG2129         | Predicted phosphoesterases, related to the lcc protein                                                                   |
| Aput1275/CDS/CDS       | 22.0 | 3.0   | 33.3 | R | COG2166         | SuFe protein probably involved in Fe-S center assembly                                                                   |
| TS28Dor1043/CDS/CDS    | 50.0 | 7.0   | 32.4 | R | COG2234         | Predicted aminopeptidases                                                                                                |
| TS29Col1806/CDS/CDS    | 1.0  | 46.0  | 0.1  | R | COG2244         | Membrane protein involved in the export of O-antigen and teichoic acid                                                   |
| TS29RumUnc1649/CDS/CDS | 1.0  | 57.0  | 0.1  | R | COG2244         | Membrane protein involved in the export of O-antigen and teichoic acid                                                   |
| TS29Fae01251/CDS/CDS   | 1.0  | 98.0  | 0.0  | R | COG2244         | Membrane protein involved in the export of O-antigen and teichoic acid                                                   |
| Robe1287/CDS/CDS       | 5.5  | 2.0   | 12.5 | R | COG2252         | Permeases                                                                                                                |
| TS29Bif1314/CDS/CDS    | 0.8  | 39.0  | 0.1  | R | COG2252         | Permeases                                                                                                                |
| TS29Fae07280/CDS/CDS   | 1.0  | 97.0  | 0.0  | R | COG2253         | Uncharacterized conserved protein                                                                                        |
| Beap1868/CDS/CDS       | 11.0 | 2.0   | 25.0 | R | COG2262         | GTPases                                                                                                                  |
| Buni1546/CDS/CDS       | 1.0  | 1.5   | 12.1 | R | COG2304         | Uncharacterized protein containing a von Willebrand factor type A (vWA) domain                                           |
| TS28Rum02146/CDS/CDS   | 4.0  | 1.0   | 18.2 | R | COG2316         | Predicted hydrolase (HD superfamily)                                                                                     |
| TS29Fae01872/CDS/CDS   | 0.5  | 25.5  | 0.1  | R | COG2323         | Predicted membrane protein                                                                                               |
| Cbol1185/CDS/CDS       | 4.3  | 1.0   | 19.7 | R | COG2326         | Uncharacterized conserved protein                                                                                        |
| TS28Rum11117/CDS/CDS   | 3.0  | 1.0   | 13.6 | R | COG2327         | Uncharacterized conserved protein                                                                                        |
| TS28Fae13829/CDS/CDS   | 1.5  | 0.5   | 13.6 | R | COG2333         | Predicted hydrolase (metallo-beta-lactamase superfamily)                                                                 |
| Buni2325/CDS/CDS       | 3.5  | 1.0   | 15.9 | R | COG2344         | AT-rich DNA-binding protein                                                                                              |
| ShigspD92361/CDS/CDS   | 17.0 | 3.0   | 25.7 | R | COG2373         | Large extracellular alpha-helical protein                                                                                |
| TS29Bac12202/CDS/CDS   | 0.3  | 20.5  | 0.1  | R | COG2425         | Uncharacterized protein containing a von Willebrand factor type A (vWA) domain                                           |
| Buni1864/CDS/CDS       | 6.0  | 0.5   | 54.5 | R | COG2509         | Uncharacterized FAD-dependent dehydrogenases                                                                             |
| TS28Fae18733/CDS/CDS   | 3.0  | 1.0   | 13.6 | R | COG2509         | Uncharacterized FAD-dependent dehydrogenases                                                                             |
| TS29Rum19250/CDS/CDS   | 6.0  | 2.0   | 13.6 | R | COG2738         | Predicted Zn-dependent protease                                                                                          |
| TS28Fae19473/CDS/CDS   | 1.0  | 62.0  | 0.1  | R | COG2819         | Predicted hydrolase of the alpha/beta superfamily                                                                        |
| TS28Col1474/CDS/CDS    | 4.0  | 1.0   | 18.2 | R | COG2848         | Uncharacterized conserved protein                                                                                        |
| Dfor1385/CDS/CDS       | 7.0  | 2.0   | 15.9 | R | COG2848         | Uncharacterized conserved protein                                                                                        |
| Dlon1087/CDS/CDS       | 3.0  | 1.0   | 13.6 | R | COG2860         | Predicted membrane protein                                                                                               |
| TS28Bif4515/CDS/CDS    | 0.5  | 49.0  | 0.0  | R | COG2898         | Uncharacterized conserved protein                                                                                        |
| TS29Bif0544/CDS/CDS    | 0.5  | 130.3 | 0.0  | R | COG2898         | Uncharacterized conserved protein                                                                                        |
| Buni0159/CDS/CDS       | 6.0  | 1.5   | 18.2 | R | COG2908         | Uncharacterized protein conserved in bacteria                                                                            |
| TS29Fae06188/CDS/CDS   | 74.0 | 21.0  | 16.0 | R | COG2929         | Uncharacterized protein conserved in bacteria                                                                            |
| TS28Dor0654/CDS/CDS    | 15.0 | 4.0   | 17.0 | R | COG2936         | Predicted acyl esterases                                                                                                 |
| Buni1112/CDS/CDS       | 1.2  | 0.5   | 10.6 | R | COG2985         | Predicted permease                                                                                                       |
| Chol3129/CDS/CDS       | 6.0  | 2.0   | 13.6 | R | COG3034         | Uncharacterized protein conserved in bacteria                                                                            |
| TS28Rum01371/CDS/CDS   | 6.5  | 1.5   | 19.7 | R | COG3044         | Predicted ATPase of the ABC class                                                                                        |
| BactD11356/CDS/CDS     | 3.0  | 1.0   | 13.6 | R | COG3093         | Plasmid maintenance system antidote protein                                                                              |
| TS29Fae02873/CDS/CDS   | 6.0  | 1.0   | 27.2 | R | COG3177         | Uncharacterized conserved protein                                                                                        |
| TS28Fae21213/CDS/CDS   | 0.5  | 23.0  | 0.1  | R | COG3177         | Uncharacterized conserved protein                                                                                        |
| TS28Bac7420/CDS/CDS    | 1.3  | 73.5  | 0.1  | R | COG3177         | Uncharacterized conserved protein                                                                                        |
| TS28Fae15478/CDS/CDS   | 3.0  | 1.0   | 13.6 | R | COG3236         | Uncharacterized protein conserved in bacteria                                                                            |
| TS29Rum20151/CDS/CDS   | 1.0  | 89.0  | 0.1  | R | COG3291         | FOG: PKD repeat                                                                                                          |
| TS29Rum14035/CDS/CDS   | 1.0  | 82.0  | 0.1  | R | COG3291/COG5263 | FOG: PKD repeat/FOG: Glucan-binding domain (YG repeat)                                                                   |
| TS28Rum09611/CDS/CDS   | 0.5  | 26.8  | 0.1  | R | COG3314         | Uncharacterized protein conserved in bacteria                                                                            |
| TS28Rum06272/CDS/CDS   | 3.0  | 1.0   | 13.6 | R | COG3341         | Predicted double-stranded RNA/RNA-DNA hybrid binding protein                                                             |

|                       |       |       |      |   |                 |                                                                                                                                     |
|-----------------------|-------|-------|------|---|-----------------|-------------------------------------------------------------------------------------------------------------------------------------|
| TS29Bac09107 CDS CDS  | 2.5   | 1.0   | 11.3 | R | COG3382         | Uncharacterized conserved protein                                                                                                   |
| Bthe7332327 CDS CDS   | 7.5   | 1.0   | 34.0 | R | COG3391         | Uncharacterized conserved protein                                                                                                   |
| Bsp1161685 CDS CDS    | 5.0   | 2.0   | 11.3 | R | COG3391         | Uncharacterized conserved protein                                                                                                   |
| Bsp1162034 CDS CDS    | 0.7   | 0.3   | 10.7 | R | COG3391         | Uncharacterized conserved protein                                                                                                   |
| Bova3767 CDS CDS      | 23.2  | 9.5   | 11.1 | R | COG3401         | Fibronectin type 3 domain-containing protein                                                                                        |
| Bxyl2994 CDS CDS      | 9.0   | 4.0   | 10.2 | R | COG3401         | Fibronectin type 3 domain-containing protein                                                                                        |
| Cbol4824 CDS CDS      | 12.0  | 3.0   | 18.2 | R | COG3412         | Uncharacterized protein conserved in bacteria                                                                                       |
| TS28Dor1343 CDS CDS   | 2.5   | 0.5   | 22.7 | R | COG3533         | Uncharacterized protein conserved in bacteria                                                                                       |
| TS29Bif3570 CDS CDS   | 3.3   | 149.6 | 0.1  | R | COG3533         | Uncharacterized protein conserved in bacteria                                                                                       |
| TS29Bac01686 CDS CDS  | 2.0   | 0.7   | 13.6 | R | COG3550         | Uncharacterized protein related to capsule biosynthesis enzymes                                                                     |
| Bega0951 CDS CDS      | 3.0   | 1.0   | 13.6 | R | COG3550         | Uncharacterized protein related to capsule biosynthesis enzymes                                                                     |
| TS29Fae02237 CDS CDS  | 0.3   | 16.0  | 0.1  | R | COG3581         | Uncharacterized protein conserved in bacteria                                                                                       |
| TS29Rum06401 CDS CDS  | 26.0  | 2.0   | 59.0 | R | COG3610         | Uncharacterized conserved protein                                                                                                   |
| Acac2873 CDS CDS      | 3.0   | 1.0   | 13.6 | R | COG3610         | Uncharacterized conserved protein                                                                                                   |
| TS29Fae09808 CDS CDS  | 0.3   | 20.0  | 0.1  | R | COG3641         | Predicted membrane protein, putative toxin regulator                                                                                |
| TS29Rum11497 CDS CDS  | 1.0   | 76.0  | 0.1  | R | COG3681         | Uncharacterized conserved protein                                                                                                   |
| Bun12020 CDS CDS      | 5.5   | 0.5   | 49.9 | R | COG3735         | Uncharacterized protein conserved in bacteria                                                                                       |
| BactD12311 CDS CDS    | 1.5   | 0.5   | 13.6 | R | COG3831         | Uncharacterized conserved protein                                                                                                   |
| TS29Bif2823 CDS CDS   | 0.3   | 14.8  | 0.1  | R | COG3856         | Uncharacterized conserved protein (small basic protein)                                                                             |
| TS28Bif1881 CDS CDS   | 0.3   | 14.8  | 0.1  | R | COG3856         | Uncharacterized conserved protein (small basic protein)                                                                             |
| TS28Dor1460 CDS CDS   | 2.5   | 1.0   | 11.3 | R | COG3858         | Predicted glycosyl hydrolase                                                                                                        |
| Cbol4820 CDS CDS      | 7.0   | 2.0   | 15.9 | R | COG3862         | Uncharacterized protein with conserved CXXC pairs                                                                                   |
| TS29Fae05330 CDS CDS  | 1.0   | 83.0  | 0.1  | R | COG3872         | Predicted metal-dependent enzyme                                                                                                    |
| TS28Eub1795 CDS CDS   | 1.5   | 0.5   | 13.6 | R | COG3875         | Uncharacterized conserved protein                                                                                                   |
| TS29Fae05457 CDS CDS  | 1.0   | 104.0 | 0.0  | R | COG3876         | Uncharacterized protein conserved in bacteria                                                                                       |
| TS29Bif2822 CDS CDS   | 0.3   | 21.3  | 0.1  | R | COG3879         | Uncharacterized protein conserved in bacteria                                                                                       |
| TS28Bif1882 CDS CDS   | 0.3   | 41.9  | 0.0  | R | COG3879         | Uncharacterized protein conserved in bacteria                                                                                       |
| TS28Eub5272 CDS CDS   | 9.0   | 4.0   | 10.2 | R | COG3880         | Uncharacterized protein with conserved CXXC pairs                                                                                   |
| TS28Rum15429 CDS CDS  | 6.0   | 0.5   | 54.5 | R | COG3894         | Uncharacterized metal-binding protein                                                                                               |
| TS29Bif0455 CDS CDS   | 1.7   | 138.0 | 0.1  | R | COG3942 COG3583 | Surface antigen Uncharacterized protein conserved in bacteria                                                                       |
| TS29Fae05982 CDS CDS  | 0.5   | 83.0  | 0.0  | R | COG3943         | Virulence protein                                                                                                                   |
| TS28Ent1nc063 CDS CDS | 9.0   | 2.0   | 20.4 | R | COG3950         | Predicted ATP-binding protein involved in virulence                                                                                 |
| TS28Bif0221 CDS CDS   | 1.0   | 69.8  | 0.1  | R | COG3956 COG1694 | Protein containing tetrapyrrole methyltransferase domain and MazG-like (predicted pyrophosphatase) domain Predicted pyrophosphatase |
| TS29Bif2938 CDS CDS   | 0.5   | 36.3  | 0.1  | R | COG3956 COG1694 | Protein containing tetrapyrrole methyltransferase domain and MazG-like (predicted pyrophosphatase) domain Predicted pyrophosphatase |
| Bxyl13199 CDS CDS     | 3.8   | 0.5   | 34.4 | R | COG3968         | Uncharacterized protein related to glutamine synthetase                                                                             |
| TS28Fae02780 CDS CDS  | 4.7   | 1.0   | 21.2 | R | COG3968         | Uncharacterized protein related to glutamine synthetase                                                                             |
| Bun10452 CDS CDS      | 5.0   | 0.5   | 45.4 | R | COG3969         | Predicted phosphoadenosine phosphosulfate sulfotransferase                                                                          |
| TS28Bif124 CDS CDS    | 0.5   | 24.7  | 0.1  | R | COG3973         | Superfamily I DNA and RNA helicases                                                                                                 |
| TS29Bif2285 CDS CDS   | 0.5   | 44.7  | 0.1  | R | COG3973         | Superfamily I DNA and RNA helicases                                                                                                 |
| Bova3115 CDS CDS      | 1.3   | 0.5   | 11.3 | R | COG3979         | Uncharacterized protein contain chitin-binding domain type 3                                                                        |
| Bxyl2958 CDS CDS      | 5.5   | 2.3   | 10.7 | R | COG3979         | Uncharacterized protein contain chitin-binding domain type 3                                                                        |
| TS29Rum00141 CDS CDS  | 297.0 | 70.0  | 19.3 | R | COG4086         | Predicted secreted protein                                                                                                          |
| TS28Rum09180 CDS CDS  | 6.3   | 1.5   | 19.2 | R | COG4086         | Predicted secreted protein                                                                                                          |
| TS29Rum03113 CDS CDS  | 14.0  | 4.0   | 15.9 | R | COG4086         | Predicted secreted protein                                                                                                          |
| BWH24168 CDS CDS      | 121.5 | 48.0  | 11.5 | R | COG4104 COG5529 | Uncharacterized conserved protein Pvocin large subunit                                                                              |
| TS28Fae22058 CDS CDS  | 7.5   | 2.0   | 17.0 | R | COG4115         | Uncharacterized protein conserved in bacteria                                                                                       |
| Bcan0708 CDS CDS      | 7.0   | 2.0   | 15.9 | R | COG4120         | ABC-type uncharacterized transport system, permease component                                                                       |
| TS29Col0062 CDS CDS   | 0.5   | 42.0  | 0.1  | R | COG4120         | ABC-type uncharacterized transport system, permease component                                                                       |
| TS28Rum03708 CDS CDS  | 4.5   | 1.0   | 20.4 | R | COG4122         | Predicted O-methyltransferase                                                                                                       |
| BactD22877 CDS CDS    | 0.9   | 0.3   | 12.5 | R | COG4122         | Predicted O-methyltransferase                                                                                                       |
| Robe1619 CDS CDS      | 5.0   | 2.0   | 11.3 | R | COG4122         | Predicted O-methyltransferase                                                                                                       |
| TS28Fae16421 CDS CDS  | 0.5   | 59.0  | 0.0  | R | COG4123         | Predicted O-methyltransferase                                                                                                       |
| Aput0331 CDS CDS      | 26.0  | 2.0   | 59.0 | R | COG4198         | Uncharacterized conserved protein                                                                                                   |
| TS29Bac07234 CDS CDS  | 5.5   | 2.0   | 12.5 | R | COG4198         | Uncharacterized conserved protein                                                                                                   |
| TS29Bac08875 CDS CDS  | 11.0  | 3.5   | 14.3 | R | COG4225         | Predicted unsaturated glucuronyl hydrolase involved in regulation of bacterial surface properties, and related proteins             |
| BactD11404 CDS CDS    | 1.0   | 0.3   | 13.6 | R | COG4225         | Predicted unsaturated glucuronyl hydrolase involved in regulation of bacterial surface properties, and related proteins             |
| Bun12555 CDS CDS      | 1.0   | 0.3   | 13.6 | R | COG4225         | Predicted unsaturated glucuronyl hydrolase involved in regulation of bacterial surface properties, and related proteins             |
| TS28Bac3674 CDS CDS   | 1.0   | 0.3   | 13.6 | R | COG4225         | Predicted unsaturated glucuronyl hydrolase involved in regulation of bacterial surface properties, and related proteins             |
| Bxyl2992 CDS CDS      | 1.4   | 0.5   | 12.7 | R | COG4225         | Predicted unsaturated glucuronyl hydrolase involved in regulation of bacterial surface properties, and related proteins             |
| TS28Rum16394 CDS CDS  | 22.5  | 2.0   | 51.1 | R | COG4260         | Putative virion core protein (lumpy skin disease virus)                                                                             |
| TS29Bac09907 CDS CDS  | 0.3   | 13.9  | 0.1  | R | COG4292         | Predicted membrane protein                                                                                                          |
| TS29Bif2400 CDS CDS   | 0.3   | 66.3  | 0.0  | R | COG4320         | Uncharacterized protein conserved in bacteria                                                                                       |
| CspS521632 CDS CDS    | 0.2   | 11.8  | 0.1  | R | COG4422         | Bacteriophage protein gp37                                                                                                          |
| TS29Fae10356 CDS CDS  | 0.5   | 31.0  | 0.1  | R | COG4474         | Uncharacterized protein conserved in bacteria                                                                                       |
| TS29Fae01471 CDS CDS  | 0.5   | 37.0  | 0.1  | R | COG4474         | Uncharacterized protein conserved in bacteria                                                                                       |
| BactD12509 CDS CDS    | 2.7   | 1.0   | 12.1 | R | COG4552         | Predicted acetyltransferase involved in intracellular survival and related acetyltransferases                                       |
| TS28Rum03210 CDS CDS  | 5.0   | 0.5   | 45.4 | R | COG4603         | ABC-type uncharacterized transport system, permease component                                                                       |
| Aput1055 CDS CDS      | 6.0   | 2.0   | 13.6 | R | COG4624         | Iron only hydrogenase large subunit, C-terminal domain                                                                              |
| TS29Bif4160 CDS CDS   | 1.9   | 96.1  | 0.1  | R | COG4716         | Myosin-crossreactive antigen                                                                                                        |
| TS28Fae21398 CDS CDS  | 0.3   | 33.0  | 0.0  | R | COG4716         | Myosin-crossreactive antigen                                                                                                        |
| TS29Rum01365 CDS CDS  | 0.5   | 24.0  | 0.1  | R | COG4717         | Uncharacterized conserved protein                                                                                                   |
| TS29Bif1298 CDS CDS   | 0.5   | 46.0  | 0.0  | R | COG4733         | Phage-related protein, tail component                                                                                               |
| Bova3587 CDS CDS      | 2.3   | 0.3   | 40.9 | R | COG4804         | Uncharacterized conserved protein                                                                                                   |
| Bthe7332279 CDS CDS   | 2.3   | 0.3   | 40.9 | R | COG4804         | Uncharacterized conserved protein                                                                                                   |
| TS29Bif3091 CDS CDS   | 0.8   | 55.5  | 0.1  | R | COG4832         | Uncharacterized conserved protein                                                                                                   |
| TS29Clo3450 CDS CDS   | 3.0   | 1.0   | 13.6 | R | COG4857         | Predicted kinase                                                                                                                    |
| TS29Rum20833 CDS CDS  | 1.0   | 96.0  | 0.0  | R | COG4878         | Uncharacterized protein conserved in bacteria                                                                                       |
| RintL14039 CDS CDS    | 3.0   | 1.0   | 13.6 | R | COG4880         | Secreted protein containing C-terminal beta-propeller domain distantly related to WD-40 repeats                                     |
| Rtor0725 CDS CDS      | 12.8  | 3.3   | 17.5 | R | COG4886         | Leucine-rich repeat (LRR) protein                                                                                                   |
| TS29Bif0656 CDS CDS   | 0.8   | 62.2  | 0.1  | R | COG4905         | Predicted membrane protein                                                                                                          |
| TS28Bif1101 CDS CDS   | 0.8   | 62.2  | 0.1  | R | COG4905         | Predicted membrane protein                                                                                                          |
| TS29Fae08550 CDS CDS  | 0.5   | 82.0  | 0.0  | R | COG4905         | Predicted membrane protein                                                                                                          |
| TS28Fae15121 CDS CDS  | 2.5   | 0.5   | 22.7 | R | COG4947         | Uncharacterized protein conserved in bacteria                                                                                       |
| TS29Fae00873 CDS CDS  | 0.5   | 31.0  | 0.1  | R | COG5015         | Uncharacterized conserved protein                                                                                                   |
| Csvm0810 CDS CDS      | 16.7  | 6.0   | 12.6 | R | COG5263         | FOG: Glucan-binding domain (YG repeat)                                                                                              |
| Cbol1236 CDS CDS      | 29.0  | 12.0  | 11.0 | R | COG5263         | FOG: Glucan-binding domain (YG repeat)                                                                                              |
| Casp5886 CDS CDS      | 1.0   | 74.0  | 0.1  | R | COG5281         | Phage-related minor tail protein                                                                                                    |

|                                |         |       |         |    |                                     |                                                                                                                                         |
|--------------------------------|---------|-------|---------|----|-------------------------------------|-----------------------------------------------------------------------------------------------------------------------------------------|
| TS29Bif4120 CDS CDS            | 1.0     | 102.8 | 0.0     | R  | COG5282                             | Uncharacterized conserved protein                                                                                                       |
| TS29Eub2074 CDS CDS            | 1.0     | 99.0  | 0.0     | R  | COG5283                             | Phage-related tail protein                                                                                                              |
| TS28Bif4969 CDS CDS            | 0.7     | 49.0  | 0.1     | R  | COG5283 COG3942 <br>COG3583 COG3584 | Phage-related tail protein Surface antigen Uncharacterized protein conserved in bacterial Uncharacterized protein conserved in bacteria |
| Bado0737 CDS CDS               | 0.3     | 32.5  | 0.0     | R  | COG5324                             | Uncharacterized conserved protein                                                                                                       |
| TS29Bif3017 CDS CDS            | 0.3     | 103.5 | 0.0     | R  | COG5324                             | Uncharacterized conserved protein                                                                                                       |
| Bxyl2623 CDS CDS               | 1.0     | 0.3   | 13.6    | R  | COG5368                             | Uncharacterized protein conserved in bacteria                                                                                           |
| Bthe7330671 CDS CDS            | 12.5    | 5.0   | 11.3    | R  | COG5464                             | Uncharacterized conserved protein                                                                                                       |
| TS29Bac07909 CDS CDS           | 4.5     | 2.0   | 10.2    | R  | COG5464                             | Uncharacterized conserved protein                                                                                                       |
| Bum0939 CDS CDS                | 3.0     | 1.0   | 13.6    | R  | COG5495                             | Uncharacterized conserved protein                                                                                                       |
| TS29Rum19562 CDS CDS           | 1.0     | 51.3  | 0.1     | R  | COG5545                             | Predicted P-loop ATPase and inactivated derivatives                                                                                     |
| TS28Clo10778 CDS CDS           | 0.3     | 15.3  | 0.1     | R  | COG5545                             | Predicted P-loop ATPase and inactivated derivatives                                                                                     |
| Rtor1345 CDS CDS               | 0.3     | 20.0  | 0.1     | R  | COG5545                             | Predicted P-loop ATPase and inactivated derivatives                                                                                     |
| Cnex2744 CDS CDS               | 1.0     | 126.9 | 0.0     | R  | COG5545                             | Predicted P-loop ATPase and inactivated derivatives                                                                                     |
| FpraM2120212 CDS CDS           | 0.3     | 38.3  | 0.0     | R  | COG5545                             | Predicted P-loop ATPase and inactivated derivatives                                                                                     |
| Rbro1714 CDS CDS               | 0.3     | 59.7  | 0.0     | R  | COG5545                             | Predicted P-loop ATPase and inactivated derivatives                                                                                     |
| Ceut1813 CDS CDS               | 0.5     | 148.2 | 0.0     | R  | COG5545                             | Predicted P-loop ATPase and inactivated derivatives                                                                                     |
| BFvch462748 CDS hypothetical   | 1.965.2 | 2.0   | 4.460.7 | NA | NA                                  | hypothetical protein                                                                                                                    |
| TS29Fae01517 CDS CDS           | 5.766.0 | 10.0  | 2.617.6 | NA | NA                                  | hypothetical protein                                                                                                                    |
| Ccom1560 CDS CDS               | 527.9   | 1.0   | 2.396.4 | NA | NA                                  | hypothetical protein                                                                                                                    |
| Cbol1796 CDS CDS               | 485.5   | 1.0   | 2.204.1 | NA | NA                                  | hypothetical protein                                                                                                                    |
| TS29Rum16879 CDS CDS           | 1.496.5 | 4.0   | 1.698.4 | NA | NA                                  | hypothetical protein                                                                                                                    |
| TS29Fae05351 CDS CDS           | 654.8   | 2.0   | 1.486.4 | NA | NA                                  | hypothetical protein                                                                                                                    |
| TS28Fae18841 CDS CDS           | 654.8   | 2.0   | 1.486.4 | NA | NA                                  | hypothetical protein                                                                                                                    |
| TS29Fae01516 CDS CDS           | 1.800.0 | 5.5   | 1.485.7 | NA | NA                                  | hypothetical protein                                                                                                                    |
| TS29Fae05352 CDS CDS           | 1.288.0 | 4.0   | 1.461.8 | NA | NA                                  | hypothetical protein                                                                                                                    |
| Bxyl0898 CDS CDS               | 91.8    | 0.3   | 1.250.7 | NA | NA                                  | hypothetical protein                                                                                                                    |
| BVL2636 CDS hypothetical       | 777.5   | 3.0   | 1.176.6 | NA | NA                                  | hypothetical protein                                                                                                                    |
| BDI0370 CDS hypothetical       | 237.0   | 1.0   | 1.075.9 | NA | NA                                  | hypothetical protein                                                                                                                    |
| TS29Fae05350 CDS CDS           | 5.133.0 | 22.0  | 1.059.2 | NA | NA                                  | hypothetical protein                                                                                                                    |
| Robe2147 CDS CDS               | 630.4   | 3.0   | 953.9   | NA | NA                                  | hypothetical protein                                                                                                                    |
| TS29Rum18029 CDS CDS           | 719.0   | 4.0   | 816.0   | NA | NA                                  | hypothetical protein                                                                                                                    |
| BFvch461128 CDS hypothetical   | 244.5   | 1.5   | 740.0   | NA | NA                                  | hypothetical protein                                                                                                                    |
| BFnctc1040 CDS hypothetical    | 244.5   | 1.5   | 740.0   | NA | NA                                  | hypothetical protein                                                                                                                    |
| TS29Fae00793 CDS CDS           | 639.0   | 4.0   | 725.2   | NA | NA                                  | hypothetical protein                                                                                                                    |
| TS29Rum18028 CDS CDS           | 605.0   | 4.0   | 686.6   | NA | NA                                  | hypothetical protein                                                                                                                    |
| BT1747 CDS pyruvate-flavodoxin | 22.0    | 0.2   | 600.0   | NA | NA                                  | hypothetical protein                                                                                                                    |
| TS28Rum04305 CDS CDS           | 128.0   | 1.0   | 581.1   | NA | NA                                  | hypothetical protein                                                                                                                    |
| TS29Fae09565 CDS CDS           | 1.283.5 | 11.0  | 529.7   | NA | NA                                  | hypothetical protein                                                                                                                    |
| TS28Rum04833 CDS CDS           | 113.0   | 1.0   | 513.0   | NA | NA                                  | hypothetical protein                                                                                                                    |
| Rtor0713 CDS CDS               | 113.0   | 1.0   | 513.0   | NA | NA                                  | hypothetical protein                                                                                                                    |
| BDI0681 CDS heat               | 450.0   | 4.0   | 510.7   | NA | NA                                  | hypothetical protein                                                                                                                    |
| TS29Fae02024 CDS CDS           | 199.3   | 2.0   | 452.5   | NA | NA                                  | hypothetical protein                                                                                                                    |
| TS28Fae12331 CDS CDS           | 195.0   | 2.0   | 442.6   | NA | NA                                  | hypothetical protein                                                                                                                    |
| TS29Fae04279 CDS CDS           | 1.586.0 | 16.5  | 436.4   | NA | NA                                  | hypothetical protein                                                                                                                    |
| TS28Rum13907 CDS CDS           | 368.3   | 4.0   | 418.0   | NA | NA                                  | hypothetical protein                                                                                                                    |
| TS29Rum16880 CDS CDS           | 368.3   | 4.0   | 418.0   | NA | NA                                  | hypothetical protein                                                                                                                    |
| BT2790 CDS phosphoenolpyruvate | 98.1    | 1.1   | 411.1   | NA | NA                                  | hypothetical protein                                                                                                                    |
| BactD21199 CDS CDS             | 90.2    | 1.0   | 409.3   | NA | NA                                  | hypothetical protein                                                                                                                    |
| Bste1270 CDS CDS               | 134.5   | 1.5   | 407.1   | NA | NA                                  | hypothetical protein                                                                                                                    |
| TS29Bac03469 CDS CDS           | 134.5   | 1.5   | 407.1   | NA | NA                                  | hypothetical protein                                                                                                                    |
| BDI1997 CDS chaperone          | 716.0   | 8.0   | 406.3   | NA | NA                                  | hypothetical protein                                                                                                                    |
| BDI2637 CDS hypothetical       | 176.0   | 2.0   | 399.5   | NA | NA                                  | hypothetical protein                                                                                                                    |
| TS28Fae13891 CDS CDS           | 86.0    | 1.0   | 390.4   | NA | NA                                  | hypothetical protein                                                                                                                    |
| Bado0002 CDS CDS               | 77.0    | 1.0   | 349.6   | NA | NA                                  | hypothetical protein                                                                                                                    |
| BFvch461742 CDS chaperone      | 37.9    | 0.5   | 344.3   | NA | NA                                  | hypothetical protein                                                                                                                    |
| BFnctc2646 CDS putative        | 74.5    | 1.0   | 338.2   | NA | NA                                  | hypothetical protein                                                                                                                    |
| Ccom0898 CDS CDS               | 71.0    | 1.0   | 322.3   | NA | NA                                  | hypothetical protein                                                                                                                    |
| Bfra31121812 CDS CDS           | 70.7    | 1.0   | 320.8   | NA | NA                                  | hypothetical protein                                                                                                                    |
| TS29Rum18027 CDS CDS           | 408.0   | 6.0   | 308.7   | NA | NA                                  | hypothetical protein                                                                                                                    |
| BDI1223 CDS endopeptidase      | 925.5   | 15.0  | 280.1   | NA | NA                                  | hypothetical protein                                                                                                                    |
| BFvch462625 CDS small          | 61.5    | 1.0   | 279.2   | NA | NA                                  | hypothetical protein                                                                                                                    |
| BFnctc2347 CDS hypothetical    | 30.0    | 0.5   | 272.4   | NA | NA                                  | hypothetical protein                                                                                                                    |
| TS28Rum01171 CDS CDS           | 30.0    | 0.5   | 272.4   | NA | NA                                  | hypothetical protein                                                                                                                    |
| BFvch462253 CDS hypothetical   | 30.0    | 0.5   | 272.4   | NA | NA                                  | hypothetical protein                                                                                                                    |
| BFnctc1172 CDS putative        | 116.9   | 2.0   | 265.4   | NA | NA                                  | hypothetical protein                                                                                                                    |
| BDI0101 CDS small              | 230.5   | 4.0   | 261.6   | NA | NA                                  | hypothetical protein                                                                                                                    |
| Rena2950 CDS CDS               | 19.0    | 0.3   | 258.8   | NA | NA                                  | hypothetical protein                                                                                                                    |
| BDI0408 CDS RNA                | 102.0   | 2.0   | 231.5   | NA | NA                                  | hypothetical protein                                                                                                                    |
| BT12704 CDS 30S                | 8.5     | 0.2   | 231.5   | NA | NA                                  | hypothetical protein                                                                                                                    |
| RintL12461 CDS CDS             | 98.0    | 2.0   | 222.4   | NA | NA                                  | hypothetical protein                                                                                                                    |
| Cbo10049 CDS CDS               | 49.0    | 1.0   | 222.4   | NA | NA                                  | hypothetical protein                                                                                                                    |
| TS29Rum00092 CDS CDS           | 146.0   | 3.0   | 220.9   | NA | NA                                  | hypothetical protein                                                                                                                    |
| RintL13107 CDS CDS             | 47.0    | 1.0   | 213.4   | NA | NA                                  | hypothetical protein                                                                                                                    |
| TS28Clo06847 CDS CDS           | 47.0    | 1.0   | 213.4   | NA | NA                                  | hypothetical protein                                                                                                                    |
| Bthe7330385 CDS CDS            | 15.3    | 0.3   | 208.3   | NA | NA                                  | hypothetical protein                                                                                                                    |
| BFnctc3222 CDS chaperonin      | 68.2    | 1.5   | 206.3   | NA | NA                                  | hypothetical protein                                                                                                                    |
| BDI0100 CDS ferritin           | 133.0   | 3.0   | 201.3   | NA | NA                                  | hypothetical protein                                                                                                                    |
| Bthe3732190 CDS CDS            | 8.4     | 0.2   | 191.2   | NA | NA                                  | hypothetical protein                                                                                                                    |
| Bple3428 CDS CDS               | 8.4     | 0.2   | 191.2   | NA | NA                                  | hypothetical protein                                                                                                                    |
| TS28Aih0161 CDS CDS            | 41.5    | 1.0   | 188.4   | NA | NA                                  | hypothetical protein                                                                                                                    |
| BFvch461225 CDS molecular      | 82.1    | 2.0   | 186.4   | NA | NA                                  | hypothetical protein                                                                                                                    |
| TS28Fae02116 CDS CDS           | 152.5   | 4.0   | 173.1   | NA | NA                                  | hypothetical protein                                                                                                                    |
| Msmi740907 CDS CDS             | 18.9    | 0.5   | 171.5   | NA | NA                                  | hypothetical protein                                                                                                                    |
| BDI2363 CDS 30S                | 37.0    | 1.0   | 168.0   | NA | NA                                  | hypothetical protein                                                                                                                    |
| BDI3786 CDS co-chaperonin      | 73.5    | 2.0   | 166.8   | NA | NA                                  | hypothetical protein                                                                                                                    |
| Msmi017 CDS metHv1-coenzyme    | 18.0    | 0.5   | 163.4   | NA | NA                                  | hypothetical protein                                                                                                                    |
| BDI0288 CDS hypothetical       | 72.0    | 2.0   | 163.4   | NA | NA                                  | hypothetical protein                                                                                                                    |
| BDI3787 CDS chaperonin         | 356.7   | 10.0  | 161.9   | NA | NA                                  | hypothetical protein                                                                                                                    |
| Dfor0627 CDS CDS               | 69.0    | 2.0   | 156.6   | NA | NA                                  | hypothetical protein                                                                                                                    |
| TS29Bac04550 CDS CDS           | 68.0    | 2.0   | 154.4   | NA | NA                                  | hypothetical protein                                                                                                                    |
| TS28Col1110 CDS CDS            | 67.0    | 2.0   | 152.1   | NA | NA                                  | hypothetical protein                                                                                                                    |
| TS28Fae18234 CDS CDS           | 83.0    | 2.5   | 150.7   | NA | NA                                  | hypothetical protein                                                                                                                    |
| BDI3677 CDS hypothetical       | 66.0    | 2.0   | 149.8   | NA | NA                                  | hypothetical protein                                                                                                                    |
| TS28Fae14056 CDS CDS           | 82.0    | 2.5   | 148.9   | NA | NA                                  | hypothetical protein                                                                                                                    |
| BFnctc1819 CDS putative        | 32.5    | 1.0   | 147.5   | NA | NA                                  | hypothetical protein                                                                                                                    |

|                                       |       |      |       |    |    |                      |
|---------------------------------------|-------|------|-------|----|----|----------------------|
| Rena2691/CDS/CDS                      | 472.8 | 15.0 | 143.1 | NA | NA | hypothetical protein |
| TS28Fae21630/CDS/CDS                  | 62.5  | 2.0  | 141.9 | NA | NA | hypothetical protein |
| BFvch464199/CDS/elongation            | 46.8  | 1.5  | 141.8 | NA | NA | hypothetical protein |
| Bova2062/CDS/CDS                      | 10.3  | 0.3  | 139.6 | NA | NA | hypothetical protein |
| Cbo12418/CDS/CDS                      | 184.5 | 6.0  | 139.6 | NA | NA | hypothetical protein |
| BDI1240/CDS/putative                  | 91.0  | 3.0  | 137.7 | NA | NA | hypothetical protein |
| BDI0076/CDS/putative                  | 30.0  | 1.0  | 136.2 | NA | NA | hypothetical protein |
| BDI3726/CDS/ribosomal                 | 30.0  | 1.0  | 136.2 | NA | NA | hypothetical protein |
| TS29Rum02298/CDS/CDS                  | 87.0  | 3.0  | 131.7 | NA | NA | hypothetical protein |
| BactD11217/CDS/CDS                    | 19.0  | 0.7  | 129.1 | NA | NA | hypothetical protein |
| BT12712/CDS/S05                       | 42.6  | 1.5  | 129.0 | NA | NA | hypothetical protein |
| TS28Rum14886/CDS/CDS                  | 14.0  | 0.5  | 127.1 | NA | NA | hypothetical protein |
| TS28Rum13616/CDS/CDS                  | 55.5  | 2.0  | 126.0 | NA | NA | hypothetical protein |
| BFvch461743/CDS/GrpE                  | 27.5  | 1.0  | 124.8 | NA | NA | hypothetical protein |
| TS29Dor0588/CDS/CDS                   | 54.7  | 2.0  | 124.1 | NA | NA | hypothetical protein |
| BactD11445/CDS/CDS                    | 13.7  | 0.5  | 124.1 | NA | NA | hypothetical protein |
| Fpram2121275/CDS/CDS                  | 27.0  | 1.0  | 122.6 | NA | NA | hypothetical protein |
| BT1920/CDS/hypothetical               | 80.0  | 3.0  | 121.1 | NA | NA | hypothetical protein |
| Bun11048/CDS/CDS                      | 8.8   | 0.3  | 120.3 | NA | NA | hypothetical protein |
| BFvch461205/CDS/endopeptidase         | 131.9 | 5.0  | 119.8 | NA | NA | hypothetical protein |
| TS29Fae08440/CDS/CDS                  | 26.2  | 1.0  | 118.8 | NA | NA | hypothetical protein |
| Msm1019/CDS/methyl-coenzyme           | 19.6  | 0.8  | 118.5 | NA | NA | hypothetical protein |
| BDI3783/CDS/hypothetical              | 26.0  | 1.0  | 118.0 | NA | NA | hypothetical protein |
| HPAG11388/CDS/hypothetical            | 26.0  | 1.0  | 118.0 | NA | NA | hypothetical protein |
| TS28Bac4910/CDS/CDS                   | 63.0  | 2.5  | 114.4 | NA | NA | hypothetical protein |
| BT3970/CDS/hypothetical               | 6.2   | 0.3  | 111.7 | NA | NA | hypothetical protein |
| Bthe3730991/CDS/CDS                   | 6.2   | 0.3  | 111.7 | NA | NA | hypothetical protein |
| Bsp1162283/CDS/CDS                    | 6.2   | 0.3  | 111.7 | NA | NA | hypothetical protein |
| Bthe7332579/CDS/CDS                   | 6.2   | 0.3  | 111.7 | NA | NA | hypothetical protein |
| TS28Fae17706/CDS/CDS                  | 24.5  | 1.0  | 111.2 | NA | NA | hypothetical protein |
| BDI3733/CDS/MotA/TolQ/ExbB            | 24.5  | 1.0  | 111.2 | NA | NA | hypothetical protein |
| TS29Rum03899/CDS/CDS                  | 49.0  | 2.0  | 111.2 | NA | NA | hypothetical protein |
| BactD11416/CDS/CDS                    | 8.1   | 0.3  | 110.1 | NA | NA | hypothetical protein |
| BT3359/CDS/lacvI                      | 16.0  | 0.7  | 109.0 | NA | NA | hypothetical protein |
| BFvch460402/CDS/hypothetical          | 24.0  | 1.0  | 109.0 | NA | NA | hypothetical protein |
| BDI3730/CDS/hypothetical              | 24.0  | 1.0  | 109.0 | NA | NA | hypothetical protein |
| BFvch462409/CDS/heat                  | 36.0  | 1.5  | 109.0 | NA | NA | hypothetical protein |
| BFncet1818/CDS/putative               | 58.9  | 2.5  | 107.0 | NA | NA | hypothetical protein |
| b3530/CDS/cellulose                   | 11.5  | 0.5  | 104.0 | NA | NA | hypothetical protein |
| Bxyl1866/CDS/CDS                      | 23.0  | 1.0  | 104.4 | NA | NA | hypothetical protein |
| BFvch464175/CDS/S05                   | 11.3  | 0.5  | 102.9 | NA | NA | hypothetical protein |
| Bun10847/CDS/CDS                      | 11.3  | 0.5  | 102.9 | NA | NA | hypothetical protein |
| BLD0741/CDS/Pyruvate                  | 5.7   | 0.3  | 102.6 | NA | NA | hypothetical protein |
| BFvch463299/CDS/fructose-bisphosphate | 7.5   | 0.3  | 102.1 | NA | NA | hypothetical protein |
| Cbo16279/CDS/CDS                      | 22.5  | 1.0  | 102.1 | NA | NA | hypothetical protein |
| Aput1086/CDS/CDS                      | 45.0  | 2.0  | 102.1 | NA | NA | hypothetical protein |
| TS29Bac01331/CDS/CDS                  | 11.2  | 0.5  | 101.4 | NA | NA | hypothetical protein |
| Bxyl1535/CDS/CDS                      | 11.2  | 0.5  | 101.4 | NA | NA | hypothetical protein |
| TS29Fae08439/CDS/CDS                  | 44.5  | 2.0  | 101.0 | NA | NA | hypothetical protein |
| TS28Fae17838/CDS/CDS                  | 22.0  | 1.0  | 99.9  | NA | NA | hypothetical protein |
| Robe0608/CDS/CDS                      | 32.5  | 1.5  | 98.4  | NA | NA | hypothetical protein |
| BFncet3483/CDS/hypothetical           | 43.0  | 2.0  | 97.6  | NA | NA | hypothetical protein |
| TS29Fae10503/CDS/CDS                  | 85.0  | 4.0  | 96.5  | NA | NA | hypothetical protein |
| BFvch463033/CDS/hypothetical          | 6.9   | 0.3  | 96.4  | NA | NA | hypothetical protein |
| TS29Rum12974/CDS/CDS                  | 7.0   | 0.3  | 95.3  | NA | NA | hypothetical protein |
| Dfor1979/CDS/CDS                      | 7.0   | 0.3  | 95.3  | NA | NA | hypothetical protein |
| Msm1018/CDS/methyl-coenzyme           | 5.3   | 0.3  | 95.3  | NA | NA | hypothetical protein |
| TS29Bac05127/CDS/CDS                  | 14.0  | 0.7  | 95.3  | NA | NA | hypothetical protein |
| BDI2620/CDS/hypothetical              | 30.5  | 1.5  | 92.3  | NA | NA | hypothetical protein |
| TS29Par397/CDS/CDS                    | 30.5  | 1.5  | 92.3  | NA | NA | hypothetical protein |
| TS28Bac4094/CDS/CDS                   | 6.7   | 0.3  | 90.8  | NA | NA | hypothetical protein |
| TS28Fae18813/CDS/CDS                  | 10.0  | 0.5  | 90.8  | NA | NA | hypothetical protein |
| BDI2362/CDS/S05                       | 10.0  | 0.5  | 90.8  | NA | NA | hypothetical protein |
| BAD0533/CDS/elongation                | 3.3   | 0.2  | 90.4  | NA | NA | hypothetical protein |
| TS28Rum07935/CDS/CDS                  | 29.5  | 1.5  | 89.3  | NA | NA | hypothetical protein |
| BFvch464171/CDS/S05                   | 9.8   | 0.5  | 88.7  | NA | NA | hypothetical protein |
| BFvch463396/CDS/co-chaperonin         | 19.1  | 1.0  | 86.9  | NA | NA | hypothetical protein |
| BFncet3223/CDS/co-chaperonin          | 19.1  | 1.0  | 86.9  | NA | NA | hypothetical protein |
| TS29Alr032/CDS/CDS                    | 19.0  | 1.0  | 86.3  | NA | NA | hypothetical protein |
| TS29Fae03670/CDS/CDS                  | 38.0  | 2.0  | 86.3  | NA | NA | hypothetical protein |
| Msm0213/CDS/histone                   | 9.5   | 0.5  | 86.3  | NA | NA | hypothetical protein |
| Bun10612/CDS/CDS                      | 19.0  | 1.0  | 86.3  | NA | NA | hypothetical protein |
| BDI0954/CDS/hypothetical              | 19.0  | 1.0  | 86.3  | NA | NA | hypothetical protein |
| TS29Bac04313/CDS/CDS                  | 132.0 | 7.0  | 85.6  | NA | NA | hypothetical protein |
| TS28Rum13670/CDS/CDS                  | 28.2  | 1.5  | 85.2  | NA | NA | hypothetical protein |
| BDI0147/CDS/hypothetical              | 56.0  | 3.0  | 84.7  | NA | NA | hypothetical protein |
| Rbro0053/CDS/CDS                      | 36.8  | 2.0  | 83.6  | NA | NA | hypothetical protein |
| BDI1241/CDS/molecular                 | 55.0  | 3.0  | 83.2  | NA | NA | hypothetical protein |
| BFvch460022/CDS/L-aspartate           | 9.0   | 0.5  | 81.7  | NA | NA | hypothetical protein |
| TS29Bac08257/CDS/CDS                  | 18.0  | 1.0  | 81.7  | NA | NA | hypothetical protein |
| BDI0941/CDS/recognition               | 18.0  | 1.0  | 81.7  | NA | NA | hypothetical protein |
| BFvch463395/CDS/chaperonin            | 80.5  | 4.5  | 81.2  | NA | NA | hypothetical protein |
| Bun10658/CDS/CDS                      | 35.8  | 2.0  | 81.2  | NA | NA | hypothetical protein |
| BDI2380/CDS/S05                       | 17.9  | 1.0  | 81.1  | NA | NA | hypothetical protein |
| TS29Clo4951/CDS/CDS                   | 122.0 | 7.0  | 79.1  | NA | NA | hypothetical protein |
| BactD11318/CDS/CDS                    | 5.7   | 0.3  | 79.1  | NA | NA | hypothetical protein |
| TS28Par0021/CDS/CDS                   | 5.7   | 0.3  | 79.1  | NA | NA | hypothetical protein |
| Bfin1131/CDS/CDS                      | 5.7   | 0.3  | 79.1  | NA | NA | hypothetical protein |
| Bste0643/CDS/CDS                      | 5.7   | 0.3  | 79.1  | NA | NA | hypothetical protein |
| Bcoproc1927/CDS/CDS                   | 5.7   | 0.3  | 79.1  | NA | NA | hypothetical protein |
| Bun12208/CDS/CDS                      | 5.7   | 0.3  | 79.1  | NA | NA | hypothetical protein |
| TS29Bif2869/CDS/CDS                   | 8.7   | 0.5  | 78.7  | NA | NA | hypothetical protein |
| TS28Bif1828/CDS/CDS                   | 8.7   | 0.5  | 78.7  | NA | NA | hypothetical protein |
| TS28Fae15050/CDS/CDS                  | 26.0  | 1.5  | 78.7  | NA | NA | hypothetical protein |
| Aput0549/CDS/CDS                      | 34.5  | 2.0  | 78.3  | NA | NA | hypothetical protein |

|                                              |       |      |      |    |    |                      |
|----------------------------------------------|-------|------|------|----|----|----------------------|
| Bxyl2861 CDS CDS                             | 8.6   | 0.5  | 77.9 | NA | NA | hypothetical protein |
| BFvch464195 CDS S0S                          | 8.6   | 0.5  | 77.8 | NA | NA | hypothetical protein |
| TS29Fae08068 CDS CDS                         | 17.0  | 1.0  | 77.2 | NA | NA | hypothetical protein |
| TS28Rum14116 CDS CDS                         | 8.5   | 0.5  | 77.2 | NA | NA | hypothetical protein |
| BDI2366 CDS S0S                              | 17.0  | 1.0  | 77.2 | NA | NA | hypothetical protein |
| TS29Bac07362 CDS CDS                         | 34.0  | 2.0  | 77.2 | NA | NA | hypothetical protein |
| BDI1603 CDS putative                         | 17.0  | 1.0  | 77.2 | NA | NA | hypothetical protein |
| TS29Rum04357 CDS CDS                         | 17.0  | 1.0  | 77.2 | NA | NA | hypothetical protein |
| b2678 CDS glycine                            | 16.8  | 1.0  | 76.4 | NA | NA | hypothetical protein |
| FprM2121587 CDS CDS                          | 33.5  | 2.0  | 76.0 | NA | NA | hypothetical protein |
| TS29Rum00547 CDS CDS                         | 448.0 | 27.0 | 75.3 | NA | NA | hypothetical protein |
| Cbol1700 CDS CDS                             | 33.0  | 2.0  | 74.9 | NA | NA | hypothetical protein |
| BFvch464196 CDS S0S                          | 8.2   | 0.5  | 74.9 | NA | NA | hypothetical protein |
| BFncic4019 CDS S0S                           | 8.2   | 0.5  | 74.9 | NA | NA | hypothetical protein |
| TS28Fae10754 CDS CDS                         | 41.2  | 2.5  | 74.8 | NA | NA | hypothetical protein |
| TS29Fae09687 CDS CDS                         | 41.2  | 2.5  | 74.8 | NA | NA | hypothetical protein |
| TS29Fae10194 CDS CDS                         | 5.4   | 0.3  | 73.8 | NA | NA | hypothetical protein |
| Bxyl0984 CDS CDS                             | 8.1   | 0.5  | 73.5 | NA | NA | hypothetical protein |
| BDI1709 CDS S0S                              | 16.0  | 1.0  | 72.6 | NA | NA | hypothetical protein |
| BDI0598 CDS putative                         | 48.0  | 3.0  | 72.6 | NA | NA | hypothetical protein |
| BDI3791 CDS hypothetical                     | 16.0  | 1.0  | 72.6 | NA | NA | hypothetical protein |
| TS29Par109 CDS CDS                           | 8.0   | 0.5  | 72.6 | NA | NA | hypothetical protein |
| BFncic2491 CDS heat                          | 40.0  | 2.5  | 72.6 | NA | NA | hypothetical protein |
| FprM2120928 CDS CDS                          | 8.0   | 0.5  | 72.6 | NA | NA | hypothetical protein |
| BDI1838 CDS UDP-bacillosamine                | 32.0  | 2.0  | 72.6 | NA | NA | hypothetical protein |
| BT2711 CDS S0S                               | 23.8  | 1.5  | 72.1 | NA | NA | hypothetical protein |
| Bxyl1094 CDS CDS                             | 5.3   | 0.3  | 71.5 | NA | NA | hypothetical protein |
| BDI0359 CDS serine                           | 78.5  | 5.0  | 71.3 | NA | NA | hypothetical protein |
| Dfor0045 CDS CDS                             | 47.0  | 3.0  | 71.1 | NA | NA | hypothetical protein |
| BFvch462744 CDS serine                       | 15.5  | 1.0  | 70.4 | NA | NA | hypothetical protein |
| BFvch461892 CDS pvrivate                     | 7.7   | 0.5  | 69.6 | NA | NA | hypothetical protein |
| BDI2377 CDS S0S                              | 15.3  | 1.0  | 69.6 | NA | NA | hypothetical protein |
| BLD1839 CDS 1,3-propanediol                  | 7.7   | 0.5  | 69.5 | NA | NA | hypothetical protein |
| TS28Dor0215 CDS CDS                          | 15.1  | 1.0  | 68.4 | NA | NA | hypothetical protein |
| TS28Bac1553 CDS CDS                          | 5.0   | 0.3  | 68.1 | NA | NA | hypothetical protein |
| Bxyl1121 CDS CDS                             | 5.0   | 0.3  | 68.1 | NA | NA | hypothetical protein |
| HPAG10370 CDS high                           | 15.0  | 1.0  | 68.1 | NA | NA | hypothetical protein |
| TS29Par418 CDS CDS                           | 15.0  | 1.0  | 68.1 | NA | NA | hypothetical protein |
| BDI2375 CDS S0S                              | 30.0  | 2.0  | 68.1 | NA | NA | hypothetical protein |
| Robe1420 CDS CDS                             | 7.5   | 0.5  | 68.1 | NA | NA | hypothetical protein |
| TS29Rum15481 CDS CDS                         | 15.0  | 1.0  | 68.1 | NA | NA | hypothetical protein |
| TS29Fae10144 CDS CDS                         | 22.5  | 1.5  | 68.1 | NA | NA | hypothetical protein |
| Bado0652 CDS CDS                             | 2.5   | 0.2  | 67.7 | NA | NA | hypothetical protein |
| Buni2830 CDS CDS                             | 14.8  | 1.0  | 67.3 | NA | NA | hypothetical protein |
| TS28Bac0307 CDS CDS                          | 9.8   | 0.7  | 67.0 | NA | NA | hypothetical protein |
| TS28Fae02028 CDS CDS                         | 14.5  | 1.0  | 65.8 | NA | NA | hypothetical protein |
| Bxyl3701 CDS CDS                             | 14.3  | 1.0  | 65.1 | NA | NA | hypothetical protein |
| BactD10742 CDS CDS                           | 23.8  | 1.7  | 64.9 | NA | NA | hypothetical protein |
| BDI0287 CDS glyceraldehyde                   | 14.2  | 1.0  | 64.5 | NA | NA | hypothetical protein |
| TS29Rum11835 CDS CDS                         | 28.3  | 2.0  | 64.3 | NA | NA | hypothetical protein |
| BactD14466 CDS CDS                           | 11.8  | 0.8  | 64.2 | NA | NA | hypothetical protein |
| Bxyl1667 CDS CDS                             | 11.8  | 0.8  | 64.2 | NA | NA | hypothetical protein |
| BDI1893 CDS hypothetical                     | 14.0  | 1.0  | 63.6 | NA | NA | hypothetical protein |
| BDI2434 CDS GTP-binding                      | 7.0   | 0.5  | 63.6 | NA | NA | hypothetical protein |
| TS28Fae12272 CDS CDS                         | 14.0  | 1.0  | 63.6 | NA | NA | hypothetical protein |
| Bfin3068 CDS CDS                             | 14.0  | 1.0  | 63.6 | NA | NA | hypothetical protein |
| BDI2436 CDS 3-oxoacyl-[acyl-carrier-protein] | 14.0  | 1.0  | 63.6 | NA | NA | hypothetical protein |
| Dfor0628 CDS CDS                             | 14.0  | 1.0  | 63.6 | NA | NA | hypothetical protein |
| ELUBREC1884 CDS hypothetical                 | 7.0   | 0.5  | 63.6 | NA | NA | hypothetical protein |
| BDI3701 CDS cationic                         | 7.0   | 0.5  | 63.6 | NA | NA | hypothetical protein |
| TS28Bif4358 CDS CDS                          | 14.0  | 1.0  | 63.6 | NA | NA | hypothetical protein |
| BDI1089 CDS negative                         | 83.0  | 6.0  | 62.8 | NA | NA | hypothetical protein |
| Bxyl1462 CDS CDS                             | 34.4  | 2.5  | 62.4 | NA | NA | hypothetical protein |
| TS29Bac03595 CDS CDS                         | 34.4  | 2.5  | 62.4 | NA | NA | hypothetical protein |
| Aput1491 CDS CDS                             | 41.0  | 3.0  | 62.0 | NA | NA | hypothetical protein |
| Bbre0206 CDS CDS                             | 4.7   | 0.3  | 61.8 | NA | NA | hypothetical protein |
| BFncic3993 CDS S0S                           | 6.8   | 0.5  | 61.5 | NA | NA | hypothetical protein |
| TS29Rum04456 CDS CDS                         | 4.5   | 0.3  | 61.3 | NA | NA | hypothetical protein |
| BFncic0198 CDS putative                      | 13.5  | 1.0  | 61.3 | NA | NA | hypothetical protein |
| BFvch460241 CDS RNA                          | 13.5  | 1.0  | 61.3 | NA | NA | hypothetical protein |
| TS28Rum13782 CDS CDS                         | 13.5  | 1.0  | 61.3 | NA | NA | hypothetical protein |
| Cbol4929 CDS CDS                             | 26.3  | 2.0  | 59.8 | NA | NA | hypothetical protein |
| Cbol6475 CDS CDS                             | 26.3  | 2.0  | 59.8 | NA | NA | hypothetical protein |
| TS29Rum04358 CDS CDS                         | 52.5  | 4.0  | 59.6 | NA | NA | hypothetical protein |
| BactD13935 CDS CDS                           | 39.3  | 3.0  | 59.5 | NA | NA | hypothetical protein |
| Bxyl2795 CDS CDS                             | 6.6   | 0.5  | 59.5 | NA | NA | hypothetical protein |
| b3593 CDS rfsA                               | 6.5   | 0.5  | 59.0 | NA | NA | hypothetical protein |
| BFvch464493 CDS hypothetical                 | 4.3   | 0.3  | 59.0 | NA | NA | hypothetical protein |
| BFvch460111 CDS hypothetical                 | 3.3   | 0.3  | 59.0 | NA | NA | hypothetical protein |
| Bsp1161733 CDS CDS                           | 6.5   | 0.5  | 59.0 | NA | NA | hypothetical protein |
| b0507 CDS glyoxylate                         | 6.5   | 0.5  | 59.0 | NA | NA | hypothetical protein |
| BDI2693 CDS GTP                              | 13.0  | 1.0  | 59.0 | NA | NA | hypothetical protein |
| b2660 CDS predicted                          | 6.5   | 0.5  | 59.0 | NA | NA | hypothetical protein |
| TS29Bac01746 CDS CDS                         | 3.3   | 0.3  | 59.0 | NA | NA | hypothetical protein |
| TS28Fae10699 CDS CDS                         | 6.5   | 0.5  | 59.0 | NA | NA | hypothetical protein |
| Bint0735 CDS CDS                             | 3.3   | 0.3  | 59.0 | NA | NA | hypothetical protein |
| TS29Dor1172 CDS CDS                          | 13.0  | 1.0  | 59.0 | NA | NA | hypothetical protein |
| BDI3397 CDS alkyl                            | 13.0  | 1.0  | 59.0 | NA | NA | hypothetical protein |
| HPAG11496 CDS leucyl-tRNA                    | 13.0  | 1.0  | 59.0 | NA | NA | hypothetical protein |
| BDI3461 CDS putative                         | 13.0  | 1.0  | 59.0 | NA | NA | hypothetical protein |
| BFncic1189 CDS molecular                     | 90.1  | 7.0  | 58.4 | NA | NA | hypothetical protein |
| Bxyl1100 CDS CDS                             | 21.3  | 1.7  | 57.9 | NA | NA | hypothetical protein |
| FprM2120511 CDS CDS                          | 6.4   | 0.5  | 57.8 | NA | NA | hypothetical protein |
| BFvch461659 CDS hypothetical                 | 6.3   | 0.5  | 57.5 | NA | NA | hypothetical protein |
| BFncic1667 CDS hypothetical                  | 6.3   | 0.5  | 57.5 | NA | NA | hypothetical protein |

|                                              |       |      |      |    |    |                      |
|----------------------------------------------|-------|------|------|----|----|----------------------|
| Bxyl0982 CDS CDS                             | 3.2   | 0.3  | 57.2 | NA | NA | hypothetical protein |
| TS29Par701 CDS CDS                           | 12.5  | 1.0  | 56.7 | NA | NA | hypothetical protein |
| BDI2369 CDS 50S                              | 25.0  | 2.0  | 56.7 | NA | NA | hypothetical protein |
| TS29Par548 CDS CDS                           | 12.5  | 1.0  | 56.7 | NA | NA | hypothetical protein |
| TS28Rum14109 CDS CDS                         | 49.5  | 4.0  | 56.2 | NA | NA | hypothetical protein |
| b4034 CDS maltose                            | 18.5  | 1.5  | 56.0 | NA | NA | hypothetical protein |
| TS28Rum00324 CDS CDS                         | 18.5  | 1.5  | 56.0 | NA | NA | hypothetical protein |
| TS29Fae01328 CDS CDS                         | 24.5  | 2.0  | 55.6 | NA | NA | hypothetical protein |
| BDI0722 CDS hypothetical                     | 49.0  | 4.0  | 55.6 | NA | NA | hypothetical protein |
| TS28Bac1461 CDS CDS                          | 40.7  | 3.3  | 55.4 | NA | NA | hypothetical protein |
| TS28Bac3848 CDS CDS                          | 22.2  | 1.8  | 55.0 | NA | NA | hypothetical protein |
| TS28Clo8157 CDS CDS                          | 12.0  | 1.0  | 54.5 | NA | NA | hypothetical protein |
| BDI1447 CDS hypothetical                     | 12.0  | 1.0  | 54.5 | NA | NA | hypothetical protein |
| BFnctc3579 CDS hypothetical                  | 6.0   | 0.5  | 54.5 | NA | NA | hypothetical protein |
| TS29Fae09217 CDS CDS                         | 12.0  | 1.0  | 54.5 | NA | NA | hypothetical protein |
| TS28Fae22740 CDS CDS                         | 6.0   | 0.5  | 54.5 | NA | NA | hypothetical protein |
| Aput0055 CDS CDS                             | 24.0  | 2.0  | 54.5 | NA | NA | hypothetical protein |
| BDI0537 CDS two-component                    | 12.0  | 1.0  | 54.5 | NA | NA | hypothetical protein |
| BFvch464509 CDS putative                     | 6.0   | 0.5  | 54.5 | NA | NA | hypothetical protein |
| Bum1203 CDS CDS                              | 6.0   | 0.5  | 54.5 | NA | NA | hypothetical protein |
| b4277 CDS KpLE2                              | 12.0  | 1.0  | 54.5 | NA | NA | hypothetical protein |
| Cbo14140 CDS CDS                             | 12.0  | 1.0  | 54.5 | NA | NA | hypothetical protein |
| BDI0386 CDS integrase                        | 12.0  | 1.0  | 54.5 | NA | NA | hypothetical protein |
| TS29Rum13499 CDS CDS                         | 24.0  | 2.0  | 54.5 | NA | NA | hypothetical protein |
| TS29Rum20937 CDS CDS                         | 12.0  | 1.0  | 54.5 | NA | NA | hypothetical protein |
| TS28Fae22761 CDS CDS                         | 24.0  | 2.0  | 54.5 | NA | NA | hypothetical protein |
| BFnctc2551 CDS putative                      | 6.0   | 0.5  | 54.5 | NA | NA | hypothetical protein |
| TS28Rum12480 CDS CDS                         | 6.0   | 0.5  | 54.5 | NA | NA | hypothetical protein |
| BFnctc4303 CDS putative                      | 6.0   | 0.5  | 54.5 | NA | NA | hypothetical protein |
| BFnctc1691 CDS peptide                       | 6.0   | 0.5  | 54.5 | NA | NA | hypothetical protein |
| TS28Aih0765 CDS CDS                          | 12.0  | 1.0  | 54.5 | NA | NA | hypothetical protein |
| Aput1485 CDS CDS                             | 12.0  | 1.0  | 54.5 | NA | NA | hypothetical protein |
| Bsp1163738 CDS CDS                           | 11.9  | 1.0  | 54.1 | NA | NA | hypothetical protein |
| TS28Met0541 CDS CDS                          | 9.9   | 0.8  | 53.8 | NA | NA | hypothetical protein |
| Msm1750779 CDS CDS                           | 9.9   | 0.8  | 53.8 | NA | NA | hypothetical protein |
| BactD13599 CDS CDS                           | 11.9  | 1.0  | 53.8 | NA | NA | hypothetical protein |
| BFvch464201 CDS tyrosine                     | 5.8   | 0.5  | 53.0 | NA | NA | hypothetical protein |
| BDI3706 CDS hypothetical                     | 35.0  | 3.0  | 53.0 | NA | NA | hypothetical protein |
| Bxyl1827 CDS CDS                             | 5.8   | 0.5  | 52.8 | NA | NA | hypothetical protein |
| TS28Fae08084 CDS CDS                         | 23.2  | 2.0  | 52.7 | NA | NA | hypothetical protein |
| BFnctc3997 CDS 30S                           | 17.3  | 1.5  | 52.5 | NA | NA | hypothetical protein |
| TS28Fae07399 CDS CDS                         | 11.5  | 1.0  | 52.2 | NA | NA | hypothetical protein |
| Aput1695 CDS CDS                             | 11.5  | 1.0  | 52.2 | NA | NA | hypothetical protein |
| BFvch463377 CDS putative                     | 11.5  | 1.0  | 52.2 | NA | NA | hypothetical protein |
| BDI2383 CDS 30S                              | 34.5  | 3.0  | 52.2 | NA | NA | hypothetical protein |
| BFnctc1661 CDS putative                      | 11.5  | 1.0  | 52.2 | NA | NA | hypothetical protein |
| BactD13115 CDS CDS                           | 5.7   | 0.5  | 52.1 | NA | NA | hypothetical protein |
| Bxyl1368 CDS CDS                             | 5.7   | 0.5  | 52.1 | NA | NA | hypothetical protein |
| TS28Fae22762 CDS CDS                         | 68.0  | 6.0  | 51.5 | NA | NA | hypothetical protein |
| Ldb2187 CDS hypothetical                     | 11.3  | 1.0  | 51.1 | NA | NA | hypothetical protein |
| Beac0639 CDS CDS                             | 11.2  | 1.0  | 50.8 | NA | NA | hypothetical protein |
| BDI2464 CDS hypothetical                     | 67.0  | 6.0  | 50.7 | NA | NA | hypothetical protein |
| TS28Bac0462 CDS CDS                          | 7.4   | 0.7  | 50.5 | NA | NA | hypothetical protein |
| Bum0964 CDS CDS                              | 3.7   | 0.3  | 49.9 | NA | NA | hypothetical protein |
| Bthe7335684 CDS CDS                          | 3.7   | 0.3  | 49.9 | NA | NA | hypothetical protein |
| TS28Bac5501 CDS CDS                          | 3.7   | 0.3  | 49.9 | NA | NA | hypothetical protein |
| TS28Bac2302 CDS CDS                          | 3.7   | 0.3  | 49.9 | NA | NA | hypothetical protein |
| b3482 CDS rbsB                               | 5.5   | 0.5  | 49.9 | NA | NA | hypothetical protein |
| b3071 CDS predicted                          | 11.0  | 1.0  | 49.9 | NA | NA | hypothetical protein |
| TS28Fae16863 CDS CDS                         | 11.0  | 1.0  | 49.9 | NA | NA | hypothetical protein |
| BDI0097 CDS glycine                          | 11.0  | 1.0  | 49.9 | NA | NA | hypothetical protein |
| Bxyl1605 CDS CDS                             | 5.5   | 0.5  | 49.9 | NA | NA | hypothetical protein |
| Simf0611 CDS CDS                             | 11.0  | 1.0  | 49.9 | NA | NA | hypothetical protein |
| TS28Bif5274 CDS CDS                          | 11.0  | 1.0  | 49.9 | NA | NA | hypothetical protein |
| TS29Fae02222 CDS CDS                         | 11.0  | 1.0  | 49.9 | NA | NA | hypothetical protein |
| Bbre0642 CDS CDS                             | 2.2   | 0.2  | 49.9 | NA | NA | hypothetical protein |
| Msm0623 CDS 50S                              | 2.2   | 0.2  | 49.9 | NA | NA | hypothetical protein |
| TS29Clo2082 CDS CDS                          | 11.0  | 1.0  | 49.9 | NA | NA | hypothetical protein |
| BFvch464017 CDS ribosomal                    | 5.5   | 0.5  | 49.9 | NA | NA | hypothetical protein |
| TS28Fae01757 CDS CDS                         | 5.5   | 0.5  | 49.9 | NA | NA | hypothetical protein |
| Aput0614 CDS CDS                             | 88.0  | 8.0  | 49.9 | NA | NA | hypothetical protein |
| TS28Rum03178 CDS CDS                         | 5.5   | 0.5  | 49.9 | NA | NA | hypothetical protein |
| TS29Rum12358 CDS CDS                         | 11.0  | 1.0  | 49.9 | NA | NA | hypothetical protein |
| Caer1715 CDS CDS                             | 5.5   | 0.5  | 49.9 | NA | NA | hypothetical protein |
| TS29Fae06303 CDS CDS                         | 131.0 | 12.0 | 49.6 | NA | NA | hypothetical protein |
| TS29Bac02016 CDS CDS                         | 43.5  | 4.0  | 49.4 | NA | NA | hypothetical protein |
| BFnctc4280 CDS hypothetical                  | 10.9  | 1.0  | 49.3 | NA | NA | hypothetical protein |
| TS29Bac09424 CDS CDS                         | 54.3  | 5.0  | 49.3 | NA | NA | hypothetical protein |
| BDI1698 CDS hypothetical                     | 76.0  | 7.0  | 49.3 | NA | NA | hypothetical protein |
| Msm0542 CDS methylenetetrahydromethanopterin | 10.8  | 1.0  | 49.2 | NA | NA | hypothetical protein |
| BT4453 CDS 6-pyruvoyl-tetrahydropterin       | 10.8  | 1.0  | 49.2 | NA | NA | hypothetical protein |
| BT2629 CDS putative                          | 9.0   | 0.8  | 48.9 | NA | NA | hypothetical protein |
| TS28Rum14325 CDS CDS                         | 21.5  | 2.0  | 48.8 | NA | NA | hypothetical protein |
| Bova2295 CDS CDS                             | 10.7  | 1.0  | 48.4 | NA | NA | hypothetical protein |
| TS28Fae18997 CDS CDS                         | 32.0  | 3.0  | 48.4 | NA | NA | hypothetical protein |
| TS28Fae17789 CDS CDS                         | 63.8  | 6.0  | 48.3 | NA | NA | hypothetical protein |
| BDI3380 CDS hypothetical                     | 42.5  | 4.0  | 48.2 | NA | NA | hypothetical protein |
| TS28Fae07504 CDS CDS                         | 42.5  | 4.0  | 48.2 | NA | NA | hypothetical protein |
| Robe1900 CDS CDS                             | 10.5  | 1.0  | 47.7 | NA | NA | hypothetical protein |
| TS29Dor1173 CDS CDS                          | 21.0  | 2.0  | 47.7 | NA | NA | hypothetical protein |
| TS29Rum14639 CDS CDS                         | 21.0  | 2.0  | 47.7 | NA | NA | hypothetical protein |
| BDI0237 CDS N-acetylglucosamine-6-phosphate  | 21.0  | 2.0  | 47.7 | NA | NA | hypothetical protein |
| Bthe7333178 CDS CDS                          | 10.5  | 1.0  | 47.7 | NA | NA | hypothetical protein |

|                             |      |     |      |    |    |                      |
|-----------------------------|------|-----|------|----|----|----------------------|
| FpraM2121475/CDS/CDS        | 5.3  | 0.5 | 47.7 | NA | NA | hypothetical protein |
| BWH23807/CDS/CDS            | 29.8 | 2.0 | 47.3 | NA | NA | hypothetical protein |
| TS28Fae10232/CDS/CDS        | 3.4  | 0.3 | 46.7 | NA | NA | hypothetical protein |
| Msm0884/CDS/adhesin-like    | 8.6  | 0.8 | 46.6 | NA | NA | hypothetical protein |
| TS29Rum11874/CDS/CDS        | 86.0 | 8.5 | 45.9 | NA | NA | hypothetical protein |
| TS28Fae03126/CDS/CDS        | 10.1 | 1.0 | 45.9 | NA | NA | hypothetical protein |
| BactD10370/CDS/CDS          | 10.0 | 1.0 | 45.4 | NA | NA | hypothetical protein |
| b4058/CDS/ATPase            | 5.0  | 0.5 | 45.4 | NA | NA | hypothetical protein |
| BDI3462/CDS/hypothetical    | 40.0 | 4.0 | 45.4 | NA | NA | hypothetical protein |
| BDI0725/CDS/hypothetical    | 10.0 | 1.0 | 45.4 | NA | NA | hypothetical protein |
| TS29Col1522/CDS/CDS         | 10.0 | 1.0 | 45.4 | NA | NA | hypothetical protein |
| b4230/CDS/predicted         | 10.0 | 1.0 | 45.4 | NA | NA | hypothetical protein |
| BFvch462178/CDS/IF0F1       | 5.0  | 0.5 | 45.4 | NA | NA | hypothetical protein |
| Bfin0259/CDS/CDS            | 10.0 | 1.0 | 45.4 | NA | NA | hypothetical protein |
| Aput0986/CDS/CDS            | 20.0 | 2.0 | 45.4 | NA | NA | hypothetical protein |
| TS28Rum09032/CDS/CDS        | 10.0 | 1.0 | 45.4 | NA | NA | hypothetical protein |
| TS28Fae13469/CDS/CDS        | 10.0 | 1.0 | 45.4 | NA | NA | hypothetical protein |
| BFnctc3199/CDS/hypothetical | 10.0 | 1.0 | 45.4 | NA | NA | hypothetical protein |
| Rtor0640/CDS/CDS            | 20.0 | 2.0 | 45.4 | NA | NA | hypothetical protein |
| BFvch463755/CDS/aconitate   | 5.0  | 0.5 | 45.4 | NA | NA | hypothetical protein |
| b4059/CDS/single-stranded   | 10.0 | 1.0 | 45.4 | NA | NA | hypothetical protein |



|                                      |       |      |      |    |    |                      |
|--------------------------------------|-------|------|------|----|----|----------------------|
| BDI3400 CDS sugar                    | 20.0  | 2.0  | 45.4 | NA | NA | hypothetical protein |
| BDI0692 CDS 50S                      | 10.0  | 1.0  | 45.4 | NA | NA | hypothetical protein |
| TS29Dor1445 CDS CDS                  | 20.0  | 2.0  | 45.4 | NA | NA | hypothetical protein |
| RintL13117 CDS CDS                   | 10.0  | 1.0  | 45.4 | NA | NA | hypothetical protein |
| BunI0230 CDS CDS                     | 5.0   | 0.5  | 45.4 | NA | NA | hypothetical protein |
| BDI0935 CDS putative                 | 10.0  | 1.0  | 45.4 | NA | NA | hypothetical protein |
| TS28Fae12041 CDS CDS                 | 5.0   | 0.5  | 45.4 | NA | NA | hypothetical protein |
| M23Apeg1149 CDS Glycerol-3-phosphate | 10.0  | 1.0  | 45.4 | NA | NA | hypothetical protein |
| BFncet1299 CDS putative              | 5.0   | 0.5  | 45.4 | NA | NA | hypothetical protein |
| BDI0353 CDS putative                 | 30.0  | 3.0  | 45.4 | NA | NA | hypothetical protein |
| Aput1548 CDS CDS                     | 30.0  | 3.0  | 45.4 | NA | NA | hypothetical protein |
| TS29Fae07012 CDS CDS                 | 84.0  | 8.5  | 44.9 | NA | NA | hypothetical protein |
| Robe0624 CDS CDS                     | 93.3  | 9.5  | 44.6 | NA | NA | hypothetical protein |
| TS28Fae22763 CDS CDS                 | 29.3  | 3.0  | 44.4 | NA | NA | hypothetical protein |
| TS28Fae08675 CDS CDS                 | 34.2  | 3.5  | 44.3 | NA | NA | hypothetical protein |
| b4065 CDS predicted                  | 9.7   | 1.0  | 43.9 | NA | NA | hypothetical protein |
| TS29Bac03137 CDS CDS                 | 29.0  | 3.0  | 43.9 | NA | NA | hypothetical protein |
| BDI1874 CDS ATP-dependent            | 67.5  | 7.0  | 43.8 | NA | NA | hypothetical protein |
| Aput1547 CDS CDS                     | 77.0  | 8.0  | 43.7 | NA | NA | hypothetical protein |
| BactD13776 CDS CDS                   | 9.5   | 1.0  | 43.3 | NA | NA | hypothetical protein |
| BunI2847 CDS CDS                     | 23.8  | 2.5  | 43.3 | NA | NA | hypothetical protein |
| BDI1933 CDS putative                 | 19.0  | 2.0  | 43.1 | NA | NA | hypothetical protein |
| BLD0100 CDS Cystathionine            | 4.8   | 0.5  | 43.1 | NA | NA | hypothetical protein |
| Aput0034 CDS CDS                     | 19.0  | 2.0  | 43.1 | NA | NA | hypothetical protein |
| TS28Clo00072 CDS CDS                 | 19.0  | 2.0  | 43.1 | NA | NA | hypothetical protein |
| TS29Fae05353 CDS CDS                 | 323.0 | 34.0 | 43.1 | NA | NA | hypothetical protein |
| TS28Eub5220 CDS CDS                  | 3.2   | 0.3  | 43.1 | NA | NA | hypothetical protein |
| BFvch464167 CDS 30S                  | 4.7   | 0.5  | 42.9 | NA | NA | hypothetical protein |
| Bega0846 CDS CDS                     | 3.1   | 0.3  | 42.8 | NA | NA | hypothetical protein |
| Bxyl1213 CDS CDS                     | 3.1   | 0.3  | 42.8 | NA | NA | hypothetical protein |
| Bthe7332532 CDS CDS                  | 3.1   | 0.3  | 42.8 | NA | NA | hypothetical protein |
| Bthe3733902 CDS CDS                  | 3.1   | 0.3  | 42.8 | NA | NA | hypothetical protein |
| BT2731 CDS 30S                       | 37.4  | 4.0  | 42.5 | NA | NA | hypothetical protein |
| TS28Rum10552 CDS CDS                 | 4.7   | 0.5  | 42.4 | NA | NA | hypothetical protein |
| BDI0580 CDS earbamyl                 | 28.0  | 3.0  | 42.4 | NA | NA | hypothetical protein |
| TS29Dor1174 CDS CDS                  | 56.0  | 6.0  | 42.4 | NA | NA | hypothetical protein |
| BDI2272 CDS elongation               | 46.5  | 5.0  | 42.2 | NA | NA | hypothetical protein |
| TS29Col1331 CDS CDS                  | 130.0 | 14.0 | 42.2 | NA | NA | hypothetical protein |
| BunI0627 CDS CDS                     | 9.3   | 1.0  | 42.0 | NA | NA | hypothetical protein |
| BDI0385 CDS hypothetical             | 37.0  | 4.0  | 42.0 | NA | NA | hypothetical protein |
| BDI1697 CDS hypothetical             | 37.0  | 4.0  | 42.0 | NA | NA | hypothetical protein |
| TS28Clo06858 CDS CDS                 | 18.5  | 2.0  | 42.0 | NA | NA | hypothetical protein |
| Fpram2121530 CDS CDS                 | 36.5  | 4.0  | 41.4 | NA | NA | hypothetical protein |
| TS28Bac6131 CDS CDS                  | 6.1   | 0.7  | 41.3 | NA | NA | hypothetical protein |
| BunI0317 CDS CDS                     | 6.1   | 0.7  | 41.3 | NA | NA | hypothetical protein |
| Bxyl1122 CDS CDS                     | 9.0   | 1.0  | 41.0 | NA | NA | hypothetical protein |
| Bxyl0225 CDS CDS                     | 3.0   | 0.3  | 40.9 | NA | NA | hypothetical protein |
| Bxyl3699 CDS CDS                     | 9.0   | 1.0  | 40.9 | NA | NA | hypothetical protein |
| Cste0815 CDS CDS                     | 1.8   | 0.2  | 40.9 | NA | NA | hypothetical protein |
| BDI3797 CDS hypothetical             | 9.0   | 1.0  | 40.9 | NA | NA | hypothetical protein |
| TS28Rum11077 CDS CDS                 | 9.0   | 1.0  | 40.9 | NA | NA | hypothetical protein |
| TS28Fae11890 CDS CDS                 | 9.0   | 1.0  | 40.9 | NA | NA | hypothetical protein |
| TS29Fae06995 CDS CDS                 | 9.0   | 1.0  | 40.9 | NA | NA | hypothetical protein |
| b1919 CDS D-cysteine                 | 4.5   | 0.5  | 40.9 | NA | NA | hypothetical protein |
| BDI2266 CDS 50S                      | 18.0  | 2.0  | 40.9 | NA | NA | hypothetical protein |
| TS28Clo09605 CDS CDS                 | 9.0   | 1.0  | 40.9 | NA | NA | hypothetical protein |
| TS29Rum15434 CDS CDS                 | 9.0   | 1.0  | 40.9 | NA | NA | hypothetical protein |
| TS28Rum13633 CDS CDS                 | 4.5   | 0.5  | 40.9 | NA | NA | hypothetical protein |
| BFvch461876 CDS levtochrome          | 4.5   | 0.5  | 40.9 | NA | NA | hypothetical protein |
| BFvch464091 CDS hypothetical         | 4.5   | 0.5  | 40.9 | NA | NA | hypothetical protein |
| Aput1934 CDS CDS                     | 9.0   | 1.0  | 40.9 | NA | NA | hypothetical protein |
| TS29Rum15065 CDS CDS                 | 9.0   | 1.0  | 40.9 | NA | NA | hypothetical protein |
| BDI0664 CDS RNA                      | 9.0   | 1.0  | 40.9 | NA | NA | hypothetical protein |
| BFvch464127 CDS hypothetical         | 4.5   | 0.5  | 40.9 | NA | NA | hypothetical protein |
| CBol1695 CDS CDS                     | 9.0   | 1.0  | 40.9 | NA | NA | hypothetical protein |
| BFvch463740 CDS hypothetical         | 4.5   | 0.5  | 40.9 | NA | NA | hypothetical protein |
| TS29Rum15984 CDS CDS                 | 9.0   | 1.0  | 40.9 | NA | NA | hypothetical protein |
| TS29RumUnc1195 CDS CDS               | 9.0   | 1.0  | 40.9 | NA | NA | hypothetical protein |
| BDI2376 CDS 30S                      | 9.0   | 1.0  | 40.9 | NA | NA | hypothetical protein |
| BFncet3528 CDS hypothetical          | 4.5   | 0.5  | 40.9 | NA | NA | hypothetical protein |
| TS29RumUnc1713 CDS CDS               | 80.0  | 9.0  | 40.4 | NA | NA | hypothetical protein |
| BactD12101 CDS CDS                   | 2.9   | 0.3  | 39.7 | NA | NA | hypothetical protein |
| BFncet1566 CDS putative              | 4.4   | 0.5  | 39.6 | NA | NA | hypothetical protein |
| BunI0933 CDS CDS                     | 104.5 | 12.0 | 39.5 | NA | NA | hypothetical protein |
| TS28Bac7847 CDS CDS                  | 8.7   | 1.0  | 39.3 | NA | NA | hypothetical protein |
| TS29Rum13815 CDS CDS                 | 26.0  | 3.0  | 39.3 | NA | NA | hypothetical protein |
| TS29Fae08295 CDS CDS                 | 13.0  | 1.5  | 39.3 | NA | NA | hypothetical protein |
| Robe0465 CDS CDS                     | 4.3   | 0.5  | 39.3 | NA | NA | hypothetical protein |
| TS28Rum15068 CDS CDS                 | 4.3   | 0.5  | 39.3 | NA | NA | hypothetical protein |
| BactD12816 CDS CDS                   | 4.3   | 0.5  | 39.3 | NA | NA | hypothetical protein |
| TS28Clo01897 CDS CDS                 | 17.2  | 2.0  | 39.0 | NA | NA | hypothetical protein |
| TS29Bac10303 CDS CDS                 | 17.0  | 2.0  | 38.6 | NA | NA | hypothetical protein |
| b4095 CDS carbon-phosphorus          | 8.5   | 1.0  | 38.6 | NA | NA | hypothetical protein |
| TS29Rum03344 CDS CDS                 | 17.0  | 2.0  | 38.6 | NA | NA | hypothetical protein |
| BDI3339 CDS putative                 | 8.5   | 1.0  | 38.6 | NA | NA | hypothetical protein |
| Bova1180 CDS CDS                     | 8.5   | 1.0  | 38.6 | NA | NA | hypothetical protein |
| BDI0828 CDS V-type                   | 21.0  | 2.5  | 38.1 | NA | NA | hypothetical protein |
| TS29Fae01039 CDS CDS                 | 88.0  | 10.5 | 38.0 | NA | NA | hypothetical protein |
| BFvch460776 CDS hypothetical         | 8.3   | 1.0  | 37.8 | NA | NA | hypothetical protein |
| BDI2384 CDS 30S                      | 8.3   | 1.0  | 37.8 | NA | NA | hypothetical protein |
| TS28Bac7643 CDS CDS                  | 2.7   | 0.3  | 37.2 | NA | NA | hypothetical protein |
| TS29Bac08805 CDS CDS                 | 41.0  | 5.0  | 37.2 | NA | NA | hypothetical protein |
| TS28Fae17686 CDS CDS                 | 49.0  | 6.0  | 37.1 | NA | NA | hypothetical protein |
| TS29Rum02227 CDS CDS                 | 56.0  | 7.0  | 36.3 | NA | NA | hypothetical protein |
| BFncet2970 CDS hypothetical          | 4.0   | 0.5  | 36.3 | NA | NA | hypothetical protein |

|                                      |       |      |      |    |    |                      |
|--------------------------------------|-------|------|------|----|----|----------------------|
| BFvch463239/CDS/laminoacyl-histidine | 4.0   | 0.5  | 36.3 | NA | NA | hypothetical protein |
| BDI0581/CDS/hypothetical             | 8.0   | 1.0  | 36.3 | NA | NA | hypothetical protein |
| b2664/CDS/DNA-binding                | 4.0   | 0.5  | 36.3 | NA | NA | hypothetical protein |
| FpraM2121796/CDS/CDS                 | 4.0   | 0.5  | 36.3 | NA | NA | hypothetical protein |
| Aput1931/CDS/CDS                     | 16.0  | 2.0  | 36.3 | NA | NA | hypothetical protein |
| BDI3562/CDS/putative                 | 8.0   | 1.0  | 36.3 | NA | NA | hypothetical protein |
| b4117/CDS/biodegradative             | 4.0   | 0.5  | 36.3 | NA | NA | hypothetical protein |
| BDI0272/CDS/putative                 | 8.0   | 1.0  | 36.3 | NA | NA | hypothetical protein |
| BFnctc0328/CDS/putative              | 4.0   | 0.5  | 36.3 | NA | NA | hypothetical protein |
| TS28Aho0722/CDS/CDS                  | 8.0   | 1.0  | 36.3 | NA | NA | hypothetical protein |
| TS28Clo05687/CDS/CDS                 | 8.0   | 1.0  | 36.3 | NA | NA | hypothetical protein |
| TS29Fae07332/CDS/CDS                 | 8.0   | 1.0  | 36.3 | NA | NA | hypothetical protein |
| b0414/CDS/fused                      | 4.0   | 0.5  | 36.3 | NA | NA | hypothetical protein |
| BFvch460302/CDS/cell                 | 4.0   | 0.5  | 36.3 | NA | NA | hypothetical protein |
| BLD0252/CDS/ABC-type                 | 4.0   | 0.5  | 36.3 | NA | NA | hypothetical protein |
| TS29Fae10268/CDS/CDS                 | 8.0   | 1.0  | 36.3 | NA | NA | hypothetical protein |
| BDI2277/CDS/sigma-54                 | 8.0   | 1.0  | 36.3 | NA | NA | hypothetical protein |
| TS29Bac07622/CDS/CDS                 | 40.0  | 5.0  | 36.3 | NA | NA | hypothetical protein |
| BFvch460510/CDS/orotate              | 8.0   | 1.0  | 36.3 | NA | NA | hypothetical protein |
| TS29Fae00210/CDS/CDS                 | 4.0   | 0.5  | 36.3 | NA | NA | hypothetical protein |
| FpraM2121543/CDS/CDS                 | 4.0   | 0.5  | 36.3 | NA | NA | hypothetical protein |
| TS29Rum07999/CDS/CDS                 | 16.0  | 2.0  | 36.3 | NA | NA | hypothetical protein |
| Aput1411/CDS/CDS                     | 8.0   | 1.0  | 36.3 | NA | NA | hypothetical protein |
| TS29Met0800/CDS/CDS                  | 8.0   | 1.0  | 36.3 | NA | NA | hypothetical protein |
| TS29Fae00892/CDS/CDS                 | 4.0   | 0.5  | 36.3 | NA | NA | hypothetical protein |
| TS28Rum15992/CDS/CDS                 | 4.0   | 0.5  | 36.3 | NA | NA | hypothetical protein |
| TS29Bac01992/CDS/CDS                 | 92.0  | 11.5 | 36.3 | NA | NA | hypothetical protein |
| Bova3955/CDS/CDS                     | 2.0   | 0.3  | 36.3 | NA | NA | hypothetical protein |
| BLD0065/CDS/hypothetical             | 2.0   | 0.3  | 36.3 | NA | NA | hypothetical protein |
| BactD12836/CDS/CDS                   | 2.0   | 0.3  | 36.3 | NA | NA | hypothetical protein |
| TS28Bac3972/CDS/CDS                  | 8.0   | 1.0  | 36.3 | NA | NA | hypothetical protein |
| BactD10210/CDS/CDS                   | 2.7   | 0.3  | 36.3 | NA | NA | hypothetical protein |
| Bxyl4254/CDS/CDS                     | 2.7   | 0.3  | 36.3 | NA | NA | hypothetical protein |
| TS29Bac02045/CDS/CDS                 | 408.7 | 51.5 | 36.0 | NA | NA | hypothetical protein |
| TS28Fae12708/CDS/CDS                 | 78.5  | 10.0 | 35.6 | NA | NA | hypothetical protein |
| TS29Bac09094/CDS/CDS                 | 35.0  | 4.5  | 35.3 | NA | NA | hypothetical protein |
| BactD13772/CDS/CDS                   | 2.6   | 0.3  | 35.2 | NA | NA | hypothetical protein |
| TS28Fae14068/CDS/CDS                 | 15.5  | 2.0  | 35.2 | NA | NA | hypothetical protein |
| EUBREC1017/CDS/3-hydroxybutyryl-coA  | 15.5  | 2.0  | 35.2 | NA | NA | hypothetical protein |
| Aput1440/CDS/CDS                     | 15.5  | 2.0  | 35.2 | NA | NA | hypothetical protein |
| BactD22267/CDS/CDS                   | 3.9   | 0.5  | 35.2 | NA | NA | hypothetical protein |
| Bxyl1397/CDS/CDS                     | 3.9   | 0.5  | 35.1 | NA | NA | hypothetical protein |
| BFnctc4018/CDS/50S                   | 11.6  | 1.5  | 35.0 | NA | NA | hypothetical protein |
| b3931/CDS/molecular                  | 3.8   | 0.5  | 34.8 | NA | NA | hypothetical protein |
| Msm0783/CDS/tungsten                 | 3.8   | 0.5  | 34.8 | NA | NA | hypothetical protein |
| Bum02911/CDS/CDS                     | 20.3  | 2.7  | 34.6 | NA | NA | hypothetical protein |
| TS28Bac1538/CDS/CDS                  | 20.3  | 2.7  | 34.6 | NA | NA | hypothetical protein |
| TS29Rum04366/CDS/CDS                 | 49.5  | 6.5  | 34.6 | NA | NA | hypothetical protein |
| Beac0198/CDS/CDS                     | 7.6   | 1.0  | 34.5 | NA | NA | hypothetical protein |
| TS29Bac12093/CDS/CDS                 | 3.8   | 0.5  | 34.4 | NA | NA | hypothetical protein |
| TS29Fae04643/CDS/CDS                 | 22.7  | 3.0  | 34.3 | NA | NA | hypothetical protein |
| BFvch464170/CDS/50S                  | 7.6   | 1.0  | 34.3 | NA | NA | hypothetical protein |
| BFnctc3992/CDS/50S                   | 7.6   | 1.0  | 34.3 | NA | NA | hypothetical protein |
| Cspl21862/CDS/CDS                    | 67.8  | 9.0  | 34.2 | NA | NA | hypothetical protein |
| Bova3649/CDS/CDS                     | 6.9   | 0.9  | 34.2 | NA | NA | hypothetical protein |
| BFnctc2233/CDS/FOF1                  | 7.5   | 1.0  | 34.0 | NA | NA | hypothetical protein |
| BFvch464369/CDS/hypothetical         | 7.5   | 1.0  | 34.0 | NA | NA | hypothetical protein |
| TS29Fae04365/CDS/CDS                 | 15.0  | 2.0  | 34.0 | NA | NA | hypothetical protein |
| BFvch462177/CDS/FOF1                 | 7.5   | 1.0  | 34.0 | NA | NA | hypothetical protein |
| BDI3376/CDS/ribosome                 | 15.0  | 2.0  | 34.0 | NA | NA | hypothetical protein |
| Bxyl2686/CDS/CDS                     | 7.5   | 1.0  | 34.0 | NA | NA | hypothetical protein |
| BFvch461706/CDS/N-acetylneuraminate  | 3.8   | 0.5  | 34.0 | NA | NA | hypothetical protein |
| BDI0711/CDS/malate                   | 15.0  | 2.0  | 34.0 | NA | NA | hypothetical protein |
| BDI2306/CDS/hypothetical             | 15.0  | 2.0  | 34.0 | NA | NA | hypothetical protein |
| b1015/CDS/proline:sodium             | 7.5   | 1.0  | 34.0 | NA | NA | hypothetical protein |
| TS28Fae18896/CDS/CDS                 | 15.0  | 2.0  | 34.0 | NA | NA | hypothetical protein |
| BDI2283/CDS/putative                 | 30.0  | 4.0  | 34.0 | NA | NA | hypothetical protein |
| Ccom0260/CDS/CDS                     | 7.5   | 1.0  | 34.0 | NA | NA | hypothetical protein |
| TS29Par523/CDS/CDS                   | 15.0  | 2.0  | 34.0 | NA | NA | hypothetical protein |
| BFvch464174/CDS/50S                  | 11.1  | 1.5  | 33.7 | NA | NA | hypothetical protein |
| BFnctc3996/CDS/50S                   | 11.1  | 1.5  | 33.7 | NA | NA | hypothetical protein |
| TS28Clo10254/CDS/CDS                 | 111.3 | 15.0 | 33.7 | NA | NA | hypothetical protein |
| BFnctc3045/CDS/hypothetical          | 3.7   | 0.5  | 33.5 | NA | NA | hypothetical protein |
| TS28Fae21943/CDS/CDS                 | 7.4   | 1.0  | 33.4 | NA | NA | hypothetical protein |
| BFvch464013/CDS/50S                  | 3.7   | 0.5  | 33.3 | NA | NA | hypothetical protein |
| BLD0185/CDS/hypothetical             | 3.7   | 0.5  | 33.3 | NA | NA | hypothetical protein |
| TS29Bac02508/CDS/CDS                 | 33.0  | 4.5  | 33.3 | NA | NA | hypothetical protein |
| Bxyl4368/CDS/CDS                     | 3.7   | 0.5  | 33.3 | NA | NA | hypothetical protein |
| TS29Rum09928/CDS/CDS                 | 11.0  | 1.5  | 33.3 | NA | NA | hypothetical protein |
| BDI2382/CDS/elongation               | 51.3  | 7.0  | 33.2 | NA | NA | hypothetical protein |
| FpraM2122295/CDS/CDS                 | 18.3  | 2.5  | 33.1 | NA | NA | hypothetical protein |
| BDI2483/CDS/cell                     | 14.5  | 2.0  | 32.9 | NA | NA | hypothetical protein |
| Bum0308/CDS/CDS                      | 6.0   | 0.8  | 32.7 | NA | NA | hypothetical protein |
| Bxyl2079/CDS/CDS                     | 1.8   | 0.3  | 32.7 | NA | NA | hypothetical protein |
| BDI0770/CDS/PhoH-like                | 18.0  | 2.5  | 32.7 | NA | NA | hypothetical protein |
| Msm0622/CDS/50S                      | 6.2   | 0.9  | 32.7 | NA | NA | hypothetical protein |
| BL0198/CDS/hypothetical              | 3.6   | 0.5  | 32.5 | NA | NA | hypothetical protein |
| TS29Bac05128/CDS/CDS                 | 59.7  | 8.3  | 32.5 | NA | NA | hypothetical protein |
| BDI2723/CDS/hypothetical             | 50.0  | 7.0  | 32.4 | NA | NA | hypothetical protein |
| Msm1404/CDS/formate                  | 10.6  | 1.5  | 32.1 | NA | NA | hypothetical protein |
| Bthe733529/CDS/CDS                   | 2.3   | 0.3  | 31.8 | NA | NA | hypothetical protein |
| BDI1236/CDS/epimerase/reductase      | 14.0  | 2.0  | 31.8 | NA | NA | hypothetical protein |
| BFnctc1360/CDS/hypothetical          | 3.5   | 0.5  | 31.8 | NA | NA | hypothetical protein |
| BFnctc3893/CDS/ATP-dependent         | 3.5   | 0.5  | 31.8 | NA | NA | hypothetical protein |

|                                       |       |      |      |    |    |                      |
|---------------------------------------|-------|------|------|----|----|----------------------|
| TS29Clo0994/CDS/CDS                   | 7.0   | 1.0  | 31.8 | NA | NA | hypothetical protein |
| Chol4552/CDS/CDS                      | 7.0   | 1.0  | 31.8 | NA | NA | hypothetical protein |
| Aput0544/CDS/CDS                      | 7.0   | 1.0  | 31.8 | NA | NA | hypothetical protein |
| b3338/CDS/periplasmic                 | 7.0   | 1.0  | 31.8 | NA | NA | hypothetical protein |
| Bun11939/CDS/CDS                      | 7.0   | 1.0  | 31.8 | NA | NA | hypothetical protein |
| BFnc23963/CDS/putative                | 3.5   | 0.5  | 31.8 | NA | NA | hypothetical protein |
| BFvch464141/CDS/location              | 3.5   | 0.5  | 31.8 | NA | NA | hypothetical protein |
| Dfor2465/CDS/CDS                      | 7.0   | 1.0  | 31.8 | NA | NA | hypothetical protein |
| TS28Rum02210/CDS/CDS                  | 3.5   | 0.5  | 31.8 | NA | NA | hypothetical protein |
| TS29Fae05927/CDS/CDS                  | 7.0   | 1.0  | 31.8 | NA | NA | hypothetical protein |
| TS28Fae05841/CDS/CDS                  | 7.0   | 1.0  | 31.8 | NA | NA | hypothetical protein |
| EUBRFC0423/CDS/S0S                    | 3.5   | 0.5  | 31.8 | NA | NA | hypothetical protein |
| BFnc24153/CDS/putative                | 3.5   | 0.5  | 31.8 | NA | NA | hypothetical protein |
| Chol4555/CDS/CDS                      | 7.0   | 1.0  | 31.8 | NA | NA | hypothetical protein |
| BDI0416/CDS/hypothetical              | 14.0  | 2.0  | 31.8 | NA | NA | hypothetical protein |
| BFnc23397/CDS/hypothetical            | 3.5   | 0.5  | 31.8 | NA | NA | hypothetical protein |
| TS29Clo3497/CDS/CDS                   | 7.0   | 1.0  | 31.8 | NA | NA | hypothetical protein |
| BDI0168/CDS/putative                  | 7.0   | 1.0  | 31.8 | NA | NA | hypothetical protein |
| BFvch461469/CDS/nicotinate-nucleotide | 3.5   | 0.5  | 31.8 | NA | NA | hypothetical protein |
| Bun11595/CDS/CDS                      | 7.0   | 1.0  | 31.8 | NA | NA | hypothetical protein |
| TS29Clo1361/CDS/CDS                   | 7.0   | 1.0  | 31.8 | NA | NA | hypothetical protein |
| BDI0647/CDS/putative                  | 7.0   | 1.0  | 31.8 | NA | NA | hypothetical protein |
| TS29Par887/CDS/CDS                    | 10.5  | 1.5  | 31.8 | NA | NA | hypothetical protein |
| TS29Rum12352/CDS/CDS                  | 7.0   | 1.0  | 31.8 | NA | NA | hypothetical protein |
| BFnc21400/CDS/putative                | 3.5   | 0.5  | 31.8 | NA | NA | hypothetical protein |
| BDI1527/CDS/putative                  | 7.0   | 1.0  | 31.8 | NA | NA | hypothetical protein |
| TS28Fae13138/CDS/CDS                  | 3.5   | 0.5  | 31.8 | NA | NA | hypothetical protein |
| BactD23944/CDS/CDS                    | 7.0   | 1.0  | 31.8 | NA | NA | hypothetical protein |
| TS28Fae18458/CDS/CDS                  | 3.5   | 0.5  | 31.8 | NA | NA | hypothetical protein |
| EUBRFC0534/CDS/hypoxanthine           | 7.0   | 1.0  | 31.8 | NA | NA | hypothetical protein |
| BFnc22334/CDS/hypothetical            | 3.5   | 0.5  | 31.8 | NA | NA | hypothetical protein |
| BL1681/CDS/hypoxanthine-guanine       | 3.5   | 0.5  | 31.8 | NA | NA | hypothetical protein |
| BDI2278/CDS/tyrosine                  | 28.0  | 4.0  | 31.8 | NA | NA | hypothetical protein |
| BFvch463763/CDS/dihydroxy-acid        | 3.5   | 0.5  | 31.8 | NA | NA | hypothetical protein |
| b3789/CDS/glucose-1-phosphate         | 3.5   | 0.5  | 31.8 | NA | NA | hypothetical protein |
| BFvch462564/CDS/hypothetical          | 3.5   | 0.5  | 31.8 | NA | NA | hypothetical protein |
| TS29Bac11505/CDS/CDS                  | 3.5   | 0.5  | 31.8 | NA | NA | hypothetical protein |
| Aput1838/CDS/CDS                      | 7.0   | 1.0  | 31.8 | NA | NA | hypothetical protein |
| TS29Rum20164/CDS/CDS                  | 7.0   | 1.0  | 31.8 | NA | NA | hypothetical protein |
| b2413/CDS/predicted                   | 3.5   | 0.5  | 31.8 | NA | NA | hypothetical protein |
| Bun10613/CDS/CDS                      | 7.0   | 1.0  | 31.8 | NA | NA | hypothetical protein |
| Msm0758/CDS/S0S                       | 3.5   | 0.5  | 31.8 | NA | NA | hypothetical protein |
| TS28Fae22220/CDS/CDS                  | 7.0   | 1.0  | 31.8 | NA | NA | hypothetical protein |
| Bova0529/CDS/CDS                      | 3.5   | 0.5  | 31.8 | NA | NA | hypothetical protein |
| BDI1476/CDS/conserved                 | 70.0  | 10.0 | 31.8 | NA | NA | hypothetical protein |
| BDI0723/CDS/hypothetical              | 35.0  | 5.0  | 31.8 | NA | NA | hypothetical protein |
| Robe1223/CDS/CDS                      | 2.3   | 0.3  | 31.8 | NA | NA | hypothetical protein |
| TS28Rum10495/CDS/CDS                  | 2.3   | 0.3  | 31.8 | NA | NA | hypothetical protein |
| TS28Bac6134/CDS/CDS                   | 2.3   | 0.3  | 31.8 | NA | NA | hypothetical protein |
| Clep0902/CDS/CDS                      | 2.3   | 0.3  | 31.8 | NA | NA | hypothetical protein |
| Bxvl4375/CDS/CDS                      | 7.0   | 1.0  | 31.8 | NA | NA | hypothetical protein |
| TS29Bac09452/CDS/CDS                  | 4.6   | 0.7  | 31.5 | NA | NA | hypothetical protein |
| BactD14458/CDS/CDS                    | 4.6   | 0.7  | 31.5 | NA | NA | hypothetical protein |
| Bxvl1677/CDS/CDS                      | 4.6   | 0.7  | 31.5 | NA | NA | hypothetical protein |
| Caer1507/CDS/CDS                      | 20.7  | 3.0  | 31.3 | NA | NA | hypothetical protein |
| TS28Clo10637/CDS/CDS                  | 102.0 | 15.0 | 30.9 | NA | NA | hypothetical protein |
| TS29Bac05748/CDS/CDS                  | 68.0  | 10.0 | 30.9 | NA | NA | hypothetical protein |
| BDI0210/CDS/glycoside                 | 34.0  | 5.0  | 30.9 | NA | NA | hypothetical protein |
| Bxvl1820/CDS/CDS                      | 2.3   | 0.3  | 30.6 | NA | NA | hypothetical protein |
| TS28Fae01719/CDS/CDS                  | 13.5  | 2.0  | 30.6 | NA | NA | hypothetical protein |
| Bxvl0419/CDS/CDS                      | 2.2   | 0.3  | 30.4 | NA | NA | hypothetical protein |
| BFvch462788/CDS/tyrosine              | 2.2   | 0.3  | 30.4 | NA | NA | hypothetical protein |
| TS28Bac3047/CDS/CDS                   | 1.7   | 0.3  | 30.3 | NA | NA | hypothetical protein |
| Bun0275/CDS/CDS                       | 6.7   | 1.0  | 30.3 | NA | NA | hypothetical protein |
| FpraM2120746/CDS/CDS                  | 3.3   | 0.5  | 30.3 | NA | NA | hypothetical protein |
| TS28Rum09604/CDS/CDS                  | 10.0  | 1.5  | 30.3 | NA | NA | hypothetical protein |
| Aput2363/CDS/CDS                      | 20.0  | 3.0  | 30.3 | NA | NA | hypothetical protein |
| TS29Clo0433/CDS/CDS                   | 10.0  | 1.5  | 30.3 | NA | NA | hypothetical protein |
| TS28Clo0352/CDS/CDS                   | 13.3  | 2.0  | 30.3 | NA | NA | hypothetical protein |
| BFnc2496/CDS/putative                 | 3.3   | 0.5  | 30.3 | NA | NA | hypothetical protein |
| BFvch461853/CDS/6-phosphogluconate    | 3.3   | 0.5  | 30.3 | NA | NA | hypothetical protein |
| BFvch462414/CDS/hypothetical          | 3.3   | 0.5  | 30.3 | NA | NA | hypothetical protein |
| EFER0050/CDS/putative                 | 3.3   | 0.5  | 30.3 | NA | NA | hypothetical protein |
| BFnc20920/CDS/putative                | 3.3   | 0.5  | 30.3 | NA | NA | hypothetical protein |
| BFvch460999/CDS/putative              | 3.3   | 0.5  | 30.3 | NA | NA | hypothetical protein |
| BLD0478/CDS/ATP                       | 2.2   | 0.3  | 30.0 | NA | NA | hypothetical protein |
| b1474/CDS/formate                     | 3.3   | 0.5  | 30.0 | NA | NA | hypothetical protein |
| BDI2313/CDS/hypothetical              | 33.0  | 5.0  | 30.0 | NA | NA | hypothetical protein |
| BDI0661/CDS/translation               | 13.2  | 2.0  | 29.9 | NA | NA | hypothetical protein |
| TS29Fae00068/CDS/CDS                  | 6.6   | 1.0  | 29.9 | NA | NA | hypothetical protein |
| BFvch461000/CDS/putative              | 6.5   | 1.0  | 29.5 | NA | NA | hypothetical protein |
| TS28Clo11416/CDS/CDS                  | 6.5   | 1.0  | 29.5 | NA | NA | hypothetical protein |
| Aput0248/CDS/CDS                      | 6.5   | 1.0  | 29.5 | NA | NA | hypothetical protein |
| TS29Clo3365/CDS/CDS                   | 6.5   | 1.0  | 29.5 | NA | NA | hypothetical protein |
| TS28Fae21699/CDS/CDS                  | 6.5   | 1.0  | 29.5 | NA | NA | hypothetical protein |
| BDI0463/CDS/electron                  | 13.0  | 2.0  | 29.5 | NA | NA | hypothetical protein |
| Aput0802/CDS/CDS                      | 13.0  | 2.0  | 29.5 | NA | NA | hypothetical protein |
| Bun11376/CDS/CDS                      | 6.5   | 1.0  | 29.5 | NA | NA | hypothetical protein |
| BFnc23677/CDS/hypothetical            | 6.5   | 1.0  | 29.5 | NA | NA | hypothetical protein |
| Bun11549/CDS/CDS                      | 6.5   | 1.0  | 29.5 | NA | NA | hypothetical protein |
| b4263/CDS/predicted                   | 13.0  | 2.0  | 29.5 | NA | NA | hypothetical protein |
| BDI0164/CDS/lactoylglutathione        | 13.0  | 2.0  | 29.5 | NA | NA | hypothetical protein |
| BL1343/CDS/glucosamine-6-phosphate    | 4.3   | 0.7  | 29.5 | NA | NA | hypothetical protein |
| Bun10932/CDS/CDS                      | 44.2  | 6.8  | 29.3 | NA | NA | hypothetical protein |
| Bova0532/CDS/CDS                      | 64.6  | 10.0 | 29.3 | NA | NA | hypothetical protein |

|                                    |      |      |      |    |    |                      |
|------------------------------------|------|------|------|----|----|----------------------|
| BFnctc0108/CDS/putative            | 9.7  | 1.5  | 29.3 | NA | NA | hypothetical protein |
| TS29Fae08624/CDS/CDS               | 96.5 | 15.0 | 29.2 | NA | NA | hypothetical protein |
| BFnctc4022/CDS/elongation          | 48.0 | 7.5  | 29.1 | NA | NA | hypothetical protein |
| Aput0496/CDS/CDS                   | 16.0 | 2.5  | 29.1 | NA | NA | hypothetical protein |
| Msm1016/CDS/methyl-coenzyme        | 14.8 | 2.3  | 28.9 | NA | NA | hypothetical protein |
| TS28Rum13807/CDS/CDS               | 9.5  | 1.5  | 28.9 | NA | NA | hypothetical protein |
| BactD23874/CDS/CDS                 | 3.2  | 0.5  | 28.8 | NA | NA | hypothetical protein |
| BFnctc3195/CDS/hypothetical        | 3.2  | 0.5  | 28.8 | NA | NA | hypothetical protein |
| BFvch463320/CDS/excinuclease       | 3.2  | 0.5  | 28.8 | NA | NA | hypothetical protein |
| Bova4219/CDS/CDS                   | 3.2  | 0.5  | 28.8 | NA | NA | hypothetical protein |
| BFych461478/CDS/phosphoglucutase   | 9.5  | 1.5  | 28.8 | NA | NA | hypothetical protein |
| BDI2379/CDS/SOS                    | 19.0 | 3.0  | 28.8 | NA | NA | hypothetical protein |
| BDI3819/CDS/hypothetical           | 19.0 | 3.0  | 28.8 | NA | NA | hypothetical protein |
| b3212/CDS/glutamate                | 6.3  | 1.0  | 28.8 | NA | NA | hypothetical protein |
| TS28Rum13612/CDS/CDS               | 22.0 | 3.5  | 28.5 | NA | NA | hypothetical protein |
| BT3833/CDS/SOS                     | 12.6 | 2.0  | 28.5 | NA | NA | hypothetical protein |
| TS29Bac04216/CDS/CDS               | 31.0 | 5.0  | 28.1 | NA | NA | hypothetical protein |
| Bxyl0239/CDS/CDS                   | 5.2  | 0.8  | 28.1 | NA | NA | hypothetical protein |
| TS28Ram01135/CDS/CDS               | 6.2  | 1.0  | 28.0 | NA | NA | hypothetical protein |
| Aput0975/CDS/CDS                   | 37.0 | 6.0  | 28.0 | NA | NA | hypothetical protein |
| BFnctc2235/CDS/FOF1                | 3.1  | 0.5  | 27.9 | NA | NA | hypothetical protein |
| Bum11280/CDS/CDS                   | 46.0 | 7.5  | 27.8 | NA | NA | hypothetical protein |
| BactD14372/CDS/CDS                 | 1.5  | 0.3  | 27.8 | NA | NA | hypothetical protein |
| BFvch463801/CDS/methylmalonyl-CoA  | 8.2  | 1.3  | 27.8 | NA | NA | hypothetical protein |
| TS29Bac02507/CDS/CDS               | 82.5 | 13.5 | 27.7 | NA | NA | hypothetical protein |
| BFnctc2227/CDS/FOF1                | 9.1  | 1.5  | 27.6 | NA | NA | hypothetical protein |
| Bum13320/CDS/CDS                   | 2.0  | 0.3  | 27.2 | NA | NA | hypothetical protein |
| Bxyl4317/CDS/CDS                   | 2.0  | 0.3  | 27.2 | NA | NA | hypothetical protein |
| TS28Bac0967/CDS/CDS                | 2.0  | 0.3  | 27.2 | NA | NA | hypothetical protein |
| BLD0020/CDS/ABC-type               | 2.0  | 0.3  | 27.2 | NA | NA | hypothetical protein |
| BFych464019/CDS/beta-galactosidase | 2.0  | 0.3  | 27.2 | NA | NA | hypothetical protein |
| Msm0001/CDS/exoribonuclease        | 2.0  | 0.3  | 27.2 | NA | NA | hypothetical protein |
| FpraM2121454/CDS/CDS               | 12.0 | 2.0  | 27.2 | NA | NA | hypothetical protein |
| Bfra31123232/CDS/CDS               | 12.0 | 2.0  | 27.2 | NA | NA | hypothetical protein |
| BFvch463426/CDS/AraC               | 6.0  | 1.0  | 27.2 | NA | NA | hypothetical protein |
| BDI2020/CDS/putative               | 6.0  | 1.0  | 27.2 | NA | NA | hypothetical protein |
| TS29Bac07229/CDS/CDS               | 24.0 | 4.0  | 27.2 | NA | NA | hypothetical protein |
| b3704/CDS/protein                  | 6.0  | 1.0  | 27.2 | NA | NA | hypothetical protein |
| BFvch461409/CDS/hypothetical       | 3.0  | 0.5  | 27.2 | NA | NA | hypothetical protein |
| FpraM2122635/CDS/CDS               | 3.0  | 0.5  | 27.2 | NA | NA | hypothetical protein |
| Bova1673/CDS/CDS                   | 6.0  | 1.0  | 27.2 | NA | NA | hypothetical protein |
| TS29Aii203/CDS/CDS                 | 6.0  | 1.0  | 27.2 | NA | NA | hypothetical protein |
| BDI2941/CDS/probable               | 30.0 | 5.0  | 27.2 | NA | NA | hypothetical protein |
| BDI2685/CDS/hypothetical           | 24.0 | 4.0  | 27.2 | NA | NA | hypothetical protein |
| TS28Fae22445/CDS/CDS               | 6.0  | 1.0  | 27.2 | NA | NA | hypothetical protein |
| Bxyl3876/CDS/CDS                   | 3.0  | 0.5  | 27.2 | NA | NA | hypothetical protein |
| BDI3968/CDS/SOS                    | 6.0  | 1.0  | 27.2 | NA | NA | hypothetical protein |
| BFnctc3248/CDS/AraC                | 6.0  | 1.0  | 27.2 | NA | NA | hypothetical protein |
| b2976/CDS/malate                   | 3.0  | 0.5  | 27.2 | NA | NA | hypothetical protein |
| TS28Rum14250/CDS/CDS               | 3.0  | 0.5  | 27.2 | NA | NA | hypothetical protein |
| TS29Bac03632/CDS/CDS               | 12.0 | 2.0  | 27.2 | NA | NA | hypothetical protein |
| TS28Bac4598/CDS/CDS                | 6.0  | 1.0  | 27.2 | NA | NA | hypothetical protein |
| BDI2358/CDS/translation            | 6.0  | 1.0  | 27.2 | NA | NA | hypothetical protein |
| BFvch460464/CDS/hypothetical       | 6.0  | 1.0  | 27.2 | NA | NA | hypothetical protein |
| BDI1210/CDS/rRNA                   | 6.0  | 1.0  | 27.2 | NA | NA | hypothetical protein |
| BDI2027/CDS/hypothetical           | 6.0  | 1.0  | 27.2 | NA | NA | hypothetical protein |
| Aput1133/CDS/CDS                   | 6.0  | 1.0  | 27.2 | NA | NA | hypothetical protein |
| Msm1431/CDS/SOS                    | 1.5  | 0.3  | 27.2 | NA | NA | hypothetical protein |
| TS29Rum18437/CDS/CDS               | 6.0  | 1.0  | 27.2 | NA | NA | hypothetical protein |
| str1734/CDS/sucrose-specific       | 3.0  | 0.5  | 27.2 | NA | NA | hypothetical protein |
| BFvch462861/CDS/hypothetical       | 3.0  | 0.5  | 27.2 | NA | NA | hypothetical protein |
| BFnctc1345/CDS/hypothetical        | 3.0  | 0.5  | 27.2 | NA | NA | hypothetical protein |
| BFvch462241/CDS/hypothetical       | 6.0  | 1.0  | 27.2 | NA | NA | hypothetical protein |
| FpraM2122253/CDS/CDS               | 3.0  | 0.5  | 27.2 | NA | NA | hypothetical protein |
| Robe2888/CDS/CDS                   | 6.0  | 1.0  | 27.2 | NA | NA | hypothetical protein |
| b2507/CDS/GMP                      | 3.0  | 0.5  | 27.2 | NA | NA | hypothetical protein |
| Chol3714/CDS/CDS                   | 6.0  | 1.0  | 27.2 | NA | NA | hypothetical protein |
| Robe3355/CDS/CDS                   | 6.0  | 1.0  | 27.2 | NA | NA | hypothetical protein |
| BDI0265/CDS/ATP                    | 6.0  | 1.0  | 27.2 | NA | NA | hypothetical protein |
| BFvch463739/CDS/hypothetical       | 6.0  | 1.0  | 27.2 | NA | NA | hypothetical protein |
| BDI1749/CDS/ROK                    | 6.0  | 1.0  | 27.2 | NA | NA | hypothetical protein |
| BDI0206/CDS/deoxyxycytidylate      | 6.0  | 1.0  | 27.2 | NA | NA | hypothetical protein |
| TS29Clo3168/CDS/CDS                | 6.0  | 1.0  | 27.2 | NA | NA | hypothetical protein |
| TS28Rum12399/CDS/CDS               | 3.0  | 0.5  | 27.2 | NA | NA | hypothetical protein |
| BDI1816/CDS/glycerol               | 6.0  | 1.0  | 27.2 | NA | NA | hypothetical protein |
| TS28Clo05858/CDS/CDS               | 6.0  | 1.0  | 27.2 | NA | NA | hypothetical protein |
| TS29Fae02471/CDS/CDS               | 6.0  | 1.0  | 27.2 | NA | NA | hypothetical protein |
| BDI2638/CDS/putative               | 6.0  | 1.0  | 27.2 | NA | NA | hypothetical protein |
| TS29Fae06405/CDS/CDS               | 24.0 | 4.0  | 27.2 | NA | NA | hypothetical protein |
| TS29Clo0894/CDS/CDS                | 6.0  | 1.0  | 27.2 | NA | NA | hypothetical protein |
| Acac2673/CDS/CDS                   | 6.0  | 1.0  | 27.2 | NA | NA | hypothetical protein |
| BDI3818/CDS/hypothetical           | 12.0 | 2.0  | 27.2 | NA | NA | hypothetical protein |
| TS29Rum20884/CDS/CDS               | 6.0  | 1.0  | 27.2 | NA | NA | hypothetical protein |
| Aput0350/CDS/CDS                   | 6.0  | 1.0  | 27.2 | NA | NA | hypothetical protein |
| BDI3802/CDS/hypothetical           | 6.0  | 1.0  | 27.2 | NA | NA | hypothetical protein |
| Bum2609/CDS/CDS                    | 6.0  | 1.0  | 27.2 | NA | NA | hypothetical protein |
| BDI0459/CDS/putative               | 6.0  | 1.0  | 27.2 | NA | NA | hypothetical protein |
| BDI2308/CDS/type                   | 6.0  | 1.0  | 27.2 | NA | NA | hypothetical protein |
| TS29Rum16564/CDS/CDS               | 3.0  | 0.5  | 27.2 | NA | NA | hypothetical protein |
| b3266/CDS/multidrug                | 3.0  | 0.5  | 27.2 | NA | NA | hypothetical protein |
| TS29Clo1425/CDS/CDS                | 6.0  | 1.0  | 27.2 | NA | NA | hypothetical protein |
| BFnctc3231/CDS/hypothetical        | 6.0  | 1.0  | 27.2 | NA | NA | hypothetical protein |
| TS29Met0801/CDS/CDS                | 6.0  | 1.0  | 27.2 | NA | NA | hypothetical protein |
| b3741/CDS/glucose-inhibited        | 3.0  | 0.5  | 27.2 | NA | NA | hypothetical protein |
| TS29Rum06302/CDS/CDS               | 3.0  | 0.5  | 27.2 | NA | NA | hypothetical protein |

|                                          |       |      |      |    |    |                      |
|------------------------------------------|-------|------|------|----|----|----------------------|
| BDI3595 CDS two-component                | 6.0   | 1.0  | 27.2 | NA | NA | hypothetical protein |
| Cint333 CDS CDS                          | 6.0   | 1.0  | 27.2 | NA | NA | hypothetical protein |
| BFncet3542 CDS putative                  | 6.0   | 1.0  | 27.2 | NA | NA | hypothetical protein |
| TS29Fae09748 CDS CDS                     | 3.0   | 0.5  | 27.2 | NA | NA | hypothetical protein |
| BDI2753 CDS peptide                      | 6.0   | 1.0  | 27.2 | NA | NA | hypothetical protein |
| Aput1493 CDS CDS                         | 6.0   | 1.0  | 27.2 | NA | NA | hypothetical protein |
| BFncet3527 CDS hypothetical              | 6.0   | 1.0  | 27.2 | NA | NA | hypothetical protein |
| BactD21559 CDS CDS                       | 6.0   | 1.0  | 27.2 | NA | NA | hypothetical protein |
| TS28Clo07103 CDS CDS                     | 6.0   | 1.0  | 27.2 | NA | NA | hypothetical protein |
| TS28Clo06234 CDS CDS                     | 6.0   | 1.0  | 27.2 | NA | NA | hypothetical protein |
| b3818 CDS predicted                      | 6.0   | 1.0  | 27.2 | NA | NA | hypothetical protein |
| TS28Rum13653 CDS CDS                     | 9.0   | 1.5  | 27.2 | NA | NA | hypothetical protein |
| BFncet1409 CDS putative                  | 9.0   | 1.5  | 27.2 | NA | NA | hypothetical protein |
| TS29Fae04314 CDS CDS                     | 36.0  | 6.0  | 27.2 | NA | NA | hypothetical protein |
| TS29Fae00037 CDS CDS                     | 18.0  | 3.0  | 27.2 | NA | NA | hypothetical protein |
| TS28Bac5793 CDS CDS                      | 18.0  | 3.0  | 27.2 | NA | NA | hypothetical protein |
| TS29Clo1421 CDS CDS                      | 9.0   | 1.5  | 27.2 | NA | NA | hypothetical protein |
| BDI2365 CDS 50S                          | 18.0  | 3.0  | 27.2 | NA | NA | hypothetical protein |
| BDI1203 CDS superoxide                   | 18.0  | 3.0  | 27.2 | NA | NA | hypothetical protein |
| TS29Bac08221 CDS CDS                     | 18.0  | 3.0  | 27.2 | NA | NA | hypothetical protein |
| Bxyl4361 CDS CDS                         | 9.0   | 1.5  | 27.1 | NA | NA | hypothetical protein |
| TS29Met0524 CDS CDS                      | 70.8  | 12.0 | 26.8 | NA | NA | hypothetical protein |
| BFvch464177 CDS 30S                      | 11.8  | 2.0  | 26.7 | NA | NA | hypothetical protein |
| BFncet3999 CDS 30S                       | 11.8  | 2.0  | 26.7 | NA | NA | hypothetical protein |
| TS28Rum13671 CDS CDS                     | 23.5  | 4.0  | 26.7 | NA | NA | hypothetical protein |
| TS29Rum13371 CDS CDS                     | 23.5  | 4.0  | 26.7 | NA | NA | hypothetical protein |
| BDI3496 CDS putative                     | 47.0  | 8.0  | 26.7 | NA | NA | hypothetical protein |
| Msm0051 CDS adhesin-like                 | 58.7  | 10.0 | 26.6 | NA | NA | hypothetical protein |
| BactD10931 CDS CDS                       | 1.5   | 0.3  | 26.6 | NA | NA | hypothetical protein |
| Beac2197 CDS CDS                         | 1.5   | 0.3  | 26.6 | NA | NA | hypothetical protein |
| Bova3213 CDS CDS                         | 5.8   | 1.0  | 26.5 | NA | NA | hypothetical protein |
| Aput1549 CDS CDS                         | 35.0  | 6.0  | 26.5 | NA | NA | hypothetical protein |
| BFvch464176 CDS 50S                      | 8.7   | 1.5  | 26.2 | NA | NA | hypothetical protein |
| TS29Bac12273 CDS CDS                     | 46.0  | 8.0  | 26.1 | NA | NA | hypothetical protein |
| TS29Rum08912 CDS CDS                     | 7.7   | 1.3  | 26.1 | NA | NA | hypothetical protein |
| Bum1024 CDS CDS                          | 28.6  | 5.0  | 26.0 | NA | NA | hypothetical protein |
| TS29RumUnc0851 CDS CDS                   | 74.4  | 13.0 | 26.0 | NA | NA | hypothetical protein |
| TS29Bac11676 CDS CDS                     | 11.4  | 2.0  | 25.9 | NA | NA | hypothetical protein |
| Bxyl4373 CDS CDS                         | 5.7   | 1.0  | 25.7 | NA | NA | hypothetical protein |
| b3792 CDS O-antigen                      | 5.7   | 1.0  | 25.7 | NA | NA | hypothetical protein |
| TS29Bac06581 CDS CDS                     | 5.7   | 1.0  | 25.7 | NA | NA | hypothetical protein |
| TS28Fae10209 CDS CDS                     | 5.7   | 1.0  | 25.7 | NA | NA | hypothetical protein |
| BDI0209 CDS glycosyltransferase          | 17.0  | 3.0  | 25.7 | NA | NA | hypothetical protein |
| TS28Clo07027 CDS CDS                     | 17.0  | 3.0  | 25.7 | NA | NA | hypothetical protein |
| BDI3222 CDS hypothetical                 | 34.0  | 6.0  | 25.7 | NA | NA | hypothetical protein |
| TS29Dor1206 CDS CDS                      | 17.0  | 3.0  | 25.7 | NA | NA | hypothetical protein |
| BDI0145 CDS sugar                        | 17.0  | 3.0  | 25.7 | NA | NA | hypothetical protein |
| TS29RumUnc0461 CDS CDS                   | 22.5  | 4.0  | 25.5 | NA | NA | hypothetical protein |
| TS28Bac1477 CDS CDS                      | 19.7  | 3.5  | 25.5 | NA | NA | hypothetical protein |
| Bum13535 CDS CDS                         | 19.7  | 3.5  | 25.5 | NA | NA | hypothetical protein |
| Bova2383 CDS CDS                         | 5.6   | 1.0  | 25.5 | NA | NA | hypothetical protein |
| Msm1414 CDS tungsten                     | 1.4   | 0.3  | 25.4 | NA | NA | hypothetical protein |
| TS29Bac09992 CDS CDS                     | 28.0  | 5.0  | 25.4 | NA | NA | hypothetical protein |
| TS29Rum01496 CDS CDS                     | 28.0  | 5.0  | 25.4 | NA | NA | hypothetical protein |
| BDI2647 CDS putative                     | 50.0  | 9.0  | 25.2 | NA | NA | hypothetical protein |
| FpraM2120034 CDS CDS                     | 13.8  | 2.5  | 25.1 | NA | NA | hypothetical protein |
| TS28Rum14402 CDS CDS                     | 19.3  | 3.5  | 25.1 | NA | NA | hypothetical protein |
| TS29Bac04437 CDS CDS                     | 19.3  | 3.5  | 25.1 | NA | NA | hypothetical protein |
| BFncet4020 CDS putative                  | 11.0  | 2.0  | 25.0 | NA | NA | hypothetical protein |
| BFvch464197 CDS transcription            | 11.0  | 2.0  | 25.0 | NA | NA | hypothetical protein |
| ShigsnD91533 CDS CDS                     | 5.5   | 1.0  | 25.0 | NA | NA | hypothetical protein |
| TS28Clo05832 CDS CDS                     | 11.0  | 2.0  | 25.0 | NA | NA | hypothetical protein |
| Robe1927 CDS CDS                         | 5.5   | 1.0  | 25.0 | NA | NA | hypothetical protein |
| TS28Clo02843 CDS CDS                     | 11.0  | 2.0  | 25.0 | NA | NA | hypothetical protein |
| BFvch461858 CDS hypothetical             | 11.0  | 2.0  | 25.0 | NA | NA | hypothetical protein |
| BDI2104 CDS UDP-3-O-[3-hydroxymyristoyl] | 11.0  | 2.0  | 25.0 | NA | NA | hypothetical protein |
| Bum0610 CDS CDS                          | 11.0  | 2.0  | 25.0 | NA | NA | hypothetical protein |
| EFER4119 CDS putative                    | 5.5   | 1.0  | 25.0 | NA | NA | hypothetical protein |
| TS29Rum18423 CDS CDS                     | 22.0  | 4.0  | 25.0 | NA | NA | hypothetical protein |
| TS28Fae17013 CDS CDS                     | 5.5   | 1.0  | 25.0 | NA | NA | hypothetical protein |
| b0977 CDS protein                        | 5.5   | 1.0  | 25.0 | NA | NA | hypothetical protein |
| TS29Rum04739 CDS CDS                     | 11.0  | 2.0  | 25.0 | NA | NA | hypothetical protein |
| Aput0526 CDS CDS                         | 22.0  | 4.0  | 25.0 | NA | NA | hypothetical protein |
| TS28Col1485 CDS CDS                      | 11.0  | 2.0  | 25.0 | NA | NA | hypothetical protein |
| TS28Fae18730 CDS CDS                     | 11.0  | 2.0  | 25.0 | NA | NA | hypothetical protein |
| TS28Eub2055 CDS CDS                      | 5.5   | 1.0  | 25.0 | NA | NA | hypothetical protein |
| b4325 CDS predicted                      | 5.5   | 1.0  | 25.0 | NA | NA | hypothetical protein |
| BDI1339 CDS glycoside                    | 11.0  | 2.0  | 25.0 | NA | NA | hypothetical protein |
| BDI3487 CDS 50S                          | 11.0  | 2.0  | 25.0 | NA | NA | hypothetical protein |
| TS28Fae14843 CDS CDS                     | 11.0  | 2.0  | 25.0 | NA | NA | hypothetical protein |
| Aput1177 CDS CDS                         | 11.0  | 2.0  | 25.0 | NA | NA | hypothetical protein |
| TS28Fae00238 CDS CDS                     | 5.5   | 1.0  | 25.0 | NA | NA | hypothetical protein |
| BDI2634 CDS hypothetical                 | 11.0  | 2.0  | 25.0 | NA | NA | hypothetical protein |
| BDI2051 CDS hypothetical                 | 11.0  | 2.0  | 25.0 | NA | NA | hypothetical protein |
| TS29Par799 CDS CDS                       | 5.5   | 1.0  | 25.0 | NA | NA | hypothetical protein |
| BFncet3811 CDS putative                  | 5.5   | 1.0  | 25.0 | NA | NA | hypothetical protein |
| TS29Rum08882 CDS CDS                     | 55.0  | 10.0 | 25.0 | NA | NA | hypothetical protein |
| BDI3804 CDS glutamate                    | 33.0  | 6.0  | 25.0 | NA | NA | hypothetical protein |
| TS29Fae08573 CDS CDS                     | 120.5 | 22.0 | 24.9 | NA | NA | hypothetical protein |
| Cspl21861 CDS CDS                        | 30.0  | 5.5  | 24.8 | NA | NA | hypothetical protein |
| TS29Bac11989 CDS CDS                     | 65.3  | 12.0 | 24.7 | NA | NA | hypothetical protein |
| Msm1409 CDS tungsten                     | 3.8   | 0.7  | 24.6 | NA | NA | hypothetical protein |
| BFvch463742 CDS putative                 | 5.4   | 1.0  | 24.6 | NA | NA | hypothetical protein |
| BDI1206 CDS hypothetical                 | 27.0  | 5.0  | 24.5 | NA | NA | hypothetical protein |
| TS28Rum09603 CDS CDS                     | 56.5  | 10.5 | 24.4 | NA | NA | hypothetical protein |

|                                                |      |      |      |    |    |                      |
|------------------------------------------------|------|------|------|----|----|----------------------|
| Caer1380 CDS CDS                               | 9.8  | 1.8  | 24.3 | NA | NA | hypothetical protein |
| BFvch462988 CDS 2-amino-3-ketobutvrate         | 2.7  | 0.5  | 24.2 | NA | NA | hypothetical protein |
| TS29Rum02179 CDS CDS                           | 2.7  | 0.5  | 24.2 | NA | NA | hypothetical protein |
| Bxvl147 CDS CDS                                | 5.3  | 1.0  | 24.2 | NA | NA | hypothetical protein |
| BFnctc0153 CDS UDP-N-acetylglucosamine         | 2.7  | 0.5  | 24.2 | NA | NA | hypothetical protein |
| BFvch464466 CDS lacyl-CoA                      | 2.7  | 0.5  | 24.2 | NA | NA | hypothetical protein |
| EUBREC3013 CDS hypothetical                    | 10.7 | 2.0  | 24.2 | NA | NA | hypothetical protein |
| TS29Rum15345 CDS CDS                           | 29.3 | 5.5  | 24.2 | NA | NA | hypothetical protein |
| BDI2299 CDS hypothetical                       | 16.0 | 3.0  | 24.2 | NA | NA | hypothetical protein |
| TS28Rum08239 CDS CDS                           | 8.0  | 1.5  | 24.2 | NA | NA | hypothetical protein |
| TS29Clo3119 CDS CDS                            | 8.0  | 1.5  | 24.2 | NA | NA | hypothetical protein |
| BDI2370 CDS 50S                                | 16.0 | 3.0  | 24.2 | NA | NA | hypothetical protein |
| Casp1293 CDS CDS                               | 5.3  | 1.0  | 24.2 | NA | NA | hypothetical protein |
| BFvch463746 CDS TonB                           | 5.3  | 1.0  | 24.2 | NA | NA | hypothetical protein |
| TS29Rum13707 CDS CDS                           | 5.3  | 1.0  | 24.2 | NA | NA | hypothetical protein |
| Chvl2948 CDS CDS                               | 5.3  | 1.0  | 24.2 | NA | NA | hypothetical protein |
| BDI0493 CDS putative                           | 37.0 | 7.0  | 24.0 | NA | NA | hypothetical protein |
| TS28Fae01389 CDS CDS                           | 1.8  | 0.3  | 23.8 | NA | NA | hypothetical protein |
| TS28Fae12405 CDS CDS                           | 10.5 | 2.0  | 23.8 | NA | NA | hypothetical protein |
| BFnctc3995 CDS 50S                             | 2.6  | 0.5  | 23.8 | NA | NA | hypothetical protein |
| TS29Dor2150 CDS CDS                            | 21.0 | 4.0  | 23.8 | NA | NA | hypothetical protein |
| BFvch464173 CDS 50S                            | 2.6  | 0.5  | 23.8 | NA | NA | hypothetical protein |
| BDI3732 CDS hypothetical                       | 21.0 | 4.0  | 23.8 | NA | NA | hypothetical protein |
| Bun12118 CDS CDS                               | 10.5 | 2.0  | 23.8 | NA | NA | hypothetical protein |
| BDI0660 CDS threonyl-tRNA                      | 31.5 | 6.0  | 23.8 | NA | NA | hypothetical protein |
| Bun13150 CDS CDS                               | 36.5 | 7.0  | 23.7 | NA | NA | hypothetical protein |
| Msm1336 CDS heterodisulfide                    | 13.0 | 2.5  | 23.7 | NA | NA | hypothetical protein |
| BactD13254 CDS CDS                             | 5.2  | 1.0  | 23.6 | NA | NA | hypothetical protein |
| Aput1619 CDS CDS                               | 26.0 | 5.0  | 23.6 | NA | NA | hypothetical protein |
| TS29Fae08133 CDS CDS                           | 5.2  | 1.0  | 23.5 | NA | NA | hypothetical protein |
| BFvch463269 CDS phosphoglycerate               | 10.3 | 2.0  | 23.5 | NA | NA | hypothetical protein |
| BFnctc3107 CDS phosphoglycerate                | 10.3 | 2.0  | 23.5 | NA | NA | hypothetical protein |
| Msm1741407 CDS CDS                             | 61.7 | 12.0 | 23.3 | NA | NA | hypothetical protein |
| TS28Fae18610 CDS CDS                           | 44.5 | 8.7  | 23.3 | NA | NA | hypothetical protein |
| TS29Fae08167 CDS CDS                           | 44.5 | 8.7  | 23.3 | NA | NA | hypothetical protein |
| Bxyl1101 CDS CDS                               | 3.4  | 0.7  | 23.0 | NA | NA | hypothetical protein |
| Robe0613 CDS CDS                               | 95.5 | 19.0 | 22.8 | NA | NA | hypothetical protein |
| b3903 CDS L-rhamnose                           | 1.7  | 0.3  | 22.7 | NA | NA | hypothetical protein |
| TS28Bac4653 CDS CDS                            | 1.7  | 0.3  | 22.7 | NA | NA | hypothetical protein |
| BactD14369 CDS CDS                             | 1.7  | 0.3  | 22.7 | NA | NA | hypothetical protein |
| BFnctc1216 CDS putative                        | 1.7  | 0.3  | 22.7 | NA | NA | hypothetical protein |
| Bxyl0237 CDS CDS                               | 5.0  | 1.0  | 22.7 | NA | NA | hypothetical protein |
| TS29Rum18157 CDS CDS                           | 5.0  | 1.0  | 22.7 | NA | NA | hypothetical protein |
| BDI0650 CDS putative                           | 5.0  | 1.0  | 22.7 | NA | NA | hypothetical protein |
| BDI1191 CDS hypothetical                       | 5.0  | 1.0  | 22.7 | NA | NA | hypothetical protein |
| TS28Clo6689 CDS CDS                            | 5.0  | 1.0  | 22.7 | NA | NA | hypothetical protein |
| Bxyl0403 CDS CDS                               | 2.5  | 0.5  | 22.7 | NA | NA | hypothetical protein |
| BFnctc0443 CDS gamma-glutamyl                  | 2.5  | 0.5  | 22.7 | NA | NA | hypothetical protein |
| BDI3969 CDS 50S                                | 5.0  | 1.0  | 22.7 | NA | NA | hypothetical protein |
| BFvch460498 CDS gamma-glutamyl                 | 2.5  | 0.5  | 22.7 | NA | NA | hypothetical protein |
| TS28Aio708 CDS CDS                             | 5.0  | 1.0  | 22.7 | NA | NA | hypothetical protein |
| BDI1042 CDS NADP-reducing                      | 5.0  | 1.0  | 22.7 | NA | NA | hypothetical protein |
| Bean2910 CDS CDS                               | 5.0  | 1.0  | 22.7 | NA | NA | hypothetical protein |
| BFnctc0936 CDS 2-dehydro-3-deoxyphosphoconate  | 2.5  | 0.5  | 22.7 | NA | NA | hypothetical protein |
| CspM6211506 CDS CDS                            | 5.0  | 1.0  | 22.7 | NA | NA | hypothetical protein |
| Cbol4770 CDS CDS                               | 5.0  | 1.0  | 22.7 | NA | NA | hypothetical protein |
| b3376 CDS conserved                            | 2.5  | 0.5  | 22.7 | NA | NA | hypothetical protein |
| BDI1800 CDS indolepyruvate                     | 10.0 | 2.0  | 22.7 | NA | NA | hypothetical protein |
| BFnctc1587 CDS hypothetical                    | 2.5  | 0.5  | 22.7 | NA | NA | hypothetical protein |
| BFnctc2393 CDS ATP-dependent                   | 10.0 | 2.0  | 22.7 | NA | NA | hypothetical protein |
| BDI0662 CDS 50S                                | 5.0  | 1.0  | 22.7 | NA | NA | hypothetical protein |
| BT2617 CDS reverse                             | 5.0  | 1.0  | 22.7 | NA | NA | hypothetical protein |
| TS28Rum01613 CDS CDS                           | 5.0  | 1.0  | 22.7 | NA | NA | hypothetical protein |
| BFvch461632 CDS hypothetical                   | 5.0  | 1.0  | 22.7 | NA | NA | hypothetical protein |
| b3473 CDS predicted                            | 2.5  | 0.5  | 22.7 | NA | NA | hypothetical protein |
| BFvch464478 CDS hypothetical                   | 2.5  | 0.5  | 22.7 | NA | NA | hypothetical protein |
| TS28Rum01638 CDS CDS                           | 2.5  | 0.5  | 22.7 | NA | NA | hypothetical protein |
| BDI2121 CDS uncharacterized                    | 5.0  | 1.0  | 22.7 | NA | NA | hypothetical protein |
| BDI1730 CDS putative                           | 5.0  | 1.0  | 22.7 | NA | NA | hypothetical protein |
| TS28Rum08484 CDS CDS                           | 2.5  | 0.5  | 22.7 | NA | NA | hypothetical protein |
| TS29Col0581 CDS CDS                            | 5.0  | 1.0  | 22.7 | NA | NA | hypothetical protein |
| BFnctc1665 CDS hypothetical                    | 2.5  | 0.5  | 22.7 | NA | NA | hypothetical protein |
| BFnctc4030 CDS glutamyl-tRNA                   | 2.5  | 0.5  | 22.7 | NA | NA | hypothetical protein |
| Dfor0626 CDS CDS                               | 20.0 | 4.0  | 22.7 | NA | NA | hypothetical protein |
| TS29Rum18454 CDS CDS                           | 10.0 | 2.0  | 22.7 | NA | NA | hypothetical protein |
| BFnctc3052 CDS transcription                   | 5.0  | 1.0  | 22.7 | NA | NA | hypothetical protein |
| b2547 CDS fused                                | 10.0 | 2.0  | 22.7 | NA | NA | hypothetical protein |
| TS29Bac03818 CDS CDS                           | 20.0 | 4.0  | 22.7 | NA | NA | hypothetical protein |
| TS29Bac02857 CDS CDS                           | 2.5  | 0.5  | 22.7 | NA | NA | hypothetical protein |
| BFvch461199 CDS putative                       | 2.5  | 0.5  | 22.7 | NA | NA | hypothetical protein |
| BDI0488 CDS putative                           | 5.0  | 1.0  | 22.7 | NA | NA | hypothetical protein |
| TS29Clo3169 CDS CDS                            | 5.0  | 1.0  | 22.7 | NA | NA | hypothetical protein |
| BFvch460962 CDS putative                       | 2.5  | 0.5  | 22.7 | NA | NA | hypothetical protein |
| BFvch461573 CDS hypothetical                   | 2.5  | 0.5  | 22.7 | NA | NA | hypothetical protein |
| BFnctc3393 CDS hypothetical                    | 5.0  | 1.0  | 22.7 | NA | NA | hypothetical protein |
| BDI0072 CDS putative                           | 5.0  | 1.0  | 22.7 | NA | NA | hypothetical protein |
| BFnctc4164 CDS 4-hydroxy-3-methylbut-2-en-1-yl | 2.5  | 0.5  | 22.7 | NA | NA | hypothetical protein |
| M23Apeg3590 CDS hypothetical                   | 5.0  | 1.0  | 22.7 | NA | NA | hypothetical protein |
| Begg1010 CDS CDS                               | 2.5  | 0.5  | 22.7 | NA | NA | hypothetical protein |
| Clep0607 CDS CDS                               | 2.5  | 0.5  | 22.7 | NA | NA | hypothetical protein |
| TS29Par352 CDS CDS                             | 2.5  | 0.5  | 22.7 | NA | NA | hypothetical protein |
| BLDI581 CDS 2-keto-4-pentenoate                | 1.3  | 0.3  | 22.7 | NA | NA | hypothetical protein |

|                                          |       |      |      |    |    |                      |
|------------------------------------------|-------|------|------|----|----|----------------------|
| BFych463530/CDS/putative                 | 2.5   | 0.5  | 22.7 | NA | NA | hypothetical protein |
| TS29Dor2149/CDS/CDS                      | 5.0   | 1.0  | 22.7 | NA | NA | hypothetical protein |
| Rgna1524/CDS/CDS                         | 5.0   | 1.0  | 22.7 | NA | NA | hypothetical protein |
| BFych461657/CDS/hypothetical             | 2.5   | 0.5  | 22.7 | NA | NA | hypothetical protein |
| TS28Ali1906/CDS/CDS                      | 5.0   | 1.0  | 22.7 | NA | NA | hypothetical protein |
| TS28Rum04611/CDS/CDS                     | 5.0   | 1.0  | 22.7 | NA | NA | hypothetical protein |
| BDI2357/CDS/30S                          | 5.0   | 1.0  | 22.7 | NA | NA | hypothetical protein |
| BactD13755/CDS/CDS                       | 2.5   | 0.5  | 22.7 | NA | NA | hypothetical protein |
| TS29Rum21176/CDS/CDS                     | 5.0   | 1.0  | 22.7 | NA | NA | hypothetical protein |
| BFnctc1698/CDS/putative                  | 2.5   | 0.5  | 22.7 | NA | NA | hypothetical protein |
| BDI2195/CDS/hypothetical                 | 5.0   | 1.0  | 22.7 | NA | NA | hypothetical protein |
| TS29Rum02734/CDS/CDS                     | 5.0   | 1.0  | 22.7 | NA | NA | hypothetical protein |
| BDI0099/CDS/hypothetical                 | 10.0  | 2.0  | 22.7 | NA | NA | hypothetical protein |
| BFych464160/CDS/methionine               | 5.0   | 1.0  | 22.7 | NA | NA | hypothetical protein |
| Rumhvd3688/CDS/CDS                       | 5.0   | 1.0  | 22.7 | NA | NA | hypothetical protein |
| TS29Fae03719/CDS/CDS                     | 5.0   | 1.0  | 22.7 | NA | NA | hypothetical protein |
| TS29Dor1169/CDS/CDS                      | 5.0   | 1.0  | 22.7 | NA | NA | hypothetical protein |
| BDI3690/CDS/hypothetical                 | 5.0   | 1.0  | 22.7 | NA | NA | hypothetical protein |
| b2800/CDS/L-fucose-1-phosphate           | 5.0   | 1.0  | 22.7 | NA | NA | hypothetical protein |
| Robe3513/CDS/CDS                         | 5.0   | 1.0  | 22.7 | NA | NA | hypothetical protein |
| BFych461691/CDS/hypothetical             | 2.5   | 0.5  | 22.7 | NA | NA | hypothetical protein |
| TS28C1o04778/CDS/CDS                     | 5.0   | 1.0  | 22.7 | NA | NA | hypothetical protein |
| BDI3799/CDS/hypothetical                 | 5.0   | 1.0  | 22.7 | NA | NA | hypothetical protein |
| TS28Rum05914/CDS/CDS                     | 10.0  | 2.0  | 22.7 | NA | NA | hypothetical protein |
| TS29Rum11525/CDS/CDS                     | 10.0  | 2.0  | 22.7 | NA | NA | hypothetical protein |
| TS28Fae16577/CDS/CDS                     | 5.0   | 1.0  | 22.7 | NA | NA | hypothetical protein |
| Bum1274/CDS/CDS                          | 2.5   | 0.5  | 22.7 | NA | NA | hypothetical protein |
| Cbo10250/CDS/CDS                         | 5.0   | 1.0  | 22.7 | NA | NA | hypothetical protein |
| TS28Rum05667/CDS/CDS                     | 5.0   | 1.0  | 22.7 | NA | NA | hypothetical protein |
| Bfin3199/CDS/CDS                         | 5.0   | 1.0  | 22.7 | NA | NA | hypothetical protein |
| TS28RumUnc0148/CDS/CDS                   | 5.0   | 1.0  | 22.7 | NA | NA | hypothetical protein |
| BFnctc3791/CDS/putative                  | 7.5   | 1.5  | 22.7 | NA | NA | hypothetical protein |
| TS29Fae02437/CDS/CDS                     | 15.0  | 3.0  | 22.7 | NA | NA | hypothetical protein |
| TS28Fae00495/CDS/CDS                     | 7.5   | 1.5  | 22.7 | NA | NA | hypothetical protein |
| BDI3533/CDS/transcription                | 15.0  | 3.0  | 22.7 | NA | NA | hypothetical protein |
| TS29Fae00359/CDS/CDS                     | 7.5   | 1.5  | 22.7 | NA | NA | hypothetical protein |
| BDI3383/CDS[enoyl-[acyl-carrier-protein] | 15.0  | 3.0  | 22.7 | NA | NA | hypothetical protein |
| Bxyl0016/CDS/CDS                         | 15.0  | 3.0  | 22.7 | NA | NA | hypothetical protein |
| Aput0871/CDS/CDS                         | 15.0  | 3.0  | 22.7 | NA | NA | hypothetical protein |
| BDI1515/CDS/hypothetical                 | 15.0  | 3.0  | 22.7 | NA | NA | hypothetical protein |
| TS29Rum17529/CDS/CDS                     | 7.5   | 1.5  | 22.7 | NA | NA | hypothetical protein |
| BFnctc2761/CDS/putative                  | 15.0  | 3.0  | 22.7 | NA | NA | hypothetical protein |
| TS29Fae07330/CDS/CDS                     | 7.5   | 1.5  | 22.7 | NA | NA | hypothetical protein |
| TS28Bac2609/CDS/CDS                      | 3.3   | 0.7  | 22.7 | NA | NA | hypothetical protein |
| BFych463034/CDS/hypothetical             | 9.9   | 2.0  | 22.5 | NA | NA | hypothetical protein |
| BT1958/CDS/hypothetical                  | 9.9   | 2.0  | 22.5 | NA | NA | hypothetical protein |
| BFnctc3138/CDS/fructose-bisphosphate     | 16.5  | 3.3  | 22.5 | NA | NA | hypothetical protein |
| BFnctc0219/CDS/translation               | 14.8  | 3.0  | 22.4 | NA | NA | hypothetical protein |
| BactD10051/CDS/CDS                       | 2.5   | 0.5  | 22.4 | NA | NA | hypothetical protein |
| BLD1723/CDS/Ribosomal                    | 2.5   | 0.5  | 22.2 | NA | NA | hypothetical protein |
| TS29Rum00140/CDS/CDS                     | 122.0 | 25.0 | 22.2 | NA | NA | hypothetical protein |
| Bspl162556/CDS/CDS                       | 9.8   | 2.0  | 22.1 | NA | NA | hypothetical protein |
| Bspl162031/CDS/CDS                       | 0.7   | 0.1  | 22.0 | NA | NA | hypothetical protein |
| Bum0341/CDS/CDS                          | 2.4   | 0.5  | 21.9 | NA | NA | hypothetical protein |
| Ccom1704/CDS/CDS                         | 19.3  | 4.0  | 21.9 | NA | NA | hypothetical protein |
| BFych461217/CDS/hypothetical             | 4.8   | 1.0  | 21.9 | NA | NA | hypothetical protein |
| BFnctc4015/CDS/DNA-directed              | 24.2  | 5.0  | 21.9 | NA | NA | hypothetical protein |
| TS28Rum02365/CDS/CDS                     | 12.0  | 2.5  | 21.8 | NA | NA | hypothetical protein |
| Robe3564/CDS/CDS                         | 24.0  | 5.0  | 21.8 | NA | NA | hypothetical protein |
| TS28Rum14880/CDS/CDS                     | 21.5  | 4.5  | 21.7 | NA | NA | hypothetical protein |
| TS29Rum16475/CDS/CDS                     | 14.3  | 3.0  | 21.7 | NA | NA | hypothetical protein |
| BFnctc3243/CDS/adenylosuccinate          | 4.8   | 1.0  | 21.7 | NA | NA | hypothetical protein |
| BT2631/CDS/putative                      | 2.4   | 0.5  | 21.6 | NA | NA | hypothetical protein |
| BDI1271/CDS/serine                       | 19.0  | 4.0  | 21.6 | NA | NA | hypothetical protein |
| FpraM2120128/CDS/CDS                     | 9.5   | 2.0  | 21.6 | NA | NA | hypothetical protein |
| Bum12619/CDS/CDS                         | 19.8  | 4.2  | 21.5 | NA | NA | hypothetical protein |
| Robe0609/CDS/CDS                         | 42.5  | 9.0  | 21.4 | NA | NA | hypothetical protein |
| BFnctc4004/CDS/30S                       | 2.4   | 0.5  | 21.4 | NA | NA | hypothetical protein |
| BDI1854/CDS/AAA-metalloprotease          | 33.0  | 7.0  | 21.4 | NA | NA | hypothetical protein |
| BFych462020/CDS/hypothetical             | 14.1  | 3.0  | 21.4 | NA | NA | hypothetical protein |
| Bxyl2888/CDS/CDS                         | 6.3   | 1.3  | 21.3 | NA | NA | hypothetical protein |
| TS29Bac02765/CDS/CDS                     | 23.4  | 5.0  | 21.2 | NA | NA | hypothetical protein |
| FpraM2120521/CDS/CDS                     | 4.7   | 1.0  | 21.2 | NA | NA | hypothetical protein |
| BFych460188/CDS/UDP-N-acetylglucosamine  | 4.7   | 1.0  | 21.2 | NA | NA | hypothetical protein |
| BDI1397/CDS/ATP-dependent                | 14.0  | 3.0  | 21.2 | NA | NA | hypothetical protein |
| TS28Fae21330/CDS/CDS                     | 2.3   | 0.5  | 21.2 | NA | NA | hypothetical protein |
| Msm0202/CDS/translation                  | 3.5   | 0.8  | 21.2 | NA | NA | hypothetical protein |
| BFnctc0714/CDS/hypothetical              | 14.0  | 3.0  | 21.2 | NA | NA | hypothetical protein |
| Aput1932/CDS/CDS                         | 28.0  | 6.0  | 21.2 | NA | NA | hypothetical protein |
| TS28Bac0366/CDS/CDS                      | 2.3   | 0.5  | 21.2 | NA | NA | hypothetical protein |
| BDI0672/CDS/phosphoglycerate             | 14.0  | 3.0  | 21.2 | NA | NA | hypothetical protein |
| TS29Rum03193/CDS/CDS                     | 14.0  | 3.0  | 21.2 | NA | NA | hypothetical protein |
| Bxyl2186/CDS/CDS                         | 9.3   | 2.0  | 21.2 | NA | NA | hypothetical protein |
| Ehal1623/CDS/CDS                         | 2.3   | 0.5  | 21.2 | NA | NA | hypothetical protein |
| Bfra31120443/CDS/CDS                     | 2.3   | 0.5  | 21.2 | NA | NA | hypothetical protein |
| Clep0205/CDS/CDS                         | 34.2  | 7.3  | 21.2 | NA | NA | hypothetical protein |
| TS29Rum17007/CDS/CDS                     | 64.8  | 14.0 | 21.0 | NA | NA | hypothetical protein |
| Ccom1703/CDS/CDS                         | 23.0  | 5.0  | 20.9 | NA | NA | hypothetical protein |
| BDI0507/CDS/hypothetical                 | 23.0  | 5.0  | 20.9 | NA | NA | hypothetical protein |
| TS29Rum18034/CDS/CDS                     | 23.0  | 5.0  | 20.9 | NA | NA | hypothetical protein |
| TS29Rum14197/CDS/CDS                     | 23.0  | 5.0  | 20.9 | NA | NA | hypothetical protein |
| TS28Fae07391/CDS/CDS                     | 11.5  | 2.5  | 20.9 | NA | NA | hypothetical protein |
| BFnctc3998/CDS/50S                       | 6.9   | 1.5  | 20.8 | NA | NA | hypothetical protein |
| BFnctc3111/CDS/hypothetical              | 16.0  | 3.5  | 20.8 | NA | NA | hypothetical protein |

|                                  |      |      |      |    |    |                      |
|----------------------------------|------|------|------|----|----|----------------------|
| TS28RumUnc1234/CDS/CDS           | 16.0 | 3.5  | 20.8 | NA | NA | hypothetical protein |
| TS29Bac02770/CDS/CDS             | 16.8 | 3.7  | 20.7 | NA | NA | hypothetical protein |
| Bum0214/CDS/CDS                  | 38.5 | 8.5  | 20.6 | NA | NA | hypothetical protein |
| BactD11684/CDS/CDS               | 4.9  | 1.1  | 20.5 | NA | NA | hypothetical protein |
| TS29Fae03990/CDS/CDS             | 49.7 | 11.0 | 20.5 | NA | NA | hypothetical protein |
| Msm1413/CDS/tungsten             | 8.1  | 1.8  | 20.5 | NA | NA | hypothetical protein |
| TS29Bac07473/CDS/CDS             | 13.5 | 3.0  | 20.5 | NA | NA | hypothetical protein |
| TS29Rum05541/CDS/CDS             | 3.0  | 0.7  | 20.4 | NA | NA | hypothetical protein |
| TS28Met1060/CDS/CDS              | 1.5  | 0.3  | 20.4 | NA | NA | hypothetical protein |
| stu1596/CDS/cation-P-type        | 1.5  | 0.3  | 20.4 | NA | NA | hypothetical protein |
| stu0252/CDS/diaminopimelate      | 1.5  | 0.3  | 20.4 | NA | NA | hypothetical protein |
| stu1569/CDS/CorA                 | 3.0  | 0.7  | 20.4 | NA | NA | hypothetical protein |
| str1596/CDS/cation               | 1.5  | 0.3  | 20.4 | NA | NA | hypothetical protein |
| str1569/CDS/cation               | 3.0  | 0.7  | 20.4 | NA | NA | hypothetical protein |
| TS28Fae18233/CDS/CDS             | 4.5  | 1.0  | 20.4 | NA | NA | hypothetical protein |
| TS29Fae03420/CDS/CDS             | 9.0  | 2.0  | 20.4 | NA | NA | hypothetical protein |
| TS29Bac01551/CDS/CDS             | 9.0  | 2.0  | 20.4 | NA | NA | hypothetical protein |
| Aput1501/CDS/CDS                 | 4.5  | 1.0  | 20.4 | NA | NA | hypothetical protein |
| TS29Rum04206/CDS/CDS             | 4.5  | 1.0  | 20.4 | NA | NA | hypothetical protein |
| Rbro0857/CDS/CDS                 | 9.0  | 2.0  | 20.4 | NA | NA | hypothetical protein |
| BDI3914/CDS/conserved            | 9.0  | 2.0  | 20.4 | NA | NA | hypothetical protein |
| Bova3371/CDS/CDS                 | 4.5  | 1.0  | 20.4 | NA | NA | hypothetical protein |
| BDI0792/CDS/sulfite              | 18.0 | 4.0  | 20.4 | NA | NA | hypothetical protein |
| TS29Bac08223/CDS/CDS             | 9.0  | 2.0  | 20.4 | NA | NA | hypothetical protein |
| TS28Fae22735/CDS/CDS             | 4.5  | 1.0  | 20.4 | NA | NA | hypothetical protein |
| BDI1474/CDS/hypothetical         | 9.0  | 2.0  | 20.4 | NA | NA | hypothetical protein |
| TS29Clo4791/CDS/CDS              | 9.0  | 2.0  | 20.4 | NA | NA | hypothetical protein |
| Dlon2487/CDS/CDS                 | 4.5  | 1.0  | 20.4 | NA | NA | hypothetical protein |
| TS29Coi0157/CDS/CDS              | 4.5  | 1.0  | 20.4 | NA | NA | hypothetical protein |
| BDI1400/CDS/hypothetical         | 18.0 | 4.0  | 20.4 | NA | NA | hypothetical protein |
| TS28Fae09488/CDS/CDS             | 18.0 | 4.0  | 20.4 | NA | NA | hypothetical protein |
| TS29Par386/CDS/CDS               | 4.5  | 1.0  | 20.4 | NA | NA | hypothetical protein |
| TS29Fae09384/CDS/CDS             | 9.0  | 2.0  | 20.4 | NA | NA | hypothetical protein |
| BLD1558/CDS/SalY-type            | 2.3  | 0.5  | 20.4 | NA | NA | hypothetical protein |
| BDI1548/CDS/TonB-like            | 9.0  | 2.0  | 20.4 | NA | NA | hypothetical protein |
| TS29Rum17853/CDS/CDS             | 9.0  | 2.0  | 20.4 | NA | NA | hypothetical protein |
| TS29Bac11570/CDS/CDS             | 18.0 | 4.0  | 20.4 | NA | NA | hypothetical protein |
| TS28Rum03410/CDS/CDS             | 4.5  | 1.0  | 20.4 | NA | NA | hypothetical protein |
| BDI1829/CDS/bifunctional         | 18.0 | 4.0  | 20.4 | NA | NA | hypothetical protein |
| TS29Rum15436/CDS/CDS             | 9.0  | 2.0  | 20.4 | NA | NA | hypothetical protein |
| BDI1291/CDS/hypothetical         | 9.0  | 2.0  | 20.4 | NA | NA | hypothetical protein |
| Rtor1158/CDS/CDS                 | 4.5  | 1.0  | 20.4 | NA | NA | hypothetical protein |
| Acae2900/CDS/CDS                 | 9.0  | 2.0  | 20.4 | NA | NA | hypothetical protein |
| Bste1256/CDS/CDS                 | 2.3  | 0.5  | 20.4 | NA | NA | hypothetical protein |
| Aput1132/CDS/CDS                 | 9.0  | 2.0  | 20.4 | NA | NA | hypothetical protein |
| BDI3815/CDS/hypothetical         | 9.0  | 2.0  | 20.4 | NA | NA | hypothetical protein |
| BDI3489/CDS/30S                  | 13.5 | 3.0  | 20.4 | NA | NA | hypothetical protein |
| Bum0293/CDS/CDS                  | 53.2 | 11.8 | 20.4 | NA | NA | hypothetical protein |
| BDI2805/CDS/phosphoenolpyruvate  | 40.3 | 9.0  | 20.3 | NA | NA | hypothetical protein |
| TS29Fae08622/CDS/CDS             | 49.0 | 11.0 | 20.2 | NA | NA | hypothetical protein |
| Msm0999/CDS/methyl               | 16.3 | 3.7  | 20.2 | NA | NA | hypothetical protein |
| BFvch464165/CDS/50S              | 11.1 | 2.5  | 20.2 | NA | NA | hypothetical protein |
| BFnctc3987/CDS/50S               | 11.1 | 2.5  | 20.2 | NA | NA | hypothetical protein |
| BactD24581/CDS/CDS               | 2.2  | 0.5  | 20.1 | NA | NA | hypothetical protein |
| TS29Bac05519/CDS/CDS             | 31.0 | 7.0  | 20.1 | NA | NA | hypothetical protein |
| BFvch462742/CDS/rRNA             | 4.4  | 1.0  | 20.1 | NA | NA | hypothetical protein |
| BFnctc2759/CDS/putative          | 4.4  | 1.0  | 20.1 | NA | NA | hypothetical protein |
| Bum1133/CDS/CDS                  | 8.8  | 2.0  | 20.1 | NA | NA | hypothetical protein |
| TS29Bac07251/CDS/CDS             | 17.7 | 4.0  | 20.1 | NA | NA | hypothetical protein |
| Msm0438/CDS/vacuolar-type        | 2.4  | 0.5  | 20.0 | NA | NA | hypothetical protein |
| TS29Par766/CDS/CDS               | 88.1 | 20.0 | 20.0 | NA | NA | hypothetical protein |
| Msm1750581/CDS/CDS               | 1.5  | 0.3  | 20.0 | NA | NA | hypothetical protein |
| TS28Met0711/CDS/CDS              | 1.5  | 0.3  | 20.0 | NA | NA | hypothetical protein |
| BactD20051/CDS/CDS               | 2.2  | 0.5  | 20.0 | NA | NA | hypothetical protein |
| BL0751/CDS/ATP                   | 2.2  | 0.5  | 20.0 | NA | NA | hypothetical protein |
| TS29Fae08380/CDS/CDS             | 11.0 | 2.5  | 20.0 | NA | NA | hypothetical protein |
| BDI2356/CDS/30S                  | 11.0 | 2.5  | 20.0 | NA | NA | hypothetical protein |
| Bova0737/CDS/CDS                 | 2.2  | 0.5  | 20.0 | NA | NA | hypothetical protein |
| TS29Rum21191/CDS/CDS             | 37.0 | 8.5  | 19.8 | NA | NA | hypothetical protein |
| BL1101/CDS/hypothetical          | 95.5 | 22.0 | 19.7 | NA | NA | hypothetical protein |
| FpraM2122061/CDS/CDS             | 69.4 | 16.0 | 19.7 | NA | NA | hypothetical protein |
| Clep0216/CDS/CDS                 | 6.5  | 1.5  | 19.7 | NA | NA | hypothetical protein |
| TS29Par417/CDS/CDS               | 6.5  | 1.5  | 19.7 | NA | NA | hypothetical protein |
| TS29Rum00755/CDS/CDS             | 13.0 | 3.0  | 19.7 | NA | NA | hypothetical protein |
| TS29Par319/CDS/CDS               | 13.0 | 3.0  | 19.7 | NA | NA | hypothetical protein |
| TS29Bac08806/CDS/CDS             | 13.0 | 3.0  | 19.7 | NA | NA | hypothetical protein |
| TS28Clo03058/CDS/CDS             | 13.0 | 3.0  | 19.7 | NA | NA | hypothetical protein |
| Clep2099/CDS/CDS                 | 13.0 | 3.0  | 19.7 | NA | NA | hypothetical protein |
| BDI1098/CDS/Xaa-Pro              | 13.0 | 3.0  | 19.7 | NA | NA | hypothetical protein |
| BDI0940/CDS/carboxynorspermidine | 13.0 | 3.0  | 19.7 | NA | NA | hypothetical protein |
| TS28Clo02774/CDS/CDS             | 65.0 | 15.0 | 19.7 | NA | NA | hypothetical protein |
| Msm1750379/CDS/CDS               | 1.1  | 0.3  | 19.7 | NA | NA | hypothetical protein |
| BDI2378/CDS/50S                  | 4.3  | 1.0  | 19.7 | NA | NA | hypothetical protein |
| Msm1411/CDS/tungsten             | 4.3  | 1.0  | 19.5 | NA | NA | hypothetical protein |
| BL0549/CDS/adenylosuccinate      | 2.2  | 0.5  | 19.5 | NA | NA | hypothetical protein |
| BDI1031/CDS/pyruvate             | 30.0 | 7.0  | 19.5 | NA | NA | hypothetical protein |
| BFnctc3437/CDS/glutamate         | 15.0 | 3.5  | 19.5 | NA | NA | hypothetical protein |
| FpraM2120613/CDS/CDS             | 47.8 | 11.2 | 19.4 | NA | NA | hypothetical protein |
| FpraM2120129/CDS/CDS             | 47.8 | 11.2 | 19.4 | NA | NA | hypothetical protein |
| Msm0621/CDS/acidic               | 5.0  | 1.2  | 19.4 | NA | NA | hypothetical protein |
| BFvch464485/CDS/hypothetical     | 17.0 | 4.0  | 19.3 | NA | NA | hypothetical protein |
| Aput0210/CDS/CDS                 | 8.5  | 2.0  | 19.3 | NA | NA | hypothetical protein |
| BDI2646/CDS/hypothetical         | 17.0 | 4.0  | 19.3 | NA | NA | hypothetical protein |
| Bum1273/CDS/CDS                  | 8.5  | 2.0  | 19.3 | NA | NA | hypothetical protein |
| Aput0206/CDS/CDS                 | 8.5  | 2.0  | 19.3 | NA | NA | hypothetical protein |
| BL1582/CDS/30S                   | 1.1  | 0.3  | 19.2 | NA | NA | hypothetical protein |



|                                        |       |      |      |    |    |                      |
|----------------------------------------|-------|------|------|----|----|----------------------|
| BLD171 CDS Ribosomal                   | 1.1   | 0.3  | 19.2 | NA | NA | hypothetical protein |
| TS28Fae16376 CDS CDS                   | 12.7  | 3.0  | 19.2 | NA | NA | hypothetical protein |
| Bden1243 CDS CDS                       | 2.1   | 0.5  | 19.1 | NA | NA | hypothetical protein |
| BFnctc4129 CDS polynucleotide          | 10.5  | 2.5  | 19.1 | NA | NA | hypothetical protein |
| TS28Fae02282 CDS CDS                   | 21.0  | 5.0  | 19.1 | NA | NA | hypothetical protein |
| BFvch462412 CDS TPR                    | 10.5  | 2.5  | 19.1 | NA | NA | hypothetical protein |
| BT2700 CDS SOS                         | 4.2   | 1.0  | 19.1 | NA | NA | hypothetical protein |
| TS29Fae00241 CDS CDS                   | 12.5  | 3.0  | 18.9 | NA | NA | hypothetical protein |
| BDI0163 CDS methylmalonyl-CoA          | 25.0  | 6.0  | 18.9 | NA | NA | hypothetical protein |
| Bfin0932 CDS CDS                       | 6.0   | 1.5  | 18.8 | NA | NA | hypothetical protein |
| BFvch464551 CDS fumarate               | 1.4   | 0.3  | 18.8 | NA | NA | hypothetical protein |
| BactD11211 CDS CDS                     | 5.5   | 1.3  | 18.7 | NA | NA | hypothetical protein |
| BDI3033 CDS L-aspartate                | 20.5  | 5.0  | 18.6 | NA | NA | hypothetical protein |
| BDI3816 CDS putative                   | 20.5  | 5.0  | 18.6 | NA | NA | hypothetical protein |
| BFnctc0179 CDS putative                | 2.0   | 0.5  | 18.5 | NA | NA | hypothetical protein |
| BFvch460220 CDS acyl                   | 2.0   | 0.5  | 18.5 | NA | NA | hypothetical protein |
| BDI1517 CDS putative                   | 57.0  | 14.0 | 18.5 | NA | NA | hypothetical protein |
| Msm1117 CDS cobalamin                  | 59.0  | 14.5 | 18.5 | NA | NA | hypothetical protein |
| TS29Rum04348 CDS CDS                   | 107.3 | 26.5 | 18.4 | NA | NA | hypothetical protein |
| Bova0264 CDS CDS                       | 4.0   | 1.0  | 18.3 | NA | NA | hypothetical protein |
| BactD23742 CDS CDS                     | 4.0   | 1.0  | 18.3 | NA | NA | hypothetical protein |
| BFvch464192 CDS DNA-directed           | 24.2  | 6.0  | 18.3 | NA | NA | hypothetical protein |
| TS28Clo00205 CDS CDS                   | 5.4   | 1.3  | 18.3 | NA | NA | hypothetical protein |
| BFvch462850 CDS putative               | 64.5  | 16.1 | 18.2 | NA | NA | hypothetical protein |
| TS28Bac6125 CDS CDS                    | 2.0   | 0.5  | 18.2 | NA | NA | hypothetical protein |
| Bsp1162035 CDS CDS                     | 0.3   | 0.1  | 18.2 | NA | NA | hypothetical protein |
| TS29Bac02077 CDS CDS                   | 28.0  | 7.0  | 18.2 | NA | NA | hypothetical protein |
| BFvch463273 CDS hypothetical           | 14.0  | 3.5  | 18.2 | NA | NA | hypothetical protein |
| BFvch463635 CDS glutamate              | 14.0  | 3.5  | 18.2 | NA | NA | hypothetical protein |
| TS28Fae21577 CDS CDS                   | 14.0  | 3.5  | 18.2 | NA | NA | hypothetical protein |
| BDI1124 CDS Na(+)-translocating        | 4.0   | 1.0  | 18.2 | NA | NA | hypothetical protein |
| BFvch462230 CDS putative               | 6.0   | 1.5  | 18.2 | NA | NA | hypothetical protein |
| TS28Rum13322 CDS CDS                   | 2.0   | 0.5  | 18.2 | NA | NA | hypothetical protein |
| Cbol4716 CDS CDS                       | 4.0   | 1.0  | 18.2 | NA | NA | hypothetical protein |
| TS28Fae13123 CDS CDS                   | 2.0   | 0.5  | 18.2 | NA | NA | hypothetical protein |
| Clep0351 CDS CDS                       | 4.0   | 1.0  | 18.2 | NA | NA | hypothetical protein |
| TS28Fae00262 CDS CDS                   | 2.0   | 0.5  | 18.2 | NA | NA | hypothetical protein |
| TS29Rum03712 CDS CDS                   | 4.0   | 1.0  | 18.2 | NA | NA | hypothetical protein |
| BDI0313 CDS hypothetical               | 8.0   | 2.0  | 18.2 | NA | NA | hypothetical protein |
| BDI3843 CDS hypothetical               | 8.0   | 2.0  | 18.2 | NA | NA | hypothetical protein |
| Ehal2607 CDS CDS                       | 2.0   | 0.5  | 18.2 | NA | NA | hypothetical protein |
| Bxyl2835 CDS CDS                       | 4.0   | 1.0  | 18.2 | NA | NA | hypothetical protein |
| BFvch463959 CDS putative               | 2.0   | 0.5  | 18.2 | NA | NA | hypothetical protein |
| BFvch463178 CDS putative               | 4.0   | 1.0  | 18.2 | NA | NA | hypothetical protein |
| TS28Col0078 CDS CDS                    | 8.0   | 2.0  | 18.2 | NA | NA | hypothetical protein |
| TS28Rum06435 CDS CDS                   | 6.0   | 1.5  | 18.2 | NA | NA | hypothetical protein |
| TS28Fae12104 CDS CDS                   | 4.0   | 1.0  | 18.2 | NA | NA | hypothetical protein |
| TS29Rum03308 CDS CDS                   | 4.0   | 1.0  | 18.2 | NA | NA | hypothetical protein |
| TS28Rum05635 CDS CDS                   | 4.0   | 1.0  | 18.2 | NA | NA | hypothetical protein |
| BFvch462632 CDS hypothetical           | 2.0   | 0.5  | 18.2 | NA | NA | hypothetical protein |
| TS29Rum08493 CDS CDS                   | 4.0   | 1.0  | 18.2 | NA | NA | hypothetical protein |
| Fpram2120876 CDS CDS                   | 4.0   | 1.0  | 18.2 | NA | NA | hypothetical protein |
| TS29Fae05286 CDS CDS                   | 4.0   | 1.0  | 18.2 | NA | NA | hypothetical protein |
| TS28Rum09716 CDS CDS                   | 4.0   | 1.0  | 18.2 | NA | NA | hypothetical protein |
| BDI3377 CDS ribosome-associated        | 8.0   | 2.0  | 18.2 | NA | NA | hypothetical protein |
| TS28Clo07310 CDS CDS                   | 8.0   | 2.0  | 18.2 | NA | NA | hypothetical protein |
| HPAG10815 CDS inositol-5-monophosphate | 4.0   | 1.0  | 18.2 | NA | NA | hypothetical protein |
| BDI2355 CDS 3OS                        | 2.0   | 0.5  | 18.2 | NA | NA | hypothetical protein |
| BDI0987 CDS pyruvate                   | 8.0   | 2.0  | 18.2 | NA | NA | hypothetical protein |
| Fpram2120841 CDS CDS                   | 6.0   | 1.5  | 18.2 | NA | NA | hypothetical protein |
| Fpram2121307 CDS CDS                   | 2.0   | 0.5  | 18.2 | NA | NA | hypothetical protein |
| BFvch461325 CDS putative               | 2.0   | 0.5  | 18.2 | NA | NA | hypothetical protein |
| TS28Rum05381 CDS CDS                   | 4.0   | 1.0  | 18.2 | NA | NA | hypothetical protein |
| BFvch461583 CDS putative               | 2.0   | 0.5  | 18.2 | NA | NA | hypothetical protein |
| BFvch462294 CDS hypothetical           | 2.0   | 0.5  | 18.2 | NA | NA | hypothetical protein |
| BFvch460298 CDS 3OS                    | 2.0   | 0.5  | 18.2 | NA | NA | hypothetical protein |
| TS29Clo4224 CDS CDS                    | 4.0   | 1.0  | 18.2 | NA | NA | hypothetical protein |
| TS29Dor1170 CDS CDS                    | 12.0  | 3.0  | 18.2 | NA | NA | hypothetical protein |
| BFnctc4025 CDS 3OS                     | 2.0   | 0.5  | 18.2 | NA | NA | hypothetical protein |
| Aput1508 CDS CDS                       | 8.0   | 2.0  | 18.2 | NA | NA | hypothetical protein |
| TS29Clo3173 CDS CDS                    | 8.0   | 2.0  | 18.2 | NA | NA | hypothetical protein |
| BFnctc2383 CDS hypothetical            | 2.0   | 0.5  | 18.2 | NA | NA | hypothetical protein |
| TS28Clo04150 CDS CDS                   | 8.0   | 2.0  | 18.2 | NA | NA | hypothetical protein |
| TS29Aii429 CDS CDS                     | 2.0   | 0.5  | 18.2 | NA | NA | hypothetical protein |
| Rtor0190 CDS CDS                       | 4.0   | 1.0  | 18.2 | NA | NA | hypothetical protein |
| Aput1617 CDS CDS                       | 24.0  | 6.0  | 18.2 | NA | NA | hypothetical protein |
| TS29Clo3167 CDS CDS                    | 4.0   | 1.0  | 18.2 | NA | NA | hypothetical protein |
| TS29Fae09966 CDS CDS                   | 4.0   | 1.0  | 18.2 | NA | NA | hypothetical protein |
| BDI1119 CDS hypothetical               | 4.0   | 1.0  | 18.2 | NA | NA | hypothetical protein |
| M23Apeg1849 CDS hypothetical           | 4.0   | 1.0  | 18.2 | NA | NA | hypothetical protein |
| b2906 CDS predicted                    | 4.0   | 1.0  | 18.2 | NA | NA | hypothetical protein |
| TS28Fae19107 CDS CDS                   | 2.0   | 0.5  | 18.2 | NA | NA | hypothetical protein |
| TS28Clo04561 CDS CDS                   | 4.0   | 1.0  | 18.2 | NA | NA | hypothetical protein |
| BactD22375 CDS CDS                     | 4.0   | 1.0  | 18.2 | NA | NA | hypothetical protein |
| Bumi1825 CDS CDS                       | 2.0   | 0.5  | 18.2 | NA | NA | hypothetical protein |
| Rema0318 CDS CDS                       | 2.0   | 0.5  | 18.2 | NA | NA | hypothetical protein |
| Dfor0848 CDS CDS                       | 8.0   | 2.0  | 18.2 | NA | NA | hypothetical protein |
| b3056 CDS fused                        | 6.0   | 1.5  | 18.2 | NA | NA | hypothetical protein |
| b2049 CDS mannose-1-phosphate          | 2.0   | 0.5  | 18.2 | NA | NA | hypothetical protein |
| BFvch460528 CDS acetyl-coenzyme        | 2.0   | 0.5  | 18.2 | NA | NA | hypothetical protein |
| Bthe7335571 CDS CDS                    | 1.0   | 0.3  | 18.2 | NA | NA | hypothetical protein |
| Dfor1274 CDS CDS                       | 4.0   | 1.0  | 18.2 | NA | NA | hypothetical protein |
| TS28Clo05486 CDS CDS                   | 2.0   | 0.5  | 18.2 | NA | NA | hypothetical protein |
| BFvch463853 CDS methylglvioxal         | 2.0   | 0.5  | 18.2 | NA | NA | hypothetical protein |
| BFnctc2564 CDS putative                | 4.0   | 1.0  | 18.2 | NA | NA | hypothetical protein |

|                                        |      |     |      |    |    |                      |
|----------------------------------------|------|-----|------|----|----|----------------------|
| BFnctc3707/CDS/hypothetical            | 2.0  | 0.5 | 18.2 | NA | NA | hypothetical protein |
| Aput0171/CDS/CDS                       | 4.0  | 1.0 | 18.2 | NA | NA | hypothetical protein |
| Bthe3730719/CDS/CDS                    | 2.0  | 0.5 | 18.2 | NA | NA | hypothetical protein |
| BDI0477/CDS/UDP-N-acetylglucosamine    | 4.0  | 1.0 | 18.2 | NA | NA | hypothetical protein |
| TS28Fae01387/CDS/CDS                   | 12.0 | 3.0 | 18.2 | NA | NA | hypothetical protein |
| BFnctc1965/CDS/hypothetical            | 2.0  | 0.5 | 18.2 | NA | NA | hypothetical protein |
| TS29Fae04747/CDS/CDS                   | 4.0  | 1.0 | 18.2 | NA | NA | hypothetical protein |
| TS29Rum14704/CDS/CDS                   | 16.0 | 4.0 | 18.2 | NA | NA | hypothetical protein |
| TS28Clo05689/CDS/CDS                   | 8.0  | 2.0 | 18.2 | NA | NA | hypothetical protein |
| BFvch461820/CDS/hypothetical           | 1.0  | 0.3 | 18.2 | NA | NA | hypothetical protein |
| BDI3540/CDS/iglycoside                 | 16.0 | 4.0 | 18.2 | NA | NA | hypothetical protein |
| Cbo12263/CDS/CDS                       | 4.0  | 1.0 | 18.2 | NA | NA | hypothetical protein |
| FpraM2120130/CDS/CDS                   | 6.0  | 1.5 | 18.2 | NA | NA | hypothetical protein |
| BL1400/CDS/hypothetical                | 2.0  | 0.5 | 18.2 | NA | NA | hypothetical protein |
| BDI0928/CDS/Na+/H+                     | 4.0  | 1.0 | 18.2 | NA | NA | hypothetical protein |
| M23Apeg3634/CDS/3-hydroxybutyryl-CoA   | 4.0  | 1.0 | 18.2 | NA | NA | hypothetical protein |
| BDI1316/CDS/hypothetical               | 4.0  | 1.0 | 18.2 | NA | NA | hypothetical protein |
| BDI2097/CDS/phosphoglucosyltransferase | 16.0 | 4.0 | 18.2 | NA | NA | hypothetical protein |
| BFnctc2109/CDS/putative                | 2.0  | 0.5 | 18.2 | NA | NA | hypothetical protein |
| TS29Bac11758/CDS/CDS                   | 4.0  | 1.0 | 18.2 | NA | NA | hypothetical protein |
| b3026/CDS/sensorv                      | 4.0  | 1.0 | 18.2 | NA | NA | hypothetical protein |
| TS29Fae07802/CDS/CDS                   | 4.0  | 1.0 | 18.2 | NA | NA | hypothetical protein |
| BFnctc0455/CDS/orotate                 | 8.0  | 2.0 | 18.2 | NA | NA | hypothetical protein |
| BDI3125/CDS/putative                   | 4.0  | 1.0 | 18.2 | NA | NA | hypothetical protein |
| TS29Dor1496/CDS/CDS                    | 4.0  | 1.0 | 18.2 | NA | NA | hypothetical protein |
| Cbo15275/CDS/CDS                       | 4.0  | 1.0 | 18.2 | NA | NA | hypothetical protein |
| Bste2306/CDS/CDS                       | 4.0  | 1.0 | 18.2 | NA | NA | hypothetical protein |
| BDI3370/CDS/acetate                    | 12.0 | 3.0 | 18.2 | NA | NA | hypothetical protein |
| TS28Rum07612/CDS/CDS                   | 2.0  | 0.5 | 18.2 | NA | NA | hypothetical protein |
| TS29Rum01315/CDS/CDS                   | 8.0  | 2.0 | 18.2 | NA | NA | hypothetical protein |
| BDI0825/CDS/ATP                        | 12.0 | 3.0 | 18.2 | NA | NA | hypothetical protein |
| BDI1817/CDS/glycerol-3-phosphate       | 4.0  | 1.0 | 18.2 | NA | NA | hypothetical protein |
| TS29Bac12104/CDS/CDS                   | 4.0  | 1.0 | 18.2 | NA | NA | hypothetical protein |
| TS28Fae03748/CDS/CDS                   | 4.0  | 1.0 | 18.2 | NA | NA | hypothetical protein |
| BDI3098/CDS/putative                   | 4.0  | 1.0 | 18.2 | NA | NA | hypothetical protein |
| BDI2831/CDS/putative                   | 8.0  | 2.0 | 18.2 | NA | NA | hypothetical protein |
| TS29Rum16756/CDS/CDS                   | 2.0  | 0.5 | 18.2 | NA | NA | hypothetical protein |
| Robe3278/CDS/CDS                       | 6.0  | 1.5 | 18.2 | NA | NA | hypothetical protein |
| TS29Bac01101/CDS/CDS                   | 2.0  | 0.5 | 18.2 | NA | NA | hypothetical protein |
| BDI2059/CDS/3-isopropylmalate          | 4.0  | 1.0 | 18.2 | NA | NA | hypothetical protein |
| TS28RumUnc1535/CDS/CDS                 | 4.0  | 1.0 | 18.2 | NA | NA | hypothetical protein |
| BFvch464202/CDS/30S                    | 2.0  | 0.5 | 18.2 | NA | NA | hypothetical protein |
| BFnctc4365/CDS/translation-associated  | 2.0  | 0.5 | 18.2 | NA | NA | hypothetical protein |
| TS28Fub0234/CDS/CDS                    | 4.0  | 1.0 | 18.2 | NA | NA | hypothetical protein |
| TS29Rum18420/CDS/CDS                   | 8.0  | 2.0 | 18.2 | NA | NA | hypothetical protein |
| Bumi0158/CDS/CDS                       | 2.0  | 0.5 | 18.2 | NA | NA | hypothetical protein |
| EFER2728/CDS/exonuclease               | 4.0  | 1.0 | 18.2 | NA | NA | hypothetical protein |
| TS29Bac06953/CDS/CDS                   | 4.0  | 1.0 | 18.2 | NA | NA | hypothetical protein |
| TS29Rum17134/CDS/CDS                   | 12.0 | 3.0 | 18.2 | NA | NA | hypothetical protein |
| Bxyl3807/CDS/CDS                       | 2.0  | 0.5 | 18.2 | NA | NA | hypothetical protein |
| Clep1276/CDS/CDS                       | 4.0  | 1.0 | 18.2 | NA | NA | hypothetical protein |
| Acac0630/CDS/CDS                       | 4.0  | 1.0 | 18.2 | NA | NA | hypothetical protein |
| EUBREC0715/CDS/cell                    | 4.0  | 1.0 | 18.2 | NA | NA | hypothetical protein |
| M23Apeg1214/CDS/PTS                    | 4.0  | 1.0 | 18.2 | NA | NA | hypothetical protein |
| TS29Rum01635/CDS/CDS                   | 4.0  | 1.0 | 18.2 | NA | NA | hypothetical protein |
| TS28Bac1929/CDS/CDS                    | 2.0  | 0.5 | 18.2 | NA | NA | hypothetical protein |
| Clep0226/CDS/CDS                       | 4.0  | 1.0 | 18.2 | NA | NA | hypothetical protein |
| BDI3213/CDS/outer                      | 12.0 | 3.0 | 18.2 | NA | NA | hypothetical protein |
| Aput1464/CDS/CDS                       | 4.0  | 1.0 | 18.2 | NA | NA | hypothetical protein |
| Bste1244/CDS/CDS                       | 4.0  | 1.0 | 18.2 | NA | NA | hypothetical protein |
| BDI3414/CDS/galactoside                | 4.0  | 1.0 | 18.2 | NA | NA | hypothetical protein |
| BDI1482/CDS/hypothetical               | 4.0  | 1.0 | 18.2 | NA | NA | hypothetical protein |
| Aput0426/CDS/CDS                       | 8.0  | 2.0 | 18.2 | NA | NA | hypothetical protein |
| Aput1043/CDS/CDS                       | 4.0  | 1.0 | 18.2 | NA | NA | hypothetical protein |
| RintL13841/CDS/CDS                     | 4.0  | 1.0 | 18.2 | NA | NA | hypothetical protein |
| Bfra31123680/CDS/CDS                   | 8.0  | 2.0 | 18.2 | NA | NA | hypothetical protein |
| EUBREC2388/CDS/putative                | 2.0  | 0.5 | 18.2 | NA | NA | hypothetical protein |
| BDI1735/CDS/hypothetical               | 8.0  | 2.0 | 18.2 | NA | NA | hypothetical protein |
| BDI1428/CDS/transcriptional            | 8.0  | 2.0 | 18.2 | NA | NA | hypothetical protein |
| Dfor2477/CDS/CDS                       | 2.0  | 0.5 | 18.2 | NA | NA | hypothetical protein |
| BDI1288/CDS/hypothetical               | 4.0  | 1.0 | 18.2 | NA | NA | hypothetical protein |
| BactD20960/CDS/CDS                     | 4.0  | 1.0 | 18.2 | NA | NA | hypothetical protein |
| TS28Rum00786/CDS/CDS                   | 4.0  | 1.0 | 18.2 | NA | NA | hypothetical protein |
| BFnctc0387/CDS/putative                | 2.0  | 0.5 | 18.2 | NA | NA | hypothetical protein |
| TS28RumUnc0315/CDS/CDS                 | 4.0  | 1.0 | 18.2 | NA | NA | hypothetical protein |
| BDI1453/CDS/hypothetical               | 4.0  | 1.0 | 18.2 | NA | NA | hypothetical protein |
| b1510/CDS/predicted                    | 2.0  | 0.5 | 18.2 | NA | NA | hypothetical protein |
| BFnctc3624/CDS/methylglyoxal           | 2.0  | 0.5 | 18.2 | NA | NA | hypothetical protein |
| BFnctc2388/CDS/putative                | 2.0  | 0.5 | 18.2 | NA | NA | hypothetical protein |
| TS28Rum03208/CDS/CDS                   | 2.0  | 0.5 | 18.2 | NA | NA | hypothetical protein |
| TS28Fae18034/CDS/CDS                   | 4.0  | 1.0 | 18.2 | NA | NA | hypothetical protein |
| TS29Rum13369/CDS/CDS                   | 24.0 | 6.0 | 18.2 | NA | NA | hypothetical protein |
| BDI1218/CDS/hypothetical               | 8.0  | 2.0 | 18.2 | NA | NA | hypothetical protein |
| BLD0786/CDS/Threonine                  | 2.0  | 0.5 | 18.2 | NA | NA | hypothetical protein |
| TS28Rum13621/CDS/CDS                   | 4.0  | 1.0 | 18.2 | NA | NA | hypothetical protein |
| TS29Rum15202/CDS/CDS                   | 8.0  | 2.0 | 18.2 | NA | NA | hypothetical protein |
| Acac0958/CDS/CDS                       | 4.0  | 1.0 | 18.2 | NA | NA | hypothetical protein |
| BFnctc3620/CDS/putative                | 10.0 | 2.5 | 18.2 | NA | NA | hypothetical protein |
| TS29Fae04126/CDS/CDS                   | 4.0  | 1.0 | 18.2 | NA | NA | hypothetical protein |
| TS28Fae20274/CDS/CDS                   | 4.0  | 1.0 | 18.2 | NA | NA | hypothetical protein |
| Bumi0757/CDS/CDS                       | 2.0  | 0.5 | 18.2 | NA | NA | hypothetical protein |
| b2545/CDS/predicted                    | 4.0  | 1.0 | 18.2 | NA | NA | hypothetical protein |
| TS29Fae03250/CDS/CDS                   | 2.0  | 0.5 | 18.2 | NA | NA | hypothetical protein |
| TS28Fae02150/CDS/CDS                   | 4.0  | 1.0 | 18.2 | NA | NA | hypothetical protein |

|                                      |      |      |      |    |    |                      |
|--------------------------------------|------|------|------|----|----|----------------------|
| BDI0950/CDS/conserved                | 4.0  | 1.0  | 18.2 | NA | NA | hypothetical protein |
| TS29Fae07888/CDS/CDS                 | 4.0  | 1.0  | 18.2 | NA | NA | hypothetical protein |
| BFncct3018/CDS/putative              | 4.0  | 1.0  | 18.2 | NA | NA | hypothetical protein |
| BDI2609/CDS/putative                 | 2.0  | 0.5  | 18.2 | NA | NA | hypothetical protein |
| M23Apeg1351/CDS/LSU                  | 4.0  | 1.0  | 18.2 | NA | NA | hypothetical protein |
| BDI3774/CDS/glycoside                | 4.0  | 1.0  | 18.2 | NA | NA | hypothetical protein |
| Aput0425/CDS/CDS                     | 12.0 | 3.0  | 18.2 | NA | NA | hypothetical protein |
| BDI1303/CDS/redox-sensitive          | 4.0  | 1.0  | 18.2 | NA | NA | hypothetical protein |
| BDI2359/CDS/methionine               | 2.0  | 0.5  | 18.2 | NA | NA | hypothetical protein |
| TS28Ahl1376/CDS/CDS                  | 4.0  | 1.0  | 18.2 | NA | NA | hypothetical protein |
| TS29Fae04758/CDS/CDS                 | 4.0  | 1.0  | 18.2 | NA | NA | hypothetical protein |
| TS28Col1444/CDS/CDS                  | 4.0  | 1.0  | 18.2 | NA | NA | hypothetical protein |
| BactD20009/CDS/CDS                   | 1.0  | 0.3  | 18.2 | NA | NA | hypothetical protein |
| BFncct0247/CDS/30S                   | 2.0  | 0.5  | 18.2 | NA | NA | hypothetical protein |
| BDI3084/CDS/putative                 | 12.0 | 3.0  | 18.2 | NA | NA | hypothetical protein |
| Aput1894/CDS/CDS                     | 8.0  | 2.0  | 18.2 | NA | NA | hypothetical protein |
| BDI2257/CDS/gamma-glutamyl           | 4.0  | 1.0  | 18.2 | NA | NA | hypothetical protein |
| Bsp116255/CDS/CDS                    | 1.3  | 0.3  | 18.2 | NA | NA | hypothetical protein |
| TS29Rum09361/CDS/CDS                 | 1.3  | 0.3  | 18.2 | NA | NA | hypothetical protein |
| TS29Bac09613/CDS/CDS                 | 1.3  | 0.3  | 18.2 | NA | NA | hypothetical protein |
| BFych460255/CDS/L-fucose-1-phosphate | 1.3  | 0.3  | 18.2 | NA | NA | hypothetical protein |
| Bun0276/CDS/CDS                      | 1.3  | 0.3  | 18.2 | NA | NA | hypothetical protein |
| TS28Clo09615/CDS/CDS                 | 1.3  | 0.3  | 18.2 | NA | NA | hypothetical protein |
| BT4258/CDS/putative                  | 1.3  | 0.3  | 18.2 | NA | NA | hypothetical protein |
| BactD11867/CDS/CDS                   | 1.3  | 0.3  | 18.2 | NA | NA | hypothetical protein |
| BFncct0929/CDS/50S                   | 2.0  | 0.5  | 18.0 | NA | NA | hypothetical protein |
| BFvch461009/CDS/50S                  | 2.0  | 0.5  | 18.0 | NA | NA | hypothetical protein |
| BactD10372/CDS/CDS                   | 13.8 | 3.5  | 17.9 | NA | NA | hypothetical protein |
| BFvch462410/CDS/ATP-dependent        | 13.8 | 3.5  | 17.9 | NA | NA | hypothetical protein |
| BFncct0885/CDS/putative              | 7.9  | 2.0  | 17.9 | NA | NA | hypothetical protein |
| BFvch460967/CDS/glyceraldehyde       | 7.9  | 2.0  | 17.9 | NA | NA | hypothetical protein |
| TS29Bac00149/CDS/CDS                 | 39.2 | 10.0 | 17.8 | NA | NA | hypothetical protein |
| BFncct1955/CDS/putative              | 13.7 | 3.5  | 17.7 | NA | NA | hypothetical protein |
| Bden0010/CDS/CDS                     | 2.0  | 0.5  | 17.7 | NA | NA | hypothetical protein |
| Msm1412/CDS/tungsten                 | 5.3  | 1.4  | 17.7 | NA | NA | hypothetical protein |
| BAD1290/CDS/sugar                    | 3.3  | 0.8  | 17.7 | NA | NA | hypothetical protein |
| TS29Rum15071/CDS/CDS                 | 35.0 | 9.0  | 17.7 | NA | NA | hypothetical protein |
| BDI0494/CDS/putative                 | 35.0 | 9.0  | 17.7 | NA | NA | hypothetical protein |
| BFncct2474/CDS/hypothetical          | 2.6  | 0.7  | 17.6 | NA | NA | hypothetical protein |
| TS28Fae01662/CDS/CDS                 | 15.5 | 4.0  | 17.6 | NA | NA | hypothetical protein |
| Msm1740498/CDS/CDS                   | 31.0 | 8.0  | 17.6 | NA | NA | hypothetical protein |
| TS29Rum17530/CDS/CDS                 | 29.0 | 7.5  | 17.6 | NA | NA | hypothetical protein |
| TS29Bac07995/CDS/CDS                 | 56.0 | 14.5 | 17.5 | NA | NA | hypothetical protein |
| Msm0704/CDS/translation              | 2.3  | 0.6  | 17.5 | NA | NA | hypothetical protein |
| BDI3379/CDS/putative                 | 73.0 | 19.0 | 17.4 | NA | NA | hypothetical protein |
| BDI0484/CDS/preprotein               | 23.0 | 6.0  | 17.4 | NA | NA | hypothetical protein |
| BDI2640/CDS/hypothetical             | 23.0 | 6.0  | 17.4 | NA | NA | hypothetical protein |
| BDI0458/CDS/thiol                    | 23.0 | 6.0  | 17.4 | NA | NA | hypothetical protein |
| b3867/CDS/leoproporphyrinogen        | 3.8  | 1.0  | 17.4 | NA | NA | hypothetical protein |
| TS29Bac00719/CDS/CDS                 | 26.8 | 7.0  | 17.4 | NA | NA | hypothetical protein |
| BDI3747/CDS/hypothetical             | 88.0 | 23.0 | 17.4 | NA | NA | hypothetical protein |
| TS29Bac09289/CDS/CDS                 | 34.4 | 9.0  | 17.4 | NA | NA | hypothetical protein |
| FpraM2121176/CDS/CDS                 | 30.5 | 8.0  | 17.3 | NA | NA | hypothetical protein |
| TS28Fae11007/CDS/CDS                 | 9.5  | 2.5  | 17.3 | NA | NA | hypothetical protein |
| TS28Fae14948/CDS/CDS                 | 9.5  | 2.5  | 17.3 | NA | NA | hypothetical protein |
| FpraM2121833/CDS/CDS                 | 43.7 | 11.5 | 17.2 | NA | NA | hypothetical protein |
| TS29Bac01198/CDS/CDS                 | 15.2 | 4.0  | 17.2 | NA | NA | hypothetical protein |
| TS28Rum00322/CDS/CDS                 | 17.0 | 4.5  | 17.2 | NA | NA | hypothetical protein |
| TS29Rum15231/CDS/CDS                 | 17.0 | 4.5  | 17.2 | NA | NA | hypothetical protein |
| Bsp1163400/CDS/CDS                   | 1.3  | 0.3  | 17.2 | NA | NA | hypothetical protein |
| BVU1517/CDS/hypothetical             | 3.8  | 1.0  | 17.0 | NA | NA | hypothetical protein |
| BactD10916/CDS/CDS                   | 15.0 | 4.0  | 17.0 | NA | NA | hypothetical protein |
| TS29Bac01785/CDS/CDS                 | 30.0 | 8.0  | 17.0 | NA | NA | hypothetical protein |
| TS29Bac05518/CDS/CDS                 | 30.0 | 8.0  | 17.0 | NA | NA | hypothetical protein |
| BDI0653/CDS/slouter                  | 30.0 | 8.0  | 17.0 | NA | NA | hypothetical protein |
| Msm0200/CDS/translation              | 3.4  | 0.9  | 17.0 | NA | NA | hypothetical protein |
| Bun02824/CDS/CDS                     | 24.3 | 6.5  | 17.0 | NA | NA | hypothetical protein |
| BFncct3988/CDS/50S                   | 7.4  | 2.0  | 16.9 | NA | NA | hypothetical protein |
| BFvch464166/CDS/50S                  | 7.4  | 2.0  | 16.9 | NA | NA | hypothetical protein |
| BFncct4257/CDS/hypothetical          | 13.0 | 3.5  | 16.9 | NA | NA | hypothetical protein |
| TS29Bac03143/CDS/CDS                 | 26.0 | 7.0  | 16.9 | NA | NA | hypothetical protein |
| TS28Rum08295/CDS/CDS                 | 8.7  | 2.3  | 16.9 | NA | NA | hypothetical protein |
| Rtor1382/CDS/CDS                     | 8.7  | 2.3  | 16.9 | NA | NA | hypothetical protein |
| TS29Fae01563/CDS/CDS                 | 37.0 | 10.0 | 16.8 | NA | NA | hypothetical protein |
| Dlon0163/CDS/CDS                     | 11.1 | 3.0  | 16.7 | NA | NA | hypothetical protein |
| BFvch464191/CDS/DNA-directed         | 29.4 | 8.0  | 16.7 | NA | NA | hypothetical protein |
| Bun02857/CDS/CDS                     | 9.2  | 2.5  | 16.6 | NA | NA | hypothetical protein |
| BDI1362/CDS/putative                 | 11.0 | 3.0  | 16.6 | NA | NA | hypothetical protein |
| TS28Rum04805/CDS/CDS                 | 5.5  | 1.5  | 16.6 | NA | NA | hypothetical protein |
| TS28Fae18628/CDS/CDS                 | 5.5  | 1.5  | 16.6 | NA | NA | hypothetical protein |
| BDI1237/CDS/2-amino-3-ketobutyrate   | 11.0 | 3.0  | 16.6 | NA | NA | hypothetical protein |
| Aput0682/CDS/CDS                     | 11.0 | 3.0  | 16.6 | NA | NA | hypothetical protein |
| TS29Bac05584/CDS/CDS                 | 11.0 | 3.0  | 16.6 | NA | NA | hypothetical protein |
| TS28Fae17702/CDS/CDS                 | 11.0 | 3.0  | 16.6 | NA | NA | hypothetical protein |
| BDI3673/CDS/putative                 | 33.0 | 9.0  | 16.6 | NA | NA | hypothetical protein |
| Aput1668/CDS/CDS                     | 11.0 | 3.0  | 16.6 | NA | NA | hypothetical protein |
| BDI0618/CDS/non-specific             | 7.3  | 2.0  | 16.6 | NA | NA | hypothetical protein |
| Aput0384/CDS/CDS                     | 11.0 | 3.0  | 16.6 | NA | NA | hypothetical protein |
| b0114/CDS/ipvruvate                  | 1.8  | 0.5  | 16.6 | NA | NA | hypothetical protein |
| Aput1484/CDS/CDS                     | 11.0 | 3.0  | 16.6 | NA | NA | hypothetical protein |
| BDI3589/CDS/putative                 | 5.5  | 1.5  | 16.6 | NA | NA | hypothetical protein |
| BDI2807/CDS/putative                 | 11.0 | 3.0  | 16.6 | NA | NA | hypothetical protein |
| Bun02850/CDS/CDS                     | 16.5 | 4.5  | 16.6 | NA | NA | hypothetical protein |
| BFncct3905/CDS/hypothetical          | 5.5  | 1.5  | 16.6 | NA | NA | hypothetical protein |
| Aput1272/CDS/CDS                     | 11.0 | 3.0  | 16.6 | NA | NA | hypothetical protein |

|                                 |       |      |      |    |    |                      |
|---------------------------------|-------|------|------|----|----|----------------------|
| Aput0598 CDS CDS                | 11.0  | 3.0  | 16.6 | NA | NA | hypothetical protein |
| FpraM2122257 CDS CDS            | 1.8   | 0.5  | 16.6 | NA | NA | hypothetical protein |
| Bumi0292 CDS CDS                | 20.7  | 5.7  | 16.6 | NA | NA | hypothetical protein |
| BactD11817 CDS CDS              | 14.0  | 3.8  | 16.5 | NA | NA | hypothetical protein |
| TS29Bac04870 CDS CDS            | 14.0  | 3.8  | 16.5 | NA | NA | hypothetical protein |
| BactD12028 CDS CDS              | 12.7  | 3.5  | 16.5 | NA | NA | hypothetical protein |
| TS29Bac11275 CDS CDS            | 24.3  | 6.7  | 16.5 | NA | NA | hypothetical protein |
| TS29Fae02346 CDS CDS            | 29.0  | 8.0  | 16.5 | NA | NA | hypothetical protein |
| TS29Bac06936 CDS CDS            | 3.6   | 1.0  | 16.4 | NA | NA | hypothetical protein |
| EUBREC3460 CDS hypothetical     | 0.9   | 0.3  | 16.3 | NA | NA | hypothetical protein |
| BDI0526 CDS RNA                 | 18.0  | 5.0  | 16.3 | NA | NA | hypothetical protein |
| TS29Rum1unc0801 CDS CDS         | 18.0  | 5.0  | 16.3 | NA | NA | hypothetical protein |
| TS29Fae06390 CDS CDS            | 36.0  | 10.0 | 16.3 | NA | NA | hypothetical protein |
| BDI2264 CDS DNA-directed        | 39.5  | 11.0 | 16.3 | NA | NA | hypothetical protein |
| Bova3030 CDS CDS                | 1.8   | 0.5  | 16.2 | NA | NA | hypothetical protein |
| BWH25667 CDS CDS                | 5.3   | 1.5  | 16.1 | NA | NA | hypothetical protein |
| Bthe3735771 CDS CDS             | 5.3   | 1.5  | 16.1 | NA | NA | hypothetical protein |
| FpraM2121103 CDS CDS            | 6.5   | 1.8  | 16.1 | NA | NA | hypothetical protein |
| BFvch460562 CDS putative        | 8.8   | 2.5  | 16.0 | NA | NA | hypothetical protein |
| BFnctc0512 CDS ROK              | 8.8   | 2.5  | 16.0 | NA | NA | hypothetical protein |
| TS28Rum01975 CDS CDS            | 10.0  | 2.8  | 16.0 | NA | NA | hypothetical protein |
| TS28Rum00223 CDS CDS            | 102.0 | 29.0 | 16.0 | NA | NA | hypothetical protein |
| Bova2000 CDS CDS                | 1.2   | 0.3  | 15.9 | NA | NA | hypothetical protein |
| TS28Rum02617 CDS CDS            | 1.2   | 0.3  | 15.9 | NA | NA | hypothetical protein |
| TS29Clo1422 CDS CDS             | 7.0   | 2.0  | 15.9 | NA | NA | hypothetical protein |
| Ehal0408 CDS CDS                | 3.5   | 1.0  | 15.9 | NA | NA | hypothetical protein |
| BFnctc0828 CDS bifunctional     | 3.5   | 1.0  | 15.9 | NA | NA | hypothetical protein |
| TS29Rum17364 CDS CDS            | 7.0   | 2.0  | 15.9 | NA | NA | hypothetical protein |
| EUBREC0186 CDS ABC-type         | 3.5   | 1.0  | 15.9 | NA | NA | hypothetical protein |
| BFvch464512 CDS putative        | 1.8   | 0.5  | 15.9 | NA | NA | hypothetical protein |
| BDI0267 CDS putative            | 7.0   | 2.0  | 15.9 | NA | NA | hypothetical protein |
| b3469 CDS zinc                  | 7.0   | 2.0  | 15.9 | NA | NA | hypothetical protein |
| BDI0162 CDS hypothetical        | 14.0  | 4.0  | 15.9 | NA | NA | hypothetical protein |
| BFnctc2392 CDS queuine          | 3.5   | 1.0  | 15.9 | NA | NA | hypothetical protein |
| Bean3279 CDS CDS                | 7.0   | 2.0  | 15.9 | NA | NA | hypothetical protein |
| BFnctc2916 CDS putative         | 3.5   | 1.0  | 15.9 | NA | NA | hypothetical protein |
| TS29Rum03119 CDS CDS            | 7.0   | 2.0  | 15.9 | NA | NA | hypothetical protein |
| Dfor0622 CDS CDS                | 3.5   | 1.0  | 15.9 | NA | NA | hypothetical protein |
| BFnctc4151 CDS putative         | 3.5   | 1.0  | 15.9 | NA | NA | hypothetical protein |
| Aput1107 CDS CDS                | 7.0   | 2.0  | 15.9 | NA | NA | hypothetical protein |
| b0214 CDS ribonuclease          | 3.5   | 1.0  | 15.9 | NA | NA | hypothetical protein |
| TS28Rum08483 CDS CDS            | 3.5   | 1.0  | 15.9 | NA | NA | hypothetical protein |
| TS28Fae18875 CDS CDS            | 7.0   | 2.0  | 15.9 | NA | NA | hypothetical protein |
| b0833 CDS conserved             | 3.5   | 1.0  | 15.9 | NA | NA | hypothetical protein |
| TS28Eub0619 CDS CDS             | 3.5   | 1.0  | 15.9 | NA | NA | hypothetical protein |
| BactD23165 CDS CDS              | 3.5   | 1.0  | 15.9 | NA | NA | hypothetical protein |
| BDI0942 CDS putative            | 7.0   | 2.0  | 15.9 | NA | NA | hypothetical protein |
| TS28Met1040 CDS CDS             | 1.8   | 0.5  | 15.9 | NA | NA | hypothetical protein |
| TS29Met0453 CDS CDS             | 3.5   | 1.0  | 15.9 | NA | NA | hypothetical protein |
| BDI1873 CDS hypothetical        | 7.0   | 2.0  | 15.9 | NA | NA | hypothetical protein |
| TS28Rum10914 CDS CDS            | 3.5   | 1.0  | 15.9 | NA | NA | hypothetical protein |
| BFvch464014 CDS hypothetical    | 3.5   | 1.0  | 15.9 | NA | NA | hypothetical protein |
| BDI0388 CDS hypothetical        | 14.0  | 4.0  | 15.9 | NA | NA | hypothetical protein |
| Aput1571 CDS CDS                | 7.0   | 2.0  | 15.9 | NA | NA | hypothetical protein |
| TS29Bac01993 CDS CDS            | 3.5   | 1.0  | 15.9 | NA | NA | hypothetical protein |
| BFvch462758 CDS glutaminyl-tRNA | 3.5   | 1.0  | 15.9 | NA | NA | hypothetical protein |
| BFvch462303 CDS tRNA-guanine    | 3.5   | 1.0  | 15.9 | NA | NA | hypothetical protein |
| TS29Aii283 CDS CDS              | 7.0   | 2.0  | 15.9 | NA | NA | hypothetical protein |
| TS29Par069 CDS CDS              | 3.5   | 1.0  | 15.9 | NA | NA | hypothetical protein |
| b2805 CDS DNA-binding           | 3.5   | 1.0  | 15.9 | NA | NA | hypothetical protein |
| Ccom1306 CDS CDS                | 3.5   | 1.0  | 15.9 | NA | NA | hypothetical protein |
| BFnctc3788 CDS hypothetical     | 3.5   | 1.0  | 15.9 | NA | NA | hypothetical protein |
| Dfor3176 CDS CDS                | 3.5   | 1.0  | 15.9 | NA | NA | hypothetical protein |
| BDI3817 CDS hypothetical        | 7.0   | 2.0  | 15.9 | NA | NA | hypothetical protein |
| Dlon0994 CDS CDS                | 7.0   | 2.0  | 15.9 | NA | NA | hypothetical protein |
| TS28Rum01427 CDS CDS            | 1.8   | 0.5  | 15.9 | NA | NA | hypothetical protein |
| BDI1312 CDS putative            | 7.0   | 2.0  | 15.9 | NA | NA | hypothetical protein |
| BFvch461633 CDS putative        | 7.0   | 2.0  | 15.9 | NA | NA | hypothetical protein |
| TS28Bac2690 CDS CDS             | 2.3   | 0.7  | 15.9 | NA | NA | hypothetical protein |
| BFnctc4005 CDS elongation       | 19.2  | 5.5  | 15.8 | NA | NA | hypothetical protein |
| TS29Bac07465 CDS CDS            | 8.7   | 2.5  | 15.8 | NA | NA | hypothetical protein |
| BFvch460987 CDS outer           | 9.8   | 2.8  | 15.8 | NA | NA | hypothetical protein |
| Bfra31121758 CDS CDS            | 3.5   | 1.0  | 15.7 | NA | NA | hypothetical protein |
| TS29Par767 CDS CDS              | 224.9 | 65.0 | 15.7 | NA | NA | hypothetical protein |
| TS29Fae08625 CDS CDS            | 58.5  | 17.0 | 15.6 | NA | NA | hypothetical protein |
| BactD11585 CDS CDS              | 1.7   | 0.5  | 15.6 | NA | NA | hypothetical protein |
| BDI2052 CDS GTP                 | 24.0  | 7.0  | 15.6 | NA | NA | hypothetical protein |
| TS29Bac02922 CDS CDS            | 24.0  | 7.0  | 15.6 | NA | NA | hypothetical protein |
| Aput2282 CDS CDS                | 24.0  | 7.0  | 15.6 | NA | NA | hypothetical protein |
| BFvch461684 CDS peptide         | 12.0  | 3.5  | 15.6 | NA | NA | hypothetical protein |
| BFvch464180 CDS 50S             | 5.1   | 1.5  | 15.5 | NA | NA | hypothetical protein |
| BFnctc4002 CDS 50S              | 5.1   | 1.5  | 15.5 | NA | NA | hypothetical protein |
| BactD12171 CDS CDS              | 6.8   | 2.0  | 15.5 | NA | NA | hypothetical protein |
| BDI0963 CDS peptidase           | 20.5  | 6.0  | 15.5 | NA | NA | hypothetical protein |
| Bumi2098 CDS CDS                | 6.8   | 2.0  | 15.5 | NA | NA | hypothetical protein |
| BFvch464155 CDS DNA-directed    | 11.9  | 3.5  | 15.5 | NA | NA | hypothetical protein |
| BactD13477 CDS CDS              | 2.8   | 0.8  | 15.4 | NA | NA | hypothetical protein |
| Aput0220 CDS CDS                | 17.0  | 5.0  | 15.4 | NA | NA | hypothetical protein |
| BDI0418 CDS putative            | 17.0  | 5.0  | 15.4 | NA | NA | hypothetical protein |
| BDI3564 CDS putative            | 8.5   | 2.5  | 15.4 | NA | NA | hypothetical protein |
| Msm0740 CDS 50S                 | 0.9   | 0.3  | 15.4 | NA | NA | hypothetical protein |
| BFvch462492 CDS hypothetical    | 3.4   | 1.0  | 15.4 | NA | NA | hypothetical protein |
| TS29Fae06535 CDS CDS            | 1.7   | 0.5  | 15.4 | NA | NA | hypothetical protein |
| TS29Bac01262 CDS CDS            | 27.0  | 8.0  | 15.3 | NA | NA | hypothetical protein |
| Even1735 CDS CDS                | 1.1   | 0.3  | 15.3 | NA | NA | hypothetical protein |
| Ccom2237 CDS CDS                | 4.5   | 1.3  | 15.3 | NA | NA | hypothetical protein |

|                                             |       |       |      |    |    |                      |
|---------------------------------------------|-------|-------|------|----|----|----------------------|
| BDI2942 CDS renin-binding                   | 27.0  | 8.0   | 15.3 | NA | NA | hypothetical protein |
| TS28Rum03074 CDS CDS                        | 13.5  | 4.0   | 15.3 | NA | NA | hypothetical protein |
| TS28Fae17156 CDS CDS                        | 37.0  | 11.0  | 15.3 | NA | NA | hypothetical protein |
| Bxyl12493 CDS CDS                           | 10.0  | 3.0   | 15.2 | NA | NA | hypothetical protein |
| TS29Rum05558 CDS CDS                        | 1.7   | 0.5   | 15.1 | NA | NA | hypothetical protein |
| Bun12312 CDS CDS                            | 1.7   | 0.5   | 15.1 | NA | NA | hypothetical protein |
| BFnctc0984 CDS putative                     | 1.7   | 0.5   | 15.1 | NA | NA | hypothetical protein |
| b4079 CDS formate                           | 1.7   | 0.5   | 15.1 | NA | NA | hypothetical protein |
| Bun12886 CDS CDS                            | 3.3   | 1.0   | 15.1 | NA | NA | hypothetical protein |
| BactD10380 CDS CDS                          | 1.7   | 0.5   | 15.1 | NA | NA | hypothetical protein |
| TS29Rum18831 CDS CDS                        | 3.3   | 1.0   | 15.1 | NA | NA | hypothetical protein |
| TS29Fae00280 CDS CDS                        | 15.0  | 4.5   | 15.1 | NA | NA | hypothetical protein |
| TS28Rum15918 CDS CDS                        | 3.3   | 1.0   | 15.1 | NA | NA | hypothetical protein |
| BactD10196 CDS CDS                          | 3.3   | 1.0   | 15.1 | NA | NA | hypothetical protein |
| BFvch461655 CDS aldose                      | 5.0   | 1.5   | 15.1 | NA | NA | hypothetical protein |
| BDI2742 CDS carboxylesterase                | 20.0  | 6.0   | 15.1 | NA | NA | hypothetical protein |
| TS29RumUnc0578 CDS CDS                      | 5.0   | 1.5   | 15.1 | NA | NA | hypothetical protein |
| BDI3691 CDS orotate                         | 10.0  | 3.0   | 15.1 | NA | NA | hypothetical protein |
| TS28RumUnc1575 CDS CDS                      | 5.0   | 1.5   | 15.1 | NA | NA | hypothetical protein |
| BDI3566 CDS prolipoprotein                  | 5.0   | 1.5   | 15.1 | NA | NA | hypothetical protein |
| BDI3152 CDS N-acetylglucosamine-6-phosphate | 10.0  | 3.0   | 15.1 | NA | NA | hypothetical protein |
| BactD21952 CDS CDS                          | 10.0  | 3.0   | 15.1 | NA | NA | hypothetical protein |
| BDI1220 CDS slouter                         | 10.0  | 3.0   | 15.1 | NA | NA | hypothetical protein |
| TS28Rum15592 CDS CDS                        | 5.0   | 1.5   | 15.1 | NA | NA | hypothetical protein |
| TS28Fae07353 CDS CDS                        | 10.0  | 3.0   | 15.1 | NA | NA | hypothetical protein |
| BFnctc0481 CDS putative                     | 5.0   | 1.5   | 15.1 | NA | NA | hypothetical protein |
| TS29Clo2365 CDS CDS                         | 10.0  | 3.0   | 15.1 | NA | NA | hypothetical protein |
| BFvch462944 CDS hypothetical                | 10.0  | 3.0   | 15.1 | NA | NA | hypothetical protein |
| TS28Clo09183 CDS CDS                        | 10.0  | 3.0   | 15.1 | NA | NA | hypothetical protein |
| BDI0645 CDS putative                        | 10.0  | 3.0   | 15.1 | NA | NA | hypothetical protein |
| Msm1376 CDS DNA-directed                    | 2.5   | 0.8   | 15.1 | NA | NA | hypothetical protein |
| BDI1107 CDS phosphoserine                   | 10.0  | 3.0   | 15.1 | NA | NA | hypothetical protein |
| TS29Bac10312 CDS CDS                        | 3.3   | 1.0   | 15.1 | NA | NA | hypothetical protein |
| Bxyl1179 CDS CDS                            | 3.3   | 1.0   | 15.1 | NA | NA | hypothetical protein |
| TS29Rum09521 CDS CDS                        | 1.7   | 0.5   | 15.1 | NA | NA | hypothetical protein |
| BFvch461264 CDS hypothetical                | 1.7   | 0.5   | 15.1 | NA | NA | hypothetical protein |
| TS29Bac06300 CDS CDS                        | 1.7   | 0.5   | 15.1 | NA | NA | hypothetical protein |
| TS28Fae22716 CDS CDS                        | 109.0 | 33.0  | 15.0 | NA | NA | hypothetical protein |
| Aput1806 CDS CDS                            | 16.5  | 5.0   | 15.0 | NA | NA | hypothetical protein |
| Aput2021 CDS CDS                            | 36.0  | 11.0  | 14.9 | NA | NA | hypothetical protein |
| BDI2767 CDS hypothetical                    | 49.0  | 15.0  | 14.8 | NA | NA | hypothetical protein |
| TS29Fae05190 CDS CDS                        | 21.2  | 6.5   | 14.8 | NA | NA | hypothetical protein |
| CspM6210548 CDS CDS                         | 6.5   | 2.0   | 14.8 | NA | NA | hypothetical protein |
| BDI3086 CDS hypothetical                    | 13.0  | 4.0   | 14.8 | NA | NA | hypothetical protein |
| BDI2069 CDS ketol-acid                      | 13.0  | 4.0   | 14.8 | NA | NA | hypothetical protein |
| BFvch464513 CDS NAD-dependent               | 3.3   | 1.0   | 14.8 | NA | NA | hypothetical protein |
| Dfor0044 CDS CDS                            | 13.0  | 4.0   | 14.8 | NA | NA | hypothetical protein |
| Aput1134 CDS CDS                            | 13.0  | 4.0   | 14.8 | NA | NA | hypothetical protein |
| BFvch463388 CDS hypothetical                | 6.5   | 2.0   | 14.8 | NA | NA | hypothetical protein |
| BDI2999 CDS putative                        | 13.0  | 4.0   | 14.8 | NA | NA | hypothetical protein |
| BDI0506 CDS D-3-phosphoglycerate            | 13.0  | 4.0   | 14.8 | NA | NA | hypothetical protein |
| Aput2049 CDS CDS                            | 13.0  | 4.0   | 14.8 | NA | NA | hypothetical protein |
| Bint0432 CDS CDS                            | 4.8   | 1.5   | 14.7 | NA | NA | hypothetical protein |
| Bple2877 CDS CDS                            | 16.0  | 5.0   | 14.5 | NA | NA | hypothetical protein |
| TS29Rum00391 CDS CDS                        | 8.0   | 2.5   | 14.5 | NA | NA | hypothetical protein |
| Bxyl1750 CDS CDS                            | 1.9   | 0.6   | 14.5 | NA | NA | hypothetical protein |
| TS29Rum13795 CDS CDS                        | 102.0 | 32.0  | 14.5 | NA | NA | hypothetical protein |
| TS28Fae12703 CDS CDS                        | 66.9  | 21.0  | 14.5 | NA | NA | hypothetical protein |
| BFvch463028 CDS Siron(III)                  | 1.5   | 0.5   | 14.4 | NA | NA | hypothetical protein |
| BT1952 CDS Fe3+                             | 1.5   | 0.5   | 14.4 | NA | NA | hypothetical protein |
| Fnam2121791 CDS CDS                         | 3.2   | 1.0   | 14.4 | NA | NA | hypothetical protein |
| TS29Rum03409 CDS CDS                        | 3.2   | 1.0   | 14.4 | NA | NA | hypothetical protein |
| b4179 CDS exoribonuclease                   | 3.2   | 1.0   | 14.4 | NA | NA | hypothetical protein |
| BFvch463862 CDS 30S                         | 3.2   | 1.0   | 14.4 | NA | NA | hypothetical protein |
| BFnctc3632 CDS 30S                          | 3.2   | 1.0   | 14.4 | NA | NA | hypothetical protein |
| TS28Fae03016 CDS CDS                        | 9.5   | 3.0   | 14.4 | NA | NA | hypothetical protein |
| TS29Rum20960 CDS CDS                        | 19.0  | 6.0   | 14.4 | NA | NA | hypothetical protein |
| TS28Fae16391 CDS CDS                        | 9.5   | 3.0   | 14.4 | NA | NA | hypothetical protein |
| BDI1516 CDS putative                        | 19.0  | 6.0   | 14.4 | NA | NA | hypothetical protein |
| BT4530 CDS ATP-dependent                    | 3.2   | 1.0   | 14.4 | NA | NA | hypothetical protein |
| BFnctc3636 CDS elongation                   | 14.2  | 4.5   | 14.3 | NA | NA | hypothetical protein |
| Bcoproc1930 CDS CDS                         | 0.7   | 0.2   | 14.3 | NA | NA | hypothetical protein |
| BT1954 CDS putative                         | 0.7   | 0.2   | 14.3 | NA | NA | hypothetical protein |
| Bfin1128 CDS CDS                            | 0.7   | 0.2   | 14.3 | NA | NA | hypothetical protein |
| BactD11321 CDS CDS                          | 0.7   | 0.2   | 14.3 | NA | NA | hypothetical protein |
| BFvch463030 CDS putative                    | 0.7   | 0.2   | 14.3 | NA | NA | hypothetical protein |
| Bthe3733899 CDS CDS                         | 0.7   | 0.2   | 14.3 | NA | NA | hypothetical protein |
| TS28Par0018 CDS CDS                         | 0.7   | 0.2   | 14.3 | NA | NA | hypothetical protein |
| Bxyl1216 CDS CDS                            | 0.7   | 0.2   | 14.3 | NA | NA | hypothetical protein |
| Bthe7332528 CDS CDS                         | 0.7   | 0.2   | 14.3 | NA | NA | hypothetical protein |
| Bste0640 CDS CDS                            | 0.7   | 0.2   | 14.3 | NA | NA | hypothetical protein |
| Bege0850 CDS CDS                            | 0.7   | 0.2   | 14.3 | NA | NA | hypothetical protein |
| Bun12205 CDS CDS                            | 0.7   | 0.2   | 14.3 | NA | NA | hypothetical protein |
| TS28Fae07518 CDS CDS                        | 11.0  | 3.5   | 14.3 | NA | NA | hypothetical protein |
| BDI2619 CDS 30S                             | 22.0  | 7.0   | 14.3 | NA | NA | hypothetical protein |
| TS29Rum00032 CDS CDS                        | 429.0 | 137.0 | 14.2 | NA | NA | hypothetical protein |
| TS28Clo02972 CDS CDS                        | 12.5  | 4.0   | 14.2 | NA | NA | hypothetical protein |
| b3339 CDS protein                           | 2.6   | 0.8   | 14.1 | NA | NA | hypothetical protein |
| TS28Rum14450 CDS CDS                        | 14.0  | 4.5   | 14.1 | NA | NA | hypothetical protein |
| TS28Bif3719 CDS CDS                         | 28.0  | 9.0   | 14.1 | NA | NA | hypothetical protein |
| TS28Bac1539 CDS CDS                         | 20.7  | 6.7   | 14.1 | NA | NA | hypothetical protein |
| Bxyl1852 CDS CDS                            | 4.7   | 1.5   | 14.1 | NA | NA | hypothetical protein |
| TS29Bac05580 CDS CDS                        | 15.5  | 5.0   | 14.1 | NA | NA | hypothetical protein |
| Bova2063 CDS CDS                            | 2.6   | 0.8   | 14.1 | NA | NA | hypothetical protein |
| BFvch464158 CDS 30S                         | 3.1   | 1.0   | 14.0 | NA | NA | hypothetical protein |

|                                          |       |      |      |    |    |                      |
|------------------------------------------|-------|------|------|----|----|----------------------|
| BFnctc3979/CDS/30S                       | 3.1   | 1.0  | 14.0 | NA | NA | hypothetical protein |
| FpraM2120716/CDS/CDS                     | 6.2   | 2.0  | 14.0 | NA | NA | hypothetical protein |
| TS28Bac2868/CDS/CDS                      | 3.1   | 1.0  | 14.0 | NA | NA | hypothetical protein |
| Bxvl0795/CDS/CDS                         | 3.1   | 1.0  | 14.0 | NA | NA | hypothetical protein |
| Bsp1160220/CDS/CDS                       | 3.1   | 1.0  | 14.0 | NA | NA | hypothetical protein |
| Bova1808/CDS/CDS                         | 3.1   | 1.0  | 13.9 | NA | NA | hypothetical protein |
| BactD20607/CDS/CDS                       | 3.1   | 1.0  | 13.9 | NA | NA | hypothetical protein |
| BFnctc3635/CDS/two-component             | 4.6   | 1.5  | 13.9 | NA | NA | hypothetical protein |
| Buni1690/CDS/CDS                         | 8.7   | 2.8  | 13.9 | NA | NA | hypothetical protein |
| Bova2231/CDS/CDS                         | 131.4 | 43.0 | 13.9 | NA | NA | hypothetical protein |
| TS28Bac1458/CDS/CDS                      | 6.1   | 2.0  | 13.9 | NA | NA | hypothetical protein |
| BL1402/CDS/sresponse                     | 4.8   | 1.6  | 13.9 | NA | NA | hypothetical protein |
| BFnctc2747/CDS/IV-type                   | 4.5   | 1.5  | 13.7 | NA | NA | hypothetical protein |
| str0120/CDS/molecular                    | 2.0   | 0.7  | 13.6 | NA | NA | hypothetical protein |
| stu0120/CDS/molecular                    | 2.0   | 0.7  | 13.6 | NA | NA | hypothetical protein |
| STER0163/CDS/molecular                   | 2.0   | 0.7  | 13.6 | NA | NA | hypothetical protein |
| BactD10965/CDS/CDS                       | 2.0   | 0.7  | 13.6 | NA | NA | hypothetical protein |
| TS29Bac08870/CDS/CDS                     | 2.0   | 0.7  | 13.6 | NA | NA | hypothetical protein |
| Buni2773/CDS/CDS                         | 1.0   | 0.3  | 13.6 | NA | NA | hypothetical protein |
| Begg2764/CDS/CDS                         | 1.0   | 0.3  | 13.6 | NA | NA | hypothetical protein |
| Bova2586/CDS/CDS                         | 1.0   | 0.3  | 13.6 | NA | NA | hypothetical protein |
| BLD0800/CDS/Putative                     | 1.0   | 0.3  | 13.6 | NA | NA | hypothetical protein |
| b3340/CDS/protein                        | 1.0   | 0.3  | 13.6 | NA | NA | hypothetical protein |
| Buni3634/CDS/CDS                         | 1.0   | 0.3  | 13.6 | NA | NA | hypothetical protein |
| Buni0427/CDS/CDS                         | 1.0   | 0.3  | 13.6 | NA | NA | hypothetical protein |
| stu1647/CDS/putative                     | 1.0   | 0.3  | 13.6 | NA | NA | hypothetical protein |
| str1647/CDS/putative                     | 1.0   | 0.3  | 13.6 | NA | NA | hypothetical protein |
| TS28Bac1133/CDS/CDS                      | 1.0   | 0.3  | 13.6 | NA | NA | hypothetical protein |
| Bxvl2960/CDS/CDS                         | 1.0   | 0.3  | 13.6 | NA | NA | hypothetical protein |
| BFnctc0389/CDS/putative                  | 1.0   | 0.3  | 13.6 | NA | NA | hypothetical protein |
| Bxvl2881/CDS/CDS                         | 1.0   | 0.3  | 13.6 | NA | NA | hypothetical protein |
| Msm1537/CDS/predicted                    | 1.0   | 0.3  | 13.6 | NA | NA | hypothetical protein |
| TS28Bif2241/CDS/CDS                      | 1.0   | 0.3  | 13.6 | NA | NA | hypothetical protein |
| TS28Bac2159/CDS/CDS                      | 1.0   | 0.3  | 13.6 | NA | NA | hypothetical protein |
| BT4002/CDS/ATPase                        | 1.0   | 0.3  | 13.6 | NA | NA | hypothetical protein |
| Bsp1162318/CDS/CDS                       | 1.0   | 0.3  | 13.6 | NA | NA | hypothetical protein |
| Bova1186/CDS/CDS                         | 1.0   | 0.3  | 13.6 | NA | NA | hypothetical protein |
| BL1049/CDS/hypothetical                  | 1.0   | 0.3  | 13.6 | NA | NA | hypothetical protein |
| stu1748/CDS/excinuclease                 | 1.0   | 0.3  | 13.6 | NA | NA | hypothetical protein |
| TS28Rum06604/CDS/CDS                     | 1.0   | 0.3  | 13.6 | NA | NA | hypothetical protein |
| str0608/CDS/ferrous                      | 1.0   | 0.3  | 13.6 | NA | NA | hypothetical protein |
| Buni2968/CDS/CDS                         | 1.0   | 0.3  | 13.6 | NA | NA | hypothetical protein |
| TS29Rum10519/CDS/CDS                     | 1.0   | 0.3  | 13.6 | NA | NA | hypothetical protein |
| Pmer0679/CDS/CDS                         | 1.0   | 0.3  | 13.6 | NA | NA | hypothetical protein |
| TS28Bac1563/CDS/CDS                      | 1.0   | 0.3  | 13.6 | NA | NA | hypothetical protein |
| Hfl12895/CDS/CDS                         | 1.0   | 0.3  | 13.6 | NA | NA | hypothetical protein |
| b2320/CDS/erythronate-4-phosphate        | 1.0   | 0.3  | 13.6 | NA | NA | hypothetical protein |
| TS28Bac2180/CDS/CDS                      | 1.0   | 0.3  | 13.6 | NA | NA | hypothetical protein |
| Msm1341/CDS/isoleucyl-tRNA               | 1.0   | 0.3  | 13.6 | NA | NA | hypothetical protein |
| TS29Bac01685/CDS/CDS                     | 1.0   | 0.3  | 13.6 | NA | NA | hypothetical protein |
| TS28Bac1236/CDS/CDS                      | 1.0   | 0.3  | 13.6 | NA | NA | hypothetical protein |
| BFvch464588/CDS/putative                 | 1.0   | 0.3  | 13.6 | NA | NA | hypothetical protein |
| Dfor2558/CDS/CDS                         | 1.0   | 0.3  | 13.6 | NA | NA | hypothetical protein |
| STER0654/CDS/Fe2+                        | 1.0   | 0.3  | 13.6 | NA | NA | hypothetical protein |
| stu0608/CDS/ferrous                      | 1.0   | 0.3  | 13.6 | NA | NA | hypothetical protein |
| TS28Bac6454/CDS/CDS                      | 1.0   | 0.3  | 13.6 | NA | NA | hypothetical protein |
| BLD1741/CDS/hypothetical                 | 2.0   | 0.7  | 13.6 | NA | NA | hypothetical protein |
| b0366/CDS/taurine                        | 1.5   | 0.5  | 13.6 | NA | NA | hypothetical protein |
| BactD20149/CDS/CDS                       | 3.0   | 1.0  | 13.6 | NA | NA | hypothetical protein |
| Aput2043/CDS/CDS                         | 12.0  | 4.0  | 13.6 | NA | NA | hypothetical protein |
| TS29Rum18531/CDS/CDS                     | 3.0   | 1.0  | 13.6 | NA | NA | hypothetical protein |
| BactD21371/CDS/CDS                       | 6.0   | 2.0  | 13.6 | NA | NA | hypothetical protein |
| BDI2710/CDS/NAD-dependent                | 3.0   | 1.0  | 13.6 | NA | NA | hypothetical protein |
| TS28Fae01359/CDS/CDS                     | 3.0   | 1.0  | 13.6 | NA | NA | hypothetical protein |
| TS29Eub0683/CDS/CDS                      | 3.0   | 1.0  | 13.6 | NA | NA | hypothetical protein |
| BDI0514/CDS/electron                     | 6.0   | 2.0  | 13.6 | NA | NA | hypothetical protein |
| TS29Bac03373/CDS/CDS                     | 3.0   | 1.0  | 13.6 | NA | NA | hypothetical protein |
| TS28Clo03129/CDS/CDS                     | 3.0   | 1.0  | 13.6 | NA | NA | hypothetical protein |
| TS28Fae17102/CDS/CDS                     | 3.0   | 1.0  | 13.6 | NA | NA | hypothetical protein |
| TS28Rum02547/CDS/CDS                     | 1.5   | 0.5  | 13.6 | NA | NA | hypothetical protein |
| Buni2172/CDS/CDS                         | 3.0   | 1.0  | 13.6 | NA | NA | hypothetical protein |
| TS29Rum09757/CDS/CDS                     | 3.0   | 1.0  | 13.6 | NA | NA | hypothetical protein |
| Msm0243/CDS/exosome                      | 1.5   | 0.5  | 13.6 | NA | NA | hypothetical protein |
| Bxvl2147/CDS/CDS                         | 1.5   | 0.5  | 13.6 | NA | NA | hypothetical protein |
| BDI0797/CDS/hypothetical                 | 3.0   | 1.0  | 13.6 | NA | NA | hypothetical protein |
| TS29Fae09944/CDS/CDS                     | 6.0   | 2.0  | 13.6 | NA | NA | hypothetical protein |
| BDI2367/CDS/30S                          | 3.0   | 1.0  | 13.6 | NA | NA | hypothetical protein |
| Aste0198/CDS/CDS                         | 3.0   | 1.0  | 13.6 | NA | NA | hypothetical protein |
| BDI1195/CDS/hypothetical                 | 6.0   | 2.0  | 13.6 | NA | NA | hypothetical protein |
| TS28Clo08150/CDS/CDS                     | 3.0   | 1.0  | 13.6 | NA | NA | hypothetical protein |
| Cmet0659/CDS/CDS                         | 3.0   | 1.0  | 13.6 | NA | NA | hypothetical protein |
| Rena2178/CDS/CDS                         | 1.5   | 0.5  | 13.6 | NA | NA | hypothetical protein |
| Buni1101/CDS/CDS                         | 1.5   | 0.5  | 13.6 | NA | NA | hypothetical protein |
| Rbro0647/CDS/CDS                         | 6.0   | 2.0  | 13.6 | NA | NA | hypothetical protein |
| b3941/CDS/5,10-methylenetetrahydrofolate | 1.5   | 0.5  | 13.6 | NA | NA | hypothetical protein |
| BDI1036/CDS/hypothetical                 | 3.0   | 1.0  | 13.6 | NA | NA | hypothetical protein |
| BDI1523/CDS/hypothetical                 | 3.0   | 1.0  | 13.6 | NA | NA | hypothetical protein |
| Bcoproc0593/CDS/CDS                      | 1.5   | 0.5  | 13.6 | NA | NA | hypothetical protein |
| TS28RumUnc2041/CDS/CDS                   | 3.0   | 1.0  | 13.6 | NA | NA | hypothetical protein |
| BDI0166/CDS/putative                     | 3.0   | 1.0  | 13.6 | NA | NA | hypothetical protein |
| BactD11118/CDS/CDS                       | 3.0   | 1.0  | 13.6 | NA | NA | hypothetical protein |
| TS29Col1358/CDS/CDS                      | 3.0   | 1.0  | 13.6 | NA | NA | hypothetical protein |
| TS29Fae06200/CDS/CDS                     | 3.0   | 1.0  | 13.6 | NA | NA | hypothetical protein |
| BBD13814/CDS/putative                    | 6.0   | 2.0  | 13.6 | NA | NA | hypothetical protein |
| BDI1077/CDS/hypothetical                 | 3.0   | 1.0  | 13.6 | NA | NA | hypothetical protein |

|                                     |      |     |      |    |    |                      |
|-------------------------------------|------|-----|------|----|----|----------------------|
| Aput1028/CDS/CDS                    | 6.0  | 2.0 | 13.6 | NA | NA | hypothetical protein |
| Bxyl12365/CDS/CDS                   | 1.5  | 0.5 | 13.6 | NA | NA | hypothetical protein |
| BDI0323/CDS/hypothetical            | 6.0  | 2.0 | 13.6 | NA | NA | hypothetical protein |
| RintL11124/CDS/CDS                  | 3.0  | 1.0 | 13.6 | NA | NA | hypothetical protein |
| TS29Rum01194/CDS/CDS                | 3.0  | 1.0 | 13.6 | NA | NA | hypothetical protein |
| TS29Fae10176/CDS/CDS                | 3.0  | 1.0 | 13.6 | NA | NA | hypothetical protein |
| BFvch462647/CDS/iron-containing     | 6.0  | 2.0 | 13.6 | NA | NA | hypothetical protein |
| TS28Fae22013/CDS/CDS                | 3.0  | 1.0 | 13.6 | NA | NA | hypothetical protein |
| Rtor0789/CDS/CDS                    | 3.0  | 1.0 | 13.6 | NA | NA | hypothetical protein |
| Rtor1141/CDS/CDS                    | 1.5  | 0.5 | 13.6 | NA | NA | hypothetical protein |
| BFnctc0880/CDS/putative             | 1.5  | 0.5 | 13.6 | NA | NA | hypothetical protein |
| BFnctc1940/CDS/hypothetical         | 1.5  | 0.5 | 13.6 | NA | NA | hypothetical protein |
| b3256/CDS/acetyl-CoA                | 3.0  | 1.0 | 13.6 | NA | NA | hypothetical protein |
| BFvch463899/CDS/hypothetical        | 1.5  | 0.5 | 13.6 | NA | NA | hypothetical protein |
| TS28RumUnc1577/CDS/CDS              | 3.0  | 1.0 | 13.6 | NA | NA | hypothetical protein |
| BFnctc0226/CDS/hypothetical         | 1.5  | 0.5 | 13.6 | NA | NA | hypothetical protein |
| BFnctc0447/CDS/putative             | 1.5  | 0.5 | 13.6 | NA | NA | hypothetical protein |
| TS29Rum09941/CDS/CDS                | 3.0  | 1.0 | 13.6 | NA | NA | hypothetical protein |
| Dfor1354/CDS/CDS                    | 3.0  | 1.0 | 13.6 | NA | NA | hypothetical protein |
| BFnctc2670/CDS/putative             | 6.0  | 2.0 | 13.6 | NA | NA | hypothetical protein |
| TS29Rum00247/CDS/CDS                | 12.0 | 4.0 | 13.6 | NA | NA | hypothetical protein |
| Ccom1445/CDS/CDS                    | 3.0  | 1.0 | 13.6 | NA | NA | hypothetical protein |
| BDI2030/CDS/hypothetical            | 3.0  | 1.0 | 13.6 | NA | NA | hypothetical protein |
| BDI3744/CDS/arginine/ornithine      | 3.0  | 1.0 | 13.6 | NA | NA | hypothetical protein |
| TS28Rum12520/CDS/CDS                | 1.5  | 0.5 | 13.6 | NA | NA | hypothetical protein |
| TS29Rum12576/CDS/CDS                | 3.0  | 1.0 | 13.6 | NA | NA | hypothetical protein |
| HPAG11487/CDS/subiquinol            | 3.0  | 1.0 | 13.6 | NA | NA | hypothetical protein |
| Cbol0269/CDS/CDS                    | 3.0  | 1.0 | 13.6 | NA | NA | hypothetical protein |
| BFvch461494/CDS/levitidine          | 3.0  | 1.0 | 13.6 | NA | NA | hypothetical protein |
| TS29Dor1446/CDS/CDS                 | 12.0 | 4.0 | 13.6 | NA | NA | hypothetical protein |
| ShigspD92851/CDS/CDS                | 1.5  | 0.5 | 13.6 | NA | NA | hypothetical protein |
| Buni0936/CDS/CDS                    | 3.0  | 1.0 | 13.6 | NA | NA | hypothetical protein |
| M23Apeg2174/CDS/hypothetical        | 3.0  | 1.0 | 13.6 | NA | NA | hypothetical protein |
| BFvch462408/CDS/putative            | 1.5  | 0.5 | 13.6 | NA | NA | hypothetical protein |
| TS29Rum17969/CDS/CDS                | 3.0  | 1.0 | 13.6 | NA | NA | hypothetical protein |
| BFvch460602/CDS/LuxR                | 1.5  | 0.5 | 13.6 | NA | NA | hypothetical protein |
| BDI0955/CDS/putative                | 15.0 | 5.0 | 13.6 | NA | NA | hypothetical protein |
| TS28Rum13911/CDS/CDS                | 7.5  | 2.5 | 13.6 | NA | NA | hypothetical protein |
| EUBREC1485/CDS/ribosomal            | 3.0  | 1.0 | 13.6 | NA | NA | hypothetical protein |
| TS29Fae07331/CDS/CDS                | 6.0  | 2.0 | 13.6 | NA | NA | hypothetical protein |
| BFnctc1315/CDS/putative             | 1.5  | 0.5 | 13.6 | NA | NA | hypothetical protein |
| BFvch460502/CDS/putative            | 1.5  | 0.5 | 13.6 | NA | NA | hypothetical protein |
| b3052/CDS/fused                     | 3.0  | 1.0 | 13.6 | NA | NA | hypothetical protein |
| BDI0312/CDS/glycine                 | 6.0  | 2.0 | 13.6 | NA | NA | hypothetical protein |
| BFnctc3247/CDS/putative             | 6.0  | 2.0 | 13.6 | NA | NA | hypothetical protein |
| Aput0539/CDS/CDS                    | 12.0 | 4.0 | 13.6 | NA | NA | hypothetical protein |
| TS28Rum12867/CDS/CDS                | 1.5  | 0.5 | 13.6 | NA | NA | hypothetical protein |
| BFvch461327/CDS/hypothetical        | 1.5  | 0.5 | 13.6 | NA | NA | hypothetical protein |
| TS29Rum00252/CDS/CDS                | 3.0  | 1.0 | 13.6 | NA | NA | hypothetical protein |
| Casp0144/CDS/CDS                    | 6.0  | 2.0 | 13.6 | NA | NA | hypothetical protein |
| BDI2758/CDS/transcription           | 6.0  | 2.0 | 13.6 | NA | NA | hypothetical protein |
| TS29Clo2463/CDS/CDS                 | 3.0  | 1.0 | 13.6 | NA | NA | hypothetical protein |
| Aput0686/CDS/CDS                    | 6.0  | 2.0 | 13.6 | NA | NA | hypothetical protein |
| TS28Fae12298/CDS/CDS                | 6.0  | 2.0 | 13.6 | NA | NA | hypothetical protein |
| BFnctc4084/CDS/hypothetical         | 1.5  | 0.5 | 13.6 | NA | NA | hypothetical protein |
| BLD1715/CDS/Ribosomal               | 0.8  | 0.3 | 13.6 | NA | NA | hypothetical protein |
| HPAG10287/CDS/hypothetical          | 3.0  | 1.0 | 13.6 | NA | NA | hypothetical protein |
| b3956/CDS/phosphoenolpyruvate       | 1.5  | 0.5 | 13.6 | NA | NA | hypothetical protein |
| BFnctc3191/CDS/hypothetical         | 1.5  | 0.5 | 13.6 | NA | NA | hypothetical protein |
| Anut1693/CDS/CDS                    | 6.0  | 2.0 | 13.6 | NA | NA | hypothetical protein |
| Bcopron1580/CDS/CDS                 | 3.0  | 1.0 | 13.6 | NA | NA | hypothetical protein |
| b3502/CDS/arsenic/antimonite        | 1.5  | 0.5 | 13.6 | NA | NA | hypothetical protein |
| BFvch462360/CDS/hypothetical        | 3.0  | 1.0 | 13.6 | NA | NA | hypothetical protein |
| TS29Rum00379/CDS/CDS                | 3.0  | 1.0 | 13.6 | NA | NA | hypothetical protein |
| Aput0502/CDS/CDS                    | 12.0 | 4.0 | 13.6 | NA | NA | hypothetical protein |
| b2292/CDS/predicted                 | 3.0  | 1.0 | 13.6 | NA | NA | hypothetical protein |
| BDI3568/CDS/glycosamine-6-phosphate | 3.0  | 1.0 | 13.6 | NA | NA | hypothetical protein |
| BDI0761/CDS/folylpolyglutamate      | 6.0  | 2.0 | 13.6 | NA | NA | hypothetical protein |
| BDI3171/CDS/glycine                 | 3.0  | 1.0 | 13.6 | NA | NA | hypothetical protein |
| BFvch464543/CDS/putative            | 1.5  | 0.5 | 13.6 | NA | NA | hypothetical protein |
| BFnctc0136/CDS/putative             | 3.0  | 1.0 | 13.6 | NA | NA | hypothetical protein |
| BDI2946/CDS/glycoside               | 3.0  | 1.0 | 13.6 | NA | NA | hypothetical protein |
| BFvch462747/CDS/dipeptidyl          | 3.0  | 1.0 | 13.6 | NA | NA | hypothetical protein |
| Msm0792/CDS/predicted               | 0.8  | 0.3 | 13.6 | NA | NA | hypothetical protein |
| RintL11545/CDS/CDS                  | 3.0  | 1.0 | 13.6 | NA | NA | hypothetical protein |
| Bthe3732252/CDS/CDS                 | 1.5  | 0.5 | 13.6 | NA | NA | hypothetical protein |
| RintL10676/CDS/CDS                  | 3.0  | 1.0 | 13.6 | NA | NA | hypothetical protein |
| TS29Fae05600/CDS/CDS                | 3.0  | 1.0 | 13.6 | NA | NA | hypothetical protein |
| TS28Clo05010/CDS/CDS                | 3.0  | 1.0 | 13.6 | NA | NA | hypothetical protein |
| BDI2583/CDS/hypothetical            | 1.5  | 0.5 | 13.6 | NA | NA | hypothetical protein |
| FpraM2120057/CDS/CDS                | 3.0  | 1.0 | 13.6 | NA | NA | hypothetical protein |
| Cbol0587/CDS/CDS                    | 3.0  | 1.0 | 13.6 | NA | NA | hypothetical protein |
| Aput1434/CDS/CDS                    | 15.0 | 5.0 | 13.6 | NA | NA | hypothetical protein |
| TS29Fae06504/CDS/CDS                | 3.0  | 1.0 | 13.6 | NA | NA | hypothetical protein |
| b0412/CDS/npredicted                | 3.0  | 1.0 | 13.6 | NA | NA | hypothetical protein |
| TS29Rum16374/CDS/CDS                | 15.0 | 5.0 | 13.6 | NA | NA | hypothetical protein |
| BDI0776/CDS/hypothetical            | 3.0  | 1.0 | 13.6 | NA | NA | hypothetical protein |
| Cbar1101/CDS/CDS                    | 3.0  | 1.0 | 13.6 | NA | NA | hypothetical protein |
| BFnctc3398/CDS/hypothetical         | 1.5  | 0.5 | 13.6 | NA | NA | hypothetical protein |
| BFvch461331/CDS/putative            | 1.5  | 0.5 | 13.6 | NA | NA | hypothetical protein |
| Bxyl1017/CDS/CDS                    | 1.5  | 0.5 | 13.6 | NA | NA | hypothetical protein |
| Rena1037/CDS/CDS                    | 3.0  | 1.0 | 13.6 | NA | NA | hypothetical protein |
| TS28Dor0678/CDS/CDS                 | 3.0  | 1.0 | 13.6 | NA | NA | hypothetical protein |
| Msm1430/CDS/ribosomal               | 0.8  | 0.3 | 13.6 | NA | NA | hypothetical protein |
| Msm0268/CDS/cysteinyI-HRNA          | 1.5  | 0.5 | 13.6 | NA | NA | hypothetical protein |
| TS29Rum18572/CDS/CDS                | 3.0  | 1.0 | 13.6 | NA | NA | hypothetical protein |

|                               |      |      |      |    |    |                      |
|-------------------------------|------|------|------|----|----|----------------------|
| TS28Rum02626/CDS/CDS          | 1.5  | 0.5  | 13.6 | NA | NA | hypothetical protein |
| TS28Clo05766/CDS/CDS          | 3.0  | 1.0  | 13.6 | NA | NA | hypothetical protein |
| TS29Rum13304/CDS/CDS          | 3.0  | 1.0  | 13.6 | NA | NA | hypothetical protein |
| TS29Ali093/CDS/CDS            | 6.0  | 2.0  | 13.6 | NA | NA | hypothetical protein |
| Msm1245/CDS/DNA-binding       | 1.5  | 0.5  | 13.6 | NA | NA | hypothetical protein |
| BDI0331/CDS/putative          | 6.0  | 2.0  | 13.6 | NA | NA | hypothetical protein |
| BDI3363/CDS/putative          | 3.0  | 1.0  | 13.6 | NA | NA | hypothetical protein |
| TS28Rum14018/CDS/CDS          | 3.0  | 1.0  | 13.6 | NA | NA | hypothetical protein |
| Aput0968/CDS/CDS              | 12.0 | 4.0  | 13.6 | NA | NA | hypothetical protein |
| Aput0254/CDS/CDS              | 6.0  | 2.0  | 13.6 | NA | NA | hypothetical protein |
| TS28Rum05014/CDS/CDS          | 1.5  | 0.5  | 13.6 | NA | NA | hypothetical protein |
| TS29Fae05334/CDS/CDS          | 6.0  | 2.0  | 13.6 | NA | NA | hypothetical protein |
| RintL_10310/CDS/CDS           | 3.0  | 1.0  | 13.6 | NA | NA | hypothetical protein |
| Rgna2483/CDS/CDS              | 3.0  | 1.0  | 13.6 | NA | NA | hypothetical protein |
| TS29Ali357/CDS/CDS            | 3.0  | 1.0  | 13.6 | NA | NA | hypothetical protein |
| BL1588/CDS/SOS                | 0.8  | 0.3  | 13.6 | NA | NA | hypothetical protein |
| TS29Ali240/CDS/CDS            | 6.0  | 2.0  | 13.6 | NA | NA | hypothetical protein |
| TS29Rum12260/CDS/CDS          | 3.0  | 1.0  | 13.6 | NA | NA | hypothetical protein |
| TS29Rum16643/CDS/CDS          | 15.0 | 5.0  | 13.6 | NA | NA | hypothetical protein |
| TS29Dor0920/CDS/CDS           | 15.0 | 5.0  | 13.6 | NA | NA | hypothetical protein |
| b1502/CDS/predicted           | 1.5  | 0.5  | 13.6 | NA | NA | hypothetical protein |
| TS29Rum10744/CDS/CDS          | 3.0  | 1.0  | 13.6 | NA | NA | hypothetical protein |
| Clep0634/CDS/CDS              | 3.0  | 1.0  | 13.6 | NA | NA | hypothetical protein |
| BDI1140/CDS/hypothetical      | 3.0  | 1.0  | 13.6 | NA | NA | hypothetical protein |
| Buni3333/CDS/CDS              | 1.5  | 0.5  | 13.6 | NA | NA | hypothetical protein |
| TS29Par196/CDS/CDS            | 3.0  | 1.0  | 13.6 | NA | NA | hypothetical protein |
| Bthe3733487/CDS/CDS           | 16.5 | 5.5  | 13.6 | NA | NA | hypothetical protein |
| BDI2562/CDS/hypothetical      | 3.0  | 1.0  | 13.6 | NA | NA | hypothetical protein |
| TS29Rum07663/CDS/CDS          | 12.0 | 4.0  | 13.6 | NA | NA | hypothetical protein |
| Clep1381/CDS/CDS              | 6.0  | 2.0  | 13.6 | NA | NA | hypothetical protein |
| BFnctc0486/CDS/putative       | 1.5  | 0.5  | 13.6 | NA | NA | hypothetical protein |
| BFvch460270/CDS/hypothetical  | 1.5  | 0.5  | 13.6 | NA | NA | hypothetical protein |
| b0212/CDS/predicted           | 1.5  | 0.5  | 13.6 | NA | NA | hypothetical protein |
| TS28Rum01652/CDS/CDS          | 12.0 | 4.0  | 13.6 | NA | NA | hypothetical protein |
| Buni0052/CDS/CDS              | 1.5  | 0.5  | 13.6 | NA | NA | hypothetical protein |
| BFnctc1176/CDS/hypothetical   | 1.5  | 0.5  | 13.6 | NA | NA | hypothetical protein |
| TS29Fae05102/CDS/CDS          | 6.0  | 2.0  | 13.6 | NA | NA | hypothetical protein |
| TS28Fae21143/CDS/CDS          | 3.0  | 1.0  | 13.6 | NA | NA | hypothetical protein |
| BDI3297/CDS/putative          | 3.0  | 1.0  | 13.6 | NA | NA | hypothetical protein |
| BFvch462737/CDS/two-component | 1.5  | 0.5  | 13.6 | NA | NA | hypothetical protein |
| TS28Rum12471/CDS/CDS          | 1.5  | 0.5  | 13.6 | NA | NA | hypothetical protein |
| BDI3750/CDS/putative          | 6.0  | 2.0  | 13.6 | NA | NA | hypothetical protein |
| Buni1074/CDS/CDS              | 1.5  | 0.5  | 13.6 | NA | NA | hypothetical protein |
| TS28Clo09439/CDS/CDS          | 3.0  | 1.0  | 13.6 | NA | NA | hypothetical protein |
| TS28Bi4717/CDS/CDS            | 0.6  | 0.2  | 13.6 | NA | NA | hypothetical protein |
| Rtor0382/CDS/CDS              | 3.0  | 1.0  | 13.6 | NA | NA | hypothetical protein |
| TS28Rum05444/CDS/CDS          | 3.0  | 1.0  | 13.6 | NA | NA | hypothetical protein |
| Csei2017/CDS/CDS              | 3.0  | 1.0  | 13.6 | NA | NA | hypothetical protein |
| TS29Met0789/CDS/CDS           | 3.0  | 1.0  | 13.6 | NA | NA | hypothetical protein |
| TS29Fae03671/CDS/CDS          | 1.5  | 0.5  | 13.6 | NA | NA | hypothetical protein |
| BFvch461047/CDS/hypothetical  | 1.5  | 0.5  | 13.6 | NA | NA | hypothetical protein |
| TS28Clo09575/CDS/CDS          | 6.0  | 2.0  | 13.6 | NA | NA | hypothetical protein |
| BDI0798/CDS/hypothetical      | 3.0  | 1.0  | 13.6 | NA | NA | hypothetical protein |
| b4174/CDS/modulator           | 1.5  | 0.5  | 13.6 | NA | NA | hypothetical protein |
| TS28RumUnc1927/CDS/CDS        | 3.0  | 1.0  | 13.6 | NA | NA | hypothetical protein |
| TS29Rum20005/CDS/CDS          | 3.0  | 1.0  | 13.6 | NA | NA | hypothetical protein |
| Even0032/CDS/CDS              | 3.0  | 1.0  | 13.6 | NA | NA | hypothetical protein |
| b2118/CDS/conserved           | 3.0  | 1.0  | 13.6 | NA | NA | hypothetical protein |
| TS29RumUnc1006/CDS/CDS        | 3.0  | 1.0  | 13.6 | NA | NA | hypothetical protein |
| TS28Rum14457/CDS/CDS          | 6.0  | 2.0  | 13.6 | NA | NA | hypothetical protein |
| TS29Dor1871/CDS/CDS           | 6.0  | 2.0  | 13.6 | NA | NA | hypothetical protein |
| TS28Eub1208/CDS/CDS           | 3.0  | 1.0  | 13.6 | NA | NA | hypothetical protein |
| TS28Rum04484/CDS/CDS          | 3.0  | 1.0  | 13.6 | NA | NA | hypothetical protein |
| EUBREC2954/CDS/two-component  | 1.5  | 0.5  | 13.6 | NA | NA | hypothetical protein |
| Cbo13415/CDS/CDS              | 6.0  | 2.0  | 13.6 | NA | NA | hypothetical protein |
| TS28Rum05973/CDS/CDS          | 3.0  | 1.0  | 13.6 | NA | NA | hypothetical protein |
| TS29Rum03515/CDS/CDS          | 1.5  | 0.5  | 13.6 | NA | NA | hypothetical protein |
| BFvch463594/CDS/putative      | 1.5  | 0.5  | 13.6 | NA | NA | hypothetical protein |
| BDI0504/CDS/recombination     | 15.0 | 5.0  | 13.6 | NA | NA | hypothetical protein |
| Aput0854/CDS/CDS              | 6.0  | 2.0  | 13.6 | NA | NA | hypothetical protein |
| BFvch464411/CDS/hypothetical  | 3.0  | 1.0  | 13.6 | NA | NA | hypothetical protein |
| TS28Fae19327/CDS/CDS          | 1.5  | 0.5  | 13.6 | NA | NA | hypothetical protein |
| BFvch461641/CDS/putative      | 1.5  | 0.5  | 13.6 | NA | NA | hypothetical protein |
| Ccom1591/CDS/CDS              | 3.0  | 1.0  | 13.6 | NA | NA | hypothetical protein |
| Caer1622/CDS/CDS              | 3.0  | 1.0  | 13.6 | NA | NA | hypothetical protein |
| Buni0563/CDS/CDS              | 3.0  | 1.0  | 13.6 | NA | NA | hypothetical protein |
| TS28Clo02716/CDS/CDS          | 6.0  | 2.0  | 13.6 | NA | NA | hypothetical protein |
| BFvch463291/CDS/biotin        | 1.5  | 0.5  | 13.6 | NA | NA | hypothetical protein |
| TS29Rum12414/CDS/CDS          | 33.0 | 11.0 | 13.6 | NA | NA | hypothetical protein |
| TS28RumUnc1357/CDS/CDS        | 3.0  | 1.0  | 13.6 | NA | NA | hypothetical protein |
| Dfor2089/CDS/CDS              | 6.0  | 2.0  | 13.6 | NA | NA | hypothetical protein |
| BFnctc0159/CDS/hypothetical   | 1.5  | 0.5  | 13.6 | NA | NA | hypothetical protein |
| Buni0852/CDS/CDS              | 1.5  | 0.5  | 13.6 | NA | NA | hypothetical protein |
| EUBREC1464/CDS/hypothetical   | 3.0  | 1.0  | 13.6 | NA | NA | hypothetical protein |
| TS29Rum02103/CDS/CDS          | 3.0  | 1.0  | 13.6 | NA | NA | hypothetical protein |
| EUBREC2145/CDS/hypothetical   | 3.0  | 1.0  | 13.6 | NA | NA | hypothetical protein |
| Dfor2351/CDS/CDS              | 3.0  | 1.0  | 13.6 | NA | NA | hypothetical protein |
| PRABACTJOHN3100/CDS/CDS       | 3.0  | 1.0  | 13.6 | NA | NA | hypothetical protein |
| BDI1892/CDS/hypothetical      | 6.0  | 2.0  | 13.6 | NA | NA | hypothetical protein |
| BFvch461878/CDS/putative      | 1.5  | 0.5  | 13.6 | NA | NA | hypothetical protein |
| BFnctc3669/CDS/hypothetical   | 1.5  | 0.5  | 13.6 | NA | NA | hypothetical protein |
| Dlon0170/CDS/CDS              | 6.0  | 2.0  | 13.6 | NA | NA | hypothetical protein |
| HPAG11274/CDS/cation          | 3.0  | 1.0  | 13.6 | NA | NA | hypothetical protein |
| b2154/CDS/predicted           | 3.0  | 1.0  | 13.6 | NA | NA | hypothetical protein |
| EUBREC0191/CDS/hypothetical   | 3.0  | 1.0  | 13.6 | NA | NA | hypothetical protein |
| BL0130/CDS/hypothetical       | 0.8  | 0.3  | 13.6 | NA | NA | hypothetical protein |



|                                             |      |      |      |    |    |                      |
|---------------------------------------------|------|------|------|----|----|----------------------|
| Dlon0829/CDS/CDS                            | 3.0  | 1.0  | 13.6 | NA | NA | hypothetical protein |
| M23Ane955/CDS/Lysyl-tRNA                    | 3.0  | 1.0  | 13.6 | NA | NA | hypothetical protein |
| TS28Rum03008/CDS/CDS                        | 1.5  | 0.5  | 13.6 | NA | NA | hypothetical protein |
| BFncet0963/CDS/hypothetical                 | 1.5  | 0.5  | 13.6 | NA | NA | hypothetical protein |
| BactD2313/CDS/CDS                           | 1.5  | 0.5  | 13.6 | NA | NA | hypothetical protein |
| FpraM2121468/CDS/CDS                        | 3.0  | 1.0  | 13.6 | NA | NA | hypothetical protein |
| BD13548/CDS/glutamine                       | 6.0  | 2.0  | 13.6 | NA | NA | hypothetical protein |
| TS28Met1032/CDS/CDS                         | 1.5  | 0.5  | 13.6 | NA | NA | hypothetical protein |
| BD13210/CDS/putative                        | 6.0  | 2.0  | 13.6 | NA | NA | hypothetical protein |
| BFvch462606/CDS/putative                    | 1.5  | 0.5  | 13.6 | NA | NA | hypothetical protein |
| TS28Fae15376/CDS/CDS                        | 3.0  | 1.0  | 13.6 | NA | NA | hypothetical protein |
| BFncet3043/CDS/hypothetical                 | 1.5  | 0.5  | 13.6 | NA | NA | hypothetical protein |
| TS28Fae09585/CDS/CDS                        | 3.0  | 1.0  | 13.6 | NA | NA | hypothetical protein |
| TS29Rum0785/CDS/CDS                         | 3.0  | 1.0  | 13.6 | NA | NA | hypothetical protein |
| TS29Rum17974/CDS/CDS                        | 1.5  | 0.5  | 13.6 | NA | NA | hypothetical protein |
| Pmer3259/CDS/CDS                            | 3.0  | 1.0  | 13.6 | NA | NA | hypothetical protein |
| BFvch463404/CDS/hypothetical                | 6.0  | 2.0  | 13.6 | NA | NA | hypothetical protein |
| TS29Met0145/CDS/CDS                         | 12.0 | 4.0  | 13.6 | NA | NA | hypothetical protein |
| BD12587/CDS/hypothetical                    | 3.0  | 1.0  | 13.6 | NA | NA | hypothetical protein |
| TS29Rum10233/CDS/CDS                        | 3.0  | 1.0  | 13.6 | NA | NA | hypothetical protein |
| TS29Rum06777/CDS/CDS                        | 1.5  | 0.5  | 13.6 | NA | NA | hypothetical protein |
| BFncet0552/CDS/LuxR                         | 1.5  | 0.5  | 13.6 | NA | NA | hypothetical protein |
| EUBRFC2887/CDS/two-component                | 3.0  | 1.0  | 13.6 | NA | NA | hypothetical protein |
| BactD21951/CDS/CDS                          | 6.0  | 2.0  | 13.6 | NA | NA | hypothetical protein |
| TS28Eub8163/CDS/CDS                         | 3.0  | 1.0  | 13.6 | NA | NA | hypothetical protein |
| BFncet4156/CDS/hypothetical                 | 1.5  | 0.5  | 13.6 | NA | NA | hypothetical protein |
| TS29Clo2125/CDS/CDS                         | 3.0  | 1.0  | 13.6 | NA | NA | hypothetical protein |
| TS29Rum21188/CDS/CDS                        | 3.0  | 1.0  | 13.6 | NA | NA | hypothetical protein |
| Bple1104/CDS/CDS                            | 1.5  | 0.5  | 13.6 | NA | NA | hypothetical protein |
| TS29Ali242/CDS/CDS                          | 3.0  | 1.0  | 13.6 | NA | NA | hypothetical protein |
| TS29Rum03532/CDS/CDS                        | 3.0  | 1.0  | 13.6 | NA | NA | hypothetical protein |
| TS29Rum17630/CDS/CDS                        | 3.0  | 1.0  | 13.6 | NA | NA | hypothetical protein |
| TS29Rum09927/CDS/CDS                        | 3.0  | 1.0  | 13.6 | NA | NA | hypothetical protein |
| BLD1403/CDS/LacI-type                       | 3.0  | 1.0  | 13.6 | NA | NA | hypothetical protein |
| TS29Rum18848/CDS/CDS                        | 3.0  | 1.0  | 13.6 | NA | NA | hypothetical protein |
| FpraM2122044/CDS/CDS                        | 3.0  | 1.0  | 13.6 | NA | NA | hypothetical protein |
| BD12495/CDS/hypothetical                    | 3.0  | 1.0  | 13.6 | NA | NA | hypothetical protein |
| BD12113/CDS/hypothetical                    | 3.0  | 1.0  | 13.6 | NA | NA | hypothetical protein |
| Aput0099/CDS/CDS                            | 3.0  | 1.0  | 13.6 | NA | NA | hypothetical protein |
| Robe0271/CDS/CDS                            | 1.5  | 0.5  | 13.6 | NA | NA | hypothetical protein |
| BD11081/CDS/putative                        | 9.0  | 3.0  | 13.6 | NA | NA | hypothetical protein |
| TS28Clo02771/CDS/CDS                        | 18.0 | 6.0  | 13.6 | NA | NA | hypothetical protein |
| BD11733/CDS/malic                           | 36.0 | 12.0 | 13.6 | NA | NA | hypothetical protein |
| BD12353/CDS/50S                             | 9.0  | 3.0  | 13.6 | NA | NA | hypothetical protein |
| Aput1061/CDS/CDS                            | 9.0  | 3.0  | 13.6 | NA | NA | hypothetical protein |
| TS29Ali150/CDS/CDS                          | 4.5  | 1.5  | 13.6 | NA | NA | hypothetical protein |
| BD12388/CDS/hypothetical                    | 9.0  | 3.0  | 13.6 | NA | NA | hypothetical protein |
| Caer1870/CDS/CDS                            | 4.5  | 1.5  | 13.6 | NA | NA | hypothetical protein |
| BD12001/CDS/putative                        | 9.0  | 3.0  | 13.6 | NA | NA | hypothetical protein |
| Aput1346/CDS/CDS                            | 9.0  | 3.0  | 13.6 | NA | NA | hypothetical protein |
| Aput1119/CDS/CDS                            | 4.5  | 1.5  | 13.6 | NA | NA | hypothetical protein |
| BD12507/CDS/hypothetical                    | 9.0  | 3.0  | 13.6 | NA | NA | hypothetical protein |
| TS28Fae18501/CDS/CDS                        | 4.5  | 1.5  | 13.6 | NA | NA | hypothetical protein |
| Caer2210/CDS/CDS                            | 4.5  | 1.5  | 13.6 | NA | NA | hypothetical protein |
| TS28Fae09498/CDS/CDS                        | 9.0  | 3.0  | 13.6 | NA | NA | hypothetical protein |
| BD10519/CDS/CTP                             | 9.0  | 3.0  | 13.6 | NA | NA | hypothetical protein |
| BLD0587/CDS/Ribosomal                       | 2.3  | 0.8  | 13.6 | NA | NA | hypothetical protein |
| BD10354/CDS/hypothetical                    | 9.0  | 3.0  | 13.6 | NA | NA | hypothetical protein |
| TS28Fae18377/CDS/CDS                        | 9.0  | 3.0  | 13.6 | NA | NA | hypothetical protein |
| BD12086/CDS/nicotinate-nucleotide           | 9.0  | 3.0  | 13.6 | NA | NA | hypothetical protein |
| Bxyl0201/CDS/CDS                            | 2.0  | 0.7  | 13.6 | NA | NA | hypothetical protein |
| BFncet2510/CDS/50S                          | 6.0  | 2.0  | 13.5 | NA | NA | hypothetical protein |
| Bxyl0240/CDS/CDS                            | 3.0  | 1.0  | 13.5 | NA | NA | hypothetical protein |
| BFvch461043/CDS/30S                         | 8.9  | 3.0  | 13.5 | NA | NA | hypothetical protein |
| BD12374/CDS/30S                             | 17.8 | 6.0  | 13.5 | NA | NA | hypothetical protein |
| TS29Rum13372/CDS/CDS                        | 31.2 | 10.5 | 13.5 | NA | NA | hypothetical protein |
| BL1593/CDS/30S                              | 3.7  | 1.3  | 13.4 | NA | NA | hypothetical protein |
| BLD1720/CDS/Ribosomal                       | 3.7  | 1.3  | 13.4 | NA | NA | hypothetical protein |
| Bxyl4456/CDS/CDS                            | 1.5  | 0.5  | 13.4 | NA | NA | hypothetical protein |
| Rior1548/CDS/CDS                            | 59.0 | 20.0 | 13.4 | NA | NA | hypothetical protein |
| BL1596/CDS/50S                              | 2.5  | 0.8  | 13.3 | NA | NA | hypothetical protein |
| Buni3209/CDS/CDS                            | 5.9  | 2.0  | 13.3 | NA | NA | hypothetical protein |
| BactD12790/CDS/CDS                          | 3.9  | 1.3  | 13.3 | NA | NA | hypothetical protein |
| TS29Rum15668/CDS/CDS                        | 47.0 | 16.0 | 13.3 | NA | NA | hypothetical protein |
| BFvch462527/CDS/superoxide                  | 5.8  | 2.0  | 13.2 | NA | NA | hypothetical protein |
| TS28Rum14949/CDS/CDS                        | 17.5 | 6.0  | 13.2 | NA | NA | hypothetical protein |
| BD12252/CDS/delta-1-pyrroline-5-carboxylate | 17.5 | 6.0  | 13.2 | NA | NA | hypothetical protein |
| BFvch461552/CDS/ribonuclease                | 4.4  | 1.5  | 13.2 | NA | NA | hypothetical protein |
| TS29Bac08532/CDS/CDS                        | 3.9  | 1.3  | 13.2 | NA | NA | hypothetical protein |
| Aput1267/CDS/CDS                            | 29.0 | 10.0 | 13.2 | NA | NA | hypothetical protein |
| TS29Bac11379/CDS/CDS                        | 14.5 | 5.0  | 13.2 | NA | NA | hypothetical protein |
| TS29Fae08572/CDS/CDS                        | 87.0 | 30.0 | 13.2 | NA | NA | hypothetical protein |
| Msm1122/CDS/coenzyme                        | 2.9  | 1.0  | 13.2 | NA | NA | hypothetical protein |
| BFncet1919/CDS/6-phosphogluconate           | 4.3  | 1.5  | 13.1 | NA | NA | hypothetical protein |
| Rena2802/CDS/CDS                            | 15.8 | 5.5  | 13.1 | NA | NA | hypothetical protein |
| Rena3025/CDS/CDS                            | 15.8 | 5.5  | 13.1 | NA | NA | hypothetical protein |
| BFncet3976/CDS/DNA-directed                 | 12.9 | 4.5  | 13.1 | NA | NA | hypothetical protein |
| CspM6211856/CDS/CDS                         | 1.4  | 0.5  | 13.0 | NA | NA | hypothetical protein |
| Dfor2025/CDS/CDS                            | 1.4  | 0.5  | 13.0 | NA | NA | hypothetical protein |
| TS29Rum15985/CDS/CDS                        | 31.5 | 11.0 | 13.0 | NA | NA | hypothetical protein |
| BVU0817/CDS/50S                             | 2.9  | 1.0  | 13.0 | NA | NA | hypothetical protein |
| TS28Rum13299/CDS/CDS                        | 41.5 | 14.5 | 13.0 | NA | NA | hypothetical protein |
| BactD14398/CDS/CDS                          | 1.7  | 0.6  | 13.0 | NA | NA | hypothetical protein |
| Rbro0754/CDS/CDS                            | 6.7  | 2.3  | 13.0 | NA | NA | hypothetical protein |
| Aput0883/CDS/CDS                            | 20.0 | 7.0  | 13.0 | NA | NA | hypothetical protein |

|                                        |      |      |      |    |    |                      |
|----------------------------------------|------|------|------|----|----|----------------------|
| Bxyl4371 CDS CDS                       | 20.3 | 7.2  | 12.9 | NA | NA | hypothetical protein |
| BFvch464142 CDS loutier                | 2.8  | 1.0  | 12.9 | NA | NA | hypothetical protein |
| TS29Bac09227 CDS CDS                   | 8.5  | 3.0  | 12.9 | NA | NA | hypothetical protein |
| TS28Fae10681 CDS CDS                   | 8.5  | 3.0  | 12.9 | NA | NA | hypothetical protein |
| BFnctc3619 CDS putative                | 8.5  | 3.0  | 12.9 | NA | NA | hypothetical protein |
| TS28Fae20999 CDS CDS                   | 17.0 | 6.0  | 12.9 | NA | NA | hypothetical protein |
| TS29Fae07524 CDS CDS                   | 34.0 | 12.0 | 12.9 | NA | NA | hypothetical protein |
| Bxyl1306 CDS CDS                       | 8.5  | 3.0  | 12.9 | NA | NA | hypothetical protein |
| TS29Bac02966 CDS CDS                   | 17.0 | 6.0  | 12.9 | NA | NA | hypothetical protein |
| b0575 CDS conpper/silver               | 2.8  | 1.0  | 12.9 | NA | NA | hypothetical protein |
| TS29Bac05130 CDS CDS                   | 31.2 | 11.0 | 12.9 | NA | NA | hypothetical protein |
| BFnctc0853 CDS GFO/IDH/MOCA            | 2.8  | 1.0  | 12.9 | NA | NA | hypothetical protein |
| BFnctc1033 CDS GTase                   | 2.8  | 1.0  | 12.9 | NA | NA | hypothetical protein |
| BactD21104 CDS CDS                     | 4.5  | 1.6  | 12.9 | NA | NA | hypothetical protein |
| Bova2381 CDS CDS                       | 4.5  | 1.6  | 12.9 | NA | NA | hypothetical protein |
| BactD20603 CDS CDS                     | 1.4  | 0.5  | 12.8 | NA | NA | hypothetical protein |
| BFvch464184 CDS 30S                    | 4.2  | 1.5  | 12.8 | NA | NA | hypothetical protein |
| BFnctc4006 CDS 30S                     | 4.2  | 1.5  | 12.8 | NA | NA | hypothetical protein |
| TS29Fae03277 CDS CDS                   | 15.5 | 5.5  | 12.8 | NA | NA | hypothetical protein |
| TS28Fae12015 CDS CDS                   | 15.5 | 5.5  | 12.8 | NA | NA | hypothetical protein |
| TS29Rum16964 CDS CDS                   | 98.5 | 35.0 | 12.8 | NA | NA | hypothetical protein |
| BDI2760 CDS polynucleotide             | 16.8 | 6.0  | 12.7 | NA | NA | hypothetical protein |
| BFvch464183 CDS elongation             | 18.2 | 6.5  | 12.7 | NA | NA | hypothetical protein |
| FpraM2121831 CDS CDS                   | 14.0 | 5.0  | 12.7 | NA | NA | hypothetical protein |
| BDI3087 CDS putative                   | 14.0 | 5.0  | 12.7 | NA | NA | hypothetical protein |
| BDI2654 CDS hypothetical               | 7.0  | 2.5  | 12.7 | NA | NA | hypothetical protein |
| BDI2437 CDS hypothetical               | 7.0  | 2.5  | 12.7 | NA | NA | hypothetical protein |
| Buni1543 CDS CDS                       | 7.0  | 2.5  | 12.7 | NA | NA | hypothetical protein |
| BDI3003 CDS hypothetical               | 14.0 | 5.0  | 12.7 | NA | NA | hypothetical protein |
| BactD21953 CDS CDS                     | 14.0 | 5.0  | 12.7 | NA | NA | hypothetical protein |
| BDI1125 CDS Na(+)-translocating        | 14.0 | 5.0  | 12.7 | NA | NA | hypothetical protein |
| BDI2394 CDS ATP-dependent              | 28.0 | 10.0 | 12.7 | NA | NA | hypothetical protein |
| Dfor2606 CDS CDS                       | 1.4  | 0.5  | 12.7 | NA | NA | hypothetical protein |
| Msm0738 CDS preprotein                 | 0.7  | 0.3  | 12.7 | NA | NA | hypothetical protein |
| FpraM2121821 CDS CDS                   | 16.8 | 6.0  | 12.7 | NA | NA | hypothetical protein |
| Bxyl2955 CDS CDS                       | 19.5 | 7.0  | 12.6 | NA | NA | hypothetical protein |
| BDI0409 CDS hypothetical               | 12.5 | 4.5  | 12.6 | NA | NA | hypothetical protein |
| TS28Fae12105 CDS CDS                   | 12.5 | 4.5  | 12.6 | NA | NA | hypothetical protein |
| Bxyl3201 CDS CDS                       | 6.9  | 2.5  | 12.6 | NA | NA | hypothetical protein |
| BFvch464194 CDS 50S                    | 5.5  | 2.0  | 12.6 | NA | NA | hypothetical protein |
| b2283 CDS NADH:ubiquinone              | 5.5  | 2.0  | 12.5 | NA | NA | hypothetical protein |
| TS29Rum18719 CDS CDS                   | 11.0 | 4.0  | 12.5 | NA | NA | hypothetical protein |
| Bsp1163983 CDS CDS                     | 2.8  | 1.0  | 12.5 | NA | NA | hypothetical protein |
| Aput1496 CDS CDS                       | 11.0 | 4.0  | 12.5 | NA | NA | hypothetical protein |
| BDI1524 CDS hypothetical               | 11.0 | 4.0  | 12.5 | NA | NA | hypothetical protein |
| Buni1538 CDS CDS                       | 11.0 | 4.0  | 12.5 | NA | NA | hypothetical protein |
| TS29Rum14196 CDS CDS                   | 22.0 | 8.0  | 12.5 | NA | NA | hypothetical protein |
| Aput1935 CDS CDS                       | 11.0 | 4.0  | 12.5 | NA | NA | hypothetical protein |
| TS29Rum00263 CDS CDS                   | 11.0 | 4.0  | 12.5 | NA | NA | hypothetical protein |
| TS28Met0247 CDS CDS                    | 2.8  | 1.0  | 12.5 | NA | NA | hypothetical protein |
| TS28Clo06825 CDS CDS                   | 5.5  | 2.0  | 12.5 | NA | NA | hypothetical protein |
| TS29Ahi379 CDS CDS                     | 11.0 | 4.0  | 12.5 | NA | NA | hypothetical protein |
| BDI1553 CDS 1,4-dihydroxy-2-naphthoate | 11.0 | 4.0  | 12.5 | NA | NA | hypothetical protein |
| TS29Fae01564 CDS CDS                   | 11.0 | 4.0  | 12.5 | NA | NA | hypothetical protein |
| BDI0799 CDS DNA                        | 11.0 | 4.0  | 12.5 | NA | NA | hypothetical protein |
| BDI2862 CDS hypothetical               | 11.0 | 4.0  | 12.5 | NA | NA | hypothetical protein |
| Aput0608 CDS CDS                       | 16.5 | 6.0  | 12.5 | NA | NA | hypothetical protein |
| Aput1285 CDS CDS                       | 27.5 | 10.0 | 12.5 | NA | NA | hypothetical protein |
| TS29Bac03217 CDS CDS                   | 7.3  | 2.7  | 12.5 | NA | NA | hypothetical protein |
| TS29Bac02111 CDS CDS                   | 24.7 | 9.0  | 12.4 | NA | NA | hypothetical protein |
| BFvch464446 CDS phosphoenolpyruvate    | 12.3 | 4.5  | 12.4 | NA | NA | hypothetical protein |
| Begg0961 CDS CDS                       | 6.8  | 2.5  | 12.4 | NA | NA | hypothetical protein |
| TS28Rum13483 CDS CDS                   | 49.0 | 18.0 | 12.4 | NA | NA | hypothetical protein |
| BFvch463332 CDS pyruvate-flavodoxin    | 8.6  | 3.2  | 12.4 | NA | NA | hypothetical protein |
| BFvch463370 CDS hypothetical           | 9.5  | 3.5  | 12.3 | NA | NA | hypothetical protein |
| Chol1701 CDS CDS                       | 19.0 | 7.0  | 12.3 | NA | NA | hypothetical protein |
| Buni3051 CDS CDS                       | 9.5  | 3.5  | 12.3 | NA | NA | hypothetical protein |
| TS29Fae02498 CDS CDS                   | 9.5  | 3.5  | 12.3 | NA | NA | hypothetical protein |
| BFnctc3200 CDS putative                | 9.5  | 3.5  | 12.3 | NA | NA | hypothetical protein |
| RintL13322 CDS CDS                     | 0.5  | 0.2  | 12.3 | NA | NA | hypothetical protein |
| Bxyl4310 CDS CDS                       | 4.5  | 1.7  | 12.3 | NA | NA | hypothetical protein |
| TS29Bac07429 CDS CDS                   | 4.5  | 1.7  | 12.3 | NA | NA | hypothetical protein |
| Bova1547 CDS CDS                       | 1.4  | 0.5  | 12.3 | NA | NA | hypothetical protein |
| Msm0795 CDS heterodisulfide            | 7.0  | 2.6  | 12.2 | NA | NA | hypothetical protein |
| TS29Met0829 CDS CDS                    | 86.0 | 32.0 | 12.2 | NA | NA | hypothetical protein |
| Begg0964 CDS CDS                       | 2.7  | 1.0  | 12.1 | NA | NA | hypothetical protein |
| b3966 CDS vitamin                      | 2.7  | 1.0  | 12.1 | NA | NA | hypothetical protein |
| TS28Bac3208 CDS CDS                    | 2.7  | 1.0  | 12.1 | NA | NA | hypothetical protein |
| Dfor1980 CDS CDS                       | 1.3  | 0.5  | 12.1 | NA | NA | hypothetical protein |
| Msm0242 CDS exosome                    | 0.7  | 0.3  | 12.1 | NA | NA | hypothetical protein |
| Robe2314 CDS CDS                       | 1.3  | 0.5  | 12.1 | NA | NA | hypothetical protein |
| Rena2949 CDS CDS                       | 1.3  | 0.5  | 12.1 | NA | NA | hypothetical protein |
| Msm1137 CDS DNA                        | 1.2  | 0.5  | 12.1 | NA | NA | hypothetical protein |
| FpraM2120965 CDS CDS                   | 8.0  | 3.0  | 12.1 | NA | NA | hypothetical protein |
| BFvch462411 CDS DNA                    | 12.0 | 4.5  | 12.1 | NA | NA | hypothetical protein |
| FpraM2121503 CDS CDS                   | 16.0 | 6.0  | 12.1 | NA | NA | hypothetical protein |
| TS28Fae03741 CDS CDS                   | 8.0  | 3.0  | 12.1 | NA | NA | hypothetical protein |
| TS28Fae12539 CDS CDS                   | 8.0  | 3.0  | 12.1 | NA | NA | hypothetical protein |
| Aput1677 CDS CDS                       | 8.0  | 3.0  | 12.1 | NA | NA | hypothetical protein |
| b3940 CDS fused                        | 1.3  | 0.5  | 12.1 | NA | NA | hypothetical protein |
| TS29Clo3970 CDS CDS                    | 8.0  | 3.0  | 12.1 | NA | NA | hypothetical protein |
| TS28Clo02770 CDS CDS                   | 16.0 | 6.0  | 12.1 | NA | NA | hypothetical protein |
| BDI0091 CDS hypothetical               | 8.0  | 3.0  | 12.1 | NA | NA | hypothetical protein |
| TS28Bif0100 CDS CDS                    | 4.0  | 1.5  | 12.1 | NA | NA | hypothetical protein |

|                                  |      |      |      |    |    |                      |
|----------------------------------|------|------|------|----|----|----------------------|
| BFych464492/CDS/putative         | 4.0  | 1.5  | 12.1 | NA | NA | hypothetical protein |
| TS29Fae03298/CDS/CDS             | 16.0 | 6.0  | 12.1 | NA | NA | hypothetical protein |
| BFnctc3543/CDS/aconitate         | 4.0  | 1.5  | 12.1 | NA | NA | hypothetical protein |
| TS28Met0007/CDS/CDS              | 4.0  | 1.5  | 12.1 | NA | NA | hypothetical protein |
| BDI1693/CDS/conserved            | 8.0  | 3.0  | 12.1 | NA | NA | hypothetical protein |
| TS29Rum00813/CDS/CDS             | 8.0  | 3.0  | 12.1 | NA | NA | hypothetical protein |
| BFnctc2947/CDS/putative          | 4.0  | 1.5  | 12.1 | NA | NA | hypothetical protein |
| EUBREC0425/CDS/50S               | 5.3  | 2.0  | 12.1 | NA | NA | hypothetical protein |
| FpraM2120242/CDS/CDS             | 4.0  | 1.5  | 12.1 | NA | NA | hypothetical protein |
| TS28RumUnc1587/CDS/CDS           | 8.0  | 3.0  | 12.1 | NA | NA | hypothetical protein |
| Aput1878/CDS/CDS                 | 8.0  | 3.0  | 12.1 | NA | NA | hypothetical protein |
| TS29Bac11403/CDS/CDS             | 8.0  | 3.0  | 12.1 | NA | NA | hypothetical protein |
| BDI1035/CDS/hypothetical         | 8.0  | 3.0  | 12.1 | NA | NA | hypothetical protein |
| TS28Clo02623/CDS/CDS             | 8.0  | 3.0  | 12.1 | NA | NA | hypothetical protein |
| TS28Rum16259/CDS/CDS             | 4.0  | 1.5  | 12.1 | NA | NA | hypothetical protein |
| TS28Clo04812/CDS/CDS             | 2.0  | 0.8  | 12.1 | NA | NA | hypothetical protein |
| BFnctc1021/CDS/putative          | 4.0  | 1.5  | 12.1 | NA | NA | hypothetical protein |
| TS28Ali1989/CDS/CDS              | 5.3  | 2.0  | 12.1 | NA | NA | hypothetical protein |
| TS29Fae08739/CDS/CDS             | 5.3  | 2.0  | 12.1 | NA | NA | hypothetical protein |
| Msm0759/CDS/50S                  | 0.5  | 0.2  | 12.1 | NA | NA | hypothetical protein |
| BFnctc3785/CDS/30S               | 2.7  | 1.0  | 12.1 | NA | NA | hypothetical protein |
| BFnctc0497/CDS/hypothetical      | 1.3  | 0.5  | 12.1 | NA | NA | hypothetical protein |
| Msm1125/CDS/predicted            | 1.3  | 0.5  | 12.1 | NA | NA | hypothetical protein |
| TS28Bac3016/CDS/CDS              | 1.3  | 0.5  | 12.1 | NA | NA | hypothetical protein |
| Clep1567/CDS/CDS                 | 1.3  | 0.5  | 12.1 | NA | NA | hypothetical protein |
| BFnctc3817/CDS/hypothetical      | 1.3  | 0.5  | 12.1 | NA | NA | hypothetical protein |
| BFych462852/CDS/putative         | 57.2 | 21.6 | 12.0 | NA | NA | hypothetical protein |
| Msm1740853/CDS/CDS               | 3.1  | 1.2  | 12.0 | NA | NA | hypothetical protein |
| Msm1750833/CDS/CDS               | 3.1  | 1.2  | 12.0 | NA | NA | hypothetical protein |
| BFnctc2492/CDS/inegative         | 11.8 | 4.5  | 11.9 | NA | NA | hypothetical protein |
| Msm0436/CDS/V-type               | 1.8  | 0.7  | 11.9 | NA | NA | hypothetical protein |
| TS28Fae01246/CDS/CDS             | 21.0 | 8.0  | 11.9 | NA | NA | hypothetical protein |
| BDI1450/CDS/saccharopine         | 10.5 | 4.0  | 11.9 | NA | NA | hypothetical protein |
| BFych460569/CDS/hypothetical     | 10.5 | 4.0  | 11.9 | NA | NA | hypothetical protein |
| Msm0642/CDS/cell                 | 1.8  | 0.7  | 11.9 | NA | NA | hypothetical protein |
| Ccom1585/CDS/CDS                 | 7.8  | 3.0  | 11.9 | NA | NA | hypothetical protein |
| b0886/CDS/fused                  | 13.0 | 5.0  | 11.8 | NA | NA | hypothetical protein |
| TS29Bac07110/CDS/CDS             | 13.0 | 5.0  | 11.8 | NA | NA | hypothetical protein |
| TS29Fae03871/CDS/CDS             | 13.0 | 5.0  | 11.8 | NA | NA | hypothetical protein |
| BFych461018/CDS/putative         | 6.5  | 2.5  | 11.8 | NA | NA | hypothetical protein |
| BFych464079/CDS/IFKBP-type       | 5.2  | 2.0  | 11.8 | NA | NA | hypothetical protein |
| BDI0970/CDS/putative             | 13.0 | 5.0  | 11.8 | NA | NA | hypothetical protein |
| TS29Bac08197/CDS/CDS             | 13.0 | 5.0  | 11.8 | NA | NA | hypothetical protein |
| Bste2291/CDS/CDS                 | 2.6  | 1.0  | 11.8 | NA | NA | hypothetical protein |
| Msm1616/CDS/hypothetical         | 0.7  | 0.3  | 11.8 | NA | NA | hypothetical protein |
| TS29Dor1749/CDS/CDS              | 13.0 | 5.0  | 11.8 | NA | NA | hypothetical protein |
| BDI1504/CDS/hypothetical         | 13.0 | 5.0  | 11.8 | NA | NA | hypothetical protein |
| Aput0967/CDS/CDS                 | 13.0 | 5.0  | 11.8 | NA | NA | hypothetical protein |
| Aput0615/CDS/CDS                 | 13.0 | 5.0  | 11.8 | NA | NA | hypothetical protein |
| BFnctc3904/CDS/3-oxoacetyl-(acyl | 6.5  | 2.5  | 11.8 | NA | NA | hypothetical protein |
| b0014/CDS/chaperone              | 5.2  | 2.0  | 11.7 | NA | NA | hypothetical protein |
| BT1953/CDS/putative              | 5.1  | 2.0  | 11.7 | NA | NA | hypothetical protein |
| BFych463029/CDS/putative         | 5.1  | 2.0  | 11.7 | NA | NA | hypothetical protein |
| Bste0641/CDS/CDS                 | 5.2  | 2.0  | 11.7 | NA | NA | hypothetical protein |
| TS28Rum14941/CDS/CDS             | 24.5 | 9.5  | 11.7 | NA | NA | hypothetical protein |
| TS29Rum04362/CDS/CDS             | 33.5 | 13.0 | 11.7 | NA | NA | hypothetical protein |
| TS29Rum20570/CDS/CDS             | 18.0 | 7.0  | 11.7 | NA | NA | hypothetical protein |
| TS29Rum16602/CDS/CDS             | 18.0 | 7.0  | 11.7 | NA | NA | hypothetical protein |
| BFnctc0021/CDS/putative          | 9.0  | 3.5  | 11.7 | NA | NA | hypothetical protein |
| FpraM2120937/CDS/CDS             | 2.6  | 1.0  | 11.7 | NA | NA | hypothetical protein |
| Rtor0135/CDS/CDS                 | 29.5 | 11.5 | 11.6 | NA | NA | hypothetical protein |
| BDI0389/CDS/malate               | 10.3 | 4.0  | 11.6 | NA | NA | hypothetical protein |
| TS28Fae17103/CDS/CDS             | 3.8  | 1.5  | 11.6 | NA | NA | hypothetical protein |
| TS29Fae09430/CDS/CDS             | 3.8  | 1.5  | 11.6 | NA | NA | hypothetical protein |
| BFnctc3769/CDS/hypothetical      | 3.8  | 1.5  | 11.6 | NA | NA | hypothetical protein |
| BFych463994/CDS/Mrp/Nbp35        | 3.8  | 1.5  | 11.6 | NA | NA | hypothetical protein |
| TS29Dor1444/CDS/CDS              | 25.5 | 10.0 | 11.6 | NA | NA | hypothetical protein |
| BT2705/CDS/translation           | 0.6  | 0.3  | 11.5 | NA | NA | hypothetical protein |
| RintL13425/CDS/CDS               | 52.0 | 20.5 | 11.5 | NA | NA | hypothetical protein |
| BactD13738/CDS/CDS               | 1.3  | 0.5  | 11.5 | NA | NA | hypothetical protein |
| Bxyl1523/CDS/CDS                 | 2.5  | 1.0  | 11.5 | NA | NA | hypothetical protein |
| Msm0435/CDS/V-type               | 3.5  | 1.4  | 11.5 | NA | NA | hypothetical protein |
| Bega0849/CDS/CDS                 | 5.2  | 2.1  | 11.4 | NA | NA | hypothetical protein |
| BFnctc3472/CDS/hypothetical      | 1.7  | 0.7  | 11.3 | NA | NA | hypothetical protein |
| TS28Bac4186/CDS/CDS              | 1.7  | 0.7  | 11.3 | NA | NA | hypothetical protein |
| Bum12974/CDS/CDS                 | 1.7  | 0.7  | 11.3 | NA | NA | hypothetical protein |
| TS29Bac05921/CDS/CDS             | 1.7  | 0.7  | 11.3 | NA | NA | hypothetical protein |
| BFych463675/CDS/hypothetical     | 1.7  | 0.7  | 11.3 | NA | NA | hypothetical protein |
| Msm1751652/CDS/CDS               | 1.7  | 0.7  | 11.3 | NA | NA | hypothetical protein |
| Msm1740158/CDS/CDS               | 1.7  | 0.7  | 11.3 | NA | NA | hypothetical protein |
| TS28Met0053/CDS/CDS              | 1.7  | 0.7  | 11.3 | NA | NA | hypothetical protein |
| Bpse1518/CDS/CDS                 | 0.8  | 0.3  | 11.3 | NA | NA | hypothetical protein |
| b0700/CDS/rhsC                   | 5.0  | 2.0  | 11.3 | NA | NA | hypothetical protein |
| Msm1223/CDS/carbonyl             | 1.3  | 0.5  | 11.3 | NA | NA | hypothetical protein |
| b2463/CDS/fused                  | 2.5  | 1.0  | 11.3 | NA | NA | hypothetical protein |
| BFnctc1713/CDS/hypothetical      | 2.5  | 1.0  | 11.3 | NA | NA | hypothetical protein |
| TS29Rum04367/CDS/CDS             | 5.0  | 2.0  | 11.3 | NA | NA | hypothetical protein |
| TS28RumUnc0349/CDS/CDS           | 10.0 | 4.0  | 11.3 | NA | NA | hypothetical protein |
| b2933/CDS/predicted              | 2.5  | 1.0  | 11.3 | NA | NA | hypothetical protein |
| Msm0708/CDS/hypothetical         | 1.3  | 0.5  | 11.3 | NA | NA | hypothetical protein |
| ShigspD91786/CDS/CDS             | 5.0  | 2.0  | 11.3 | NA | NA | hypothetical protein |
| TS28Clo06159/CDS/CDS             | 2.5  | 1.0  | 11.3 | NA | NA | hypothetical protein |
| b1129/CDS/sensory                | 2.5  | 1.0  | 11.3 | NA | NA | hypothetical protein |
| Aput0913/CDS/CDS                 | 5.0  | 2.0  | 11.3 | NA | NA | hypothetical protein |
| TS29Bac09447/CDS/CDS             | 20.0 | 8.0  | 11.3 | NA | NA | hypothetical protein |
| TS28Rum03425/CDS/CDS             | 2.5  | 1.0  | 11.3 | NA | NA | hypothetical protein |

|                                                |      |      |      |    |    |                      |
|------------------------------------------------|------|------|------|----|----|----------------------|
| TS28Fae21756/CDS/CDS                           | 5.0  | 2.0  | 11.3 | NA | NA | hypothetical protein |
| BFnctc0185/CDS/putative                        | 2.5  | 1.0  | 11.3 | NA | NA | hypothetical protein |
| BFych463811/CDS/glycerol-3-phosphate           | 2.5  | 1.0  | 11.3 | NA | NA | hypothetical protein |
| Bova3954/CDS/CDS                               | 0.5  | 0.2  | 11.3 | NA | NA | hypothetical protein |
| TS29Dor1757/CDS/CDS                            | 5.0  | 2.0  | 11.3 | NA | NA | hypothetical protein |
| Buni1747/CDS/CDS                               | 5.0  | 2.0  | 11.3 | NA | NA | hypothetical protein |
| TS29Clo0345/CDS/CDS                            | 5.0  | 2.0  | 11.3 | NA | NA | hypothetical protein |
| RintL10294/CDS/CDS                             | 5.0  | 2.0  | 11.3 | NA | NA | hypothetical protein |
| BFnctc2072/CDS/phosphoserine                   | 5.0  | 2.0  | 11.3 | NA | NA | hypothetical protein |
| BFnctc2659/CDS/putative                        | 2.5  | 1.0  | 11.3 | NA | NA | hypothetical protein |
| TS29Bac07320/CDS/CDS                           | 2.5  | 1.0  | 11.3 | NA | NA | hypothetical protein |
| BFvch461054/CDS/putative                       | 2.5  | 1.0  | 11.3 | NA | NA | hypothetical protein |
| BDI1653/CDS/hypothetical                       | 5.0  | 2.0  | 11.3 | NA | NA | hypothetical protein |
| Cbol4161/CDS/CDS                               | 5.0  | 2.0  | 11.3 | NA | NA | hypothetical protein |
| FpraM2120339/CDS/CDS                           | 2.5  | 1.0  | 11.3 | NA | NA | hypothetical protein |
| Cbol4423/CDS/CDS                               | 5.0  | 2.0  | 11.3 | NA | NA | hypothetical protein |
| TS28Rum15552/CDS/CDS                           | 2.5  | 1.0  | 11.3 | NA | NA | hypothetical protein |
| Beap0852/CDS/CDS                               | 2.5  | 1.0  | 11.3 | NA | NA | hypothetical protein |
| TS29Ram05236/CDS/CDS                           | 2.5  | 1.0  | 11.3 | NA | NA | hypothetical protein |
| BFvch461046/CDS/hypothetical                   | 2.5  | 1.0  | 11.3 | NA | NA | hypothetical protein |
| BDI3552/CDS/30S                                | 5.0  | 2.0  | 11.3 | NA | NA | hypothetical protein |
| Msm1471/CDS/laclv-CoA                          | 1.3  | 0.5  | 11.3 | NA | NA | hypothetical protein |
| b2942/CDS/methionine                           | 2.5  | 1.0  | 11.3 | NA | NA | hypothetical protein |
| BFnctc3257/CDS/hypothetical                    | 5.0  | 2.0  | 11.3 | NA | NA | hypothetical protein |
| Dfor2068/CDS/CDS                               | 2.5  | 1.0  | 11.3 | NA | NA | hypothetical protein |
| M23Apeg3632/CDS/Electron                       | 5.0  | 2.0  | 11.3 | NA | NA | hypothetical protein |
| TS29Ram04463/CDS/CDS                           | 5.0  | 2.0  | 11.3 | NA | NA | hypothetical protein |
| BDI2172/CDS/putative                           | 5.0  | 2.0  | 11.3 | NA | NA | hypothetical protein |
| Pmer3505/CDS/CDS                               | 2.5  | 1.0  | 11.3 | NA | NA | hypothetical protein |
| TS28Clo05916/CDS/CDS                           | 5.0  | 2.0  | 11.3 | NA | NA | hypothetical protein |
| BDI1480/CDS/fructose-bisphosphate              | 5.0  | 2.0  | 11.3 | NA | NA | hypothetical protein |
| BDI0668/CDS/hypothetical                       | 5.0  | 2.0  | 11.3 | NA | NA | hypothetical protein |
| BDI1483/CDS/putative                           | 5.0  | 2.0  | 11.3 | NA | NA | hypothetical protein |
| BDI2029/CDS/hypothetical                       | 5.0  | 2.0  | 11.3 | NA | NA | hypothetical protein |
| BFvch460028/CDS/hypothetical                   | 2.5  | 1.0  | 11.3 | NA | NA | hypothetical protein |
| BFnctc0997/CDS/putative                        | 2.5  | 1.0  | 11.3 | NA | NA | hypothetical protein |
| BDI1304/CDS/hypothetical                       | 5.0  | 2.0  | 11.3 | NA | NA | hypothetical protein |
| TS29Fae09664/CDS/CDS                           | 5.0  | 2.0  | 11.3 | NA | NA | hypothetical protein |
| EUBREC2568/CDS/hypothetical                    | 5.0  | 2.0  | 11.3 | NA | NA | hypothetical protein |
| BactD24510/CDS/CDS                             | 5.0  | 2.0  | 11.3 | NA | NA | hypothetical protein |
| BactD23564/CDS/CDS                             | 2.5  | 1.0  | 11.3 | NA | NA | hypothetical protein |
| TS29Fae02625/CDS/CDS                           | 2.5  | 1.0  | 11.3 | NA | NA | hypothetical protein |
| Cbol3708/CDS/CDS                               | 5.0  | 2.0  | 11.3 | NA | NA | hypothetical protein |
| b3243/CDS/predicted                            | 2.5  | 1.0  | 11.3 | NA | NA | hypothetical protein |
| Aput1852/CDS/CDS                               | 5.0  | 2.0  | 11.3 | NA | NA | hypothetical protein |
| BFych461080/CDS/4-hydroxythreonine-4-phosphate | 2.5  | 1.0  | 11.3 | NA | NA | hypothetical protein |
| TS29Bac07334/CDS/CDS                           | 10.0 | 4.0  | 11.3 | NA | NA | hypothetical protein |
| Aput2068/CDS/CDS                               | 5.0  | 2.0  | 11.3 | NA | NA | hypothetical protein |
| TS29Fae06602/CDS/CDS                           | 5.0  | 2.0  | 11.3 | NA | NA | hypothetical protein |
| BDI0918/CDS/putative                           | 5.0  | 2.0  | 11.3 | NA | NA | hypothetical protein |
| TS29Ram20257/CDS/CDS                           | 5.0  | 2.0  | 11.3 | NA | NA | hypothetical protein |
| RintL13873/CDS/CDS                             | 2.5  | 1.0  | 11.3 | NA | NA | hypothetical protein |
| b0146/CDS/predicted                            | 2.5  | 1.0  | 11.3 | NA | NA | hypothetical protein |
| TS29Ram14846/CDS/CDS                           | 5.0  | 2.0  | 11.3 | NA | NA | hypothetical protein |
| BFych460660/CDS/hypothetical                   | 2.5  | 1.0  | 11.3 | NA | NA | hypothetical protein |
| TS28Dor1150/CDS/CDS                            | 5.0  | 2.0  | 11.3 | NA | NA | hypothetical protein |
| BFnctc0962/CDS/hypothetical                    | 2.5  | 1.0  | 11.3 | NA | NA | hypothetical protein |
| TS29Fae01703/CDS/CDS                           | 2.5  | 1.0  | 11.3 | NA | NA | hypothetical protein |
| Buni3225/CDS/CDS                               | 2.5  | 1.0  | 11.3 | NA | NA | hypothetical protein |
| BI0852/CDS/branched-chain                      | 0.5  | 0.2  | 11.3 | NA | NA | hypothetical protein |
| M23Apeg2918/CDS/Chaperone                      | 5.0  | 2.0  | 11.3 | NA | NA | hypothetical protein |
| Rgna3674/CDS/CDS                               | 5.0  | 2.0  | 11.3 | NA | NA | hypothetical protein |
| TS28Rum00669/CDS/CDS                           | 32.5 | 13.0 | 11.3 | NA | NA | hypothetical protein |
| M23Apeg4097/CDS/hypothetical                   | 5.0  | 2.0  | 11.3 | NA | NA | hypothetical protein |
| BFnctc2006/CDS/hypothetical                    | 2.5  | 1.0  | 11.3 | NA | NA | hypothetical protein |
| BDI2997/CDS/hypothetical                       | 2.5  | 1.0  | 11.3 | NA | NA | hypothetical protein |
| Msm1609/CDS/molybdate                          | 0.5  | 0.2  | 11.3 | NA | NA | hypothetical protein |
| TS28Rum09491/CDS/CDS                           | 5.0  | 2.0  | 11.3 | NA | NA | hypothetical protein |
| TS29Clo2799/CDS/CDS                            | 5.0  | 2.0  | 11.3 | NA | NA | hypothetical protein |
| TS29Clo4086/CDS/CDS                            | 2.5  | 1.0  | 11.3 | NA | NA | hypothetical protein |
| Ccom0909/CDS/CDS                               | 5.0  | 2.0  | 11.3 | NA | NA | hypothetical protein |
| TS28Fae15346/CDS/CDS                           | 5.0  | 2.0  | 11.3 | NA | NA | hypothetical protein |
| BDI2267/CDS/50S                                | 10.0 | 4.0  | 11.3 | NA | NA | hypothetical protein |
| Bbre0640/CDS/CDS                               | 5.0  | 2.0  | 11.3 | NA | NA | hypothetical protein |
| BactD13192/CDS/CDS                             | 2.5  | 1.0  | 11.3 | NA | NA | hypothetical protein |
| TS29Ram19939/CDS/CDS                           | 5.0  | 2.0  | 11.3 | NA | NA | hypothetical protein |
| BFnctc3529/CDS/hypothetical                    | 2.5  | 1.0  | 11.3 | NA | NA | hypothetical protein |
| BFnctc2941/CDS/hypothetical                    | 2.5  | 1.0  | 11.3 | NA | NA | hypothetical protein |
| TS28Rum14406/CDS/CDS                           | 2.5  | 1.0  | 11.3 | NA | NA | hypothetical protein |
| BDI2560/CDS/hypothetical                       | 5.0  | 2.0  | 11.3 | NA | NA | hypothetical protein |
| BFvch463369/CDS/hypothetical                   | 10.0 | 4.0  | 11.3 | NA | NA | hypothetical protein |
| BDI1233/CDS/hypothetical                       | 5.0  | 2.0  | 11.3 | NA | NA | hypothetical protein |
| TS28Rum04462/CDS/CDS                           | 2.5  | 1.0  | 11.3 | NA | NA | hypothetical protein |
| TS28Rum11941/CDS/CDS                           | 10.0 | 4.0  | 11.3 | NA | NA | hypothetical protein |
| b4382/CDS/hvmidine                             | 2.5  | 1.0  | 11.3 | NA | NA | hypothetical protein |
| TS29Bac05568/CDS/CDS                           | 15.0 | 6.0  | 11.3 | NA | NA | hypothetical protein |
| BDI0796/CDS/sulfate                            | 15.0 | 6.0  | 11.3 | NA | NA | hypothetical protein |
| BL1344/CDS/N-acetylglucosamine-6-phosphate     | 3.8  | 1.5  | 11.3 | NA | NA | hypothetical protein |
| TS28Fae08036/CDS/CDS                           | 7.5  | 3.0  | 11.3 | NA | NA | hypothetical protein |
| Buni0708/CDS/CDS                               | 3.8  | 1.5  | 11.3 | NA | NA | hypothetical protein |
| BFnctc4168/CDS/putative                        | 7.5  | 3.0  | 11.3 | NA | NA | hypothetical protein |
| Aput0431/CDS/CDS                               | 15.0 | 6.0  | 11.3 | NA | NA | hypothetical protein |
| BFnctc3207/CDS/putative                        | 12.5 | 5.0  | 11.3 | NA | NA | hypothetical protein |

|                                                  |             |      |             |    |    |                      |
|--------------------------------------------------|-------------|------|-------------|----|----|----------------------|
| TS28Rum00558/CDS/CDS                             | 7.5         | 3.0  | 11.3        | NA | NA | hypothetical protein |
| BFvch464037/CDS/major                            | 1.7         | 0.7  | 11.3        | NA | NA | hypothetical protein |
| BFncet4014/CDS/DNA-directed                      | 27.4        | 11.0 | 11.3        | NA | NA | hypothetical protein |
| TS29Bac04457/CDS/CDS                             | 19.8        | 8.0  | 11.3        | NA | NA | hypothetical protein |
| Caer1086/CDS/CDS                                 | 8.7         | 3.5  | 11.2        | NA | NA | hypothetical protein |
| Buni2580/CDS/CDS                                 | 11.1        | 4.5  | 11.2        | NA | NA | hypothetical protein |
| TS29Bac02536/CDS/CDS                             | 11.1        | 4.5  | 11.2        | NA | NA | hypothetical protein |
| BFvch462171/CDS/F0F1                             | 11.1        | 4.5  | 11.2        | NA | NA | hypothetical protein |
| BFvch463800/CDS/methylmalonyl-CoA                | 6.2         | 2.5  | 11.2        | NA | NA | hypothetical protein |
| BFvch463812/CDS/glucose-6-phosphate              | 6.2         | 2.5  | 11.2        | NA | NA | hypothetical protein |
| FpraM2121622/CDS/CDS                             | 5.8         | 2.3  | 11.2        | NA | NA | hypothetical protein |
| BFvch463206/CDS/hypothetical                     | 3.7         | 1.5  | 11.2        | NA | NA | hypothetical protein |
| BFvch460254/CDS/L-1,2-propanediol                | 4.5         | 1.8  | 11.1        | NA | NA | hypothetical protein |
| Rbro0653/CDS/CDS                                 | 2.5         | 1.0  | 11.1        | NA | NA | hypothetical protein |
| BFncet3787/CDS/S0S                               | 3.7         | 1.5  | 11.1        | NA | NA | hypothetical protein |
| TS28Fae02988/CDS/CDS                             | 3.7         | 1.5  | 11.1        | NA | NA | hypothetical protein |
| FpraM2120344/CDS/CDS                             | 11.0        | 4.5  | 11.1        | NA | NA | hypothetical protein |
| BDI1479/CDS/putative                             | 7.3         | 3.0  | 11.1        | NA | NA | hypothetical protein |
| BFvch463164/CDS/hypothetical                     | 7.3         | 3.0  | 11.1        | NA | NA | hypothetical protein |
| BDI0236/CDS/N-acetylglucosamine-6-phosphate      | 19.5        | 8.0  | 11.1        | NA | NA | hypothetical protein |
| TS29Bac04333/CDS/CDS                             | 12.2        | 5.0  | 11.1        | NA | NA | hypothetical protein |
| TS28Clo08175/CDS/CDS                             | 5.7         | 2.3  | 11.0        | NA | NA | hypothetical protein |
| FpraM2120328/CDS/CDS                             | 17.0        | 7.0  | 11.0        | NA | NA | hypothetical protein |
| BDI3591/CDS/TPR-domain                           | 17.0        | 7.0  | 11.0        | NA | NA | hypothetical protein |
| Aput0529/CDS/CDS                                 | 17.0        | 7.0  | 11.0        | NA | NA | hypothetical protein |
| BL1640/CDS/permease                              | 1.7         | 0.7  | 11.0        | NA | NA | hypothetical protein |
| Bthe7332530/CDS/CDS                              | 5.2         | 2.1  | 11.0        | NA | NA | hypothetical protein |
| Bthe3733900/CDS/CDS                              | 5.2         | 2.1  | 11.0        | NA | NA | hypothetical protein |
| Bova1802/CDS/CDS                                 | 1.2         | 0.5  | 11.0        | NA | NA | hypothetical protein |
| BL0279/CDS/glucose-6-phosphate                   | 4.2         | 1.8  | 11.0        | NA | NA | hypothetical protein |
| FpraM2122077/CDS/CDS                             | 47.2        | 19.5 | 11.0        | NA | NA | hypothetical protein |
| Bste2507/CDS/CDS                                 | 2.4         | 1.0  | 11.0        | NA | NA | hypothetical protein |
| Msm0197/CDS/DNA-directed                         | 0.8         | 0.3  | 10.9        | NA | NA | hypothetical protein |
| Msm1233/CDS/glutamate-1-semialdehyde             | 0.8         | 0.3  | 10.9        | NA | NA | hypothetical protein |
| BFncet3560/CDS/hypothetical                      | 2.0         | 0.8  | 10.9        | NA | NA | hypothetical protein |
| BFvch461690/CDS/S0S                              | 2.0         | 0.8  | 10.9        | NA | NA | hypothetical protein |
| BLD0267/CDS/hypothetical                         | 2.0         | 0.8  | 10.9        | NA | NA | hypothetical protein |
| BFncet1697/CDS/S0S                               | 2.0         | 0.8  | 10.9        | NA | NA | hypothetical protein |
| TS28Fae18606/CDS/CDS                             | 2.0         | 0.8  | 10.9        | NA | NA | hypothetical protein |
| Msm0739/CDS/S0S                                  | 1.2         | 0.5  | 10.9        | NA | NA | hypothetical protein |
| BFvch462731/CDS/IV-type                          | 1.2         | 0.5  | 10.9        | NA | NA | hypothetical protein |
| Buni2753/CDS/CDS                                 | 6.0         | 2.5  | 10.9        | NA | NA | hypothetical protein |
| BDI3208/CDS/succinate                            | 12.0        | 5.0  | 10.9        | NA | NA | hypothetical protein |
| BDI0474/CDS/glycoside                            | 12.0        | 5.0  | 10.9        | NA | NA | hypothetical protein |
| BDI3592/CDS/putative                             | 12.0        | 5.0  | 10.9        | NA | NA | hypothetical protein |
| BDI1729/CDS/ATP-dependent                        | 12.0        | 5.0  | 10.9        | NA | NA | hypothetical protein |
| TS28Col1508/CDS/CDS                              | 12.0        | 5.0  | 10.9        | NA | NA | hypothetical protein |
| Buni1594/CDS/CDS                                 | 12.0        | 5.0  | 10.9        | NA | NA | hypothetical protein |
| BVU2185/CDS/hypothetical                         | 12.0        | 5.0  | 10.9        | NA | NA | hypothetical protein |
| TS29Rum14637/CDS/CDS                             | 36.0        | 15.0 | 10.9        | NA | NA | hypothetical protein |
| Msm0055/CDS/3-dehydroquinate                     | 3.0         | 1.3  | 10.9        | NA | NA | hypothetical protein |
| BFvch463305/CDS/hypothetical                     | 6.0         | 2.5  | 10.9        | NA | NA | hypothetical protein |
| TS28Fae22715/CDS/CDS                             | 45.5        | 19.0 | 10.9        | NA | NA | hypothetical protein |
| b2557/CDS/phosphoribosylformyl-glycineamide      | 7.2         | 3.0  | 10.8        | NA | NA | hypothetical protein |
| BDI3672/CDS/putative                             | 43.0        | 18.0 | 10.8        | NA | NA | hypothetical protein |
| BFvch463421/CDS/adenylosuccinate                 | 4.8         | 2.0  | 10.8        | NA | NA | hypothetical protein |
| BL0415/CDS/single-strand                         | 4.8         | 2.0  | 10.8        | NA | NA | hypothetical protein |
| TS28Rum07936/CDS/CDS                             | 9.5         | 4.0  | 10.8        | NA | NA | hypothetical protein |
| TS29Fae07945/CDS/CDS                             | 9.5         | 4.0  | 10.8        | NA | NA | hypothetical protein |
| TS29Par768/CDS/CDS                               | 19.0        | 8.0  | 10.8        | NA | NA | hypothetical protein |
| BDI0232/CDS/putative                             | 19.0        | 8.0  | 10.8        | NA | NA | hypothetical protein |
| TS29Bac00414/CDS/CDS                             | 28.5        | 12.0 | 10.8        | NA | NA | hypothetical protein |
| BFncet4003/CDS/S0S                               | 3.6         | 1.5  | 10.8        | NA | NA | hypothetical protein |
| BFvch464181/CDS/S0S                              | 3.6         | 1.5  | 10.8        | NA | NA | hypothetical protein |
| FpraM2122376/CDS/CDS                             | 2.4         | 1.0  | 10.7        | NA | NA | hypothetical protein |
| TS28Rum13300/CDS/CDS                             | 13.0        | 5.5  | 10.7        | NA | NA | hypothetical protein |
| TS28Fae21067/CDS/CDS                             | 17.7        | 7.5  | 10.7        | NA | NA | hypothetical protein |
| Bova2001/CDS/CDS                                 | 1.2         | 0.5  | 10.7        | NA | NA | hypothetical protein |
| FpraM2122078/CDS/CDS                             | 35.2        | 15.0 | 10.6        | NA | NA | hypothetical protein |
| BFvch464205/CDS/3-deoxy-D-manno-octulosonic-acid | 1.2         | 0.5  | 10.6        | NA | NA | hypothetical protein |
| BFncet0991/CDS/hypothetical                      | 1.166666667 | 0.5  | 10.59281705 | NA | NA | hypothetical protein |
| BactD21926/CDS/CDS                               | 1.166666667 | 0.5  | 10.59281705 | NA | NA | hypothetical protein |
| BFncet3144/CDS/putative                          | 3.5         | 1.5  | 10.59281705 | NA | NA | hypothetical protein |
| BactD13946/CDS/CDS                               | 9.333333333 | 4    | 10.59281705 | NA | NA | hypothetical protein |
| TS29Bac07795/CDS/CDS                             | 9.333333333 | 4    | 10.59281705 | NA | NA | hypothetical protein |
| TS29Rum01606/CDS/CDS                             | 21          | 9    | 10.59281705 | NA | NA | hypothetical protein |
| BDI0181/CDS/TPR                                  | 21          | 9    | 10.59281705 | NA | NA | hypothetical protein |
| TS28Bac4096/CDS/CDS                              | 2.333333333 | 1    | 10.59281705 | NA | NA | hypothetical protein |
| BFncet3982/CDS/putative                          | 7           | 3    | 10.59281705 | NA | NA | hypothetical protein |
| BDI3169/CDS/RNA                                  | 7           | 3    | 10.59281705 | NA | NA | hypothetical protein |
| Aput0925/CDS/CDS                                 | 7           | 3    | 10.59281705 | NA | NA | hypothetical protein |
| BDI3578/CDS/phosphoribosylglycinamide            | 7           | 3    | 10.59281705 | NA | NA | hypothetical protein |
| BFvch462238/CDS/hypothetical                     | 3.5         | 1.5  | 10.59281705 | NA | NA | hypothetical protein |
| Aput0088/CDS/CDS                                 | 14          | 6    | 10.59281705 | NA | NA | hypothetical protein |
| TS28Bif3516/CDS/CDS                              | 35          | 15   | 10.59281705 | NA | NA | hypothetical protein |
| Buni1445/CDS/CDS                                 | 3.5         | 1.5  | 10.59281705 | NA | NA | hypothetical protein |
| Aput1290/CDS/CDS                                 | 7           | 3    | 10.59281705 | NA | NA | hypothetical protein |
| BDI2911/CDS/putative                             | 7           | 3    | 10.59281705 | NA | NA | hypothetical protein |
| TS28Fae00786/CDS/CDS                             | 7           | 3    | 10.59281705 | NA | NA | hypothetical protein |
| BDI1014/CDS/formate-tetrahydrofolate             | 7           | 3    | 10.59281705 | NA | NA | hypothetical protein |
| TS29Rum05023/CDS/CDS                             | 7           | 3    | 10.59281705 | NA | NA | hypothetical protein |

|                                         |              |             |             |    |    |                      |
|-----------------------------------------|--------------|-------------|-------------|----|----|----------------------|
| FpraM2122495/CDS/CDS                    | 7            | 3           | 10.59281705 | NA | NA | hypothetical protein |
| b3771/CDS/dihydroxyacid                 | 2.333333333  | 1           | 10.59281705 | NA | NA | hypothetical protein |
| BactD21067/CDS/CDS                      | 7            | 3           | 10.59281705 | NA | NA | hypothetical protein |
| BFnctc0723/CDS/AraC                     | 3.5          | 1.5         | 10.59281705 | NA | NA | hypothetical protein |
| BFych460222/CDS/erythronate-4-phosphate | 3.5          | 1.5         | 10.59281705 | NA | NA | hypothetical protein |
| BDI2110/CDS/hypothetical                | 7            | 3           | 10.59281705 | NA | NA | hypothetical protein |
| BFych460236/CDS/hypothetical            | 3.5          | 1.5         | 10.59281705 | NA | NA | hypothetical protein |
| TS28Bac3487/CDS/CDS                     | 7            | 3           | 10.59281705 | NA | NA | hypothetical protein |
| Bum1047/CDS/CDS                         | 2.333333333  | 1           | 10.59281705 | NA | NA | hypothetical protein |
| TS29Fae04137/CDS/CDS                    | 7            | 3           | 10.59281705 | NA | NA | hypothetical protein |
| Msm1740675/CDS/CDS                      | 3.5          | 1.5         | 10.59281705 | NA | NA | hypothetical protein |
| Aput0312/CDS/CDS                        | 7            | 3           | 10.59281705 | NA | NA | hypothetical protein |
| Rintl_10399/CDS/CDS                     | 7            | 3           | 10.59281705 | NA | NA | hypothetical protein |
| BFych464072/CDS/peptidyl-prolyl         | 3.5          | 1.5         | 10.59281705 | NA | NA | hypothetical protein |
| TS28Fae21290/CDS/CDS                    | 7            | 3           | 10.59281705 | NA | NA | hypothetical protein |
| BDI1385/CDS/two-component               | 7            | 3           | 10.59281705 | NA | NA | hypothetical protein |
| BDI0625/CDS/hypothetical                | 7            | 3           | 10.59281705 | NA | NA | hypothetical protein |
| BDI2269/CDS/transcription               | 7            | 3           | 10.59281705 | NA | NA | hypothetical protein |
| BFnctc3922/CDS/hypothetical             | 7            | 3           | 10.59281705 | NA | NA | hypothetical protein |
| BDI1687/CDS/putative                    | 3.5          | 1.5         | 10.59281705 | NA | NA | hypothetical protein |
| BFych463593/CDS/putative                | 3.5          | 1.5         | 10.59281705 | NA | NA | hypothetical protein |
| BDI0050/CDS/glycoside                   | 7            | 3           | 10.59281705 | NA | NA | hypothetical protein |
| BactD21950/CDS/CDS                      | 7            | 3           | 10.59281705 | NA | NA | hypothetical protein |
| TS29Rum19986/CDS/CDS                    | 3.5          | 1.5         | 10.59281705 | NA | NA | hypothetical protein |
| Msm1278/CDS/predicted                   | 0.583333333  | 0.25        | 10.59281705 | NA | NA | hypothetical protein |
| Bova0453/CDS/CDS                        | 2.333333333  | 1           | 10.59281705 | NA | NA | hypothetical protein |
| Cmet0498/CDS/CDS                        | 2.333333333  | 1           | 10.59281705 | NA | NA | hypothetical protein |
| BFych460662/CDS/hypothetical            | 2.333333333  | 1           | 10.59281705 | NA | NA | hypothetical protein |
| BFnctc1290/CDS/glycine                  | 2.333333333  | 1           | 10.59281705 | NA | NA | hypothetical protein |
| FpraM2120335/CDS/CDS                    | 2.333333333  | 1           | 10.59281705 | NA | NA | hypothetical protein |
| TS28Fae17837/CDS/CDS                    | 18.5         | 8           | 10.49823833 | NA | NA | hypothetical protein |
| BFych463858/CDS/hypothetical            | 2.30952381   | 1           | 10.48472708 | NA | NA | hypothetical protein |
| BFnctc3629/CDS/hypothetical             | 2.30952381   | 1           | 10.48472708 | NA | NA | hypothetical protein |
| TS28Eub5026/CDS/CDS                     | 1.533333333  | 0.666666667 | 10.44149109 | NA | NA | hypothetical protein |
| BDI1878/CDS/hypothetical                | 11.5         | 5           | 10.44149109 | NA | NA | hypothetical protein |
| Aput0473/CDS/CDS                        | 11.5         | 5           | 10.44149109 | NA | NA | hypothetical protein |
| Msm0743/CDS/SOS                         | 1.533333333  | 0.666666667 | 10.44149109 | NA | NA | hypothetical protein |
| Bxyl1991/CDS/CDS                        | 4.583333333  | 2           | 10.4036596  | NA | NA | hypothetical protein |
| BFnctc2567/CDS/pyruvate                 | 9.166666667  | 4           | 10.4036596  | NA | NA | hypothetical protein |
| TS29Fae00069/CDS/CDS                    | 4.583333333  | 2           | 10.4036596  | NA | NA | hypothetical protein |
| BDI2724/CDS/hypothetical                | 16           | 7           | 10.37663711 | NA | NA | hypothetical protein |
| BDI3765/CDS/elongation                  | 16           | 7           | 10.37663711 | NA | NA | hypothetical protein |
| Rtor1383/CDS/CDS                        | 32           | 14          | 10.37663711 | NA | NA | hypothetical protein |
| Bum1529/CDS/CDS                         | 8            | 3.5         | 10.37663711 | NA | NA | hypothetical protein |
| TS28Fae00290/CDS/CDS                    | 52.5         | 23          | 10.36253842 | NA | NA | hypothetical protein |
| TS29Fae00137/CDS/CDS                    | 41           | 18          | 10.34060712 | NA | NA | hypothetical protein |
| Ceut2209/CDS/CDS                        | 16.283333333 | 7.166666667 | 10.31479959 | NA | NA | hypothetical protein |
| TS29Fae04505/CDS/CDS                    | 32.91666667  | 14.5        | 10.30581954 | NA | NA | hypothetical protein |
| TS29Fae08626/CDS/CDS                    | 45.333333333 | 20          | 10.29016514 | NA | NA | hypothetical protein |
| TS29Fae09234/CDS/CDS                    | 21.5         | 9.5         | 10.27423609 | NA | NA | hypothetical protein |
| Msm0849/CDS/molvbdenum                  | 0.75         | 0.333333333 | 10.21450216 | NA | NA | hypothetical protein |
| BLD1766/CDS/putative                    | 0.75         | 0.333333333 | 10.21450216 | NA | NA | hypothetical protein |
| Msm0360/CDS/cell                        | 0.75         | 0.333333333 | 10.21450216 | NA | NA | hypothetical protein |
| BFych462859/CDS/hypothetical            | 3            | 1.333333333 | 10.21450216 | NA | NA | hypothetical protein |
| Bthe3733501/CDS/CDS                     | 3            | 1.333333333 | 10.21450216 | NA | NA | hypothetical protein |
| EUBREC3260/CDS/DHH                      | 9            | 4           | 10.21450216 | NA | NA | hypothetical protein |
| TS29Bac11412/CDS/CDS                    | 11.25        | 5           | 10.21450216 | NA | NA | hypothetical protein |
| TS28Fae06816/CDS/CDS                    | 9            | 4           | 10.21450216 | NA | NA | hypothetical protein |
| BFnctc0246/CDS/DNA                      | 2.25         | 1           | 10.21450216 | NA | NA | hypothetical protein |
| BDI1509/CDS/hypothetical                | 9            | 4           | 10.21450216 | NA | NA | hypothetical protein |
| BDI0585/CDS/putative                    | 9            | 4           | 10.21450216 | NA | NA | hypothetical protein |
| BDI0830/CDS/V-tvne                      | 9            | 4           | 10.21450216 | NA | NA | hypothetical protein |
| BDI2091/CDS/hypothetical                | 9            | 4           | 10.21450216 | NA | NA | hypothetical protein |
| BFych461007/CDS/seryl-tRNA              | 4.5          | 2           | 10.21450216 | NA | NA | hypothetical protein |
| Cbol1433/CDS/CDS                        | 4.5          | 2           | 10.21450216 | NA | NA | hypothetical protein |
| BactD23942/CDS/CDS                      | 4.5          | 2           | 10.21450216 | NA | NA | hypothetical protein |
| TS28Bac3060/CDS/CDS                     | 2.25         | 1           | 10.21450216 | NA | NA | hypothetical protein |
| BAD0326/CDS/SOS                         | 4.5          | 2           | 10.21450216 | NA | NA | hypothetical protein |
| TS29Fae08824/CDS/CDS                    | 4.5          | 2           | 10.21450216 | NA | NA | hypothetical protein |
| BFnctc2230/CDS/putative                 | 4.5          | 2           | 10.21450216 | NA | NA | hypothetical protein |
| BFych462174/CDS/ATP                     | 4.5          | 2           | 10.21450216 | NA | NA | hypothetical protein |
| BFych461399/CDS/putative                | 4.5          | 2           | 10.21450216 | NA | NA | hypothetical protein |
| BDI2769/CDS/GTP-binding                 | 9            | 4           | 10.21450216 | NA | NA | hypothetical protein |
| Aput0033/CDS/CDS                        | 9            | 4           | 10.21450216 | NA | NA | hypothetical protein |
| Aput0200/CDS/CDS                        | 9            | 4           | 10.21450216 | NA | NA | hypothetical protein |
| BDI1402/CDS/saspartyl-tRNA              | 9            | 4           | 10.21450216 | NA | NA | hypothetical protein |
| TS29Rum18953/CDS/CDS                    | 4.5          | 2           | 10.21450216 | NA | NA | hypothetical protein |
| TS28Rum09431/CDS/CDS                    | 4.5          | 2           | 10.21450216 | NA | NA | hypothetical protein |
| Bum0326/CDS/CDS                         | 6            | 2.666666667 | 10.21450216 | NA | NA | hypothetical protein |
| TS28Bac6137/CDS/CDS                     | 6            | 2.666666667 | 10.21450216 | NA | NA | hypothetical protein |
| TS29Rum00504/CDS/CDS                    | 177          | 79          | 10.17140299 | NA | NA | hypothetical protein |
| FpraM2121115/CDS/CDS                    | 6.333333333  | 2.833333333 | 10.1477407  | NA | NA | hypothetical protein |
| FpraM2120861/CDS/CDS                    | 11.16666667  | 5           | 10.13883918 | NA | NA | hypothetical protein |
| Csci2183/CDS/CDS                        | 6.7          | 3           | 10.13883918 | NA | NA | hypothetical protein |
| BVL13585/CDS/glyceroldehyde             | 1.113636364  | 0.5         | 10.11132537 | NA | NA | hypothetical protein |
| Caer1371/CDS/CDS                        | 16.333333333 | 7.333333333 | 10.11132537 | NA | NA | hypothetical protein |
| b3980/CDS/protein                       | 2.592857143  | 1.166666667 | 10.08942662 | NA | NA | hypothetical protein |
| Bum0387/CDS/CDS                         | 1.666666667  | 0.75        | 10.08839719 | NA | NA | hypothetical protein |
| b0042/CDS/predicted                     | 3.333333333  | 1.5         | 10.08839719 | NA | NA | hypothetical protein |
| Bxyl12956/CDS/CDS                       | 22.16666667  | 10          | 10.0631762  | NA | NA | hypothetical protein |
| TS29Bac02005/CDS/CDS                    | 8.833333333  | 4           | 10.02534471 | NA | NA | hypothetical protein |
| Msm1001/CDS/methyl                      | 4.416666667  | 2           | 10.02534471 | NA | NA | hypothetical protein |
| TS29Rum16049/CDS/CDS                    | 43           | 19.5        | 10.01079414 | NA | NA | hypothetical protein |
| BL0618/CDS/hypothetical                 | 0.2          | 9.083333333 | 0.099958431 | NA | NA | hypothetical protein |
| TS29Fae06689/CDS/CDS                    | 2            | 91          | 0.099775357 | NA | NA | hypothetical protein |

|                                                   |             |             |             |    |    |                      |
|---------------------------------------------------|-------------|-------------|-------------|----|----|----------------------|
| BLD0522 CDS Aspartate/tyrosine/aromatic           | 0.5         | 22.75       | 0.099775357 | NA | NA | hypothetical protein |
| BL0783 CDS Aspartate                              | 0.5         | 22.75       | 0.099775357 | NA | NA | hypothetical protein |
| BLD0960 CDS Transglutaminase-like                 | 0.333333333 | 15.16666667 | 0.099775357 | NA | NA | hypothetical protein |
| BL0942 CDS sodium/proton                          | 0.25        | 11.47619048 | 0.098895595 | NA | NA | hypothetical protein |
| TS29Bif0139 CDS CDS                               | 0.833333333 | 38.33333333 | 0.098690842 | NA | NA | hypothetical protein |
| TS29Fae09697 CDS CDS                              | 0.25        | 11.5        | 0.098690842 | NA | NA | hypothetical protein |
| TS29Fae09128 CDS CDS                              | 1           | 46          | 0.098690842 | NA | NA | hypothetical protein |
| TS28Bif1023 CDS CDS                               | 0.5         | 23          | 0.098690842 | NA | NA | hypothetical protein |
| BL1045 CDS hypothetical                           | 0.5         | 23          | 0.098690842 | NA | NA | hypothetical protein |
| BLD1209 CDS hypothetical                          | 0.5         | 23          | 0.098690842 | NA | NA | hypothetical protein |
| BLD0795 CDS Trk-tyrpe                             | 0.5         | 23          | 0.098690842 | NA | NA | hypothetical protein |
| TS29Fae07382 CDS CDS                              | 0.5         | 23          | 0.098690842 | NA | NA | hypothetical protein |
| BL1662 CDS hypothetical                           | 0.5         | 23          | 0.098690842 | NA | NA | hypothetical protein |
| TS28Rum14351 CDS CDS                              | 0.5         | 23          | 0.098690842 | NA | NA | hypothetical protein |
| TS29Dor2213 CDS CDS                               | 0.5         | 23          | 0.098690842 | NA | NA | hypothetical protein |
| Dlon1633 CDS CDS                                  | 0.5         | 23          | 0.098690842 | NA | NA | hypothetical protein |
| BL1746 CDS hypothetical                           | 0.5         | 23          | 0.098690842 | NA | NA | hypothetical protein |
| TS29RumUnc0014 CDS CDS                            | 2           | 92          | 0.098690842 | NA | NA | hypothetical protein |
| TS29Col0450 CDS CDS                               | 0.5         | 23          | 0.098690842 | NA | NA | hypothetical protein |
| BactD14022 CDS CDS                                | 0.333333333 | 15.33333333 | 0.098690842 | NA | NA | hypothetical protein |
| TS29Bac03731 CDS CDS                              | 0.333333333 | 15.33333333 | 0.098690842 | NA | NA | hypothetical protein |
| Caer0792 CDS CDS                                  | 2.142857143 | 99.11111111 | 0.098153448 | NA | NA | hypothetical protein |
| TS29Bif127 CDS CDS                                | 3           | 139         | 0.097980836 | NA | NA | hypothetical protein |
| Bthe3733887 CDS CDS                               | 0.1         | 4.638095238 | 0.09788024  | NA | NA | hypothetical protein |
| BL0445 CDS hypothetical                           | 0.833333333 | 38.66666667 | 0.097840059 | NA | NA | hypothetical protein |
| TS28CloUnc037 CDS CDS                             | 0.5         | 23.25       | 0.09762965  | NA | NA | hypothetical protein |
| TS29Fae04839 CDS CDS                              | 0.333333333 | 15.5        | 0.09762965  | NA | NA | hypothetical protein |
| BactD12179 CDS CDS                                | 0.333333333 | 15.5        | 0.09762965  | NA | NA | hypothetical protein |
| TS29Dor1689 CDS CDS                               | 0.428571429 | 20          | 0.097280973 | NA | NA | hypothetical protein |
| TS29RumUnc1357 CDS CDS                            | 0.2         | 9.333333333 | 0.097280973 | NA | NA | hypothetical protein |
| TS28Bif1170 CDS CDS                               | 0.75        | 35          | 0.097280973 | NA | NA | hypothetical protein |
| BLD1307 CDS Acyl-CoA                              | 0.75        | 35          | 0.097280973 | NA | NA | hypothetical protein |
| BL0513 CDS Acyl-CoA                               | 0.75        | 35          | 0.097280973 | NA | NA | hypothetical protein |
| Acol2744 CDS CDS                                  | 1           | 47          | 0.096591037 | NA | NA | hypothetical protein |
| TS28Fae22617 CDS CDS                              | 1           | 47          | 0.096591037 | NA | NA | hypothetical protein |
| TS29Fae09590 CDS CDS                              | 0.5         | 23.5        | 0.096591037 | NA | NA | hypothetical protein |
| Robe2597 CDS CDS                                  | 1           | 47          | 0.096591037 | NA | NA | hypothetical protein |
| TS28Rum01181 CDS CDS                              | 1           | 47          | 0.096591037 | NA | NA | hypothetical protein |
| TS28Fae08665 CDS CDS                              | 0.5         | 23.5        | 0.096591037 | NA | NA | hypothetical protein |
| TS28Bif0378 CDS CDS                               | 0.25        | 11.75       | 0.096591037 | NA | NA | hypothetical protein |
| BLD1633 CDS (acyl-carrier-protein)                | 1           | 47.13333333 | 0.096317795 | NA | NA | hypothetical protein |
| TS29Col0448 CDS CDS                               | 2           | 94.5        | 0.096079973 | NA | NA | hypothetical protein |
| TS29LacUnc129 CDS CDS                             | 0.805555556 | 38.11111111 | 0.095957422 | NA | NA | hypothetical protein |
| TS29Bif4077 CDS CDS                               | 5.5         | 260.5833333 | 0.095818803 | NA | NA | hypothetical protein |
| BLD0481 CDS Protoporphyrin                        | 0.2         | 9.5         | 0.095574289 | NA | NA | hypothetical protein |
| Bbre0311 CDS CDS                                  | 0.4         | 19          | 0.095574289 | NA | NA | hypothetical protein |
| TS29Fae07296 CDS CDS                              | 1           | 47.5        | 0.095574289 | NA | NA | hypothetical protein |
| BLD0801 CDS hypothetical                          | 0.5         | 23.75       | 0.095574289 | NA | NA | hypothetical protein |
| TS29Bac03838 CDS CDS                              | 0.333333333 | 15.86666667 | 0.095373503 | NA | NA | hypothetical protein |
| BLD1105 CDS Aspartate                             | 0.25        | 11.91666667 | 0.095240113 | NA | NA | hypothetical protein |
| BLD0788 CDS hypothetical                          | 0.6         | 28.7        | 0.094908266 | NA | NA | hypothetical protein |
| TS29Fae09519 CDS CDS                              | 0.5         | 24          | 0.094578724 | NA | NA | hypothetical protein |
| BLD0057 CDS Putative                              | 0.25        | 12          | 0.094578724 | NA | NA | hypothetical protein |
| TS29Rum17069 CDS CDS                              | 1           | 48          | 0.094578724 | NA | NA | hypothetical protein |
| TS29Fae06309 CDS CDS                              | 0.5         | 24          | 0.094578724 | NA | NA | hypothetical protein |
| Rumhyd3576 CDS CDS                                | 1.833333333 | 88          | 0.094578724 | NA | NA | hypothetical protein |
| TS29Fae00811 CDS CDS                              | 2.5         | 120         | 0.094578724 | NA | NA | hypothetical protein |
| Bbre0830 CDS CDS                                  | 0.25        | 12          | 0.094578724 | NA | NA | hypothetical protein |
| BL1029 CDS hypothetical                           | 0.75        | 36          | 0.094578724 | NA | NA | hypothetical protein |
| TS29Bac02619 CDS CDS                              | 0.333333333 | 16          | 0.094578724 | NA | NA | hypothetical protein |
| TS29Fae02094 CDS CDS                              | 0.333333333 | 16          | 0.094578724 | NA | NA | hypothetical protein |
| BL1347 CDS peptide                                | 0.75        | 36.33333333 | 0.093711029 | NA | NA | hypothetical protein |
| TS29Rum15689 CDS CDS                              | 2           | 97          | 0.093603685 | NA | NA | hypothetical protein |
| TS29Bif4036 CDS CDS                               | 1.333333333 | 64.91666667 | 0.093243209 | NA | NA | hypothetical protein |
| BLD0802 CDS Tyrosyl-tRNA                          | 0.75        | 36.58333333 | 0.093070635 | NA | NA | hypothetical protein |
| BLD1693 CDS Ribosomal                             | 0.5         | 24.41666667 | 0.092964752 | NA | NA | hypothetical protein |
| BLD1540 CDS ABC-type                              | 0.5         | 24.41666667 | 0.092964752 | NA | NA | hypothetical protein |
| TS29Clo4937 CDS CDS                               | 1           | 49          | 0.092648546 | NA | NA | hypothetical protein |
| TS29Bac10779 CDS CDS                              | 0.5         | 24.5        | 0.092648546 | NA | NA | hypothetical protein |
| TS29Bac04738 CDS CDS                              | 0.5         | 24.5        | 0.092648546 | NA | NA | hypothetical protein |
| TS28Fae17279 CDS CDS                              | 0.5         | 24.5        | 0.092648546 | NA | NA | hypothetical protein |
| TS29Fae08040 CDS CDS                              | 0.5         | 24.5        | 0.092648546 | NA | NA | hypothetical protein |
| TS29Fae0928 CDS CDS                               | 1           | 49          | 0.092648546 | NA | NA | hypothetical protein |
| TS29Fae03769 CDS CDS                              | 1           | 49          | 0.092648546 | NA | NA | hypothetical protein |
| TS29Bac05253 CDS CDS                              | 0.333333333 | 16.33333333 | 0.092648546 | NA | NA | hypothetical protein |
| BLD0933 CDS Glucosamine                           | 0.5         | 24.66666667 | 0.092022542 | NA | NA | hypothetical protein |
| TS29Bac10467 CDS CDS                              | 0.666666667 | 33          | 0.091712702 | NA | NA | hypothetical protein |
| TS29Fae04964 CDS CDS                              | 1           | 49.5        | 0.091712702 | NA | NA | hypothetical protein |
| TS29Fae05429 CDS CDS                              | 2           | 99          | 0.091712702 | NA | NA | hypothetical protein |
| TS29Fae04146 CDS CDS                              | 1.666666667 | 82.5        | 0.091712702 | NA | NA | hypothetical protein |
| Rumhyd3577 CDS CDS                                | 14          | 695         | 0.09144878  | NA | NA | hypothetical protein |
| BAD0021 CDS hypothetical                          | 0.5         | 24.83333333 | 0.091404941 | NA | NA | hypothetical protein |
| BLD0435 CDS L-2-hydroxyisocaproate/malate/lactate | 0.5         | 24.83333333 | 0.091404941 | NA | NA | hypothetical protein |
| TS29Fae06745 CDS CDS                              | 1.5         | 75          | 0.090795575 | NA | NA | hypothetical protein |
| TS29Rum20702 CDS CDS                              | 0.5         | 25          | 0.090795575 | NA | NA | hypothetical protein |
| TS29Rum11725 CDS CDS                              | 1           | 50          | 0.090795575 | NA | NA | hypothetical protein |
| TS28Fae14450 CDS CDS                              | 0.5         | 25          | 0.090795575 | NA | NA | hypothetical protein |
| TS29Rum20767 CDS CDS                              | 2           | 100         | 0.090795575 | NA | NA | hypothetical protein |
| TS29Fae05435 CDS CDS                              | 2           | 100         | 0.090795575 | NA | NA | hypothetical protein |
| TS28Fae02073 CDS CDS                              | 0.5         | 25          | 0.090795575 | NA | NA | hypothetical protein |
| FpraM2120695 CDS CDS                              | 0.25        | 12.5        | 0.090795575 | NA | NA | hypothetical protein |
| CspM6212553 CDS CDS                               | 0.2         | 10          | 0.090795575 | NA | NA | hypothetical protein |
| TS29Bac08381 CDS CDS                              | 0.666666667 | 33.5        | 0.090343855 | NA | NA | hypothetical protein |
| TS29Bac08284 CDS CDS                              | 1           | 50.33333333 | 0.09019428  | NA | NA | hypothetical protein |

|                              |             |             |             |    |    |                      |
|------------------------------|-------------|-------------|-------------|----|----|----------------------|
| TS29Bac10345/CDS/CDS         | 0.333333333 | 16.83333333 | 0.089896609 | NA | NA | hypothetical protein |
| BLD1931/CDS/Activator        | 0.75        | 38.16666667 | 0.089209626 | NA | NA | hypothetical protein |
| TS29Bac08512/CDS/CDS         | 0.5         | 25.5        | 0.089015269 | NA | NA | hypothetical protein |
| TS28Fae01204/CDS/CDS         | 0.5         | 25.5        | 0.089015269 | NA | NA | hypothetical protein |
| TS29Rum11417/CDS/CDS         | 2           | 102         | 0.089015269 | NA | NA | hypothetical protein |
| TS28Rum14113/CDS/CDS         | 0.5         | 25.5        | 0.089015269 | NA | NA | hypothetical protein |
| FpraM2120615/CDS/CDS         | 0.833333333 | 42.5        | 0.089015269 | NA | NA | hypothetical protein |
| TS29RumUnc1279/CDS/CDS       | 0.333333333 | 17          | 0.089015269 | NA | NA | hypothetical protein |
| Rbro0060/CDS/CDS             | 0.333333333 | 17          | 0.089015269 | NA | NA | hypothetical protein |
| TS28Clo10457/CDS/CDS         | 0.333333333 | 17          | 0.089015269 | NA | NA | hypothetical protein |
| TS29Bif1246/CDS/CDS          | 0.333333333 | 17          | 0.089015269 | NA | NA | hypothetical protein |
| TS29Fae01568/CDS/CDS         | 0.333333333 | 17          | 0.089015269 | NA | NA | hypothetical protein |
| BL0294/CDS/50S               | 0.142857143 | 7.333333333 | 0.088437248 | NA | NA | hypothetical protein |
| TS29Bif08611/CDS/CDS         | 0.142857143 | 7.333333333 | 0.088437248 | NA | NA | hypothetical protein |
| BLD1040/CDS/Ribosomal        | 0.142857143 | 7.333333333 | 0.088437248 | NA | NA | hypothetical protein |
| BLD1417/CDS/4-aminobutvrate  | 1.333333333 | 68.5        | 0.088365523 | NA | NA | hypothetical protein |
| TS29Fae00298/CDS/CDS         | 2           | 103         | 0.088151043 | NA | NA | hypothetical protein |
| TS29Fae08937/CDS/CDS         | 1           | 51.5        | 0.088151043 | NA | NA | hypothetical protein |
| TS28Bif4733/CDS/CDS          | 0.5         | 25.75       | 0.088151043 | NA | NA | hypothetical protein |
| FpraM2121349/CDS/CDS         | 0.333333333 | 17.16666667 | 0.088151043 | NA | NA | hypothetical protein |
| TS28Bif1874/CDS/CDS          | 0.2         | 10.33333333 | 0.087866685 | NA | NA | hypothetical protein |
| BL0982/CDS/glvcoegen         | 0.666666667 | 34.66666667 | 0.087303437 | NA | NA | hypothetical protein |
| TS29Fae03505/CDS/CDS         | 0.25        | 13          | 0.087303437 | NA | NA | hypothetical protein |
| TS29Fae08618/CDS/CDS         | 1.5         | 78          | 0.087303437 | NA | NA | hypothetical protein |
| Chol3893/CDS/CDS             | 1           | 52          | 0.087303437 | NA | NA | hypothetical protein |
| TS28Bif01511/CDS/CDS         | 0.25        | 13          | 0.087303437 | NA | NA | hypothetical protein |
| TS29Fae01454/CDS/CDS         | 1           | 52          | 0.087303437 | NA | NA | hypothetical protein |
| TS29Fae10349/CDS/CDS         | 1           | 52          | 0.087303437 | NA | NA | hypothetical protein |
| TS29Bac11777/CDS/CDS         | 0.333333333 | 17.33333333 | 0.087303437 | NA | NA | hypothetical protein |
| Dfor3099/CDS/CDS             | 3.25        | 169.65      | 0.086968941 | NA | NA | hypothetical protein |
| Svar1594/CDS/CDS             | 0.090909091 | 4.766666667 | 0.086581921 | NA | NA | hypothetical protein |
| BLD1780/CDS/Phosphate        | 0.5         | 26.25       | 0.086471976 | NA | NA | hypothetical protein |
| Beat0442/CDS/CDS             | 0.1         | 5.25        | 0.086471976 | NA | NA | hypothetical protein |
| TS29Bac12233/CDS/CDS         | 0.333333333 | 17.5        | 0.086471976 | NA | NA | hypothetical protein |
| FpraM2120671/CDS/CDS         | 0.333333333 | 17.5        | 0.086471976 | NA | NA | hypothetical protein |
| BLD0010/CDS/ATP-binding      | 1.125       | 59.08333333 | 0.086441485 | NA | NA | hypothetical protein |
| TS29Fae03170/CDS/CDS         | 2.5         | 131.5       | 0.086307581 | NA | NA | hypothetical protein |
| TS29Rum00537/CDS/CDS         | 1           | 53          | 0.085656203 | NA | NA | hypothetical protein |
| TS28Fae16679/CDS/CDS         | 1           | 53          | 0.085656203 | NA | NA | hypothetical protein |
| BLD0955/CDS/Superfamily      | 1.5         | 79.91666667 | 0.085209611 | NA | NA | hypothetical protein |
| TS29Bac08380/CDS/CDS         | 0.25        | 13.33333333 | 0.085120851 | NA | NA | hypothetical protein |
| BLD1306/CDS/3-oxoacyl-acyl   | 0.4         | 21.33333333 | 0.085120851 | NA | NA | hypothetical protein |
| BLD0589/CDS/NAD/NADP         | 0.25        | 13.33333333 | 0.085120851 | NA | NA | hypothetical protein |
| TS29Fae08344/CDS/CDS         | 2           | 107         | 0.084855677 | NA | NA | hypothetical protein |
| TS29Fae08245/CDS/CDS         | 1           | 53.5        | 0.084855677 | NA | NA | hypothetical protein |
| TS29Bif2313/CDS/CDS          | 0.666666667 | 35.83333333 | 0.084461    | NA | NA | hypothetical protein |
| TS29Rum11864/CDS/CDS         | 0.342857143 | 18.5        | 0.084134895 | NA | NA | hypothetical protein |
| BLD1881/CDS/hypothetical     | 1           | 54          | 0.084069977 | NA | NA | hypothetical protein |
| TS29Col1621/CDS/CDS          | 1           | 54          | 0.084069977 | NA | NA | hypothetical protein |
| TS29Rum11908/CDS/CDS         | 0.5         | 27          | 0.084069977 | NA | NA | hypothetical protein |
| BLD1443/CDS/Putative         | 0.5         | 27          | 0.084069977 | NA | NA | hypothetical protein |
| TS28Fae00367/CDS/CDS         | 1           | 54          | 0.084069977 | NA | NA | hypothetical protein |
| BLD1382/CDS/Serine/threonine | 0.25        | 13.5        | 0.084069977 | NA | NA | hypothetical protein |
| Acol2769/CDS/CDS             | 0.333333333 | 18          | 0.084069977 | NA | NA | hypothetical protein |
| TS28Rum14227/CDS/CDS         | 0.25        | 13.58333333 | 0.08355421  | NA | NA | hypothetical protein |
| BLD1338/CDS/Lael-type        | 0.25        | 13.58333333 | 0.08355421  | NA | NA | hypothetical protein |
| Bova0233/CDS/CDS             | 1.25        | 68          | 0.083451815 | NA | NA | hypothetical protein |
| Bova2230/CDS/CDS             | 1.25        | 68          | 0.083451815 | NA | NA | hypothetical protein |
| TS29Bac12110/CDS/CDS         | 0.25        | 13.66666667 | 0.083044733 | NA | NA | hypothetical protein |
| Chol3982/CDS/CDS             | 1.25        | 68.5        | 0.082842678 | NA | NA | hypothetical protein |
| TS28Bif4641/CDS/CDS          | 0.5         | 27.5        | 0.082541432 | NA | NA | hypothetical protein |
| TS29Fae08270/CDS/CDS         | 0.5         | 27.5        | 0.082541432 | NA | NA | hypothetical protein |
| TS29Rum20753/CDS/CDS         | 1           | 55          | 0.082541432 | NA | NA | hypothetical protein |
| TS29Bac04422/CDS/CDS         | 0.5         | 27.5        | 0.082541432 | NA | NA | hypothetical protein |
| BLD0875/CDS/ABC-type         | 0.25        | 13.75       | 0.082541432 | NA | NA | hypothetical protein |
| TS29Rum20483/CDS/CDS         | 1           | 55          | 0.082541432 | NA | NA | hypothetical protein |
| TS29Par961/CDS/CDS           | 3           | 165         | 0.082541432 | NA | NA | hypothetical protein |
| Bxyl2941/CDS/CDS             | 0.090909091 | 5           | 0.082541432 | NA | NA | hypothetical protein |
| M23Apeg881/CDS/Tranlation    | 0.090909091 | 5           | 0.082541432 | NA | NA | hypothetical protein |
| TS29Bac0834/CDS/CDS          | 0.333333333 | 18.33333333 | 0.082541432 | NA | NA | hypothetical protein |
| TS29Bif3555/CDS/CDS          | 6.25        | 344.25      | 0.082421546 | NA | NA | hypothetical protein |
| BactD10004/CDS/CDS           | 1.25        | 69          | 0.082242368 | NA | NA | hypothetical protein |
| BLD1536/CDS/Putative         | 0.5         | 27.66666667 | 0.082044194 | NA | NA | hypothetical protein |
| BL1124/CDS/fatty             | 0.666666667 | 37          | 0.081797815 | NA | NA | hypothetical protein |
| TS29Bif1960/CDS/CDS          | 0.333333333 | 18.5        | 0.081797815 | NA | NA | hypothetical protein |
| TS28CloUnc025/CDS/CDS        | 0.333333333 | 18.5        | 0.081797815 | NA | NA | hypothetical protein |
| TS29Bif3844/CDS/CDS          | 1.5         | 83.5        | 0.081552911 | NA | NA | hypothetical protein |
| TS28Fae12097/CDS/CDS         | 1.5         | 83.5        | 0.081552911 | NA | NA | hypothetical protein |
| Dfor1849/CDS/CDS             | 0.25        | 13.91666667 | 0.081552911 | NA | NA | hypothetical protein |
| BactD10025/CDS/CDS           | 2.388888889 | 133.0361111 | 0.081519423 | NA | NA | hypothetical protein |
| Bthe3735756/CDS/CDS          | 2.388888889 | 133.0361111 | 0.081519423 | NA | NA | hypothetical protein |
| TS29Col1603/CDS/CDS          | 2           | 111.5       | 0.081431009 | NA | NA | hypothetical protein |
| TS29Bac10930/CDS/CDS         | 0.666666667 | 37.33333333 | 0.081067477 | NA | NA | hypothetical protein |
| TS29Fae01272/CDS/CDS         | 1           | 56          | 0.081067477 | NA | NA | hypothetical protein |
| TS29Fae06820/CDS/CDS         | 0.25        | 14          | 0.081067477 | NA | NA | hypothetical protein |
| TS29Bac00506/CDS/CDS         | 0.2         | 11.2        | 0.081067477 | NA | NA | hypothetical protein |
| TS29Fae03179/CDS/CDS         | 0.5         | 28          | 0.081067477 | NA | NA | hypothetical protein |
| TS29Fae01278/CDS/CDS         | 1           | 56          | 0.081067477 | NA | NA | hypothetical protein |
| Rrior0322/CDS/CDS            | 0.25        | 14          | 0.081067477 | NA | NA | hypothetical protein |
| Bfra31120043/CDS/CDS         | 2.388888889 | 134.0361111 | 0.080911233 | NA | NA | hypothetical protein |
| BLD1087/CDS/RecG-like        | 0.916666667 | 51.5        | 0.080805123 | NA | NA | hypothetical protein |
| ELBREC3563/CDS/hypothetical  | 1.333333333 | 74.91666667 | 0.080796952 | NA | NA | hypothetical protein |
| TS29Bif0717/CDS/CDS          | 1           | 56.41666667 | 0.080468752 | NA | NA | hypothetical protein |
| TS29Fae08492/CDS/CDS         | 3           | 169.5       | 0.080350066 | NA | NA | hypothetical protein |
| BL0138/CDS/hypothetical      | 1           | 56.58333333 | 0.08023173  | NA | NA | hypothetical protein |
| Rlac0723/CDS/CDS             | 0.058823529 | 3.333333333 | 0.080113742 | NA | NA | hypothetical protein |



|                                                     |             |             |             |    |    |                      |
|-----------------------------------------------------|-------------|-------------|-------------|----|----|----------------------|
| Cspl.22445 CDS CDS                                  | 0.058823529 | 3.333333333 | 0.080113742 | NA | NA | hypothetical protein |
| TS29Bif2565 CDS CDS                                 | 1.25        | 70.91666667 | 0.080019602 | NA | NA | hypothetical protein |
| TS29Bac01538 CDS CDS                                | 1           | 57          | 0.079645241 | NA | NA | hypothetical protein |
| TS29Rum00194 CDS CDS                                | 1           | 57          | 0.079645241 | NA | NA | hypothetical protein |
| TS29Fae06280 CDS CDS                                | 0.5         | 28.5        | 0.079645241 | NA | NA | hypothetical protein |
| TS29Bac04296 CDS CDS                                | 0.333333333 | 19          | 0.079645241 | NA | NA | hypothetical protein |
| Cnex.1531 CDS CDS                                   | 0.071428571 | 4.083333333 | 0.079413039 | NA | NA | hypothetical protein |
| TS29Bif0556 CDS CDS                                 | 2           | 114.5       | 0.079297445 | NA | NA | hypothetical protein |
| TS29Rum17012 CDS CDS                                | 0.366666667 | 21          | 0.079265978 | NA | NA | hypothetical protein |
| BL1317 CDS pentidoglycan                            | 0.25        | 14.33333333 | 0.079182187 | NA | NA | hypothetical protein |
| BL1121 CDS amidophosphoribosyltransferase           | 0.5         | 28.66666667 | 0.079182187 | NA | NA | hypothetical protein |
| Dlon1659 CDS CDS                                    | 0.166666667 | 9.583333333 | 0.078952674 | NA | NA | hypothetical protein |
| BL1626 CDS class                                    | 0.833333333 | 48.16666667 | 0.078542885 | NA | NA | hypothetical protein |
| BL0329 CDS ATP-dependent                            | 0.916666667 | 53          | 0.078518186 | NA | NA | hypothetical protein |
| TS29Fae08919 CDS CDS                                | 0.5         | 29          | 0.078272047 | NA | NA | hypothetical protein |
| TS29Col0553 CDS CDS                                 | 0.5         | 29          | 0.078272047 | NA | NA | hypothetical protein |
| FpraM2121613 CDS CDS                                | 0.5         | 29          | 0.078272047 | NA | NA | hypothetical protein |
| ELUBREC3528 CDS cassette                            | 1           | 58          | 0.078272047 | NA | NA | hypothetical protein |
| BL1319 CDS UDP-N-acetylmuramoylalanyl-D-glutamyl-2, | 0.25        | 14.5        | 0.078272047 | NA | NA | hypothetical protein |
| TS28Fae14611 CDS CDS                                | 0.5         | 29          | 0.078272047 | NA | NA | hypothetical protein |
| FpraM2120220 CDS CDS                                | 0.5         | 29          | 0.078272047 | NA | NA | hypothetical protein |
| TS29Fae05201 CDS CDS                                | 0.5         | 29          | 0.078272047 | NA | NA | hypothetical protein |
| BLD1639 CDS hypothetical                            | 0.5         | 29          | 0.078272047 | NA | NA | hypothetical protein |
| TS29Bac00792 CDS CDS                                | 0.333333333 | 19.33333333 | 0.078272047 | NA | NA | hypothetical protein |
| TS28Clo00166 CDS CDS                                | 3           | 175         | 0.077824778 | NA | NA | hypothetical protein |
| TS29Bif3365 CDS CDS                                 | 0.333333333 | 19.5        | 0.077603055 | NA | NA | hypothetical protein |
| TS28Bif4782 CDS CDS                                 | 0.333333333 | 19.5        | 0.077603055 | NA | NA | hypothetical protein |
| TS29Bac1486 CDS CDS                                 | 0.4         | 23.5        | 0.07727283  | NA | NA | hypothetical protein |
| TS29Fae05612 CDS CDS                                | 2           | 117.5       | 0.07727283  | NA | NA | hypothetical protein |
| BLD1653 CDS Lantibiotic                             | 1.666666667 | 98.16666667 | 0.07707604  | NA | NA | hypothetical protein |
| Bfra1120044 CDS CDS                                 | 1.5         | 88.5        | 0.076945402 | NA | NA | hypothetical protein |
| TS29Fae07235 CDS CDS                                | 3           | 177         | 0.076945402 | NA | NA | hypothetical protein |
| TS29Bac03997 CDS CDS                                | 1           | 59          | 0.076945402 | NA | NA | hypothetical protein |
| TS29Rum19818 CDS CDS                                | 0.5         | 29.5        | 0.076945402 | NA | NA | hypothetical protein |
| TS29Rum16725 CDS CDS                                | 1           | 59          | 0.076945402 | NA | NA | hypothetical protein |
| BL0586 CDS protein                                  | 0.25        | 14.75       | 0.076945402 | NA | NA | hypothetical protein |
| BLD1752 CDS acetoin/pyruvate                        | 0.5         | 29.5        | 0.076945402 | NA | NA | hypothetical protein |
| TS28Fae19435 CDS CDS                                | 1           | 59          | 0.076945402 | NA | NA | hypothetical protein |
| TS29Bac02268 CDS CDS                                | 0.333333333 | 19.66666667 | 0.076945402 | NA | NA | hypothetical protein |
| BLD0978 CDS Membrane                                | 0.5         | 29.58333333 | 0.076728655 | NA | NA | hypothetical protein |
| TS29Fae04150 CDS CDS                                | 0.25        | 14.83333333 | 0.076513125 | NA | NA | hypothetical protein |
| TS29Fae00877 CDS CDS                                | 2           | 119         | 0.076298802 | NA | NA | hypothetical protein |
| TS29Fae08322 CDS CDS                                | 1           | 59.5        | 0.076298802 | NA | NA | hypothetical protein |
| TS29Fae05960 CDS CDS                                | 2           | 119         | 0.076298802 | NA | NA | hypothetical protein |
| Bbre0196 CDS CDS                                    | 1.6         | 95.3        | 0.076218741 | NA | NA | hypothetical protein |
| TS28Bac5945 CDS CDS                                 | 1           | 59.66666667 | 0.076085677 | NA | NA | hypothetical protein |
| TS29Fae00842 CDS CDS                                | 0.5         | 30          | 0.075662979 | NA | NA | hypothetical protein |
| BLD0460 CDS hypothetical                            | 0.4         | 12          | 0.075662979 | NA | NA | hypothetical protein |
| BL0288 CDS hypothetical                             | 0.25        | 15          | 0.075662979 | NA | NA | hypothetical protein |
| TS29Bac02801 CDS CDS                                | 0.4         | 24          | 0.075662979 | NA | NA | hypothetical protein |
| BLD0455 CDS Adenine/guanine                         | 0.25        | 15          | 0.075662979 | NA | NA | hypothetical protein |
| FpraM2121654 CDS CDS                                | 0.333333333 | 20          | 0.075662979 | NA | NA | hypothetical protein |
| FpraM2122510 CDS CDS                                | 0.333333333 | 20          | 0.075662979 | NA | NA | hypothetical protein |
| TS29Bac02308 CDS CDS                                | 0.333333333 | 20          | 0.075662979 | NA | NA | hypothetical protein |
| TS29Bif0699 CDS CDS                                 | 1.366666667 | 82.33333333 | 0.075356651 | NA | NA | hypothetical protein |
| ELUBREC3557 CDS hypothetical                        | 0.5         | 30.25       | 0.075037665 | NA | NA | hypothetical protein |
| BL1139 CDS hypothetical                             | 0.583333333 | 35.33333333 | 0.07499177  | NA | NA | hypothetical protein |
| TS29Bif1051 CDS CDS                                 | 0.583333333 | 35.33333333 | 0.07499177  | NA | NA | hypothetical protein |
| Bnsc1643 CDS CDS                                    | 0.583333333 | 35.33333333 | 0.07499177  | NA | NA | hypothetical protein |
| TS29Rum19434 CDS CDS                                | 0.25        | 15.25       | 0.074422602 | NA | NA | hypothetical protein |
| TS29Bac10133 CDS CDS                                | 0.5         | 30.5        | 0.074422602 | NA | NA | hypothetical protein |
| TS29Fae01383 CDS CDS                                | 1.666666667 | 102         | 0.074179391 | NA | NA | hypothetical protein |
| BLD1593 CDS Polyphosphate                           | 0.833333333 | 51.08333333 | 0.074058381 | NA | NA | hypothetical protein |
| TS29Bif3390 CDS CDS                                 | 0.5         | 30.66666667 | 0.074018132 | NA | NA | hypothetical protein |
| TS28Bif4812 CDS CDS                                 | 0.5         | 30.66666667 | 0.074018132 | NA | NA | hypothetical protein |
| TS29Bac04093 CDS CDS                                | 0.5         | 30.66666667 | 0.074018132 | NA | NA | hypothetical protein |
| BLD1261 CDS Glutamyl-tRNA                           | 0.5         | 30.75       | 0.07381754  | NA | NA | hypothetical protein |
| BL0469 CDS glutamyl-tRNA                            | 0.5         | 30.75       | 0.07381754  | NA | NA | hypothetical protein |
| TS29Clo4343 CDS CDS                                 | 0.333333333 | 20.5        | 0.07381754  | NA | NA | hypothetical protein |
| Ccom2073 CDS CDS                                    | 0.333333333 | 20.5        | 0.07381754  | NA | NA | hypothetical protein |
| TS29Rum19575 CDS CDS                                | 0.333333333 | 20.5        | 0.07381754  | NA | NA | hypothetical protein |
| TS29Fae06707 CDS CDS                                | 1.25        | 77          | 0.073697707 | NA | NA | hypothetical protein |
| TS28Bif1978 CDS CDS                                 | 0.25        | 15.41666667 | 0.073618034 | NA | NA | hypothetical protein |
| BL1068 CDS rRNA                                     | 0.75        | 46.33333333 | 0.073485627 | NA | NA | hypothetical protein |
| TS28Eub6361 CDS CDS                                 | 1.333333333 | 82.41666667 | 0.073444348 | NA | NA | hypothetical protein |
| TS29Rum21229 CDS CDS                                | 1.333333333 | 82.41666667 | 0.073444348 | NA | NA | hypothetical protein |
| Rea1418 CDS CDS                                     | 0.142857143 | 8.833333333 | 0.073419602 | NA | NA | hypothetical protein |
| BL1074 CDS dihydrodipolipoamide                     | 0.25        | 15.5        | 0.073222238 | NA | NA | hypothetical protein |
| TS29Fae09554 CDS CDS                                | 0.5         | 31          | 0.073222238 | NA | NA | hypothetical protein |
| TS29Fae07134 CDS CDS                                | 0.5         | 31          | 0.073222238 | NA | NA | hypothetical protein |
| TS29Bac08007 CDS CDS                                | 0.5         | 31          | 0.073222238 | NA | NA | hypothetical protein |
| TS29Fae02381 CDS CDS                                | 0.5         | 31          | 0.073222238 | NA | NA | hypothetical protein |
| Cnex2741 CDS CDS                                    | 1           | 62.5        | 0.07263646  | NA | NA | hypothetical protein |
| FpraM2120534 CDS CDS                                | 1           | 62.5        | 0.07263646  | NA | NA | hypothetical protein |
| TS29Bac08026 CDS CDS                                | 0.333333333 | 20.83333333 | 0.07263646  | NA | NA | hypothetical protein |
| TS28Bac5957 CDS CDS                                 | 0.333333333 | 20.83333333 | 0.07263646  | NA | NA | hypothetical protein |
| BLD0667 CDS Putative                                | 0.25        | 15.66666667 | 0.072443278 | NA | NA | hypothetical protein |
| BLD1559 CDS hypothetical                            | 0.5         | 31.41666667 | 0.07225112  | NA | NA | hypothetical protein |
| Acol0868 CDS CDS                                    | 0.5         | 31.5        | 0.07205998  | NA | NA | hypothetical protein |
| FpraM2121552 CDS CDS                                | 0.5         | 31.5        | 0.07205998  | NA | NA | hypothetical protein |
| TS29Clo4971 CDS CDS                                 | 0.4         | 25.2        | 0.07205998  | NA | NA | hypothetical protein |
| TS28Fae08468 CDS CDS                                | 1           | 63          | 0.07205998  | NA | NA | hypothetical protein |
| TS28Rum13642 CDS CDS                                | 0.5         | 31.5        | 0.07205998  | NA | NA | hypothetical protein |
| ELUBREC3540 CDS hypothetical                        | 1           | 63          | 0.07205998  | NA | NA | hypothetical protein |

|                                        |             |             |             |    |    |                      |
|----------------------------------------|-------------|-------------|-------------|----|----|----------------------|
| BLD1899/CDS/IMP                        | 0.5         | 31.5        | 0.07205998  | NA | NA | hypothetical protein |
| TS29Fae01532/CDS/CDS                   | 0.333333333 | 21          | 0.07205998  | NA | NA | hypothetical protein |
| BL1369/CDS/large                       | 0.75        | 47.33333333 | 0.071933114 | NA | NA | hypothetical protein |
| TS29Fae10167/CDS/CDS                   | 2.5         | 158.5       | 0.071605343 | NA | NA | hypothetical protein |
| TS29Bac09009/CDS/CDS                   | 0.333333333 | 21.16666667 | 0.071492579 | NA | NA | hypothetical protein |
| BLD0650/CDS/Xanthine/uracil            | 0.4         | 25.41666667 | 0.071445698 | NA | NA | hypothetical protein |
| BLD0670/CDS/Ribonucleotide-diphosphate | 0.5         | 31.83333333 | 0.071305425 | NA | NA | hypothetical protein |
| BLD1462/CDS/Ribonucleotide             | 0.5         | 31.83333333 | 0.071305425 | NA | NA | hypothetical protein |
| TS29Bif1961/CDS/CDS                    | 5.25        | 335.75      | 0.07098686  | NA | NA | hypothetical protein |
| TS29Fae01205/CDS/CDS                   | 0.5         | 32          | 0.070934043 | NA | NA | hypothetical protein |
| Robe0058/CDS/CDS                       | 0.5         | 32          | 0.070934043 | NA | NA | hypothetical protein |
| TS29Fae08605/CDS/CDS                   | 1           | 64          | 0.070934043 | NA | NA | hypothetical protein |
| TS29Col1803/CDS/CDS                    | 0.5         | 32          | 0.070934043 | NA | NA | hypothetical protein |
| TS29Rum15254/CDS/CDS                   | 0.5         | 32          | 0.070934043 | NA | NA | hypothetical protein |
| BLD0738/CDS/DNA                        | 0.75        | 48.33333333 | 0.070444842 | NA | NA | hypothetical protein |
| TS28Fae21994/CDS/CDS                   | 1           | 64.5        | 0.070384166 | NA | NA | hypothetical protein |
| TS29Fae08707/CDS/CDS                   | 2           | 129         | 0.070384166 | NA | NA | hypothetical protein |
| TS29Fae07415/CDS/CDS                   | 0.333333333 | 21.5        | 0.070384166 | NA | NA | hypothetical protein |
| TS29Fae01394/CDS/CDS                   | 0.583333333 | 37.83333333 | 0.069996588 | NA | NA | hypothetical protein |
| TS29Bif0741/CDS/CDS                    | 0.666666667 | 43.33333333 | 0.06984275  | NA | NA | hypothetical protein |
| TS28Bif0969/CDS/CDS                    | 0.666666667 | 43.33333333 | 0.06984275  | NA | NA | hypothetical protein |
| TS29Fae03136/CDS/CDS                   | 0.2         | 13          | 0.06984275  | NA | NA | hypothetical protein |
| TS29Fae09995/CDS/CDS                   | 1           | 65          | 0.06984275  | NA | NA | hypothetical protein |
| TS29Clo4940/CDS/CDS                    | 1           | 65          | 0.06984275  | NA | NA | hypothetical protein |
| TS29Bif0850/CDS/CDS                    | 0.25        | 16.33333333 | 0.069486409 | NA | NA | hypothetical protein |
| TS29Bac07411/CDS/CDS                   | 0.25        | 16.33333333 | 0.069486409 | NA | NA | hypothetical protein |
| Rbro0068/CDS/CDS                       | 1.25        | 81.66666667 | 0.069486409 | NA | NA | hypothetical protein |
| TS29Fae06060/CDS/CDS                   | 1           | 65.5        | 0.069309599 | NA | NA | hypothetical protein |
| TS29Dori484/CDS/CDS                    | 0.333333333 | 21.83333333 | 0.069309599 | NA | NA | hypothetical protein |
| TS29Fae01396/CDS/CDS                   | 0.333333333 | 21.83333333 | 0.069309599 | NA | NA | hypothetical protein |
| Hfif2884/CDS/CDS                       | 1.5         | 98.83333333 | 0.06890052  | NA | NA | hypothetical protein |
| BLD0891/CDS/S-layer                    | 0.666666667 | 44          | 0.068784526 | NA | NA | hypothetical protein |
| TS29Rum11717/CDS/CDS                   | 1           | 66          | 0.068784526 | NA | NA | hypothetical protein |
| TS29RumUnc0206/CDS/CDS                 | 1           | 66          | 0.068784526 | NA | NA | hypothetical protein |
| Hfif2897/CDS/CDS                       | 0.571428571 | 37.75       | 0.068719451 | NA | NA | hypothetical protein |
| Cnex1080/CDS/CDS                       | 0.166666667 | 11.01666667 | 0.068680465 | NA | NA | hypothetical protein |
| EUBREC2709/CDS/cassette                | 0.311361738 | 20.5952381  | 0.06863302  | NA | NA | hypothetical protein |
| EUBREC0786/CDS/cassette                | 0.311361738 | 20.5952381  | 0.06863302  | NA | NA | hypothetical protein |
| BL0327/CDS/tRNA                        | 0.25        | 16.625      | 0.068267349 | NA | NA | hypothetical protein |
| TS29Fae08726/CDS/CDS                   | 1           | 66.5        | 0.068267349 | NA | NA | hypothetical protein |
| BL0926/CDS/translation-associated      | 0.25        | 16.66666667 | 0.068096681 | NA | NA | hypothetical protein |
| BLD0125/CDS/LacI-type                  | 0.25        | 16.66666667 | 0.068096681 | NA | NA | hypothetical protein |
| TS29RumUnc0542/CDS/CDS                 | 1           | 67          | 0.067757892 | NA | NA | hypothetical protein |
| TS29Fae06317/CDS/CDS                   | 0.5         | 33.5        | 0.067757892 | NA | NA | hypothetical protein |
| TS29Rum19920/CDS/CDS                   | 2.5         | 167.5       | 0.067757892 | NA | NA | hypothetical protein |
| TS28Bif5344/CDS/CDS                    | 1           | 67          | 0.067757892 | NA | NA | hypothetical protein |
| TS29RumUnc0730/CDS/CDS                 | 1           | 67          | 0.067757892 | NA | NA | hypothetical protein |
| TS29Fae01375/CDS/CDS                   | 0.5         | 33.5        | 0.067757892 | NA | NA | hypothetical protein |
| TS29Fae06692/CDS/CDS                   | 1           | 67          | 0.067757892 | NA | NA | hypothetical protein |
| Rena1425/CDS/CDS                       | 0.333333333 | 22.33333333 | 0.067757892 | NA | NA | hypothetical protein |
| TS29Bac10245/CDS/CDS                   | 1           | 67.21666667 | 0.06753948  | NA | NA | hypothetical protein |
| Bhe3735772/CDS/CDS                     | 1           | 67.21666667 | 0.06753948  | NA | NA | hypothetical protein |
| TS28Bac5424/CDS/CDS                    | 1           | 67.21666667 | 0.06753948  | NA | NA | hypothetical protein |
| BWH25668/CDS/CDS                       | 1           | 67.21666667 | 0.06753948  | NA | NA | hypothetical protein |
| BLD0916/CDS/ABC-type                   | 0.5         | 33.66666667 | 0.067422456 | NA | NA | hypothetical protein |
| TS28Bif0994/CDS/CDS                    | 1           | 67.33333333 | 0.067422456 | NA | NA | hypothetical protein |
| TS29Fae00140/CDS/CDS                   | 2.5         | 169.5       | 0.066958388 | NA | NA | hypothetical protein |
| TS29Bif3433/CDS/CDS                    | 0.5         | 34          | 0.066761452 | NA | NA | hypothetical protein |
| Ehal0369/CDS/CDS                       | 1           | 68          | 0.066761452 | NA | NA | hypothetical protein |
| BLD0733/CDS/Hypothetical               | 0.25        | 17          | 0.066761452 | NA | NA | hypothetical protein |
| TS29Bac08000/CDS/CDS                   | 0.5         | 34          | 0.066761452 | NA | NA | hypothetical protein |
| TS28Bif4860/CDS/CDS                    | 0.5         | 34          | 0.066761452 | NA | NA | hypothetical protein |
| TS29Fae10019/CDS/CDS                   | 0.5         | 34          | 0.066761452 | NA | NA | hypothetical protein |
| TS29Fae09865/CDS/CDS                   | 0.5         | 34          | 0.066761452 | NA | NA | hypothetical protein |
| EUBREC3556/CDS/ABC-type                | 0.25        | 17          | 0.066761452 | NA | NA | hypothetical protein |
| TS28Fae07682/CDS/CDS                   | 0.25        | 17          | 0.066761452 | NA | NA | hypothetical protein |
| TS29Bac09097/CDS/CDS                   | 0.333333333 | 22.66666667 | 0.066761452 | NA | NA | hypothetical protein |
| TS29Rum11994/CDS/CDS                   | 0.25        | 17.08333333 | 0.066435786 | NA | NA | hypothetical protein |
| BL1034/CDS/gamma-glutamyl              | 1           | 68.5        | 0.066274142 | NA | NA | hypothetical protein |
| TS29Fae00218/CDS/CDS                   | 1           | 68.5        | 0.066274142 | NA | NA | hypothetical protein |
| TS29Rum17186/CDS/CDS                   | 1           | 68.5        | 0.066274142 | NA | NA | hypothetical protein |
| BL1286/CDS/aspartate                   | 0.25        | 17.16666667 | 0.066113283 | NA | NA | hypothetical protein |
| Acac2259/CDS/CDS                       | 0.666666667 | 46          | 0.065793895 | NA | NA | hypothetical protein |
| BL1003/CDS/hypothetical                | 1           | 69          | 0.065793895 | NA | NA | hypothetical protein |
| TS29Rum19532/CDS/CDS                   | 1           | 69          | 0.065793895 | NA | NA | hypothetical protein |
| Rtor0858/CDS/CDS                       | 0.5         | 34.5        | 0.065793895 | NA | NA | hypothetical protein |
| TS29RumUnc1092/CDS/CDS                 | 1           | 69          | 0.065793895 | NA | NA | hypothetical protein |
| TS29Fae03736/CDS/CDS                   | 1           | 69          | 0.065793895 | NA | NA | hypothetical protein |
| Bste1760/CDS/CDS                       | 0.333333333 | 23          | 0.065793895 | NA | NA | hypothetical protein |
| TS29Bac08047/CDS/CDS                   | 0.333333333 | 23          | 0.065793895 | NA | NA | hypothetical protein |
| TS29Rum01257/CDS/CDS                   | 0.333333333 | 23          | 0.065793895 | NA | NA | hypothetical protein |
| TS28Bac5948/CDS/CDS                    | 0.333333333 | 23          | 0.065793895 | NA | NA | hypothetical protein |
| TS29Fae03046/CDS/CDS                   | 0.5         | 34.83333333 | 0.065164288 | NA | NA | hypothetical protein |
| Bbre0193/CDS/CDS                       | 0.643589744 | 45          | 0.06492789  | NA | NA | hypothetical protein |
| TS28Fae01855/CDS/CDS                   | 0.5         | 35          | 0.064853982 | NA | NA | hypothetical protein |
| TS29Bif2775/CDS/CDS                    | 1           | 70          | 0.064853982 | NA | NA | hypothetical protein |
| BL1623/CDS/ribose-5-phosphate          | 0.333333333 | 23.41666667 | 0.064623185 | NA | NA | hypothetical protein |
| BLD0748/CDS/ABC-type                   | 0.25        | 17.58333333 | 0.064546617 | NA | NA | hypothetical protein |
| TS28Eub0311/CDS/CDS                    | 0.333333333 | 23.5        | 0.064394025 | NA | NA | hypothetical protein |
| BLD0878/CDS/Glutamine                  | 0.5         | 35.33333333 | 0.064242152 | NA | NA | hypothetical protein |
| TS29Fae02374/CDS/CDS                   | 0.333333333 | 23.66666667 | 0.063940546 | NA | NA | hypothetical protein |
| TS29Fae03345/CDS/CDS                   | 1           | 71          | 0.063940546 | NA | NA | hypothetical protein |
| BL1504/CDS/elongation                  | 0.25        | 17.75       | 0.063940546 | NA | NA | hypothetical protein |
| BLD0404/CDS/Translation                | 0.25        | 17.75       | 0.063940546 | NA | NA | hypothetical protein |
| BL0658/CDS/hypothetical                | 0.666666667 | 47.5        | 0.063716193 | NA | NA | hypothetical protein |

|                                           |             |             |             |    |    |                      |
|-------------------------------------------|-------------|-------------|-------------|----|----|----------------------|
| BL0017/CDS/histidyl-tRNA                  | 0.5         | 35.66666667 | 0.063641758 | NA | NA | hypothetical protein |
| TS29Bif310/CDS/CDS                        | 0.333333333 | 23.83333333 | 0.063493409 | NA | NA | hypothetical protein |
| FpraM2120898/CDS/CDS                      | 3.5         | 251.3333333 | 0.06321973  | NA | NA | hypothetical protein |
| EUBREC3581/CDS/hypothetical               | 0.333333333 | 24          | 0.063052482 | NA | NA | hypothetical protein |
| FpraM2120112/CDS/CDS                      | 0.166666667 | 12          | 0.063052482 | NA | NA | hypothetical protein |
| TS29Bae01930/CDS/CDS                      | 0.333333333 | 24          | 0.063052482 | NA | NA | hypothetical protein |
| TS29RumUnc0144/CDS/CDS                    | 1           | 72          | 0.063052482 | NA | NA | hypothetical protein |
| TS29Fae00065/CDS/CDS                      | 0.25        | 18          | 0.063052482 | NA | NA | hypothetical protein |
| TS29Fae07117/CDS/CDS                      | 0.5         | 36          | 0.063052482 | NA | NA | hypothetical protein |
| Bhan2439/CDS/CDS                          | 0.5         | 36          | 0.063052482 | NA | NA | hypothetical protein |
| TS28Fae21490/CDS/CDS                      | 0.25        | 18          | 0.063052482 | NA | NA | hypothetical protein |
| TS28Bac6168/CDS/CDS                       | 0.5         | 36          | 0.063052482 | NA | NA | hypothetical protein |
| Bconrop2863/CDS/CDS                       | 0.333333333 | 24          | 0.063052482 | NA | NA | hypothetical protein |
| BL0905/CDS/hypothetical                   | 0.6         | 43.25       | 0.062979589 | NA | NA | hypothetical protein |
| Rena2844/CDS/CDS                          | 0.142857143 | 10.33333333 | 0.062761918 | NA | NA | hypothetical protein |
| Rena1324/CDS/CDS                          | 0.142857143 | 10.33333333 | 0.062761918 | NA | NA | hypothetical protein |
| Bste1754/CDS/CDS                          | 1           | 72.33333333 | 0.062761918 | NA | NA | hypothetical protein |
| TS28Bif4916/CDS/CDS                       | 0.333333333 | 24.16666667 | 0.062617638 | NA | NA | hypothetical protein |
| BL1428/CDS/RNA                            | 0.666666667 | 48.41666667 | 0.062509862 | NA | NA | hypothetical protein |
| Acol2742/CDS/CDS                          | 0.5         | 36.33333333 | 0.062474019 | NA | NA | hypothetical protein |
| TS29Fae00935/CDS/CDS                      | 0.4         | 29.08333333 | 0.062438218 | NA | NA | hypothetical protein |
| TS29RumUnc1290/CDS/CDS                    | 1.25        | 91.16666667 | 0.062245595 | NA | NA | hypothetical protein |
| TS28Fae13657/CDS/CDS                      | 0.5         | 36.5        | 0.06218875  | NA | NA | hypothetical protein |
| TS29Fae01401/CDS/CDS                      | 1.866666667 | 136.3333333 | 0.06215834  | NA | NA | hypothetical protein |
| TS28Clo10839/CDS/CDS                      | 0.25        | 18.33333333 | 0.061906074 | NA | NA | hypothetical protein |
| TS29Rum20629/CDS/CDS                      | 1           | 73.5        | 0.061765697 | NA | NA | hypothetical protein |
| BLD0147/CDS/putative                      | 0.25        | 18.41666667 | 0.061625956 | NA | NA | hypothetical protein |
| TS29Fae05540/CDS/CDS                      | 1           | 74          | 0.061348361 | NA | NA | hypothetical protein |
| TS28Fae18152/CDS/CDS                      | 0.5         | 37          | 0.061348361 | NA | NA | hypothetical protein |
| BLD1037/CDS/Phosphopantetheine            | 0.25        | 18.5        | 0.061348361 | NA | NA | hypothetical protein |
| TS28Bif2180/CDS/CDS                       | 0.25        | 18.5        | 0.061348361 | NA | NA | hypothetical protein |
| BL0291/CDS/phosphopantetheine             | 0.25        | 18.5        | 0.061348361 | NA | NA | hypothetical protein |
| TS29Fae10363/CDS/CDS                      | 1           | 74.08333333 | 0.061279353 | NA | NA | hypothetical protein |
| TS29Bif2369/CDS/CDS                       | 1.5         | 111.3333333 | 0.061164684 | NA | NA | hypothetical protein |
| BL1016/CDS/Ek506-binding                  | 0.5         | 37.16666667 | 0.061073257 | NA | NA | hypothetical protein |
| BL0487/CDS/penicillin-binding             | 1           | 74.5        | 0.060936627 | NA | NA | hypothetical protein |
| BL1200/CDS/hypothetical                   | 0.75        | 56.08333333 | 0.060710265 | NA | NA | hypothetical protein |
| Rena2922/CDS/CDS                          | 0.142857143 | 10.7        | 0.060611198 | NA | NA | hypothetical protein |
| Rena1168/CDS/CDS                          | 0.142857143 | 10.7        | 0.060611198 | NA | NA | hypothetical protein |
| TS29Rum12392/CDS/CDS                      | 0.5         | 37.5        | 0.060530383 | NA | NA | hypothetical protein |
| Bcap1463/CDS/CDS                          | 0.2         | 15          | 0.060530383 | NA | NA | hypothetical protein |
| BLD0754/CDS/Signal                        | 0.25        | 18.75       | 0.060530383 | NA | NA | hypothetical protein |
| TS29Rum15297/CDS/CDS                      | 1           | 75          | 0.060530383 | NA | NA | hypothetical protein |
| EUBREC2687/CDS/TraG                       | 0.2         | 15          | 0.060530383 | NA | NA | hypothetical protein |
| EUBREC0808/CDS/TraG                       | 0.2         | 15          | 0.060530383 | NA | NA | hypothetical protein |
| BLD1051/CDS/Metal-dependent               | 0.25        | 18.83333333 | 0.06026255  | NA | NA | hypothetical protein |
| TS28Bif0642/CDS/CDS                       | 0.75        | 57          | 0.059733931 | NA | NA | hypothetical protein |
| TS29Bif3941/CDS/CDS                       | 0.75        | 57          | 0.059733931 | NA | NA | hypothetical protein |
| Dlon2151/CDS/CDS                          | 0.25        | 19          | 0.059733931 | NA | NA | hypothetical protein |
| TS29Fae03477/CDS/CDS                      | 1           | 76          | 0.059733931 | NA | NA | hypothetical protein |
| TS29Fae08157/CDS/CDS                      | 0.5         | 38          | 0.059733931 | NA | NA | hypothetical protein |
| TS29Rum20834/CDS/CDS                      | 0.5         | 38          | 0.059733931 | NA | NA | hypothetical protein |
| BL1679/CDS/hypothetical                   | 0.333333333 | 25.33333333 | 0.059733931 | NA | NA | hypothetical protein |
| TS28Bif1904/CDS/CDS                       | 0.5         | 38.16666667 | 0.059473084 | NA | NA | hypothetical protein |
| TS29Fae00818/CDS/CDS                      | 1.5         | 115         | 0.059214505 | NA | NA | hypothetical protein |
| TS29Col0158/CDS/CDS                       | 0.5         | 38.5        | 0.058958165 | NA | NA | hypothetical protein |
| TS29Fae00683/CDS/CDS                      | 1           | 77          | 0.058958165 | NA | NA | hypothetical protein |
| TS29Bac10023/CDS/CDS                      | 0.5         | 38.5        | 0.058958165 | NA | NA | hypothetical protein |
| TS29Fae02951/CDS/CDS                      | 0.5         | 38.5        | 0.058958165 | NA | NA | hypothetical protein |
| BLD0753/CDS/putative                      | 0.25        | 19.5        | 0.058202291 | NA | NA | hypothetical protein |
| TS29Bac03715/CDS/CDS                      | 0.5         | 39          | 0.058202291 | NA | NA | hypothetical protein |
| TS29LacUnc132/CDS/CDS                     | 0.25        | 19.5        | 0.058202291 | NA | NA | hypothetical protein |
| TS28Fae07424/CDS/CDS                      | 1           | 78          | 0.058202291 | NA | NA | hypothetical protein |
| BL1259/CDS/polyposphate                   | 0.833333333 | 65.08333333 | 0.058127769 | NA | NA | hypothetical protein |
| TS29Fae08113/CDS/CDS                      | 0.333333333 | 26.16666667 | 0.057831576 | NA | NA | hypothetical protein |
| TS29Bac00504/CDS/CDS                      | 0.2         | 15.75       | 0.057647984 | NA | NA | hypothetical protein |
| BLD1349/CDS/Zn-dependent                  | 0.25        | 19.75       | 0.057465554 | NA | NA | hypothetical protein |
| BL0564/CDS/modification                   | 0.25        | 19.75       | 0.057465554 | NA | NA | hypothetical protein |
| TS29Fae08221/CDS/CDS                      | 0.5         | 39.5        | 0.057465554 | NA | NA | hypothetical protein |
| BLD1359/CDS/site-specific                 | 0.25        | 19.75       | 0.057465554 | NA | NA | hypothetical protein |
| TS28Bac5958/CDS/CDS                       | 0.5         | 39.83333333 | 0.05698467  | NA | NA | hypothetical protein |
| TS29Bac09054/CDS/CDS                      | 0.2         | 16          | 0.056747234 | NA | NA | hypothetical protein |
| TS29Fae08956/CDS/CDS                      | 1           | 80          | 0.056747234 | NA | NA | hypothetical protein |
| TS29Rum20489/CDS/CDS                      | 1           | 80          | 0.056747234 | NA | NA | hypothetical protein |
| TS29Col1681/CDS/CDS                       | 0.5         | 40          | 0.056747234 | NA | NA | hypothetical protein |
| TS29Col02941/CDS/CDS                      | 1           | 80          | 0.056747234 | NA | NA | hypothetical protein |
| TS28Bif3723/CDS/CDS                       | 0.916666667 | 73.33333333 | 0.056747234 | NA | NA | hypothetical protein |
| TS29Rum21223/CDS/CDS                      | 0.5         | 40.25       | 0.056394767 | NA | NA | hypothetical protein |
| TS29Bac02161/CDS/CDS                      | 0.333333333 | 26.91666667 | 0.05622017  | NA | NA | hypothetical protein |
| TS29Fae01468/CDS/CDS                      | 0.5         | 40.5        | 0.056046651 | NA | NA | hypothetical protein |
| BL1412/CDS/CDP-diacylglycerol-3-phosphate | 0.25        | 20.25       | 0.056046651 | NA | NA | hypothetical protein |
| Rena2112/CDS/CDS                          | 0.5         | 40.5        | 0.056046651 | NA | NA | hypothetical protein |
| TS29Col1975/CDS/CDS                       | 1           | 81          | 0.056046651 | NA | NA | hypothetical protein |
| TS29Fae08172/CDS/CDS                      | 0.5         | 40.5        | 0.056046651 | NA | NA | hypothetical protein |
| TS29Rum19890/CDS/CDS                      | 0.5         | 40.5        | 0.056046651 | NA | NA | hypothetical protein |
| TS28LacUnc478/CDS/CDS                     | 0.333333333 | 27          | 0.056046651 | NA | NA | hypothetical protein |
| BLD1608/CDS/Homoserine                    | 0.25        | 20.5        | 0.055363155 | NA | NA | hypothetical protein |
| TS29Bif0458/CDS/CDS                       | 0.333333333 | 27.33333333 | 0.055363155 | NA | NA | hypothetical protein |
| BL0655/CDS/hypothetical                   | 0.333333333 | 27.33333333 | 0.055363155 | NA | NA | hypothetical protein |
| BLD1450/CDS/hypothetical                  | 0.333333333 | 27.33333333 | 0.055363155 | NA | NA | hypothetical protein |
| BL1274/CDS/homoserine                     | 0.375       | 30.91666667 | 0.055064702 | NA | NA | hypothetical protein |
| TS29Fae08271/CDS/CDS                      | 1           | 82.5        | 0.055027621 | NA | NA | hypothetical protein |
| RimL13977/CDS/CDS                         | 0.666666667 | 55.33333333 | 0.054696129 | NA | NA | hypothetical protein |
| TS29Fae06508/CDS/CDS                      | 0.5         | 41.5        | 0.054696129 | NA | NA | hypothetical protein |
| TS29Fae03209/CDS/CDS                      | 1           | 83          | 0.054696129 | NA | NA | hypothetical protein |

|                                                             |             |             |             |    |    |                      |
|-------------------------------------------------------------|-------------|-------------|-------------|----|----|----------------------|
| TS29Rum00494 CDS CDS                                        | 1           | 83          | 0.054696129 | NA | NA | hypothetical protein |
| BL0338 CDS Aspartate                                        | 0.583333333 | 48.41666667 | 0.054696129 | NA | NA | hypothetical protein |
| BL1675 CDS hypothetical                                     | 0.333333333 | 27.91666667 | 0.054206313 | NA | NA | hypothetical protein |
| TS29Fae04140 CDS CDS                                        | 0.25        | 21          | 0.054044985 | NA | NA | hypothetical protein |
| TS28Bif0747 CDS CDS                                         | 0.5         | 42          | 0.054044985 | NA | NA | hypothetical protein |
| EUBREC3538 CDS hypothetical                                 | 0.5         | 42          | 0.054044985 | NA | NA | hypothetical protein |
| TS29Eub2197 CDS CDS                                         | 0.5         | 42          | 0.054044985 | NA | NA | hypothetical protein |
| TS28Bif0925 CDS CDS                                         | 0.5         | 42.33333333 | 0.053619434 | NA | NA | hypothetical protein |
| BLD0830 CDS Hypothetical                                    | 0.25        | 21.16666667 | 0.053619434 | NA | NA | hypothetical protein |
| TS29Bif0857 CDS CDS                                         | 0.333333333 | 28.33333333 | 0.053409162 | NA | NA | hypothetical protein |
| BL1498 CDS hypothetical                                     | 0.25        | 21.25       | 0.053409162 | NA | NA | hypothetical protein |
| TS29Fae04618 CDS CDS                                        | 1           | 85          | 0.053409162 | NA | NA | hypothetical protein |
| Rtor1330 CDS CDS                                            | 1           | 85          | 0.053409162 | NA | NA | hypothetical protein |
| TS29Rum16956 CDS CDS                                        | 0.2         | 17          | 0.053409162 | NA | NA | hypothetical protein |
| EUBREC3533 CDS hypothetical                                 | 0.5         | 42.5        | 0.053409162 | NA | NA | hypothetical protein |
| BL0175 CDS AraC/XylS-type                                   | 0.5         | 42.66666667 | 0.053200532 | NA | NA | hypothetical protein |
| BL1434 CDS DNA                                              | 0.25        | 21.41666667 | 0.052993526 | NA | NA | hypothetical protein |
| BL0394 CDS ABC                                              | 0.25        | 21.41666667 | 0.052993526 | NA | NA | hypothetical protein |
| BLD1358 CDS DNA                                             | 0.25        | 21.5        | 0.052788125 | NA | NA | hypothetical protein |
| BL0563 CDS type                                             | 0.25        | 21.5        | 0.052788125 | NA | NA | hypothetical protein |
| TS28Fae00285 CDS CDS                                        | 0.5         | 43          | 0.052788125 | NA | NA | hypothetical protein |
| BL1246 CDS hypothetical                                     | 1           | 86.25       | 0.052635116 | NA | NA | hypothetical protein |
| TS28Bif4971 CDS CDS                                         | 0.8         | 69.31666667 | 0.052394657 | NA | NA | hypothetical protein |
| TS29Fae05591 CDS CDS                                        | 1           | 87          | 0.052181365 | NA | NA | hypothetical protein |
| TS29Bif315 CDS CDS                                          | 0.6         | 52.2        | 0.052181365 | NA | NA | hypothetical protein |
| TS29Bac10481 CDS CDS                                        | 0.333333333 | 29          | 0.052181365 | NA | NA | hypothetical protein |
| TS29Rum01103 CDS CDS                                        | 0.25        | 21.91666667 | 0.051784548 | NA | NA | hypothetical protein |
| BLD1858 CDS NagC-type                                       | 0.5         | 43.91666667 | 0.051686285 | NA | NA | hypothetical protein |
| TS29Rum00197 CDS CDS                                        | 1           | 88          | 0.051588395 | NA | NA | hypothetical protein |
| TS29Fae05346 CDS CDS                                        | 1           | 88          | 0.051588395 | NA | NA | hypothetical protein |
| BL0630 CDS glutamate                                        | 0.25        | 22          | 0.051588395 | NA | NA | hypothetical protein |
| TS29Bac00304 CDS CDS                                        | 0.5         | 44          | 0.051588395 | NA | NA | hypothetical protein |
| BL0682 CDS xylan                                            | 0.5         | 44.08333333 | 0.051490874 | NA | NA | hypothetical protein |
| BLD0016 CDS Hypothetical                                    | 0.333333333 | 29.41666667 | 0.051442252 | NA | NA | hypothetical protein |
| BL0428 CDS hypothetical                                     | 0.5         | 44.33333333 | 0.051200512 | NA | NA | hypothetical protein |
| BLD0158 CDS hypothetical                                    | 0.25        | 22.25       | 0.05100875  | NA | NA | hypothetical protein |
| TS28Fae11427 CDS CDS                                        | 1           | 89          | 0.05100875  | NA | NA | hypothetical protein |
| TS29Fae04718 CDS CDS                                        | 1           | 89          | 0.05100875  | NA | NA | hypothetical protein |
| TS29RumUnc0142 CDS CDS                                      | 1           | 89          | 0.05100875  | NA | NA | hypothetical protein |
| TS29Bif1452 CDS CDS                                         | 0.333333333 | 29.66666667 | 0.05100875  | NA | NA | hypothetical protein |
| BLD0456 CDS Succinyl-CoA                                    | 0.333333333 | 29.66666667 | 0.05100875  | NA | NA | hypothetical protein |
| TS29Bac11149 CDS CDS                                        | 0.333333333 | 29.66666667 | 0.05100875  | NA | NA | hypothetical protein |
| BL0099 CDS hypothetical                                     | 0.25        | 22.41666667 | 0.050629503 | NA | NA | hypothetical protein |
| TS29Bac08057 CDS CDS                                        | 1           | 89.66666667 | 0.050629503 | NA | NA | hypothetical protein |
| TS29Rum00211 CDS CDS                                        | 1           | 90          | 0.050441986 | NA | NA | hypothetical protein |
| FpraM2122462 CDS CDS                                        | 0.5         | 45          | 0.050441986 | NA | NA | hypothetical protein |
| Bxv12752 CDS CDS                                            | 0.25        | 22.5        | 0.050441986 | NA | NA | hypothetical protein |
| TS29Bif1709 CDS CDS                                         | 0.25        | 22.5        | 0.050441986 | NA | NA | hypothetical protein |
| TS28Bif1445 CDS CDS                                         | 0.5         | 45.5        | 0.049887678 | NA | NA | hypothetical protein |
| TS28Bif0760 CDS CDS                                         | 1.5         | 136.5       | 0.049887678 | NA | NA | hypothetical protein |
| TS29Bif3148 CDS CDS                                         | 0.5         | 45.5        | 0.049887678 | NA | NA | hypothetical protein |
| BL1032 CDS nicotinic                                        | 0.25        | 22.83333333 | 0.049705607 | NA | NA | hypothetical protein |
| BLD0782 CDS Nicotinic                                       | 0.25        | 22.83333333 | 0.049705607 | NA | NA | hypothetical protein |
| TS29Rum19365 CDS CDS                                        | 0.5         | 45.66666667 | 0.049705607 | NA | NA | hypothetical protein |
| TS29Rum16631 CDS CDS                                        | 1           | 91.5        | 0.049615068 | NA | NA | hypothetical protein |
| TS29Fae09145 CDS CDS                                        | 1           | 91.5        | 0.049615068 | NA | NA | hypothetical protein |
| TS28Bif5151 CDS CDS                                         | 0.25        | 22.95       | 0.049452927 | NA | NA | hypothetical protein |
| TS28Bif0173 CDS CDS                                         | 0.5         | 46          | 0.049345421 | NA | NA | hypothetical protein |
| TS29Bif2628 CDS CDS                                         | 0.5         | 46          | 0.049345421 | NA | NA | hypothetical protein |
| TS28Fae02049 CDS CDS                                        | 0.5         | 46          | 0.049345421 | NA | NA | hypothetical protein |
| TS29Fae00179 CDS CDS                                        | 0.5         | 46          | 0.049345421 | NA | NA | hypothetical protein |
| BLD0263 CDS Cation                                          | 0.333333333 | 30.91666667 | 0.048946401 | NA | NA | hypothetical protein |
| TS29Bif2629 CDS CDS                                         | 0.5         | 46.5        | 0.048814825 | NA | NA | hypothetical protein |
| TS28Bif0172 CDS CDS                                         | 0.5         | 46.5        | 0.048814825 | NA | NA | hypothetical protein |
| BLD1660 CDS Carbohydrate                                    | 0.5         | 46.75       | 0.048553783 | NA | NA | hypothetical protein |
| TS29Par966 CDS CDS                                          | 0.5         | 47          | 0.048295518 | NA | NA | hypothetical protein |
| BL1273 CDS diaminopimelate                                  | 0.75        | 70.5        | 0.048295518 | NA | NA | hypothetical protein |
| BLD0935 CDS ABC-type                                        | 0.333333333 | 31.33333333 | 0.048295518 | NA | NA | hypothetical protein |
| TS29Fae01270 CDS CDS                                        | 3           | 283         | 0.048124863 | NA | NA | hypothetical protein |
| EUBREC2716 CDS hypothetical                                 | 0.4         | 37.86666667 | 0.047955409 | NA | NA | hypothetical protein |
| EUBREC0779 CDS hypothetical                                 | 0.4         | 37.86666667 | 0.047955409 | NA | NA | hypothetical protein |
| TS29Fae08727 CDS CDS                                        | 0.833333333 | 79          | 0.047887961 | NA | NA | hypothetical protein |
| TS28Bif0548 CDS CDS                                         | 0.5         | 47.41666667 | 0.047871129 | NA | NA | hypothetical protein |
| TS29Bac02112 CDS CDS                                        | 0.333333333 | 31.66666667 | 0.047787145 | NA | NA | hypothetical protein |
| BLD1239 CDS Glycosyltransferase                             | 0.25        | 23.83333333 | 0.047620057 | NA | NA | hypothetical protein |
| BL0619 CDS hypothetical                                     | 0.4         | 38.2        | 0.04753695  | NA | NA | hypothetical protein |
| BLD1411 CDS Putative                                        | 0.4         | 38.2        | 0.04753695  | NA | NA | hypothetical protein |
| TS29Bif3418 CDS CDS                                         | 0.666666667 | 64          | 0.047289362 | NA | NA | hypothetical protein |
| TS29Rum11478 CDS CDS                                        | 0.5         | 48          | 0.047289362 | NA | NA | hypothetical protein |
| TS29Bac04880 CDS CDS                                        | 0.25        | 24          | 0.047289362 | NA | NA | hypothetical protein |
| TS29Bac08705 CDS CDS                                        | 0.333333333 | 32.25       | 0.046922778 | NA | NA | hypothetical protein |
| TS29Rum19891 CDS CDS                                        | 0.5         | 48.5        | 0.046801843 | NA | NA | hypothetical protein |
| BL0995 CDS ATP                                              | 0.25        | 24.25       | 0.046801843 | NA | NA | hypothetical protein |
| BL1102 CDS Na+                                              | 0.5         | 48.83333333 | 0.046482376 | NA | NA | hypothetical protein |
| BLD0131 CDS Hydroxymethylpyrimidine phosphomethylhvrimidine | 0.2         | 19.56666667 | 0.04640319  | NA | NA | hypothetical protein |
| Bnse1636 CDS CDS                                            | 0.25        | 24.5        | 0.046324273 | NA | NA | hypothetical protein |
| TS29Fae06734 CDS CDS                                        | 0.5         | 49          | 0.046324273 | NA | NA | hypothetical protein |
| TS29Fae05465 CDS CDS                                        | 1           | 98          | 0.046324273 | NA | NA | hypothetical protein |
| Rbro1710 CDS CDS                                            | 0.071428571 | 7           | 0.046324273 | NA | NA | hypothetical protein |
| TS29Rum15965 CDS CDS                                        | 2           | 196.5       | 0.046206399 | NA | NA | hypothetical protein |
| BLD0646 CDS Carbon                                          | 0.25        | 24.58333333 | 0.046167241 | NA | NA | hypothetical protein |
| BL0440 CDS glucose-6-phosphate                              | 0.75        | 74.16666667 | 0.045907875 | NA | NA | hypothetical protein |
| BLD1046 CDS ABC                                             | 0.5         | 49.45833333 | 0.045894983 | NA | NA | hypothetical protein |
| TS29Fae00444 CDS CDS                                        | 0.5         | 49.5        | 0.045856351 | NA | NA | hypothetical protein |
| TS28Clo02252 CDS CDS                                        | 0.5         | 49.5        | 0.045856351 | NA | NA | hypothetical protein |

|                                                                |             |             |             |    |    |                      |
|----------------------------------------------------------------|-------------|-------------|-------------|----|----|----------------------|
| TS29Fae08173 CDS CDS                                           | 1           | 99          | 0.045856351 | NA | NA | hypothetical protein |
| TS29Rum21253 CDS CDS                                           | 0.25        | 25          | 0.045397787 | NA | NA | hypothetical protein |
| TS29Bae04682 CDS CDS                                           | 0.333333333 | 33.33333333 | 0.045397787 | NA | NA | hypothetical protein |
| TS29Fae00159 CDS CDS                                           | 0.5         | 50          | 0.045397787 | NA | NA | hypothetical protein |
| BLD1777 CDS Lysyl-tRNA                                         | 0.25        | 25.08333333 | 0.045246964 | NA | NA | hypothetical protein |
| TS29Fae05598 CDS CDS                                           | 1           | 100.5       | 0.045171928 | NA | NA | hypothetical protein |
| TS28Bif2124 CDS CDS                                            | 0.5         | 50.41666667 | 0.045022599 | NA | NA | hypothetical protein |
| TS28Fae22362 CDS CDS                                           | 0.5         | 50.5        | 0.044948304 | NA | NA | hypothetical protein |
| BLD1196 CDS ABC-type                                           | 0.25        | 25.41666667 | 0.044653561 | NA | NA | hypothetical protein |
| BLD0942 CDS Protein                                            | 0.25        | 25.41666667 | 0.044653561 | NA | NA | hypothetical protein |
| TS29Fae06392 CDS CDS                                           | 0.5         | 51          | 0.044507635 | NA | NA | hypothetical protein |
| TS29Fae00727 CDS CDS                                           | 0.5         | 51          | 0.044507635 | NA | NA | hypothetical protein |
| TS29Fae06040 CDS CDS                                           | 0.5         | 51          | 0.044507635 | NA | NA | hypothetical protein |
| TS29Bae10515 CDS CDS                                           | 0.333333333 | 34          | 0.044507635 | NA | NA | hypothetical protein |
| EUBREC3552 CDS transcriptional                                 | 0.333333333 | 34          | 0.044507635 | NA | NA | hypothetical protein |
| EUBREC3564 CDS possible                                        | 3.75        | 384.3333333 | 0.044295326 | NA | NA | hypothetical protein |
| Even0940 CDS CDS                                               | 0.2         | 20.5        | 0.044290524 | NA | NA | hypothetical protein |
| TS29Bif1225 CDS CDS                                            | 0.5         | 51.33333333 | 0.044218624 | NA | NA | hypothetical protein |
| BL0798 CDS 5-methyltetrahydropteroyltryglutamate--homocysteine | 0.25        | 25.7        | 0.044161272 | NA | NA | hypothetical protein |
| BLD0538 CDS Cobalamin-independent                              | 0.25        | 25.7        | 0.044161272 | NA | NA | hypothetical protein |
| TS29Fae08699 CDS CDS                                           | 2           | 206         | 0.044075522 | NA | NA | hypothetical protein |
| BL1659 CDS hypothetical                                        | 0.333333333 | 34.33333333 | 0.044075522 | NA | NA | hypothetical protein |
| TS29Fae03387 CDS CDS                                           | 0.5         | 51.5        | 0.044075522 | NA | NA | hypothetical protein |
| BLD0787 CDS Cation                                             | 0.25        | 26          | 0.043651719 | NA | NA | hypothetical protein |
| TS29Bif3092 CDS CDS                                            | 0.25        | 26          | 0.043651719 | NA | NA | hypothetical protein |
| TS29Bae08083 CDS CDS                                           | 0.5         | 52          | 0.043651719 | NA | NA | hypothetical protein |
| Robe0032 CDS CDS                                               | 0.125       | 13          | 0.043651719 | NA | NA | hypothetical protein |
| TS28Bae5956 CDS CDS                                            | 0.333333333 | 34.66666667 | 0.043651719 | NA | NA | hypothetical protein |
| Bste1777 CDS CDS                                               | 0.333333333 | 34.66666667 | 0.043651719 | NA | NA | hypothetical protein |
| TS29Bae08028 CDS CDS                                           | 0.333333333 | 34.66666667 | 0.043651719 | NA | NA | hypothetical protein |
| TS29Rum19863 CDS CDS                                           | 0.388888889 | 40.5        | 0.04359184  | NA | NA | hypothetical protein |
| BL0512 CDS 3-oxoacyl-l-acyl-carrier                            | 0.4         | 41.66666667 | 0.043581876 | NA | NA | hypothetical protein |
| BL0299 CDS ATP                                                 | 0.5         | 52.125      | 0.043547038 | NA | NA | hypothetical protein |
| BL0987 CDS MurT                                                | 0.25        | 26.16666667 | 0.043373682 | NA | NA | hypothetical protein |
| BLD0873 CDS Cytosine                                           | 0.25        | 26.20833333 | 0.043304726 | NA | NA | hypothetical protein |
| TS29Fae05338 CDS CDS                                           | 0.5         | 52.5        | 0.043235988 | NA | NA | hypothetical protein |
| BLD0465 CDS Hypothetical                                       | 0.5         | 52.5        | 0.043235988 | NA | NA | hypothetical protein |
| BLD0397 CDS hypothetical                                       | 0.25        | 26.41666667 | 0.042963206 | NA | NA | hypothetical protein |
| TS29Eub2196 CDS CDS                                            | 0.25        | 26.5        | 0.042828101 | NA | NA | hypothetical protein |
| TS29Bae03249 CDS CDS                                           | 0.1         | 10.63809524 | 0.042674733 | NA | NA | hypothetical protein |
| TS29Bif0599 CDS CDS                                            | 0.75        | 80          | 0.042560426 | NA | NA | hypothetical protein |
| BLD1694 CDS Ribosomal                                          | 0.142857143 | 15.25       | 0.042527201 | NA | NA | hypothetical protein |
| BL1572 CDS 30S                                                 | 0.142857143 | 15.25       | 0.042527201 | NA | NA | hypothetical protein |
| TS29Fae00234 CDS CDS                                           | 0.5         | 53.5        | 0.042427839 | NA | NA | hypothetical protein |
| BL1118 CDS amino-acid                                          | 0.25        | 26.75       | 0.042427839 | NA | NA | hypothetical protein |
| BL1109 CDS carboxylesterase                                    | 0.25        | 26.83333333 | 0.042296075 | NA | NA | hypothetical protein |
| TS29Bif0870 CDS CDS                                            | 0.25        | 27          | 0.042034988 | NA | NA | hypothetical protein |
| TS28Bif0415 CDS CDS                                            | 0.25        | 27          | 0.042034988 | NA | NA | hypothetical protein |
| BLD1033 CDS hypothetical                                       | 0.25        | 27          | 0.042034988 | NA | NA | hypothetical protein |
| BL0199 CDS hypothetical                                        | 0.5         | 54.25       | 0.041841279 | NA | NA | hypothetical protein |
| BLD1447 CDS hypothetical                                       | 0.5         | 54.33333333 | 0.041777105 | NA | NA | hypothetical protein |
| TS29Rum15380 CDS CDS                                           | 1           | 109         | 0.041649346 | NA | NA | hypothetical protein |
| TS29Bif3143 CDS CDS                                            | 0.5         | 54.5        | 0.041649346 | NA | NA | hypothetical protein |
| BL1001 CDS histidine                                           | 0.25        | 27.25       | 0.041649346 | NA | NA | hypothetical protein |
| TS29Col0132 CDS CDS                                            | 1           | 110         | 0.041270716 | NA | NA | hypothetical protein |
| BLD0826 CDS acetoin/pyruvate                                   | 0.25        | 27.5        | 0.041270716 | NA | NA | hypothetical protein |
| BLD1962 CDS Type                                               | 1           | 110.4166667 | 0.041114977 | NA | NA | hypothetical protein |
| BL1322 CDS FtsW-like                                           | 0.25        | 27.75       | 0.040898908 | NA | NA | hypothetical protein |
| BLD0780 CDS Na+-driven                                         | 0.75        | 83.33333333 | 0.040858009 | NA | NA | hypothetical protein |
| TS28Bif4382 CDS CDS                                            | 0.25        | 28          | 0.040533739 | NA | NA | hypothetical protein |
| EUBREC3553 CDS serine-type                                     | 0.333333333 | 37.66666667 | 0.040175033 | NA | NA | hypothetical protein |
| BL1543 CDS Slendo-1,4-beta-xylanase                            | 0.5         | 56.75       | 0.039998051 | NA | NA | hypothetical protein |
| EUBREC3578 CDS site-specific                                   | 0.678571429 | 77.34285714 | 0.039829976 | NA | NA | hypothetical protein |
| TS29Rum19867 CDS CDS                                           | 0.271428571 | 31          | 0.039749215 | NA | NA | hypothetical protein |
| TS28Bif0736 CDS CDS                                            | 0.5         | 57.25       | 0.039648723 | NA | NA | hypothetical protein |
| EUBREC3542 CDS DNA-directed                                    | 0.5         | 57.33333333 | 0.039591094 | NA | NA | hypothetical protein |
| TS29Fae03388 CDS CDS                                           | 0.5         | 57.5        | 0.039476337 | NA | NA | hypothetical protein |
| BL1023 CDS aldo/keto                                           | 0.25        | 28.75       | 0.039476337 | NA | NA | hypothetical protein |
| BL1722 CDS inosine-5'-monophosphate                            | 0.5         | 57.5        | 0.039476337 | NA | NA | hypothetical protein |
| EUBREC3586 CDS hypothetical                                    | 0.5         | 57.5        | 0.039476337 | NA | NA | hypothetical protein |
| TS29Fae08953 CDS CDS                                           | 0.25        | 29          | 0.039136024 | NA | NA | hypothetical protein |
| TS28Fae11189 CDS CDS                                           | 0.25        | 29          | 0.039136024 | NA | NA | hypothetical protein |
| BL1654 CDS lysyl-tRNA                                          | 0.25        | 29.41666667 | 0.038581689 | NA | NA | hypothetical protein |
| TS28Fae19298 CDS CDS                                           | 0.25        | 29.5        | 0.038472701 | NA | NA | hypothetical protein |
| BLD0035 CDS truncated                                          | 0.2         | 23.75396825 | 0.038223329 | NA | NA | hypothetical protein |
| Ceut1808 CDS CDS                                               | 1           | 119         | 0.038149401 | NA | NA | hypothetical protein |
| TS29Eub0075 CDS CDS                                            | 0.166666667 | 20          | 0.037831489 | NA | NA | hypothetical protein |
| Bcap2331 CDS CDS                                               | 0.5         | 60          | 0.037831489 | NA | NA | hypothetical protein |
| BLD0253 CDS ABC-type                                           | 0.25        | 30          | 0.037831489 | NA | NA | hypothetical protein |
| TS29Rum15610 CDS CDS                                           | 0.2         | 24          | 0.037831489 | NA | NA | hypothetical protein |
| TS29Fae00852 CDS CDS                                           | 0.333333333 | 40          | 0.037831489 | NA | NA | hypothetical protein |
| TS29Bif2807 CDS CDS                                            | 0.5         | 60.16666667 | 0.037726693 | NA | NA | hypothetical protein |
| BLD1221 CDS Phosphoribosylpyrophosphate                        | 0.25        | 30.16666667 | 0.037622476 | NA | NA | hypothetical protein |
| TS29Fae09152 CDS CDS                                           | 0.666666667 | 81          | 0.037364434 | NA | NA | hypothetical protein |
| CspS21646 CDS CDS                                              | 0.058823529 | 7.166666667 | 0.037262206 | NA | NA | hypothetical protein |
| BLD0177 CDS UDP-N-acetylmuramyl                                | 0.25        | 30.5        | 0.037211301 | NA | NA | hypothetical protein |
| BLD0759 CDS hypothetical                                       | 0.25        | 30.75       | 0.03690877  | NA | NA | hypothetical protein |
| EUBREC3561 CDS hypothetical                                    | 0.333333333 | 41          | 0.03690877  | NA | NA | hypothetical protein |
| BLD1493 CDS MalfI-type                                         | 0.333333333 | 41          | 0.03690877  | NA | NA | hypothetical protein |
| TS29Rum14526 CDS CDS                                           | 1           | 123.5       | 0.036759342 | NA | NA | hypothetical protein |
| TS28Fae00197 CDS CDS                                           | 0.5         | 62          | 0.036611119 | NA | NA | hypothetical protein |
| TS29Fae03177 CDS CDS                                           | 0.5         | 62          | 0.036611119 | NA | NA | hypothetical protein |
| TS29Fae00317 CDS CDS                                           | 0.333333333 | 41.5        | 0.036464086 | NA | NA | hypothetical protein |

|                                    |             |             |             |    |    |                      |
|------------------------------------|-------------|-------------|-------------|----|----|----------------------|
| BL0269 CDS ABC                     | 0.4         | 50          | 0.03631823  | NA | NA | hypothetical protein |
| BLD1978 CDS Adenylosuccinate       | 0.333333333 | 41.83333333 | 0.036173536 | NA | NA | hypothetical protein |
| TS29Fae0681 CDS CDS                | 0.5         | 63          | 0.03602999  | NA | NA | hypothetical protein |
| TS29Bif0906 CDS CDS                | 0.25        | 31.75       | 0.035746289 | NA | NA | hypothetical protein |
| BL1203 CDS hypothetical            | 0.45        | 57.5        | 0.035528703 | NA | NA | hypothetical protein |
| HflI2148 CDS CDS                   | 0.25        | 32          | 0.035467021 | NA | NA | hypothetical protein |
| TS29Dor2244 CDS CDS                | 0.166666667 | 21.58333333 | 0.035056206 | NA | NA | hypothetical protein |
| Cnex3096 CDS CDS                   | 0.166666667 | 21.58333333 | 0.035056206 | NA | NA | hypothetical protein |
| TS29Fae05588 CDS CDS               | 0.5         | 65          | 0.034921375 | NA | NA | hypothetical protein |
| TS29Bif3530 CDS CDS                | 0.8         | 104.3166667 | 0.034815367 | NA | NA | hypothetical protein |
| TS29Fae03223 CDS CDS               | 0.5         | 65.5        | 0.0346548   | NA | NA | hypothetical protein |
| BLD0683 CDS Kef-type               | 0.25        | 32.80952381 | 0.034591928 | NA | NA | hypothetical protein |
| TS28Fae01850 CDS CDS               | 0.5         | 66          | 0.034392263 | NA | NA | hypothetical protein |
| TS29Bac03035 CDS CDS               | 0.090909091 | 12          | 0.034392263 | NA | NA | hypothetical protein |
| BL0519 CDS GrpE                    | 0.25        | 33.08333333 | 0.034305633 | NA | NA | hypothetical protein |
| BL1009 CDS hypothetical            | 0.25        | 33.16666667 | 0.034219438 | NA | NA | hypothetical protein |
| BL0651 CDS hypothetical            | 0.25        | 33.33333333 | 0.034048341 | NA | NA | hypothetical protein |
| BL0964 CDS UDP-N-acetylglucosamine | 0.25        | 33.58333333 | 0.033794879 | NA | NA | hypothetical protein |
| BL0113 CDS phosphomethylpyrimidine | 0.2         | 26.9        | 0.033753002 | NA | NA | hypothetical protein |
| TS29Fae01196 CDS CDS               | 1           | 137         | 0.033137071 | NA | NA | hypothetical protein |
| TS29Bif0503 CDS CDS                | 1           | 137.5       | 0.033016573 | NA | NA | hypothetical protein |
| TS29Dor2238 CDS CDS                | 0.2         | 27.83333333 | 0.032621165 | NA | NA | hypothetical protein |
| Acol2763 CDS CDS                   | 0.071428571 | 10          | 0.032426991 | NA | NA | hypothetical protein |
| TS29Fae08942 CDS CDS               | 0.5         | 71          | 0.031970273 | NA | NA | hypothetical protein |
| Rbro1699 CDS CDS                   | 0.333333333 | 47.5        | 0.031858096 | NA | NA | hypothetical protein |
| TS29Bif0843 CDS CDS                | 1           | 142.8333333 | 0.031783748 | NA | NA | hypothetical protein |
| TS29Fae05216 CDS CDS               | 0.5         | 72          | 0.031526241 | NA | NA | hypothetical protein |
| TS28Bif4624 CDS CDS                | 0.25        | 36          | 0.031526241 | NA | NA | hypothetical protein |
| TS29Fae06041 CDS CDS               | 0.5         | 72          | 0.031526241 | NA | NA | hypothetical protein |
| FpraM2120366 CDS CDS               | 0.333333333 | 48          | 0.031526241 | NA | NA | hypothetical protein |
| RintL10348 CDS CDS                 | 0.058823529 | 8.5         | 0.031417154 | NA | NA | hypothetical protein |
| BL0543 CDS LacI-type               | 0.25        | 36.25       | 0.031308819 | NA | NA | hypothetical protein |
| TS28Bif0171 CDS CDS                | 0.5         | 72.5        | 0.031308819 | NA | NA | hypothetical protein |
| TS29Bif2630 CDS CDS                | 0.5         | 72.5        | 0.031308819 | NA | NA | hypothetical protein |
| BL0652 CDS hypothetical            | 0.5         | 73          | 0.031094375 | NA | NA | hypothetical protein |
| BL1215 CDS penicillin-binding      | 0.5         | 73.25       | 0.030988251 | NA | NA | hypothetical protein |
| TS28Bif0921 CDS CDS                | 0.333333333 | 48.83333333 | 0.030988251 | NA | NA | hypothetical protein |
| TS29Col0428 CDS CDS                | 1           | 147.5       | 0.030778161 | NA | NA | hypothetical protein |
| BL1293 CDS xylose                  | 0.25        | 37.33333333 | 0.030400304 | NA | NA | hypothetical protein |
| TS28Bif4619 CDS CDS                | 0.25        | 37.41666667 | 0.030332597 | NA | NA | hypothetical protein |
| TS29Bif3217 CDS CDS                | 0.25        | 37.41666667 | 0.030332597 | NA | NA | hypothetical protein |
| BL1006 CDS hypothetical            | 0.25        | 37.41666667 | 0.030332597 | NA | NA | hypothetical protein |
| TS28Bif4620 CDS CDS                | 0.25        | 37.5        | 0.030265192 | NA | NA | hypothetical protein |
| BL0953 CDS glutamine-dependent     | 0.25        | 37.75       | 0.03006476  | NA | NA | hypothetical protein |
| BL1301 CDS hypothetical            | 0.25        | 38.75       | 0.029288895 | NA | NA | hypothetical protein |
| BL1179 CDS ABC                     | 0.25        | 40          | 0.028373617 | NA | NA | hypothetical protein |
| TS29Fae00493 CDS CDS               | 0.5         | 80          | 0.028373617 | NA | NA | hypothetical protein |
| Clep1852 CDS CDS                   | 0.590909091 | 96.5        | 0.027798928 | NA | NA | hypothetical protein |
| BL0906 CDS carbon                  | 0.25        | 40.91666667 | 0.027737956 | NA | NA | hypothetical protein |
| CspM6211849 CDS CDS                | 0.215909091 | 35.74801587 | 0.02741913  | NA | NA | hypothetical protein |
| Rbro1723 CDS CDS                   | 0.215909091 | 35.74801587 | 0.02741913  | NA | NA | hypothetical protein |
| Acol2781 CDS CDS                   | 0.215909091 | 35.74801587 | 0.02741913  | NA | NA | hypothetical protein |
| Dfor2033 CDS CDS                   | 0.215909091 | 35.74801587 | 0.02741913  | NA | NA | hypothetical protein |
| Acae2252 CDS CDS                   | 0.215909091 | 35.74801587 | 0.02741913  | NA | NA | hypothetical protein |
| Cnex2286 CDS CDS                   | 0.215909091 | 35.74801587 | 0.02741913  | NA | NA | hypothetical protein |
| TS29Fae01446 CDS CDS               | 0.333333333 | 55.5        | 0.027265938 | NA | NA | hypothetical protein |
| Even0583 CDS CDS                   | 0.6         | 100.5833333 | 0.027080702 | NA | NA | hypothetical protein |
| TS28Clo00184 CDS CDS               | 0.215909091 | 36.24801587 | 0.027040915 | NA | NA | hypothetical protein |
| TS29Fae06294 CDS CDS               | 0.5         | 85          | 0.026704581 | NA | NA | hypothetical protein |
| TS29Bif4076 CDS CDS                | 1           | 170.8333333 | 0.026574315 | NA | NA | hypothetical protein |
| BL0598 CDS hypothetical            | 0.25        | 42.75       | 0.026548414 | NA | NA | hypothetical protein |
| Robe2653 CDS CDS                   | 0.090909091 | 15.58333333 | 0.026483882 | NA | NA | hypothetical protein |
| TS29Bac08382 CDS CDS               | 0.25        | 43          | 0.026394062 | NA | NA | hypothetical protein |
| Cnex2742 CDS CDS                   | 0.4         | 70.25       | 0.025849274 | NA | NA | hypothetical protein |
| TS28Bif4393 CDS CDS                | 0.5         | 87.83333333 | 0.025843143 | NA | NA | hypothetical protein |
| TS29Bif0461 CDS CDS                | 0.5         | 87.83333333 | 0.025843143 | NA | NA | hypothetical protein |
| TS29Fae05506 CDS CDS               | 1           | 176         | 0.025794197 | NA | NA | hypothetical protein |
| BL1116 CDS chlorohydrolase-like    | 0.25        | 44.20833333 | 0.025672641 | NA | NA | hypothetical protein |
| BL1452 CDS putative                | 0.333333333 | 59.25       | 0.025540246 | NA | NA | hypothetical protein |
| TS29Bif2813 CDS CDS                | 0.5         | 89.5        | 0.025361892 | NA | NA | hypothetical protein |
| BLD0303 CDS DNA                    | 0.25        | 45.25       | 0.02508165  | NA | NA | hypothetical protein |
| TS29Rum17139 CDS CDS               | 0.5         | 90.5        | 0.02508165  | NA | NA | hypothetical protein |
| TS29Fae0552 CDS CDS                | 0.5         | 90.5        | 0.02508165  | NA | NA | hypothetical protein |
| EUBREC0803 CDS hypothetical        | 0.267857143 | 49          | 0.024816575 | NA | NA | hypothetical protein |
| EUBREC2692 CDS hypothetical        | 0.267857143 | 49          | 0.024816575 | NA | NA | hypothetical protein |
| TS29Rum16533 CDS CDS               | 0.333333333 | 61          | 0.024807534 | NA | NA | hypothetical protein |
| BL0400a CDS hypothetical           | 0.2         | 36.75       | 0.024706279 | NA | NA | hypothetical protein |
| TS29Fae01195 CDS CDS               | 0.5         | 92          | 0.024672711 | NA | NA | hypothetical protein |
| TS29Bif3606 CDS CDS                | 0.5         | 93.25       | 0.024341977 | NA | NA | hypothetical protein |
| BLD0728 CDS Na+/xyloside           | 0.25        | 47.08333333 | 0.02410502  | NA | NA | hypothetical protein |
| TS28Bif5373 CDS CDS                | 0.25        | 47.75       | 0.023768475 | NA | NA | hypothetical protein |
| TS29Bif2384 CDS CDS                | 0.333333333 | 63.83333333 | 0.023706416 | NA | NA | hypothetical protein |
| TS28Bif5122 CDS CDS                | 0.333333333 | 63.91666667 | 0.023675508 | NA | NA | hypothetical protein |
| TS29Bif3999 CDS CDS                | 0.333333333 | 63.91666667 | 0.023675508 | NA | NA | hypothetical protein |
| BLD1380 CDS Bacterial              | 0.25        | 48.41666667 | 0.023441198 | NA | NA | hypothetical protein |
| TS29Bac10729 CDS CDS               | 0.2         | 39          | 0.023280917 | NA | NA | hypothetical protein |
| BL0634 CDS DNA                     | 0.30952381  | 61.58333333 | 0.022817368 | NA | NA | hypothetical protein |
| TS29Bac10503 CDS CDS               | 0.4         | 81          | 0.02241866  | NA | NA | hypothetical protein |
| TS29Fae10181 CDS CDS               | 0.5         | 101.5       | 0.022363442 | NA | NA | hypothetical protein |
| RintL10504 CDS CDS                 | 0.058823529 | 12          | 0.022253817 | NA | NA | hypothetical protein |
| BL0143 CDS ABC                     | 0.25        | 51.25       | 0.022145262 | NA | NA | hypothetical protein |
| TS29Fae08536 CDS CDS               | 0.5         | 103.5       | 0.021931298 | NA | NA | hypothetical protein |
| TS29RumUnc0603 CDS CDS             | 1           | 210         | 0.021617994 | NA | NA | hypothetical protein |
| TS29Bif0960 CDS CDS                | 0.333333333 | 70.83333333 | 0.021363665 | NA | NA | hypothetical protein |
| BLD0815 CDS N-acetylglutamate      | 0.25        | 53.5        | 0.021213919 | NA | NA | hypothetical protein |

|                                      |             |              |             |    |    |                      |
|--------------------------------------|-------------|--------------|-------------|----|----|----------------------|
| Edol0301 CDS CDS                     | 0.2         | 43.08333333  | 0.021074408 | NA | NA | hypothetical protein |
| BL0163 CDS ABC                       | 0.25        | 54.08333333  | 0.02098511  | NA | NA | hypothetical protein |
| TS29Fae03171 CDS CDS                 | 0.5         | 108.5        | 0.020920639 | NA | NA | hypothetical protein |
| Dfor3073 CDS CDS                     | 0.2         | 44.08333333  | 0.02059635  | NA | NA | hypothetical protein |
| TS29Par963 CDS CDS                   | 1           | 220.5        | 0.020588566 | NA | NA | hypothetical protein |
| TS28Dor3153 CDS CDS                  | 0.2         | 44.58333333  | 0.020365363 | NA | NA | hypothetical protein |
| BLD0760 CDS Putative                 | 0.25        | 55.83333333  | 0.020327367 | NA | NA | hypothetical protein |
| TS29Fae03346 CDS CDS                 | 0.5         | 112          | 0.020266869 | NA | NA | hypothetical protein |
| TS29Bif0441 CDS CDS                  | 0.5         | 113.9166667  | 0.019925876 | NA | NA | hypothetical protein |
| BL0976 CDS galactoside               | 0.25        | 57.08333333  | 0.019882243 | NA | NA | hypothetical protein |
| BL1669 CDS hypothetical              | 0.25        | 57.55952381  | 0.019717757 | NA | NA | hypothetical protein |
| Even0581 CDS CDS                     | 1           | 231.08333333 | 0.019645635 | NA | NA | hypothetical protein |
| BLD1431 CDS Type                     | 0.30952381  | 72.08333333  | 0.019493682 | NA | NA | hypothetical protein |
| Ccom1197 CDS CDS                     | 0.058823529 | 14           | 0.019074701 | NA | NA | hypothetical protein |
| TS29Fae10352 CDS CDS                 | 0.25        | 61           | 0.018605651 | NA | NA | hypothetical protein |
| TS29Fae10062 CDS CDS                 | 0.333333333 | 81.5         | 0.018567602 | NA | NA | hypothetical protein |
| BLD0219 CDS Chromosome               | 0.25        | 61.16666667  | 0.018554954 | NA | NA | hypothetical protein |
| TS29Bif0550 CDS CDS                  | 0.25        | 62.5         | 0.018159115 | NA | NA | hypothetical protein |
| TS28Bif5319 CDS CDS                  | 0.25        | 62.5         | 0.018159115 | NA | NA | hypothetical protein |
| TS29Fae00843 CDS CDS                 | 0.5         | 126.5        | 0.017943789 | NA | NA | hypothetical protein |
| BLD1383 CDS Serine/threonine         | 0.333333333 | 84.33333333  | 0.017943789 | NA | NA | hypothetical protein |
| BL1275 CDS homoserine                | 0.25        | 63.5         | 0.017873145 | NA | NA | hypothetical protein |
| TS29Fae06362 CDS CDS                 | 0.5         | 127          | 0.017873145 | NA | NA | hypothetical protein |
| TS29Bif3585 CDS CDS                  | 0.5         | 129.9166667  | 0.017471887 | NA | NA | hypothetical protein |
| BL1007 CDS hypothetical              | 0.25        | 65.66666667  | 0.017283422 | NA | NA | hypothetical protein |
| TS29Bif0578 CDS CDS                  | 0.5         | 131.6666667  | 0.017239666 | NA | NA | hypothetical protein |
| TS29Bif0927 CDS CDS                  | 0.25        | 66.5         | 0.017066837 | NA | NA | hypothetical protein |
| TS29Bif2378 CDS CDS                  | 0.75        | 205.5        | 0.016568536 | NA | NA | hypothetical protein |
| BLD1427 CDS Glutamate                | 0.25        | 69.33333333  | 0.016369394 | NA | NA | hypothetical protein |
| BL0157 CDS hypothetical              | 0.25        | 69.41666667  | 0.016349743 | NA | NA | hypothetical protein |
| TS28Bif2174 CDS CDS                  | 0.25        | 70.08333333  | 0.016194217 | NA | NA | hypothetical protein |
| TS29Bif3481 CDS CDS                  | 0.333333333 | 95.16666667  | 0.015901151 | NA | NA | hypothetical protein |
| Dfor3101 CDS CDS                     | 0.5         | 143.33333333 | 0.015836437 | NA | NA | hypothetical protein |
| TS28Bif1972 CDS CDS                  | 0.333333333 | 95.66666667  | 0.015818044 | NA | NA | hypothetical protein |
| BLD0762 CDS Transcriptional          | 0.25        | 72.66666667  | 0.015618505 | NA | NA | hypothetical protein |
| TS29Bif2503 CDS CDS                  | 0.25        | 74           | 0.01533709  | NA | NA | hypothetical protein |
| BL1544 CDS extracellular             | 0.25        | 76.16666667  | 0.014900805 | NA | NA | hypothetical protein |
| TS29Bif2691 CDS CDS                  | 0.25        | 76.91666667  | 0.014755511 | NA | NA | hypothetical protein |
| BLD1934 CDS Beta-glucosidase-related | 0.25        | 77.08333333  | 0.014723607 | NA | NA | hypothetical protein |
| Bbre0542 CDS CDS                     | 0.1         | 31           | 0.014644448 | NA | NA | hypothetical protein |
| TS29Rum20468 CDS CDS                 | 0.5         | 156          | 0.014550573 | NA | NA | hypothetical protein |
| BL0304 CDS hypothetical              | 0.25        | 82.33333333  | 0.013784753 | NA | NA | hypothetical protein |
| Rena2449 CDS CDS                     | 0.058823529 | 19.83333333  | 0.013464495 | NA | NA | hypothetical protein |
| Cbar1018 CDS CDS                     | 0.25        | 87.41666667  | 0.012983161 | NA | NA | hypothetical protein |
| BAD0020 CDS hypothetical             | 0.333333333 | 117          | 0.012933843 | NA | NA | hypothetical protein |
| BL0627 CDS hypothetical              | 0.25        | 91.33333333  | 0.012426402 | NA | NA | hypothetical protein |
| TS29Fae07202 CDS CDS                 | 0.5         | 198.5        | 0.011435211 | NA | NA | hypothetical protein |
| BLD1519 CDS hypothetical             | 0.25        | 108.25       | 0.010484477 | NA | NA | hypothetical protein |
| Even0582 CDS CDS                     | 0.25        | 110.5        | 0.010270993 | NA | NA | hypothetical protein |
| TS28Bif5288 CDS CDS                  | 0.25        | 116.5        | 0.009742014 | NA | NA | hypothetical protein |
| TS29Bif4127 CDS CDS                  | 0.25        | 120.4166667  | 0.009425146 | NA | NA | hypothetical protein |
| Ceut2216 CDS CDS                     | 0.090909091 | 43.97777778  | 0.009384448 | NA | NA | hypothetical protein |
| TS29Bif3218 CDS CDS                  | 0.25        | 131.5        | 0.008630758 | NA | NA | hypothetical protein |
| TS29Bif3556 CDS CDS                  | 0.333333333 | 209.08333333 | 0.007237591 | NA | NA | hypothetical protein |
| TS28Bif2171 CDS CDS                  | 0.333333333 | 228.58333333 | 0.006620166 | NA | NA | hypothetical protein |
| Robe2666 CDS CDS                     | 0.25        | 180.3166667  | 0.006294175 | NA | NA | hypothetical protein |
| Rtor1333 CDS CDS                     | 0.25        | 180.3166667  | 0.006294175 | NA | NA | hypothetical protein |
| EUBREC3583 CDS hypothetical          | 0.1         | 98.41666667  | 0.004612815 | NA | NA | hypothetical protein |
| TS29Bif0022 CDS CDS                  | 0.25        | 299.08333333 | 0.003794744 | NA | NA | hypothetical protein |

**Table S13: Assembly statistics for unmapped DNA sequences.**

|                                         |            |
|-----------------------------------------|------------|
| <b>Reads assembled</b>                  | 563,275    |
| <b>Reads partially assembled</b>        | 212,836    |
| <b>Singleton reads</b>                  | 508,756    |
| <b>Repeat reads</b>                     | 35,962     |
| <b>Outlier reads</b>                    | 6,429      |
| <b>Short reads</b>                      | 16,063     |
| <b>%Reads assembled</b>                 | 41.93      |
| <b>Total number reads</b>               | 1,343,321  |
|                                         |            |
| <b>Number large contigs<sup>a</sup></b> | 38,748     |
| <b>Bases in large contigs</b>           | 35,063,243 |
| <b>Average large contig size</b>        | 904        |
| <b>N50 large contig size</b>            | 924        |
| <b>Largest contig size</b>              | 95,032     |
|                                         |            |
| <b>Total number of contigs</b>          | 106,978    |
| <b>Total bases in contigs</b>           | 57,485,012 |

<sup>a</sup>Large contigs were defined as >500bp.

**Table S14: Summary of 16S rRNA gene sequence datasets.**

| <b>Name</b> | <b>Number of reads</b> | <b>Number of clean reads</b> |
|-------------|------------------------|------------------------------|
| Artificial  | 46,249                 | 31,937                       |
| Even1       | 64,373                 | 54,227                       |
| Even2       | 54,344                 | 45,579                       |
| Even3       | 68,446                 | 54,729                       |
| Uneven1     | 54,762                 | 45,440                       |
| Uneven2     | 52,004                 | 44,597                       |
| Uneven3     | 61,901                 | 51,451                       |
| TS28        | 1,500,681              | 951,289                      |
| TS29        | 1,186,582              | 603,274                      |

*Legend* - The initial read number and the number of reads remaining after filtering for low quality reads ('clean reads') are shown.



**Table S15: PCR per base error probabilities derived from the three evenly distributed mock community datasets.**

| Real/<br>Observed | A       | C      | T      | G      |
|-------------------|---------|--------|--------|--------|
| A                 | 0.9995  | 7.2e-6 | 7.7e-6 | 5.1e-4 |
| C                 | 1.1e-05 | 0.9996 | 4.1e-4 | 2.1e-6 |
| T                 | 9.0e-6  | 5.7e-4 | 0.9994 | 1.4e-5 |
| G                 | 3.5e-4  | 3.2e-6 | 2.1e-5 | 0.9996 |

**Table S16: Number of de-noised sequences and proportion classified 'good', bimeric', 'trimeric', 'quadrameric', and 'unclassified' for the seven test community datasets.**

| Category   | Total | Good      | Bimeric     | Trimeric   | Quadrameric | Unclassified |
|------------|-------|-----------|-------------|------------|-------------|--------------|
| Artificial | 116   | 91(78.4%) | 21(18.1%)   | 0(0%)      | 0(0%)       | 4(3.4%)      |
| Even1      | 1785  | 81(4.5%)  | 1386(77.6%) | 200(11.2%) | 4(0.2%)     | 114(6.4%)    |
| Even2      | 1562  | 83(5.3%)  | 1216(77.8%) | 187(2.0%)  | 4(0.3%)     | 72(4.6%)     |
| Even3      | 1679  | 84(5.0%)  | 1331(79.3%) | 147(8.8%)  | 2(0.1%)     | 115(6.8%)    |
| Uneven1    | 813   | 74(9.1%)  | 582(71.6%)  | 61(7.5%)   | 1(0.1%)     | 95(11.7%)    |
| Uneven2    | 641   | 64(10.0%) | 487(76.0%)  | 57(8.9%)   | 2(0.3%)     | 31(4.8%)     |
| Uneven3    | 804   | 69(8.6%)  | 620(77.1%)  | 64(8.0%)   | 0(0%)       | 51(6.3%)     |

**Table S17: Frequencies of sequence co-occurrence over the three 'Uneven' datasets by category.**

| Category     | Total | Once        | Twice     | Thrice    |
|--------------|-------|-------------|-----------|-----------|
| Good         | 97    | 34(35.1%)   | 31(32.0%) | 32(33.0%) |
| Bimeric      | 1524  | 1450(95.1%) | 69(4.5%)  | 5(0.3%)   |
| Trimeric     | 177   | 176(99.4%)  | 1(0.6%)   | 0(0.0%)   |
| Quadrameric  | 3     | 3(100.0%)   | 0(0.0%)   | 0(0.0%)   |
| Unclassified | 169   | 165(97.6%)  | 2(1.2%)   | 2(1.2%)   |
| All          | 1970  | 1828(92.8%) | 103(5.2%) | 39(2.0%)  |

**Table S18: Validation of chimera classification on datasets not used in training (50% probability cutoff for chimera definition).**

| Dataset      | Artificial     |            | Uneven1   |            | Uneven2   |            | Uneven3   |            |
|--------------|----------------|------------|-----------|------------|-----------|------------|-----------|------------|
|              | Good           | Chimeric   | Good      | Chimeric   | Good      | Chimeric   | Good      | Chimeric   |
| Good         | 89(97.8%)      | 2(2.2%)    | 68(91.9%) | 6(8.1%)    | 57(89.1%) | 7(10.9%)   | 59(85.5%) | 10(14.5%)  |
| Bimeric      | 0(0.0%)        | 21(100.0%) | 6(1.0%)   | 576(99.0%) | 8(1.6%)   | 479(98.4%) | 6(1.0%)   | 614(99.0%) |
| Trimeric     | - <sup>a</sup> | -          | 3(4.9%)   | 58(95.1%)  | 1(1.8%)   | 56(98.2%)  | 0(0.0%)   | 64(100.0%) |
| Quadrameric  | -              | -          | 0(0.0%)   | 1(100%)    | 1(50%)    | 1(50%)     | -         | -          |
| Unclassified | 4(100.0%)      | 0(0%)      | 24(25.3%) | 71(74.7%)  | 6(19.4%)  | 25(80.6%)  | 13(25.5%) | 38(74.5%)  |

<sup>a</sup>Dashes indicate categories in a given dataset with no observed chimeras.

**Table S19: Validation of chimera classification using sequence abundance information on datasets not used in training (50% probability cutoff for chimera definition).**

| Dataset      | Artificial     |            | Uneven1   |            | Uneven2   |            | Uneven3   |            |
|--------------|----------------|------------|-----------|------------|-----------|------------|-----------|------------|
|              | Good           | Chimeric   | Good      | Chimeric   | Good      | Chimeric   | Good      | Chimeric   |
| Good         | 90(98.9%)      | 1(1.1%)    | 69(93.2%) | 5(6.8%)    | 59(92.2%) | 5(7.8%)    | 62(89.9%) | 7(10.1%)   |
| Bimeric      | 0(0.0%)        | 21(100.0%) | 3(0.5%)   | 579(99.5%) | 5(1.0%)   | 482(99.0%) | 4(0.6%)   | 616(99.4%) |
| Trimeric     | - <sup>a</sup> | -          | 1(1.6%)   | 60(98.4%)  | 1(1.8%)   | 56(98.2%)  | 0(0.0%)   | 64(100.0%) |
| Quadrameric  | -              | -          | 0(0.0%)   | 1(100.0%)  | 1(50.0%)  | 1(50.0%)   | -         | -          |
| Unclassified | 3(75.0%)       | 1(25.0%)   | 19(20.0%) | 76(80.0%)  | 6(19.4%)  | 25(80.6%)  | 12(23.5%) | 38(76.5%)  |

<sup>a</sup>Dashes indicate categories in a given dataset with no observed chimeras.

**Table S20: Observed and total diversity estimates of 97%ID phylotypes for the three 'Uneven' mock communities.**

| Dataset | Sample Size | Diversity | Chao | Log-normal          | Sichel             |
|---------|-------------|-----------|------|---------------------|--------------------|
| Uneven1 | 43,190      | 75        | 156  | 94; <b>146</b> ;338 | 81; <b>96</b> ;141 |
| Uneven2 | 42,575      | 58        | 94   | 71; <b>112</b> ;312 | 61; <b>73</b> ;103 |
| Uneven3 | 49,789      | 63        | 73   | 77; <b>119</b> ;289 | 68; <b>80</b> ;108 |

*Legend* - The results from fitting the log-normal and Sichel distributions are **medians** with 95% confidence intervals from the posterior distribution (11).

**Table S21: Chimera removal from the de-noised deeply sequenced TS28 and TS29 16S rRNA datasets.**

| Dataset             | No. reads | No. chimeric reads | No. de-noised sequences | No. chimeric sequences |
|---------------------|-----------|--------------------|-------------------------|------------------------|
| <b>TS28-Deep</b>    | 951,274   | 102,762(10.8%)     | 9,251                   | 8,722(94.3%)           |
| <b>TS29-Deep</b>    | 603,263   | 49,847(8.2%)       | 4,012                   | 3,629(90.5%)           |
| <b>TS28-Shallow</b> | 3,733     | 445(11.9%)         | 536                     | 384(71.6%)             |
| <b>TS29-Shallow</b> | 1,401     | 223(15.9%)         | 254                     | 163(64.2%)             |

*Legend* - Number (No.) of reads before and after chimera removal (50% classification cut-off with abundance information) and the same for de-noised sequences. The slight reduction in read number over “clean reads” in **Table S14** is due to removal of any reads with a homopolymer of length  $\geq 10$ nt.

**Table S22: Percentage 97%ID phylotype overlaps between fecal 16S rRNA datasets from MZ co-twins.**

| Dataset             | TS28  | TS28-Shallow | TS29  | TS29-Shallow |
|---------------------|-------|--------------|-------|--------------|
| <b>TS28-Deep</b>    | 100%  | 25.3%        | 35.9% | 10.4%        |
| <b>TS28-Shallow</b> | 88.4% | 100%         | 50.7% | 23.2%        |
| <b>TS29-Deep</b>    | 49.1% | 19.9%        | 100%  | 20.2%        |
| <b>TS29-Shallow</b> | 62.5% | 40.0%        | 88.7% | 100%         |

*Legend* - The percentage of 97%ID phylotypes from each dataset (rows) found in each other dataset (columns).

**Table S23: Percentage 95%ID phylotype overlaps between fecal 16S rRNA datasets from co-twins.**

| Dataset             | TS28  | TS28-Shallow | TS29  | TS29-Shallow |
|---------------------|-------|--------------|-------|--------------|
| <b>TS28-Deep</b>    | 100%  | 27.1%        | 39.0% | 11.6%        |
| <b>TS28-Shallow</b> | 95.1% | 100%         | 59.3% | 26.8%        |
| <b>TS29-Deep</b>    | 52.8% | 23.0%        | 100%  | 21.1%        |
| <b>TS29-Shallow</b> | 68.5% | 45.2%        | 91.8% | 100%         |

*Legend* - The percentage of 95%ID phylotypes from each dataset (rows) found in each other dataset (columns).

**Table S24: Deviance Information Criterion (DIC) values for Bayesian fits of the log-normal, inverse-Gaussian, log-Student's t and Sichel distributions to the 97%ID phylotype abundance distributions of the MZ co-twin's 16S rRNA datasets.**

| Dataset      | Log-normal | Inverse-Gaussian | Log-Student's t | Sichel |
|--------------|------------|------------------|-----------------|--------|
| TS28-Deep    | 836.4      | 910.5            | 837.6           | 829.4  |
| TS29-Deep    | 621.7      | 675.8            | 623.2           | 617.1  |
| TS28-Shallow | 127.6      | n.c.             | 128.9           | 127.25 |
| TS29-Shallow | 59.6       | n.c.             | 60.6            | 60.0   |

*Legend* - Some fits labeled n.c. failed to converge.

**Table S25: Deviance Information Criterion (DIC) values for Bayesian fits of the log-normal, inverse-Gaussian, log-Student's t and Sichel distributions to the 95%ID phylotype abundance distributions of the MZ co-twin's 16S rRNA datasets.**

| Dataset      | Log-normal | Inverse-Gaussian | Log-Student's t | Sichel |
|--------------|------------|------------------|-----------------|--------|
| TS28-Deep    | 754.9      | 817.9            | 755.8           | 749.4  |
| TS29-Deep    | 560.8      | 606.5            | 561.7           | 557.3  |
| TS28-Shallow | 116.5      | 117.9            | 117.5           | 117.0  |
| TS29-Shallow | 61.8       | 62.1             | 62.8            | 62.8   |

**Table S26: Total diversity estimates for Bayesian fits of the log-normal, inverse-Gaussian, log-Student's t and Sichel distributions to the 97%ID phylotype abundance distributions of the MZ co-twin's 16S rRNA datasets.**

| Dataset      | Log-normal    | Inverse-Gaussian | Log-Student's t | Sichel       |
|--------------|---------------|------------------|-----------------|--------------|
| TS28-Deep    | 919;1373;2926 | 516;541;576      | 960;1568;3237   | 724;878;1686 |
| TS29-Deep    | 874;1787;7015 | 394;426;476      | 1002;3270;10045 | 577;768;1812 |
| TS28-Shallow | 537;2119;8803 | n.c.             | 703;5204;16901  | 242;386;830  |
| TS29-Shallow | 364;1920;9664 | n.c.             | 28;162;432      | 134;209;457  |

*Legend* - Results are given as lower 2.5% quantile, 50% quantile (**median**), 97.5% quantile of the posterior distribution. Some fits labeled n.c. failed to converge.

**Table S27: Total diversity estimates for Bayesian fits of the log-normal, inverse-Gaussian, log-Student's t and Sichel distributions to the 95%ID phylotype abundance distributions of the Twins datasets.**

| Dataset      | Log-normal      | Inverse-Gaussian | Log-Student's t | Sichel       |
|--------------|-----------------|------------------|-----------------|--------------|
| TS28-Deep    | 926;1673;9864   | 456;482;521      | 1002;1940;5729  | 598;752;1223 |
| TS29-Deep    | 1174;4647;19411 | 362;402;463      | 1036;4928;14281 | 546;791;1741 |
| TS28-Shallow | 719;5503;31790  | 226;505;4693     | 503;5880;19905  | 455;975;4108 |
| TS29-Shallow | 347;2196;10204  | 133;442;3162     | 174;444;1357    | 96;137;296   |

*Legend* - Results are given as lower 2.5% quantile, 50% quantile (**median**), 97.5% quantile of the posterior distribution.

## SUPPORTING FIGURES

**Fig. S1. Frequency-abundance distributions for the 97%ID phylotypes in the ‘Deep Twins’ 16S rRNA gene sequence datasets. (A,B)** Values from TS28 (panel A) and TS29 (panel B) are shown after noise and chimera removal. The number of phylotypes observed at a given abundance versus abundance is shown. For phylotypes at high abundance, where the data becomes sparser, we aggregated observed abundance bins to achieve a count of at least 20 and then divided by the number of bins aggregated. We subsequently plotted this value against the mean abundance of the aggregated bins. The expected curves from log-normal and Sichel fits are also shown.



**Fig. S2. Genetic diversity of the fecal microbiome. (A)** Distribution of gene clusters across gut microbial genomes and microbiome bins. All protein sequences from 122 gut genomes and the microbiome bins were clustered using cd-hit at 40%ID, 60%ID, and 80%ID. **(B)** The consistency of taxonomic assignment within gene clusters grouped at 40%ID, 60%ID, and 80%ID. Comparisons between gut genome sequences (red), TS28 and TS29 bin sequences (blue), TS28 and gut genome sequences (purple), and TS29 and gut genome sequences (green) are shown.



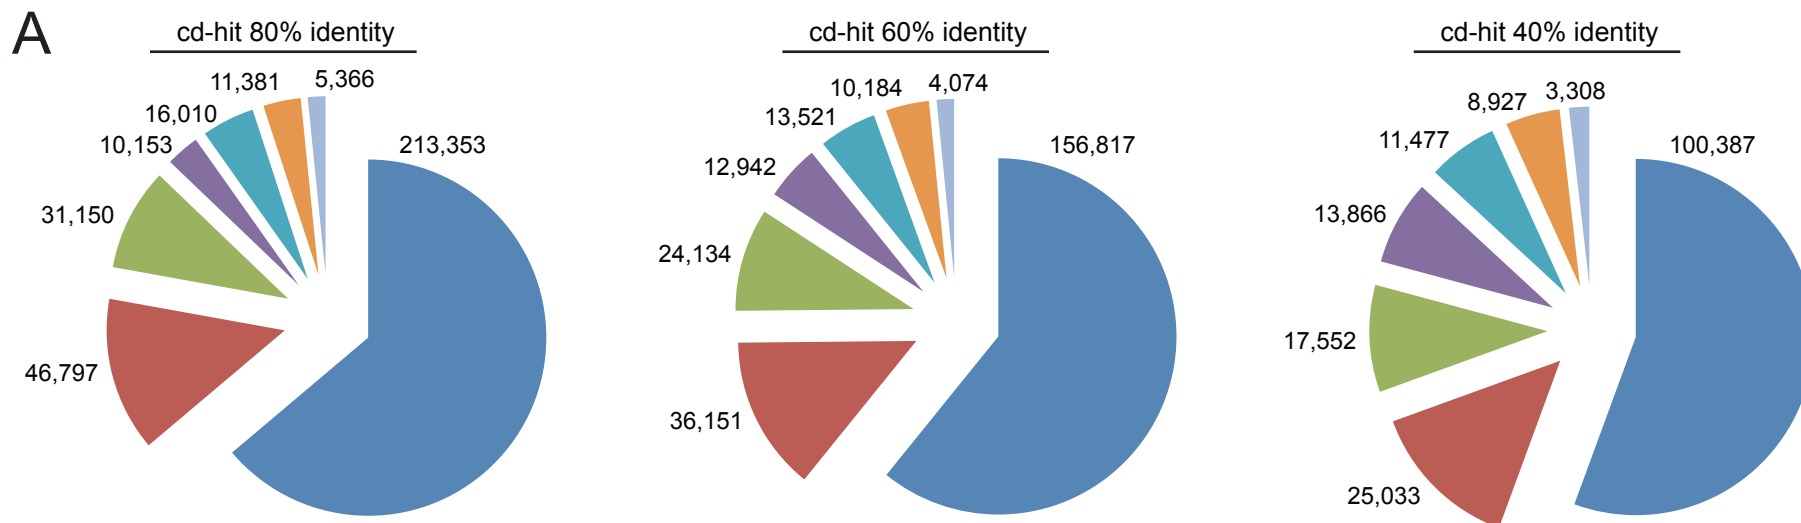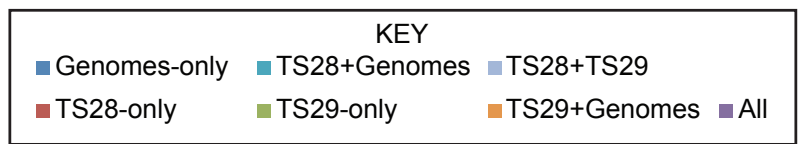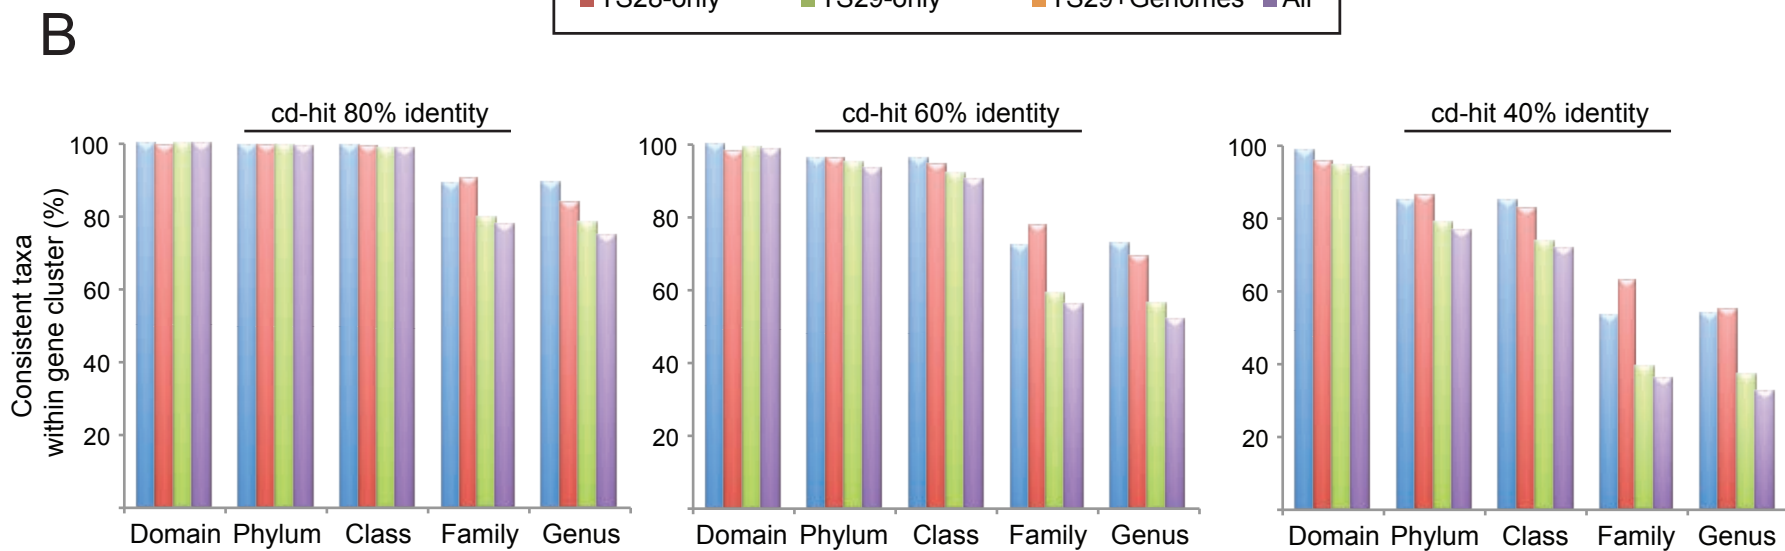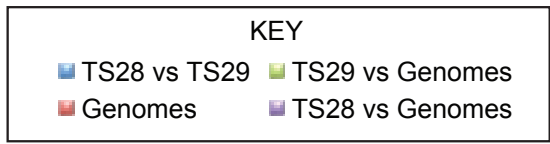

**Fig. S3. Validation of PhyloPythia bins of microbiome scaffolds.** Each copy of 30 different marker genes from each set of scaffolds (blue for TS28, red for TS29) and from the gut microbial genomes (green) was evaluated for consistent taxonomic assignment. Briefly, each set of marker genes were translated into amino acid sequences, aligned using clustalw, and added to a neighbor-joining tree. Individual sequences were assigned to taxa based on the consensus taxonomy of all sequences found at the first node.

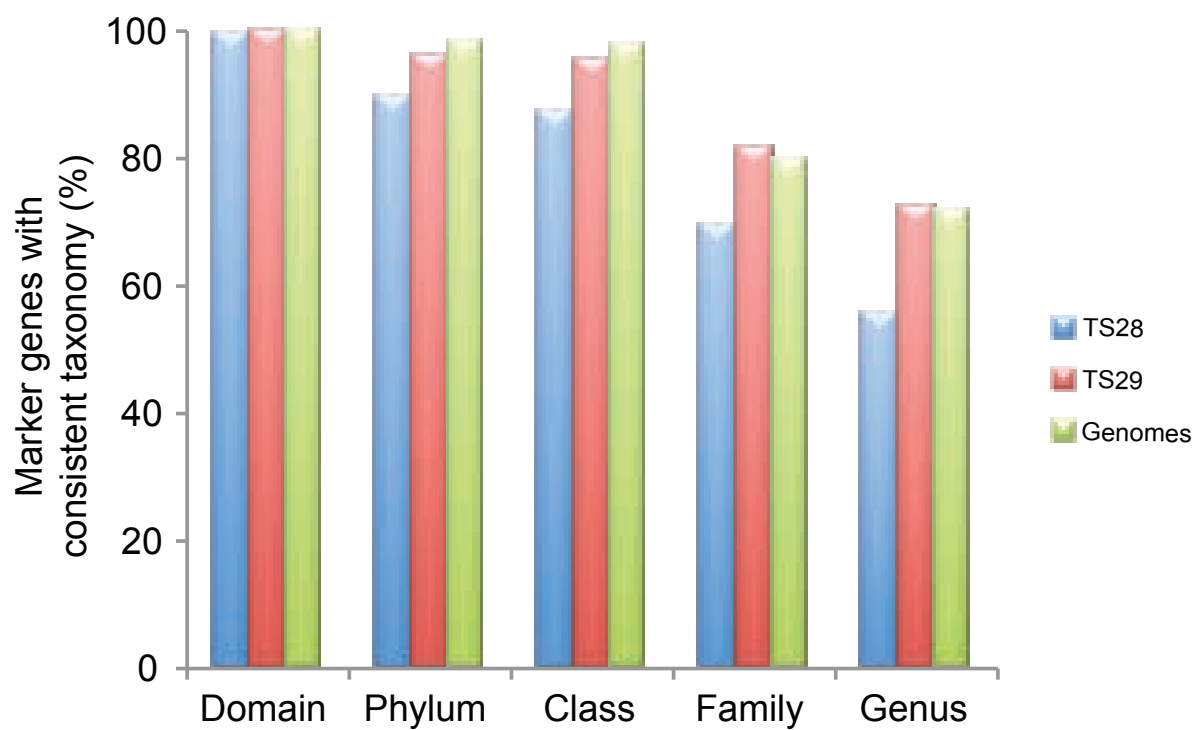

**Fig. S4. Distribution of phylotypes in the mock community datasets and taxonomic profiles from PCR and shotgun sequencing.** (A) Ratio of observed and expected 16S rRNA gene sequences mapped to each species-level phylotype in the three evenly mixed mock communities (Even1, Even2, and Even3). Sequencing reads were aligned globally to reference 16S rRNA gene sequences using the Needleman-Wunsch algorithm ( $\geq 98\%$ ID required for assignment). Two DNA preparations were from genomes from the same phylotype: (i) *Bifidobacterium catenulatum* and *Bifidobacterium pseudocatenulatum*, and (ii) *Providencia rettgeri* and *Providencia alcalifaciens*. Sequences with mismatches in the 8F primer region are indicated with a red bar (single mismatches) or a black bar (multiple mismatches). (B) The observed relative abundance of each phylotype in the unevenly mixed datasets (Uneven1, Uneven2, and Uneven3) as a function of the predicted relative abundance of each phylotype. Predicted relative abundance were calculated based on the average observed relative abundance in the evenly mixed datasets (ObsEven), the expected relative abundance in the evenly mixed datasets (ExpEven), and the expected relative abundance in each unevenly mixed dataset [ExpUneven; i.e. Predicted(ObsUneven) = (ObsEven\*ExpUneven)/ExpEven]. (C) Relative abundance of bacterial classes represented in 16S rRNA gene amplicons (PCR), 16S rRNA gene fragments from shotgun sequenced fecal microbiomes, and the gene content of the fecal microbiomes. 16S rRNA profiles were determined using the RDPClassifier (cutoff=0.8) (15), while gene content profiles were determined by mapping them to a database containing all genes from 122 gut microbial genomes and microbiome bins.

A

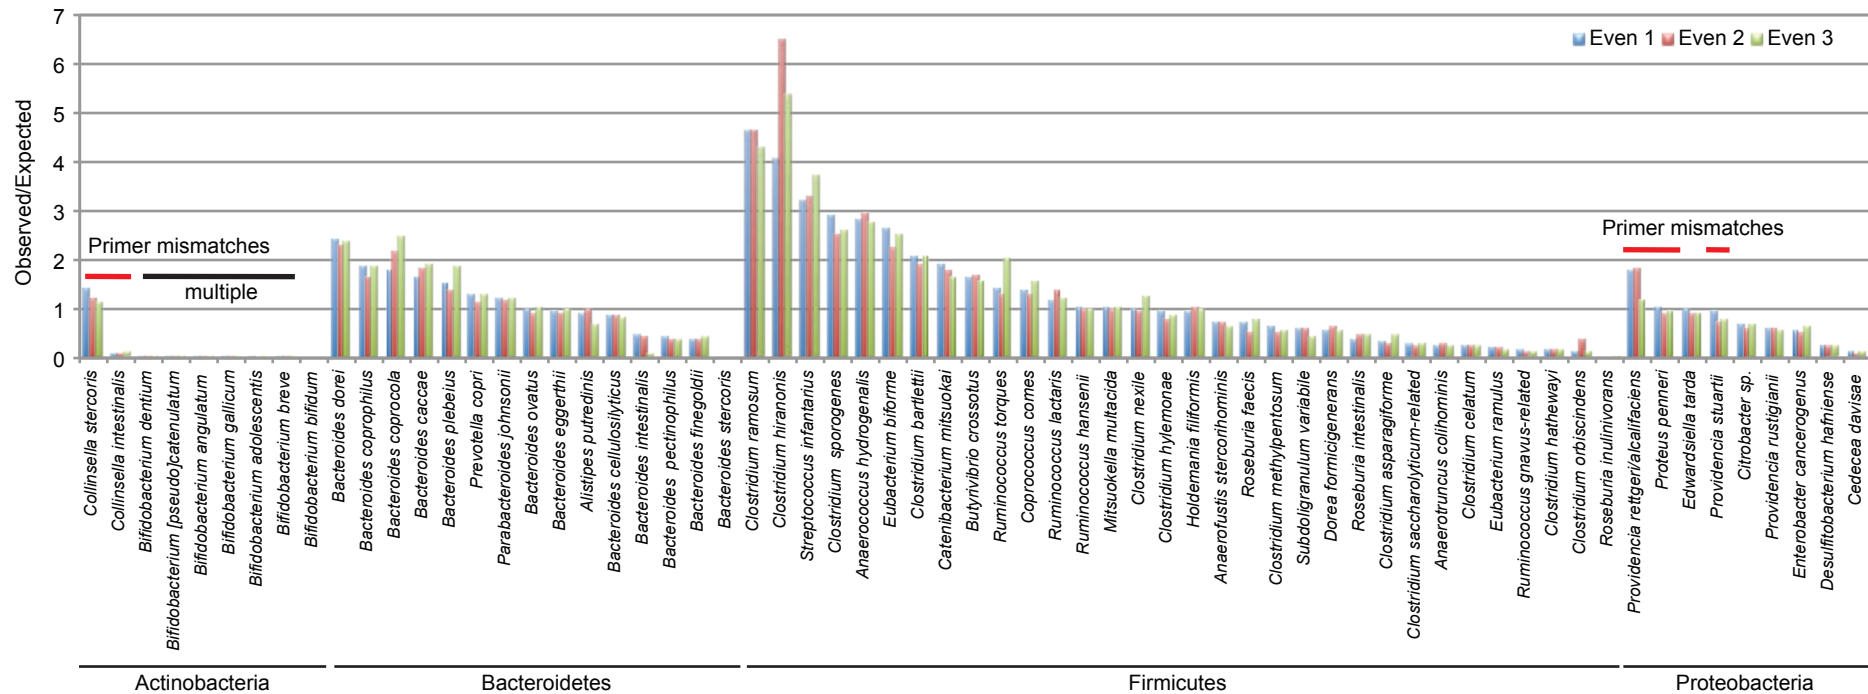

B

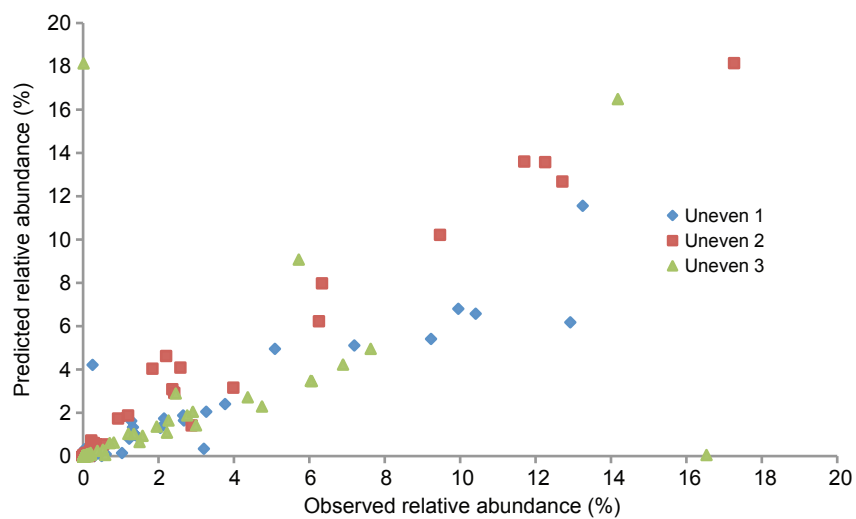

C

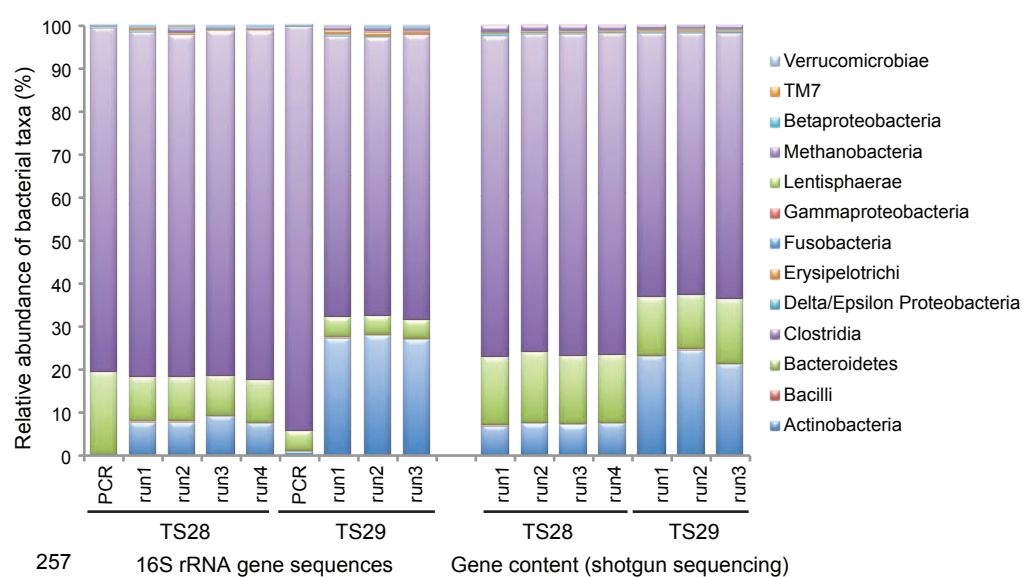

**Fig. S5. Rarefaction analysis of the number of genes assigned to Carbohydrate Active Enzymes (CAZymes) and CAZy families based on DNA and cDNA datasets generated from the fecal microbiomes and metatranscriptomes of TS28 and TS29.**

The number of (A) CAZymes and (B) CAZy families was tallied as a function of sequencing depth after mapping each dataset to the CAZy annotated microbiome bins.

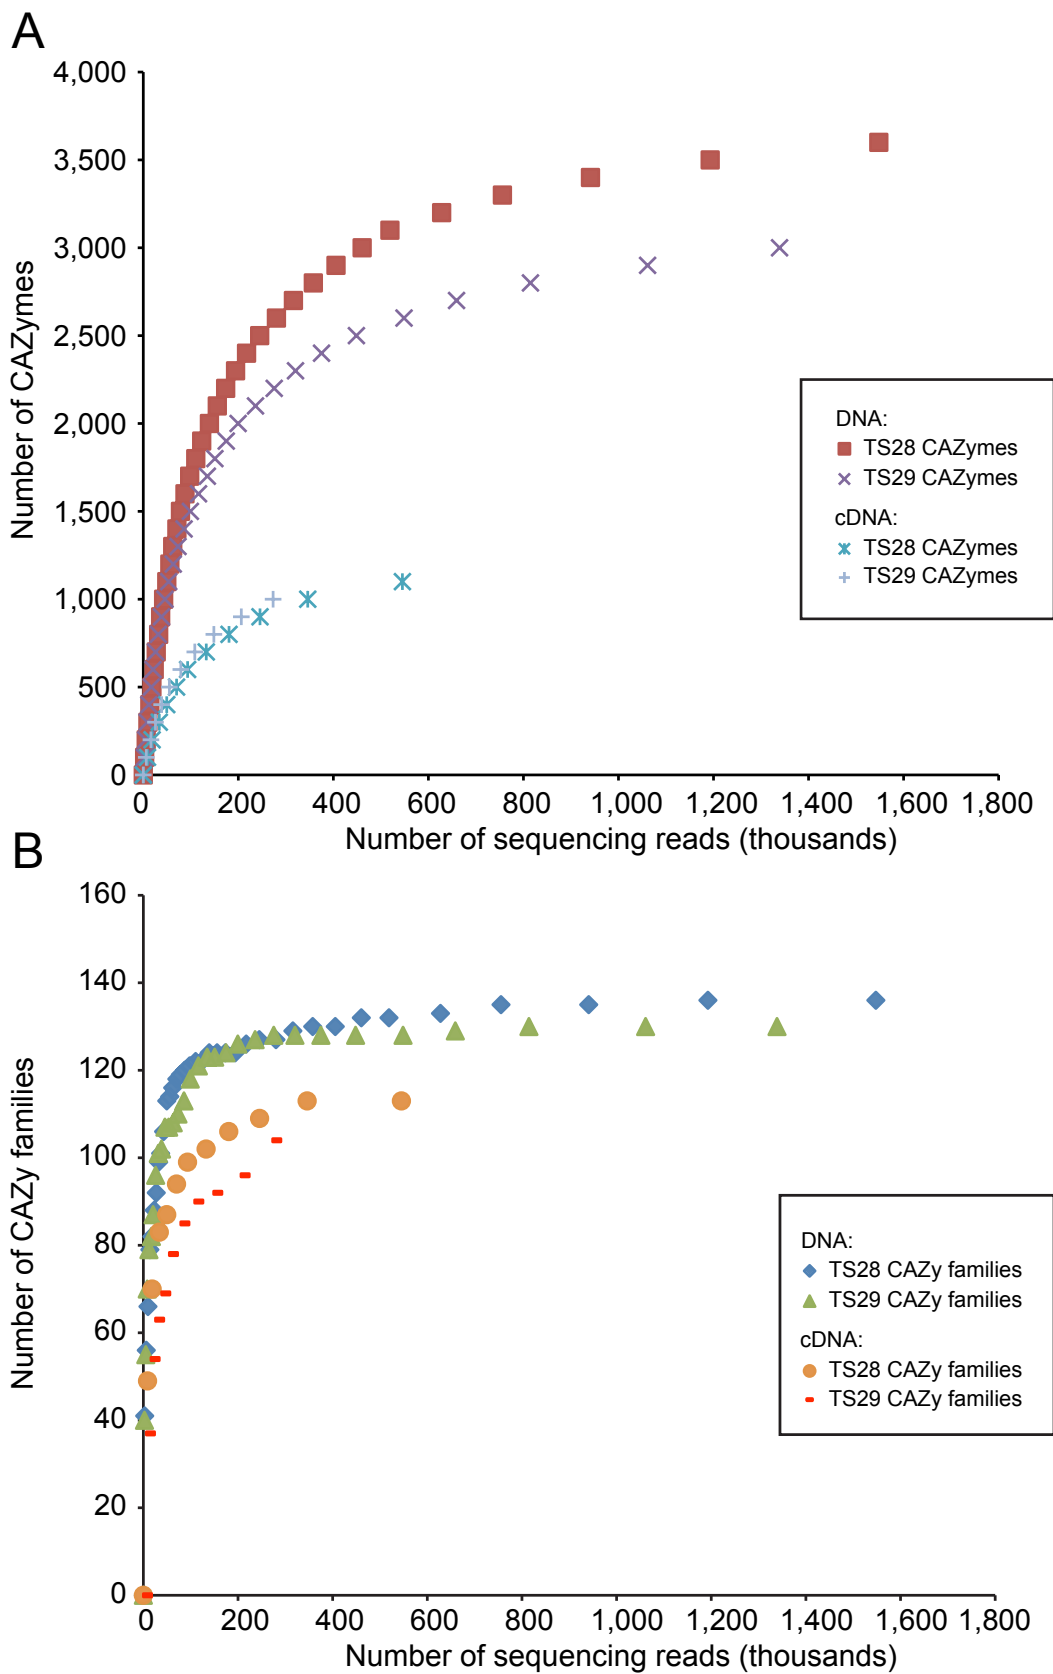

**Fig. S6. UPGMA clustering based on the abundance of gene clusters (DNA) and expressed transcripts (cDNA).** Datasets were clustered and compared with scatterplots according to the relative abundance of gene clusters. Values are shown on a log-scale, with x-axis labels are on the top of the matrix, and y-axis labels are on the left (rep=replicate datasets). 50,000 randomly selected sequences per dataset were used for z-score normalization and UPGMA clustering. Black circles represent clustered nodes (inconsistency threshold=0.75, 'cluster' function in Matlab v7.7.0). Correlations are shown as a heatmap from white ( $R^2=0$ ) to dark red ( $R^2=1$ ). We subsampled each dataset to only include gene clusters from each of 18 different COG functional categories (see **Fig. 3B** for category names). The pattern of clustering of microbiomes and meta-transcriptomes for each individual was detectable across each of the 18 functional categories, and not restricted to housekeeping genes. The number at each node indicates the number of COG categories with consistent clustering compared to that observed with the entire dataset.



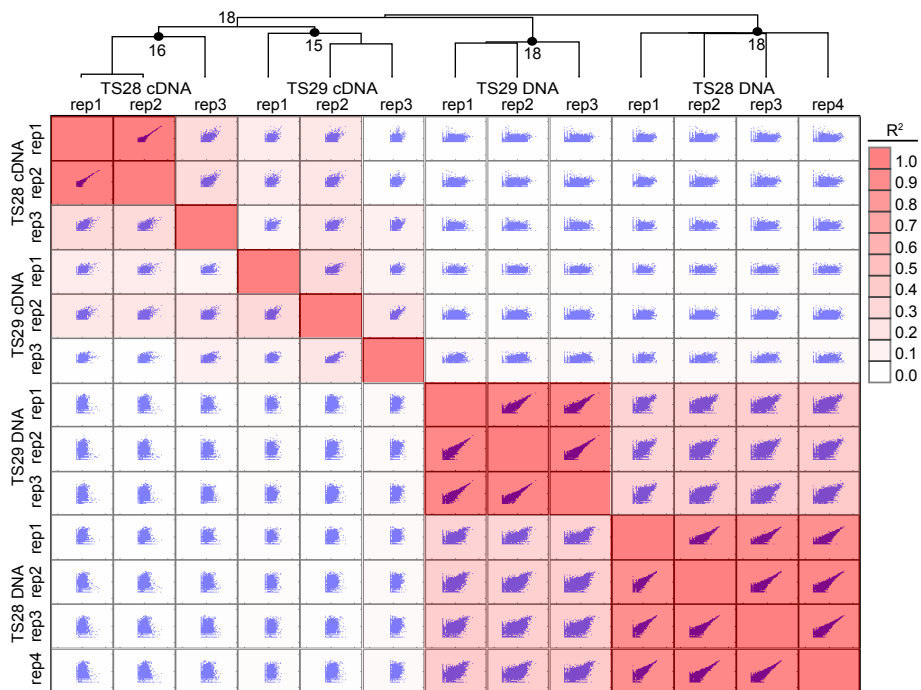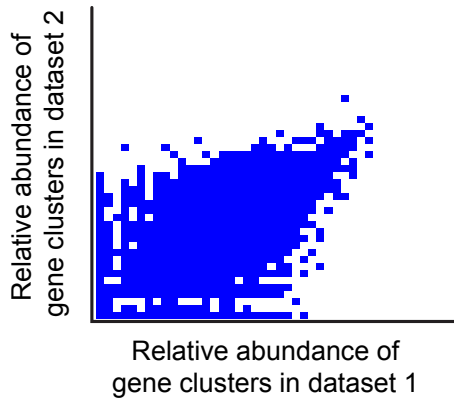

**Fig. S7. Comparison of gene abundance and gene expression in the fecal microbiomes of TS28 and TS29.** (A) The percentage of DNA sequences matching CDS (coding sequences) from genus-level taxa in 122 gut microbial genomes and microbiome bins. (B) The percentage of cDNA sequences matching CDS from each taxa. Columns labeled 'Reads' are weighted based on the number of sequencing reads mapped to each gene. Columns labeled 'Genes' indicate the distribution of genes observed in each fecal microbiome dataset without abundance weighting.

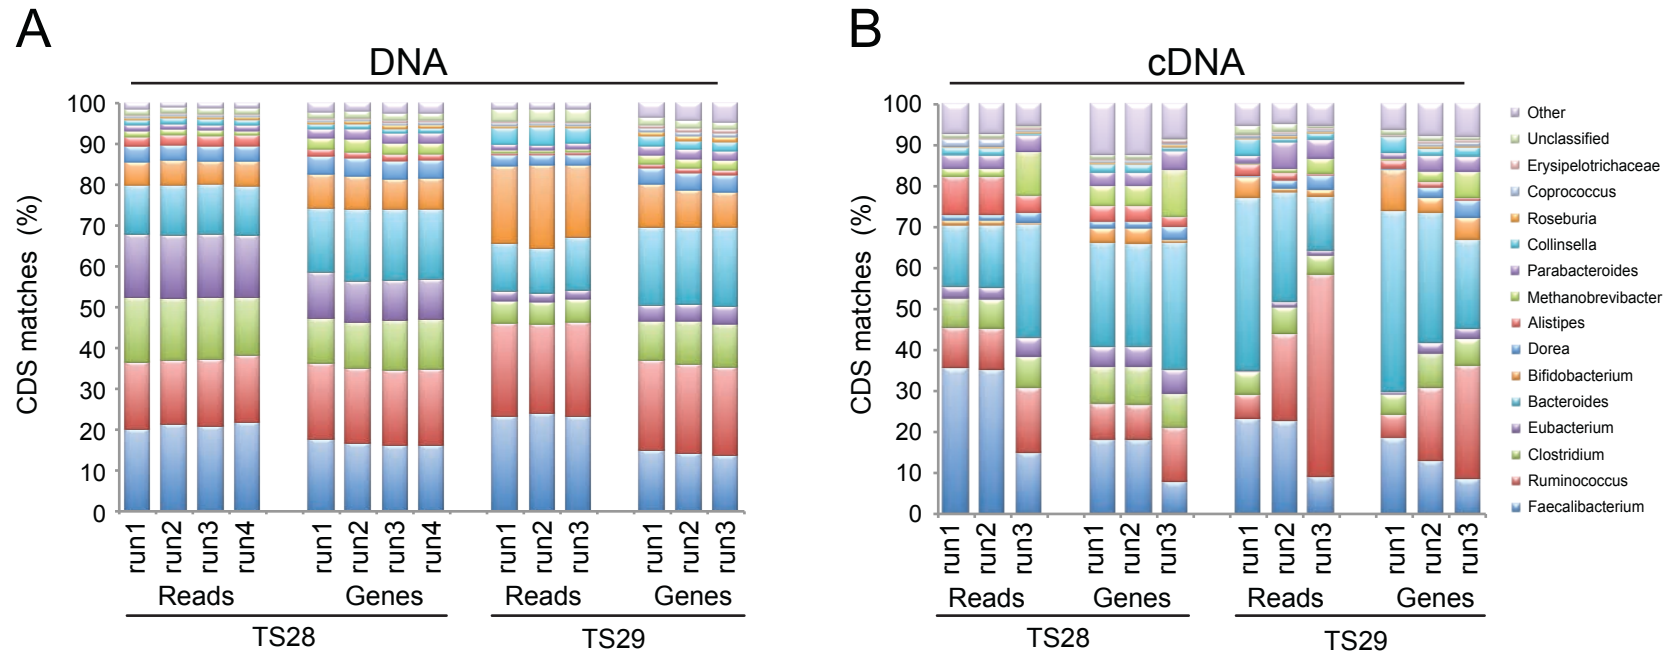

**Fig. S8. Analysis of variation between technical replicates in DNA and cDNA datasets plus KEGG annotation of genes with high or low relative expression. (A)**

The relative abundance of each gene observed in each DNA or cDNA dataset was compared against the relative abundance in each technical replicate (all pairwise comparisons; n=3-4 replicates per sample). A histogram depicting the fraction of shared genes at each ratio is shown for each pairwise comparison. Ratios were defined as the natural log ratio of the relative abundance in replicate 1 versus the relative abundance in replicate 2. The fold-change cutoff used for biological comparisons is indicated by a black box (log ratio=2.3 corresponding to 10-fold difference in relative abundance). **(B)** Clustering of KEGG pathway representation among genes with high relative expression (High-Expr) or low relative expression (Low-Expr) , and genes unique to cDNA or DNA datasets. The relative abundance of KEGG pathway assignments was normalized by z-score across all datasets, clustered with the UPGMA method (average linkage) using Cluster 3.0 (16), and visualized with TreeView (17).

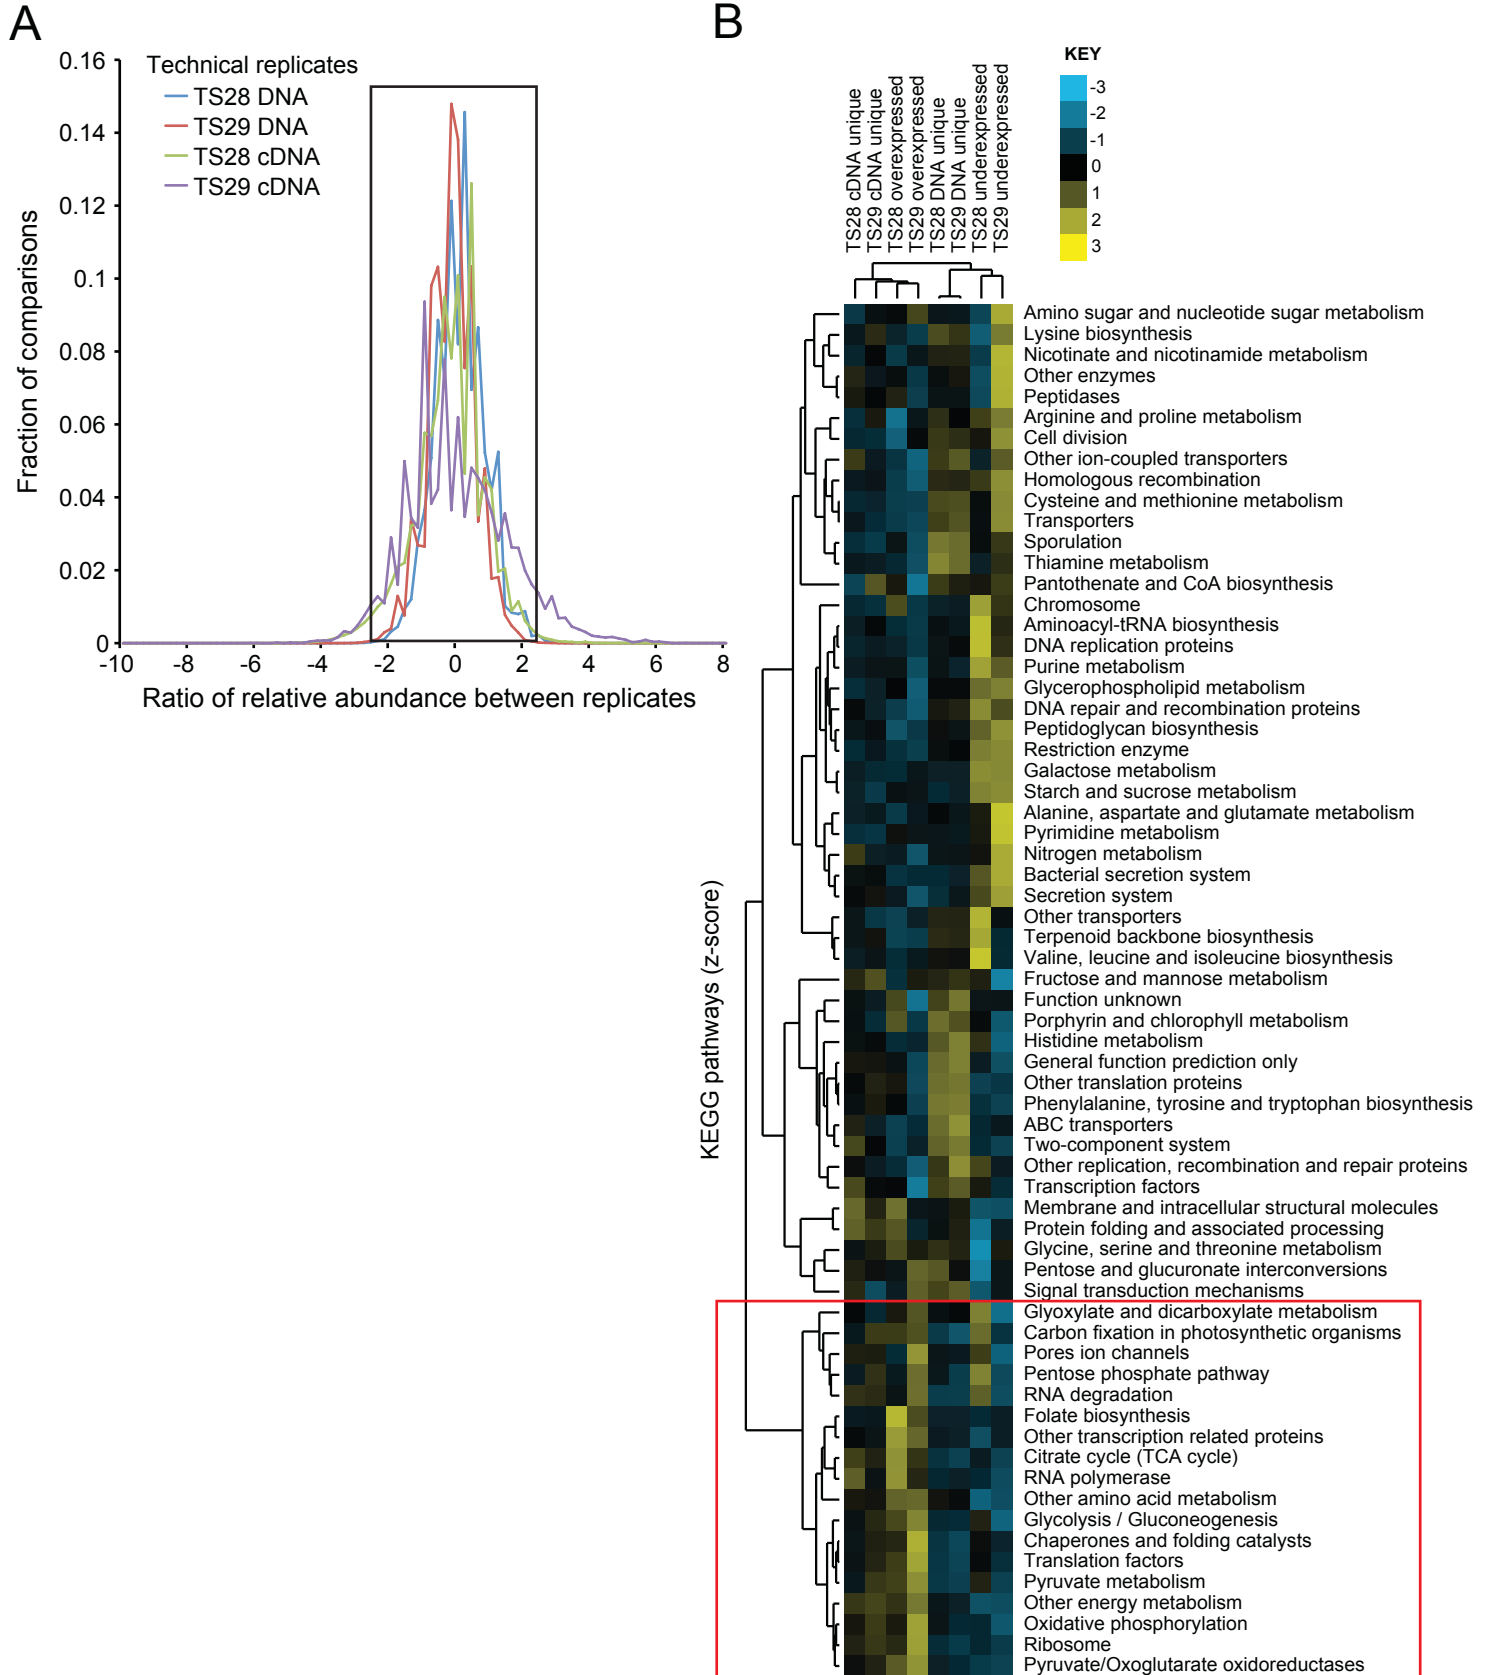

**Fig. S9. Comparison of gene expression and abundance in seven fecal microbiomes representing three MZ twin pairs and an unrelated individual. (A)** Percentage of genes unique to cDNA or DNA datasets assigned to each COG category. Percentages are represented by the area of each colored circle (the black circle labeled 5% provides a reference). The mean of all ‘TSDA’ samples (n=5 representing two MZ twin pairs, other than TS28 and TS29, and an unrelated individual) is shown. Asterisks indicate significant differences between genes unique to the cDNA or DNA datasets from the ‘TSDA’ samples (Student’s t-test;  $P < 0.05$ ). **(B)** Clustering of KEGG pathways in genes unique to cDNA or DNA datasets from TS28, TS29, and the five TSDA datasets. The relative abundance of KEGG pathway assignments was normalized by z-score across all datasets, clustered with the UPGMA method (average linkage) using Cluster 3.0 (16), and visualized with TreeView (17).

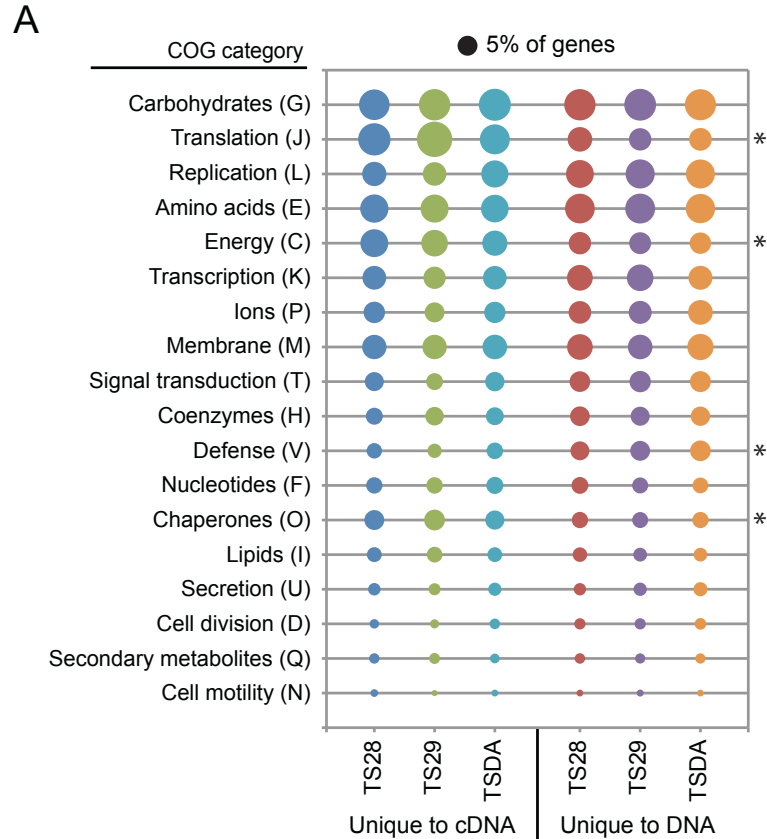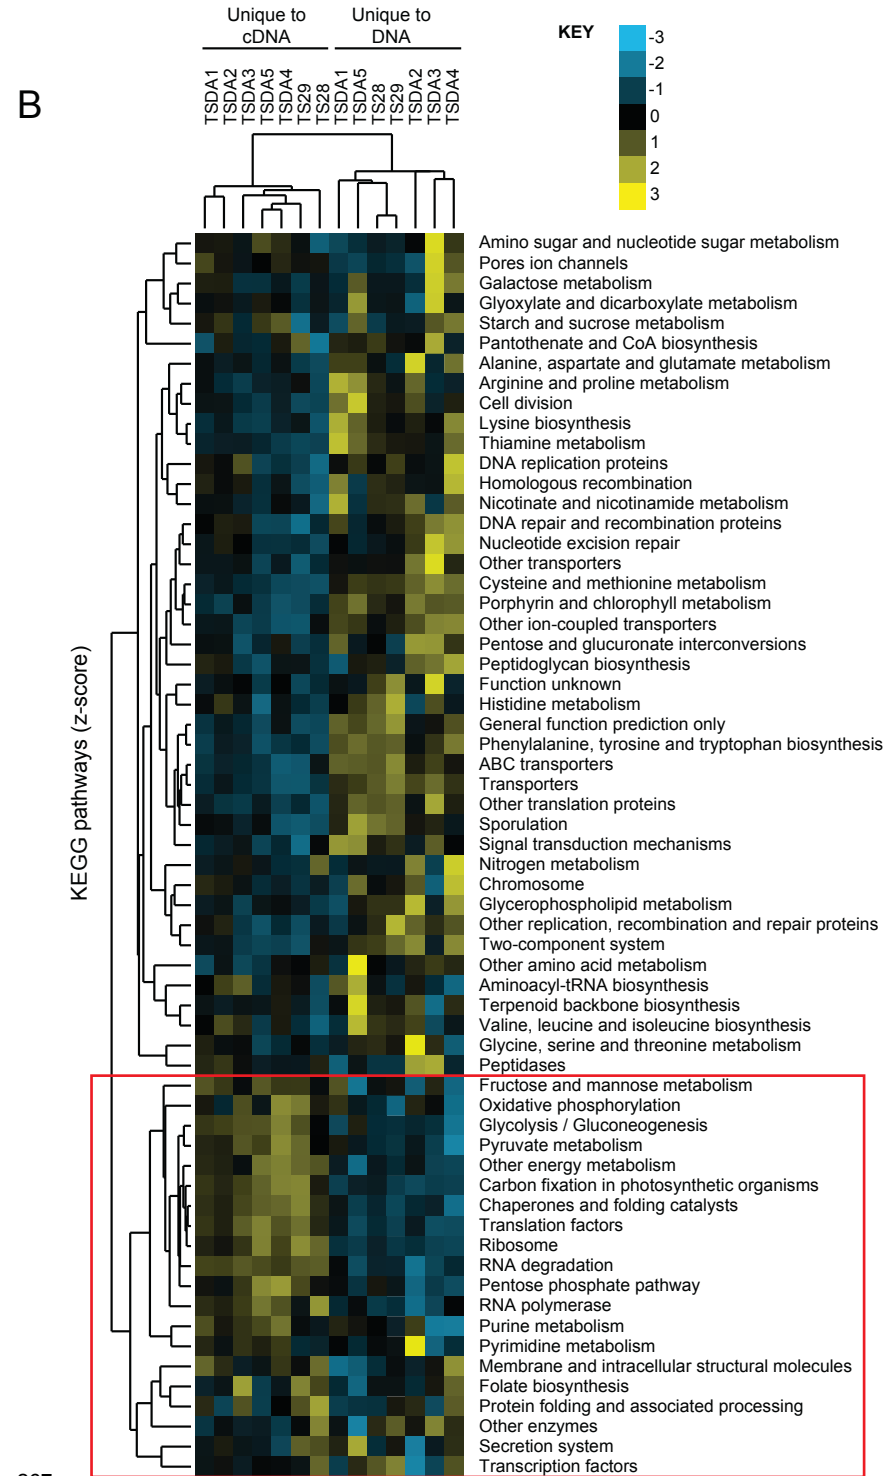

**Fig. S10. Comparison of gene content and transcriptional activity.** Results of mapping **(A)** DNA and **(B)** cDNA sequences to 122 gut microbial genomes and microbiome bins. The number of sequences assigned to 16S rRNA, 23S rRNA, 5S rRNA, CDS (coding sequences), tRNA, and ‘intergenic regions’ (includes mislabeled CDS and miscellaneous noncoding RNAs) was tallied. The combined percentage of assignments is shown as a pie chart above each graph. **(C)** The percentage of DNA sequencing reads that were mapped to CDS or were unmapped is plotted as a function of read length.



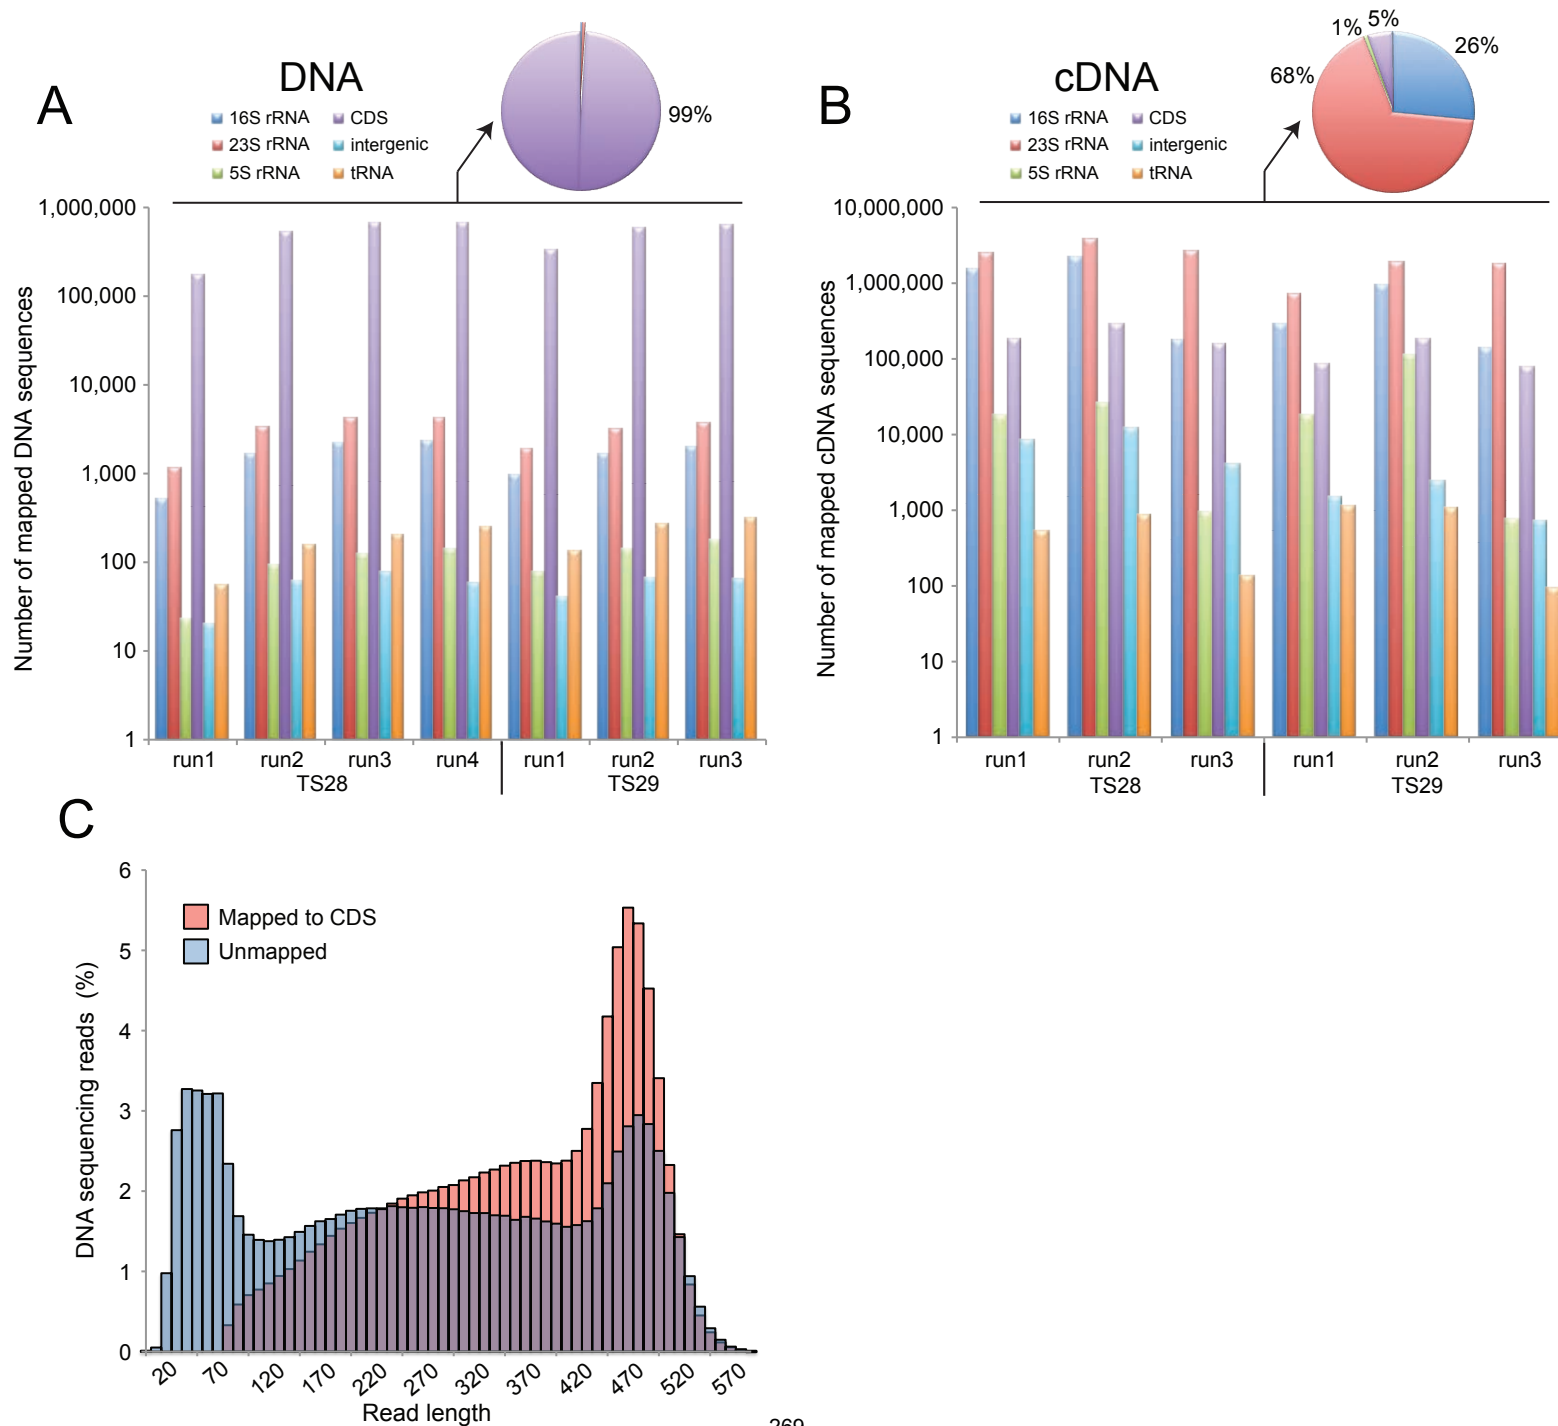

**Fig. S11. The percentage of DNA and cDNA sequences mapped to 122 gut microbial genomes and microbiome bins.** The percentage of (A) DNA or (B) cDNA sequences mapped to microbiome bins (blue), reference genomes (red), or equally well to both (green) is shown. The percentage of (C) DNA or (D) cDNA sequences mapped to TS28 bins (blue), TS29 bins (red), or equally well to both (green) is plotted. (E) The percentage of sequencing reads mapped to a database containing 122 gut genomes with (red) or without (blue) the microbiome bins is noted. Microbiome datasets from the fecal sampling of six adult female MZ twin-pairs and their mothers were analyzed (5).

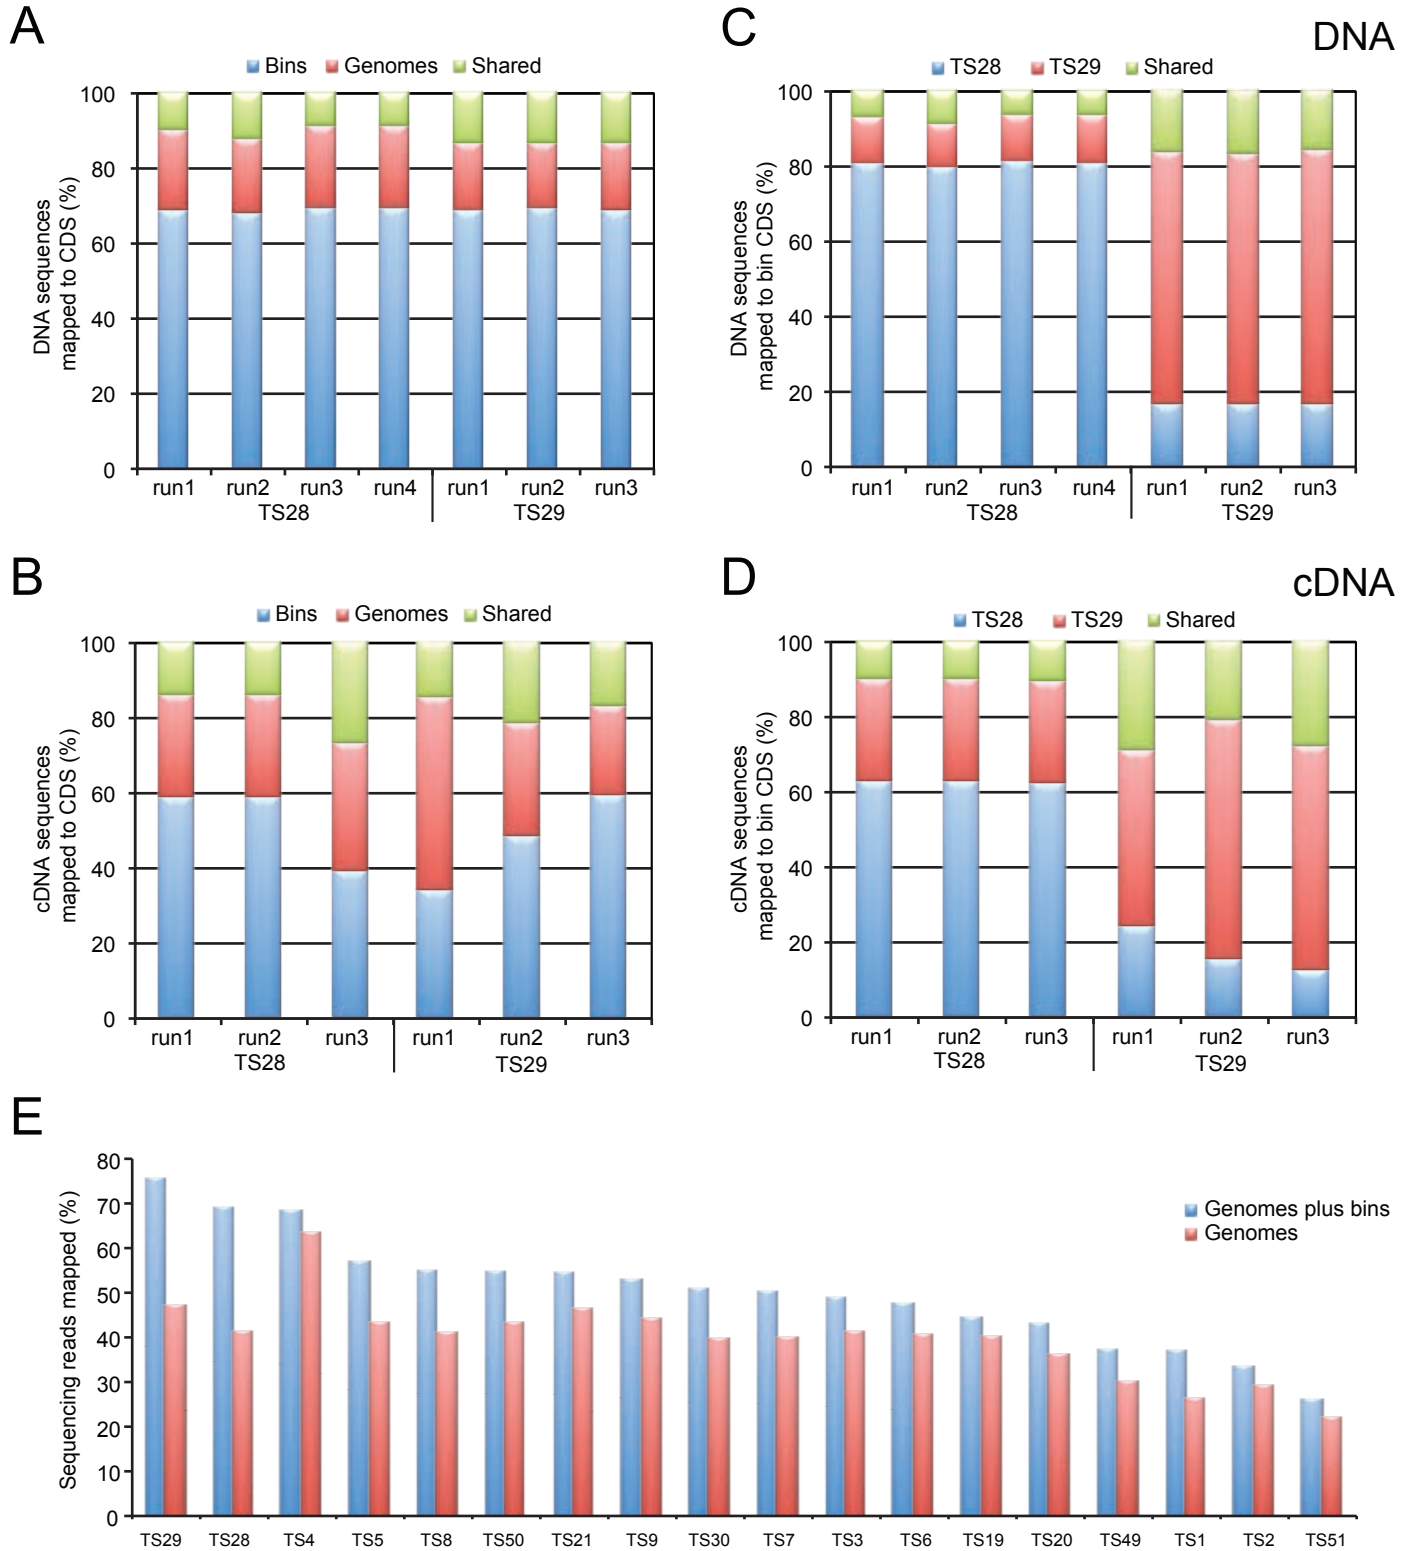

**Fig. S12. Probability distribution of signal intensities for different lengths of homopolymer for the GS FLX implementation (homopolymer length marked on figure).**

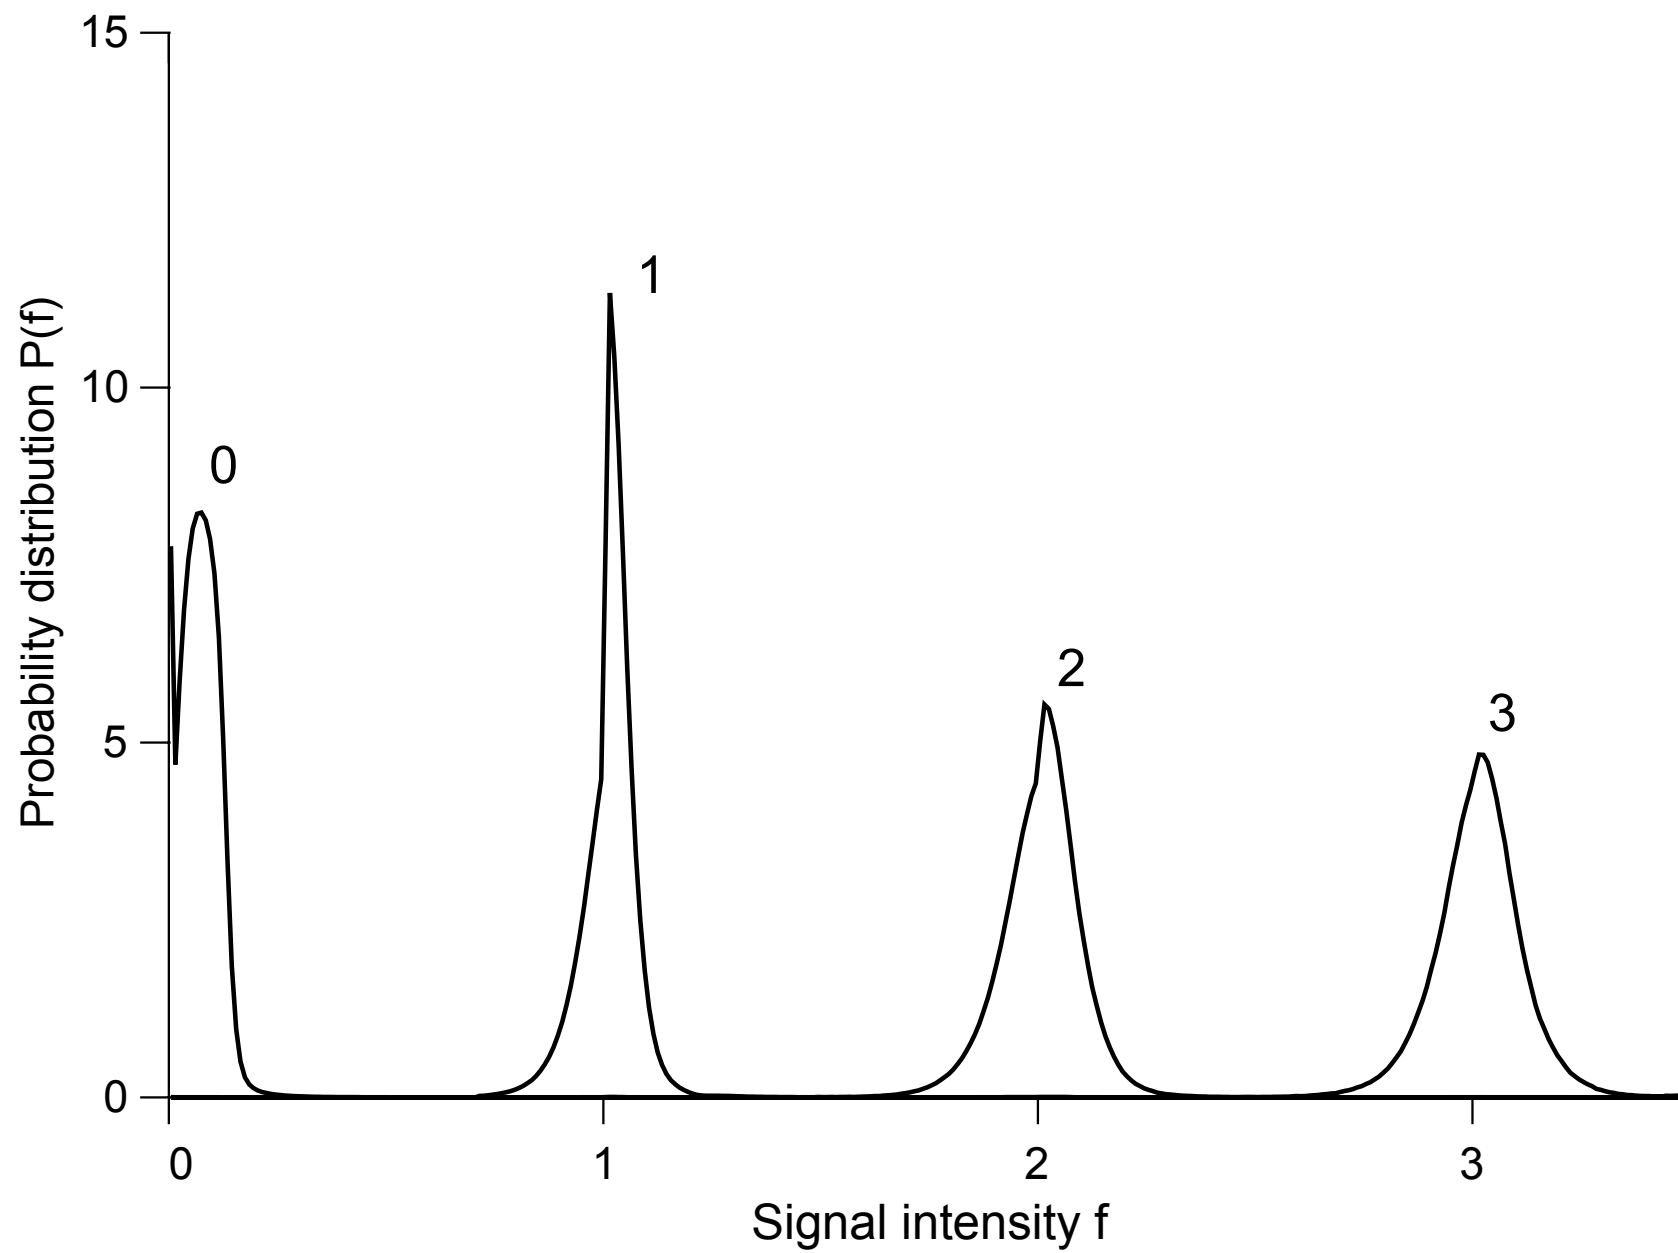

**Fig. S13. Number of phlotypes as a function of sequence difference for complete linkage clustering of the ‘Artificial Community’.** Distances were calculated using exact Needleman-Wunsch pairwise alignments. Results are shown for the filtered sequences and following removal of pyrosequencing and PCR noise.

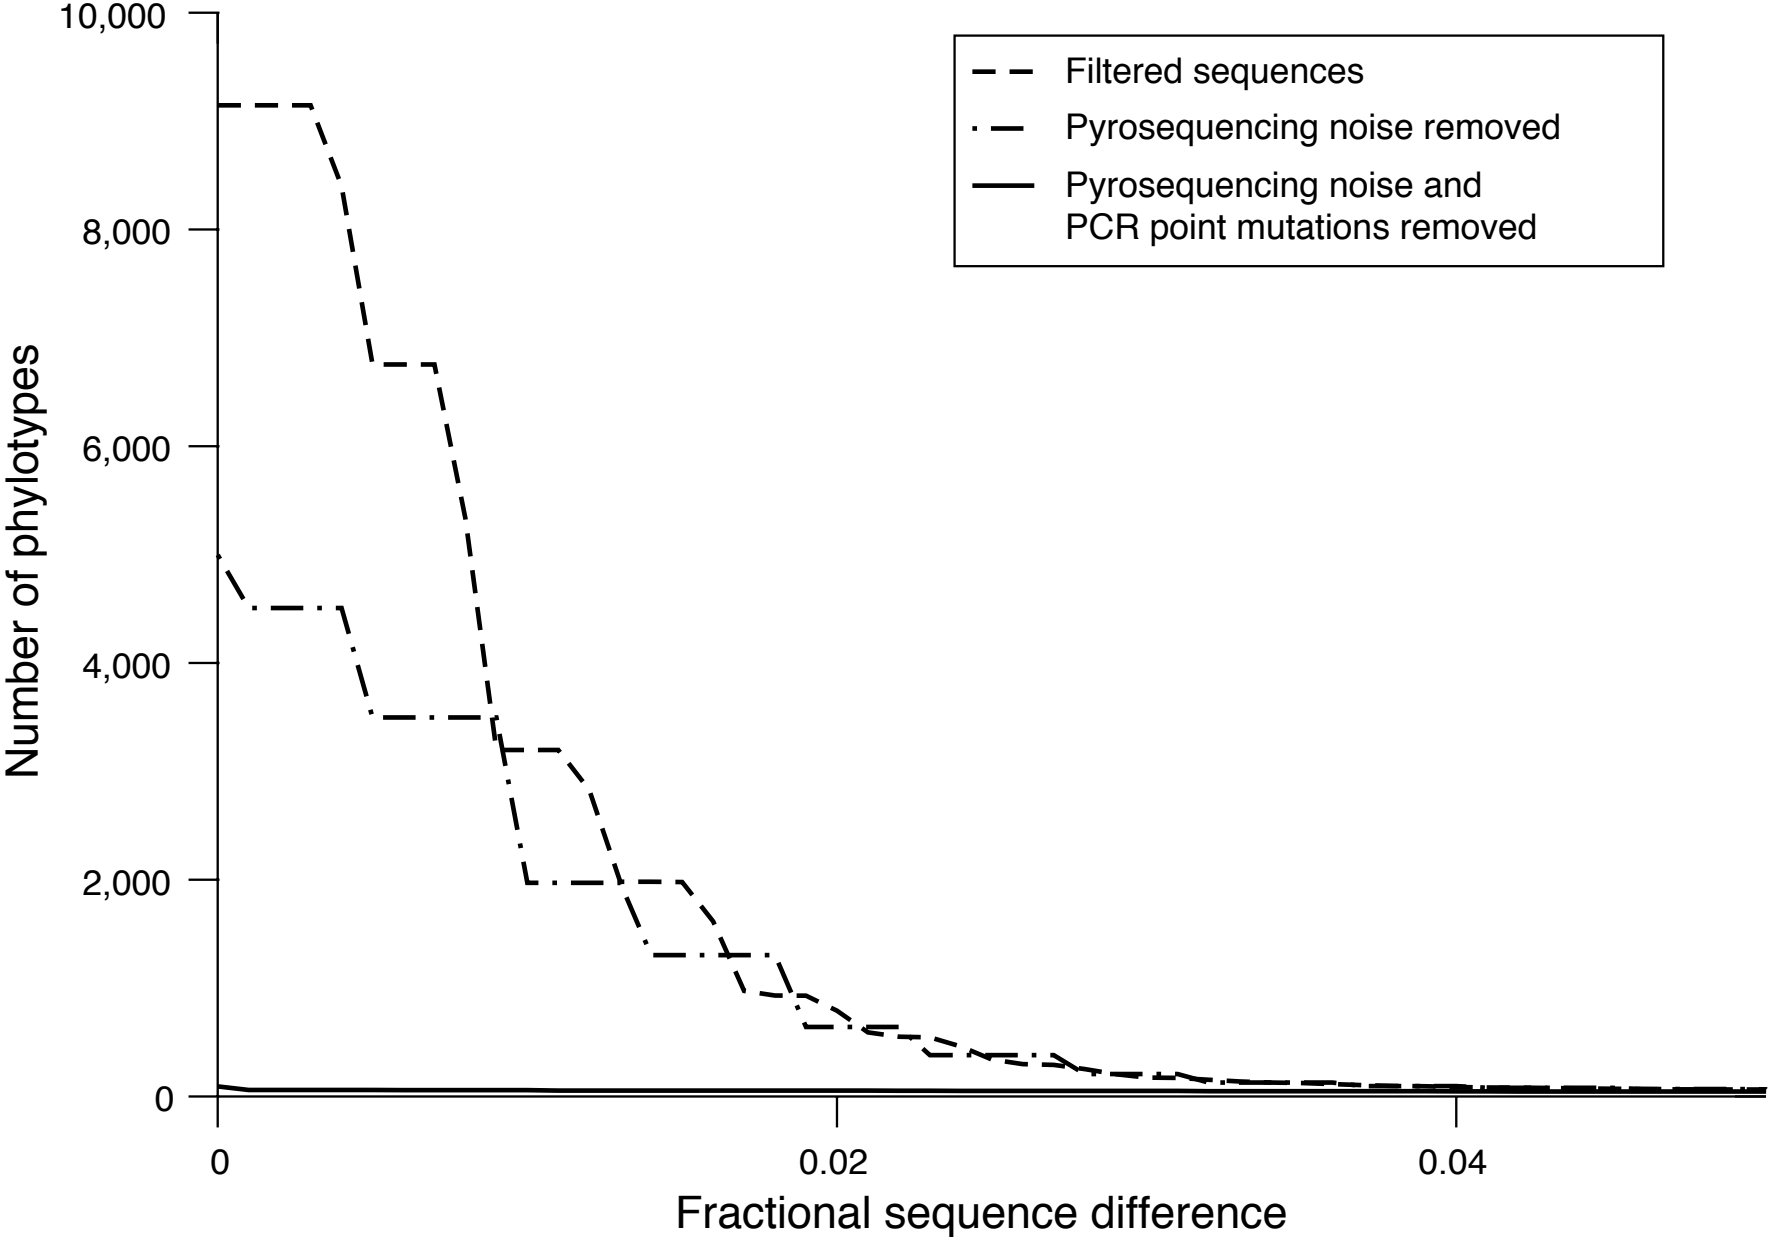

**Fig. S14. The frequency-abundance distributions for sequences classified as ‘chimeric’ (open symbols) or ‘good’ (filled symbols) by logistic regression for the Uneven1 dataset. Values are prior to (circles) and after (squares) incorporating abundance information. The final maximum likelihood abundance distribution fits are also shown.**



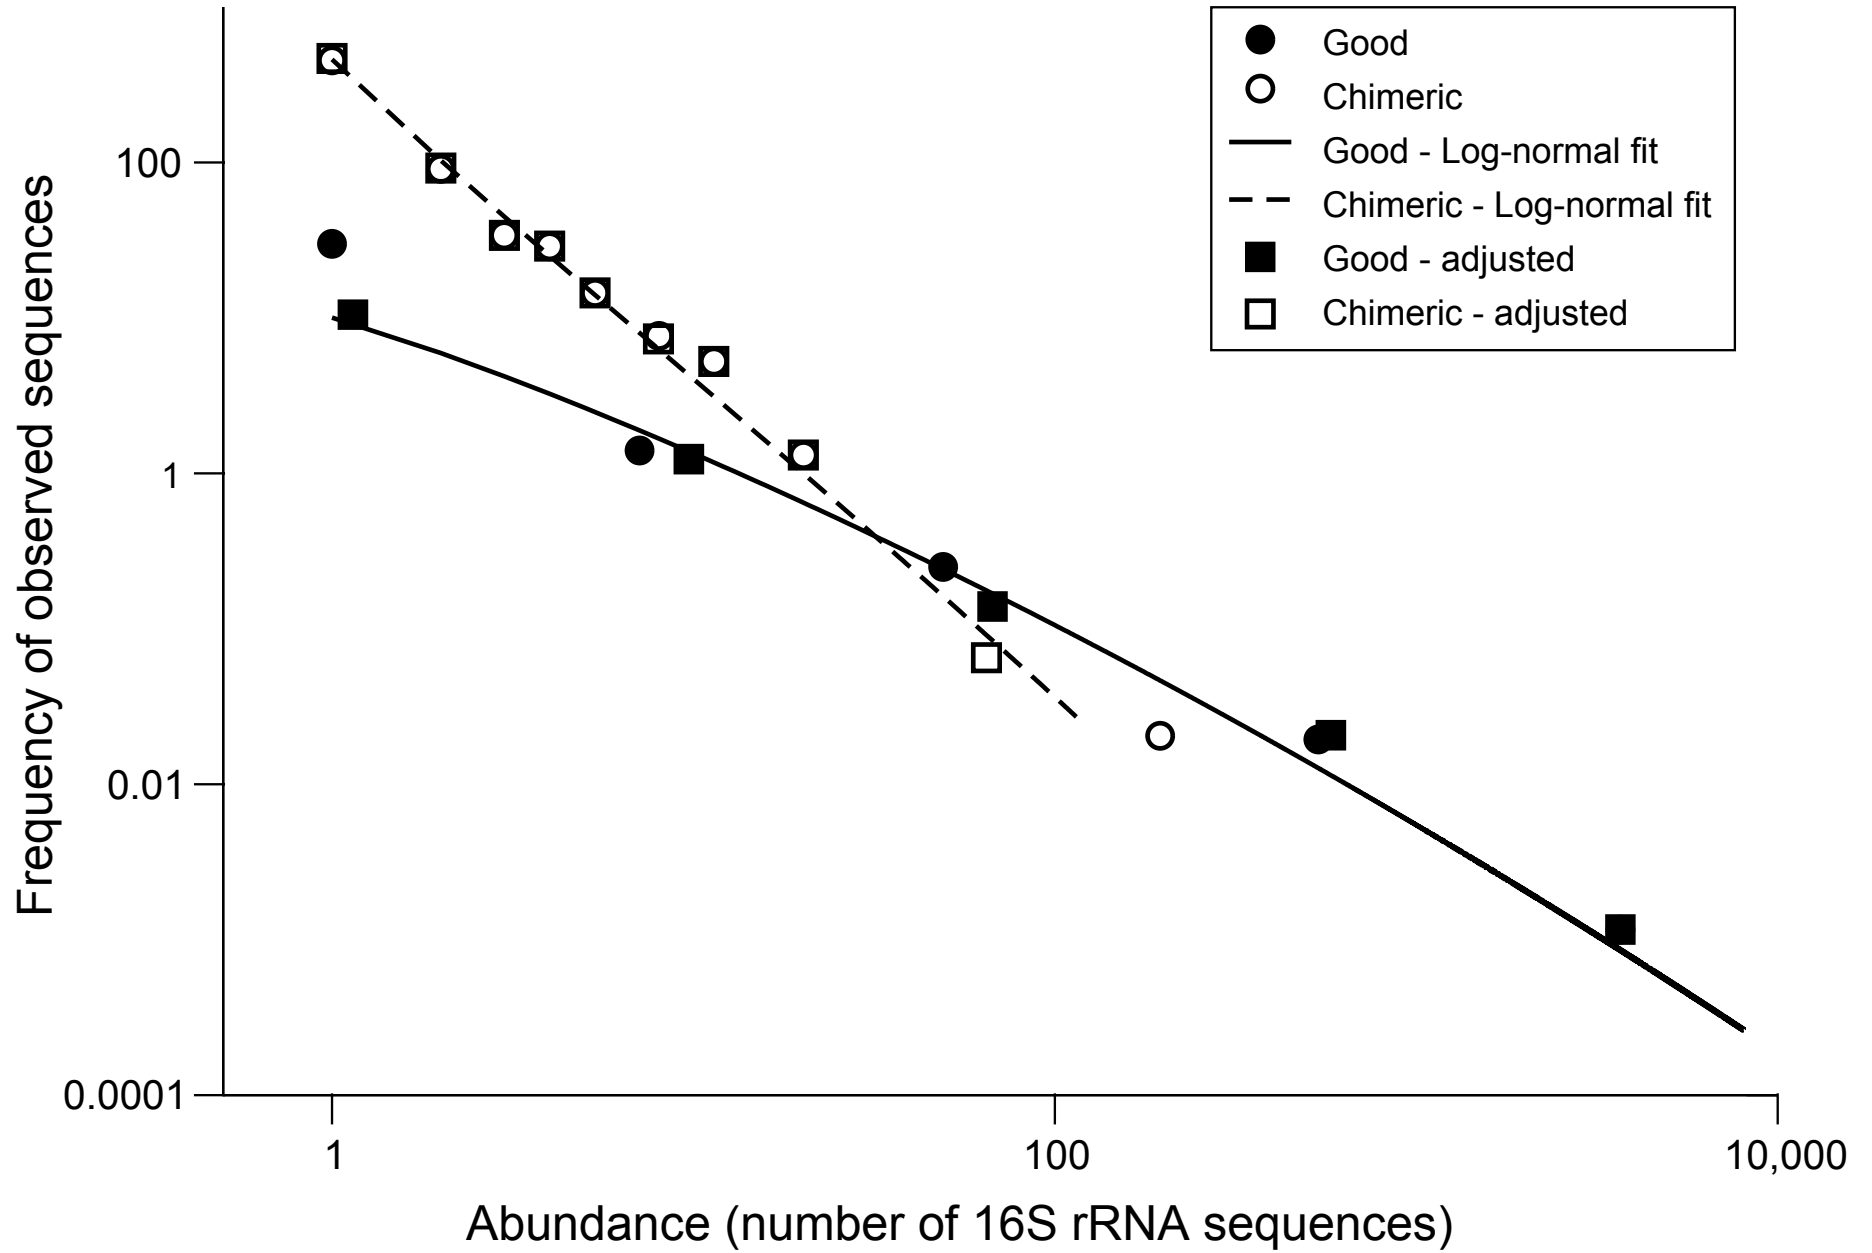

**Fig. S15. Rarefaction curves for all three unevenly mixed mock communities.** The 50% probability cut-off was used to classify sequences as chimeric. For comparison the total 97%ID phylotype richness in the control sequences is also shown (grey line).

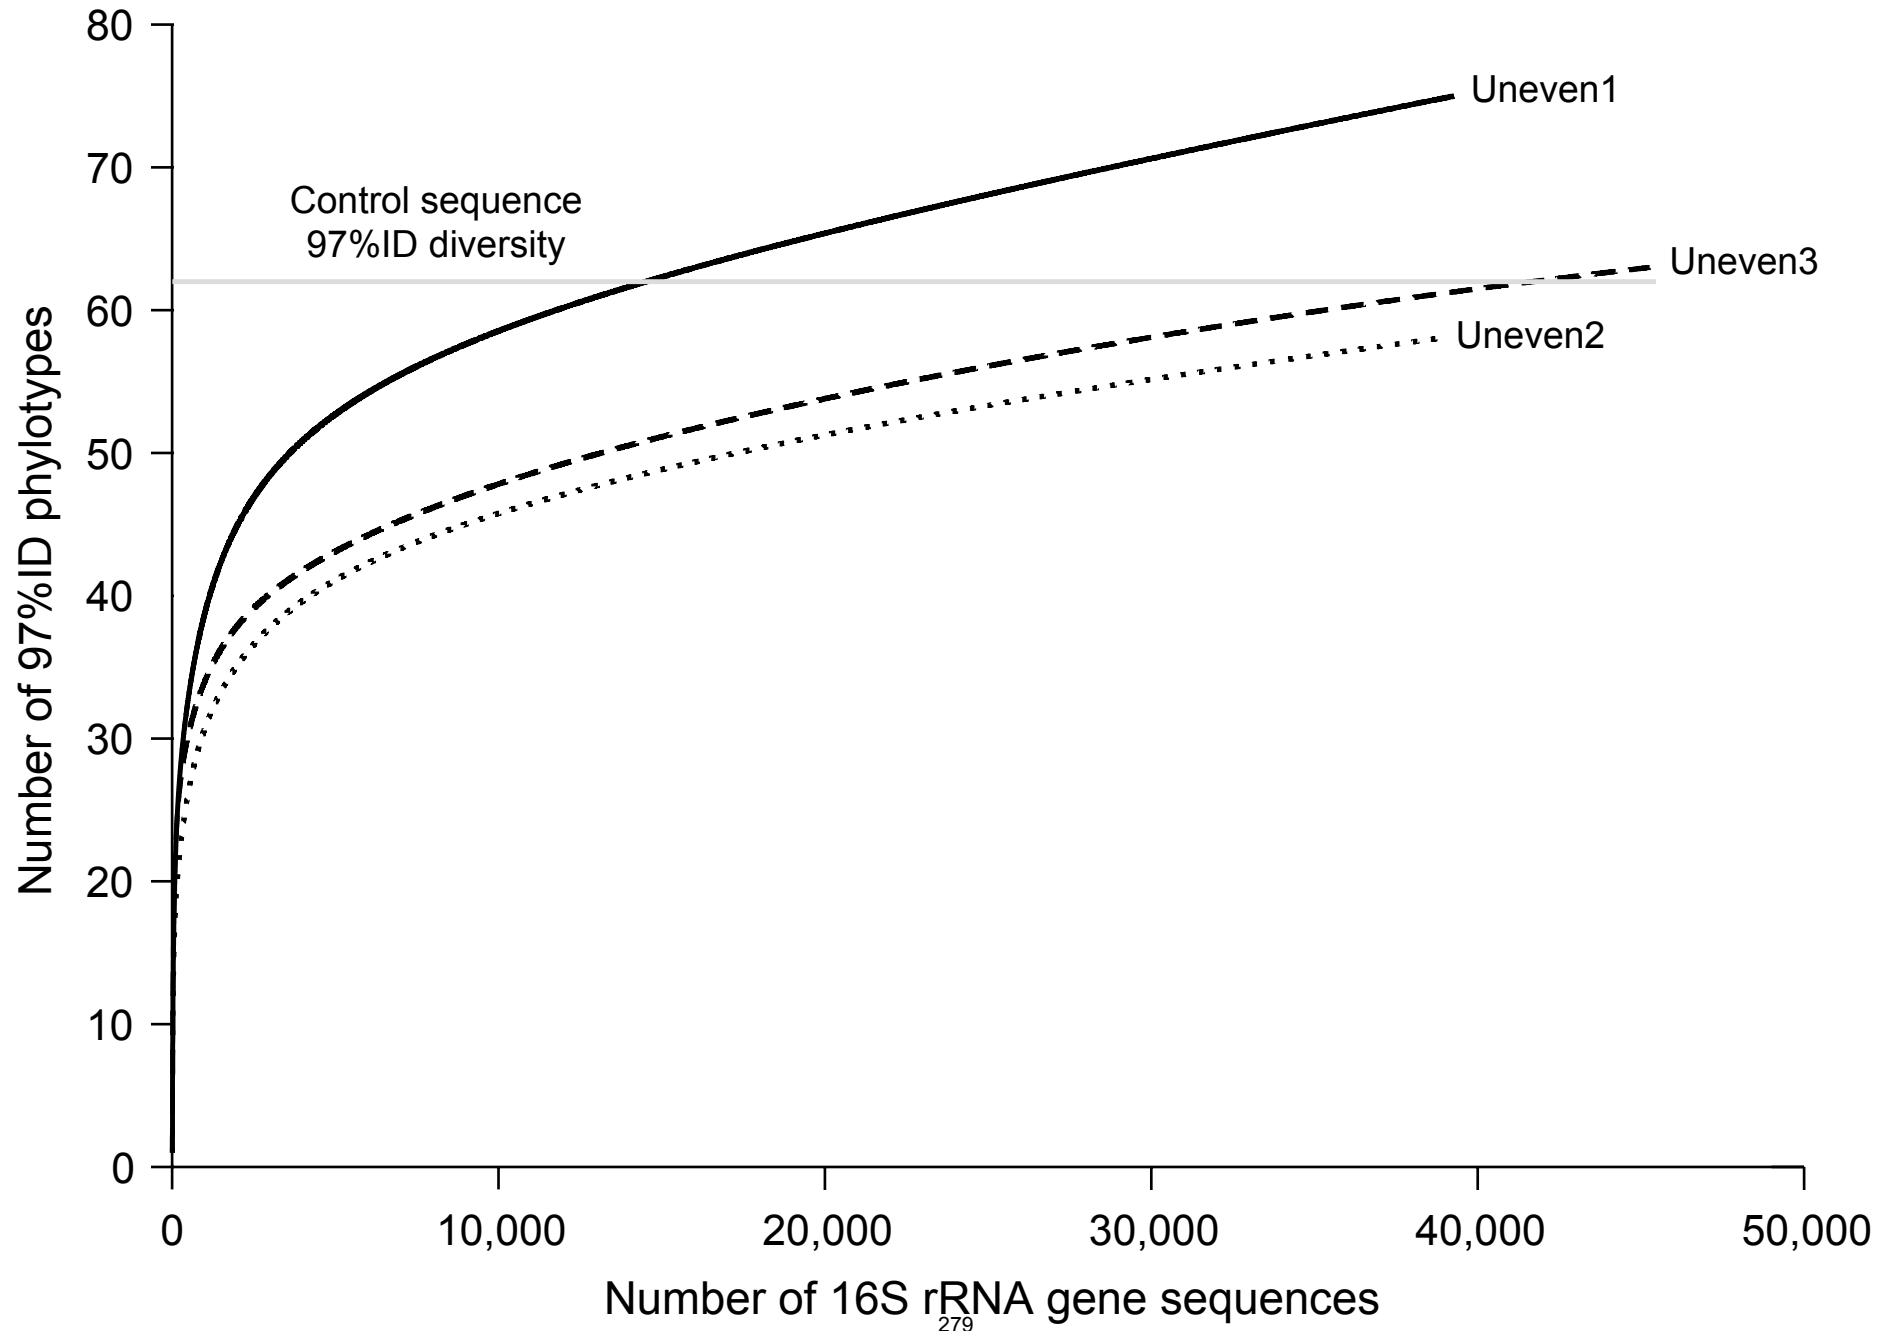

**Fig. S16. Accuracy of phylotype construction for the ‘Artificial community’ dataset as a function of the percentage sequence difference.** Regions represent phylotypes comprised of reference sequences and/or de-noised pyrosequencing reads.

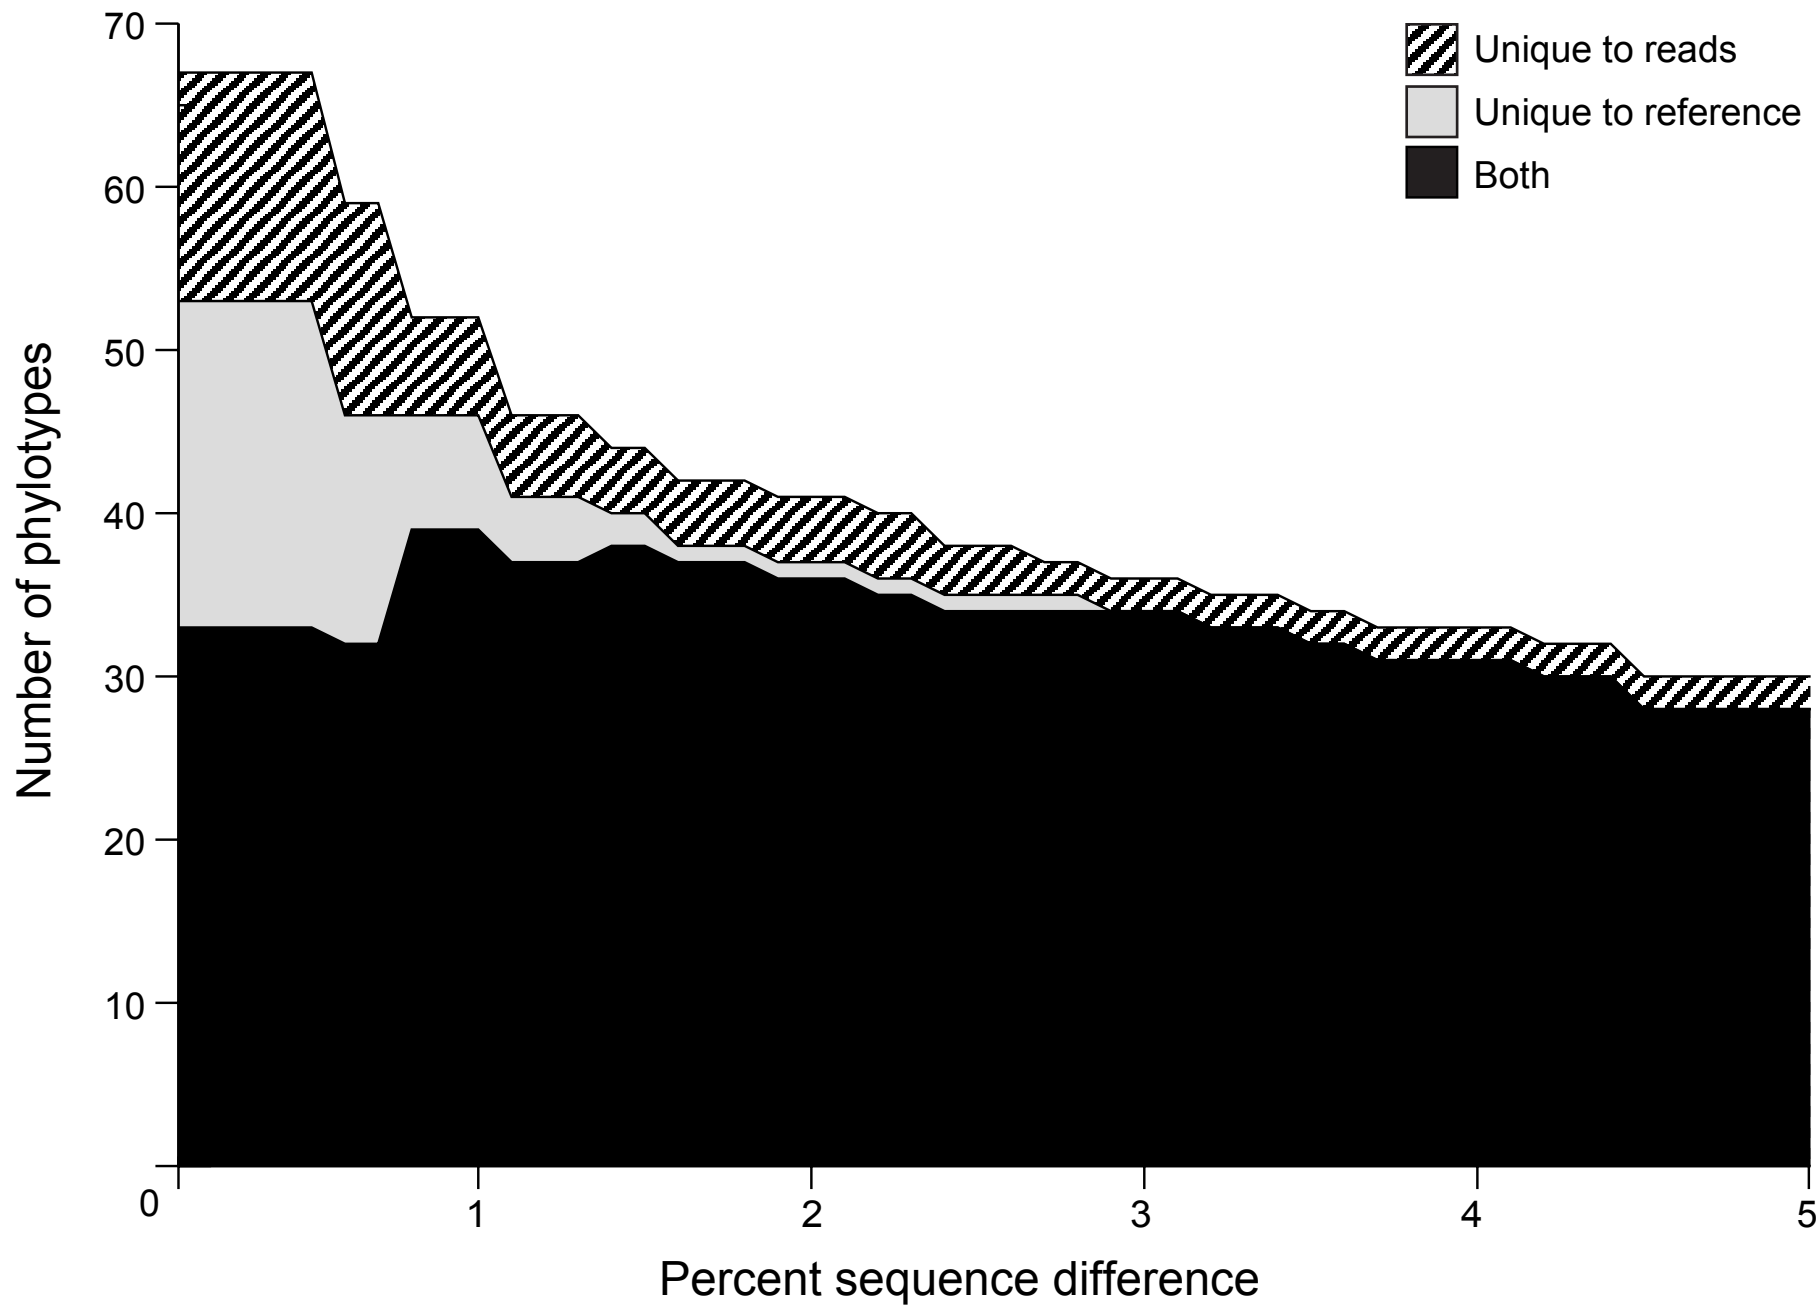

**Fig. S17. Correlation between the observed and the expected relative abundance of 97%ID phylotypes in the ‘Artificial community’.** The straight line gives the result of a linear regression forced through the origin which had  $R^2=0.96$ .

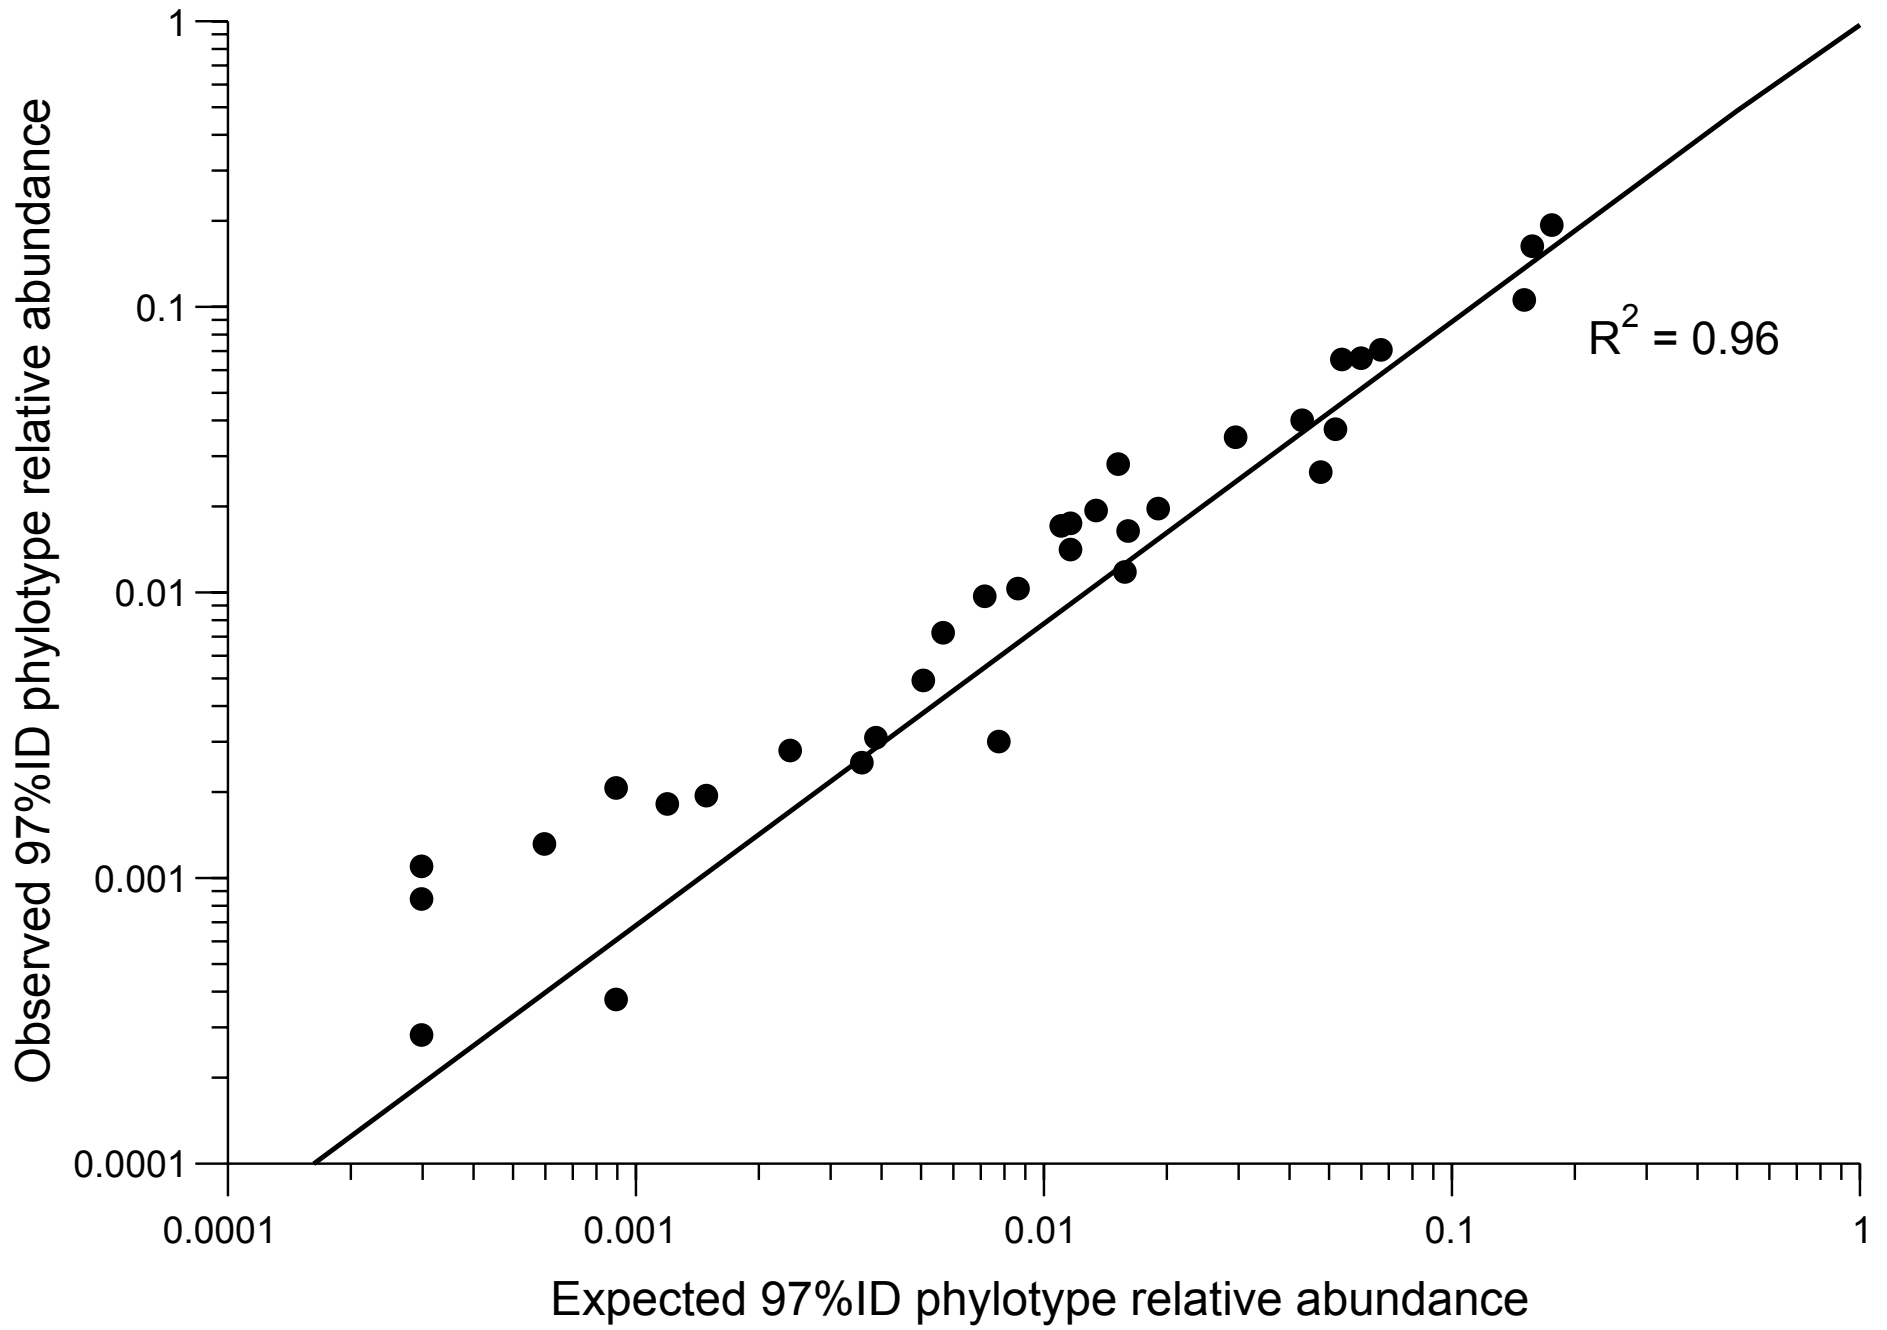

**Fig. S18. Accuracy of phylotype construction for the ‘Uneven1’ dataset as a function of the percentage sequence difference.** Regions represent phlotypes comprised of reference sequences and/or de-noised pyrosequencing reads.



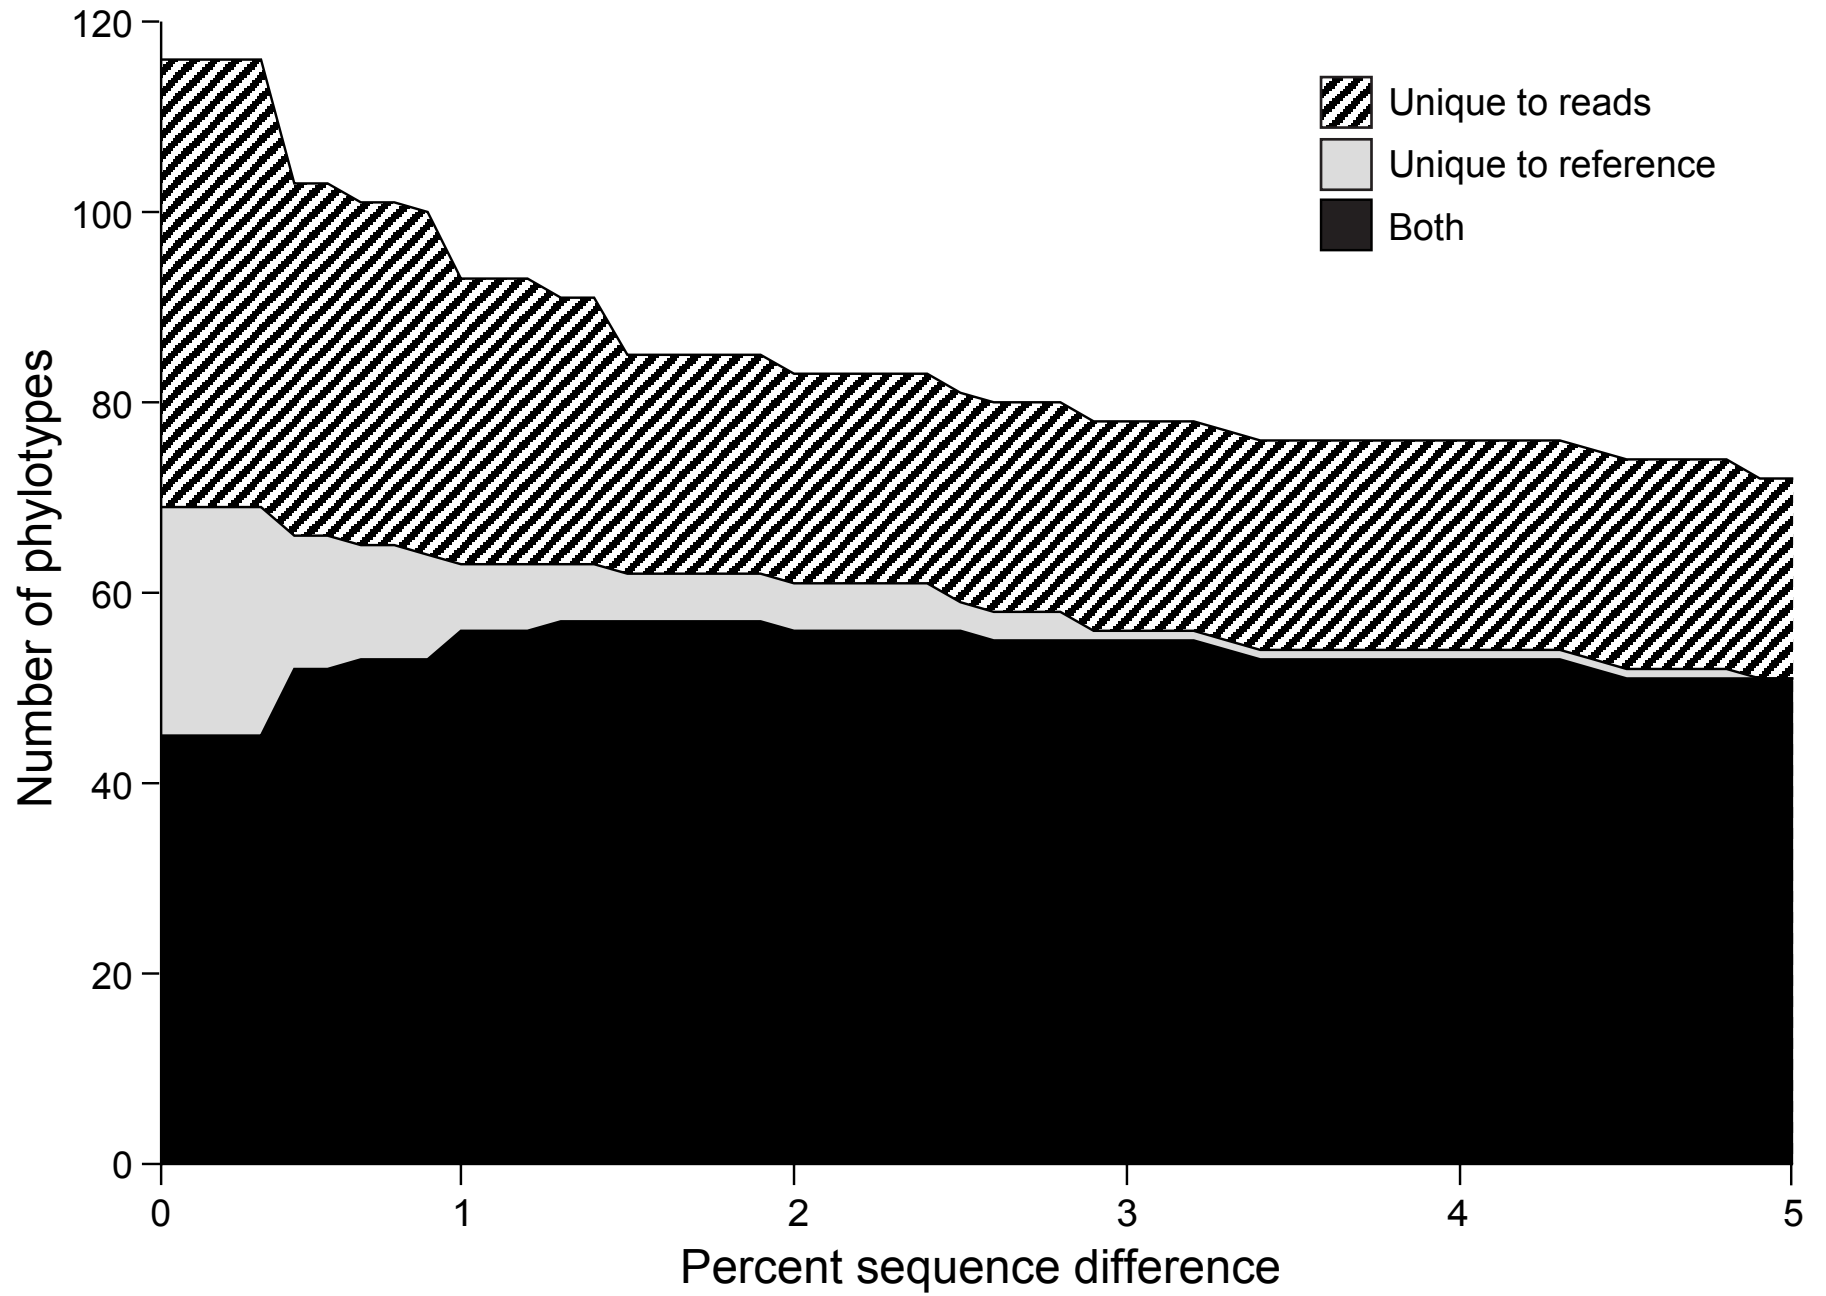

**Fig. S19. 97%ID phylotype rarefaction curves for the 'Deep Twins' datasets and two shallower datasets from the same fecal samples.** The 50% probability cut-off was used to classify sequences as chimeric.

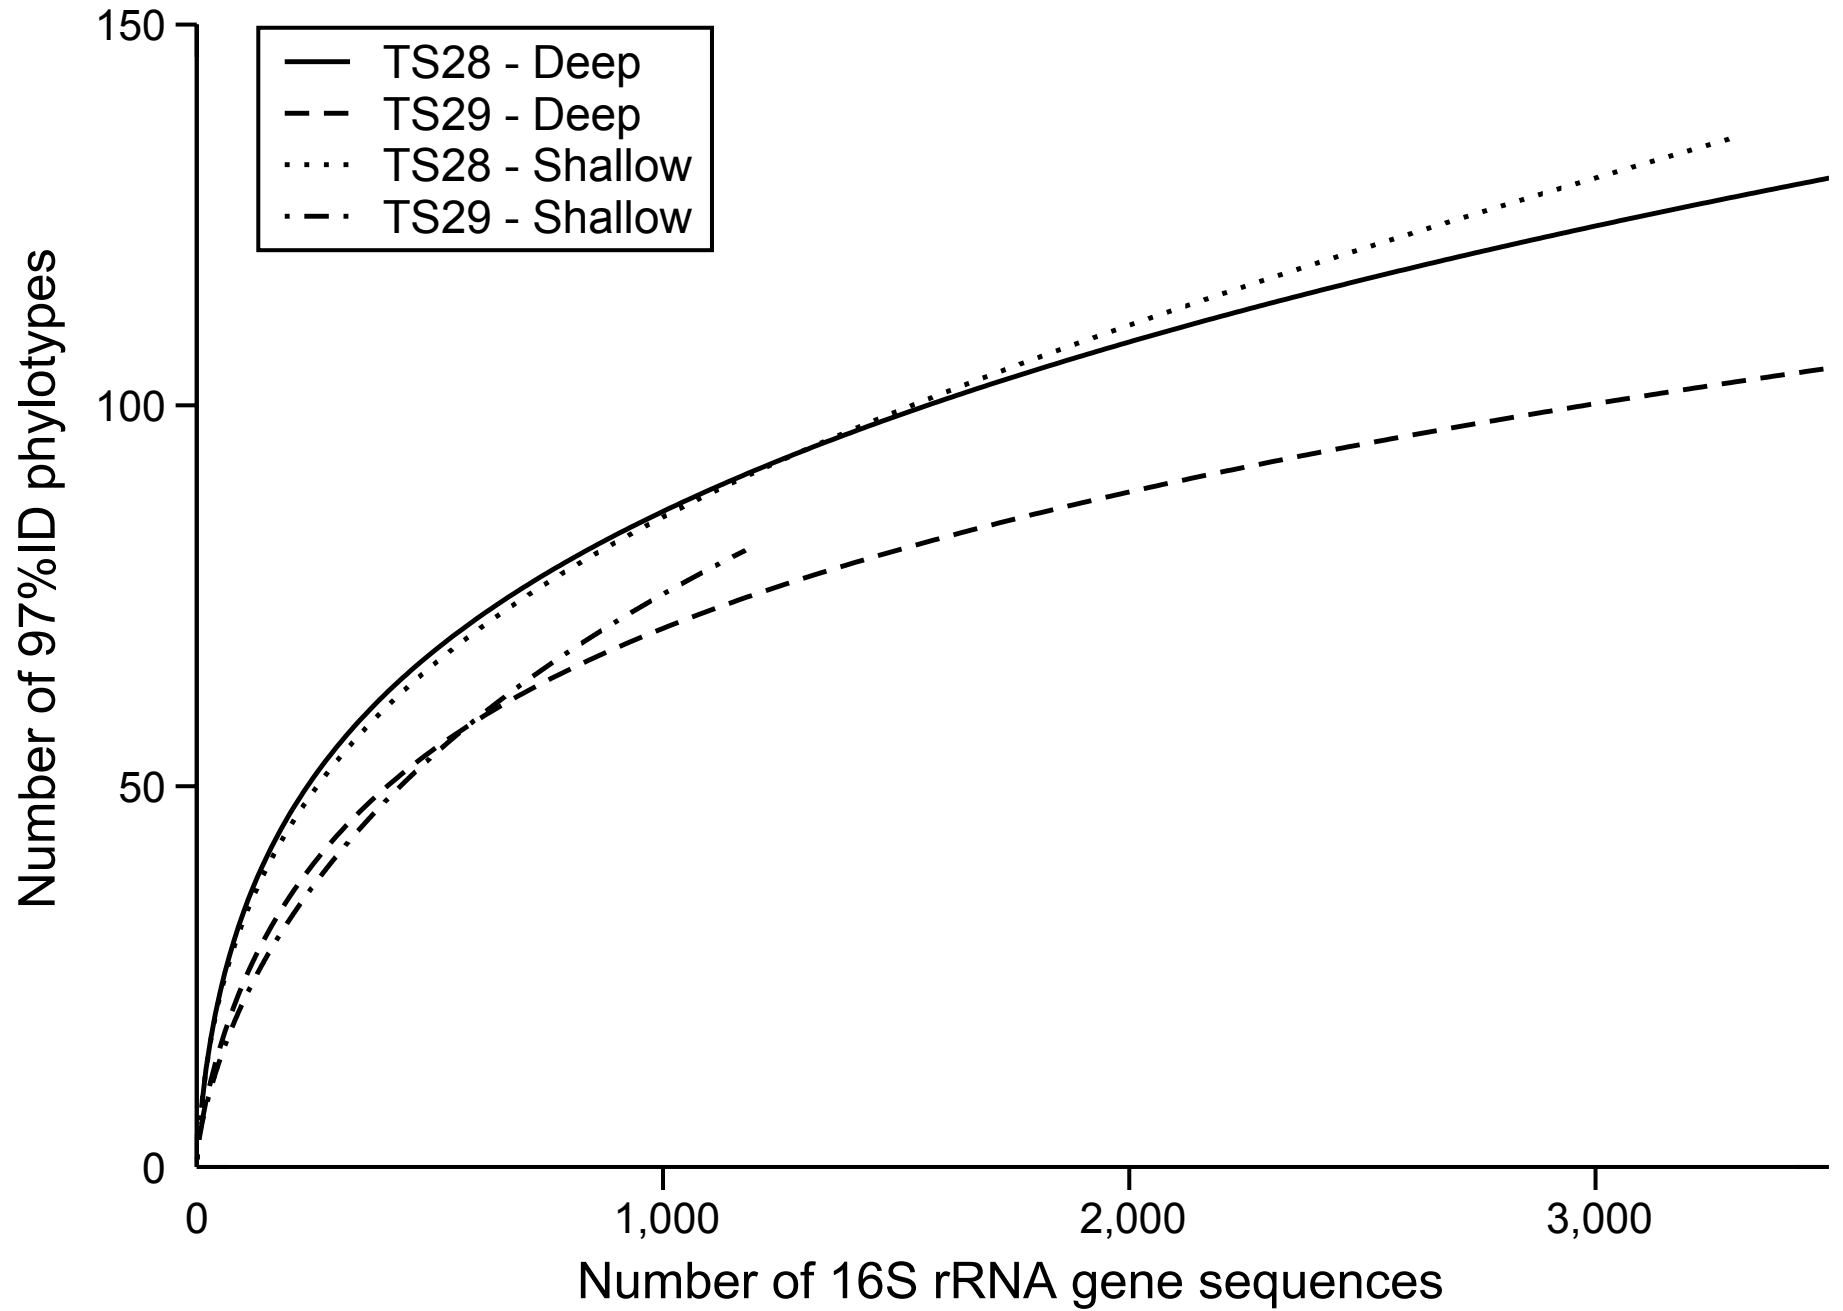

**Fig. S20. The distribution of the relative abundance of shared 97%ID phylotypes in the ‘Deep Twins’ datasets.** Relative abundance is calculated as the base 10 logarithm of the relative abundance in the fecal microbiota of TS29 divided by the relative abundance in the fecal microbiota of TS28.

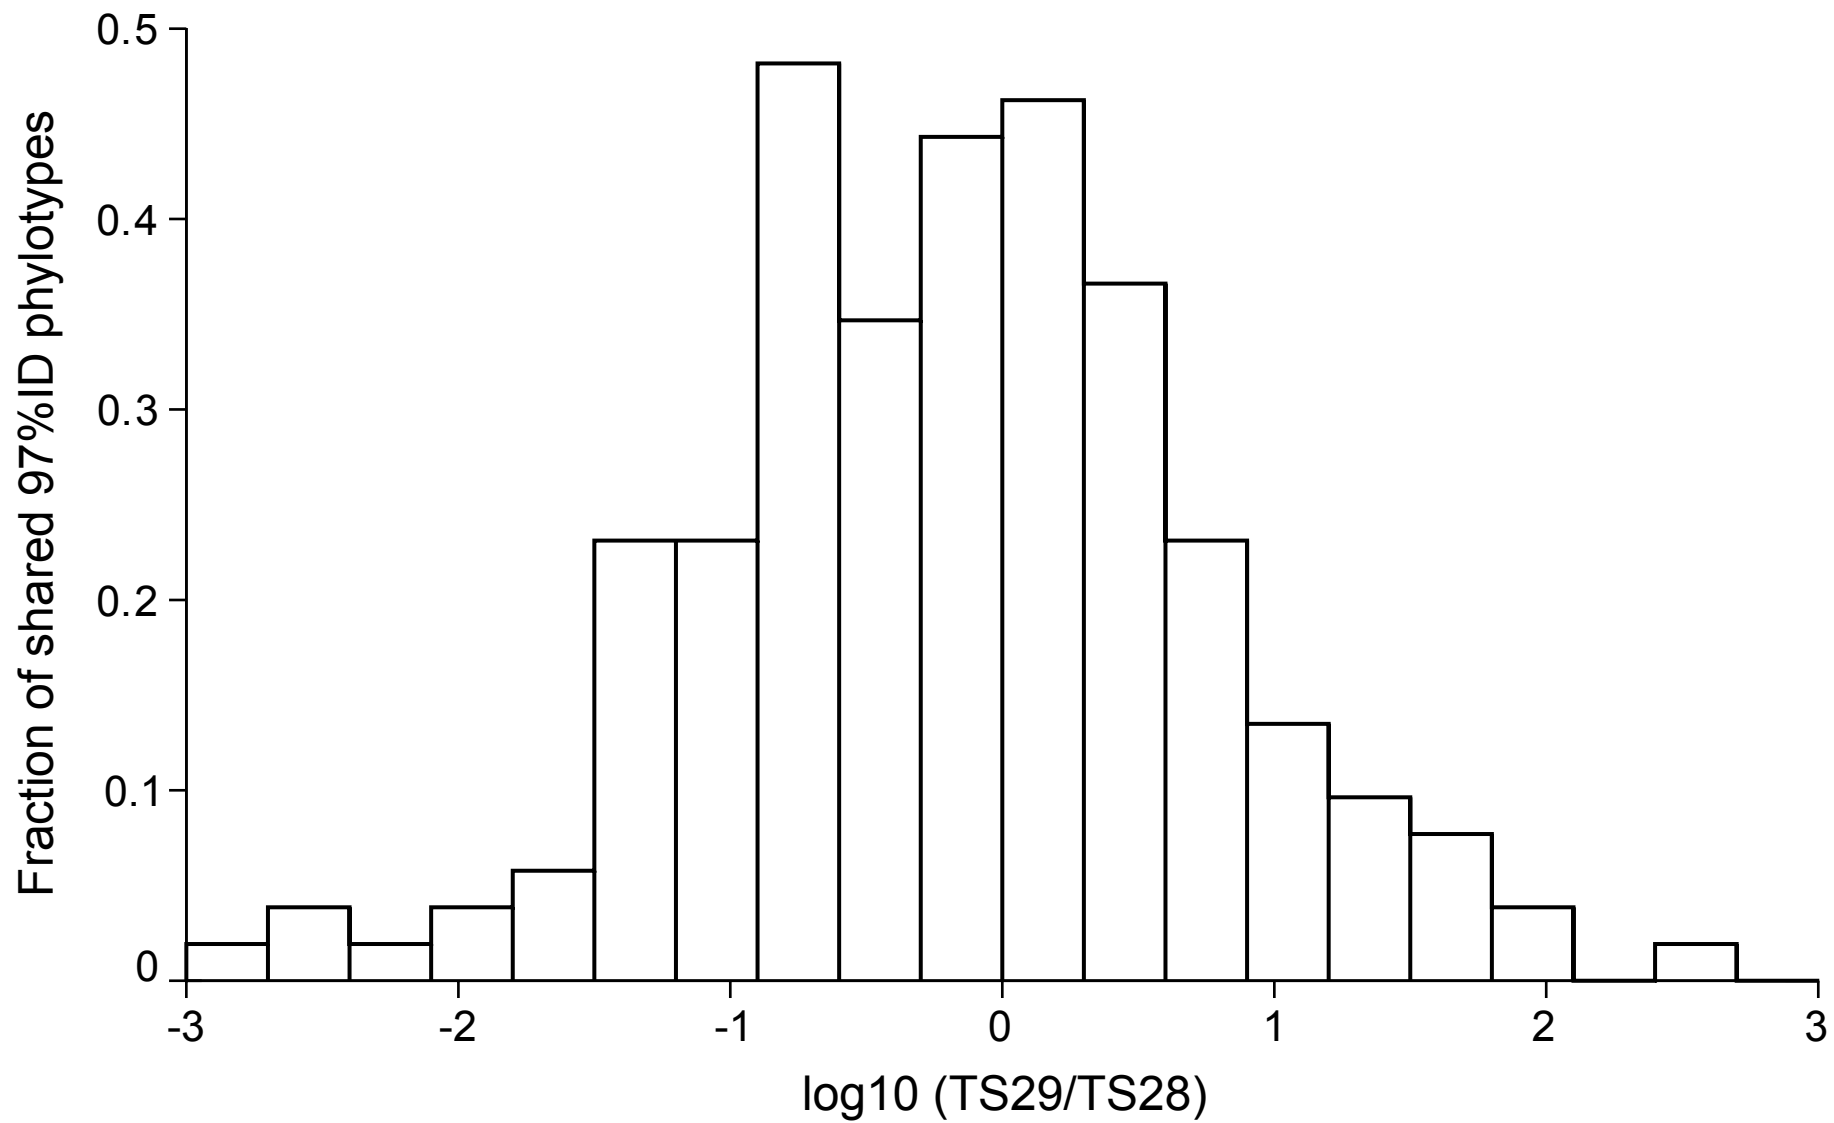

**Fig. S21. Comparison of diversity within and between microbial communities.**

Curves at 95%ID phylotype cutoff are shown for 250 fecal (gut) samples taken from 146 individuals ('Shallow twins'; 1,000 V2 16S rRNA gene sequences were randomly selected from each sample), 250 samples taken from multiple body habitats ('Whole body'; 1,000 randomly selected sequences per sample), and the two deeply sequenced fecal samples ('TS28-Deep' and 'TS29-Deep'). Phylotypes found in multiple fecal samples are labeled as 'co-occurring.'

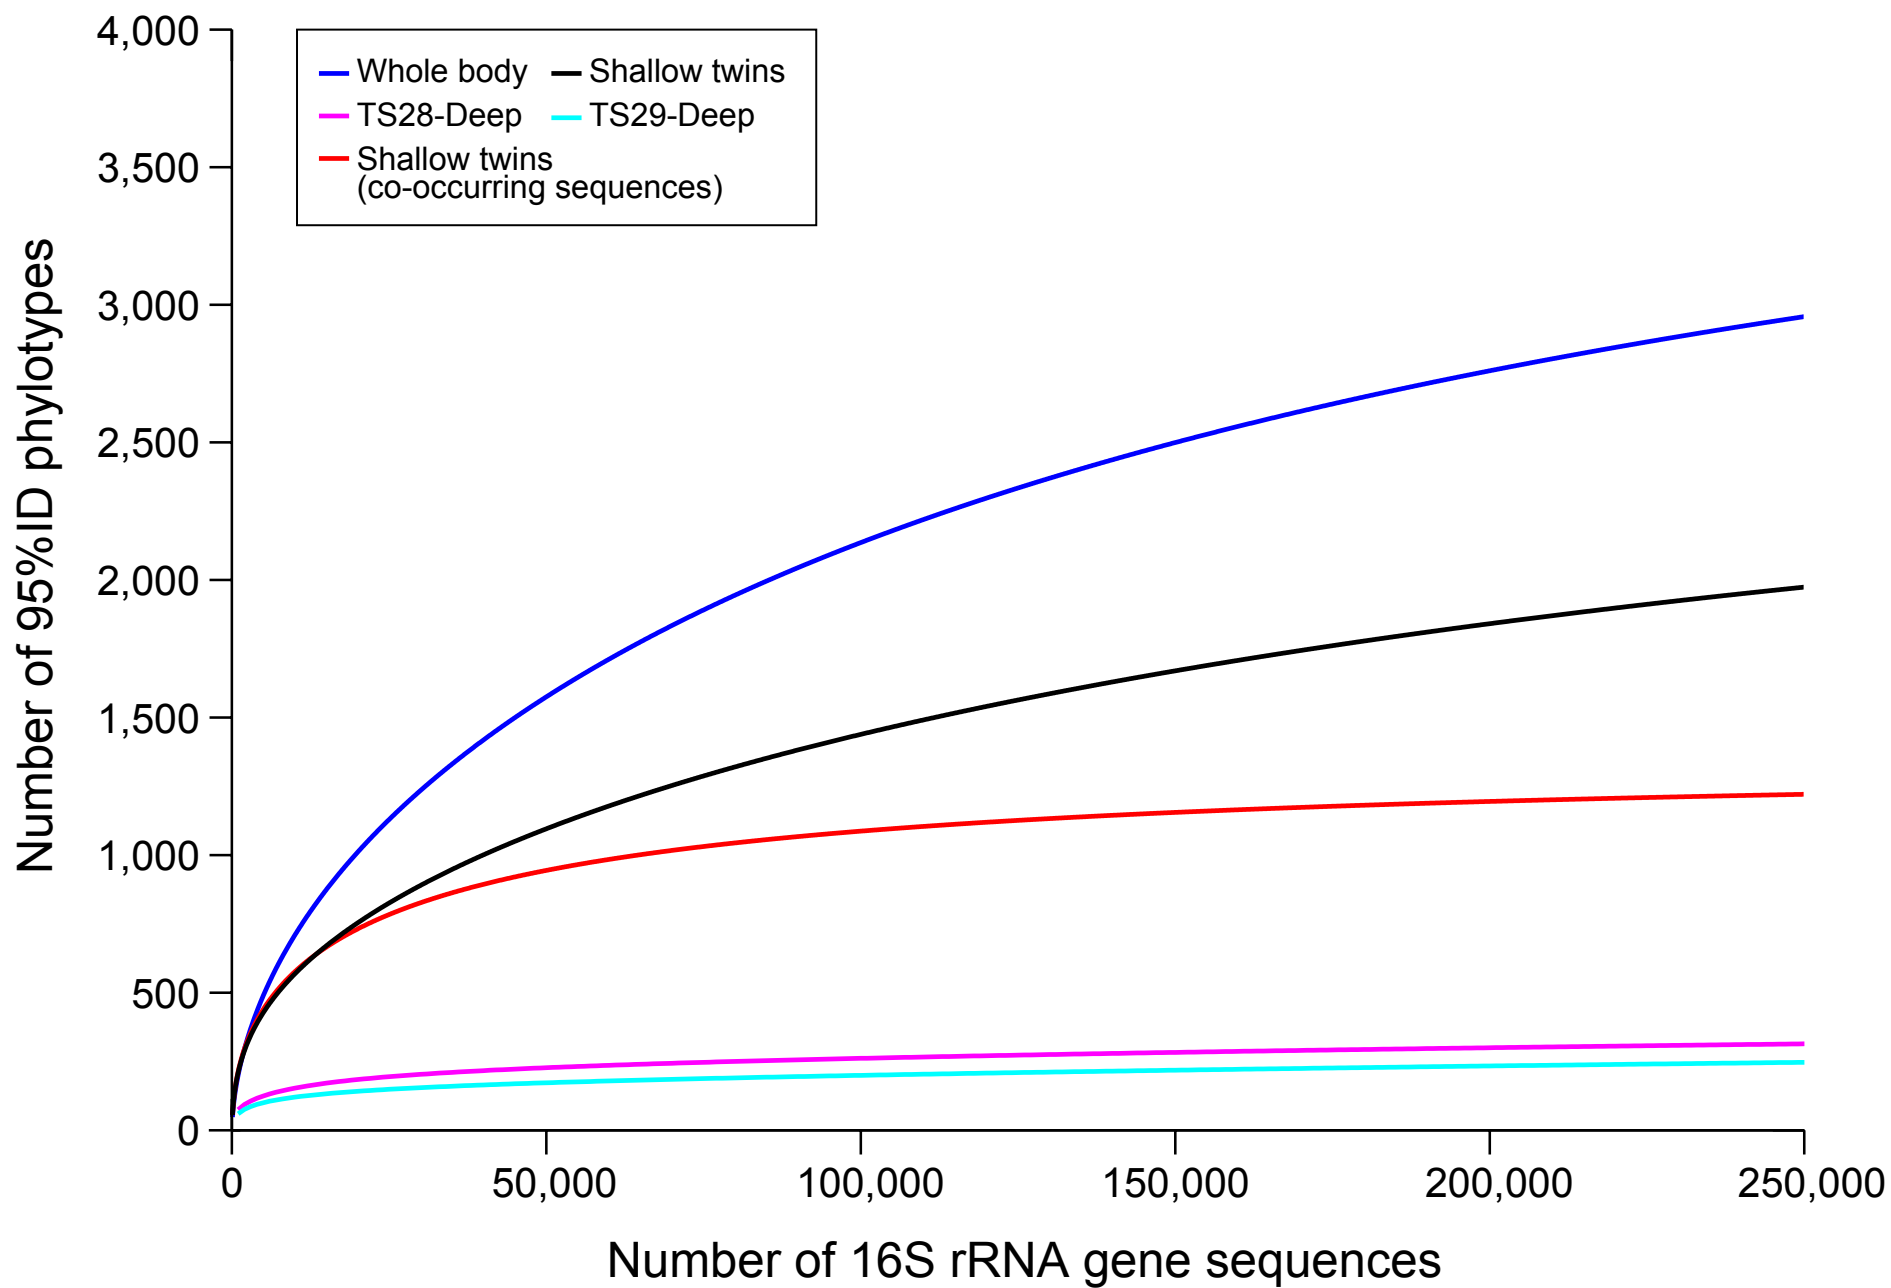

## SUPPORTING REFERENCES

1. McHardy AC, Martin HG, Tsirigos A, Hugenholtz P, & Rigoutsos I (2007) Accurate phylogenetic classification of variable-length DNA fragments. *Nat Methods* 4:63-72.
2. von Mering C, *et al.* (2007) Quantitative phylogenetic assessment of microbial communities in diverse environments. *Science* 315:1126-1130.
3. Larkin MA, *et al.* (2007) Clustal W and Clustal X version 2.0. *Bioinformatics* 23:2947-2948.
4. Ning Z, Cox AJ, & Mullikin JC (2001) SSAHA: a fast search method for large DNA databases. *Genome Res* 11:1725-1729.
5. Turnbaugh PJ, *et al.* (2009) A core gut microbiome in obese and lean twins. *Nature* 457:480-484.
6. Quince C, *et al.* (2009) Accurate determination of microbial diversity from 454 pyrosequencing data. *Nat. Methods* 6:639-U627.
7. Costello EK, *et al.* (2009) Bacterial community variation in human body habitats across space and time. *Science* 326:1694-1697.
8. Huse SM, Huber JA, Morrison HG, Sogin ML, & Mark Welch D (2007) Accuracy and quality of massively parallel DNA pyrosequencing. *Genome Biol.* 8:9.
9. Needleman SB & Wunsch CD (1970) A general method applicable to the search for similarities in the amino acid sequence of two proteins. *J Mol Biol* 48:443-453.
10. Hand DJ & Yu KM (2001) Idiot's Bayes - Not so stupid after all? *Int. Stat. Rev.* 69:385-398.
11. Quince C, Curtis TP, & Sloan WT (2008) The rational exploration of microbial diversity. *Isme J.* 2:997-1006.
12. Breuert S, Allers T, Spohn G, & Soppa J (2006) Regulated polyploidy in halophilic archaea. *PLoS ONE* 1:e92.
13. Chao A & Lee SM (1992) Estimating the number of classes via sample coverage. *J. Am. Stat. Assoc.* 87:210-217.
14. Hong SH, Bunge J, Jeon SO, & Epstein SS (2006) Predicting microbial species richness. *Proc. Natl. Acad. Sci. U. S. A.* 103:117-122.
15. Wang Q, Garrity GM, Tiedje JM, & Cole JR (2007) Naive Bayesian classifier for rapid assignment of rRNA sequences into the new bacterial taxonomy. *Appl Environ Microbiol* 73:5261-5267.
16. de Hoon MJ, Imoto S, Nolan J, & Miyano S (2004) Open source clustering software. *Bioinformatics* 20:1453-1454.
17. Saldanha AJ (2004) Java Treeview--extensible visualization of microarray data. *Bioinformatics* 20:3246-3248.
